# Supplementary material for: The Impact of Low Cardiac Output on Propofol Pharmacokinetics across Age Groups—An Investigation Using Physiologically Based Pharmacokinetic Modelling
Source: Pharmaceutics. 2022 Sep 16;14(9):1957. doi: 10.3390/pharmaceutics14091957 (PMC9502676; doi:10.3390/pharmaceutics14091957)
Supplement: Supplementary file 1 [file pharmaceutics-14-01957-s001.zip]

Archive with 4 entries (4 files):
- Propofol  Paed Model 20% reduction cardiac output.xlsx
- Propofol Adult Model.xlsx
- Propofol paediatric Model.xlsx
- Supplementary materials pharmaceutics PBPK CO 05082022.pdf
