# Supplementary material for: The Impact of Low Cardiac Output on Propofol Pharmacokinetics across Age Groups—An Investigation Using Physiologically Based Pharmacokinetic Modelling
Source: Pharmaceutics. 2022 Sep 16;14(9):1957. doi: 10.3390/pharmaceutics14091957 (PMC9502676; doi:10.3390/pharmaceutics14091957)
Supplement: Supplementary file 1 [file pharmaceutics-14-01957-s001.zip › Propofol Adult Model.xlsx]

## Sheet: Summary
Simcyp Population Based Simulator
2022-07-05 19:06:54
Simcyp Version 19 (19/12/2019)
Input Parameters
Output Parameters
Input Parameters
Workspace	Propofol_Retrogrademodel_OO_etal_NEW_Ad_RobertModel
Substrate	Wsp-Propofol_retrograde_Cyp2B6
Simulation Mode	PKPD Parameters + PKPD Profiles
	Substrate				Substrate
Compound Name	Wsp-Propofol_retrograde_Cyp2B6
Mol Weight (g/mol)	178.3			Distribution Model	Full PBPK Model
log P	3.8			Vss	Predicted
Compound Type	Neutral			Prediction Method	Method 2
pKa 1	n/a
pKa 2	n/a			Clearance Type	Enzyme Kinetics
B/P	1.27689
Haematocrit	45
fu	0.0560833
Trial Design
					Substrate
Population Name	Sim-Healthy Volunteers			Prandial State	Fasted
Use Pop Representative	No			Route	Custom
Population Size	200
Number of Trials	1
No. of Subjects per Trial	200
Start Day/Time	Day 1, 09:00
End Day/Time	Day 1, 11:00
Study Duration (h)	2
Sampling Time	Pre-defined Uniform
Sampling Site Selection	Off
Output Parameters
PKPD Parameters	Mean	Median	Geometric mean	Confidence Interval		Can be found in Excel sheet
CL (L/h)	99.8396	99.2493	95.8339	92.5109	99.2763	Clearance Trials SS
CLpo (L/h)	357.269	277.385	284.529	263.273	307.501	Clearance Trials SS
fa (Sub)	0.875448	0.92985	0.861937	0.843626	0.880645	Clearance Trials SS
Fg (Sub)	0.991562	0.993078	0.991545	0.990873	0.992218	Clearance Trials SS
Fh (Sub)	0.421025	0.420112	0.394099	0.376587	0.412424	Clearance Trials SS
F (Sub)	0.36707	0.361785	0.336816	0.319863	0.354668	Clearance Trials SS
Vss (Subs)(L/Kg)	16.0076	15.7574	15.5294	15.0833	15.9888	Distribution - Vols
PKPD Profiles	Mean	Median	Geometric mean	Confidence Interval		Can be found in Excel sheet
CMax (µg/mL)	12.5834	12.3554	12.4696	12.274	12.6683	AUC
TMax (h)	0.00555534	0.00587726	0.00552248	0.00545088	0.00559502	AUC
AUC (µg/mL.h)	0.13066	0.128715	0.129747	0.127955	0.131564	AUC
CMin (µg/mL)	0	0	n/a	n/a	n/a	AUC
CL (Dose/AUC)(L/h)	587.652	586.319	581.315	571.335	591.469	AUC

## Sheet: Input Sheet
Simcyp Population Based Simulator
2022-07-05 19:06:55
Simcyp Version 19 (19/12/2019)
Substrate			Trial Design			Simulation Toolbox			Software Version Detail
Compound Name	Wsp-Propofol_retrograde_Cyp2B6		Use Pop Representative	No		Random Number Generator	Mersenne Twister (MT19937)		Simulation Duration(seconds)	9
Version number	Not applicable		Population Size	200		Seed	Fixed		Windows Version	Windows 10
Molecule Type	Small Molecule		Number of Trials	1		Seed Value	1		Excel Version	Excel 2016
Route	Custom		No of Subjects per Trial	200		Sampling Site Selection	Off		Source File Location	C:\Program Files\Simcyp Simulator V19\Screens\
			Population name	Sim-Healthy Volunteers		Memory Size	4000000		Excel Embedded Workspace	No
PhysChem and Blood Binding			Version number	19.0 .0					Simcyp Version	19.0.96.0
			Minimum Age (years)	18		Paediatric Module	Not Loaded		Licence Details
Mol Weight (g/mol)	178.3		Maximum Age (years)	45
log P	3.8		Propn. of Females	0.32		ODE Solver Settings			User name	AD\mbzoo
Compound Type	Neutral		Fix Individual Trial Design	No					Domain name	ad.nottingham.ac.uk
Extended Clearance Classification System	Class 2 - Metabolism		Prandial State	Fasted		No. Differential Equations	31		Computer name	LUIN68894
BP input type	Predicted		PKPD Parameters	On		Solver sampling interval (h)	0.01		Simcyp Standard licence: agreement identifier
B/P	1.27689		PKPD Profiles	On		Solver sampling interval (h) (ADAM)	0.05		Simcyp Standard licence: agreement type	Academic teaching and research
Haematocrit	45		Start Day/Time	Day 1, 09:00		Sampling Time	Pre-defined Uniform		Simcyp Standard licence: organisation	University of Nottingham
fu Input	Predicted (QSAR)		End Day/Time	Day 1, 11:00		Number of time samples	1000		Simcyp Standard licence: machine identifier	28C533CC-3119-11B2-A85C-E23748301C39
fu	0.0560833		Study Duration (h)	2					Simcyp Standard licence: source	Desktop
Quaternary Nitrogen	No					Negative Cut-off	1e-08		Simcyp Standard licence: usage	Client
Reference Binding Component	HSA		Sub : Route	Custom		Positive Cut-off	1e-20		Simcyp Standard licence: issued	Mon Sep 13 10:15:46 2021
Protein Reference Conc (g/L)	45					Differential Solver	5th-order Runge-Kutta		Simcyp Standard licence: valid from	Sun Sep 12 23:00:00 2021
% Bound to Lipoprotein	0		AUC Calculations (Substrate)			Maximum number of steps	1000000		Simcyp Standard licence: valid to	Mon Sep 5 22:59:59 2022
% Bound to Lipoprotein (CV %)	0		Calculated AUCt first dose	Yes		Relative Tolerance	1e-15
			Calculated AUC_INF	Yes		Relative Tolerance when ADAM is used	1e-09
Absorption			Calculated AUCt last dose	No		Integration error tolerance	0.001
			Integrated AUCt first dose	Yes
			Integrated AUCt last dose	No		ADAM Model Specific Settings
Distribution			Integrated AUCt user interval	No
			Method	Linear Trapezoidal		Solubility Cap (mg/mL)	500
Distribution Model	Full PBPK Model		Weighting Option	Weighted by reciprocal of prediction squared (1/ŷ²)		Use UBL fluid volumes	Off
Replacement Organ?	No					Apply Minimum Mass Limit(ADAM)	Off
Organ Replaced	n/a					Minimum Mass Limit	n/a
User-defined Additional Organ	No					Minimum Norm. Scalar (pH surface model)	1e-11
Type	n/a					Newton Convergence Tol (pH surface model)	1e-14
Vss input type	Predicted					Time Interval (pH surface model)	0.01
Vss (L/kg)	16.0964					ConstDR (MBO Model)	10000
Prediction Method	Method 2					Radius Rate Cap (PPB Model)(µm/h)	500
Concentration-dependent volume	No					Precipitation Delay Time (Sec)	0.001
log Po:w	3.8					CR Cut-off (%)	99.9
logP vo:w input type	Predicted
logP vo:w Prediction Method	Hansch					LUA Scripting(ADAM)	Off
logP vo:w Hansch a	1.115
logP vo:w Hansch b	-1.35
logP vo:w	2.887
Compound Type	Neutral
Adipose input type	Predicted
Adipose	34.1916
Bone input type	Predicted
Bone	26.3272
Brain input type	Predicted
Brain	24.0903
Gut input type	Predicted
Gut	19.0044
Heart input type	Predicted
Heart	5.87481
Kidney input type	Predicted
Kidney	9.08926
Liver input type	Predicted
Liver	15.0327
Lung input type	Predicted
Lung	2.06285
Muscle input type	Predicted
Muscle	9.22916
Skin input type	Predicted
Skin	11.2687
Spleen input type	Predicted
Spleen	9.25948
Pancreas input type	Predicted
Pancreas	15.5399
Kp Scalar	1
Smoothing Function	Off
Lipid Binding Scalar	1
Use Pvo:w for Neutral Lipid Partition in All Tissues	No
Elimination
Clearance Type	Enzyme Kinetics
FI Correction	Not used
PLR Correction	Not Used
In vitro metabolic system	Recombinant
Pathway	4-OH
Enzyme	CYP2B6
CLint (µL/min/pmol)	39.1841
fu mic	1
Pathway	4-OH
Enzyme	CYP2C9
Genotype	*1/*1
CLint (µL/min/pmol)	0.605667
fu mic	1
In vitro metabolic system	Recombinant
Pathway	Pathway 1
Enzyme	UGT1A9
CLint (µL/min/mg protein)	360
fu mic	1
rUGTSystem	User
rUGTScalar - Liver	1
rUGTScalar - Intestine	1
rUGTScalar - Kidney	19.5
Feed formed renal metabolite into kidney	No
Use Allelic variants for Enzyme 1	No
Enzyme	CYP2C9
Use Allelic variants for Enzyme 2	No
Enzyme	CYP1A2
Gut Lumen metabolism	in-active
Ontogeny Profile	No Profile Used
Biliary CLint (Hep) (µL/min/106)	0
CV Biliary CLint (Hep) (%)	30
Ontogeny Profile	No Profile Used
Active enterohepatic recirculation for IV dose	No
Active Hepatic Scalar (Net)	1
CL R (L/h)	0
Transport
Organ/Tissue	Tumour
Tumour Permeability limited Model	Off

## Sheet: Ode State Info
Index	Model	State variable name (no PK interaction)
0	0	Substrate liver concentration
1	0	Substrate systemic concentration
2	0	Substrate adipose concentration
3	0	Substrate arterial blood concentration
4	0	Substrate bone concentration
5	0	Substrate brain concentration
6	0	Substrate heart concentration
7	0	Substrate gi tract (tissue) concentration
8	0	Substrate kidney concentration
9	0	Substrate lung concentration
10	0	Substrate muscle concentration
11	0	Substrate spleen concentration
12	0	Substrate skin concentration
13	0	Substrate additional organ concentration
14	0	Substrate pancreas concentration
15	0	Substrate lymph concentration
16	0	Substrate amount in dosed absorption compartment
17	0	Substrate renal amount excreted
18	0	Substrate feto-placental concentration
19	0	CYP2B6 amount in gut
20	0	CYP2B6 amount in colon
21	0	CYP2B6 amount in liver
22	0	CYP2B6 amount in kidney
23	0	CYP2C9 amount in gut
24	0	CYP2C9 amount in colon
25	0	CYP2C9 amount in liver
26	0	CYP2C9 amount in kidney
27	0	UGT1A9 amount in gut
28	0	UGT1A9 amount in colon
29	0	UGT1A9 amount in liver
30	0	UGT1A9 amount in kidney

## Sheet: Sim-Healthy Volunteers
Population		Population : Liver		Population : Kidney		Population : Skin		Population : GI Tract		Population : Lung		Population : Tissue Composition		Population : Blood		Population : Tissue Blood Flow Rates		Population : Brain		Population : Additional Organ		Population : FcRn IgG		Population : Lymph		Population : Target		Population : Tumour		Population : Female Reproductive System
Ref Bodyweight (kg)	80.7056	Liver model	Well Stirred	Male Baseline 1	76.5	MechDermA - Forearm		Dep of Duod. on BSA:C1 Len	0.205	Ventillation-perfusion ratio: Mean	1	Adipose : EW (%)	14.1	Haematocrit Mean : Male	43	Adipose : Male (% of Qc)	5	Brain Volume	User-Defined	Additional Organ : EW (%)	14.1	IgG Concentration (µM)	80.7	% of total lymph flow (Adipose)	12.8	Target1 Name	TNF-alpha	Tumour : Volume (mL)	20	Vagina surface area (cm2)	87.5
Maximum Age (years)	65	Liver weight : Slope vs BSA	0.722	Male Baseline 1 CV (%)	16.1	SCorneum Thickness (µm) : Male	15.7	Dep of Duod. on BSA:Exp Len	0.55	Ventillation-perfusion ratio: CV (%)	35	Adipose : NL (%)	79	Haematocrit CV (%) : Male	6.5	Adipose : Female (% of Qc)	8.5	Male Brain Volume CV%	8.7	Additional Organ : IW (%)	3.9	IgG Concentration CV (%)	12.6	% of total lymph flow (Bone)	0	Target1 Rmax (µM)	4.47e-06	Tumour : CV (%)	30	Vagina surface area CV (%)	9
Minimum Age (years)	18	Operational Concentrations	Liver Compartment (Outlet)	Male Age Cut-Off	61	SCorneum Thickness CV (%) : Male	33	Dep of Duod. on BSA:C1 Dia	0.033	Volume Airway (L): Mean	0.1	Adipose : NP (%)	0.2	Haematocrit Mean : Female	38	Bone : Male (% of Qc)	5	Female Brain Volume CV%	11.9	Additional Organ : NL (%)	79	IgG KD (µM)	0.728	% of total lymph flow (Brain)	1.05	Target1 Rmax CV (%)	30	Tumour : Density (g/mL)	1	Cervix surface area (cm2)	16.9
Propn of Females	0.32	Liver weight : Intcpt vs BSA	1.176	Male Age Cut-off Baseline	81.2	SCorneum Thickness (µm) : Female	15.7	Dep of Duod. on BSA:Exp Dia	0.383	Volume Airway (L): CV (%)	30	Bone : EW (%)	9.8	Haematocrit CV (%) : Female	7.1	Bone : Female (% of Qc)	5	CSF Flow		Additional Organ : NP (%)	0.2	IgG KD CV (%)	10	% of total lymph flow (Stomach and Oesophagus)	12	Target1 Kdeg (1/h)	0.877	Tumour : Weight (g)	20	Cervix surface area CV (%)	21
BSA C1 Param	0.007184	Liver Volume CV (%)	12	Male Age Cut-Off CV1 (%)	27.4	SCorneum Thickness CV (%) : Female	34	Jej-Ileum Ratio:Jej Len	0.4	Volume Alveoli (L): Mean	5.6	Bone : NL (%)	7.4	AGP Mean : Male	0.793	Brain : Male (% of Qc)	12	CSF production rate CV (%)	10	Additional Organ : AP (mg/g)	0.4	IgG KDcomplex (µM)	2.912	% of total lymph flow (Heart)	1	Target1 Kdeg CV (%)	30	Tumour : CV (%)	0	Vagina : cervix surface correlation coefficient	0
BSA Wt Exp	0.425	Liver Volume Prediction Method	Default	Male Age Cut-Off CV2 (%)	21.2	SCorneum Fat (%) : Male	12.9	Enterocyte Volume (L)	0.517	Volume Alveoli (L): CV (%)	10	Bone : NP (%)	0.11	AGP CV (%) : Male	23	Brain : Female (% of Qc)	12	Bulk flow from brain to CSF (% CSF production)	25	Additional Organ : KpALB	0.037	IgG KDcomplex CV (%)	30	% of total lymph flow (Kidney)	8.5	Target1 Kshed (1/hr)	0	Tumour : Blood Flow (mL/min/mL tumour)	0.76	Epithelium thickness (mm)	1
BSA Ht Exp	0.725	Liver Density	1080	Female Baseline 1	57	SCorneum Fat CV (%) : Male	30	Jej-Ileum Ratio:Jej/Duo Dia C1	0.8125	Volume Pulmonary Capilliary Blood (L): Mean	0.089	Brain : EW (%)	9.2	AGP Mean : Female	0.715	Pancreas : Male (% of Qc)	1	Bulk flow from brain to CSF (% CSF production) CV (%)	8	Additional Organ : KpLPP	0.068	IgG CLcat,free (L/h)	0.0175	% of total lymph flow (Liver)	33	Target1 Kshed CV (%)	30	Tumour : CV (%)	30	Epithelium thickness CV (%)	40
HT & WT option	Values	MPPGL : Baseline	1.407	Female Baseline CV (%)	20.4	SCorneum Fat (%) : Female	12.9	Jej-Ileum Ratio:Il/Duo Dia C1	0.725	Volume Pulmonary Capilliary Blood (L): CV (%)	20	Brain : NL (%)	5.1	AGP CV (%) : Female	24	Pancreas : Female (% of Qc)	1	CSF spinal absorption rate (%)	38	Additional Organ : membrane potential : (mV)	-41	IgG CLcat,free CV (%)	10	% of total lymph flow (Lung)	3	Target1 Lambda (1/h)	0	Tumour : Lymph Flow (mL/min/mL of tumour)	0	Stroma thickness (mm)	1.2
Male Body Weight C0	2.643	MPPGL : C1	0.01579	Female Age Cut-Off 1	48	SCorneum Fat CV (%) : Female	30	Dep of LG on BSA :C1	5.231	Volume Epithelial Lining Fluid (L): Mean	0.025	Brain : NP (%)	5.65	HSA C0 : Male	50.34	Stomach : Male (% of Qc)	1	CSF spinal absorption rate CV (%)	30	Additional Organ : subcell membrane potential (mV)	10	Ontogeny Profile	No Profile Used	% of total lymph flow (Muscle)	16	Target2 Name	IgE	Tumour Tissue Type	Generic	Stroma thickness CV (%)	44
Male Body Weight C1	0.0099	MPPGL : C2	-0.0003824	Female Age Cut-Off Baseline 2	66.2	VEpidermis Thickness (µm) : Male	50.7	Dep of LG on BSA :Exp	0.414	Volume Epithelial Lining Fluid(L): CV (%)	20	Gut : EW (%)	26.7	HSA C1 : Male	-0.0575	Stomach : Female (% of Qc)	1	Bulk flow from spinal CSF to cranial CSF (% CSF spinal absorption rate)	90	Additional Organ : subcell pH	5	FcRn Concentration (µM)	40	% of total lymph flow (Pancreas)	0.3	Target2 Rmax (µM)	0.00273	Tumour : EW (%)	32.47	Cervix thickness (mm)	30.2
Male Body Weight CV (%)	15	MPPGL : C3	2.37e-06	Female Age Cut-off 1 CV 1 (%)	26.5	VEpidermis Thickness CV (%) : Male	24	Dep of LG on BSA :CV LG Len	20	Surface Area Airway (m2): Mean	1.5	Gut : NL (%)	4.87	HSA C2 : Male	-0.0738	SI : Male (% of Qc)	10	Bulk flow from spinal CSF to cranial CSF (% CSF spinal absorption rate) CV (%)	100	Additional Organ : IW pH	7	FcRn Coefficient	0.95	% of total lymph flow (Skin)	7.3	Target2 Rmax CV (%)	119	Tumour : IW (%)	53.76	Cervix thickness CV (%)	21
Male Height C0	175.32	MPPGL : CV (%)	26.9	Female Age Cut-off 1 CV 2 (%)	22.8	VEpidermis Thickness (µm) : Female	53.8	S9PPI : input type	Predicted	Surface Area Airway (m2): CV (%)	50	Gut : NP (%)	1.63	HSA CV (%) : Male	10	SI : Female (% of Qc)	11	CSF Volume		Additional Organ Local pH : EW	7.4	Additional Clearance (L/h)	0.0017	% of total lymph flow (Spleen)	1	Target2 Kdeg (1/h)	0.0126	Tumour : NL (%)	0.89	Luminal fluid volume (mL)	0.5
Male Height C1	0.1113	CPPGL : Baseline	28.8945	Female Age Cut-Off 2	78	VEpidermis Thickness CV (%) : Female	19	S9PPI : Mean	5320	Surface Area Alveoli (m2): Mean	140	Heart : EW (%)	31.3	HSA C0 : Female	49.38	Villi : Male (% of Qc)	6	CSF (% Brain volume) : Male	10.5	Additional Organ Local pH : IW	7	Additional Clearance CV (%)	10	% of total lymph flow (Additional Organ)	0	Target2 Kdeg CV (%)	30	Tumour : NP (%)	0.96	Luminal fluid volume CV (%)	30
Male Height C2	-0.0025	CPPGL : Correlation Coefficient	1.31032	Female Age Cut-Off Baseline 3	79.5	VEpidermis Fat (%) : Male	3	MPPI : Mean	2978	Surface Area Alveoli (m2): CV (%)	30	Heart : NL (%)	1.15	HSA C1 : Female	-0.037	Villi : Female (% of Qc)	6	CSF (% Brain volume) : Female	9.2	Additional Organ : subcell fraction (%)	0	Lymphatic Clearance (L/h)	0	Lymph flow rate (L/h/kg)	0.00385518	Target2 Kshed (1/hr)	0	Tumour : AP (mg/g)	2.4	Luminal fluid pH	4.8
Male Height CV (%)	3.9	CPPGL : CV (%)	21.467	Female Age Cut-Off 2 CV 1 (%)	38.3	VEpidermis Fat CV (%) : Male	30	MPPI : CV (%)	30	Lobe Distribution Percentage (%) Ventillation Rate RL	25.9	Heart : NP (%)	1.66	HSA C2 : Female	-0.1286	LI : Male (% of Qc)	4	Spinal (% CSF) : Male	20	Additional Organ : Male (% of Qc)	0.65	Lymphatic Clearance CV (%)	10	Lymph volume (L/kg)	0.00386	Target2 Kshed CV (%)	30	Tumour : KpALB	0.138	Luminal fluid pH CV (%)	18
Female Body Weight C0	2.7383	HPGL : Baseline	3.103	Female Age Cut-Off 2 CV 2 (%)	31.6	VEpidermis Fat (%) : Female	3	CPPI : Mean	2342	Lobe Distribution Percentage (%) Ventillation Rate RM	12.4	Kidney : EW (%)	28.3	HSA CV (%) : Female	10	LI : Female (% of Qc)	5	Spinal (% CSF) : Female	20	Additional Organ : Female (% of Qc)	0.65	Vendothelial (fraction of tissuevolume)	0.005	Lymph volume CV (%)	30	Target2 Lambda (1/h)	0	Tumour : Other Protein (µM)	0	Regional blood flow scalar to vagina	1
Female Body Weight C1	0.0091	HPGL : Age Coefficient	-0.655	Prediction Method	Method 1	VEpidermis Fat CV (%) : Female	30	CPPI : CV (%)	31	Lobe Distribution Percentage (%) Ventillation Rate RT	14.8	Kidney : NL (%)	2.07	Other Mean : Male	0	Heart : Male (% of Qc)	4	Intracranial blood volume (% Brain Volume) : Male	5	Additional Organ % of Body Weight	1	σv (Sigmav)	0.76	Total Plasma Protein (g/100ml)	6.85	Target3 Name	CD11a	Tumour : CV (%)	30	Regional blood flow scalar to vagina CV (%)	0
Female Body Weight CV (%)	18.8	HPGL : CV (%)	41.9	GFR Cap Minimum Defined Population Limit (ml/min/1.73m^2)	90			MPPC : Mean	622	Lobe Distribution Percentage (%) Ventillation Rate LL	32.1	Kidney : NP (%)	1.62	Other CV (%)(%) : Male	0	Heart : Female (% of Qc)	5	Intracranial blood volume (% Brain Volume) : Female	5	Additional Organ % of Body Weight CV (%)	30	σl (Sigmal)	0.2	Total Plasma Protein CV (%)	1.5	Target3 Rmax (µM)	0.01	Tumour : EW pH	7.13	Regional blood flow scalar to cervix	1
Female Height C0	161.66	P450/10e6 Cells : Baseline	3.034	GFR Cap Maximum Defined Population Limit (ml/min/1.73m^2)	400	MechDermA - Upper Arm		MPPC : CV (%)	30	Lobe Distribution Percentage (%) Ventillation Rate LT	14.8	Liver : EW (%)	16.5	Other Mean : Female	0	Kidney : Male (% of Qc)	19	Abundance : ABCB1 (P-gp/MDR1) Mean	1	Additional Organ Density (g/L)	923	Kup (1/h)	0.0298			Target3 Rmax CV (%)	10	Tumour : IW pH	7.26	Regional blood flow scalar to cervix CV (%)	0
Female Height C1	0.1319	P450/10e6 Cells : HPGL Coefficient	-0.506	Ref Value for Males 20~30	130	SCorneum Thickness (µm) : Male	11.9	TMePPI : Mean	2737	Lobe Distribution Percentage (%) Ventillation Rate LA	100	Liver : NL (%)	3.48	Other CV (%)(%) : Female	0	Kidney : Female (% of Qc)	17	Abundance : ABCB1 (P-gp/MDR1) CV (%)	0	Additional Organ Capillary Bed (%)	5	Krc (1/h)	0.548			Target3 Kdeg (1/h)	0.0185	Tumour : Vascular volume fraction	12
Female Height C2	-0.0027	Advanced Bile Model	No	Ref Value for Females 20~30	120	SCorneum Thickness CV (%) : Male	29	TMePPI : CV (%)	0	Lobe Distribution Percentage (%) Ventillation Rate UA	100	Liver : NP (%)	2.52	User-defined Binding Type	User-defined	Liver (Art) : Male (% of Qc)	6.5	Abundance : ABCC4 (MRP4) Mean	1	For neutral (phospho)lipid Partitioning	Using Olive oil-water Partitioning	Krc,complex (1/h)	1.125			Target3 Kdeg CV (%)	10	Tumour : Endosomal volume fraction	5
Female Height CV (%)	3.9	% Hepatic Bile Entering Gallbladder Mean	70.3	Age Limit	140	SCorneum Thickness (µm) : Female	13.9	TMePPC : Mean	112	Lobe Distribution Percentage (%) Blood Flow Rate RL	31.1	Lung : EW (%)	34.8	Ontogeny Profile	No Profile Used	Liver (Art) : Female (% of Qc)	6.5	Abundance : ABCC4 (MRP4) CV (%)	0	Additional Organ : Endothelial Volume (%)	0.35625	FR	0.715			Target3 Kshed (1/hr)	0	Tumour : Interstitial volume fraction	25.63
Male Distribution	User Defined	% Hepatic Bile Entering Gallbladder CV (%)	32.1	Kidney Size Baseline	15.4	SCorneum Thickness CV (%) : Female	28	TMePPC : CV (%)	0	Lobe Distribution Percentage (%) Blood Flow Rate RM	11.8	Lung : NL (%)	0.3	Use Plasma ES Option	Yes	Liver (Port) : Male (% of Qc)	19	Abundance : ABCG2 (BCRP) Mean	1	Additional Organ : Kup (1/h)	0.02979	Adipose σv	0.815			Target3 Kshed CV (%)	30	Tumour Growth Inhibition Model Type	Simeoni Cell Distribution
Frequency of population - 18-21 years	4.5	IMMC Cycle Time Mean (h)	1.55	Kidney Size BW Coeff	2.04	SCorneum Fat (%) : Male	12.9	Use NEWE model for MBI and/or induction of gut CYPs	No	Lobe Distribution Percentage (%) Blood Flow Rate RT	8.6	Lung : NP (%)	0.9	Abundance : Plasma ES EM Mean	1	Liver (Port) : Female (% of Qc)	21.5	Abundance : ABCG2 (BCRP) CV (%)	0	Additional Organ : Krc1 (1/h)	3.605	Bone σv	1			Target3 Lambda (1/h)	0	Tumour : Exponential Growth Rate (1/day)	1
Frequency of population - 21-26 years	39.1	IMMC Cycle Time CV (%)	55	Kidney Size BH Coeff	51.8	SCorneum Fat CV (%) : Male	47	CYP2C9 EM Mean	12.5	Lobe Distribution Percentage (%) Blood Flow Rate LL	34.9	Muscle : EW (%)	9.1	Abundance : Plasma ES EM CV (%)	30	Lung : Male (% of Qc)	100	Abundance : Apical Influx (BBB) Mean	1	Additional Organ : Krc2 (1/h)	7.21	Brain σv	0.998			Target4 Name	Transferrin R	Tumour : CV (%)	0
Frequency of population - 26-31 years	24.72	Fasted Gallbladder Emptied at % IMMC Cycle	30	Kidney Weight CV (%)	23.4	SCorneum Fat (%) : Female	12.9	CYP2C9 EM CV (%)	72	Lobe Distribution Percentage (%) Blood Flow Rate LT	8.6	Muscle : NL (%)	2.38	Abundance : Plasma ES PM Mean	0	Lung : Female (% of Qc)	100	Abundance : Apical Influx (BBB) CV (%)	0	Additional Organ : FR	0.715	Gut σv	0.8			Target4 Rmax (µM)	3.3	Tumour : Linear Growth Rate (g/day)	1
Frequency of population - 31-36 years	11.4	Fasted Gallbladder Release Constant Mean (1/h)	0.18	Kidney Density	1050	SCorneum Fat CV (%) : Female	47	CYP2C9 PM Mean	5	Lobe Distribution Percentage (%) Blood Flow Rate LA	5	Muscle : NP (%)	0.72	Abundance : Plasma ES PM CV (%)	0	Muscle : Male (% of Qc)	17	Abundance : Apical Influx (BCSFB) Mean	1			Heart σv	0.489			Target4 Rmax CV (%)	30	Tumour : CV (%)	0
Frequency of population - 36-41 years	8.63	Fasted Gallbladder Release Constant CV (%)	30	PTCPGK Mean	60	VEpidermis Thickness (µm) : Male	37.1	CYP2C9 PM Mean CV (%)	72	Lobe Distribution Percentage (%) Blood Flow Rate UA	2.5	Pancreas : EW (%)	12	Abundance : Plasma ES UM Mean	0	Muscle : Female (% of Qc)	12	Abundance : Apical Influx (BCSFB) CV (%)	0			Kidney σv	0.726			Target4 Kdeg (1/h)	0.0625	Tumour : Shape Factor	20
Frequency of population - 41-46 years	5.25	Fed Gallbladder Release Constant Mean (1/h)	0.48	PTCPGK CV (%)	30	VEpidermis Thickness CV (%) : Male	51	CYP2C9 UM Mean	0	Lobe Distribution Percentage (%) Alveoli Volume RL	26.3	Pancreas : NL (%)	4.1	Abundance : Plasma ES UM CV (%)	0	Skin : Male (% of Qc)	5	Abundance : Apical Efflux (BCSFB) Mean	1			Liver σv	0.22			Target4 Kdeg CV (%)	30	Tumour : Transit Rate Cell Damage (1/day)	1
Frequency of population - 46-51 years	3	Fed Gallbladder Release Constant CV (%)	19	MPPGK Mean	12.8	VEpidermis Thickness (µm) : Female	45.7	CYP2C9 UM Mean CV (%)	0	Lobe Distribution Percentage (%) Alveoli Volume RM	10.5	Pancreas : NP (%)	0.93	Abundance : Plasma ES IM Mean	0	Skin : Female (% of Qc)	5	Abundance : Apical Efflux (BCSFB) CV (%)	0			Lung σv	0.397			Target4 Kshed (1/hr)	0	Tumour : CV (%)	0
Frequency of population - 51-56 years	1.7	Fasted Gallbladder Residual Volume Mean (%)	79.4	MPPGK CV (%)	55	VEpidermis Thickness CV (%) : Female	62	CYP2C9 IM Mean	0	Lobe Distribution Percentage (%) Alveoli Volume RT	15.8	Skin : EW (%)	62.3	Abundance : Plasma ES IM CV (%)	0	Spleen : Male (% of Qc)	2					Muscle σv	0.875			Target4 Kshed CV (%)	30	Tumour : Number Transit Compartments	3
Frequency of population - 56-61 years	1.05	Fasted Gallbladder Residual Volume CV (%)	13.1	CPPGK Mean	0	VEpidermis Fat (%) : Male	3	CYP2C9 IM Mean CV (%)	0	Lobe Distribution Percentage (%) Alveoli Volume LL	26.3	Skin : NL (%)	2.84			Spleen : Female (% of Qc)	3					Skin σv	0.822			Target4 Lambda (1/h)	0	ABCB1 (P-gp/MDR1) ET Mean	1
Frequency of population - 61-65 years	0.65	Fed Gallbladder Residual Volume Mean (%)	59.9	CPPGK CV (%)	30	VEpidermis Fat CV (%) : Male	30	CYP2C9 Mean Turnover Rate	0.03	Lobe Distribution Percentage (%) Alveoli Volume LT	21.1	Skin : NP (%)	1.11			Cervix : Female (% of Qc)	0.15					Spleen σv	0.2			Target5 Name	Target 5	ABCB1 (P-gp/MDR1) CV (%)	0
Female Distribution	User Defined	Fed Gallbladder Residual Volume CV (%)	39.6	S9 Method	Predicted	VEpidermis Fat (%) : Female	3	CYP2C9 Mean Turnover Rate CV (%)	20	Lobe Distribution Percentage (%) Alveoli Volume LA	50	Spleen : EW (%)	20.8			Vagina : Female (% of Qc)	0.24					Additional Organ σv	0.95			Target5 Rmax (µM)	0	ABCB1 (P-gp/MDR1) PT Mean	1
Frequency of population - 18-21 years	2.98	Enzyme interCorr Switch	Off	S9PPGK Mean	12.8	VEpidermis Fat CV (%) : Female	30	Colon CYP2C9 EM Mean	0	Lobe Distribution Percentage (%) Alveoli Volume UA	50	Spleen : NL (%)	2.01									Pancreas σv	0.5			Target5 Rmax CV (%)	30	ABCB1 (P-gp/MDR1) CV (%)	0
Frequency of population - 21-26 years	44.67	Enzyme Corr Switch	On	UGT1A1 EM Mean	1			Colon CYP2C9 EM CV (%)	0	Lobe Distribution Percentage (%) Absorption Area RL	26.3	Spleen : NP (%)	1.98									Subcutaneous site σv	0.822			Target5 Kdeg (1/h)	0	ABCB1 (P-gp/MDR1) IT Mean	1
Frequency of population - 26-31 years	23.57	Enz Corr C0	62.775	UGT1A1 EM Mean CV (%)	50	MechDermA - Lower Leg		Colon CYP2C9 PM Mean	N/A	Lobe Distribution Percentage (%) Absorption Area RM	10.5	Plasma : EW (%)	94.5									Adipose σl	0.2			Target5 Kdeg CV (%)	30	ABCB1 (P-gp/MDR1) CV (%)	0
Frequency of population - 31-36 years	11.12	Enz Corr C1	0.3934	UGT1A1 PM Mean	0.42	SCorneum Thickness (µm) : Male	16.8	Colon CYP2C9 PM Mean CV (%)	N/A	Lobe Distribution Percentage (%) Absorption Area RT	15.8	Plasma : NL (%)	0.35									Bone σl	0.2			Target5 Kshed (1/hr)	0	ABCB1 (P-gp/MDR1) UT Mean	1
Frequency of population - 36-41 years	6.61	Enz 2 Corr CV	24	UGT1A1 PM Mean CV (%)	50	SCorneum Thickness CV (%) : Male	52	Colon CYP2C9 UM Mean	N/A	Lobe Distribution Percentage (%) Absorption Area LL	26.3	Plasma : NP (%)	0.23									Brain σl	0.2			Target5 Kshed CV (%)	30	ABCB1 (P-gp/MDR1) CV (%)	0
Frequency of population - 41-46 years	5.07	Abundance : CYP1A2 EM Mean	52	UGT1A1 UM Mean	1.46	SCorneum Thickness (µm) : Female	13.9	Colon CYP2C9 UM Mean CV (%)	N/A	Lobe Distribution Percentage (%) Absorption Area LT	21.1	RBC : EW (%)	0									Gut σl	0.2			Target5 Lambda (1/h)	0	ABCG2 (BCRP) ET Mean	1
Frequency of population - 46-51 years	2.42	Abundance : CYP1A2 EM CV (%)	67	UGT1A1 UM Mean CV (%)	50	SCorneum Thickness CV (%) : Female	43	Colon CYP2C9 IM Mean	N/A	Lobe Distribution Percentage (%) Absorption Area LA	50	RBC : NL (%)	0.17									Heart σl	0.2			Target6 Name	Target 6	ABCG2 (BCRP) CV (%)	0
Frequency of population - 51-56 years	1.8	Abundance : CYP1A2 PM Mean	0	UGT1A1 IM Mean	0.72	SCorneum Fat (%) : Male	4.7	Colon CYP2C9 IM Mean CV (%)	N/A	Lobe Distribution Percentage (%) Absorption Area UA	50	RBC : NP (%)	0.29									Kidney σl	0.2			Target6 Rmax (µM)	0	ABCG2 (BCRP) PT Mean	1
Frequency of population - 56-61 years	1.05	Abundance : CYP1A2 PM CV (%)	0	UGT1A1 IM Mean CV (%)	50	SCorneum Fat CV (%) : Male	62	Colon CYP2C9 Mean Turnover Rate	N/A	Lobe Distribution Percentage (%) Pulmonary Capilliary Blood Volume RL	16.66	Adipose : IW (%)	3.9									Liver σl	0.2			Target6 Rmax CV (%)	30	ABCG2 (BCRP) CV (%)	0
Frequency of population - 61-65 years	0.71	Abundance : CYP1A2 UM Mean	0	UGT1A1 Absolute Abundance	6.1	SCorneum Fat (%) : Female	4.7	Colon CYP2C9 Mean Turnover Rate CV (%)	N/A	Lobe Distribution Percentage (%) Pulmonary Capilliary Blood Volume RM	16.67	Adipose : AP (mg/g)	0.4									Lung σl	0.2			Target6 Kdeg (1/h)	0	ABCG2 (BCRP) IT Mean	1
Abundance : CYP1A2 PM Freq	0	Abundance : CYP1A2 UM CV (%)	0	UGT1A1 Mean Turnover Rate	0.0578	SCorneum Fat CV (%) : Female	62	CYP2C19 EM Mean	2	Lobe Distribution Percentage (%) Pulmonary Capilliary Blood Volume RT	16.67	Adipose : KpALB	0.037									Muscle σl	0.2			Target6 Kdeg CV (%)	30	ABCG2 (BCRP) CV (%)	0
Abundance : CYP1A2 UM Freq	0	Abundance : CYP1A2 IM Mean	0	UGT1A1 Mean Turnover Rate CV (%)	30	VEpidermis Thickness (µm) : Male	63.4	CYP2C19 EM CV (%)	77	Lobe Distribution Percentage (%) Pulmonary Capilliary Blood Volume LL	16.67	Adipose : KpLPP	0.068									Skin σl	0.2			Target6 Kshed (1/hr)	0	ABCG2 (BCRP) UT Mean	1
Abundance : CYP1A2 IM Freq	0	Abundance : CYP1A2 IM CV (%)	0	UGT1A3 EM Mean	1	VEpidermis Thickness CV (%) : Male	32	CYP2C19 PM Mean	0	Lobe Distribution Percentage (%) Pulmonary Capilliary Blood Volume LT	16.67	Bone : IW (%)	34.1									Spleen σl	0.2			Target6 Kshed CV (%)	30	ABCG2 (BCRP) CV (%)	0
Abundance : CYP2A6 PM Freq	0	Turnover rate : CYP1A2 Mean	0.0183	UGT1A3 EM Mean CV (%)	50	VEpidermis Thickness (µm) : Female	74.9	CYP2C19 PM Mean CV (%)	0	Lobe Distribution Percentage (%) Pulmonary Capilliary Blood Volume LA	8.33	Bone : AP (mg/g)	0.67									Additional Organ σl	0.2			Target6 Lambda (1/h)	0	Efflux (Tumour) ET Mean	1
Abundance : CYP2A6 UM Freq	0	Turnover rate : CYP1A2 CV (%)	56	UGT1A3 PM Mean	0	VEpidermis Thickness CV (%) : Female	19	CYP2C19 UM Mean	4	Lobe Distribution Percentage (%) Pulmonary Capilliary Blood Volume UA	8.33	Bone : KpALB	0.1									Pancreas σl	0.2			Target7 Name	Target 7	Efflux (Tumour) CV (%)	0
Abundance : CYP2A6 IM Freq	0	Abundance : CYP2A6 EM Mean	20	UGT1A3 PM Mean CV (%)	0	VEpidermis Fat (%) : Male	3	CYP2C19 UM Mean CV (%)	77	Lobe Distribution Percentage (%) Pulmonary Mass Volume RL	16.66	Bone : KpLPP	0.05									Subcutaneous site σl	0.2			Target7 Rmax (µM)	0	Efflux (Tumour) PT Mean	1
Abundance : CYP2B6 PM Freq	0.11	Abundance : CYP2A6 EM CV (%)	173	UGT1A3 UM Mean	0	VEpidermis Fat CV (%) : Male	30	CYP2C19 IM Mean	0	Lobe Distribution Percentage (%) Pulmonary Mass Volume RM	16.67	Brain : IW (%)	67.8									Adipose FR	0			Target7 Rmax CV (%)	30	Efflux (Tumour) CV (%)	0
Abundance : CYP2B6 UM Freq	0	Abundance : CYP2A6 PM Mean	0	UGT1A3 UM Mean CV (%)	0	VEpidermis Fat (%) : Female	3	CYP2C19 IM Mean CV (%)	0	Lobe Distribution Percentage (%) Pulmonary Mass Volume RT	16.67	Brain : AP (mg/g)	0.4									Bone FR	1			Target7 Kdeg (1/h)	0	Efflux (Tumour) IT Mean	1
Abundance : CYP2B6 IM Freq	0	Abundance : CYP2A6 PM CV (%)	0	UGT1A3 IM Mean	0	VEpidermis Fat CV (%) : Female	30	CYP2C19 Mean Turnover Rate	0.03	Lobe Distribution Percentage (%) Pulmonary Mass Volume LL	16.67	Brain : KpALB	0.048									Brain FR	1			Target7 Kdeg CV (%)	30	Efflux (Tumour) CV (%)	0
Abundance : CYP2C8 PM Freq	0	Abundance : CYP2A6 UM Mean	0	UGT1A3 IM Mean CV (%)	0			CYP2C19 Mean Turnover Rate CV (%)	20	Lobe Distribution Percentage (%) Pulmonary Mass Volume LT	16.67	Brain : KpLPP	0.041									Gut FR	1			Target7 Kshed (1/hr)	0	Efflux (Tumour) UT Mean	1
Abundance : CYP2C8 UM Freq	0	Abundance : CYP2A6 UM CV (%)	0	UGT1A3 Absolute Abundance	0	MechDermA - Thigh		Colon CYP2C19 EM Mean	0	Lobe Distribution Percentage (%) Pulmonary Mass Volume LA	8.33	Gut : IW (%)	45.1									Heart FR	1			Target7 Kshed CV (%)	30	Efflux (Tumour) CV (%)	0
Abundance : CYP2C8 IM Freq	0	Abundance : CYP2A6 IM Mean	0	UGT1A3 Mean Turnover Rate	1e-06	SCorneum Thickness (µm) : Male	11	Colon CYP2C19 EM CV (%)	0	Lobe Distribution Percentage (%) Pulmonary Mass Volume UA	8.33	Gut : AP (mg/g)	2.84									Kidney FR	1			Target7 Lambda (1/h)	0	Uptake (Tumour) ET Mean	1
Abundance : CYP2C9 PM Freq	0.06	Abundance : CYP2A6 IM CV (%)	0	UGT1A3 Mean Turnover Rate CV (%)	30	SCorneum Thickness CV (%) : Male	32	Colon CYP2C19 PM Mean	N/A	Lobe Distribution Percentage (%) Epithelial Lining Fluid Volume RL	16.66	Gut : KpALB	0.158									Liver FR	1			Target8 Name	Target 8	Uptake (Tumour) CV (%)	0
Abundance : CYP2C9 UM Freq	0	Turnover rate : CYP2A6 Mean	0.0267	UGT1A4 EM Mean	1	SCorneum Thickness (µm) : Female	11	Colon CYP2C19 PM Mean CV (%)	N/A	Lobe Distribution Percentage (%) Epithelial Lining Fluid Volume RM	16.67	Gut : KpLPP	0.141									Lung FR	1			Target8 Rmax (µM)	0	Uptake (Tumour) PT Mean	1
Abundance : CYP2C9 IM Freq	0	Turnover rate : CYP2A6 CV (%)	56	UGT1A4 EM Mean CV (%)	50	SCorneum Thickness CV (%) : Female	20	Colon CYP2C19 UM Mean	N/A	Lobe Distribution Percentage (%) Epithelial Lining Fluid Volume RT	16.67	Heart : IW (%)	44.5									Muscle FR	0			Target8 Rmax CV (%)	30	Uptake (Tumour) CV (%)	0
Abundance : CYP2C18 PM Freq	0	Abundance : CYP2B6 EM Mean	17	UGT1A4 PM Mean	0	SCorneum Fat (%) : Male	23.7	Colon CYP2C19 UM Mean CV (%)	N/A	Lobe Distribution Percentage (%) Epithelial Lining Fluid Volume LL	16.67	Heart : AP (mg/g)	3.07									Skin FR	0			Target8 Kdeg (1/h)	0	Uptake (Tumour) IT Mean	1
Abundance : CYP2C18 UM Freq	0	Abundance : CYP2B6 EM CV (%)	122	UGT1A4 PM Mean CV (%)	0	SCorneum Fat CV (%) : Male	24	Colon CYP2C19 IM Mean	N/A	Lobe Distribution Percentage (%) Epithelial Lining Fluid Volume LT	16.67	Heart : KpALB	0.157									Spleen FR	1			Target8 Kdeg CV (%)	30	Uptake (Tumour) CV (%)	0
Abundance : CYP2C18 IM Freq	0	Abundance : CYP2B6 PM Mean	6	UGT1A4 UM Mean	0	SCorneum Fat (%) : Female	23.7	Colon CYP2C19 IM Mean CV (%)	N/A	Lobe Distribution Percentage (%) Epithelial Lining Fluid Volume LA	8.33	Heart : KpLPP	0.16									Additional Organ FR	1			Target8 Kshed (1/hr)	0	Uptake (Tumour) UT Mean	1
Abundance : CYP2C19 PM Freq	0.092	Abundance : CYP2B6 PM CV (%)	200	UGT1A4 UM Mean CV (%)	0	SCorneum Fat CV (%) : Female	24	Colon CYP2C19 Mean Turnover Rate	N/A	Lobe Distribution Percentage (%) Epithelial Lining Fluid Volume UA	8.33	Kidney : IW (%)	50									Pancreas FR	1			Target8 Kshed CV (%)	30	Uptake (Tumour) CV (%)	0
Abundance : CYP2C19 UM Freq	0.318	Abundance : CYP2B6 UM Mean	0	UGT1A4 IM Mean	0	VEpidermis Thickness (µm) : Male	53.3	Colon CYP2C19 Mean Turnover Rate CV (%)	N/A	Use local pH by segment	No	Kidney : AP (mg/g)	2.48									Subcutaneous site FR	0			Target8 Lambda (1/h)	0	Tumour : Target Abundance (µM)	0
Abundance : CYP2C19 IM Freq	0	Abundance : CYP2B6 UM CV (%)	0	UGT1A4 IM Mean CV (%)	0	VEpidermis Thickness CV (%) : Male	40	CYP2D6 EM Mean	1.1	Basal Influx 1 (Lung) Mean	1	Kidney : KpALB	0.13									Adipose FcRn	0.93069			Target9 Name	Target 9	Tumour : CV (%)	0
Abundance : CYP2D6 PM Freq	0.082	Abundance : CYP2B6 IM Mean	0	UGT1A4 Absolute Abundance	8.7	VEpidermis Thickness (µm) : Female	43.3	CYP2D6 EM CV (%)	47	Basal Influx 1 (Lung) CV (%)	0	Kidney : KpLPP	0.137									Bone FcRn	2.24581			Target9 Rmax (µM)	0	Tumour : Target MW (Da)	150000
Abundance : CYP2D6 UM Freq	0.053	Abundance : CYP2B6 IM CV (%)	0	UGT1A4 Mean Turnover Rate	1e-06	VEpidermis Thickness CV (%) : Female	40	CYP2D6 PM Mean	0	Basal Influx 2 (Lung) Mean	1	Liver : IW (%)	58.6									Brain FcRn	0.246748			Target9 Rmax CV (%)	30	Tumour : Tissue Radius (µm)	75
Abundance : CYP2D6 IM Freq	0	Turnover rate : CYP2B6 Mean	0.0217	UGT1A4 Mean Turnover Rate CV (%)	30	VEpidermis Fat (%) : Male	3	CYP2D6 PM Mean CV (%)	0	Basal Influx 2 (Lung) CV (%)	0	Liver : AP (mg/g)	5.09									Gut FcRn	1.69464			Target9 Kdeg (1/h)	0	Tumour : CV (%)	30
Abundance : CYP2E1 PM Freq	0	Turnover rate : CYP2B6 CV (%)	56	UGT1A5 EM Mean	1	VEpidermis Fat CV (%) : Male	30	CYP2D6 UM Mean	2.1	Basal Efflux 1 (Lung) Mean	1	Liver : KpALB	0.086									Heart FcRn	0.864965			Target9 Kdeg CV (%)	30	Tumour : Capillary Radius (µm)	8
Abundance : CYP2E1 UM Freq	0	Abundance : CYP2C8 EM Mean	24	UGT1A5 EM Mean CV (%)	50	VEpidermis Fat (%) : Female	3	CYP2D6 UM Mean CV (%)	47	Basal Efflux 1 (Lung) CV (%)	0	Liver : KpLPP	0.161									Kidney FcRn	0.766998			Target9 Kshed (1/hr)	0	Tumour : CV (%)	10
Abundance : CYP2E1 IM Freq	0	Abundance : CYP2C8 EM CV (%)	81	UGT1A5 PM Mean	0	VEpidermis Fat CV (%) : Female	30	CYP2D6 IM Mean	0	Basal Efflux 2 (Lung) Mean	1	Lung : IW (%)	46.3									Liver FcRn	2.40702			Target9 Kshed CV (%)	30	Tumour : Correction Factor	0.63
Abundance : CYP2J2 PM Freq	0	Abundance : CYP2C8 PM Mean	0	UGT1A5 PM Mean CV (%)	0			CYP2D6 IM Mean CV (%)	0	Basal Efflux 2 (Lung) CV (%)	0	Lung : AP (mg/g)	0.5									Lung FcRn	3.04753			Target9 Lambda (1/h)	0	Tumour : CV (%)	0
Abundance : CYP2J2 UM Freq	0	Abundance : CYP2C8 PM CV (%)	0	UGT1A5 UM Mean	0	MechDermA - Face		CYP2D6 Mean Turnover Rate	0.03	Apical Influx 1 (Lung) Mean	1	Lung : KpALB	0.212									Muscle FcRn	0.485806			Target10 Name	Target 10	Tumour : Capillary Small Pore Radius (nm)	4.5
Abundance : CYP2J2 IM Freq	0	Abundance : CYP2C8 UM Mean	0	UGT1A5 UM Mean CV (%)	0	SCorneum Thickness (µm) : Male	14.3	CYP2D6 Mean Turnover Rate CV (%)	20	Apical Influx 1 (Lung) CV (%)	0	Lung : KpLPP	0.168									Skin FcRn	2.96258			Target10 Rmax (µM)	0	Tumour : Capillary Large Pore Radius (nm)	500
Abundance : CYP3A4 PM Freq	0	Abundance : CYP2C8 UM CV (%)	0	UGT1A5 IM Mean	0	SCorneum Thickness CV (%) : Male	23	Colon CYP2D6 EM Mean	0	Apical Influx 2 (Lung) Mean	1	Muscle : IW (%)	66.9									Spleen FcRn	2.24581			Target10 Rmax CV (%)	30	Tumour : Capillary Small Pore Membrane Thickness (1/cm)	17.6
Abundance : CYP3A4 UM Freq	0	Abundance : CYP2C8 IM Mean	0	UGT1A5 IM Mean CV (%)	0	SCorneum Thickness (µm) : Female	15.6	Colon CYP2D6 EM CV (%)	0	Apical Influx 2 (Lung) CV (%)	0	Muscle : AP (mg/g)	2.49									Additional Organ FcRn	1			Target10 Kdeg (1/h)	0	Tumour : Capillary Large Pore Membrane Thickness (1/cm)	0.65
Abundance : CYP3A4 IM Freq	0	Abundance : CYP2C8 IM CV (%)	0	UGT1A5 Absolute Abundance	0	SCorneum Thickness CV (%) : Female	21	Colon CYP2D6 PM Mean	N/A	Apical Efflux 1 (Lung) Mean	1	Muscle : KpALB	0.034									Pancreas FcRn	1.69464			Target10 Kdeg CV (%)	30	Tumour : Capillary Small Pore Hydrolic Conductance	0.01
Abundance : CYP3A5 PM Freq	0.83	Turnover rate : CYP2C8 Mean	0.0301	UGT1A5 Mean Turnover Rate	1e-06	SCorneum Fat (%) : Male	7.2	Colon CYP2D6 PM Mean CV (%)	N/A	Apical Efflux 1 (Lung) CV (%)	0	Muscle : KpLPP	0.059									Subcutaneous site FcRn	2.96258			Target10 Kshed (1/hr)	0	Tumour : Interstitial Small Pore Radius (nm)	13.8
Abundance : CYP3A5 UM Freq	0	Turnover rate : CYP2C8 CV (%)	56	UGT1A5 Mean Turnover Rate CV (%)	30	SCorneum Fat CV (%) : Male	12	Colon CYP2D6 UM Mean	N/A	Apical Efflux 2 (Lung) Mean	1	Skin : IW (%)	9.47									Adipose PS	0			Target10 Kshed CV (%)	30	Tumour : Interstitial Large Pore Radius (nm)	1000
Abundance : CYP3A5 IM Freq	0	Abundance : CYP2C9 EM Mean	73	UGT1A6 EM Mean	1	SCorneum Fat (%) : Female	7.2	Colon CYP2D6 UM Mean CV (%)	N/A	Apical Efflux 2 (Lung) CV (%)	0	Skin : AP (mg/g)	1.32									Bone PS	0.1			Target10 Lambda (1/h)	0	Tumour : Interstitial Small Pore Fraction	0.9
Abundance : CYP3A7 PM Freq	0.88	Abundance : CYP2C9 EM CV (%)	54	UGT1A6 EM Mean CV (%)	50	SCorneum Fat CV (%) : Female	12	Colon CYP2D6 IM Mean	N/A			Skin : KpALB	0.277									Brain PS	0			Target11 Name	Target 11	Tumour : FcRn Abundance Scalar	1
Abundance : CYP3A7 UM Freq	0	Abundance : CYP2C9 PM Mean	29	UGT1A6 PM Mean	0	VEpidermis Thickness (µm) : Male	38.9	Colon CYP2D6 IM Mean CV (%)	N/A	Initial bacteria number	20	Skin : KpLPP	0.096									Gut PS	0			Target11 Rmax (µM)	0
Abundance : CYP3A7 IM Freq	0	Abundance : CYP2C9 PM CV (%)	73	UGT1A6 PM Mean CV (%)	0	VEpidermis Thickness CV (%) : Male	50	Colon CYP2D6 Mean Turnover Rate	N/A			Spleen : IW (%)	57.9									Heart PS	0			Target11 Rmax CV (%)	30
Abundance : CYP2C9 Allele 1 Genotype 1 Freq	0.672	Abundance : CYP2C9 UM Mean	0	UGT1A6 UM Mean	0	VEpidermis Thickness (µm) : Female	37.4	Colon CYP2D6 Mean Turnover Rate CV (%)	N/A	Granuloma growth period (days)	200	Spleen : AP (mg/g)	2.81									Kidney PS	0			Target11 Kdeg (1/h)	0
Abundance : CYP2C9 Allele 1 Genotype 2 Freq	0.186	Abundance : CYP2C9 UM CV (%)	0	UGT1A6 UM Mean CV (%)	0	VEpidermis Thickness CV (%) : Female	21	CYP2J2 EM Mean	7.4			Spleen : KpALB	0.097									Liver PS	0			Target11 Kdeg CV (%)	30
Abundance : CYP2C9 Allele 1 Genotype 3 Freq	0.111	Abundance : CYP2C9 IM Mean	0	UGT1A6 IM Mean	0	VEpidermis Fat (%) : Male	3	CYP2J2 EM CV (%)	69	Granuloma location Frequency: RLM	1	Spleen : KpLPP	0.207									Lung PS	0			Target11 Kshed (1/hr)	0
Abundance : CYP2C9 Allele 1 Genotype 4 Freq	0.011	Abundance : CYP2C9 IM CV (%)	0	UGT1A6 IM Mean CV (%)	0	VEpidermis Fat CV (%) : Male	30	CYP2J2 PM Mean	0	Granuloma location Frequency: RMM	0	Plasma : IW (%)	0									Muscle PS	0			Target11 Kshed CV (%)	30
Abundance : CYP2C9 Allele 1 Genotype 5 Freq	0.017	Turnover rate : CYP2C9 Mean	0.0067	UGT1A6 Absolute Abundance	3.6	VEpidermis Fat (%) : Female	3	CYP2J2 PM Mean CV (%)	0	Granuloma location Frequency: RMM	0	Plasma : AP (mg/g)	0.04									Skin PS	0			Target11 Lambda (1/h)	0
Abundance : CYP2C9 Allele 1 Genotype 6 Freq	0.003	Turnover rate : CYP2C9 CV (%)	56	UGT1A6 Mean Turnover Rate	1e-06	VEpidermis Fat CV (%) : Female	30	CYP2J2 UM Mean	0	Granuloma location Frequency: LLM	0	RBC : IW (%)	66.6									Spleen PS	0			Target12 Name	Target 12
Abundance : UGT1A1 PM Freq	0.11	Abundance : CYP2C18 EM Mean	1	UGT1A6 Mean Turnover Rate CV (%)	30			CYP2J2 UM Mean CV (%)	0	Granuloma location Frequency: LTM	0	RBC : AP (mg/g)	0.44									Additional Organ PS	0			Target12 Rmax (µM)	0
Abundance : UGT1A1 UM Freq	0.01	Abundance : CYP2C18 EM CV (%)	106	UGT1A7 EM Mean	1	MPMLA - Forehead		CYP2J2 IM Mean	0			Pancreas : IW (%)	66.4									Pancreas PS	0			Target12 Rmax CV (%)	30
Abundance : UGT1A1 IM Freq	0.44	Abundance : CYP2C18 PM Mean	0	UGT1A7 EM Mean CV (%)	50	Skin surface pH : Male	4.5	CYP2J2 IM Mean CV (%)	0	Macrophage diameter (μm): Mean	21.2	Pancreas : AP (mg/g)	1.67									Additional Organ PS	0.01			Target12 Kdeg (1/h)	0
Abundance : UGT1A3 PM Freq	0	Abundance : CYP2C18 PM CV (%)	0	UGT1A7 PM Mean	0	Skin surface pH CV (%) : Male	7.4	CYP2J2 Mean Turnover Rate	0.03	Macrophage fraction (%): Mean	50	Pancreas : KpALB	0.06									Subcutaneous site PS	0			Target12 Kdeg CV (%)	30
Abundance : UGT1A3 UM Freq	0	Abundance : CYP2C18 UM Mean	0	UGT1A7 PM Mean CV (%)	0	Skin temperature °C : Male	32	CYP2J2 Mean Turnover Rate CV (%)	20	ISF fraction (%): Mean	10	Pancreas : KpLPP	0.06									Adipose fCLcat	0.05			Target12 Kshed (1/hr)	0
Abundance : UGT1A3 IM Freq	0	Abundance : CYP2C18 UM CV (%)	0	UGT1A7 UM Mean	0	Skin temperature CV (%) : Male	0	Colon CYP2J2 EM Mean	0	ISF fraction: CV (%)	30	Placenta : IW (%)	0									Bone fCLcat	0.05			Target12 Kshed CV (%)	30
Abundance : UGT1A4 PM Freq	0	Abundance : CYP2C18 IM Mean	0	UGT1A7 UM Mean CV (%)	0	Shape of corneocyte : Male	Cuboid (brick)	Colon CYP2J2 EM CV (%)	0	Outer-caseum fraction (%): Mean	20	Placenta : AP (mg/g)	0									Brain fCLcat	0.0009			Target12 Lambda (1/h)	0
Abundance : UGT1A4 UM Freq	0	Abundance : CYP2C18 IM CV (%)	0	UGT1A7 IM Mean	0	Shape of corneocyte : Female	Cuboid (brick)	Colon CYP2J2 PM Mean	N/A	Outer-caseum fraction: CV (%)	30	Placenta : KpALB	0									Gut fCLcat	0.025			Target13 Name	Target 13
Abundance : UGT1A4 IM Freq	0	Turnover rate : CYP2C18 Mean	0.0267	UGT1A7 IM Mean CV (%)	0	Number of SC layers : Male	12	Colon CYP2J2 PM Mean CV (%)	N/A	Inner-caseum fraction (%): Mean	20	Placenta : KpLPP	0									Heart fCLcat	0.0054			Target13 Rmax (µM)	0
Abundance : UGT1A5 PM Freq	0	Turnover rate : CYP2C18 CV (%)	56	UGT1A7 Absolute Abundance	13	Number of SC layers CV (%) : Male	8.4	Colon CYP2J2 UM Mean	N/A	Inner-caseum fraction: CV (%)	30	Adipose Volume Scalar	1									Kidney fCLcat	0.041			Target13 Rmax CV (%)	30
Abundance : UGT1A5 UM Freq	0	Abundance : CYP2C19 EM Mean	4.4	UGT1A7 Mean Turnover Rate	1e-06	Water density gm/cm3 : Male	1	Colon CYP2J2 UM Mean CV (%)	N/A			Bone Volume Scalar	1									Liver fCLcat	0.41			Target13 Kdeg (1/h)	0
Abundance : UGT1A5 IM Freq	0	Abundance : CYP2C19 EM CV (%)	71	UGT1A7 Mean Turnover Rate CV (%)	30	Water density CV (%) : Male	0	Colon CYP2J2 IM Mean	N/A	Local pH: macrophage	5	Brain Volume Scalar	1									Lung fCLcat	0.0057			Target13 Kdeg CV (%)	30
Abundance : UGT1A6 PM Freq	0	Abundance : CYP2C19 PM Mean	0	UGT1A8 EM Mean	1	SC lipids density gm/cm3 : Male	0.9	Colon CYP2J2 IM Mean CV (%)	N/A	Local pH: ISF	6.7	Gut Volume Scalar	1									Muscle fCLcat	0.1			Target13 Kshed (1/hr)	0
Abundance : UGT1A6 UM Freq	0	Abundance : CYP2C19 PM CV (%)	0	UGT1A8 EM Mean CV (%)	50	SC lipids density CV (%) : Male	0	Colon CYP2J2 Mean Turnover Rate	N/A	Local pH: caseum	7.4	Heart Volume Scalar	1									Skin fCLcat	0.27			Target13 Kshed CV (%)	30
Abundance : UGT1A6 IM Freq	0	Abundance : CYP2C19 UM Mean	8.7	UGT1A8 PM Mean	0	SC proteins density gm/cm3 : Male	1.37	Colon CYP2J2 Mean Turnover Rate CV (%)	N/A			Kidney Volume Scalar	1									Spleen fCLcat	0.018			Target13 Lambda (1/h)	0
Abundance : UGT1A7 PM Freq	0	Abundance : CYP2C19 UM CV (%)	71	UGT1A8 PM Mean CV (%)	0	SC proteins density CV (%) : Male	0	CYP3A4 EM Mean	65.4	Uptake (macrophage): Mean	1	Liver Volume Scalar	1									Additional Organ fCLcat	0.01			Target14 Name	Target 14
Abundance : UGT1A7 UM Freq	0	Abundance : CYP2C19 IM Mean	0	UGT1A8 UM Mean	0	Intercellular lipid thickness of SC µm : Male	0.091	CYP3A4 EM CV (%)	52	Uptake (macrophage): CV (%)	1	Lung Volume Scalar	1									Pancreas fCLcat	0.005			Target14 Rmax (µM)	0
Abundance : UGT1A7 IM Freq	0	Abundance : CYP2C19 IM CV (%)	0	UGT1A8 UM Mean CV (%)	0	Intercellular lipid thickness of SC CV (%) : Male	0	CYP3A4 PM Mean	0	Efflux (macrophage): Mean	1	Muscle Volume Scalar	1									Subcutaneous site fCLcat	0.000239			Target14 Rmax CV (%)	30
Abundance : UGT1A8 PM Freq	0	Turnover rate : CYP2C19 Mean	0.0267	UGT1A8 IM Mean	0	Tortuosity : Male	User Defined	CYP3A4 PM Mean CV (%)	0	Efflux (macrophage): CV (%)	0	Skin Volume Scalar	1									Kup Full PBPK (1/h)	0.0298			Target14 Kdeg (1/h)	0
Abundance : UGT1A8 UM Freq	0	Turnover rate : CYP2C19 CV (%)	56	UGT1A8 IM Mean CV (%)	0	Tortuosity of lipid diffusion pathway of SC : Male	12.7	CYP3A4 UM Mean	0	BN pre-treatment number: Mean	80	Spleen Volume Scalar	1									Krc Full PBPK (1/h)	3.605			Target14 Kdeg CV (%)	30
Abundance : UGT1A8 IM Freq	0	Abundance : CYP2D6 EM Mean	9.4	UGT1A8 Absolute Abundance	4.9	Tortuosity of lipid diffusion pathway of SC CV (%) : Male	18	CYP3A4 UM Mean CV (%)	0	BN pre-treatment number: CV (%)	30	Plasma Volume Scalar	1									Krc,complex Full PBPK (1/h)	7.21			Target14 Kshed (1/hr)	0
Abundance : UGT1A9 PM Freq	0.04	Abundance : CYP2D6 EM CV (%)	65	UGT1A8 Mean Turnover Rate	1e-06	Hair follicle diameter µm : Male	65.4	CYP3A4 IM Mean	0			Placenta Volume Scalar	0									Additional Clearance Full PBPK (L/h)	0.0020407			Target14 Kshed CV (%)	30
Abundance : UGT1A9 UM Freq	0	Abundance : CYP2D6 PM Mean	0	UGT1A8 Mean Turnover Rate CV (%)	30	Hair follicle diameter CV (%) : Male	83	CYP3A4 IM Mean CV (%)	0			Membrane potential : Adipose (mV)	-41									Additional Clearance Full PBPK CV (%)	10			Target14 Lambda (1/h)	0
Abundance : UGT1A9 IM Freq	0	Abundance : CYP2D6 PM CV (%)	0	UGT1A9 EM Mean	1	Hair follicle density N/cm2 : Male	292	CYP3A4 Mean Turnover Rate	0.03			Membrane potential : Bone (mV)	-41													Target15 Name	Target 15
Abundance : UGT1A10 PM Freq	0	Abundance : CYP2D6 UM Mean	18.8	UGT1A9 EM Mean CV (%)	50	Hair follicle density CV (%) : Male	16	CYP3A4 Mean Turnover Rate CV (%)	20			Membrane potential : Brain (mV)	-41													Target15 Rmax (µM)	0
Abundance : UGT1A10 UM Freq	0	Abundance : CYP2D6 UM CV (%)	65	UGT1A9 PM Mean	0.07	Hair follicle depth µm : Male	204.8	Colon CYP3A4 EM Mean	1.99			Membrane potential : Gut (mV)	-41													Target15 Rmax CV (%)	30
Abundance : UGT1A10 IM Freq	0	Abundance : CYP2D6 IM Mean	0	UGT1A9 PM Mean CV (%)	50	Hair follicle depth CV (%) : Male	0	Colon CYP3A4 EM CV (%)	30			Membrane potential : Heart (mV)	-41													Target15 Kdeg (1/h)	0
Abundance : UGT2B4 PM Freq	0	Abundance : CYP2D6 IM CV (%)	0	UGT1A9 UM Mean	0	Hair shaft diameter µm : Male	15.9	Colon CYP3A4 PM Mean	N/A			Membrane potential : Kidney (mV)	-70													Target15 Kdeg CV (%)	30
Abundance : UGT2B4 UM Freq	0	Turnover rate : CYP2D6 Mean	0.0099	UGT1A9 UM Mean CV (%)	0	Hair shaft diameter CV (%) : Male	57	Colon CYP3A4 PM Mean CV (%)	N/A			Membrane potential : Liver (mV)	-41													Target15 Kshed (1/hr)	0
Abundance : UGT2B4 IM Freq	0	Turnover rate : CYP2D6 CV (%)	56	UGT1A9 IM Mean	0.19	Sebum viscosity centipose : Male	40	Colon CYP3A4 UM Mean	N/A			Membrane potential : Lung (mV)	-41													Target15 Kshed CV (%)	30
Abundance : UGT2B7 PM Freq	0	Abundance : CYP2E1 EM Mean	61	UGT1A9 IM Mean CV (%)	50	Sebum viscosity CV (%) : Male	0	Colon CYP3A4 UM Mean CV (%)	N/A			Membrane potential : Muscle (mV)	-41													Target15 Lambda (1/h)	0
Abundance : UGT2B7 UM Freq	0	Abundance : CYP2E1 EM CV (%)	61	UGT1A9 Absolute Abundance	79	Corneocyte pH [top] : Male	6.8	Colon CYP3A4 IM Mean	N/A			Membrane potential : Skin (mV)	-41													Target16 Name	Target 16
Abundance : UGT2B7 IM Freq	0	Abundance : CYP2E1 PM Mean	0	UGT1A9 Mean Turnover Rate	1e-06	Corneocyte pH [top] CV (%) : Male	6.8	Colon CYP3A4 IM Mean CV (%)	N/A			Membrane potential : Spleen (mV)	-41													Target16 Rmax (µM)	0
Abundance : UGT2B10 PM Freq	0	Abundance : CYP2E1 PM CV (%)	0	UGT1A9 Mean Turnover Rate CV (%)	30	Corneocyte thickness [top] µm : Male	0.71	Colon CYP3A4 Mean Turnover Rate	N/A			Membrane potential : RBC (mV)	-10													Target16 Rmax CV (%)	30
Abundance : UGT2B10 UM Freq	0	Abundance : CYP2E1 UM Mean	0	UGT1A10 EM Mean	1	Corneocyte thickness [top] CV (%) : Male	36	Colon CYP3A4 Mean Turnover Rate CV (%)	N/A			Membrane potential : Pancreas (mV)	-41													Target16 Kdeg (1/h)	0
Abundance : UGT2B10 IM Freq	0	Abundance : CYP2E1 UM CV (%)	0	UGT1A10 EM Mean CV (%)	50	Corneocyte width [top] µm : Male	27.7	CYP3A5 EM Mean	23.3			Membrane potential : Placenta (mV)	0													Target16 Kdeg CV (%)	30
Abundance : UGT2B11 PM Freq	0	Abundance : CYP2E1 IM Mean	0	UGT1A10 PM Mean	0	Corneocyte width [top] CV (%) : Male	9.2	CYP3A5 EM CV (%)	32			Ve (Fraction Tissue volume) : Lung	0.0050985													Target16 Kshed (1/hr)	0
Abundance : UGT2B11 UM Freq	0	Abundance : CYP2E1 IM CV (%)	0	UGT1A10 PM Mean CV (%)	0	Corneocyte length [top] µm : Male	34.2	CYP3A5 PM Mean	0			Ve (Fraction Tissue volume) : Heart	0.001155													Target16 Kshed CV (%)	30
Abundance : UGT2B11 IM Freq	0	Turnover rate : CYP2E1 Mean	0.0176	UGT1A10 UM Mean	0	Corneocyte length [top] CV (%) : Male	4.1	CYP3A5 PM Mean CV (%)	0			Ve (Fraction Tissue volume) : Brain	0.0025													Target16 Lambda (1/h)	0
Abundance : UGT2B15 PM Freq	0.28	Turnover rate : CYP2E1 CV (%)	63	UGT1A10 UM Mean CV (%)	0	Hydration level (% water volume) [top] : Male	35.5	CYP3A5 UM Mean	0			Ve (Fraction Tissue volume) : Muscle	0.001375													Target17 Name	Target 17
Abundance : UGT2B15 UM Freq	0	Abundance : CYP2J2 EM Mean	1.2	UGT1A10 IM Mean	0	Hydration level (% water volume) [top] CV (%) : Male	17	CYP3A5 UM Mean CV (%)	0			Ve (Fraction Tissue volume) : Skin	0.00275													Target17 Rmax (µM)	0
Abundance : UGT2B15 IM Freq	0.51	Abundance : CYP2J2 EM CV (%)	175	UGT1A10 IM Mean CV (%)	0	SC lipid viscosity [top] centipose : Male	75	CYP3A5 IM Mean	0			Ve (Fraction Tissue volume) : Adipose	0.001925													Target17 Rmax CV (%)	30
Abundance : UGT2B17 PM Freq	0.09	Abundance : CYP2J2 PM Mean	0	UGT1A10 Absolute Abundance	17	SC lipid viscosity [top] CV (%) : Male	0	CYP3A5 IM Mean CV (%)	0			Ve (Fraction Tissue volume) : Bone	0.001375													Target17 Kdeg (1/h)	0
Abundance : UGT2B17 UM Freq	0	Abundance : CYP2J2 PM CV (%)	0	UGT1A10 Mean Turnover Rate	1e-06	Corneocyte pH [upper mid] : Male	6.8	CYP3A5 Mean Turnover Rate	0.03			Ve (Fraction Tissue volume) : Kidney	0.001925													Target17 Kdeg CV (%)	30
Abundance : UGT2B17 IM Freq	0.36	Abundance : CYP2J2 UM Mean	0	UGT1A10 Mean Turnover Rate CV (%)	30	Corneocyte pH [upper mid] CV (%) : Male	6.8	CYP3A5 Mean Turnover Rate CV (%)	20			Ve (Fraction Tissue volume) : ByPass	0													Target17 Kshed (1/hr)	0
Abundance : UGT2B28 PM Freq	0	Abundance : CYP2J2 UM CV (%)	0	UGT2B4 EM Mean	1	Corneocyte thickness [upper mid] µm : Male	0.81	Colon CYP3A5 EM Mean	0.74			Ve (Fraction Tissue volume) : Gut	0.001375													Target17 Kshed CV (%)	30
Abundance : UGT2B28 UM Freq	0	Abundance : CYP2J2 IM Mean	0	UGT2B4 EM Mean CV (%)	50	Corneocyte thickness [upper mid] CV (%) : Male	36	Colon CYP3A5 EM CV (%)	30			Ve (Fraction Tissue volume) : Spleen	0.001375													Target17 Lambda (1/h)	0
Abundance : UGT2B28 IM Freq	0	Abundance : CYP2J2 IM CV (%)	0	UGT2B4 PM Mean	0	Corneocyte width [upper mid] µm : Male	27.7	Colon CYP3A5 PM Mean	N/A			Ve (Fraction Tissue volume) : Pancreas	0.001375													Target18 Name	Target 18
Abundance : User UGT1 PM Freq	0	Turnover rate : CYP2J2 Mean	0.0194	UGT2B4 PM Mean CV (%)	0	Corneocyte width [upper mid] CV (%) : Male	9.2	Colon CYP3A5 PM Mean CV (%)	N/A			Ve (Fraction Tissue volume) : Liver	0.001375													Target18 Rmax (µM)	0
Abundance : User UGT1 UM Freq	0	Turnover rate : CYP2J2 CV (%)	56	UGT2B4 UM Mean	0	Corneocyte length [upper mid] µm : Male	34.2	Colon CYP3A5 UM Mean	N/A			Subcell Membrane potential : Adipose (mV)	10													Target18 Rmax CV (%)	30
Abundance : User UGT1 IM Freq	0	Abundance : CYP3A4 EM Mean	137	UGT2B4 UM Mean CV (%)	0	Corneocyte length [upper mid] CV (%) : Male	4.1	Colon CYP3A5 UM Mean CV (%)	N/A			Subcell Membrane potential : Bone (mV)	10													Target18 Kdeg (1/h)	0
Abundance : User Cyt1 PM Freq	0	Abundance : CYP3A4 EM CV (%)	41	UGT2B4 IM Mean	0	Hydration level (% water volume) [upper mid] : Male	46.1	Colon CYP3A5 IM Mean	N/A			Subcell Membrane potential : Brain (mV)	10													Target18 Kdeg CV (%)	30
Abundance : User Cyt1 UM Freq	0	Abundance : CYP3A4 PM Mean	0	UGT2B4 IM Mean CV (%)	0	Hydration level (% water volume) [upper mid] CV (%) : Male	11	Colon CYP3A5 IM Mean CV (%)	N/A			Subcell Membrane potential : Gut (mV)	10													Target18 Kshed (1/hr)	0
Abundance : User Cyt1 IM Freq	0	Abundance : CYP3A4 PM CV (%)	0	UGT2B4 Absolute Abundance	0.3	SC lipid viscosity [upper mid] centipose : Male	75	Colon CYP3A5 Mean Turnover Rate	N/A			Subcell Membrane potential : Heart (mV)	10													Target18 Kshed CV (%)	30
Abundance : User Cyt2 PM Freq	0	Abundance : CYP3A4 UM Mean	0	UGT2B4 Mean Turnover Rate	1e-06	SC lipid viscosity [upper mid] CV (%) : Male	0	Colon CYP3A5 Mean Turnover Rate CV (%)	N/A			Subcell Membrane potential : Kidney (mV)	10													Target18 Lambda (1/h)	0
Abundance : User Cyt2 UM Freq	0	Abundance : CYP3A4 UM CV (%)	0	UGT2B4 Mean Turnover Rate CV (%)	30	Corneocyte pH [lower mid] : Male	6.8	UGT1A1 EM Mean	1			Subcell Membrane potential : Liver (mV)	10													Target19 Name	Target 19
Abundance : User Cyt2 IM Freq	0	Abundance : CYP3A4 IM Mean	0	UGT2B7 EM Mean	1	Corneocyte pH [lower mid] CV (%) : Male	6.8	UGT1A1 EM Mean CV (%)	60			Subcell Membrane potential : Lung (mV)	10													Target19 Rmax (µM)	0
Abundance : User Cyt3 PM Freq	0	Abundance : CYP3A4 IM CV (%)	0	UGT2B7 EM Mean CV (%)	50	Corneocyte thickness [lower mid] µm : Male	0.91	UGT1A1 PM Mean	0.42			Subcell Membrane potential : Muscle (mV)	10													Target19 Rmax CV (%)	30
Abundance : User Cyt3 UM Freq	0	Turnover rate : CYP3A4 Mean	0.0193	UGT2B7 PM Mean	0	Corneocyte thickness [lower mid] CV (%) : Male	36	UGT1A1 PM Mean CV (%)	60			Subcell Membrane potential : Skin (mV)	10													Target19 Kdeg (1/h)	0
Abundance : User Cyt3 IM Freq	0	Turnover rate : CYP3A4 CV (%)	68	UGT2B7 PM Mean CV (%)	0	Corneocyte width [lower mid] µm : Male	27.7	UGT1A1 UM Mean	1.46			Subcell Membrane potential : Spleen (mV)	10													Target19 Kdeg CV (%)	30
Abundance : User Cyt4 PM Freq	0	Abundance : CYP3A5 EM Mean	103	UGT2B7 UM Mean	0	Corneocyte width [lower mid] CV (%) : Male	9.2	UGT1A1 UM Mean CV (%)	60			Subcell Membrane potential : RBC (mV)	10													Target19 Kshed (1/hr)	0
Abundance : User Cyt4 UM Freq	0	Abundance : CYP3A5 EM CV (%)	65	UGT2B7 UM Mean CV (%)	0	Corneocyte length [lower mid] µm : Male	34.2	UGT1A1 IM Mean	0.72			Subcell Membrane potential : Pancreas (mV)	10													Target19 Kshed CV (%)	30
Abundance : User Cyt4 IM Freq	0	Abundance : CYP3A5 PM Mean	0	UGT2B7 IM Mean	0	Corneocyte length [lower mid] CV (%) : Male	4.1	UGT1A1 IM Mean CV (%)	60			Subcell Membrane potential : Placenta (mV)	0													Target19 Lambda (1/h)	0
Abundance : CES1 PM Freq	0.001	Abundance : CYP3A5 PM CV (%)	0	UGT2B7 IM Mean CV (%)	0	Hydration level (% water volume) [lower mid] : Male	56.75	UGT1A1 Absolute Abundance	8.5			Local pH (IW) : Adipose	7													Target20 Name	Target 20
Abundance : CES1 UM Freq	0	Abundance : CYP3A5 UM Mean	0	UGT2B7 Absolute Abundance	48	Hydration level (% water volume) [lower mid] CV (%) : Male	7	UGT1A3 EM Mean	1			Local pH (IW) : Bone	7													Target20 Rmax (µM)	0
Abundance : CES1 IM Freq	0	Abundance : CYP3A5 UM CV (%)	0	UGT2B7 Mean Turnover Rate	1e-06	SC lipid viscosity [lower mid] centipose : Male	75	UGT1A3 EM Mean CV (%)	60			Local pH (IW) : Brain	7.12													Target20 Rmax CV (%)	30
Abundance : CES2 PM Freq	0	Abundance : CYP3A5 IM Mean	0	UGT2B7 Mean Turnover Rate CV (%)	30	SC lipid viscosity [lower mid] CV (%) : Male	0	UGT1A3 PM Mean	0			Local pH (IW) : Gut	7													Target20 Kdeg (1/h)	0
Abundance : CES2 UM Freq	0	Abundance : CYP3A5 IM CV (%)	0	UGT2B10 EM Mean	1	Corneocyte pH [bottom] : Male	6.8	UGT1A3 PM Mean CV (%)	0			Local pH (IW) : Heart	7													Target20 Kdeg CV (%)	30
Abundance : CES2 IM Freq	0	Turnover rate : CYP3A5 Mean	0.0193	UGT2B10 EM Mean CV (%)	50	Corneocyte pH [bottom] CV (%) : Male	6.8	UGT1A3 UM Mean	0			Local pH (IW) : Kidney	7.2													Target20 Kshed (1/hr)	0
Abundance : User ES PM Freq	0	Turnover rate : CYP3A5 CV (%)	68	UGT2B10 PM Mean	0	Corneocyte thickness [bottom] µm : Male	1.03	UGT1A3 UM Mean CV (%)	0			Local pH (IW) : Liver	7													Target20 Kshed CV (%)	30
Abundance : User ES UM Freq	0	Abundance : CYP3A7 EM Mean	35.4	UGT2B10 PM Mean CV (%)	0	Corneocyte thickness [bottom] CV (%) : Male	36	UGT1A3 IM Mean	0			Local pH (IW) : Lung	6.7													Target20 Lambda (1/h)	0
Abundance : User ES IM Freq	0	Abundance : CYP3A7 EM CV (%)	61	UGT2B10 UM Mean	0	Corneocyte width [bottom] µm : Male	27.7	UGT1A3 IM Mean CV (%)	0			Local pH (IW) : Muscle	7
Abundance : PM Freq	0	Abundance : CYP3A7 PM Mean	0	UGT2B10 UM Mean CV (%)	0	Corneocyte width [bottom] CV (%) : Male	9.2	UGT1A3 Absolute Abundance	0.4			Local pH (IW) : Skin	7
Abundance : UM Freq	0	Abundance : CYP3A7 PM CV (%)	0	UGT2B10 IM Mean	0	Corneocyte length [bottom] µm : Male	34.2	UGT1A4 EM Mean	1			Local pH (IW) : Spleen	7
Abundance : IM Freq	0	Abundance : CYP3A7 UM Mean	0	UGT2B10 IM Mean CV (%)	0	Corneocyte length [bottom] CV (%) : Male	4.1	UGT1A4 EM Mean CV (%)	60			Local pH (IW) : RBC	7.22
Abundance : PM Freq	0	Abundance : CYP3A7 UM CV (%)	0	UGT2B10 Absolute Abundance	0	Hydration level (% water volume) [bottom] : Male	67.4	UGT1A4 PM Mean	0			Local pH (IW) : Pancreas	7
Abundance : UM Freq	0	Abundance : CYP3A7 IM Mean	0	UGT2B10 Mean Turnover Rate	1e-06	Hydration level (% water volume) [bottom] CV (%) : Male	4	UGT1A4 PM Mean CV (%)	0			Local pH (IW) : Placenta	0
Abundance : IM Freq	0	Abundance : CYP3A7 IM CV (%)	0	UGT2B10 Mean Turnover Rate CV (%)	30	SC lipid viscosity [bottom] centipose : Male	75	UGT1A4 UM Mean	0			Subcell pH : Adipose	5
Abundance : Plasma ES PM Freq	0	Turnover rate : CYP3A7 Mean	0.019	UGT2B11 EM Mean	1	SC lipid viscosity [bottom] CV (%) : Male	0	UGT1A4 UM Mean CV (%)	0			Subcell pH : Bone	5
Abundance : Plasma ES UM Freq	0	Turnover rate : CYP3A7 CV (%)	68	UGT2B11 EM Mean CV (%)	50	Viable Epidermis thickness µm : Male	50.05	UGT1A4 IM Mean	0			Subcell pH : Brain	5
Abundance : Plasma ES IM Freq	0	3A4 M / F difference	Same	UGT2B11 PM Mean	0	Viable Epidermis thickness CV (%) : Male	7	UGT1A4 IM Mean CV (%)	0			Subcell pH : Gut	5
Abundance : FMO1 PM Freq	0	Abundance : 3A4 Mean : Male	137	UGT2B11 PM Mean CV (%)	0	Dermis thickness µm : Male	1250	UGT1A4 Absolute Abundance	1.9			Subcell pH : Heart	5
Abundance : FMO1 UM Freq	0	Abundance : 3A4 CV (%) : Male	41	UGT2B11 UM Mean	0	Dermis thickness CV (%) : Male	45	UGT1A5 EM Mean	1			Subcell pH : Kidney	5
Abundance : FMO1 IM Freq	0	Abundance : 3A4 Mean : Female	137	UGT2B11 UM Mean CV (%)	0	Subcutis thickness mm : Male	1.91	UGT1A5 EM Mean CV (%)	60			Subcell pH : Liver	5
Abundance : FMO3 PM Freq	0	Abundance : 3A4 CV (%) : Female	41	UGT2B11 IM Mean	0	Subcutis thickness CV (%) : Male	55.7	UGT1A5 PM Mean	0			Subcell pH : Lung	5
Abundance : FMO3 UM Freq	0	Abundance : CYP2C9 Allele 1 Genotype 1 Mean	83.4	UGT2B11 IM Mean CV (%)	0	Muscle thickness mm : Male	1.46	UGT1A5 PM Mean CV (%)	0			Subcell pH : Muscle	5
Abundance : FMO3 IM Freq	0	Abundance : CYP2C9 Allele 1 Genotype 1 CV (%)	60.5	UGT2B11 Absolute Abundance	0	Muscle thickness CV (%) : Male	2.74	UGT1A5 UM Mean	0			Subcell pH : Skin	5
Abundance : FMO5 PM Freq	0	Turnover rate : CYP2C9 Allele 1 Genotype 1 Mean	0.0067	UGT2B11 Mean Turnover Rate	1e-06	Dermis regional blood flow scalar : Male	2.13	UGT1A5 UM Mean CV (%)	0			Subcell pH : Spleen	5
Abundance : FMO5 UM Freq	0	Turnover rate : CYP2C9 Allele 1 Genotype 1 CV (%)	56	UGT2B11 Mean Turnover Rate CV (%)	30	Dermis regional blood flow scalar CV (%) : Male	0	UGT1A5 IM Mean	0			Subcell pH : RBC	5
Abundance : FMO5 IM Freq	0	Abundance : CYP2C9 Allele 1 Genotype 2 Mean	75.8	UGT2B15 EM Mean	1	Subcutis regional blood flow scalar : Male	1	UGT1A5 IM Mean CV (%)	0			Subcell pH : Pancreas	5
Abundance : FMOUser PM Freq	0	Abundance : CYP2C9 Allele 1 Genotype 2 CV (%)	63.8	UGT2B15 EM Mean CV (%)	50	Subcutis regional blood flow scalar CV (%) : Male	0	UGT1A5 Absolute Abundance	0.3			Subcell pH : Placenta	0
Abundance : FMOUser UM Freq	0	Turnover rate : CYP2C9 Allele 1 Genotype 2 Mean	0.0067	UGT2B15 PM Mean	0.07	Muscle regional blood flow scalar : Male	1	UGT1A6 EM Mean	1			Local pH : Plasma	7.4
Abundance : FMOUser IM Freq	0	Turnover rate : CYP2C9 Allele 1 Genotype 2 CV (%)	56	UGT2B15 PM Mean CV (%)	50	Muscle regional blood flow scalar CV (%) : Male	0	UGT1A6 EM Mean CV (%)	60			Local pH : EW	7.4
Abundance : ABCB1 (P-gp/MDR1) PT Freq	0	Abundance : CYP2C9 Allele 1 Genotype 3 Mean	75.8	UGT2B15 UM Mean	0			UGT1A6 PM Mean	0			Local pH : Generic IW	7
Abundance : ABCB1 (P-gp/MDR1) IT Freq	0	Abundance : CYP2C9 Allele 1 Genotype 3 CV (%)	63.8	UGT2B15 UM Mean CV (%)	0	MPMLA - Forearm Inner (volar)		UGT1A6 PM Mean CV (%)	0			Local pH : Gut ISF	7.23
Abundance : ABCB1 (P-gp/MDR1) UT Freq	0	Turnover rate : CYP2C9 Allele 1 Genotype 3 Mean	0.0067	UGT2B15 IM Mean	0.47	Skin surface pH : Male	4.5	UGT1A6 UM Mean	0			Local pH : CSF	7.31
Abundance : ABCB11 (BSEP) PT Freq	0	Turnover rate : CYP2C9 Allele 1 Genotype 3 CV (%)	56	UGT2B15 IM Mean CV (%)	50	Skin surface pH CV (%) : Male	8.2	UGT1A6 UM Mean CV (%)	0			Local pH : Pulmonary Fluid	6.6
Abundance : ABCB11 (BSEP) IT Freq	0	Abundance : CYP2C9 Allele 1 Genotype 4 Mean	75.8	UGT2B15 Absolute Abundance	0.2	Skin temperature °C : Male	32	UGT1A6 IM Mean	0			Subcell fraction : Adipose(%)	0
Abundance : ABCB11 (BSEP) UT Freq	0	Abundance : CYP2C9 Allele 1 Genotype 4 CV (%)	63.8	UGT2B15 Mean Turnover Rate	1e-06	Skin temperature CV (%) : Male	0	UGT1A6 IM Mean CV (%)	0			Subcell fraction : Bone(%)	0
Abundance : ABCC1 (MRP1) PT Freq	0	Turnover rate : CYP2C9 Allele 1 Genotype 4 Mean	0.0067	UGT2B15 Mean Turnover Rate CV (%)	30	Shape of corneocyte : Male	Cuboid (brick)	UGT1A6 Absolute Abundance	1.3			Subcell fraction : Brain(%)	0
Abundance : ABCC1 (MRP1) IT Freq	0	Turnover rate : CYP2C9 Allele 1 Genotype 4 CV (%)	56	UGT2B17 EM Mean	1	Shape of corneocyte : Female	Cuboid (brick)	UGT1A7 EM Mean	1			Subcell fraction : Gut(%)	0
Abundance : ABCC1 (MRP1) UT Freq	0	Abundance : CYP2C9 Allele 1 Genotype 5 Mean	75.8	UGT2B17 EM Mean CV (%)	50	Number of SC layers : Male	22	UGT1A7 EM Mean CV (%)	60			Subcell fraction : Heart(%)	0
Abundance : ABCC2 (MRP2) PT Freq	0	Abundance : CYP2C9 Allele 1 Genotype 5 CV (%)	63.8	UGT2B17 PM Mean	0.08	Number of SC layers CV (%) : Male	14	UGT1A7 PM Mean	0			Subcell fraction : Kidney(%)	1
Abundance : ABCC2 (MRP2) IT Freq	0	Turnover rate : CYP2C9 Allele 1 Genotype 5 Mean	0.0067	UGT2B17 PM Mean CV (%)	50	Water density gm/cm3 : Male	1	UGT1A7 PM Mean CV (%)	0			Subcell fraction : Liver(%)	1
Abundance : ABCC2 (MRP2) UT Freq	0	Turnover rate : CYP2C9 Allele 1 Genotype 5 CV (%)	56	UGT2B17 UM Mean	0	Water density CV (%) : Male	0	UGT1A7 UM Mean	0			Subcell fraction : Lung(%)	1
Abundance : ABCC3 (MRP3) PT Freq	0	Abundance : CYP2C9 Allele 1 Genotype 6 Mean	23	UGT2B17 UM Mean CV (%)	0	SC lipids density gm/cm3 : Male	0.9	UGT1A7 UM Mean CV (%)	0			Subcell fraction : Muscle(%)	0
Abundance : ABCC3 (MRP3) IT Freq	0	Abundance : CYP2C9 Allele 1 Genotype 6 CV (%)	60	UGT2B17 IM Mean	0.16	SC lipids density CV (%) : Male	0	UGT1A7 IM Mean	0			Subcell fraction : Skin(%)	0
Abundance : ABCC3 (MRP3) UT Freq	0	Turnover rate : CYP2C9 Allele 1 Genotype 6 Mean	0.0067	UGT2B17 IM Mean CV (%)	50	SC proteins density gm/cm3 : Male	1.37	UGT1A7 IM Mean CV (%)	0			Subcell fraction : Spleen(%)	0
Abundance : ABCC4 (MRP4) PT Freq	0	Turnover rate : CYP2C9 Allele 1 Genotype 6 CV (%)	56	UGT2B17 Absolute Abundance	0	SC proteins density CV (%) : Male	0	UGT1A7 Absolute Abundance	7.1			Subcell fraction : Pancreas(%)	0
Abundance : ABCC4 (MRP4) IT Freq	0	Abundance : UGT1A1 EM Mean	1	UGT2B17 Mean Turnover Rate	1e-06	Intercellular lipid thickness of SC µm : Male	0.091	UGT1A8 EM Mean	1			Subcell fraction : Placenta(%)	0
Abundance : ABCC4 (MRP4) UT Freq	0	Abundance : UGT1A1 EM CV (%)	24	UGT2B17 Mean Turnover Rate CV (%)	30	Intercellular lipid thickness of SC CV (%) : Male	0	UGT1A8 EM Mean CV (%)	60			Liver model	PerMCL
Abundance : ABCC6 (MRP6) PT Freq	0	Abundance : UGT1A1 PM Mean	0.42	UGT2B28 EM Mean	1	Tortuosity : Male	User Defined	UGT1A8 PM Mean	0			Liver : 1 VS (%)	5
Abundance : ABCC6 (MRP6) IT Freq	0	Abundance : UGT1A1 PM CV (%)	50.8	UGT2B28 EM Mean CV (%)	50	Tortuosity of lipid diffusion pathway of SC : Male	12.7	UGT1A8 PM Mean CV (%)	0			Liver : 1 EW (%)	16.5
Abundance : ABCC6 (MRP6) UT Freq	0	Abundance : UGT1A1 UM Mean	1.46	UGT2B28 PM Mean	0	Tortuosity of lipid diffusion pathway of SC CV (%) : Male	18	UGT1A8 UM Mean	0			Liver : 1 NL (%)	3.48
Abundance : ABCG2 (BCRP) PT Freq	0.02	Abundance : UGT1A1 UM CV (%)	30	UGT2B28 PM Mean CV (%)	0	Hair follicle diameter µm : Male	77.7	UGT1A8 UM Mean CV (%)	0			Liver : 1 NP (%)	2.52
Abundance : ABCG2 (BCRP) IT Freq	0.17	Abundance : UGT1A1 IM Mean	0.72	UGT2B28 UM Mean	0	Hair follicle diameter CV (%) : Male	32	UGT1A8 IM Mean	0			Liver : 1 IW (%)	58.6
Abundance : ABCG2 (BCRP) UT Freq	0	Abundance : UGT1A1 IM CV (%)	39.9	UGT2B28 UM Mean CV (%)	0	Hair follicle density N/cm2 : Male	18	UGT1A8 IM Mean CV (%)	0			Liver : 1 AP (mg/g)	5.09
Abundance : SLC2A2 (GLUT2) PT Freq	0	Absolute Abundance : UGT1A1	48	UGT2B28 IM Mean	0	Hair follicle density CV (%) : Male	39	UGT1A8 Absolute Abundance	5.6			Liver : 1 KpALB	0.086
Abundance : SLC2A2 (GLUT2) IT Freq	0	Turnover rate : UGT1A1 Mean	0.0578	UGT2B28 IM Mean CV (%)	0	Hair follicle depth µm : Male	109.5	UGT1A9 EM Mean	1			Liver : 1 KpLPP	0.161
Abundance : SLC2A2 (GLUT2) UT Freq	0	Turnover rate : UGT1A1 CV (%)	30	UGT2B28 Absolute Abundance	0	Hair follicle depth CV (%) : Male	0	UGT1A9 EM Mean CV (%)	60			Liver : 1 Local pH (IW)	7
Abundance : SLC10A1 (NTCP) PT Freq	0	Abundance : UGT1A3 EM Mean	1	UGT2B28 Mean Turnover Rate	1e-06	Hair shaft diameter µm : Male	18	UGT1A9 PM Mean	0.07			Liver : 1 Local pH (EW)	7.4
Abundance : SLC10A1 (NTCP) IT Freq	0	Abundance : UGT1A3 EM CV (%)	36	UGT2B28 Mean Turnover Rate CV (%)	30	Hair shaft diameter CV (%) : Male	34	UGT1A9 PM Mean CV (%)	60			Liver : 2 VS (%)	5
Abundance : SLC10A1 (NTCP) UT Freq	0	Abundance : UGT1A3 PM Mean	0	Use User UGT Option	Yes	Sebum viscosity centipose : Male	40	UGT1A9 UM Mean	0			Liver : 2 EW (%)	16.5
Abundance : SLC10A2 (ASBT/IBAT) PT Freq	0	Abundance : UGT1A3 PM CV (%)	0	UGT User	1	Sebum viscosity CV (%) : Male	0	UGT1A9 UM Mean CV (%)	0			Liver : 2 NL (%)	3.48
Abundance : SLC10A2 (ASBT/IBAT) IT Freq	0	Abundance : UGT1A3 UM Mean	0	User UGT1 EM Mean	1	Corneocyte pH [top] : Male	6.8	UGT1A9 IM Mean	0.19			Liver : 2 NP (%)	2.52
Abundance : SLC10A2 (ASBT/IBAT) UT Freq	0	Abundance : UGT1A3 UM CV (%)	0	User UGT1 EM Mean CV (%)	50	Corneocyte pH [top] CV (%) : Male	6.8	UGT1A9 IM Mean CV (%)	60			Liver : 2 IW (%)	58.6
Abundance : SLC15A1 (PEPT1) PT Freq	0	Abundance : UGT1A3 IM Mean	0	User UGT1 PM Mean	0	Corneocyte thickness [top] µm : Male	0.59	UGT1A9 Absolute Abundance	5.9			Liver : 2 AP (mg/g)	5.09
Abundance : SLC15A1 (PEPT1) IT Freq	0	Abundance : UGT1A3 IM CV (%)	0	User UGT1 PM Mean CV (%)	0	Corneocyte thickness [top] CV (%) : Male	22	UGT1A10 EM Mean	1			Liver : 2 KpALB	0.086
Abundance : SLC15A1 (PEPT1) UT Freq	0	Absolute Abundance : UGT1A3	23	User UGT1 UM Mean	0	Corneocyte width [top] µm : Male	29.6	UGT1A10 EM Mean CV (%)	60			Liver : 2 KpLPP	0.161
Abundance : SLC16A1 (MCT1) PT Freq	0	Turnover rate : UGT1A3 Mean	1e-06	User UGT1 UM Mean CV (%)	0	Corneocyte width [top] CV (%) : Male	5.9	UGT1A10 PM Mean	0			Liver : 2 Local pH (IW)	7
Abundance : SLC16A1 (MCT1) IT Freq	0	Turnover rate : UGT1A3 CV (%)	30	User UGT1 IM Mean	0	Corneocyte length [top] µm : Male	36.4	UGT1A10 PM Mean CV (%)	0			Liver : 2 Local pH (EW)	7.4
Abundance : SLC16A1 (MCT1) UT Freq	0	Abundance : UGT1A4 EM Mean	1	User UGT1 IM Mean CV (%)	0	Corneocyte length [top] CV (%) : Male	5.7	UGT1A10 UM Mean	0			Liver : 3 VS (%)	5
Abundance : SLCO1B1 (OATP1B1) PT Freq	0.03	Abundance : UGT1A4 EM CV (%)	26	User UGT1 Absolute Abundance	0	Hydration level (% water volume) [top] : Male	33.9	UGT1A10 UM Mean CV (%)	0			Liver : 3 EW (%)	16.5
Abundance : SLCO1B1 (OATP1B1) IT Freq	0.27	Abundance : UGT1A4 PM Mean	0	User UGT1 Mean Turnover Rate	1e-06	Hydration level (% water volume) [top] CV (%) : Male	9	UGT1A10 IM Mean	0			Liver : 3 NL (%)	3.48
Abundance : SLCO1B1 (OATP1B1) UT Freq	0.07	Abundance : UGT1A4 PM CV (%)	0	User UGT1 Mean Turnover Rate CV (%)	30	SC lipid viscosity [top] centipose : Male	75	UGT1A10 IM Mean CV (%)	0			Liver : 3 NP (%)	2.52
Abundance : SLCO1B3 (OATP1B3) PT Freq	0	Abundance : UGT1A4 UM Mean	0	Use User Cytosolic Enzyme Option	Yes	SC lipid viscosity [top] CV (%) : Male	0	UGT1A10 Absolute Abundance	4.3			Liver : 3 IW (%)	58.6
Abundance : SLCO1B3 (OATP1B3) IT Freq	0	Abundance : UGT1A4 UM CV (%)	0	User Cyt	1	Corneocyte pH [upper mid] : Male	6.8	UGT2B4 EM Mean	1			Liver : 3 AP (mg/g)	5.09
Abundance : SLCO1B3 (OATP1B3) UT Freq	0	Abundance : UGT1A4 IM Mean	0	User Cyt1 EM Mean	1	Corneocyte pH [upper mid] CV (%) : Male	6.8	UGT2B4 EM Mean CV (%)	60			Liver : 3 KpALB	0.086
Abundance : SLCO2B1 (OATP2B1) PT Freq	0	Abundance : UGT1A4 IM CV (%)	0	User Cyt1 EM Mean CV (%)	30	Corneocyte thickness [upper mid] µm : Male	0.67	UGT2B4 PM Mean	0			Liver : 3 KpLPP	0.161
Abundance : SLCO2B1 (OATP2B1) IT Freq	0	Absolute Abundance : UGT1A4	52	User Cyt1 PM Mean	0	Corneocyte thickness [upper mid] CV (%) : Male	22	UGT2B4 PM Mean CV (%)	0			Liver : 3 Local pH (IW)	7
Abundance : SLCO2B1 (OATP2B1) UT Freq	0	Turnover rate : UGT1A4 Mean	1e-06	User Cyt1 PM Mean CV (%)	0	Corneocyte width [upper mid] µm : Male	29.6	UGT2B4 UM Mean	0			Liver : 3 Local pH (EW)	7.4
Abundance : SLCO4C1 (OATP4C1) PT Freq	0	Turnover rate : UGT1A4 CV (%)	30	User Cyt1 UM Mean	0	Corneocyte width [upper mid] CV (%) : Male	5.9	UGT2B4 UM Mean CV (%)	0			Liver : 4 VS (%)	5
Abundance : SLCO4C1 (OATP4C1) IT Freq	0	Abundance : UGT1A5 EM Mean	1	User Cyt1 UM Mean CV (%)	0	Corneocyte length [upper mid] µm : Male	36.4	UGT2B4 IM Mean	0			Liver : 4 EW (%)	16.5
Abundance : SLCO4C1 (OATP4C1) UT Freq	0	Abundance : UGT1A5 EM CV (%)	30	User Cyt1 IM Mean	0	Corneocyte length [upper mid] CV (%) : Male	5.7	UGT2B4 IM Mean CV (%)	0			Liver : 4 NL (%)	3.48
Abundance : SLC22A1 (OCT1) PT Freq	0.0549	Abundance : UGT1A5 PM Mean	0	User Cyt1 IM Mean CV (%)	0	Hydration level (% water volume) [upper mid] : Male	44.6987	UGT2B4 Absolute Abundance	0			Liver : 4 NP (%)	2.52
Abundance : SLC22A1 (OCT1) IT Freq	0.4043	Abundance : UGT1A5 PM CV (%)	0	Use User Cytosolic Enzyme Option	Yes	Hydration level (% water volume) [upper mid] CV (%) : Male	6	UGT2B7 EM Mean	1			Liver : 4 IW (%)	58.6
Abundance : SLC22A1 (OCT1) UT Freq	0.0004	Abundance : UGT1A5 UM Mean	0	User Cyt	2	SC lipid viscosity [upper mid] centipose : Male	75	UGT2B7 EM Mean CV (%)	60			Liver : 4 AP (mg/g)	5.09
Abundance : SLC22A2 (OCT2) PT Freq	0	Abundance : UGT1A5 UM CV (%)	0	User Cyt2 EM Mean	1	SC lipid viscosity [upper mid] CV (%) : Male	0	UGT2B7 PM Mean	0			Liver : 4 KpALB	0.086
Abundance : SLC22A2 (OCT2) IT Freq	0	Abundance : UGT1A5 IM Mean	0	User Cyt2 EM Mean CV (%)	30	Corneocyte pH [lower mid] : Male	6.8	UGT2B7 PM Mean CV (%)	0			Liver : 4 KpLPP	0.161
Abundance : SLC22A2 (OCT2) UT Freq	0	Abundance : UGT1A5 IM CV (%)	0	User Cyt2 PM Mean	0	Corneocyte pH [lower mid] CV (%) : Male	6.8	UGT2B7 UM Mean	0			Liver : 4 Local pH (IW)	7
Abundance : SLC22A3 (OCT3) PT Freq	0	Absolute Abundance : UGT1A5	0	User Cyt2 PM Mean CV (%)	0	Corneocyte thickness [lower mid] µm : Male	0.76	UGT2B7 UM Mean CV (%)	0			Liver : 4 Local pH (EW)	7.4
Abundance : SLC22A3 (OCT3) IT Freq	0	Turnover rate : UGT1A5 Mean	1e-06	User Cyt2 UM Mean	0	Corneocyte thickness [lower mid] CV (%) : Male	22	UGT2B7 IM Mean	0			Liver : 5 VS (%)	5
Abundance : SLC22A3 (OCT3) UT Freq	0	Turnover rate : UGT1A5 CV (%)	30	User Cyt2 UM Mean CV (%)	0	Corneocyte width [lower mid] µm : Male	29.6	UGT2B7 IM Mean CV (%)	0			Liver : 5 EW (%)	16.5
Abundance : SLC22A4 (OCTN1) PT Freq	0	Abundance : UGT1A6 EM Mean	1	User Cyt2 IM Mean	0	Corneocyte width [lower mid] CV (%) : Male	5.9	UGT2B7 Absolute Abundance	4.5			Liver : 5 NL (%)	3.48
Abundance : SLC22A4 (OCTN1) IT Freq	0	Abundance : UGT1A6 EM CV (%)	30	User Cyt2 IM Mean CV (%)	0	Corneocyte length [lower mid] µm : Male	36.4	UGT2B10 EM Mean	1			Liver : 5 NP (%)	2.52
Abundance : SLC22A4 (OCTN1) UT Freq	0	Abundance : UGT1A6 PM Mean	0	Use User Cytosolic Enzyme Option	Yes	Corneocyte length [lower mid] CV (%) : Male	5.7	UGT2B10 EM Mean CV (%)	60			Liver : 5 IW (%)	58.6
Abundance : SLC22A6 (OAT1) PT Freq	0	Abundance : UGT1A6 PM CV (%)	0	User Cyt	3	Hydration level (% water volume) [lower mid] : Male	55.5388	UGT2B10 PM Mean	0			Liver : 5 AP (mg/g)	5.09
Abundance : SLC22A6 (OAT1) IT Freq	0	Abundance : UGT1A6 UM Mean	0	User Cyt3 EM Mean	1	Hydration level (% water volume) [lower mid] CV (%) : Male	5	UGT2B10 PM Mean CV (%)	0			Liver : 5 KpALB	0.086
Abundance : SLC22A6 (OAT1) UT Freq	0	Abundance : UGT1A6 UM CV (%)	0	User Cyt3 EM Mean CV (%)	30	SC lipid viscosity [lower mid] centipose : Male	75	UGT2B10 UM Mean	0			Liver : 5 KpLPP	0.161
Abundance : SLC22A7 (OAT2) PT Freq	0	Abundance : UGT1A6 IM Mean	0	User Cyt3 PM Mean	0	SC lipid viscosity [lower mid] CV (%) : Male	0	UGT2B10 UM Mean CV (%)	0			Liver : 5 Local pH (IW)	7
Abundance : SLC22A7 (OAT2) IT Freq	0	Abundance : UGT1A6 IM CV (%)	0	User Cyt3 PM Mean CV (%)	0	Corneocyte pH [bottom] : Male	6.8	UGT2B10 IM Mean	0			Liver : 5 Local pH (EW)	7.4
Abundance : SLC22A7 (OAT2) UT Freq	0	Absolute Abundance : UGT1A6	20	User Cyt3 UM Mean	0	Corneocyte pH [bottom] CV (%) : Male	6.8	UGT2B10 IM Mean CV (%)	0			Liver : 6 VS (%)	5
Abundance : SLC22A8 (OAT3) PT Freq	0	Turnover rate : UGT1A6 Mean	1e-06	User Cyt3 UM Mean CV (%)	0	Corneocyte thickness [bottom] µm : Male	0.86	UGT2B10 Absolute Abundance	0.1			Liver : 6 EW (%)	16.5
Abundance : SLC22A8 (OAT3) IT Freq	0	Turnover rate : UGT1A6 CV (%)	30	User Cyt3 IM Mean	0	Corneocyte thickness [bottom] CV (%) : Male	22	UGT2B11 EM Mean	1			Liver : 6 NL (%)	3.48
Abundance : SLC22A8 (OAT3) UT Freq	0	Abundance : UGT1A7 EM Mean	1	User Cyt3 IM Mean CV (%)	0	Corneocyte width [bottom] µm : Male	29.6	UGT2B11 EM Mean CV (%)	60			Liver : 6 NP (%)	2.52
Abundance : SLC22A9 (OAT7) PT Freq	0	Abundance : UGT1A7 EM CV (%)	30	Use User Cytosolic Enzyme Option	Yes	Corneocyte width [bottom] CV (%) : Male	5.9	UGT2B11 PM Mean	0			Liver : 6 IW (%)	58.6
Abundance : SLC22A9 (OAT7) IT Freq	0	Abundance : UGT1A7 PM Mean	0	User Cyt	4	Corneocyte length [bottom] µm : Male	36.4	UGT2B11 PM Mean CV (%)	0			Liver : 6 AP (mg/g)	5.09
Abundance : SLC22A9 (OAT7) UT Freq	0	Abundance : UGT1A7 PM CV (%)	0	User Cyt4 EM Mean	1	Corneocyte length [bottom] CV (%) : Male	5.7	UGT2B11 UM Mean	0			Liver : 6 KpALB	0.086
Abundance : SLC29A1 (ENT1) PT Freq	0	Abundance : UGT1A7 UM Mean	0	User Cyt4 EM Mean CV (%)	30	Hydration level (% water volume) [bottom] : Male	66.4	UGT2B11 UM Mean CV (%)	0			Liver : 6 KpLPP	0.161
Abundance : SLC29A1 (ENT1) IT Freq	0	Abundance : UGT1A7 UM CV (%)	0	User Cyt4 PM Mean	0	Hydration level (% water volume) [bottom] CV (%) : Male	4	UGT2B11 IM Mean	0			Liver : 6 Local pH (IW)	7
Abundance : SLC29A1 (ENT1) UT Freq	0	Abundance : UGT1A7 IM Mean	0	User Cyt4 PM Mean CV (%)	0	SC lipid viscosity [bottom] centipose : Male	75	UGT2B11 IM Mean CV (%)	0			Liver : 6 Local pH (EW)	7.4
Abundance : SLC29A2 (ENT2) PT Freq	0	Abundance : UGT1A7 IM CV (%)	0	User Cyt4 UM Mean	0	SC lipid viscosity [bottom] CV (%) : Male	0	UGT2B11 Absolute Abundance	0
Abundance : SLC29A2 (ENT2) IT Freq	0	Absolute Abundance : UGT1A7	0	User Cyt4 UM Mean CV (%)	0	Viable Epidermis thickness µm : Male	41.9655	UGT2B15 EM Mean	1
Abundance : SLC29A2 (ENT2) UT Freq	0	Turnover rate : UGT1A7 Mean	1e-06	User Cyt4 IM Mean	0	Viable Epidermis thickness CV (%) : Male	19	UGT2B15 EM Mean CV (%)	60
Abundance : SLC47A1 (MATE1) PT Freq	0	Turnover rate : UGT1A7 CV (%)	30	User Cyt4 IM Mean CV (%)	0	Dermis thickness µm : Male	1240	UGT2B15 PM Mean	0.07
Abundance : SLC47A1 (MATE1) IT Freq	0	Abundance : UGT1A8 EM Mean	1	CES1 EM Mean	1	Dermis thickness CV (%) : Male	20	UGT2B15 PM Mean CV (%)	60
Abundance : SLC47A1 (MATE1) UT Freq	0	Abundance : UGT1A8 EM CV (%)	30	CES1 EM CV (%)	30	Subcutis thickness mm : Male	1.91	UGT2B15 UM Mean	0
Abundance : SLC47As (MATEs) PT Freq	0	Abundance : UGT1A8 PM Mean	0	CES1 PM Mean	0.11	Subcutis thickness CV (%) : Male	55.7	UGT2B15 UM Mean CV (%)	0
Abundance : SLC47As (MATEs) IT Freq	0	Abundance : UGT1A8 PM CV (%)	0	CES1 PM CV (%)	30	Muscle thickness mm : Male	29.88	UGT2B15 IM Mean	0.47
Abundance : SLC47As (MATEs) UT Freq	0	Abundance : UGT1A8 UM Mean	0	CES1 UM Mean	0	Muscle thickness CV (%) : Male	61.44	UGT2B15 IM Mean CV (%)	60
Abundance : SLC51A/B (OST-α/β) PT Freq	0	Abundance : UGT1A8 UM CV (%)	0	CES1 UM CV (%)	0	Dermis regional blood flow scalar : Male	0.909226	UGT2B15 Absolute Abundance	0.1
Abundance : SLC51A/B (OST-α/β) IT Freq	0	Abundance : UGT1A8 IM Mean	0	CES1 IM Mean	0	Dermis regional blood flow scalar CV (%) : Male	0	UGT2B17 EM Mean	1
Abundance : SLC51A/B (OST-α/β) UT Freq	0	Abundance : UGT1A8 IM CV (%)	0	CES1 IM CV (%)	0	Subcutis regional blood flow scalar : Male	1	UGT2B17 EM Mean CV (%)	60
Abundance : Apical Influx (Intestine) PT Freq	0	Absolute Abundance : UGT1A8	0	CES2 EM Mean	1	Subcutis regional blood flow scalar CV (%) : Male	0	UGT2B17 PM Mean	0.08
Abundance : Apical Influx (Intestine) IT Freq	0	Turnover rate : UGT1A8 Mean	1e-06	CES2 EM CV (%)	30	Muscle regional blood flow scalar : Male	1	UGT2B17 PM Mean CV (%)	60
Abundance : Apical Influx (Intestine) UT Freq	0	Turnover rate : UGT1A8 CV (%)	30	CES2 PM Mean	0	Muscle regional blood flow scalar CV (%) : Male	0	UGT2B17 UM Mean	0
Abundance : Apical Efflux (Intestine) PT Freq	0	Abundance : UGT1A9 EM Mean	1	CES2 PM CV (%)	0			UGT2B17 UM Mean CV (%)	0
Abundance : Apical Efflux (Intestine) IT Freq	0	Abundance : UGT1A9 EM CV (%)	30	CES2 UM Mean	0	MPMLA - Forearm Outer (dorsal)		UGT2B17 IM Mean	0.16
Abundance : Apical Efflux (Intestine) UT Freq	0	Abundance : UGT1A9 PM Mean	0.07	CES2 UM CV (%)	0	Skin surface pH : Male	4.5	UGT2B17 IM Mean CV (%)	60
Abundance : Sinusoidal Uptake (Liver) PT Freq	0	Abundance : UGT1A9 PM CV (%)	30	CES2 IM Mean	0	Skin surface pH CV (%) : Male	8.2	UGT2B17 Absolute Abundance	11
Abundance : Sinusoidal Uptake (Liver) IT Freq	0	Abundance : UGT1A9 UM Mean	0	CES2 IM CV (%)	0	Skin temperature °C : Male	32	UGT2B28 EM Mean	1
Abundance : Sinusoidal Uptake (Liver) UT Freq	0	Abundance : UGT1A9 UM CV (%)	0	Use User ES Option	Yes	Skin temperature CV (%) : Male	0	UGT2B28 EM Mean CV (%)	60
Abundance : Sinusoidal Efflux (Liver) PT Freq	0	Abundance : UGT1A9 IM Mean	0.19	User ES EM Mean	1	Shape of corneocyte : Male	Cuboid (brick)	UGT2B28 PM Mean	0
Abundance : Sinusoidal Efflux (Liver) IT Freq	0	Abundance : UGT1A9 IM CV (%)	30	User ES EM CV (%)	30	Shape of corneocyte : Female	Cuboid (brick)	UGT2B28 PM Mean CV (%)	0
Abundance : Sinusoidal Efflux (Liver) UT Freq	0	Absolute Abundance : UGT1A9	31	User ES PM Mean	0	Number of SC layers : Male	22	UGT2B28 UM Mean	0
Abundance : Canalicular Efflux (Liver) PT Freq	0	Turnover rate : UGT1A9 Mean	1e-06	User ES PM CV (%)	0	Number of SC layers CV (%) : Male	14	UGT2B28 UM Mean CV (%)	0
Abundance : Canalicular Efflux (Liver) IT Freq	0	Turnover rate : UGT1A9 CV (%)	30	User ES UM Mean	0	Water density gm/cm3 : Male	1	UGT2B28 IM Mean	0
Abundance : Canalicular Efflux (Liver) UT Freq	0	Abundance : UGT1A10 EM Mean	1	User ES UM CV (%)	0	Water density CV (%) : Male	0	UGT2B28 IM Mean CV (%)	0
Abundance : Apical Influx (Kidney) PT Freq	0	Abundance : UGT1A10 EM CV (%)	30	User ES IM Mean	0	SC lipids density gm/cm3 : Male	0.9	UGT2B28 Absolute Abundance	0
Abundance : Apical Influx (Kidney) IT Freq	0	Abundance : UGT1A10 PM Mean	0	User ES IM CV (%)	0	SC lipids density CV (%) : Male	0	Use User UGT Option	Yes
Abundance : Apical Influx (Kidney) UT Freq	0	Abundance : UGT1A10 PM CV (%)	0	EM Mean	0	SC proteins density gm/cm3 : Male	1.37	UGT User	1
Abundance : Basolateral Efflux (Kidney) PT Freq	0	Abundance : UGT1A10 UM Mean	0	EM CV (%)	0	SC proteins density CV (%) : Male	0	User UGT1 EM Mean	1
Abundance : Basolateral Efflux (Kidney) IT Freq	0	Abundance : UGT1A10 UM CV (%)	0	PM Mean	0	Intercellular lipid thickness of SC µm : Male	0.091	User UGT1 EM Mean CV (%)	60
Abundance : Basolateral Efflux (Kidney) UT Freq	0	Abundance : UGT1A10 IM Mean	0	PM CV (%)	0	Intercellular lipid thickness of SC CV (%) : Male	0	User UGT1 PM Mean	0
Abundance : Basolateral Influx (Intestine) PT Freq	0	Abundance : UGT1A10 IM CV (%)	0	UM Mean	0	Tortuosity : Male	User Defined	User UGT1 PM Mean CV (%)	0
Abundance : Basolateral Influx (Intestine) IT Freq	0	Absolute Abundance : UGT1A10	0.02	UM CV (%)	0	Tortuosity of lipid diffusion pathway of SC : Male	12.7	User UGT1 UM Mean	0
Abundance : Basolateral Influx (Intestine) UT Freq	0	Turnover rate : UGT1A10 Mean	1e-06	IM Mean	0	Tortuosity of lipid diffusion pathway of SC CV (%) : Male	18	User UGT1 UM Mean CV (%)	0
Abundance : Basolateral Efflux (Intestine) PT Freq	0	Turnover rate : UGT1A10 CV (%)	30	IM CV (%)	0	Hair follicle diameter µm : Male	77.7	User UGT1 IM Mean	0
Abundance : Basolateral Efflux (Intestine) IT Freq	0	Abundance : UGT2B4 EM Mean	1	EM Mean	0	Hair follicle diameter CV (%) : Male	32	User UGT1 IM Mean CV (%)	0
Abundance : Basolateral Efflux (Intestine) UT Freq	0	Abundance : UGT2B4 EM CV (%)	28	EM CV (%)	0	Hair follicle density N/cm2 : Male	18	User UGT1 Absolute Abundance	0
		Abundance : UGT2B4 PM Mean	0	PM Mean	0	Hair follicle density CV (%) : Male	39	Use User Cytosolic Enzyme Option	Yes
		Abundance : UGT2B4 PM CV (%)	0	PM CV (%)	0	Hair follicle depth µm : Male	109.5	User Cyt	1
		Abundance : UGT2B4 UM Mean	0	UM Mean	0	Hair follicle depth CV (%) : Male	0	User Cyt1 EM Mean	1
		Abundance : UGT2B4 UM CV (%)	0	UM CV (%)	0	Hair shaft diameter µm : Male	18	User Cyt1 EM Mean CV (%)	60
		Abundance : UGT2B4 IM Mean	0	IM Mean	0	Hair shaft diameter CV (%) : Male	34	User Cyt1 PM Mean	0
		Abundance : UGT2B4 IM CV (%)	0	IM CV (%)	0	Sebum viscosity centipose : Male	40	User Cyt1 PM Mean CV (%)	0
		Absolute Abundance : UGT2B4	54	FMO1 Absolute Abundance	5	Sebum viscosity CV (%) : Male	0	User Cyt1 UM Mean	0
		Turnover rate : UGT2B4 Mean	1e-06	FMO1 EM Mean	1	Corneocyte pH [top] : Male	6.8	User Cyt1 UM Mean CV (%)	0
		Turnover rate : UGT2B4 CV (%)	30	FMO1 EM CV (%)	35	Corneocyte pH [top] CV (%) : Male	6.8	User Cyt1 IM Mean	0
		Abundance : UGT2B7 EM Mean	1	FMO1 PM Mean	0	Corneocyte thickness [top] µm : Male	0.69	User Cyt1 IM Mean CV (%)	0
		Abundance : UGT2B7 EM CV (%)	30.4	FMO1 PM CV (%)	0	Corneocyte thickness [top] CV (%) : Male	22	Use User Cytosolic Enzyme Option	Yes
		Abundance : UGT2B7 PM Mean	0	FMO1 UM Mean	0	Corneocyte width [top] µm : Male	29.6	User Cyt	2
		Abundance : UGT2B7 PM CV (%)	0	FMO1 UM CV (%)	0	Corneocyte width [top] CV (%) : Male	5.9	User Cyt2 EM Mean	1
		Abundance : UGT2B7 UM Mean	0	FMO1 IM Mean	0	Corneocyte length [top] µm : Male	36.4	User Cyt2 EM Mean CV (%)	60
		Abundance : UGT2B7 UM CV (%)	0	FMO1 IM CV (%)	0	Corneocyte length [top] CV (%) : Male	5.7	User Cyt2 PM Mean	0
		Abundance : UGT2B7 IM Mean	0	FMO3 Absolute Abundance	0.47	Hydration level (% water volume) [top] : Male	33.9	User Cyt2 PM Mean CV (%)	0
		Abundance : UGT2B7 IM CV (%)	0	FMO3 EM Mean	1	Hydration level (% water volume) [top] CV (%) : Male	9	User Cyt2 UM Mean	0
		Absolute Abundance : UGT2B7	71	FMO3 EM CV (%)	79	SC lipid viscosity [top] centipose : Male	75	User Cyt2 UM Mean CV (%)	0
		Turnover rate : UGT2B7 Mean	1e-06	FMO3 PM Mean	0	SC lipid viscosity [top] CV (%) : Male	0	User Cyt2 IM Mean	0
		Turnover rate : UGT2B7 CV (%)	30	FMO3 PM CV (%)	0	Corneocyte pH [upper mid] : Male	6.8	User Cyt2 IM Mean CV (%)	0
		Abundance : UGT2B10 EM Mean	1	FMO3 UM Mean	0	Corneocyte pH [upper mid] CV (%) : Male	6.8	Use User Cytosolic Enzyme Option	Yes
		Abundance : UGT2B10 EM CV (%)	30	FMO3 UM CV (%)	0	Corneocyte thickness [upper mid] µm : Male	0.79	User Cyt	3
		Abundance : UGT2B10 PM Mean	0	FMO3 IM Mean	0	Corneocyte thickness [upper mid] CV (%) : Male	22	User Cyt3 EM Mean	1
		Abundance : UGT2B10 PM CV (%)	0	FMO3 IM CV (%)	0	Corneocyte width [upper mid] µm : Male	29.6	User Cyt3 EM Mean CV (%)	60
		Abundance : UGT2B10 UM Mean	0	FMO5 Absolute Abundance	2.6	Corneocyte width [upper mid] CV (%) : Male	5.9	User Cyt3 PM Mean	0
		Abundance : UGT2B10 UM CV (%)	0	FMO5 EM Mean	1	Corneocyte length [upper mid] µm : Male	36.4	User Cyt3 PM Mean CV (%)	0
		Abundance : UGT2B10 IM Mean	0	FMO5 EM CV (%)	57	Corneocyte length [upper mid] CV (%) : Male	5.7	User Cyt3 UM Mean	0
		Abundance : UGT2B10 IM CV (%)	0	FMO5 PM Mean	0	Hydration level (% water volume) [upper mid] : Male	44.6987	User Cyt3 UM Mean CV (%)	0
		Absolute Abundance : UGT2B10	6.5	FMO5 PM CV (%)	0	Hydration level (% water volume) [upper mid] CV (%) : Male	6	User Cyt3 IM Mean	0
		Turnover rate : UGT2B10 Mean	1e-06	FMO5 UM Mean	0	SC lipid viscosity [upper mid] centipose : Male	75	User Cyt3 IM Mean CV (%)	0
		Turnover rate : UGT2B10 CV (%)	30	FMO5 UM CV (%)	0	SC lipid viscosity [upper mid] CV (%) : Male	0	Use User Cytosolic Enzyme Option	Yes
		Abundance : UGT2B11 EM Mean	1	FMO5 IM Mean	0	Corneocyte pH [lower mid] : Male	6.8	User Cyt	4
		Abundance : UGT2B11 EM CV (%)	30	FMO5 IM CV (%)	0	Corneocyte pH [lower mid] CV (%) : Male	6.8	User Cyt4 EM Mean	1
		Abundance : UGT2B11 PM Mean	0	FMOUser Absolute Abundance	0	Corneocyte thickness [lower mid] µm : Male	0.89	User Cyt4 EM Mean CV (%)	60
		Abundance : UGT2B11 PM CV (%)	0	FMOUser EM Mean	1	Corneocyte thickness [lower mid] CV (%) : Male	22	User Cyt4 PM Mean	0
		Abundance : UGT2B11 UM Mean	0	FMOUser EM CV (%)	30	Corneocyte width [lower mid] µm : Male	29.6	User Cyt4 PM Mean CV (%)	0
		Abundance : UGT2B11 UM CV (%)	0	FMOUser PM Mean	0	Corneocyte width [lower mid] CV (%) : Male	5.9	User Cyt4 UM Mean	0
		Abundance : UGT2B11 IM Mean	0	FMOUser PM CV (%)	0	Corneocyte length [lower mid] µm : Male	36.4	User Cyt4 UM Mean CV (%)	0
		Abundance : UGT2B11 IM CV (%)	0	FMOUser UM Mean	0	Corneocyte length [lower mid] CV (%) : Male	5.7	User Cyt4 IM Mean	0
		Absolute Abundance : UGT2B11	0	FMOUser UM CV (%)	0	Hydration level (% water volume) [lower mid] : Male	55.5388	User Cyt4 IM Mean CV (%)	0
		Turnover rate : UGT2B11 Mean	1e-06	FMOUser IM Mean	0	Hydration level (% water volume) [lower mid] CV (%) : Male	5	CES1 EM Mean	1
		Turnover rate : UGT2B11 CV (%)	30	FMOUser IM CV (%)	0	SC lipid viscosity [lower mid] centipose : Male	75	CES1 EM CV (%)	30
		Abundance : UGT2B15 EM Mean	1	Cortex/Medulla Ratio	0.92	SC lipid viscosity [lower mid] CV (%) : Male	0	CES1 PM Mean	0.11
		Abundance : UGT2B15 EM CV (%)	34	Peritubular Capillary (% Kidney volume)	7	Corneocyte pH [bottom] : Male	6.8	CES1 PM CV (%)	30
		Abundance : UGT2B15 PM Mean	0.07	Million Nephrons per Subject Baseline	0.22693	Corneocyte pH [bottom] CV (%) : Male	6.8	CES1 UM Mean	0
		Abundance : UGT2B15 PM CV (%)	33	Kidney Weight Coefficient	0.003948	Corneocyte thickness [bottom] µm : Male	1	CES1 UM CV (%)	0
		Abundance : UGT2B15 UM Mean	0	Proximal Tubule Length (mm)	18	Corneocyte thickness [bottom] CV (%) : Male	22	CES1 IM Mean	0
		Abundance : UGT2B15 UM CV (%)	0	Henle's Loop Length (mm)	7	Corneocyte width [bottom] µm : Male	29.6	CES1 IM CV (%)	0
		Abundance : UGT2B15 IM Mean	0.47	Distal Tubule Length (mm)	5.5	Corneocyte width [bottom] CV (%) : Male	5.9	CES2 EM Mean	1
		Abundance : UGT2B15 IM CV (%)	37	Collecting Duct Length (mm)	22	Corneocyte length [bottom] µm : Male	36.4	CES2 EM CV (%)	30
		Absolute Abundance : UGT2B15	39	Proximal Tubule Diameter (mm)	0.06	Corneocyte length [bottom] CV (%) : Male	5.7	CES2 PM Mean	0
		Turnover rate : UGT2B15 Mean	1e-06	Henle's Loop Diameter (mm)	0.018	Hydration level (% water volume) [bottom] : Male	66.4	CES2 PM CV (%)	0
		Turnover rate : UGT2B15 CV (%)	30	Distal Tubule Diameter (mm)	0.05	Hydration level (% water volume) [bottom] CV (%) : Male	4	CES2 UM Mean	0
		Abundance : UGT2B17 EM Mean	1	Collecting Duct Diameter (mm)	0.2	SC lipid viscosity [bottom] centipose : Male	75	CES2 UM CV (%)	0
		Abundance : UGT2B17 EM CV (%)	28	Proximal Tubule pH	7.4	SC lipid viscosity [bottom] CV (%) : Male	0	CES2 IM Mean	0
		Abundance : UGT2B17 PM Mean	0.08	Henle's Loop pH	7.4	Viable Epidermis thickness µm : Male	53.5684	CES2 IM CV (%)	0
		Abundance : UGT2B17 PM CV (%)	40	Distal Tubule pH	7.4	Viable Epidermis thickness CV (%) : Male	21	Use User ES Option	Yes
		Abundance : UGT2B17 UM Mean	0	Collecting Duct pH	7.4	Dermis thickness µm : Male	1240	User ES EM Mean	1
		Abundance : UGT2B17 UM CV (%)	0	GFR Male Input Type	Predicted	Dermis thickness CV (%) : Male	20	User ES EM CV (%)	30
		Abundance : UGT2B17 IM Mean	0.16	Male - Proximal Tubule Urine Flow Rate - GFR (mL/min)	130	Subcutis thickness mm : Male	1.91	User ES PM Mean	0
		Abundance : UGT2B17 IM CV (%)	30	Male - Henle's Loop Urine Flow Rate (mL/min)	46.77	Subcutis thickness CV (%) : Male	55.7	User ES PM CV (%)	0
		Absolute Abundance : UGT2B17	5.9	Male - Distal Tubule Urine Flow Rate (mL/min)	25.97	Muscle thickness mm : Male	29.88	User ES UM Mean	0
		Turnover rate : UGT2B17 Mean	1e-06	Male - Collecting Duct Urine Flow Rate (mL/min)	12.44	Muscle thickness CV (%) : Male	61.44	User ES UM CV (%)	0
		Turnover rate : UGT2B17 CV (%)	30	Male - Urine Flow Rate into Bladder (mL/min)	1	Dermis regional blood flow scalar : Male	0.5875	User ES IM Mean	0
		Abundance : UGT2B28 EM Mean	1	GFR Female Input Type	Predicted	Dermis regional blood flow scalar CV (%) : Male	0	User ES IM CV (%)	0
		Abundance : UGT2B28 EM CV (%)	30	Female - Proximal Tubule Urine Flow Rate - GFR (mL/min)	120	Subcutis regional blood flow scalar : Male	1	EM Mean	0
		Abundance : UGT2B28 PM Mean	0	Female - Henle's Loop Urine Flow Rate (mL/min)	43.23	Subcutis regional blood flow scalar CV (%) : Male	0	EM CV (%)	0
		Abundance : UGT2B28 PM CV (%)	0	Female - Distal Tubule Urine Flow Rate (mL/min)	24.03	Muscle regional blood flow scalar : Male	1	PM Mean	0
		Abundance : UGT2B28 UM Mean	0	Female - Collecting Duct Urine Flow Rate (mL/min)	11.56	Muscle regional blood flow scalar CV (%) : Male	0	PM CV (%)	0
		Abundance : UGT2B28 UM CV (%)	0	Female - Urine Flow Rate into Bladder (mL/min)	1			UM Mean	0
		Abundance : UGT2B28 IM Mean	0	Bypass 1 before Glomerulus (%)	10	MPMLA - Upper Arm		UM CV (%)	0
		Abundance : UGT2B28 IM CV (%)	0	Bypass 1 before Glomerulus CV (%)	30	Skin surface pH : Male	5.5	IM Mean	0
		Absolute Abundance : UGT2B28	0	Bypass 2 to Henle's Loop & Medu-CD (%)	20	Skin surface pH CV (%) : Male	11.1	IM CV (%)	0
		Turnover rate : UGT2B28 Mean	1e-06	Bypass 2 to Henle's Loop & Medu-CD CV (%)	30	Skin temperature °C : Male	32	EM Mean	0
		Turnover rate : UGT2B28 CV (%)	30	PT-S1 ABCB1 (MDR1/P-gp) / 106 PTC (Relative Values)	1	Skin temperature CV (%) : Male	0	EM CV (%)	0
		Use User UGT Option	Yes	PT-S1 ABCC4 (MRP4) / 106 PTC (Relative Values)	1	Shape of corneocyte : Male	Cuboid (brick)	PM Mean	0
		UGT User	1	PT-S1 SLC22A2 (OCT2) / 106 PTC (Relative Values)	1	Shape of corneocyte : Female	Cuboid (brick)	PM CV (%)	0
		Abundance : User UGT1 EM Mean	1	PT-S1 SLC22A6 (OAT1) / 106 PTC (Relative Values)	1	Number of SC layers : Male	18	UM Mean	0
		Abundance : User UGT1 EM CV (%)	30	PT-S1 SLC22A8 (OAT3) / 106 PTC (Relative Values)	1	Number of SC layers CV (%) : Male	21.6	UM CV (%)	0
		Abundance : User UGT1 PM Mean	0	PT-S1 SLC47As (MATEs) / 106 PTC (Relative Values)	1	Water density gm/cm3 : Male	1	IM Mean	0
		Abundance : User UGT1 PM CV (%)	0	PT-S1 Apical Influx (Kidney) / 106 PTC (Relative Values)	1	Water density CV (%) : Male	0	IM CV (%)	0
		Abundance : User UGT1 UM Mean	0	PT-S1 Basolateral Efflux (Kidney) / 106 PTC (Relative Values)	1	SC lipids density gm/cm3 : Male	0.9	FMO1 Absolute Abundance	0
		Abundance : User UGT1 UM CV (%)	0	PT-S2 ABCB1 (MDR1/P-gp) / 106 PTC (Relative Values)	1	SC lipids density CV (%) : Male	0	FMO1 EM Mean	1
		Abundance : User UGT1 IM Mean	0	PT-S2 ABCC4 (MRP4) / 106 PTC (Relative Values)	1	SC proteins density gm/cm3 : Male	1.37	FMO1 EM CV (%)	30
		Abundance : User UGT1 IM CV (%)	0	PT-S2 SLC22A2 (OCT2) / 106 PTC (Relative Values)	1	SC proteins density CV (%) : Male	0	FMO1 PM Mean	0
		Absolute Abundance : User UGT1	0	PT-S2 SLC22A6 (OAT1) / 106 PTC (Relative Values)	1	Intercellular lipid thickness of SC µm : Male	0.091	FMO1 PM CV (%)	0
		Turnover rate : User UGT1 Mean	1e-06	PT-S2 SLC22A8 (OAT3) / 106 PTC (Relative Values)	1	Intercellular lipid thickness of SC CV (%) : Male	0	FMO1 UM Mean	0
		Turnover rate : User UGT1 CV (%)	30	PT-S2 SLC47As (MATEs) / 106 PTC (Relative Values)	1	Tortuosity : Male	User Defined	FMO1 UM CV (%)	0
		Use User Cytosolic Enzyme Option	Yes	PT-S2 Apical Influx (Kidney) / 106 PTC (Relative Values)	1	Tortuosity of lipid diffusion pathway of SC : Male	12.7	FMO1 IM Mean	0
		User Cyt	1	PT-S2 Basolateral Efflux (Kidney) / 106 PTC (Relative Values)	1	Tortuosity of lipid diffusion pathway of SC CV (%) : Male	18	FMO1 IM CV (%)	0
		Abundance : User Cyt1 EM Mean	1	PT-S3 ABCB1 (MDR1/P-gp) / 106 PTC (Relative Values)	1	Hair follicle diameter µm : Male	88.8	FMO3 Absolute Abundance	0
		Abundance : User Cyt1 EM CV (%)	30	PT-S3 ABCC4 (MRP4) / 106 PTC (Relative Values)	1	Hair follicle diameter CV (%) : Male	33	FMO3 EM Mean	1
		Abundance : User Cyt1 PM Mean	0	PT-S3 SLC22A2 (OCT2) / 106 PTC (Relative Values)	1	Hair follicle density N/cm2 : Male	32	FMO3 EM CV (%)	30
		Abundance : User Cyt1 PM CV (%)	0	PT-S3 SLC22A6 (OAT1) / 106 PTC (Relative Values)	1	Hair follicle density CV (%) : Male	28	FMO3 PM Mean	0
		Abundance : User Cyt1 UM Mean	0	PT-S3 SLC22A8 (OAT3) / 106 PTC (Relative Values)	1	Hair follicle depth µm : Male	256.7	FMO3 PM CV (%)	0
		Abundance : User Cyt1 UM CV (%)	0	PT-S3 SLC47As (MATEs) / 106 PTC (Relative Values)	1	Hair follicle depth CV (%) : Male	0	FMO3 UM Mean	0
		Abundance : User Cyt1 IM Mean	0	PT-S3 Apical Influx (Kidney) / 106 PTC (Relative Values)	1	Hair shaft diameter µm : Male	16.8	FMO3 UM CV (%)	0
		Abundance : User Cyt1 IM CV (%)	0	PT-S3 Basolateral Efflux (Kidney) / 106 PTC (Relative Values)	1	Hair shaft diameter CV (%) : Male	37	FMO3 IM Mean	0
		Use User Cytosolic Enzyme Option	Yes	ABCB1 (P-gp/MDR1) ET Mean	1	Sebum viscosity centipose : Male	40	FMO3 IM CV (%)	0
		User Cyt	2	ABCB1 (P-gp/MDR1) ET CV (%)	60	Sebum viscosity CV (%) : Male	0	FMO5 Absolute Abundance	0
		Abundance : User Cyt2 EM Mean	1	ABCB1 (P-gp/MDR1) PT Mean	0	Corneocyte pH [top] : Male	6.8	FMO5 EM Mean	1
		Abundance : User Cyt2 EM CV (%)	30	ABCB1 (P-gp/MDR1) PT CV (%)	0	Corneocyte pH [top] CV (%) : Male	6.8	FMO5 EM CV (%)	30
		Abundance : User Cyt2 PM Mean	0	ABCB1 (P-gp/MDR1) IT Mean	0	Corneocyte thickness [top] µm : Male	0.71	FMO5 PM Mean	0
		Abundance : User Cyt2 PM CV (%)	0	ABCB1 (P-gp/MDR1) IT CV (%)	0	Corneocyte thickness [top] CV (%) : Male	11	FMO5 PM CV (%)	0
		Abundance : User Cyt2 UM Mean	0	ABCB1 (P-gp/MDR1) UT Mean	0	Corneocyte width [top] µm : Male	33.2	FMO5 UM Mean	0
		Abundance : User Cyt2 UM CV (%)	0	ABCB1 (P-gp/MDR1) UT CV (%)	0	Corneocyte width [top] CV (%) : Male	10.4	FMO5 UM CV (%)	0
		Abundance : User Cyt2 IM Mean	0	ABCC4 (MRP4) ET Mean	1	Corneocyte length [top] µm : Male	40.4	FMO5 IM Mean	0
		Abundance : User Cyt2 IM CV (%)	0	ABCC4 (MRP4) ET CV (%)	60	Corneocyte length [top] CV (%) : Male	6.8	FMO5 IM CV (%)	0
		Use User Cytosolic Enzyme Option	Yes	ABCC4 (MRP4) PT Mean	0	Hydration level (% water volume) [top] : Male	33.6	FMOUser Absolute Abundance	0
		User Cyt	3	ABCC4 (MRP4) PT CV (%)	0	Hydration level (% water volume) [top] CV (%) : Male	11	FMOUser EM Mean	1
		Abundance : User Cyt3 EM Mean	1	ABCC4 (MRP4) IT Mean	0	SC lipid viscosity [top] centipose : Male	75	FMOUser EM CV (%)	30
		Abundance : User Cyt3 EM CV (%)	30	ABCC4 (MRP4) IT CV (%)	0	SC lipid viscosity [top] CV (%) : Male	0	FMOUser PM Mean	0
		Abundance : User Cyt3 PM Mean	0	ABCC4 (MRP4) UT Mean	0	Corneocyte pH [upper mid] : Male	6.8	FMOUser PM CV (%)	0
		Abundance : User Cyt3 PM CV (%)	0	ABCC4 (MRP4) UT CV (%)	0	Corneocyte pH [upper mid] CV (%) : Male	6.8	FMOUser UM Mean	0
		Abundance : User Cyt3 UM Mean	0	SLC22A2 (OCT2) ET Mean	1	Corneocyte thickness [upper mid] µm : Male	0.81	FMOUser UM CV (%)	0
		Abundance : User Cyt3 UM CV (%)	0	SLC22A2 (OCT2) ET CV (%)	60	Corneocyte thickness [upper mid] CV (%) : Male	11	FMOUser IM Mean	0
		Abundance : User Cyt3 IM Mean	0	SLC22A2 (OCT2) PT Mean	0	Corneocyte width [upper mid] µm : Male	33.2	FMOUser IM CV (%)	0
		Abundance : User Cyt3 IM CV (%)	0	SLC22A2 (OCT2) PT CV (%)	0	Corneocyte width [upper mid] CV (%) : Male	10.4	Achlorhydric Coefficient	0
		Use User Cytosolic Enzyme Option	Yes	SLC22A2 (OCT2) IT Mean	0	Corneocyte length [upper mid] µm : Male	40.4	Achlorhydric Age Power	0
		User Cyt	4	SLC22A2 (OCT2) IT CV (%)	0	Corneocyte length [upper mid] CV (%) : Male	6.8	Achlorhydric Maximum (%)	0
		Abundance : User Cyt4 EM Mean	1	SLC22A2 (OCT2) UT Mean	0	Hydration level (% water volume) [upper mid] : Male	44.858	Intestine pH Model	Static
		Abundance : User Cyt4 EM CV (%)	30	SLC22A2 (OCT2) UT CV (%)	0	Hydration level (% water volume) [upper mid] CV (%) : Male	7	Stomach pH Fasted	1.5
		Abundance : User Cyt4 PM Mean	0	SLC22A6 (OAT1) ET Mean	1	SC lipid viscosity [upper mid] centipose : Male	75	Stomach CV pH Fasted (%)	38
		Abundance : User Cyt4 PM CV (%)	0	SLC22A6 (OAT1) ET CV (%)	60	SC lipid viscosity [upper mid] CV (%) : Male	0	Stomach pH High Fat Fed initial	4.39
		Abundance : User Cyt4 UM Mean	0	SLC22A6 (OAT1) PT Mean	0	Corneocyte pH [lower mid] : Male	6.8	Stomach CV pH High Fat Fed initial (%)	24
		Abundance : User Cyt4 UM CV (%)	0	SLC22A6 (OAT1) PT CV (%)	0	Corneocyte pH [lower mid] CV (%) : Male	6.8	k	0.467
		Abundance : User Cyt4 IM Mean	0	SLC22A6 (OAT1) IT Mean	0	Corneocyte thickness [lower mid] µm : Male	0.93	k CV (%)	97.8
		Abundance : User Cyt4 IM CV (%)	0	SLC22A6 (OAT1) IT CV (%)	0	Corneocyte thickness [lower mid] CV (%) : Male	11	Stomach pH Fed initial	5
		Abundance : CES1 EM Mean	1	SLC22A6 (OAT1) UT Mean	0	Corneocyte width [lower mid] µm : Male	33.2	Stomach CV pH Fed initial (%)	25
		Abundance : CES1 EM CV (%)	46	SLC22A6 (OAT1) UT CV (%)	0	Corneocyte width [lower mid] CV (%) : Male	10.4	Age < 65 Fed Tff (h)	1.8
		Abundance : CES1 PM Mean	0.11	SLC22A8 (OAT3) ET Mean	1	Corneocyte length [lower mid] µm : Male	40.4	Age < 65 Fed Tff CV (%)	65
		Abundance : CES1 PM CV (%)	30	SLC22A8 (OAT3) ET CV (%)	60	Corneocyte length [lower mid] CV (%) : Male	6.8	Age ≥ 65 Fed Tff (h)	3
		Abundance : CES1 UM Mean	0	SLC22A8 (OAT3) PT Mean	0	Hydration level (% water volume) [lower mid] : Male	56.0703	Age ≥ 65 Fed Tff CV (%)	80
		Abundance : CES1 UM CV (%)	0	SLC22A8 (OAT3) PT CV (%)	0	Hydration level (% water volume) [lower mid] CV (%) : Male	5	Stomach pH Low Fat Fed initial	5
		Abundance : CES1 IM Mean	0	SLC22A8 (OAT3) IT Mean	0	SC lipid viscosity [lower mid] centipose : Male	75	Stomach CV pH Low Fat Fed initial (%)	25
		Abundance : CES1 IM CV (%)	0	SLC22A8 (OAT3) IT CV (%)	0	SC lipid viscosity [lower mid] CV (%) : Male	0	Age < 65 Low Fat Fed Tff (h)	1.8
		Abundance : CES2 EM Mean	1	SLC22A8 (OAT3) UT Mean	0	Corneocyte pH [bottom] : Male	6.8	Age < 65 Low Fat Fed Tff CV (%)	0
		Abundance : CES2 EM CV (%)	35	SLC22A8 (OAT3) UT CV (%)	0	Corneocyte pH [bottom] CV (%) : Male	6.8	Age ≥ 65 Low Fat Fed Tff (h)	3
		Abundance : CES2 PM Mean	0	SLC47As (MATEs) ET Mean	1	Corneocyte thickness [bottom] µm : Male	1.04	Age ≥ 65 Low Fat Fed Tff CV (%)	0
		Abundance : CES2 PM CV (%)	0	SLC47As (MATEs) ET CV (%)	60	Corneocyte thickness [bottom] CV (%) : Male	11	Stomach Bicarbonate Buffer Concentration Fasted (mM)	7.3
		Abundance : CES2 UM Mean	0	SLC47As (MATEs) PT Mean	0	Corneocyte width [bottom] µm : Male	33.2	Stomach Bicarbonate Buffer Concentration CV Fasted (%)	30
		Abundance : CES2 UM CV (%)	0	SLC47As (MATEs) PT CV (%)	0	Corneocyte width [bottom] CV (%) : Male	10.4	Stomach Bicarbonate Buffer Concentration Fed (mM)	42.46
		Abundance : CES2 IM Mean	0	SLC47As (MATEs) IT Mean	0	Corneocyte length [bottom] µm : Male	40.4	Stomach Bicarbonate Buffer Concentration CV Fed (%)	30
		Abundance : CES2 IM CV (%)	0	SLC47As (MATEs) IT CV (%)	0	Corneocyte length [bottom] CV (%) : Male	6.8	Stomach Luminal Fluid Velocity Fasted (m/s)	0.032
		Use User ES Option	Yes	SLC47As (MATEs) UT Mean	0	Hydration level (% water volume) [bottom] : Male	67.3	Stomach Luminal Fluid Velocity CV Fasted (%)	30
		Abundance : User ES EM Mean	1	SLC47As (MATEs) UT CV (%)	0	Hydration level (% water volume) [bottom] CV (%) : Male	4	Stomach Luminal Fluid Velocity Fed (m/s)	0.032
		Abundance : User ES EM CV (%)	30	Apical Influx (Kidney) ET Mean	1	SC lipid viscosity [bottom] centipose : Male	75	Stomach Luminal Fluid Velocity CV Fed (%)	30
		Abundance : User ES PM Mean	0	Apical Influx (Kidney) ET CV (%)	60	SC lipid viscosity [bottom] CV (%) : Male	0	Stomach Endogenous Ion Hydrochloric Mean (mM)	102
		Abundance : User ES PM CV (%)	0	Apical Influx (Kidney) PT Mean	0	Viable Epidermis thickness µm : Male	51.8	Stomach Endogenous Ion Hydrochloric CV (%)	27.5
		Abundance : User ES UM Mean	0	Apical Influx (Kidney) PT CV (%)	0	Viable Epidermis thickness CV (%) : Male	15	Stomach Endogenous Ion Hydrochloric Min (mM)	48
		Abundance : User ES UM CV (%)	0	Apical Influx (Kidney) IT Mean	0	Dermis thickness µm : Male	1540	Stomach Endogenous Ion Hydrochloric Max (mM)	173
		Abundance : User ES IM Mean	0	Apical Influx (Kidney) IT CV (%)	0	Dermis thickness CV (%) : Male	29	Stomach Endogenous Ion Sodium Mean (mM)	68
		Abundance : User ES IM CV (%)	0	Apical Influx (Kidney) UT Mean	0	Subcutis thickness mm : Male	8.41	Stomach Endogenous Ion Sodium CV (%)	42.6
		Abundance : EM Mean	0	Apical Influx (Kidney) UT CV (%)	0	Subcutis thickness CV (%) : Male	39.6	Stomach Endogenous Ion Sodium Min (mM)	19
		Abundance : EM CV (%)	0	Basolateral Efflux (Kidney) ET Mean	1	Muscle thickness mm : Male	28.92	Stomach Endogenous Ion Sodium Max (mM)	122
		Abundance : PM Mean	0	Basolateral Efflux (Kidney) ET CV (%)	60	Muscle thickness CV (%) : Male	15.09	Stomach Endogenous Ion Potassium Mean (mM)	13.4
		Abundance : PM CV (%)	0	Basolateral Efflux (Kidney) PT Mean	0	Dermis regional blood flow scalar : Male	1.2869	Stomach Endogenous Ion Potassium CV (%)	22.4
		Abundance : UM Mean	0	Basolateral Efflux (Kidney) PT CV (%)	0	Dermis regional blood flow scalar CV (%) : Male	0	Stomach Endogenous Ion Potassium Min (mM)	8.4
		Abundance : UM CV (%)	0	Basolateral Efflux (Kidney) IT Mean	0	Subcutis regional blood flow scalar : Male	1	Stomach Endogenous Ion Potassium Max (mM)	19.3
		Abundance : IM Mean	0	Basolateral Efflux (Kidney) IT CV (%)	0	Subcutis regional blood flow scalar CV (%) : Male	0	Stomach Endogenous Ion Calcium Mean (mM)	0.6
		Abundance : IM CV (%)	0	Basolateral Efflux (Kidney) UT Mean	0	Muscle regional blood flow scalar : Male	1	Stomach Endogenous Ion Calcium CV (%)	33.3
		Abundance : EM Mean	0	Basolateral Efflux (Kidney) UT CV (%)	0	Muscle regional blood flow scalar CV (%) : Male	0	Stomach Endogenous Ion Calcium Min (mM)	0.3
		Abundance : EM CV (%)	0					Stomach Endogenous Ion Calcium Max (mM)	1.2
		Abundance : PM Mean	0			MPMLA - Face (cheek)		Stomach Endogenous Ion Generic Cation Mean (mM)	1
		Abundance : PM CV (%)	0			Skin surface pH : Male	4.7	Stomach Endogenous Ion Generic Cation CV (%)	0
		Abundance : UM Mean	0			Skin surface pH CV (%) : Male	7.2	Stomach Endogenous Ion Generic Cation Min (mM)	0.01
		Abundance : UM CV (%)	0			Skin temperature °C : Male	32	Stomach Endogenous Ion Generic Cation Max (mM)	1000
		Abundance : IM Mean	0			Skin temperature CV (%) : Male	0	Stomach Endogenous Ion Generic Anion Mean (mM)	1
		Abundance : IM CV (%)	0			Shape of corneocyte : Male	Cuboid (brick)	Stomach Endogenous Ion Generic Anion CV (%)	0
		Absolute Abundance : FMO1	0			Shape of corneocyte : Female	Cuboid (brick)	Stomach Endogenous Ion Generic Anion Min (mM)	0.01
		Abundance : FMO1 EM Mean	1			Number of SC layers : Male	13	Stomach Endogenous Ion Generic Anion Max (mM)	1000
		Abundance : FMO1 EM CV (%)	30			Number of SC layers CV (%) : Male	22.6	Stomach Fluid Viscosity Fasted (cP)	3
		Abundance : FMO1 PM Mean	0			Water density gm/cm3 : Male	1	Stomach Fluid Viscosity CV Fasted (%)	71
		Abundance : FMO1 PM CV (%)	0			Water density CV (%) : Male	0	Stomach Fluid Viscosity Fed (cP)	232
		Abundance : FMO1 UM Mean	0			SC lipids density gm/cm3 : Male	0.9	Stomach Fluid Viscosity CV Fed (%)	32
		Abundance : FMO1 UM CV (%)	0			SC lipids density CV (%) : Male	0	Stomach CMC fasted (mM)	1
		Abundance : FMO1 IM Mean	0			SC proteins density gm/cm3 : Male	1.37	Stomach CMC fed (mM)	1
		Abundance : FMO1 IM CV (%)	0			SC proteins density CV (%) : Male	0	Stomach Bile fasted (mM)	0.34
		Absolute Abundance : FMO3	30			Intercellular lipid thickness of SC µm : Male	0.091	Stomach Bile fasted CV (%)	134
		Abundance : FMO3 EM Mean	1			Intercellular lipid thickness of SC CV (%) : Male	0	Stomach Bile fed (mM)	0.34
		Abundance : FMO3 EM CV (%)	50			Tortuosity : Male	User Defined	Stomach Bile fed CV (%)	216.7
		Abundance : FMO3 PM Mean	0			Tortuosity of lipid diffusion pathway of SC : Male	12.7	Duodenum Blood Flow (Qvilli %)	8.8
		Abundance : FMO3 PM CV (%)	0			Tortuosity of lipid diffusion pathway of SC CV (%) : Male	18	Duodenum Transit Time (% Total)	4.6
		Abundance : FMO3 UM Mean	0			Hair follicle diameter µm : Male	65.4	Duodenum CYP3A (% Total)	13.76
		Abundance : FMO3 UM CV (%)	0			Hair follicle diameter CV (%) : Male	83	Duodenum S9PPI (% Total)	14.88
		Abundance : FMO3 IM Mean	0			Hair follicle density N/cm2 : Male	292	Duodenum MPPI/CYP (% Total)	13.76
		Abundance : FMO3 IM CV (%)	0			Hair follicle density CV (%) : Male	16	Duodenum CPPI (% Total)	14.88
		Absolute Abundance : FMO5	25			Hair follicle depth µm : Male	204.8	Duodenum pH High Fat Fed	5.4
		Abundance : FMO5 EM Mean	1			Hair follicle depth CV (%) : Male	0	Duodenum CV pH High Fat Fed (%)	11
		Abundance : FMO5 EM CV (%)	55			Hair shaft diameter µm : Male	15.9	Duodenum pH Fed	5.4
		Abundance : FMO5 PM Mean	0			Hair shaft diameter CV (%) : Male	57	Duodenum CV pH Fed (%)	11
		Abundance : FMO5 PM CV (%)	0			Sebum viscosity centipose : Male	40	Duodenum pH Low Fat Fed	5.4
		Abundance : FMO5 UM Mean	0			Sebum viscosity CV (%) : Male	0	Duodenum CV pH Low Fat Fed (%)	11
		Abundance : FMO5 UM CV (%)	0			Corneocyte pH [top] : Male	6.8	Duodenum pH Fasted	6.4
		Abundance : FMO5 IM Mean	0			Corneocyte pH [top] CV (%) : Male	6.8	Duodenum CV pH Fasted (%)	16
		Abundance : FMO5 IM CV (%)	0			Corneocyte thickness [top] µm : Male	0.47	Duodenum Bicarbonate Buffer Concentration Fasted (mM)	6.53
		Absolute Abundance : FMOUser	0			Corneocyte thickness [top] CV (%) : Male	4	Duodenum Bicarbonate Buffer Concentration CV Fasted (%)	30
		Abundance : FMOUser EM Mean	1			Corneocyte width [top] µm : Male	27.7	Duodenum Bicarbonate Buffer Concentration Fed (mM)	34.19
		Abundance : FMOUser EM CV (%)	30			Corneocyte width [top] CV (%) : Male	9.2	Duodenum Bicarbonate Buffer Concentration CV Fed (%)	30
		Abundance : FMOUser PM Mean	0			Corneocyte length [top] µm : Male	34.2	Duodenum Luminal Fluid Velocity Fasted (m/s)	0.005
		Abundance : FMOUser PM CV (%)	0			Corneocyte length [top] CV (%) : Male	4.1	Duodenum Luminal Fluid Velocity CV Fasted (%)	30
		Abundance : FMOUser UM Mean	0			Hydration level (% water volume) [top] : Male	35.5	Duodenum Luminal Fluid Velocity Fed (m/s)	0.005
		Abundance : FMOUser UM CV (%)	0			Hydration level (% water volume) [top] CV (%) : Male	17	Duodenum Luminal Fluid Velocity CV Fed (%)	30
		Abundance : FMOUser IM Mean	0			SC lipid viscosity [top] centipose : Male	75	Duodenum Endogenous Ion Hydrochloric Mean (mM)	102.4
		Abundance : FMOUser IM CV (%)	0			SC lipid viscosity [top] CV (%) : Male	0	Duodenum Endogenous Ion Hydrochloric CV (%)	15.1
		CV for non P450 Clearance	30			Corneocyte pH [upper mid] : Male	6.8	Duodenum Endogenous Ion Hydrochloric Min (mM)	64.6
		Absolute Abundance : ABCB1 (P-gp/MDR1) (pmol/10^6 hepatocytes)	0.246			Corneocyte pH [upper mid] CV (%) : Male	6.8	Duodenum Endogenous Ion Hydrochloric Max (mM)	158.8
		Abundance : ABCB1 (P-gp/MDR1) ET Mean	1			Corneocyte thickness [upper mid] µm : Male	0.53	Duodenum Endogenous Ion Sodium Mean (mM)	118.4
		Abundance : ABCB1 (P-gp/MDR1) ET CV (%)	59			Corneocyte thickness [upper mid] CV (%) : Male	4	Duodenum Endogenous Ion Sodium CV (%)	9.2
		Abundance : ABCB1 (P-gp/MDR1) PT Mean	0			Corneocyte width [upper mid] µm : Male	27.7	Duodenum Endogenous Ion Sodium Min (mM)	89.6
		Abundance : ABCB1 (P-gp/MDR1) PT CV (%)	0			Corneocyte width [upper mid] CV (%) : Male	9.2	Duodenum Endogenous Ion Sodium Max (mM)	155.1
		Abundance : ABCB1 (P-gp/MDR1) IT Mean	0			Corneocyte length [upper mid] µm : Male	34.2	Duodenum Endogenous Ion Potassium Mean (mM)	11.2
		Abundance : ABCB1 (P-gp/MDR1) IT CV (%)	0			Corneocyte length [upper mid] CV (%) : Male	4.1	Duodenum Endogenous Ion Potassium CV (%)	38.9
		Abundance : ABCB1 (P-gp/MDR1) UT Mean	0			Hydration level (% water volume) [upper mid] : Male	46.1	Duodenum Endogenous Ion Potassium Min (mM)	3.4
		Abundance : ABCB1 (P-gp/MDR1) UT CV (%)	0			Hydration level (% water volume) [upper mid] CV (%) : Male	11	Duodenum Endogenous Ion Potassium Max (mM)	32.1
		Absolute Abundance : ABCB11 (BSEP) (pmol/10^6 hepatocytes)	1			SC lipid viscosity [upper mid] centipose : Male	75	Duodenum Endogenous Ion Calcium Mean (mM)	0.5
		Abundance : ABCB11 (BSEP) ET Mean	1			SC lipid viscosity [upper mid] CV (%) : Male	0	Duodenum Endogenous Ion Calcium CV (%)	60
		Abundance : ABCB11 (BSEP) ET CV (%)	131			Corneocyte pH [lower mid] : Male	6.8	Duodenum Endogenous Ion Calcium Min (mM)	0.1
		Abundance : ABCB11 (BSEP) PT Mean	0			Corneocyte pH [lower mid] CV (%) : Male	6.8	Duodenum Endogenous Ion Calcium Max (mM)	1.3
		Abundance : ABCB11 (BSEP) PT CV (%)	0			Corneocyte thickness [lower mid] µm : Male	0.6	Duodenum Endogenous Ion Generic Cation Mean (mM)	1
		Abundance : ABCB11 (BSEP) IT Mean	0			Corneocyte thickness [lower mid] CV (%) : Male	4	Duodenum Endogenous Ion Generic Cation CV (%)	0
		Abundance : ABCB11 (BSEP) IT CV (%)	0			Corneocyte width [lower mid] µm : Male	27.7	Duodenum Endogenous Ion Generic Cation Min (mM)	0.01
		Abundance : ABCB11 (BSEP) UT Mean	0			Corneocyte width [lower mid] CV (%) : Male	9.2	Duodenum Endogenous Ion Generic Cation Max (mM)	1000
		Abundance : ABCB11 (BSEP) UT CV (%)	0			Corneocyte length [lower mid] µm : Male	34.2	Duodenum Endogenous Ion Generic Anion Mean (mM)	1
		Absolute Abundance : ABCC2 (MRP2) (pmol/10^6 hepatocytes)	0.59			Corneocyte length [lower mid] CV (%) : Male	4.1	Duodenum Endogenous Ion Generic Anion CV (%)	0
		Abundance : ABCC2 (MRP2) ET Mean	1			Hydration level (% water volume) [lower mid] : Male	56.75	Duodenum Endogenous Ion Generic Anion Min (mM)	0.01
		Abundance : ABCC2 (MRP2) ET CV (%)	88			Hydration level (% water volume) [lower mid] CV (%) : Male	7	Duodenum Endogenous Ion Generic Anion Max (mM)	1000
		Abundance : ABCC2 (MRP2) PT Mean	0			SC lipid viscosity [lower mid] centipose : Male	75	Duodenum Fluid Viscosity Fasted (cP)	3
		Abundance : ABCC2 (MRP2) PT CV (%)	0			SC lipid viscosity [lower mid] CV (%) : Male	0	Duodenum Fluid Viscosity CV Fasted (%)	71
		Abundance : ABCC2 (MRP2) IT Mean	0			Corneocyte pH [bottom] : Male	6.8	Duodenum Fluid Viscosity Fed (cP)	65
		Abundance : ABCC2 (MRP2) IT CV (%)	0			Corneocyte pH [bottom] CV (%) : Male	6.8	Duodenum Fluid Viscosity CV Fed (%)	27
		Abundance : ABCC2 (MRP2) UT Mean	0			Corneocyte thickness [bottom] µm : Male	0.68	Duodenum CMC fasted (mM)	1
		Abundance : ABCC2 (MRP2) UT CV (%)	0			Corneocyte thickness [bottom] CV (%) : Male	4	Duodenum CMC fed (mM)	1
		Absolute Abundance : ABCC3 (MRP3) (pmol/10^6 hepatocytes)	0.239			Corneocyte width [bottom] µm : Male	27.7	Duodenum Bile fasted (mM)	3.31
		Abundance : ABCC3 (MRP3) ET Mean	1			Corneocyte width [bottom] CV (%) : Male	9.2	Duodenum Bile fasted CV (%)	97
		Abundance : ABCC3 (MRP3) ET CV (%)	65			Corneocyte length [bottom] µm : Male	34.2	Duodenum Bile fed (mM)	8.74
		Abundance : ABCC3 (MRP3) PT Mean	0			Corneocyte length [bottom] CV (%) : Male	4.1	Duodenum Bile fed CV (%)	79
		Abundance : ABCC3 (MRP3) PT CV (%)	0			Hydration level (% water volume) [bottom] : Male	67.4	Duodenum Channel Depth Mean (µm)	522.78
		Abundance : ABCC3 (MRP3) IT Mean	0			Hydration level (% water volume) [bottom] CV (%) : Male	4	Duodenum Channel Depth CV (%)	32.72
		Abundance : ABCC3 (MRP3) IT CV (%)	0			SC lipid viscosity [bottom] centipose : Male	75	Duodenum Channel Width Mean (µm)	28.03
		Abundance : ABCC3 (MRP3) UT Mean	0			SC lipid viscosity [bottom] CV (%) : Male	0	Duodenum Channel Width CV (%)	28.69
		Abundance : ABCC3 (MRP3) UT CV (%)	0			Viable Epidermis thickness µm : Male	46.8667	Duodenum Mean Thickness Mean (µm)	128.35
		Absolute Abundance : ABCC4 (MRP4) (pmol/10^6 hepatocytes)	0			Viable Epidermis thickness CV (%) : Male	24	Duodenum Mean Thickness CV (%)	8.1
		Abundance : ABCC4 (MRP4) ET Mean	1			Dermis thickness µm : Male	1580	Duodenum Fold Expansion Mean	1
		Abundance : ABCC4 (MRP4) ET CV (%)	60			Dermis thickness CV (%) : Male	20	Duodenum Fold Expansion CV (%)	0
		Abundance : ABCC4 (MRP4) PT Mean	0			Subcutis thickness mm : Male	1.91	Duodenum Pore Radius Mean	8.6
		Abundance : ABCC4 (MRP4) PT CV (%)	0			Subcutis thickness CV (%) : Male	55.7	Duodenum Pore Radius CV (%)	0
		Abundance : ABCC4 (MRP4) IT Mean	0			Muscle thickness mm : Male	13.2	Duodenum Unstirred Layer Thickness Mean (µm)	170
		Abundance : ABCC4 (MRP4) IT CV (%)	0			Muscle thickness CV (%) : Male	18	Duodenum Unstirred Layer Thickness CV (%)	22.35
		Abundance : ABCC4 (MRP4) UT Mean	0			Dermis regional blood flow scalar : Male	2.12619	Duodenum Unstirred Layer pH	6.5
		Abundance : ABCC4 (MRP4) UT CV (%)	0			Dermis regional blood flow scalar CV (%) : Male	0	Duodenum Unstirred Layer CV (%)	0.5
		Absolute Abundance : ABCC6 (MRP6) (pmol/10^6 hepatocytes)	0.214			Subcutis regional blood flow scalar : Male	1	Duodenum ABCB1 (P-gp/MDR1) (Relative values)	0.51
		Abundance : ABCC6 (MRP6) ET Mean	1			Subcutis regional blood flow scalar CV (%) : Male	0	Duodenum ABCC1 (MRP1) (Relative values)	0.45
		Abundance : ABCC6 (MRP6) ET CV (%)	46			Muscle regional blood flow scalar : Male	1	Duodenum ABCC2 (MRP2) (Relative values)	1.41
		Abundance : ABCC6 (MRP6) PT Mean	0			Muscle regional blood flow scalar CV (%) : Male	0	Duodenum ABCC3 (MRP3) (Relative values)	2.15
		Abundance : ABCC6 (MRP6) PT CV (%)	0					Duodenum ABCC4 (MRP4) (Relative values)	1.02
		Abundance : ABCC6 (MRP6) IT Mean	0			MPMLA - Lower Leg		Duodenum ABCG2 (BCRP) (Relative values)	0.68
		Abundance : ABCC6 (MRP6) IT CV (%)	0			Skin surface pH : Male	5.5	Duodenum SLC2A2 (GLUT2) (Relative values)	1
		Abundance : ABCC6 (MRP6) UT Mean	0			Skin surface pH CV (%) : Male	11	Duodenum SLC10A2 (ASBT/IBAT) (Relative values)	16.49
		Abundance : ABCC6 (MRP6) UT CV (%)	0			Skin temperature °C : Male	32	Duodenum SLC15A1 (PEPT1) (Relative values)	0.94
		Absolute Abundance : ABCG2 (BCRP) (pmol/10^6 hepatocytes)	0.103			Skin temperature CV (%) : Male	0	Duodenum SLC16A1 (MCT1) (Relative values)	1.25
		Abundance : ABCG2 (BCRP) ET Mean	1			Shape of corneocyte : Male	Cuboid (brick)	Duodenum SLCO2B1 (OATP2B1) (Relative values)	0.73
		Abundance : ABCG2 (BCRP) ET CV (%)	30			Shape of corneocyte : Female	Cuboid (brick)	Duodenum SLCO4C1 (OATP4C1) (Relative values)	1
		Abundance : ABCG2 (BCRP) PT Mean	0.37			Number of SC layers : Male	22	Duodenum SLC22A1 (OCT1) (Relative values)	1.03
		Abundance : ABCG2 (BCRP) PT CV (%)	30			Number of SC layers CV (%) : Male	9.1	Duodenum SLC22A3 (OCT3) (Relative values)	1.19
		Abundance : ABCG2 (BCRP) IT Mean	0.67			Water density gm/cm3 : Male	1	Duodenum SLC22A4 (OCTN1) (Relative values)	0.46
		Abundance : ABCG2 (BCRP) IT CV (%)	30			Water density CV (%) : Male	0	Duodenum SLC51A/B (OST-α/β) (Relative values)	0.56
		Abundance : ABCG2 (BCRP) UT Mean	0			SC lipids density gm/cm3 : Male	0.9	Duodenum Apical Influx (Intestine) (Relative values)	1
		Abundance : ABCG2 (BCRP) UT CV (%)	0			SC lipids density CV (%) : Male	0	Duodenum Apical Efflux (Intestine) (Relative values)	1
		Absolute Abundance : SLC10A1 (NTCP) (pmol/10^6 hepatocytes)	0.647			SC proteins density gm/cm3 : Male	1.37	Duodenum Basolateral Influx (Intestine) (Relative values)	1
		Abundance : SLC10A1 (NTCP) ET Mean	1			SC proteins density CV (%) : Male	0	Duodenum Basolateral Efflux (Intestine) (Relative values)	1
		Abundance : SLC10A1 (NTCP) ET CV (%)	50			Intercellular lipid thickness of SC µm : Male	0.091	Jejunum I Blood Flow (Qvilli %)	24.2
		Abundance : SLC10A1 (NTCP) PT Mean	0			Intercellular lipid thickness of SC CV (%) : Male	0	Jejunum I Transit Time (% Total)	17.3
		Abundance : SLC10A1 (NTCP) PT CV (%)	0			Tortuosity : Male	User Defined	Jejunum I CYP3A (% Total)	27.24
		Abundance : SLC10A1 (NTCP) IT Mean	0			Tortuosity of lipid diffusion pathway of SC : Male	12.7	Jejunum I S9PPI (% Total)	26.9
		Abundance : SLC10A1 (NTCP) IT CV (%)	0			Tortuosity of lipid diffusion pathway of SC CV (%) : Male	18	Jejunum I MPPI/CYP (% Total)	27.24
		Abundance : SLC10A1 (NTCP) UT Mean	0			Hair follicle diameter µm : Male	168.4	Jejunum I CPPI (% Total)	26.9
		Abundance : SLC10A1 (NTCP) UT CV (%)	0			Hair follicle diameter CV (%) : Male	26	Jejunum I pH High Fat Fed	6.5
		Absolute Abundance : SLC16A1 (MCT1) (pmol/10^6 hepatocytes)	0.638			Hair follicle density N/cm2 : Male	14	Jejunum I CV pH High Fat Fed (%)	13
		Abundance : SLC16A1 (MCT1) ET Mean	1			Hair follicle density CV (%) : Male	50	Jejunum I pH Fed	6.5
		Abundance : SLC16A1 (MCT1) ET CV (%)	60			Hair follicle depth µm : Male	613.5	Jejunum I CV pH Fed (%)	13
		Abundance : SLC16A1 (MCT1) PT Mean	0			Hair follicle depth CV (%) : Male	0	Jejunum I pH Low Fat Fed	6.5
		Abundance : SLC16A1 (MCT1) PT CV (%)	0			Hair shaft diameter µm : Male	42.1	Jejunum I CV pH Low Fat Fed (%)	13
		Abundance : SLC16A1 (MCT1) IT Mean	0			Hair shaft diameter CV (%) : Male	29	Jejunum I pH Fasted	6.5
		Abundance : SLC16A1 (MCT1) IT CV (%)	0			Sebum viscosity centipose : Male	40	Jejunum I CV pH Fasted (%)	13
		Abundance : SLC16A1 (MCT1) UT Mean	0			Sebum viscosity CV (%) : Male	0	Jejunum I Bicarbonate Buffer Concentration Fasted (mM)	9.94
		Abundance : SLC16A1 (MCT1) UT CV (%)	0			Corneocyte pH [top] : Male	6.8	Jejunum I Bicarbonate Buffer Concentration CV Fasted (%)	30
		Absolute Abundance : SLCO1B1 (OATP1B1) (pmol/10^6 hepatocytes)	3.1			Corneocyte pH [top] CV (%) : Male	6.8	Jejunum I Bicarbonate Buffer Concentration Fed (mM)	17.34
		Abundance : SLCO1B1 (OATP1B1) ET Mean	1			Corneocyte thickness [top] µm : Male	0.87	Jejunum I Bicarbonate Buffer Concentration CV Fed (%)	30
		Abundance : SLCO1B1 (OATP1B1) ET CV (%)	73			Corneocyte thickness [top] CV (%) : Male	9	Jejunum I Luminal Fluid Velocity Fasted (m/s)	0.0013
		Abundance : SLCO1B1 (OATP1B1) PT Mean	0.37			Corneocyte width [top] µm : Male	29.6	Jejunum I Luminal Fluid Velocity CV Fasted (%)	56
		Abundance : SLCO1B1 (OATP1B1) PT CV (%)	30			Corneocyte width [top] CV (%) : Male	5.9	Jejunum I Luminal Fluid Velocity Fed (m/s)	0.0013
		Abundance : SLCO1B1 (OATP1B1) IT Mean	0.68			Corneocyte length [top] µm : Male	36.4	Jejunum I Luminal Fluid Velocity CV Fed (%)	56
		Abundance : SLCO1B1 (OATP1B1) IT CV (%)	52			Corneocyte length [top] CV (%) : Male	5.7	Jejunum I Endogenous Ion Hydrochloric Mean (mM)	126
		Abundance : SLCO1B1 (OATP1B1) UT Mean	1.39			Hydration level (% water volume) [top] : Male	33.9	Jejunum I Endogenous Ion Hydrochloric CV (%)	15.1
		Abundance : SLCO1B1 (OATP1B1) UT CV (%)	62			Hydration level (% water volume) [top] CV (%) : Male	9	Jejunum I Endogenous Ion Hydrochloric Min (mM)	92
		Absolute Abundance : SLCO1B3 (OATP1B3) (pmol/10^6 hepatocytes)	3.08			SC lipid viscosity [top] centipose : Male	75	Jejunum I Endogenous Ion Hydrochloric Max (mM)	181
		Abundance : SLCO1B3 (OATP1B3) ET Mean	1			SC lipid viscosity [top] CV (%) : Male	0	Jejunum I Endogenous Ion Sodium Mean (mM)	142
		Abundance : SLCO1B3 (OATP1B3) ET CV (%)	89			Corneocyte pH [upper mid] : Male	6.8	Jejunum I Endogenous Ion Sodium CV (%)	9.2
		Abundance : SLCO1B3 (OATP1B3) PT Mean	0			Corneocyte pH [upper mid] CV (%) : Male	6.8	Jejunum I Endogenous Ion Sodium Min (mM)	111
		Abundance : SLCO1B3 (OATP1B3) PT CV (%)	0			Corneocyte thickness [upper mid] µm : Male	0.99	Jejunum I Endogenous Ion Sodium Max (mM)	165
		Abundance : SLCO1B3 (OATP1B3) IT Mean	0			Corneocyte thickness [upper mid] CV (%) : Male	9	Jejunum I Endogenous Ion Potassium Mean (mM)	5.4
		Abundance : SLCO1B3 (OATP1B3) IT CV (%)	0			Corneocyte width [upper mid] µm : Male	29.6	Jejunum I Endogenous Ion Potassium CV (%)	38.9
		Abundance : SLCO1B3 (OATP1B3) UT Mean	0			Corneocyte width [upper mid] CV (%) : Male	5.9	Jejunum I Endogenous Ion Potassium Min (mM)	1.7
		Abundance : SLCO1B3 (OATP1B3) UT CV (%)	0			Corneocyte length [upper mid] µm : Male	36.4	Jejunum I Endogenous Ion Potassium Max (mM)	11.6
		Absolute Abundance : SLCO2B1 (OATP2B1) (pmol/10^6 hepatocytes)	1.18			Corneocyte length [upper mid] CV (%) : Male	5.7	Jejunum I Endogenous Ion Calcium Mean (mM)	0.5
		Abundance : SLCO2B1 (OATP2B1) ET Mean	1			Hydration level (% water volume) [upper mid] : Male	44.6987	Jejunum I Endogenous Ion Calcium CV (%)	60
		Abundance : SLCO2B1 (OATP2B1) ET CV (%)	62			Hydration level (% water volume) [upper mid] CV (%) : Male	6	Jejunum I Endogenous Ion Calcium Min (mM)	0.1
		Abundance : SLCO2B1 (OATP2B1) PT Mean	0			SC lipid viscosity [upper mid] centipose : Male	75	Jejunum I Endogenous Ion Calcium Max (mM)	1.3
		Abundance : SLCO2B1 (OATP2B1) PT CV (%)	0			SC lipid viscosity [upper mid] CV (%) : Male	0	Jejunum I Endogenous Ion Generic Cation Mean (mM)	1
		Abundance : SLCO2B1 (OATP2B1) IT Mean	0			Corneocyte pH [lower mid] : Male	6.8	Jejunum I Endogenous Ion Generic Cation CV (%)	0
		Abundance : SLCO2B1 (OATP2B1) IT CV (%)	0			Corneocyte pH [lower mid] CV (%) : Male	6.8	Jejunum I Endogenous Ion Generic Cation Min (mM)	0.01
		Abundance : SLCO2B1 (OATP2B1) UT Mean	0			Corneocyte thickness [lower mid] µm : Male	1.13	Jejunum I Endogenous Ion Generic Cation Max (mM)	1000
		Abundance : SLCO2B1 (OATP2B1) UT CV (%)	0			Corneocyte thickness [lower mid] CV (%) : Male	9	Jejunum I Endogenous Ion Generic Anion Mean (mM)	1
		Absolute Abundance : SLC22A1 (OCT1) (pmol/10^6 hepatocytes)	1.27			Corneocyte width [lower mid] µm : Male	29.6	Jejunum I Endogenous Ion Generic Anion CV (%)	0
		Abundance : SLC22A1 (OCT1) ET Mean	1			Corneocyte width [lower mid] CV (%) : Male	5.9	Jejunum I Endogenous Ion Generic Anion Min (mM)	0.01
		Abundance : SLC22A1 (OCT1) ET CV (%)	44			Corneocyte length [lower mid] µm : Male	36.4	Jejunum I Endogenous Ion Generic Anion Max (mM)	1000
		Abundance : SLC22A1 (OCT1) PT Mean	0.01			Corneocyte length [lower mid] CV (%) : Male	5.7	Jejunum I Fluid Viscosity Fasted (cP)	3
		Abundance : SLC22A1 (OCT1) PT CV (%)	44			Hydration level (% water volume) [lower mid] : Male	55.5388	Jejunum I Fluid Viscosity CV Fasted (%)	71
		Abundance : SLC22A1 (OCT1) IT Mean	0.62			Hydration level (% water volume) [lower mid] CV (%) : Male	5	Jejunum I Fluid Viscosity Fed (cP)	33
		Abundance : SLC22A1 (OCT1) IT CV (%)	44			SC lipid viscosity [lower mid] centipose : Male	75	Jejunum I Fluid Viscosity CV Fed (%)	36
		Abundance : SLC22A1 (OCT1) UT Mean	1.14			SC lipid viscosity [lower mid] CV (%) : Male	0	Jejunum I CMC fasted (mM)	1
		Abundance : SLC22A1 (OCT1) UT CV (%)	44			Corneocyte pH [bottom] : Male	6.8	Jejunum I CMC fed (mM)	1
		Absolute Abundance : SLC22A7 (OAT2) (pmol/10^6 hepatocytes)	1.25			Corneocyte pH [bottom] CV (%) : Male	6.8	Jejunum I Bile fasted (mM)	2.3
		Abundance : SLC22A7 (OAT2) ET Mean	1			Corneocyte thickness [bottom] µm : Male	1.27	Jejunum I Bile fasted CV (%)	100
		Abundance : SLC22A7 (OAT2) ET CV (%)	75			Corneocyte thickness [bottom] CV (%) : Male	9	Jejunum I Bile fed (mM)	10.03
		Abundance : SLC22A7 (OAT2) PT Mean	0			Corneocyte width [bottom] µm : Male	29.6	Jejunum I Bile fed CV (%)	73
		Abundance : SLC22A7 (OAT2) PT CV (%)	0			Corneocyte width [bottom] CV (%) : Male	5.9	Jejunum I Channel Depth Mean (µm)	448.81
		Abundance : SLC22A7 (OAT2) IT Mean	0			Corneocyte length [bottom] µm : Male	36.4	Jejunum I Channel Depth CV (%)	21.82
		Abundance : SLC22A7 (OAT2) IT CV (%)	0			Corneocyte length [bottom] CV (%) : Male	5.7	Jejunum I Channel Width Mean (µm)	22.44
		Abundance : SLC22A7 (OAT2) UT Mean	0			Hydration level (% water volume) [bottom] : Male	66.4	Jejunum I Channel Width CV (%)	31.68
		Abundance : SLC22A7 (OAT2) UT CV (%)	0			Hydration level (% water volume) [bottom] CV (%) : Male	4	Jejunum I Mean Thickness Mean (µm)	137.7
		Absolute Abundance : SLC22A9 (OAT7) (pmol/10^6 hepatocytes)	1.45			SC lipid viscosity [bottom] centipose : Male	75	Jejunum I Mean Thickness CV (%)	14.42
		Abundance : SLC22A9 (OAT7) ET Mean	1			SC lipid viscosity [bottom] CV (%) : Male	0	Jejunum I Fold Expansion Mean	1.97
		Abundance : SLC22A9 (OAT7) ET CV (%)	51			Viable Epidermis thickness µm : Male	57.36	Jejunum I Fold Expansion CV (%)	24.54
		Abundance : SLC22A9 (OAT7) PT Mean	0			Viable Epidermis thickness CV (%) : Male	8	Jejunum I Pore Radius Mean	8.6
		Abundance : SLC22A9 (OAT7) PT CV (%)	0			Dermis thickness µm : Male	1240	Jejunum I Pore Radius CV (%)	0
		Abundance : SLC22A9 (OAT7) IT Mean	0			Dermis thickness CV (%) : Male	20	Jejunum I Unstirred Layer Thickness Mean (µm)	123
		Abundance : SLC22A9 (OAT7) IT CV (%)	0			Subcutis thickness mm : Male	9.62	Jejunum I Unstirred Layer Thickness CV (%)	3
		Abundance : SLC22A9 (OAT7) UT Mean	0			Subcutis thickness CV (%) : Male	48.3	Jejunum I Unstirred Layer pH	6.5
		Abundance : SLC22A9 (OAT7) UT CV (%)	0			Muscle thickness mm : Male	17.7	Jejunum I Unstirred Layer CV (%)	0.5
		Absolute Abundance : SLC29A1 (ENT1) (pmol/10^6 hepatocytes)	0.0646			Muscle thickness CV (%) : Male	22.67	Jejunum I ABCB1 (P-gp/MDR1) (pmol/mg total membrane protein)	0.4
		Abundance : SLC29A1 (ENT1) ET Mean	1			Dermis regional blood flow scalar : Male	0.839286	Jejunum I ABCC1 (MRP1) (pmol/mg total membrane protein)	0
		Abundance : SLC29A1 (ENT1) ET CV (%)	49			Dermis regional blood flow scalar CV (%) : Male	0	Jejunum I ABCC2 (MRP2) (pmol/mg total membrane protein)	0.86
		Abundance : SLC29A1 (ENT1) PT Mean	0			Subcutis regional blood flow scalar : Male	1	Jejunum I ABCC3 (MRP3) (pmol/mg total membrane protein)	0.58
		Abundance : SLC29A1 (ENT1) PT CV (%)	0			Subcutis regional blood flow scalar CV (%) : Male	0	Jejunum I ABCC4 (MRP4) (pmol/mg total membrane protein)	0
		Abundance : SLC29A1 (ENT1) IT Mean	0			Muscle regional blood flow scalar : Male	1	Jejunum I ABCG2 (BCRP) (pmol/mg total membrane protein)	0.34
		Abundance : SLC29A1 (ENT1) IT CV (%)	0			Muscle regional blood flow scalar CV (%) : Male	0	Jejunum I SLC2A2 (GLUT2) (pmol/mg total membrane protein)	0
		Abundance : SLC29A1 (ENT1) UT Mean	0					Jejunum I SLC10A2 (ASBT/IBAT) (pmol/mg total membrane protein)	0.01
		Abundance : SLC29A1 (ENT1) UT CV (%)	0			MPMLA - Thigh		Jejunum I SLC15A1 (PEPT1) (pmol/mg total membrane protein)	3.69
		Absolute Abundance : SLC29A2 (ENT2) (pmol/10^6 hepatocytes)	0			Skin surface pH : Male	5.5	Jejunum I SLC16A1 (MCT1) (pmol/mg total membrane protein)	0
		Abundance : SLC29A2 (ENT2) ET Mean	1			Skin surface pH CV (%) : Male	11	Jejunum I SLCO2B1 (OATP2B1) (pmol/mg total membrane protein)	0.4
		Abundance : SLC29A2 (ENT2) ET CV (%)	60			Skin temperature °C : Male	32	Jejunum I SLCO4C1 (OATP4C1) (pmol/mg total membrane protein)	0
		Abundance : SLC29A2 (ENT2) PT Mean	0			Skin temperature CV (%) : Male	0	Jejunum I SLC22A1 (OCT1) (pmol/mg total membrane protein)	0.65
		Abundance : SLC29A2 (ENT2) PT CV (%)	0			Shape of corneocyte : Male	Cuboid (brick)	Jejunum I SLC22A3 (OCT3) (pmol/mg total membrane protein)	0.06
		Abundance : SLC29A2 (ENT2) IT Mean	0			Shape of corneocyte : Female	Cuboid (brick)	Jejunum I SLC22A4 (OCTN1) (pmol/mg total membrane protein)	0
		Abundance : SLC29A2 (ENT2) IT CV (%)	0			Number of SC layers : Male	18	Jejunum I SLC51A/B (OST-α/β) (pmol/mg total membrane protein)	0.47
		Abundance : SLC29A2 (ENT2) UT Mean	0			Number of SC layers CV (%) : Male	25.3	Jejunum I Apical Influx (Intestine) (pmol/mg total membrane protein)	0
		Abundance : SLC29A2 (ENT2) UT CV (%)	0			Water density gm/cm3 : Male	1	Jejunum I Apical Efflux (Intestine) (pmol/mg total membrane protein)	0
		Absolute Abundance : SLC47A1 (MATE1) (pmol/10^6 hepatocytes)	0.146			Water density CV (%) : Male	0	Jejunum I Basolateral Influx (Intestine) (pmol/mg total membrane protein)	0
		Abundance : SLC47A1 (MATE1) ET Mean	1			SC lipids density gm/cm3 : Male	0.9	Jejunum I Basolateral Efflux (Intestine) (pmol/mg total membrane protein)	0
		Abundance : SLC47A1 (MATE1) ET CV (%)	51			SC lipids density CV (%) : Male	0	Jejunum I ABCB1 (P-gp/MDR1) (Relative values)	1
		Abundance : SLC47A1 (MATE1) PT Mean	0			SC proteins density gm/cm3 : Male	1.37	Jejunum I ABCC1 (MRP1) (Relative values)	1
		Abundance : SLC47A1 (MATE1) PT CV (%)	0			SC proteins density CV (%) : Male	0	Jejunum I ABCC2 (MRP2) (Relative values)	1
		Abundance : SLC47A1 (MATE1) IT Mean	0			Intercellular lipid thickness of SC µm : Male	0.091	Jejunum I ABCC3 (MRP3) (Relative values)	1
		Abundance : SLC47A1 (MATE1) IT CV (%)	0			Intercellular lipid thickness of SC CV (%) : Male	0	Jejunum I ABCC4 (MRP4) (Relative values)	1
		Abundance : SLC47A1 (MATE1) UT Mean	0			Tortuosity : Male	User Defined	Jejunum I ABCG2 (BCRP) (Relative values)	1
		Abundance : SLC47A1 (MATE1) UT CV (%)	0			Tortuosity of lipid diffusion pathway of SC : Male	12.7	Jejunum I SLC2A2 (GLUT2) (Relative values)	1
		Absolute Abundance : SLC51A/B (OST-α/β) (pmol/10^6 hepatocytes)	0			Tortuosity of lipid diffusion pathway of SC CV (%) : Male	18	Jejunum I SLC10A2 (ASBT/IBAT) (Relative values)	1
		Abundance : SLC51A/B (OST-α/β) ET Mean	1			Hair follicle diameter µm : Male	131.5	Jejunum I SLC15A1 (PEPT1) (Relative values)	1
		Abundance : SLC51A/B (OST-α/β) ET CV (%)	60			Hair follicle diameter CV (%) : Male	31	Jejunum I SLC16A1 (MCT1) (Relative values)	1
		Abundance : SLC51A/B (OST-α/β) PT Mean	0			Hair follicle density N/cm2 : Male	17	Jejunum I SLCO2B1 (OATP2B1) (Relative values)	1
		Abundance : SLC51A/B (OST-α/β) PT CV (%)	0			Hair follicle density CV (%) : Male	24	Jejunum I SLCO4C1 (OATP4C1) (Relative values)	1
		Abundance : SLC51A/B (OST-α/β) IT Mean	0			Hair follicle depth µm : Male	315.1	Jejunum I SLC22A1 (OCT1) (Relative values)	1
		Abundance : SLC51A/B (OST-α/β) IT CV (%)	0			Hair follicle depth CV (%) : Male	0	Jejunum I SLC22A3 (OCT3) (Relative values)	1
		Abundance : SLC51A/B (OST-α/β) UT Mean	0			Hair shaft diameter µm : Male	29.2	Jejunum I SLC22A4 (OCTN1) (Relative values)	1
		Abundance : SLC51A/B (OST-α/β) UT CV (%)	0			Hair shaft diameter CV (%) : Male	41	Jejunum I SLC51A/B (OST-α/β) (Relative values)	1
		Absolute Abundance : Sinusoidal Uptake (Liver) (pmol/10^6 hepatocytes)	0			Sebum viscosity centipose : Male	40	Jejunum I Apical Influx (Intestine) (Relative values)	1
		Abundance : Sinusoidal Uptake (Liver) ET Mean	1			Sebum viscosity CV (%) : Male	0	Jejunum I Apical Efflux (Intestine) (Relative values)	1
		Abundance : Sinusoidal Uptake (Liver) ET CV (%)	0			Corneocyte pH [top] : Male	6.8	Jejunum I Basolateral Influx (Intestine) (Relative values)	1
		Abundance : Sinusoidal Uptake (Liver) PT Mean	0			Corneocyte pH [top] CV (%) : Male	6.8	Jejunum I Basolateral Efflux (Intestine) (Relative values)	1
		Abundance : Sinusoidal Uptake (Liver) PT CV (%)	0			Corneocyte thickness [top] µm : Male	0.87	Jejunum II Blood Flow (Qvilli %)	24.2
		Abundance : Sinusoidal Uptake (Liver) IT Mean	0			Corneocyte thickness [top] CV (%) : Male	26	Jejunum II Transit Time (% Total)	17.3
		Abundance : Sinusoidal Uptake (Liver) IT CV (%)	0			Corneocyte width [top] µm : Male	34	Jejunum II CYP3A (% Total)	27.24
		Abundance : Sinusoidal Uptake (Liver) UT Mean	0			Corneocyte width [top] CV (%) : Male	15.1	Jejunum II S9PPI (% Total)	26.9
		Abundance : Sinusoidal Uptake (Liver) UT CV (%)	0			Corneocyte length [top] µm : Male	40.7	Jejunum II MPPI/CYP (% Total)	27.24
		Absolute Abundance : Sinusoidal Efflux (Liver) (pmol/10^6 hepatocytes)	0			Corneocyte length [top] CV (%) : Male	14.6	Jejunum II CPPI (% Total)	26.9
		Abundance : Sinusoidal Efflux (Liver) ET Mean	1			Hydration level (% water volume) [top] : Male	33.9	Jejunum II pH High Fat Fed	6.6
		Abundance : Sinusoidal Efflux (Liver) ET CV (%)	0			Hydration level (% water volume) [top] CV (%) : Male	9	Jejunum II CV pH High Fat Fed (%)	11
		Abundance : Sinusoidal Efflux (Liver) PT Mean	0			SC lipid viscosity [top] centipose : Male	75	Jejunum II pH Fed	6.6
		Abundance : Sinusoidal Efflux (Liver) PT CV (%)	0			SC lipid viscosity [top] CV (%) : Male	0	Jejunum II CV pH Fed (%)	11
		Abundance : Sinusoidal Efflux (Liver) IT Mean	0			Corneocyte pH [upper mid] : Male	6.8	Jejunum II pH Low Fat Fed	6.6
		Abundance : Sinusoidal Efflux (Liver) IT CV (%)	0			Corneocyte pH [upper mid] CV (%) : Male	6.8	Jejunum II CV pH Low Fat Fed (%)	11
		Abundance : Sinusoidal Efflux (Liver) UT Mean	0			Corneocyte thickness [upper mid] µm : Male	0.75	Jejunum II pH Fasted	6.6
		Abundance : Sinusoidal Efflux (Liver) UT CV (%)	0			Corneocyte thickness [upper mid] CV (%) : Male	26	Jejunum II CV pH Fasted (%)	11
		Absolute Abundance : Canalicular Efflux (Liver) (pmol/10^6 hepatocytes)	0			Corneocyte width [upper mid] µm : Male	34	Jejunum II Bicarbonate Buffer Concentration Fasted (mM)	9.94
		Abundance : Canalicular Efflux (Liver) ET Mean	1			Corneocyte width [upper mid] CV (%) : Male	15.1	Jejunum II Bicarbonate Buffer Concentration CV Fasted (%)	30
		Abundance : Canalicular Efflux (Liver) ET CV (%)	0			Corneocyte length [upper mid] µm : Male	40.7	Jejunum II Bicarbonate Buffer Concentration Fed (mM)	17.34
		Abundance : Canalicular Efflux (Liver) PT Mean	0			Corneocyte length [upper mid] CV (%) : Male	14.6	Jejunum II Bicarbonate Buffer Concentration CV Fed (%)	30
		Abundance : Canalicular Efflux (Liver) PT CV (%)	0			Hydration level (% water volume) [upper mid] : Male	44.6987	Jejunum II Luminal Fluid Velocity Fasted (m/s)	0.0013
		Abundance : Canalicular Efflux (Liver) IT Mean	0			Hydration level (% water volume) [upper mid] CV (%) : Male	6	Jejunum II Luminal Fluid Velocity CV Fasted (%)	56
		Abundance : Canalicular Efflux (Liver) IT CV (%)	0			SC lipid viscosity [upper mid] centipose : Male	75	Jejunum II Luminal Fluid Velocity Fed (m/s)	0.0013
		Abundance : Canalicular Efflux (Liver) UT Mean	0			SC lipid viscosity [upper mid] CV (%) : Male	0	Jejunum II Luminal Fluid Velocity CV Fed (%)	56
		Abundance : Canalicular Efflux (Liver) UT CV (%)	0			Corneocyte pH [lower mid] : Male	6.8	Jejunum II Endogenous Ion Hydrochloric Mean (mM)	126
						Corneocyte pH [lower mid] CV (%) : Male	6.8	Jejunum II Endogenous Ion Hydrochloric CV (%)	15.1
						Corneocyte thickness [lower mid] µm : Male	0.85	Jejunum II Endogenous Ion Hydrochloric Min (mM)	92
						Corneocyte thickness [lower mid] CV (%) : Male	26	Jejunum II Endogenous Ion Hydrochloric Max (mM)	181
						Corneocyte width [lower mid] µm : Male	34	Jejunum II Endogenous Ion Sodium Mean (mM)	142
						Corneocyte width [lower mid] CV (%) : Male	15.1	Jejunum II Endogenous Ion Sodium CV (%)	9.2
						Corneocyte length [lower mid] µm : Male	40.7	Jejunum II Endogenous Ion Sodium Min (mM)	111
						Corneocyte length [lower mid] CV (%) : Male	14.6	Jejunum II Endogenous Ion Sodium Max (mM)	165
						Hydration level (% water volume) [lower mid] : Male	55.5388	Jejunum II Endogenous Ion Potassium Mean (mM)	5.4
						Hydration level (% water volume) [lower mid] CV (%) : Male	5	Jejunum II Endogenous Ion Potassium CV (%)	38.9
						SC lipid viscosity [lower mid] centipose : Male	75	Jejunum II Endogenous Ion Potassium Min (mM)	1.7
						SC lipid viscosity [lower mid] CV (%) : Male	0	Jejunum II Endogenous Ion Potassium Max (mM)	11.6
						Corneocyte pH [bottom] : Male	6.8	Jejunum II Endogenous Ion Calcium Mean (mM)	0.5
						Corneocyte pH [bottom] CV (%) : Male	6.8	Jejunum II Endogenous Ion Calcium CV (%)	60
						Corneocyte thickness [bottom] µm : Male	0.96	Jejunum II Endogenous Ion Calcium Min (mM)	0.1
						Corneocyte thickness [bottom] CV (%) : Male	26	Jejunum II Endogenous Ion Calcium Max (mM)	1.3
						Corneocyte width [bottom] µm : Male	34	Jejunum II Endogenous Ion Generic Cation Mean (mM)	1
						Corneocyte width [bottom] CV (%) : Male	15.1	Jejunum II Endogenous Ion Generic Cation CV (%)	0
						Corneocyte length [bottom] µm : Male	40.7	Jejunum II Endogenous Ion Generic Cation Min (mM)	0.01
						Corneocyte length [bottom] CV (%) : Male	14.6	Jejunum II Endogenous Ion Generic Cation Max (mM)	1000
						Hydration level (% water volume) [bottom] : Male	66.4	Jejunum II Endogenous Ion Generic Anion Mean (mM)	1
						Hydration level (% water volume) [bottom] CV (%) : Male	4	Jejunum II Endogenous Ion Generic Anion CV (%)	0
						SC lipid viscosity [bottom] centipose : Male	75	Jejunum II Endogenous Ion Generic Anion Min (mM)	0.01
						SC lipid viscosity [bottom] CV (%) : Male	0	Jejunum II Endogenous Ion Generic Anion Max (mM)	1000
						Viable Epidermis thickness µm : Male	40	Jejunum II Fluid Viscosity Fasted (cP)	3
						Viable Epidermis thickness CV (%) : Male	19	Jejunum II Fluid Viscosity CV Fasted (%)	71
						Dermis thickness µm : Male	1240	Jejunum II Fluid Viscosity Fed (cP)	12
						Dermis thickness CV (%) : Male	20	Jejunum II Fluid Viscosity CV Fed (%)	14
						Subcutis thickness mm : Male	9.62	Jejunum II CMC fasted (mM)	1
						Subcutis thickness CV (%) : Male	48.3	Jejunum II CMC fed (mM)	1
						Muscle thickness mm : Male	32.81	Jejunum II Bile fasted (mM)	3.55
						Muscle thickness CV (%) : Male	38.03	Jejunum II Bile fasted CV (%)	42
						Dermis regional blood flow scalar : Male	0.839286	Jejunum II Bile fed (mM)	4.79
						Dermis regional blood flow scalar CV (%) : Male	0	Jejunum II Bile fed CV (%)	66
						Subcutis regional blood flow scalar : Male	1	Jejunum II Channel Depth Mean (µm)	448.81
						Subcutis regional blood flow scalar CV (%) : Male	0	Jejunum II Channel Depth CV (%)	21.82
						Muscle regional blood flow scalar : Male	1	Jejunum II Channel Width Mean (µm)	22.44
						Muscle regional blood flow scalar CV (%) : Male	0	Jejunum II Channel Width CV (%)	31.68
								Jejunum II Mean Thickness Mean (µm)	137.7
						MPMLA - Back		Jejunum II Mean Thickness CV (%)	14.42
						Skin surface pH : Male	5.2	Jejunum II Fold Expansion Mean	1.38
						Skin surface pH CV (%) : Male	8.4	Jejunum II Fold Expansion CV (%)	20.19
						Skin temperature °C : Male	32	Jejunum II Pore Radius Mean	8.6
						Skin temperature CV (%) : Male	0	Jejunum II Pore Radius CV (%)	0
						Shape of corneocyte : Male	Cuboid (brick)	Jejunum II Unstirred Layer Thickness Mean (µm)	123
						Shape of corneocyte : Female	Cuboid (brick)	Jejunum II Unstirred Layer Thickness CV (%)	3
						Number of SC layers : Male	17	Jejunum II Unstirred Layer pH	6.5
						Number of SC layers CV (%) : Male	23.7	Jejunum II Unstirred Layer CV (%)	0.5
						Water density gm/cm3 : Male	1	Jejunum II ABCB1 (P-gp/MDR1) (Relative values)	1.46
						Water density CV (%) : Male	0	Jejunum II ABCC1 (MRP1) (Relative values)	0.88
						SC lipids density gm/cm3 : Male	0.9	Jejunum II ABCC2 (MRP2) (Relative values)	1
						SC lipids density CV (%) : Male	0	Jejunum II ABCC3 (MRP3) (Relative values)	0.89
						SC proteins density gm/cm3 : Male	1.37	Jejunum II ABCC4 (MRP4) (Relative values)	1.22
						SC proteins density CV (%) : Male	0	Jejunum II ABCG2 (BCRP) (Relative values)	1
						Intercellular lipid thickness of SC µm : Male	0.091	Jejunum II SLC2A2 (GLUT2) (Relative values)	1
						Intercellular lipid thickness of SC CV (%) : Male	0	Jejunum II SLC10A2 (ASBT/IBAT) (Relative values)	4
						Tortuosity : Male	User Defined	Jejunum II SLC15A1 (PEPT1) (Relative values)	1.06
						Tortuosity of lipid diffusion pathway of SC : Male	12.7	Jejunum II SLC16A1 (MCT1) (Relative values)	1
						Tortuosity of lipid diffusion pathway of SC CV (%) : Male	18	Jejunum II SLCO2B1 (OATP2B1) (Relative values)	0.94
						Hair follicle diameter µm : Male	105.3	Jejunum II SLCO4C1 (OATP4C1) (Relative values)	1
						Hair follicle diameter CV (%) : Male	60	Jejunum II SLC22A1 (OCT1) (Relative values)	0.87
						Hair follicle density N/cm2 : Male	29	Jejunum II SLC22A3 (OCT3) (Relative values)	1.11
						Hair follicle density CV (%) : Male	31	Jejunum II SLC22A4 (OCTN1) (Relative values)	0.63
						Hair follicle depth µm : Male	446.5	Jejunum II SLC51A/B (OST-α/β) (Relative values)	1.89
						Hair follicle depth CV (%) : Male	0	Jejunum II Apical Influx (Intestine) (Relative values)	1
						Hair shaft diameter µm : Male	18.2	Jejunum II Apical Efflux (Intestine) (Relative values)	1
						Hair shaft diameter CV (%) : Male	37	Jejunum II Basolateral Influx (Intestine) (Relative values)	1
						Sebum viscosity centipose : Male	40	Jejunum II Basolateral Efflux (Intestine) (Relative values)	1
						Sebum viscosity CV (%) : Male	0	Ileum I Blood Flow (Qvilli %)	10.7
						Corneocyte pH [top] : Male	6.8	Ileum I Transit Time (% Total)	15.2
						Corneocyte pH [top] CV (%) : Male	6.8	Ileum I CYP3A (% Total)	7.94
						Corneocyte thickness [top] µm : Male	0.59	Ileum I S9PPI (% Total)	7.83
						Corneocyte thickness [top] CV (%) : Male	30	Ileum I MPPI/CYP (% Total)	7.94
						Corneocyte width [top] µm : Male	29.6	Ileum I CPPI (% Total)	7.83
						Corneocyte width [top] CV (%) : Male	5.9	Ileum I pH High Fat Fed	6.8
						Corneocyte length [top] µm : Male	36.4	Ileum I CV pH High Fat Fed (%)	10
						Corneocyte length [top] CV (%) : Male	5.7	Ileum I pH Fed	6.8
						Hydration level (% water volume) [top] : Male	33.9	Ileum I CV pH Fed (%)	10
						Hydration level (% water volume) [top] CV (%) : Male	9	Ileum I pH Low Fat Fed	6.8
						SC lipid viscosity [top] centipose : Male	75	Ileum I CV pH Low Fat Fed (%)	10
						SC lipid viscosity [top] CV (%) : Male	0	Ileum I pH Fasted	6.8
						Corneocyte pH [upper mid] : Male	6.8	Ileum I CV pH Fasted (%)	10
						Corneocyte pH [upper mid] CV (%) : Male	6.8	Ileum I Bicarbonate Buffer Concentration Fasted (mM)	30
						Corneocyte thickness [upper mid] µm : Male	0.67	Ileum I Bicarbonate Buffer Concentration CV Fasted (%)	30
						Corneocyte thickness [upper mid] CV (%) : Male	30	Ileum I Bicarbonate Buffer Concentration Fed (mM)	30
						Corneocyte width [upper mid] µm : Male	29.6	Ileum I Bicarbonate Buffer Concentration CV Fed (%)	30
						Corneocyte width [upper mid] CV (%) : Male	5.9	Ileum I Luminal Fluid Velocity Fasted (m/s)	0.0013
						Corneocyte length [upper mid] µm : Male	36.4	Ileum I Luminal Fluid Velocity CV Fasted (%)	56
						Corneocyte length [upper mid] CV (%) : Male	5.7	Ileum I Luminal Fluid Velocity Fed (m/s)	0.0013
						Hydration level (% water volume) [upper mid] : Male	44.6987	Ileum I Luminal Fluid Velocity CV Fed (%)	56
						Hydration level (% water volume) [upper mid] CV (%) : Male	6	Ileum I Endogenous Ion Hydrochloric Mean (mM)	113.3
						SC lipid viscosity [upper mid] centipose : Male	75	Ileum I Endogenous Ion Hydrochloric CV (%)	15.1
						SC lipid viscosity [upper mid] CV (%) : Male	0	Ileum I Endogenous Ion Hydrochloric Min (mM)	80.4
						Corneocyte pH [lower mid] : Male	6.8	Ileum I Endogenous Ion Hydrochloric Max (mM)	157.5
						Corneocyte pH [lower mid] CV (%) : Male	6.8	Ileum I Endogenous Ion Sodium Mean (mM)	136.3
						Corneocyte thickness [lower mid] µm : Male	0.76	Ileum I Endogenous Ion Sodium CV (%)	9.2
						Corneocyte thickness [lower mid] CV (%) : Male	30	Ileum I Endogenous Ion Sodium Min (mM)	107.4
						Corneocyte width [lower mid] µm : Male	29.6	Ileum I Endogenous Ion Sodium Max (mM)	171.8
						Corneocyte width [lower mid] CV (%) : Male	5.9	Ileum I Endogenous Ion Potassium Mean (mM)	6.1
						Corneocyte length [lower mid] µm : Male	36.4	Ileum I Endogenous Ion Potassium CV (%)	38.9
						Corneocyte length [lower mid] CV (%) : Male	5.7	Ileum I Endogenous Ion Potassium Min (mM)	4.6
						Hydration level (% water volume) [lower mid] : Male	55.5388	Ileum I Endogenous Ion Potassium Max (mM)	8
						Hydration level (% water volume) [lower mid] CV (%) : Male	5	Ileum I Endogenous Ion Calcium Mean (mM)	0.5
						SC lipid viscosity [lower mid] centipose : Male	75	Ileum I Endogenous Ion Calcium CV (%)	60
						SC lipid viscosity [lower mid] CV (%) : Male	0	Ileum I Endogenous Ion Calcium Min (mM)	0.1
						Corneocyte pH [bottom] : Male	6.8	Ileum I Endogenous Ion Calcium Max (mM)	1.3
						Corneocyte pH [bottom] CV (%) : Male	6.8	Ileum I Endogenous Ion Generic Cation Mean (mM)	1
						Corneocyte thickness [bottom] µm : Male	0.86	Ileum I Endogenous Ion Generic Cation CV (%)	0
						Corneocyte thickness [bottom] CV (%) : Male	30	Ileum I Endogenous Ion Generic Cation Min (mM)	0.01
						Corneocyte width [bottom] µm : Male	29.6	Ileum I Endogenous Ion Generic Cation Max (mM)	1000
						Corneocyte width [bottom] CV (%) : Male	5.9	Ileum I Endogenous Ion Generic Anion Mean (mM)	1
						Corneocyte length [bottom] µm : Male	36.4	Ileum I Endogenous Ion Generic Anion CV (%)	0
						Corneocyte length [bottom] CV (%) : Male	5.7	Ileum I Endogenous Ion Generic Anion Min (mM)	0.01
						Hydration level (% water volume) [bottom] : Male	66.4	Ileum I Endogenous Ion Generic Anion Max (mM)	1000
						Hydration level (% water volume) [bottom] CV (%) : Male	4	Ileum I Fluid Viscosity Fasted (cP)	3
						SC lipid viscosity [bottom] centipose : Male	75	Ileum I Fluid Viscosity CV Fasted (%)	71
						SC lipid viscosity [bottom] CV (%) : Male	0	Ileum I Fluid Viscosity Fed (cP)	9
						Viable Epidermis thickness µm : Male	45.655	Ileum I Fluid Viscosity CV Fed (%)	2
						Viable Epidermis thickness CV (%) : Male	15	Ileum I CMC fasted (mM)	1
						Dermis thickness µm : Male	1240	Ileum I CMC fed (mM)	1
						Dermis thickness CV (%) : Male	20	Ileum I Bile fasted (mM)	1.25
						Subcutis thickness mm : Male	6.93	Ileum I Bile fasted CV (%)	30
						Subcutis thickness CV (%) : Male	34.9	Ileum I Bile fed (mM)	5.86
						Muscle thickness mm : Male	19.3	Ileum I Bile fed CV (%)	84
						Muscle thickness CV (%) : Male	6.22	Ileum I Channel Depth Mean (µm)	289.94
						Dermis regional blood flow scalar : Male	1.03512	Ileum I Channel Depth CV (%)	49.37
						Dermis regional blood flow scalar CV (%) : Male	0	Ileum I Channel Width Mean (µm)	56.19
						Subcutis regional blood flow scalar : Male	1	Ileum I Channel Width CV (%)	30
						Subcutis regional blood flow scalar CV (%) : Male	0	Ileum I Mean Thickness Mean (µm)	127
						Muscle regional blood flow scalar : Male	1	Ileum I Mean Thickness CV (%)	30
						Muscle regional blood flow scalar CV (%) : Male	0	Ileum I Fold Expansion Mean	1.1
								Ileum I Fold Expansion CV (%)	9.15
						MPMLA - Physiology B		Ileum I Pore Radius Mean	8.6
						Skin surface pH : Male	0	Ileum I Pore Radius CV (%)	0
						Skin surface pH CV (%) : Male	0	Ileum I Unstirred Layer Thickness Mean (µm)	480
						Skin temperature °C : Male	0	Ileum I Unstirred Layer Thickness CV (%)	10
						Skin temperature CV (%) : Male	0	Ileum I Unstirred Layer pH	6.5
						Shape of corneocyte : Male	Cuboid (brick)	Ileum I Unstirred Layer CV (%)	0.5
						Shape of corneocyte : Female	Cuboid (brick)	Ileum I ABCB1 (P-gp/MDR1) (Relative values)	1.5
						Number of SC layers : Male	0	Ileum I ABCC1 (MRP1) (Relative values)	0.86
						Number of SC layers CV (%) : Male	0	Ileum I ABCC2 (MRP2) (Relative values)	0.6
						Water density gm/cm3 : Male	0	Ileum I ABCC3 (MRP3) (Relative values)	1.54
						Water density CV (%) : Male	0	Ileum I ABCC4 (MRP4) (Relative values)	1.71
						SC lipids density gm/cm3 : Male	0	Ileum I ABCG2 (BCRP) (Relative values)	0.78
						SC lipids density CV (%) : Male	0	Ileum I SLC2A2 (GLUT2) (Relative values)	1
						SC proteins density gm/cm3 : Male	0	Ileum I SLC10A2 (ASBT/IBAT) (Relative values)	98.44
						SC proteins density CV (%) : Male	0	Ileum I SLC15A1 (PEPT1) (Relative values)	1.23
						Intercellular lipid thickness of SC µm : Male	0	Ileum I SLC16A1 (MCT1) (Relative values)	1.29
						Intercellular lipid thickness of SC CV (%) : Male	0	Ileum I SLCO2B1 (OATP2B1) (Relative values)	1.28
						Tortuosity : Male	User Defined	Ileum I SLCO4C1 (OATP4C1) (Relative values)	1
						Tortuosity of lipid diffusion pathway of SC : Male	0	Ileum I SLC22A1 (OCT1) (Relative values)	1.29
						Tortuosity of lipid diffusion pathway of SC CV (%) : Male	0	Ileum I SLC22A3 (OCT3) (Relative values)	1.08
						Hair follicle diameter µm : Male	0	Ileum I SLC22A4 (OCTN1) (Relative values)	0.78
						Hair follicle diameter CV (%) : Male	0	Ileum I SLC51A/B (OST-α/β) (Relative values)	1.08
						Hair follicle density N/cm2 : Male	0	Ileum I Apical Influx (Intestine) (Relative values)	1
						Hair follicle density CV (%) : Male	0	Ileum I Apical Efflux (Intestine) (Relative values)	1
						Hair follicle depth µm : Male	0	Ileum I Basolateral Influx (Intestine) (Relative values)	1
						Hair follicle depth CV (%) : Male	0	Ileum I Basolateral Efflux (Intestine) (Relative values)	1
						Hair shaft diameter µm : Male	0	Ileum II Blood Flow (Qvilli %)	10.7
						Hair shaft diameter CV (%) : Male	0	Ileum II Transit Time (% Total)	15.2
						Sebum viscosity centipose : Male	0	Ileum II CYP3A (% Total)	7.94
						Sebum viscosity CV (%) : Male	0	Ileum II S9PPI (% Total)	7.83
						Corneocyte pH [top] : Male	0	Ileum II MPPI/CYP (% Total)	7.94
						Corneocyte pH [top] CV (%) : Male	0	Ileum II CPPI (% Total)	7.83
						Corneocyte thickness [top] µm : Male	0	Ileum II pH High Fat Fed	7
						Corneocyte thickness [top] CV (%) : Male	0	Ileum II CV pH High Fat Fed (%)	10
						Corneocyte width [top] µm : Male	0	Ileum II pH Fed	7
						Corneocyte width [top] CV (%) : Male	0	Ileum II CV pH Fed (%)	10
						Corneocyte length [top] µm : Male	0	Ileum II pH Low Fat Fed	7
						Corneocyte length [top] CV (%) : Male	0	Ileum II CV pH Low Fat Fed (%)	10
						Hydration level (% water volume) [top] : Male	0	Ileum II pH Fasted	7
						Hydration level (% water volume) [top] CV (%) : Male	0	Ileum II CV pH Fasted (%)	10
						SC lipid viscosity [top] centipose : Male	0	Ileum II Bicarbonate Buffer Concentration Fasted (mM)	30
						SC lipid viscosity [top] CV (%) : Male	0	Ileum II Bicarbonate Buffer Concentration CV Fasted (%)	30
						Corneocyte pH [upper mid] : Male	0	Ileum II Bicarbonate Buffer Concentration Fed (mM)	30
						Corneocyte pH [upper mid] CV (%) : Male	0	Ileum II Bicarbonate Buffer Concentration CV Fed (%)	30
						Corneocyte thickness [upper mid] µm : Male	0	Ileum II Luminal Fluid Velocity Fasted (m/s)	0.0013
						Corneocyte thickness [upper mid] CV (%) : Male	0	Ileum II Luminal Fluid Velocity CV Fasted (%)	56
						Corneocyte width [upper mid] µm : Male	0	Ileum II Luminal Fluid Velocity Fed (m/s)	0.0013
						Corneocyte width [upper mid] CV (%) : Male	0	Ileum II Luminal Fluid Velocity CV Fed (%)	56
						Corneocyte length [upper mid] µm : Male	0	Ileum II Endogenous Ion Hydrochloric Mean (mM)	100.5
						Corneocyte length [upper mid] CV (%) : Male	0	Ileum II Endogenous Ion Hydrochloric CV (%)	15.1
						Hydration level (% water volume) [upper mid] : Male	0	Ileum II Endogenous Ion Hydrochloric Min (mM)	71.4
						Hydration level (% water volume) [upper mid] CV (%) : Male	0	Ileum II Endogenous Ion Hydrochloric Max (mM)	139.7
						SC lipid viscosity [upper mid] centipose : Male	0	Ileum II Endogenous Ion Sodium Mean (mM)	130.5
						SC lipid viscosity [upper mid] CV (%) : Male	0	Ileum II Endogenous Ion Sodium CV (%)	9.2
						Corneocyte pH [lower mid] : Male	0	Ileum II Endogenous Ion Sodium Min (mM)	102.8
						Corneocyte pH [lower mid] CV (%) : Male	0	Ileum II Endogenous Ion Sodium Max (mM)	164.6
						Corneocyte thickness [lower mid] µm : Male	0	Ileum II Endogenous Ion Potassium Mean (mM)	6.7
						Corneocyte thickness [lower mid] CV (%) : Male	0	Ileum II Endogenous Ion Potassium CV (%)	38.9
						Corneocyte width [lower mid] µm : Male	0	Ileum II Endogenous Ion Potassium Min (mM)	5
						Corneocyte width [lower mid] CV (%) : Male	0	Ileum II Endogenous Ion Potassium Max (mM)	8.8
						Corneocyte length [lower mid] µm : Male	0	Ileum II Endogenous Ion Calcium Mean (mM)	0.5
						Corneocyte length [lower mid] CV (%) : Male	0	Ileum II Endogenous Ion Calcium CV (%)	60
						Hydration level (% water volume) [lower mid] : Male	0	Ileum II Endogenous Ion Calcium Min (mM)	0.1
						Hydration level (% water volume) [lower mid] CV (%) : Male	0	Ileum II Endogenous Ion Calcium Max (mM)	1.3
						SC lipid viscosity [lower mid] centipose : Male	0	Ileum II Endogenous Ion Generic Cation Mean (mM)	1
						SC lipid viscosity [lower mid] CV (%) : Male	0	Ileum II Endogenous Ion Generic Cation CV (%)	0
						Corneocyte pH [bottom] : Male	0	Ileum II Endogenous Ion Generic Cation Min (mM)	0.01
						Corneocyte pH [bottom] CV (%) : Male	0	Ileum II Endogenous Ion Generic Cation Max (mM)	1000
						Corneocyte thickness [bottom] µm : Male	0	Ileum II Endogenous Ion Generic Anion Mean (mM)	1
						Corneocyte thickness [bottom] CV (%) : Male	0	Ileum II Endogenous Ion Generic Anion CV (%)	0
						Corneocyte width [bottom] µm : Male	0	Ileum II Endogenous Ion Generic Anion Min (mM)	0.01
						Corneocyte width [bottom] CV (%) : Male	0	Ileum II Endogenous Ion Generic Anion Max (mM)	1000
						Corneocyte length [bottom] µm : Male	0	Ileum II Fluid Viscosity Fasted (cP)	3
						Corneocyte length [bottom] CV (%) : Male	0	Ileum II Fluid Viscosity CV Fasted (%)	71
						Hydration level (% water volume) [bottom] : Male	0	Ileum II Fluid Viscosity Fed (cP)	3
						Hydration level (% water volume) [bottom] CV (%) : Male	0	Ileum II Fluid Viscosity CV Fed (%)	71
						SC lipid viscosity [bottom] centipose : Male	0	Ileum II CMC fasted (mM)	1
						SC lipid viscosity [bottom] CV (%) : Male	0	Ileum II CMC fed (mM)	1
						Viable Epidermis thickness µm : Male	0	Ileum II Bile fasted (mM)	1.25
						Viable Epidermis thickness CV (%) : Male	0	Ileum II Bile fasted CV (%)	30
						Dermis thickness µm : Male	0	Ileum II Bile fed (mM)	8.61
						Dermis thickness CV (%) : Male	0	Ileum II Bile fed CV (%)	88
						Subcutis thickness mm : Male	0	Ileum II Channel Depth Mean (µm)	289.94
						Subcutis thickness CV (%) : Male	0	Ileum II Channel Depth CV (%)	49.37
						Muscle thickness mm : Male	0	Ileum II Channel Width Mean (µm)	56.19
						Muscle thickness CV (%) : Male	0	Ileum II Channel Width CV (%)	30
						Dermis regional blood flow scalar : Male	0	Ileum II Mean Thickness Mean (µm)	127
						Dermis regional blood flow scalar CV (%) : Male	0	Ileum II Mean Thickness CV (%)	30
						Subcutis regional blood flow scalar : Male	0	Ileum II Fold Expansion Mean	1.1
						Subcutis regional blood flow scalar CV (%) : Male	0	Ileum II Fold Expansion CV (%)	9.15
						Muscle regional blood flow scalar : Male	0	Ileum II Pore Radius Mean	8.6
						Muscle regional blood flow scalar CV (%) : Male	0	Ileum II Pore Radius CV (%)	0
								Ileum II Unstirred Layer Thickness Mean (µm)	480
						MPMLA - Forehead		Ileum II Unstirred Layer Thickness CV (%)	10
						Skin surface pH : Female	5	Ileum II Unstirred Layer pH	6.5
						Skin surface pH CV (%) : Female	8.9	Ileum II Unstirred Layer CV (%)	0.5
						Skin temperature °C : Female	32	Ileum II ABCB1 (P-gp/MDR1) (Relative values)	1.51
						Skin temperature CV (%) : Female	0	Ileum II ABCC1 (MRP1) (Relative values)	0.86
						Shape of corneocyte : Male	Cuboid (brick)	Ileum II ABCC2 (MRP2) (Relative values)	0.6
						Shape of corneocyte : Female	Cuboid (brick)	Ileum II ABCC3 (MRP3) (Relative values)	1.54
						Number of SC layers : Female	12	Ileum II ABCC4 (MRP4) (Relative values)	1.71
						Number of SC layers CV (%) : Female	8.4	Ileum II ABCG2 (BCRP) (Relative values)	0.78
						Water density gm/cm3 : Female	1	Ileum II SLC2A2 (GLUT2) (Relative values)	1
						Water density CV (%) : Female	0	Ileum II SLC10A2 (ASBT/IBAT) (Relative values)	98.44
						SC lipids density gm/cm3 : Female	0.9	Ileum II SLC15A1 (PEPT1) (Relative values)	1.23
						SC lipids density CV (%) : Female	0	Ileum II SLC16A1 (MCT1) (Relative values)	1.29
						SC proteins density gm/cm3 : Female	1.37	Ileum II SLCO2B1 (OATP2B1) (Relative values)	1.28
						SC proteins density CV (%) : Female	0	Ileum II SLCO4C1 (OATP4C1) (Relative values)	1
						Intercellular lipid thickness of SC µm : Female	0.091	Ileum II SLC22A1 (OCT1) (Relative values)	1.29
						Intercellular lipid thickness of SC CV (%) : Female	0	Ileum II SLC22A3 (OCT3) (Relative values)	1.08
						Tortuosity : Female	User Defined	Ileum II SLC22A4 (OCTN1) (Relative values)	0.78
						Tortuosity of lipid diffusion pathway of SC : Female	12.7	Ileum II SLC51A/B (OST-α/β) (Relative values)	1.08
						Tortuosity of lipid diffusion pathway of SC CV (%) : Female	18	Ileum II Apical Influx (Intestine) (Relative values)	1
						Hair follicle diameter µm : Female	65.4	Ileum II Apical Efflux (Intestine) (Relative values)	1
						Hair follicle diameter CV (%) : Female	83	Ileum II Basolateral Influx (Intestine) (Relative values)	1
						Hair follicle density N/cm2 : Female	292	Ileum II Basolateral Efflux (Intestine) (Relative values)	1
						Hair follicle density CV (%) : Female	16	Ileum III Blood Flow (Qvilli %)	10.7
						Hair follicle depth µm : Female	204.8	Ileum III Transit Time (% Total)	15.2
						Hair follicle depth CV (%) : Female	0	Ileum III CYP3A (% Total)	7.94
						Hair shaft diameter µm : Female	15.9	Ileum III S9PPI (% Total)	7.83
						Hair shaft diameter CV (%) : Female	57	Ileum III MPPI/CYP (% Total)	7.94
						Sebum viscosity centipose : Female	40	Ileum III CPPI (% Total)	7.83
						Sebum viscosity CV (%) : Female	0	Ileum III pH High Fat Fed	7.1
						Corneocyte pH [top] : Female	6.8	Ileum III CV pH High Fat Fed (%)	7
						Corneocyte pH [top] CV (%) : Female	6.8	Ileum III pH Fed	7.1
						Corneocyte thickness [top] µm : Female	0.71	Ileum III CV pH Fed (%)	7
						Corneocyte thickness [top] CV (%) : Female	36	Ileum III pH Low Fat Fed	7.1
						Corneocyte width [top] µm : Female	27.7	Ileum III CV pH Low Fat Fed (%)	7
						Corneocyte width [top] CV (%) : Female	9.2	Ileum III pH Fasted	7.1
						Corneocyte length [top] µm : Female	34.2	Ileum III CV pH Fasted (%)	7
						Corneocyte length [top] CV (%) : Female	4.1	Ileum III Bicarbonate Buffer Concentration Fasted (mM)	30
						Hydration level (% water volume) [top] : Female	35.5	Ileum III Bicarbonate Buffer Concentration CV Fasted (%)	30
						Hydration level (% water volume) [top] CV (%) : Female	17	Ileum III Bicarbonate Buffer Concentration Fed (mM)	30
						SC lipid viscosity [top] centipose : Female	75	Ileum III Bicarbonate Buffer Concentration CV Fed (%)	30
						SC lipid viscosity [top] CV (%) : Female	0	Ileum III Luminal Fluid Velocity Fasted (m/s)	0.0013
						Corneocyte pH [upper mid] : Female	6.8	Ileum III Luminal Fluid Velocity CV Fasted (%)	56
						Corneocyte pH [upper mid] CV (%) : Female	6.8	Ileum III Luminal Fluid Velocity Fed (m/s)	0.0013
						Corneocyte thickness [upper mid] µm : Female	0.81	Ileum III Luminal Fluid Velocity CV Fed (%)	56
						Corneocyte thickness [upper mid] CV (%) : Female	36	Ileum III Endogenous Ion Hydrochloric Mean (mM)	84
						Corneocyte width [upper mid] µm : Female	27.7	Ileum III Endogenous Ion Hydrochloric CV (%)	15.1
						Corneocyte width [upper mid] CV (%) : Female	9.2	Ileum III Endogenous Ion Hydrochloric Min (mM)	59.6
						Corneocyte length [upper mid] µm : Female	34.2	Ileum III Endogenous Ion Hydrochloric Max (mM)	116.7
						Corneocyte length [upper mid] CV (%) : Female	4.1	Ileum III Endogenous Ion Sodium Mean (mM)	128.9
						Hydration level (% water volume) [upper mid] : Female	46.1	Ileum III Endogenous Ion Sodium CV (%)	9.2
						Hydration level (% water volume) [upper mid] CV (%) : Female	11	Ileum III Endogenous Ion Sodium Min (mM)	101.5
						SC lipid viscosity [upper mid] centipose : Female	75	Ileum III Endogenous Ion Sodium Max (mM)	162.5
						SC lipid viscosity [upper mid] CV (%) : Female	0	Ileum III Endogenous Ion Potassium Mean (mM)	6.3
						Corneocyte pH [lower mid] : Female	6.8	Ileum III Endogenous Ion Potassium CV (%)	38.9
						Corneocyte pH [lower mid] CV (%) : Female	6.8	Ileum III Endogenous Ion Potassium Min (mM)	4.7
						Corneocyte thickness [lower mid] µm : Female	0.91	Ileum III Endogenous Ion Potassium Max (mM)	8.3
						Corneocyte thickness [lower mid] CV (%) : Female	36	Ileum III Endogenous Ion Calcium Mean (mM)	0.5
						Corneocyte width [lower mid] µm : Female	27.7	Ileum III Endogenous Ion Calcium CV (%)	60
						Corneocyte width [lower mid] CV (%) : Female	9.2	Ileum III Endogenous Ion Calcium Min (mM)	0.1
						Corneocyte length [lower mid] µm : Female	34.2	Ileum III Endogenous Ion Calcium Max (mM)	1.3
						Corneocyte length [lower mid] CV (%) : Female	4.1	Ileum III Endogenous Ion Generic Cation Mean (mM)	1
						Hydration level (% water volume) [lower mid] : Female	56.75	Ileum III Endogenous Ion Generic Cation CV (%)	0
						Hydration level (% water volume) [lower mid] CV (%) : Female	7	Ileum III Endogenous Ion Generic Cation Min (mM)	0.01
						SC lipid viscosity [lower mid] centipose : Female	75	Ileum III Endogenous Ion Generic Cation Max (mM)	1000
						SC lipid viscosity [lower mid] CV (%) : Female	0	Ileum III Endogenous Ion Generic Anion Mean (mM)	1
						Corneocyte pH [bottom] : Female	6.8	Ileum III Endogenous Ion Generic Anion CV (%)	0
						Corneocyte pH [bottom] CV (%) : Female	6.8	Ileum III Endogenous Ion Generic Anion Min (mM)	0.01
						Corneocyte thickness [bottom] µm : Female	1.03	Ileum III Endogenous Ion Generic Anion Max (mM)	1000
						Corneocyte thickness [bottom] CV (%) : Female	36	Ileum III Fluid Viscosity Fasted (cP)	3
						Corneocyte width [bottom] µm : Female	27.7	Ileum III Fluid Viscosity CV Fasted (%)	71
						Corneocyte width [bottom] CV (%) : Female	9.2	Ileum III Fluid Viscosity Fed (cP)	3
						Corneocyte length [bottom] µm : Female	34.2	Ileum III Fluid Viscosity CV Fed (%)	71
						Corneocyte length [bottom] CV (%) : Female	4.1	Ileum III CMC fasted (mM)	1
						Hydration level (% water volume) [bottom] : Female	67.4	Ileum III CMC fed (mM)	1
						Hydration level (% water volume) [bottom] CV (%) : Female	4	Ileum III Bile fasted (mM)	1.25
						SC lipid viscosity [bottom] centipose : Female	75	Ileum III Bile fasted CV (%)	30
						SC lipid viscosity [bottom] CV (%) : Female	0	Ileum III Bile fed (mM)	8.06
						Viable Epidermis thickness µm : Female	50.05	Ileum III Bile fed CV (%)	65
						Viable Epidermis thickness CV (%) : Female	7	Ileum III Channel Depth Mean (µm)	289.94
						Dermis thickness µm : Female	1250	Ileum III Channel Depth CV (%)	49.37
						Dermis thickness CV (%) : Female	45	Ileum III Channel Width Mean (µm)	56.19
						Subcutis thickness mm : Female	1.91	Ileum III Channel Width CV (%)	30
						Subcutis thickness CV (%) : Female	55.7	Ileum III Mean Thickness Mean (µm)	127
						Muscle thickness mm : Female	1.37	Ileum III Mean Thickness CV (%)	30
						Muscle thickness CV (%) : Female	4.38	Ileum III Fold Expansion Mean	1.08
						Dermis regional blood flow scalar : Female	2.13	Ileum III Fold Expansion CV (%)	16.07
						Dermis regional blood flow scalar CV (%) : Female	0	Ileum III Pore Radius Mean	8.6
						Subcutis regional blood flow scalar : Female	1	Ileum III Pore Radius CV (%)	0
						Subcutis regional blood flow scalar CV (%) : Female	0	Ileum III Unstirred Layer Thickness Mean (µm)	480
						Muscle regional blood flow scalar : Female	1	Ileum III Unstirred Layer Thickness CV (%)	10
						Muscle regional blood flow scalar CV (%) : Female	0	Ileum III Unstirred Layer pH	6.5
								Ileum III Unstirred Layer CV (%)	0.5
						MPMLA - Forearm Inner (volar)		Ileum III ABCB1 (P-gp/MDR1) (Relative values)	1.52
						Skin surface pH : Female	5.2	Ileum III ABCC1 (MRP1) (Relative values)	0.89
						Skin surface pH CV (%) : Female	8.1	Ileum III ABCC2 (MRP2) (Relative values)	0.6
						Skin temperature °C : Female	32	Ileum III ABCC3 (MRP3) (Relative values)	1.6
						Skin temperature CV (%) : Female	0	Ileum III ABCC4 (MRP4) (Relative values)	1.2
						Shape of corneocyte : Male	Cuboid (brick)	Ileum III ABCG2 (BCRP) (Relative values)	0.78
						Shape of corneocyte : Female	Cuboid (brick)	Ileum III SLC2A2 (GLUT2) (Relative values)	1
						Number of SC layers : Female	22	Ileum III SLC10A2 (ASBT/IBAT) (Relative values)	109.18
						Number of SC layers CV (%) : Female	30.3	Ileum III SLC15A1 (PEPT1) (Relative values)	1.24
						Water density gm/cm3 : Female	1	Ileum III SLC16A1 (MCT1) (Relative values)	1.29
						Water density CV (%) : Female	0	Ileum III SLCO2B1 (OATP2B1) (Relative values)	1.28
						SC lipids density gm/cm3 : Female	0.9	Ileum III SLCO4C1 (OATP4C1) (Relative values)	1
						SC lipids density CV (%) : Female	0	Ileum III SLC22A1 (OCT1) (Relative values)	1.3
						SC proteins density gm/cm3 : Female	1.37	Ileum III SLC22A3 (OCT3) (Relative values)	1.23
						SC proteins density CV (%) : Female	0	Ileum III SLC22A4 (OCTN1) (Relative values)	0.8
						Intercellular lipid thickness of SC µm : Female	0.091	Ileum III SLC51A/B (OST-α/β) (Relative values)	0.93
						Intercellular lipid thickness of SC CV (%) : Female	0	Ileum III Apical Influx (Intestine) (Relative values)	1
						Tortuosity : Female	User Defined	Ileum III Apical Efflux (Intestine) (Relative values)	1
						Tortuosity of lipid diffusion pathway of SC : Female	12.7	Ileum III Basolateral Influx (Intestine) (Relative values)	1
						Tortuosity of lipid diffusion pathway of SC CV (%) : Female	18	Ileum III Basolateral Efflux (Intestine) (Relative values)	1
						Hair follicle diameter µm : Female	77.7	Ileum IV Blood Flow (Qvilli %)	10.7
						Hair follicle diameter CV (%) : Female	32	Ileum IV Transit Time (% Total)	15.2
						Hair follicle density N/cm2 : Female	18	Ileum IV CYP3A (% Total)	7.94
						Hair follicle density CV (%) : Female	39	Ileum IV S9PPI (% Total)	7.83
						Hair follicle depth µm : Female	109.5	Ileum IV MPPI/CYP (% Total)	7.94
						Hair follicle depth CV (%) : Female	0	Ileum IV CPPI (% Total)	7.83
						Hair shaft diameter µm : Female	18	Ileum IV pH High Fat Fed	7.3
						Hair shaft diameter CV (%) : Female	34	Ileum IV CV pH High Fat Fed (%)	6
						Sebum viscosity centipose : Female	40	Ileum IV pH Fed	7.3
						Sebum viscosity CV (%) : Female	0	Ileum IV CV pH Fed (%)	6
						Corneocyte pH [top] : Female	6.8	Ileum IV pH Low Fat Fed	7.3
						Corneocyte pH [top] CV (%) : Female	6.8	Ileum IV CV pH Low Fat Fed (%)	6
						Corneocyte thickness [top] µm : Female	0.59	Ileum IV pH Fasted	7.3
						Corneocyte thickness [top] CV (%) : Female	22	Ileum IV CV pH Fasted (%)	6
						Corneocyte width [top] µm : Female	29.6	Ileum IV Bicarbonate Buffer Concentration Fasted (mM)	30
						Corneocyte width [top] CV (%) : Female	5.9	Ileum IV Bicarbonate Buffer Concentration CV Fasted (%)	30
						Corneocyte length [top] µm : Female	36.4	Ileum IV Bicarbonate Buffer Concentration Fed (mM)	30
						Corneocyte length [top] CV (%) : Female	5.7	Ileum IV Bicarbonate Buffer Concentration CV Fed (%)	30
						Hydration level (% water volume) [top] : Female	33.9	Ileum IV Luminal Fluid Velocity Fasted (m/s)	0.0013
						Hydration level (% water volume) [top] CV (%) : Female	9	Ileum IV Luminal Fluid Velocity CV Fasted (%)	56
						SC lipid viscosity [top] centipose : Female	75	Ileum IV Luminal Fluid Velocity Fed (m/s)	0.0013
						SC lipid viscosity [top] CV (%) : Female	0	Ileum IV Luminal Fluid Velocity CV Fed (%)	56
						Corneocyte pH [upper mid] : Female	6.8	Ileum IV Endogenous Ion Hydrochloric Mean (mM)	67.4
						Corneocyte pH [upper mid] CV (%) : Female	6.8	Ileum IV Endogenous Ion Hydrochloric CV (%)	15.1
						Corneocyte thickness [upper mid] µm : Female	0.67	Ileum IV Endogenous Ion Hydrochloric Min (mM)	58
						Corneocyte thickness [upper mid] CV (%) : Female	22	Ileum IV Endogenous Ion Hydrochloric Max (mM)	79
						Corneocyte width [upper mid] µm : Female	29.6	Ileum IV Endogenous Ion Sodium Mean (mM)	127.2
						Corneocyte width [upper mid] CV (%) : Female	5.9	Ileum IV Endogenous Ion Sodium CV (%)	9.2
						Corneocyte length [upper mid] µm : Female	36.4	Ileum IV Endogenous Ion Sodium Min (mM)	112
						Corneocyte length [upper mid] CV (%) : Female	5.7	Ileum IV Endogenous Ion Sodium Max (mM)	138
						Hydration level (% water volume) [upper mid] : Female	44.6987	Ileum IV Endogenous Ion Potassium Mean (mM)	5.9
						Hydration level (% water volume) [upper mid] CV (%) : Female	6	Ileum IV Endogenous Ion Potassium CV (%)	38.9
						SC lipid viscosity [upper mid] centipose : Female	75	Ileum IV Endogenous Ion Potassium Min (mM)	5.3
						SC lipid viscosity [upper mid] CV (%) : Female	0	Ileum IV Endogenous Ion Potassium Max (mM)	6.5
						Corneocyte pH [lower mid] : Female	6.8	Ileum IV Endogenous Ion Calcium Mean (mM)	0.5
						Corneocyte pH [lower mid] CV (%) : Female	6.8	Ileum IV Endogenous Ion Calcium CV (%)	60
						Corneocyte thickness [lower mid] µm : Female	0.76	Ileum IV Endogenous Ion Calcium Min (mM)	0.1
						Corneocyte thickness [lower mid] CV (%) : Female	22	Ileum IV Endogenous Ion Calcium Max (mM)	1.3
						Corneocyte width [lower mid] µm : Female	29.6	Ileum IV Endogenous Ion Generic Cation Mean (mM)	1
						Corneocyte width [lower mid] CV (%) : Female	5.9	Ileum IV Endogenous Ion Generic Cation CV (%)	0
						Corneocyte length [lower mid] µm : Female	36.4	Ileum IV Endogenous Ion Generic Cation Min (mM)	0.01
						Corneocyte length [lower mid] CV (%) : Female	5.7	Ileum IV Endogenous Ion Generic Cation Max (mM)	1000
						Hydration level (% water volume) [lower mid] : Female	55.5388	Ileum IV Endogenous Ion Generic Anion Mean (mM)	1
						Hydration level (% water volume) [lower mid] CV (%) : Female	5	Ileum IV Endogenous Ion Generic Anion CV (%)	0
						SC lipid viscosity [lower mid] centipose : Female	75	Ileum IV Endogenous Ion Generic Anion Min (mM)	0.01
						SC lipid viscosity [lower mid] CV (%) : Female	0	Ileum IV Endogenous Ion Generic Anion Max (mM)	1000
						Corneocyte pH [bottom] : Female	6.8	Ileum IV Fluid Viscosity Fasted (cP)	3
						Corneocyte pH [bottom] CV (%) : Female	6.8	Ileum IV Fluid Viscosity CV Fasted (%)	71
						Corneocyte thickness [bottom] µm : Female	0.86	Ileum IV Fluid Viscosity Fed (cP)	3
						Corneocyte thickness [bottom] CV (%) : Female	22	Ileum IV Fluid Viscosity CV Fed (%)	71
						Corneocyte width [bottom] µm : Female	29.6	Ileum IV CMC fasted (mM)	1
						Corneocyte width [bottom] CV (%) : Female	5.9	Ileum IV CMC fed (mM)	1
						Corneocyte length [bottom] µm : Female	36.4	Ileum IV Bile fasted (mM)	1.25
						Corneocyte length [bottom] CV (%) : Female	5.7	Ileum IV Bile fasted CV (%)	30
						Hydration level (% water volume) [bottom] : Female	66.4	Ileum IV Bile fed (mM)	5.96
						Hydration level (% water volume) [bottom] CV (%) : Female	4	Ileum IV Bile fed CV (%)	65
						SC lipid viscosity [bottom] centipose : Female	75	Ileum IV Channel Depth Mean (µm)	289.94
						SC lipid viscosity [bottom] CV (%) : Female	0	Ileum IV Channel Depth CV (%)	49.37
						Viable Epidermis thickness µm : Female	41.9655	Ileum IV Channel Width Mean (µm)	56.19
						Viable Epidermis thickness CV (%) : Female	19	Ileum IV Channel Width CV (%)	30
						Dermis thickness µm : Female	1240	Ileum IV Mean Thickness Mean (µm)	127
						Dermis thickness CV (%) : Female	20	Ileum IV Mean Thickness CV (%)	30
						Subcutis thickness mm : Female	1.91	Ileum IV Fold Expansion Mean	1.04
						Subcutis thickness CV (%) : Female	55.7	Ileum IV Fold Expansion CV (%)	12.4
						Muscle thickness mm : Female	23.81	Ileum IV Pore Radius Mean	8.6
						Muscle thickness CV (%) : Female	14.85	Ileum IV Pore Radius CV (%)	0
						Dermis regional blood flow scalar : Female	0.909226	Ileum IV Unstirred Layer Thickness Mean (µm)	480
						Dermis regional blood flow scalar CV (%) : Female	0	Ileum IV Unstirred Layer Thickness CV (%)	10
						Subcutis regional blood flow scalar : Female	1	Ileum IV Unstirred Layer pH	6.5
						Subcutis regional blood flow scalar CV (%) : Female	0	Ileum IV Unstirred Layer CV (%)	0.5
						Muscle regional blood flow scalar : Female	1	Ileum IV ABCB1 (P-gp/MDR1) (Relative values)	1.51
						Muscle regional blood flow scalar CV (%) : Female	0	Ileum IV ABCC1 (MRP1) (Relative values)	0.89
								Ileum IV ABCC2 (MRP2) (Relative values)	0.6
						MPMLA - Forearm Outer (dorsal)		Ileum IV ABCC3 (MRP3) (Relative values)	1.6
						Skin surface pH : Female	5.2	Ileum IV ABCC4 (MRP4) (Relative values)	1.2
						Skin surface pH CV (%) : Female	8.1	Ileum IV ABCG2 (BCRP) (Relative values)	0.78
						Skin temperature °C : Female	32	Ileum IV SLC2A2 (GLUT2) (Relative values)	1
						Skin temperature CV (%) : Female	0	Ileum IV SLC10A2 (ASBT/IBAT) (Relative values)	108
						Shape of corneocyte : Male	Cuboid (brick)	Ileum IV SLC15A1 (PEPT1) (Relative values)	1.24
						Shape of corneocyte : Female	Cuboid (brick)	Ileum IV SLC16A1 (MCT1) (Relative values)	1.29
						Number of SC layers : Female	22	Ileum IV SLCO2B1 (OATP2B1) (Relative values)	1.28
						Number of SC layers CV (%) : Female	30.3	Ileum IV SLCO4C1 (OATP4C1) (Relative values)	1
						Water density gm/cm3 : Female	1	Ileum IV SLC22A1 (OCT1) (Relative values)	1.3
						Water density CV (%) : Female	0	Ileum IV SLC22A3 (OCT3) (Relative values)	1.23
						SC lipids density gm/cm3 : Female	0.9	Ileum IV SLC22A4 (OCTN1) (Relative values)	0.8
						SC lipids density CV (%) : Female	0	Ileum IV SLC51A/B (OST-α/β) (Relative values)	0.93
						SC proteins density gm/cm3 : Female	1.37	Ileum IV Apical Influx (Intestine) (Relative values)	1
						SC proteins density CV (%) : Female	0	Ileum IV Apical Efflux (Intestine) (Relative values)	1
						Intercellular lipid thickness of SC µm : Female	0.091	Ileum IV Basolateral Influx (Intestine) (Relative values)	1
						Intercellular lipid thickness of SC CV (%) : Female	0	Ileum IV Basolateral Efflux (Intestine) (Relative values)	1
						Tortuosity : Female	User Defined	Colon pH High Fat Fed	6.33
						Tortuosity of lipid diffusion pathway of SC : Female	12.7	Colon CV pH High Fat Fed (%)	11.78
						Tortuosity of lipid diffusion pathway of SC CV (%) : Female	18	Colon pH Fed	6.33
						Hair follicle diameter µm : Female	77.7	Colon CV pH Fed (%)	12
						Hair follicle diameter CV (%) : Female	32	Colon pH Low Fat Fed	6.33
						Hair follicle density N/cm2 : Female	18	Colon CV pH Low Fat Fed (%)	11.78
						Hair follicle density CV (%) : Female	39	Colon pH Fasted	6.6
						Hair follicle depth µm : Female	109.5	Colon CV pH Fasted (%)	13
						Hair follicle depth CV (%) : Female	0	Colon Bicarbonate Buffer Concentration Fasted (mM)	90.87
						Hair shaft diameter µm : Female	18	Colon Bicarbonate Buffer Concentration CV Fasted (%)	30
						Hair shaft diameter CV (%) : Female	34	Colon Bicarbonate Buffer Concentration Fed (mM)	44.43
						Sebum viscosity centipose : Female	40	Colon Bicarbonate Buffer Concentration CV Fed (%)	30
						Sebum viscosity CV (%) : Female	0	Colon Luminal Fluid Velocity Fasted (m/s)	0.0013
						Corneocyte pH [top] : Female	6.8	Colon Luminal Fluid Velocity CV Fasted (%)	56
						Corneocyte pH [top] CV (%) : Female	6.8	Colon Luminal Fluid Velocity Fed (m/s)	0.0013
						Corneocyte thickness [top] µm : Female	0.69	Colon Luminal Fluid Velocity CV Fed (%)	56
						Corneocyte thickness [top] CV (%) : Female	22	Colon Endogenous Ion Hydrochloric Mean (mM)	14
						Corneocyte width [top] µm : Female	29.6	Colon Endogenous Ion Hydrochloric CV (%)	13
						Corneocyte width [top] CV (%) : Female	5.9	Colon Endogenous Ion Hydrochloric Min (mM)	7
						Corneocyte length [top] µm : Female	36.4	Colon Endogenous Ion Hydrochloric Max (mM)	20
						Corneocyte length [top] CV (%) : Female	5.7	Colon Endogenous Ion Sodium Mean (mM)	30
						Hydration level (% water volume) [top] : Female	33.9	Colon Endogenous Ion Sodium CV (%)	42
						Hydration level (% water volume) [top] CV (%) : Female	9	Colon Endogenous Ion Sodium Min (mM)	6
						SC lipid viscosity [top] centipose : Female	75	Colon Endogenous Ion Sodium Max (mM)	93
						SC lipid viscosity [top] CV (%) : Female	0	Colon Endogenous Ion Potassium Mean (mM)	77
						Corneocyte pH [upper mid] : Female	6.8	Colon Endogenous Ion Potassium CV (%)	11
						Corneocyte pH [upper mid] CV (%) : Female	6.8	Colon Endogenous Ion Potassium Min (mM)	40
						Corneocyte thickness [upper mid] µm : Female	0.79	Colon Endogenous Ion Potassium Max (mM)	108
						Corneocyte thickness [upper mid] CV (%) : Female	22	Colon Endogenous Ion Calcium Mean (mM)	20
						Corneocyte width [upper mid] µm : Female	29.6	Colon Endogenous Ion Calcium CV (%)	34
						Corneocyte width [upper mid] CV (%) : Female	5.9	Colon Endogenous Ion Calcium Min (mM)	7
						Corneocyte length [upper mid] µm : Female	36.4	Colon Endogenous Ion Calcium Max (mM)	85
						Corneocyte length [upper mid] CV (%) : Female	5.7	Colon Endogenous Ion Generic Cation Mean (mM)	1
						Hydration level (% water volume) [upper mid] : Female	44.6987	Colon Endogenous Ion Generic Cation CV (%)	0
						Hydration level (% water volume) [upper mid] CV (%) : Female	6	Colon Endogenous Ion Generic Cation Min (mM)	0.01
						SC lipid viscosity [upper mid] centipose : Female	75	Colon Endogenous Ion Generic Cation Max (mM)	1000
						SC lipid viscosity [upper mid] CV (%) : Female	0	Colon Endogenous Ion Generic Anion Mean (mM)	1
						Corneocyte pH [lower mid] : Female	6.8	Colon Endogenous Ion Generic Anion CV (%)	0
						Corneocyte pH [lower mid] CV (%) : Female	6.8	Colon Endogenous Ion Generic Anion Min (mM)	0.01
						Corneocyte thickness [lower mid] µm : Female	0.89	Colon Endogenous Ion Generic Anion Max (mM)	1000
						Corneocyte thickness [lower mid] CV (%) : Female	22	Colon Fluid Viscosity Fasted (cP)	3
						Corneocyte width [lower mid] µm : Female	29.6	Colon Fluid Viscosity CV Fasted (%)	71
						Corneocyte width [lower mid] CV (%) : Female	5.9	Colon Fluid Viscosity Fed (cP)	3
						Corneocyte length [lower mid] µm : Female	36.4	Colon Fluid Viscosity CV Fed (%)	71
						Corneocyte length [lower mid] CV (%) : Female	5.7	Colon CMC fasted (mM)	1
						Hydration level (% water volume) [lower mid] : Female	55.5388	Colon CMC fed (mM)	1
						Hydration level (% water volume) [lower mid] CV (%) : Female	5	Colon Bile fasted (mM)	0.12
						SC lipid viscosity [lower mid] centipose : Female	75	Colon Bile fasted CV (%)	104
						SC lipid viscosity [lower mid] CV (%) : Female	0	Colon Bile fed (mM)	0.59
						Corneocyte pH [bottom] : Female	6.8	Colon Bile fed CV (%)	70
						Corneocyte pH [bottom] CV (%) : Female	6.8	Colon Fold Expansion Mean	1
						Corneocyte thickness [bottom] µm : Female	1	Colon Fold Expansion CV (%)	0
						Corneocyte thickness [bottom] CV (%) : Female	22	Colon Pore Radius Mean	8.6
						Corneocyte width [bottom] µm : Female	29.6	Colon Pore Radius CV (%)	0
						Corneocyte width [bottom] CV (%) : Female	5.9	Colon Unstirred Layer Thickness Mean (µm)	830
						Corneocyte length [bottom] µm : Female	36.4	Colon Unstirred Layer Thickness CV (%)	13
						Corneocyte length [bottom] CV (%) : Female	5.7	Colon Unstirred Layer pH	6.5
						Hydration level (% water volume) [bottom] : Female	66.4	Colon Unstirred Layer CV (%)	0.5
						Hydration level (% water volume) [bottom] CV (%) : Female	4	Colon ABCB1 (P-gp/MDR1) (Relative values)	0.57
						SC lipid viscosity [bottom] centipose : Female	75	Colon ABCC1 (MRP1) (Relative values)	0.93
						SC lipid viscosity [bottom] CV (%) : Female	0	Colon ABCC2 (MRP2) (Relative values)	0.02
						Viable Epidermis thickness µm : Female	53.5684	Colon ABCC3 (MRP3) (Relative values)	5.95
						Viable Epidermis thickness CV (%) : Female	21	Colon ABCC4 (MRP4) (Relative values)	1.76
						Dermis thickness µm : Female	1240	Colon ABCG2 (BCRP) (Relative values)	0.57
						Dermis thickness CV (%) : Female	20	Colon SLC2A2 (GLUT2) (Relative values)	1
						Subcutis thickness mm : Female	1.91	Colon SLC10A2 (ASBT/IBAT) (Relative values)	1.1
						Subcutis thickness CV (%) : Female	55.7	Colon SLC15A1 (PEPT1) (Relative values)	0.03
						Muscle thickness mm : Female	23.81	Colon SLC16A1 (MCT1) (Relative values)	4.72
						Muscle thickness CV (%) : Female	14.85	Colon SLCO2B1 (OATP2B1) (Relative values)	1.06
						Dermis regional blood flow scalar : Female	0.5875	Colon SLCO4C1 (OATP4C1) (Relative values)	1
						Dermis regional blood flow scalar CV (%) : Female	0	Colon SLC22A1 (OCT1) (Relative values)	2.77
						Subcutis regional blood flow scalar : Female	1	Colon SLC22A3 (OCT3) (Relative values)	1.88
						Subcutis regional blood flow scalar CV (%) : Female	0	Colon SLC22A4 (OCTN1) (Relative values)	0.24
						Muscle regional blood flow scalar : Female	1	Colon SLC51A/B (OST-α/β) (Relative values)	0.71
						Muscle regional blood flow scalar CV (%) : Female	0	Colon Apical Influx (Intestine) (Relative values)	1
								Colon Apical Efflux (Intestine) (Relative values)	1
						MPMLA - Upper Arm		Colon Basolateral Influx (Intestine) (Relative values)	1
						Skin surface pH : Female	5.5	Colon Basolateral Efflux (Intestine) (Relative values)	1
						Skin surface pH CV (%) : Female	11.1	Luminal Fluid Density (mg/mL)	993.32
						Skin temperature °C : Female	32	Abundance : ABCB1 (P-gp/MDR1) ET Mean	1
						Skin temperature CV (%) : Female	0	Abundance : ABCB1 (P-gp/MDR1) ET CV (%)	65
						Shape of corneocyte : Male	Cuboid (brick)	Abundance : ABCB1 (P-gp/MDR1) PT Mean	0
						Shape of corneocyte : Female	Cuboid (brick)	Abundance : ABCB1 (P-gp/MDR1) PT CV (%)	0
						Number of SC layers : Female	18	Abundance : ABCB1 (P-gp/MDR1) IT Mean	0
						Number of SC layers CV (%) : Female	21.6	Abundance : ABCB1 (P-gp/MDR1) IT CV (%)	0
						Water density gm/cm3 : Female	1	Abundance : ABCB1 (P-gp/MDR1) UT Mean	0
						Water density CV (%) : Female	0	Abundance : ABCB1 (P-gp/MDR1) UT CV (%)	0
						SC lipids density gm/cm3 : Female	0.9	Abundance : ABCC1 (MRP1) ET Mean	1
						SC lipids density CV (%) : Female	0	Abundance : ABCC1 (MRP1) ET CV (%)	88
						SC proteins density gm/cm3 : Female	1.37	Abundance : ABCC1 (MRP1) PT Mean	0
						SC proteins density CV (%) : Female	0	Abundance : ABCC1 (MRP1) PT CV (%)	0
						Intercellular lipid thickness of SC µm : Female	0.091	Abundance : ABCC1 (MRP1) IT Mean	0
						Intercellular lipid thickness of SC CV (%) : Female	0	Abundance : ABCC1 (MRP1) IT CV (%)	0
						Tortuosity : Female	User Defined	Abundance : ABCC1 (MRP1) UT Mean	0
						Tortuosity of lipid diffusion pathway of SC : Female	12.7	Abundance : ABCC1 (MRP1) UT CV (%)	0
						Tortuosity of lipid diffusion pathway of SC CV (%) : Female	18	Abundance : ABCC2 (MRP2) ET Mean	1
						Hair follicle diameter µm : Female	88.8	Abundance : ABCC2 (MRP2) ET CV (%)	79
						Hair follicle diameter CV (%) : Female	33	Abundance : ABCC2 (MRP2) PT Mean	0
						Hair follicle density N/cm2 : Female	32	Abundance : ABCC2 (MRP2) PT CV (%)	0
						Hair follicle density CV (%) : Female	28	Abundance : ABCC2 (MRP2) IT Mean	0
						Hair follicle depth µm : Female	256.7	Abundance : ABCC2 (MRP2) IT CV (%)	0
						Hair follicle depth CV (%) : Female	0	Abundance : ABCC2 (MRP2) UT Mean	0
						Hair shaft diameter µm : Female	16.8	Abundance : ABCC2 (MRP2) UT CV (%)	0
						Hair shaft diameter CV (%) : Female	37	Abundance : ABCC3 (MRP3) ET Mean	1
						Sebum viscosity centipose : Female	40	Abundance : ABCC3 (MRP3) ET CV (%)	64
						Sebum viscosity CV (%) : Female	0	Abundance : ABCC3 (MRP3) PT Mean	0
						Corneocyte pH [top] : Female	6.8	Abundance : ABCC3 (MRP3) PT CV (%)	0
						Corneocyte pH [top] CV (%) : Female	6.8	Abundance : ABCC3 (MRP3) IT Mean	0
						Corneocyte thickness [top] µm : Female	0.71	Abundance : ABCC3 (MRP3) IT CV (%)	0
						Corneocyte thickness [top] CV (%) : Female	11	Abundance : ABCC3 (MRP3) UT Mean	0
						Corneocyte width [top] µm : Female	33.2	Abundance : ABCC3 (MRP3) UT CV (%)	0
						Corneocyte width [top] CV (%) : Female	10.4	Abundance : ABCC4 (MRP4) ET Mean	1
						Corneocyte length [top] µm : Female	40.4	Abundance : ABCC4 (MRP4) ET CV (%)	106
						Corneocyte length [top] CV (%) : Female	6.8	Abundance : ABCC4 (MRP4) PT Mean	0
						Hydration level (% water volume) [top] : Female	33.6	Abundance : ABCC4 (MRP4) PT CV (%)	0
						Hydration level (% water volume) [top] CV (%) : Female	11	Abundance : ABCC4 (MRP4) IT Mean	0
						SC lipid viscosity [top] centipose : Female	75	Abundance : ABCC4 (MRP4) IT CV (%)	0
						SC lipid viscosity [top] CV (%) : Female	0	Abundance : ABCC4 (MRP4) UT Mean	0
						Corneocyte pH [upper mid] : Female	6.8	Abundance : ABCC4 (MRP4) UT CV (%)	0
						Corneocyte pH [upper mid] CV (%) : Female	6.8	Abundance : ABCG2 (BCRP) ET Mean	1
						Corneocyte thickness [upper mid] µm : Female	0.81	Abundance : ABCG2 (BCRP) ET CV (%)	63
						Corneocyte thickness [upper mid] CV (%) : Female	11	Abundance : ABCG2 (BCRP) PT Mean	0.37
						Corneocyte width [upper mid] µm : Female	33.2	Abundance : ABCG2 (BCRP) PT CV (%)	63
						Corneocyte width [upper mid] CV (%) : Female	10.4	Abundance : ABCG2 (BCRP) IT Mean	0.67
						Corneocyte length [upper mid] µm : Female	40.4	Abundance : ABCG2 (BCRP) IT CV (%)	63
						Corneocyte length [upper mid] CV (%) : Female	6.8	Abundance : ABCG2 (BCRP) UT Mean	0
						Hydration level (% water volume) [upper mid] : Female	44.858	Abundance : ABCG2 (BCRP) UT CV (%)	0
						Hydration level (% water volume) [upper mid] CV (%) : Female	7	Abundance : SLC2A2 (GLUT2) ET Mean	1
						SC lipid viscosity [upper mid] centipose : Female	75	Abundance : SLC2A2 (GLUT2) ET CV (%)	31
						SC lipid viscosity [upper mid] CV (%) : Female	0	Abundance : SLC2A2 (GLUT2) PT Mean	0
						Corneocyte pH [lower mid] : Female	6.8	Abundance : SLC2A2 (GLUT2) PT CV (%)	0
						Corneocyte pH [lower mid] CV (%) : Female	6.8	Abundance : SLC2A2 (GLUT2) IT Mean	0
						Corneocyte thickness [lower mid] µm : Female	0.93	Abundance : SLC2A2 (GLUT2) IT CV (%)	0
						Corneocyte thickness [lower mid] CV (%) : Female	11	Abundance : SLC2A2 (GLUT2) UT Mean	0
						Corneocyte width [lower mid] µm : Female	33.2	Abundance : SLC2A2 (GLUT2) UT CV (%)	0
						Corneocyte width [lower mid] CV (%) : Female	10.4	Abundance : SLC10A2 (ASBT/IBAT) ET Mean	1
						Corneocyte length [lower mid] µm : Female	40.4	Abundance : SLC10A2 (ASBT/IBAT) ET CV (%)	43
						Corneocyte length [lower mid] CV (%) : Female	6.8	Abundance : SLC10A2 (ASBT/IBAT) PT Mean	0
						Hydration level (% water volume) [lower mid] : Female	56.0703	Abundance : SLC10A2 (ASBT/IBAT) PT CV (%)	0
						Hydration level (% water volume) [lower mid] CV (%) : Female	5	Abundance : SLC10A2 (ASBT/IBAT) IT Mean	0
						SC lipid viscosity [lower mid] centipose : Female	75	Abundance : SLC10A2 (ASBT/IBAT) IT CV (%)	0
						SC lipid viscosity [lower mid] CV (%) : Female	0	Abundance : SLC10A2 (ASBT/IBAT) UT Mean	0
						Corneocyte pH [bottom] : Female	6.8	Abundance : SLC10A2 (ASBT/IBAT) UT CV (%)	0
						Corneocyte pH [bottom] CV (%) : Female	6.8	Abundance : SLC15A1 (PEPT1) ET Mean	1
						Corneocyte thickness [bottom] µm : Female	1.04	Abundance : SLC15A1 (PEPT1) ET CV (%)	41
						Corneocyte thickness [bottom] CV (%) : Female	11	Abundance : SLC15A1 (PEPT1) PT Mean	0
						Corneocyte width [bottom] µm : Female	33.2	Abundance : SLC15A1 (PEPT1) PT CV (%)	0
						Corneocyte width [bottom] CV (%) : Female	10.4	Abundance : SLC15A1 (PEPT1) IT Mean	0
						Corneocyte length [bottom] µm : Female	40.4	Abundance : SLC15A1 (PEPT1) IT CV (%)	0
						Corneocyte length [bottom] CV (%) : Female	6.8	Abundance : SLC15A1 (PEPT1) UT Mean	0
						Hydration level (% water volume) [bottom] : Female	67.3	Abundance : SLC15A1 (PEPT1) UT CV (%)	0
						Hydration level (% water volume) [bottom] CV (%) : Female	4	Abundance : SLC16A1 (MCT1) ET Mean	1
						SC lipid viscosity [bottom] centipose : Female	75	Abundance : SLC16A1 (MCT1) ET CV (%)	75
						SC lipid viscosity [bottom] CV (%) : Female	0	Abundance : SLC16A1 (MCT1) PT Mean	0
						Viable Epidermis thickness µm : Female	51.8	Abundance : SLC16A1 (MCT1) PT CV (%)	0
						Viable Epidermis thickness CV (%) : Female	15	Abundance : SLC16A1 (MCT1) IT Mean	0
						Dermis thickness µm : Female	1540	Abundance : SLC16A1 (MCT1) IT CV (%)	0
						Dermis thickness CV (%) : Female	29	Abundance : SLC16A1 (MCT1) UT Mean	0
						Subcutis thickness mm : Female	9.64	Abundance : SLC16A1 (MCT1) UT CV (%)	0
						Subcutis thickness CV (%) : Female	56.2	Abundance : SLCO2B1 (OATP2B1) ET Mean	1
						Muscle thickness mm : Female	22.79	Abundance : SLCO2B1 (OATP2B1) ET CV (%)	74
						Muscle thickness CV (%) : Female	28.92	Abundance : SLCO2B1 (OATP2B1) PT Mean	0
						Dermis regional blood flow scalar : Female	1.2869	Abundance : SLCO2B1 (OATP2B1) PT CV (%)	0
						Dermis regional blood flow scalar CV (%) : Female	0	Abundance : SLCO2B1 (OATP2B1) IT Mean	0
						Subcutis regional blood flow scalar : Female	1	Abundance : SLCO2B1 (OATP2B1) IT CV (%)	0
						Subcutis regional blood flow scalar CV (%) : Female	0	Abundance : SLCO2B1 (OATP2B1) UT Mean	0
						Muscle regional blood flow scalar : Female	1	Abundance : SLCO2B1 (OATP2B1) UT CV (%)	0
						Muscle regional blood flow scalar CV (%) : Female	0	Abundance : SLCO4C1 (OATP4C1) ET Mean	1
								Abundance : SLCO4C1 (OATP4C1) ET CV (%)	60
						MPMLA - Face (cheek)		Abundance : SLCO4C1 (OATP4C1) PT Mean	0
						Skin surface pH : Female	5.3	Abundance : SLCO4C1 (OATP4C1) PT CV (%)	0
						Skin surface pH CV (%) : Female	7.4	Abundance : SLCO4C1 (OATP4C1) IT Mean	0
						Skin temperature °C : Female	32	Abundance : SLCO4C1 (OATP4C1) IT CV (%)	0
						Skin temperature CV (%) : Female	0	Abundance : SLCO4C1 (OATP4C1) UT Mean	0
						Shape of corneocyte : Male	Cuboid (brick)	Abundance : SLCO4C1 (OATP4C1) UT CV (%)	0
						Shape of corneocyte : Female	Cuboid (brick)	Abundance : SLC22A1 (OCT1) ET Mean	1
						Number of SC layers : Female	13	Abundance : SLC22A1 (OCT1) ET CV (%)	49
						Number of SC layers CV (%) : Female	22.6	Abundance : SLC22A1 (OCT1) PT Mean	0.01
						Water density gm/cm3 : Female	1	Abundance : SLC22A1 (OCT1) PT CV (%)	49
						Water density CV (%) : Female	0	Abundance : SLC22A1 (OCT1) IT Mean	0.62
						SC lipids density gm/cm3 : Female	0.9	Abundance : SLC22A1 (OCT1) IT CV (%)	49
						SC lipids density CV (%) : Female	0	Abundance : SLC22A1 (OCT1) UT Mean	1.14
						SC proteins density gm/cm3 : Female	1.37	Abundance : SLC22A1 (OCT1) UT CV (%)	49
						SC proteins density CV (%) : Female	0	Abundance : SLC22A3 (OCT3) ET Mean	1
						Intercellular lipid thickness of SC µm : Female	0.091	Abundance : SLC22A3 (OCT3) ET CV (%)	74
						Intercellular lipid thickness of SC CV (%) : Female	0	Abundance : SLC22A3 (OCT3) PT Mean	0
						Tortuosity : Female	User Defined	Abundance : SLC22A3 (OCT3) PT CV (%)	0
						Tortuosity of lipid diffusion pathway of SC : Female	12.7	Abundance : SLC22A3 (OCT3) IT Mean	0
						Tortuosity of lipid diffusion pathway of SC CV (%) : Female	18	Abundance : SLC22A3 (OCT3) IT CV (%)	0
						Hair follicle diameter µm : Female	65.4	Abundance : SLC22A3 (OCT3) UT Mean	0
						Hair follicle diameter CV (%) : Female	83	Abundance : SLC22A3 (OCT3) UT CV (%)	0
						Hair follicle density N/cm2 : Female	292	Abundance : SLC22A4 (OCTN1) ET Mean	1
						Hair follicle density CV (%) : Female	16	Abundance : SLC22A4 (OCTN1) ET CV (%)	106
						Hair follicle depth µm : Female	204.8	Abundance : SLC22A4 (OCTN1) PT Mean	0
						Hair follicle depth CV (%) : Female	0	Abundance : SLC22A4 (OCTN1) PT CV (%)	0
						Hair shaft diameter µm : Female	15.9	Abundance : SLC22A4 (OCTN1) IT Mean	0
						Hair shaft diameter CV (%) : Female	57	Abundance : SLC22A4 (OCTN1) IT CV (%)	0
						Sebum viscosity centipose : Female	40	Abundance : SLC22A4 (OCTN1) UT Mean	0
						Sebum viscosity CV (%) : Female	0	Abundance : SLC22A4 (OCTN1) UT CV (%)	0
						Corneocyte pH [top] : Female	6.8	Abundance : SLC51A/B (OST-α/β) ET Mean	1
						Corneocyte pH [top] CV (%) : Female	6.8	Abundance : SLC51A/B (OST-α/β) ET CV (%)	99
						Corneocyte thickness [top] µm : Female	0.47	Abundance : SLC51A/B (OST-α/β) PT Mean	0
						Corneocyte thickness [top] CV (%) : Female	4	Abundance : SLC51A/B (OST-α/β) PT CV (%)	0
						Corneocyte width [top] µm : Female	27.7	Abundance : SLC51A/B (OST-α/β) IT Mean	0
						Corneocyte width [top] CV (%) : Female	9.2	Abundance : SLC51A/B (OST-α/β) IT CV (%)	0
						Corneocyte length [top] µm : Female	34.2	Abundance : SLC51A/B (OST-α/β) UT Mean	0
						Corneocyte length [top] CV (%) : Female	4.1	Abundance : SLC51A/B (OST-α/β) UT CV (%)	0
						Hydration level (% water volume) [top] : Female	35.5	Abundance : Apical Influx (Intestine) ET Mean	1
						Hydration level (% water volume) [top] CV (%) : Female	17	Abundance : Apical Influx (Intestine) ET CV (%)	0
						SC lipid viscosity [top] centipose : Female	75	Abundance : Apical Influx (Intestine) PT Mean	0
						SC lipid viscosity [top] CV (%) : Female	0	Abundance : Apical Influx (Intestine) PT CV (%)	0
						Corneocyte pH [upper mid] : Female	6.8	Abundance : Apical Influx (Intestine) IT Mean	0
						Corneocyte pH [upper mid] CV (%) : Female	6.8	Abundance : Apical Influx (Intestine) IT CV (%)	0
						Corneocyte thickness [upper mid] µm : Female	0.53	Abundance : Apical Influx (Intestine) UT Mean	0
						Corneocyte thickness [upper mid] CV (%) : Female	4	Abundance : Apical Influx (Intestine) UT CV (%)	0
						Corneocyte width [upper mid] µm : Female	27.7	Abundance : Apical Efflux (Intestine) ET Mean	1
						Corneocyte width [upper mid] CV (%) : Female	9.2	Abundance : Apical Efflux (Intestine) ET CV (%)	0
						Corneocyte length [upper mid] µm : Female	34.2	Abundance : Apical Efflux (Intestine) PT Mean	0
						Corneocyte length [upper mid] CV (%) : Female	4.1	Abundance : Apical Efflux (Intestine) PT CV (%)	0
						Hydration level (% water volume) [upper mid] : Female	46.1	Abundance : Apical Efflux (Intestine) IT Mean	0
						Hydration level (% water volume) [upper mid] CV (%) : Female	11	Abundance : Apical Efflux (Intestine) IT CV (%)	0
						SC lipid viscosity [upper mid] centipose : Female	75	Abundance : Apical Efflux (Intestine) UT Mean	0
						SC lipid viscosity [upper mid] CV (%) : Female	0	Abundance : Apical Efflux (Intestine) UT CV (%)	0
						Corneocyte pH [lower mid] : Female	6.8	Abundance : Basolateral Influx (Intestine) ET Mean	1
						Corneocyte pH [lower mid] CV (%) : Female	6.8	Abundance : Basolateral Influx (Intestine) ET CV (%)	0
						Corneocyte thickness [lower mid] µm : Female	0.6	Abundance : Basolateral Influx (Intestine) PT Mean	0
						Corneocyte thickness [lower mid] CV (%) : Female	4	Abundance : Basolateral Influx (Intestine) PT CV (%)	0
						Corneocyte width [lower mid] µm : Female	27.7	Abundance : Basolateral Influx (Intestine) IT Mean	0
						Corneocyte width [lower mid] CV (%) : Female	9.2	Abundance : Basolateral Influx (Intestine) IT CV (%)	0
						Corneocyte length [lower mid] µm : Female	34.2	Abundance : Basolateral Influx (Intestine) UT Mean	0
						Corneocyte length [lower mid] CV (%) : Female	4.1	Abundance : Basolateral Influx (Intestine) UT CV (%)	0
						Hydration level (% water volume) [lower mid] : Female	56.75	Abundance : Basolateral Efflux (Intestine) ET Mean	1
						Hydration level (% water volume) [lower mid] CV (%) : Female	7	Abundance : Basolateral Efflux (Intestine) ET CV (%)	0
						SC lipid viscosity [lower mid] centipose : Female	75	Abundance : Basolateral Efflux (Intestine) PT Mean	0
						SC lipid viscosity [lower mid] CV (%) : Female	0	Abundance : Basolateral Efflux (Intestine) PT CV (%)	0
						Corneocyte pH [bottom] : Female	6.8	Abundance : Basolateral Efflux (Intestine) IT Mean	0
						Corneocyte pH [bottom] CV (%) : Female	6.8	Abundance : Basolateral Efflux (Intestine) IT CV (%)	0
						Corneocyte thickness [bottom] µm : Female	0.68	Abundance : Basolateral Efflux (Intestine) UT Mean	0
						Corneocyte thickness [bottom] CV (%) : Female	4	Abundance : Basolateral Efflux (Intestine) UT CV (%)	0
						Corneocyte width [bottom] µm : Female	27.7	Fasted Mean gastric emptying time (h)	0.4
						Corneocyte width [bottom] CV (%) : Female	9.2	Fasted CV gastric emptying time (%)	38
						Corneocyte length [bottom] µm : Female	34.2	Fed Mean gastric emptying time (h)	1
						Corneocyte length [bottom] CV (%) : Female	4.1	Fed CV gastric emptying time (%)	38
						Hydration level (% water volume) [bottom] : Female	67.4	Weibull Dist of transit time - alpha	2.92
						Hydration level (% water volume) [bottom] CV (%) : Female	4	Weibull Dist of transit time - beta	4.04
						SC lipid viscosity [bottom] centipose : Female	75	Mean colon transit time (h)	12
						SC lipid viscosity [bottom] CV (%) : Female	0	CV colon transit time (%)	30
						Viable Epidermis thickness µm : Female	46.8667	Initial volume of stomach fluid (mL) - Fed	1000
						Viable Epidermis thickness CV (%) : Female	24	Initial volume of stomach fluid CV (%) - Fed	30
						Dermis thickness µm : Female	1580	Initial volume of stomach fluid (mL) - Fasted	50
						Dermis thickness CV (%) : Female	20	Initial volume of stomach fluid CV (%) - Fasted	30
						Subcutis thickness mm : Female	1.91	Mean SITT (h)	3.33873
						Subcutis thickness CV (%) : Female	55.7	Ionic Product (Kw) (10-14 mol2/dm6)	2.4
						Muscle thickness mm : Female	12.6	Aqueous Diffusion Coefficients H+ (10-4 cm2/min)	6.94
						Muscle thickness CV (%) : Female	9.9	Aqueous Diffusion Coefficients OH- (10-4 cm2/min)	7.2
						Dermis regional blood flow scalar : Female	2.12619	Water Concentration (mM)	55560
						Dermis regional blood flow scalar CV (%) : Female	0	Bicarbonate pKa Type	Effective
						Subcutis regional blood flow scalar : Female	1	Bicarbonate pKa 1	4.2
						Subcutis regional blood flow scalar CV (%) : Female	0	Bicarbonate pKa 2	9.79
						Muscle regional blood flow scalar : Female	1	Aqueous Diffusion Coefficients 37oC (10-4 cm2/min) H2CO3	17.72
						Muscle regional blood flow scalar CV (%) : Female	0	Aqueous Diffusion Coefficients 37oC (10-4 cm2/min) HCO3-	9.85
								Aqueous Diffusion Coefficients 37oC (10-4 cm2/min) CO32-	6.98
						MPMLA - Lower Leg		Advanced Fluid Volume Dynamics Model	No
						Skin surface pH : Female	5.5	User Defined Intestinal Fluid Volumes?	No
						Skin surface pH CV (%) : Female	11	Fasted Jejunum I basal fluid volume (mL)	21.1
						Skin temperature °C : Female	32	Fasted Jejunum II basal fluid volume (mL)	21.1
						Skin temperature CV (%) : Female	0	Fasted Ileum I basal fluid volume (mL)	12.6
						Shape of corneocyte : Male	Cuboid (brick)	Fasted Ileum II basal fluid volume (mL)	12.6
						Shape of corneocyte : Female	Cuboid (brick)	Fasted Ileum III basal fluid volume (mL)	12.6
						Number of SC layers : Female	22	Fasted Ileum IV basal fluid volume (mL)	12.6
						Number of SC layers CV (%) : Female	9.1	Fasted Jejunum I-Ileum IV basal fluid volume %CV (%)	37
						Water density gm/cm3 : Female	1	Fasted Colon basal fluid volume (mL)	13
						Water density CV (%) : Female	0	Fasted Colon basal fluid volume %CV (%)	4.4
						SC lipids density gm/cm3 : Female	0.9	Fed Jejunum I basal fluid volume (mL)	21.1
						SC lipids density CV (%) : Female	0	Fed Jejunum II basal fluid volume (mL)	21.1
						SC proteins density gm/cm3 : Female	1.37	Fed Ileum I basal fluid volume (mL)	12.6
						SC proteins density CV (%) : Female	0	Fed Ileum II basal fluid volume (mL)	12.6
						Intercellular lipid thickness of SC µm : Female	0.091	Fed Ileum III basal fluid volume (mL)	12.6
						Intercellular lipid thickness of SC CV (%) : Female	0	Fed Ileum IV basal fluid volume (mL)	12.6
						Tortuosity : Female	User Defined	Fed Jejunum I-Ileum IV basal fluid volume %CV (%)	37
						Tortuosity of lipid diffusion pathway of SC : Female	12.7	Fed Colon basal fluid volume (mL)	13
						Tortuosity of lipid diffusion pathway of SC CV (%) : Female	18	Fed Colon basal fluid volume %CV (%)	4.4
						Hair follicle diameter µm : Female	168.4	Fasted stomach Total Content mean (g)	50
						Hair follicle diameter CV (%) : Female	26	Fasted stomach Total Content CV (%)	30
						Hair follicle density N/cm2 : Female	14	Fed stomach Total Content mean (g)	1000
						Hair follicle density CV (%) : Female	50	Fed stomach Total Content CV (%)	30
						Hair follicle depth µm : Female	613.5	Fasted duodenum Total Content mean (g)	34
						Hair follicle depth CV (%) : Female	0	Fasted duodenum Total Content CV (%)	30
						Hair shaft diameter µm : Female	42.1	Fed duodenum Total Content mean (g)	34
						Hair shaft diameter CV (%) : Female	29	Fed duodenum Total Content CV (%)	30
						Sebum viscosity centipose : Female	40	Fasted jejunum I Total Content mean (g)	23
						Sebum viscosity CV (%) : Female	0	Fasted jejunum I Total Content CV (%)	30
						Corneocyte pH [top] : Female	6.8	Fed jejunum I Total Content mean (g)	23
						Corneocyte pH [top] CV (%) : Female	6.8	Fed jejunum I Total Content CV (%)	30
						Corneocyte thickness [top] µm : Female	0.87	Fasted jejunum II Total Content mean (g)	23
						Corneocyte thickness [top] CV (%) : Female	9	Fasted jejunum II Total Content CV (%)	30
						Corneocyte width [top] µm : Female	29.6	Fed jejunum II Total Content mean (g)	23
						Corneocyte width [top] CV (%) : Female	5.9	Fed jejunum II Total Content CV (%)	30
						Corneocyte length [top] µm : Female	36.4	Fasted ileum I Total Content mean (g)	14
						Corneocyte length [top] CV (%) : Female	5.7	Fasted ileum I Total Content CV (%)	30
						Hydration level (% water volume) [top] : Female	33.9	Fed ileum I Total Content mean (g)	14
						Hydration level (% water volume) [top] CV (%) : Female	9	Fed ileum I Total Content CV (%)	30
						SC lipid viscosity [top] centipose : Female	75	Fasted ileum II Total Content mean (g)	14
						SC lipid viscosity [top] CV (%) : Female	0	Fasted ileum II Total Content CV (%)	30
						Corneocyte pH [upper mid] : Female	6.8	Fed ileum II Total Content mean (g)	14
						Corneocyte pH [upper mid] CV (%) : Female	6.8	Fed ileum II Total Content CV (%)	30
						Corneocyte thickness [upper mid] µm : Female	0.99	Fasted ileum III Total Content mean (g)	14
						Corneocyte thickness [upper mid] CV (%) : Female	9	Fasted ileum III Total Content CV (%)	30
						Corneocyte width [upper mid] µm : Female	29.6	Fed ileum III Total Content mean (g)	14
						Corneocyte width [upper mid] CV (%) : Female	5.9	Fed ileum III Total Content CV (%)	30
						Corneocyte length [upper mid] µm : Female	36.4	Fasted ileum IV Total Content mean (g)	14
						Corneocyte length [upper mid] CV (%) : Female	5.7	Fasted ileum IV Total Content CV (%)	30
						Hydration level (% water volume) [upper mid] : Female	44.6987	Fed ileum IV Total Content mean (g)	14
						Hydration level (% water volume) [upper mid] CV (%) : Female	6	Fed ileum IV Total Content CV (%)	30
						SC lipid viscosity [upper mid] centipose : Female	75	Fasted colon Total Content mean (g)	133.29
						SC lipid viscosity [upper mid] CV (%) : Female	0	Fasted colon Total Content CV (%)	62.2
						Corneocyte pH [lower mid] : Female	6.8	Fed colon Total Content mean (g)	133.29
						Corneocyte pH [lower mid] CV (%) : Female	6.8	Fed colon Total Content CV (%)	62.2
						Corneocyte thickness [lower mid] µm : Female	1.13
						Corneocyte thickness [lower mid] CV (%) : Female	9
						Corneocyte width [lower mid] µm : Female	29.6
						Corneocyte width [lower mid] CV (%) : Female	5.9
						Corneocyte length [lower mid] µm : Female	36.4
						Corneocyte length [lower mid] CV (%) : Female	5.7
						Hydration level (% water volume) [lower mid] : Female	55.5388
						Hydration level (% water volume) [lower mid] CV (%) : Female	5
						SC lipid viscosity [lower mid] centipose : Female	75
						SC lipid viscosity [lower mid] CV (%) : Female	0
						Corneocyte pH [bottom] : Female	6.8
						Corneocyte pH [bottom] CV (%) : Female	6.8
						Corneocyte thickness [bottom] µm : Female	1.27
						Corneocyte thickness [bottom] CV (%) : Female	9
						Corneocyte width [bottom] µm : Female	29.6
						Corneocyte width [bottom] CV (%) : Female	5.9
						Corneocyte length [bottom] µm : Female	36.4
						Corneocyte length [bottom] CV (%) : Female	5.7
						Hydration level (% water volume) [bottom] : Female	66.4
						Hydration level (% water volume) [bottom] CV (%) : Female	4
						SC lipid viscosity [bottom] centipose : Female	75
						SC lipid viscosity [bottom] CV (%) : Female	0
						Viable Epidermis thickness µm : Female	57.36
						Viable Epidermis thickness CV (%) : Female	8
						Dermis thickness µm : Female	1240
						Dermis thickness CV (%) : Female	20
						Subcutis thickness mm : Female	17.07
						Subcutis thickness CV (%) : Female	37.1
						Muscle thickness mm : Female	18.84
						Muscle thickness CV (%) : Female	18.63
						Dermis regional blood flow scalar : Female	0.839286
						Dermis regional blood flow scalar CV (%) : Female	0
						Subcutis regional blood flow scalar : Female	1
						Subcutis regional blood flow scalar CV (%) : Female	0
						Muscle regional blood flow scalar : Female	1
						Muscle regional blood flow scalar CV (%) : Female	0
						MPMLA - Thigh
						Skin surface pH : Female	5.5
						Skin surface pH CV (%) : Female	11
						Skin temperature °C : Female	32
						Skin temperature CV (%) : Female	0
						Shape of corneocyte : Male	Cuboid (brick)
						Shape of corneocyte : Female	Cuboid (brick)
						Number of SC layers : Female	21
						Number of SC layers CV (%) : Female	13
						Water density gm/cm3 : Female	1
						Water density CV (%) : Female	0
						SC lipids density gm/cm3 : Female	0.9
						SC lipids density CV (%) : Female	0
						SC proteins density gm/cm3 : Female	1.37
						SC proteins density CV (%) : Female	0
						Intercellular lipid thickness of SC µm : Female	0.091
						Intercellular lipid thickness of SC CV (%) : Female	0
						Tortuosity : Female	User Defined
						Tortuosity of lipid diffusion pathway of SC : Female	12.7
						Tortuosity of lipid diffusion pathway of SC CV (%) : Female	18
						Hair follicle diameter µm : Female	131.5
						Hair follicle diameter CV (%) : Female	31
						Hair follicle density N/cm2 : Female	17
						Hair follicle density CV (%) : Female	24
						Hair follicle depth µm : Female	315.1
						Hair follicle depth CV (%) : Female	0
						Hair shaft diameter µm : Female	29.2
						Hair shaft diameter CV (%) : Female	41
						Sebum viscosity centipose : Female	40
						Sebum viscosity CV (%) : Female	0
						Corneocyte pH [top] : Female	6.8
						Corneocyte pH [top] CV (%) : Female	6.8
						Corneocyte thickness [top] µm : Female	0.87
						Corneocyte thickness [top] CV (%) : Female	26
						Corneocyte width [top] µm : Female	34
						Corneocyte width [top] CV (%) : Female	15.1
						Corneocyte length [top] µm : Female	40.7
						Corneocyte length [top] CV (%) : Female	14.6
						Hydration level (% water volume) [top] : Female	33.9
						Hydration level (% water volume) [top] CV (%) : Female	9
						SC lipid viscosity [top] centipose : Female	75
						SC lipid viscosity [top] CV (%) : Female	0
						Corneocyte pH [upper mid] : Female	6.8
						Corneocyte pH [upper mid] CV (%) : Female	6.8
						Corneocyte thickness [upper mid] µm : Female	0.75
						Corneocyte thickness [upper mid] CV (%) : Female	26
						Corneocyte width [upper mid] µm : Female	34
						Corneocyte width [upper mid] CV (%) : Female	15.1
						Corneocyte length [upper mid] µm : Female	40.7
						Corneocyte length [upper mid] CV (%) : Female	14.6
						Hydration level (% water volume) [upper mid] : Female	44.6987
						Hydration level (% water volume) [upper mid] CV (%) : Female	6
						SC lipid viscosity [upper mid] centipose : Female	75
						SC lipid viscosity [upper mid] CV (%) : Female	0
						Corneocyte pH [lower mid] : Female	6.8
						Corneocyte pH [lower mid] CV (%) : Female	6.8
						Corneocyte thickness [lower mid] µm : Female	0.85
						Corneocyte thickness [lower mid] CV (%) : Female	26
						Corneocyte width [lower mid] µm : Female	34
						Corneocyte width [lower mid] CV (%) : Female	15.1
						Corneocyte length [lower mid] µm : Female	40.7
						Corneocyte length [lower mid] CV (%) : Female	14.6
						Hydration level (% water volume) [lower mid] : Female	55.5388
						Hydration level (% water volume) [lower mid] CV (%) : Female	5
						SC lipid viscosity [lower mid] centipose : Female	75
						SC lipid viscosity [lower mid] CV (%) : Female	0
						Corneocyte pH [bottom] : Female	6.8
						Corneocyte pH [bottom] CV (%) : Female	6.8
						Corneocyte thickness [bottom] µm : Female	0.96
						Corneocyte thickness [bottom] CV (%) : Female	26
						Corneocyte width [bottom] µm : Female	34
						Corneocyte width [bottom] CV (%) : Female	15.1
						Corneocyte length [bottom] µm : Female	40.7
						Corneocyte length [bottom] CV (%) : Female	14.6
						Hydration level (% water volume) [bottom] : Female	66.4
						Hydration level (% water volume) [bottom] CV (%) : Female	4
						SC lipid viscosity [bottom] centipose : Female	75
						SC lipid viscosity [bottom] CV (%) : Female	0
						Viable Epidermis thickness µm : Female	40
						Viable Epidermis thickness CV (%) : Female	19
						Dermis thickness µm : Female	1240
						Dermis thickness CV (%) : Female	20
						Subcutis thickness mm : Female	17.07
						Subcutis thickness CV (%) : Female	37.1
						Muscle thickness mm : Female	26.32
						Muscle thickness CV (%) : Female	42.45
						Dermis regional blood flow scalar : Female	0.839286
						Dermis regional blood flow scalar CV (%) : Female	0
						Subcutis regional blood flow scalar : Female	1
						Subcutis regional blood flow scalar CV (%) : Female	0
						Muscle regional blood flow scalar : Female	1
						Muscle regional blood flow scalar CV (%) : Female	0
						MPMLA - Back
						Skin surface pH : Female	5.2
						Skin surface pH CV (%) : Female	8.4
						Skin temperature °C : Female	32
						Skin temperature CV (%) : Female	0
						Shape of corneocyte : Male	Cuboid (brick)
						Shape of corneocyte : Female	Cuboid (brick)
						Number of SC layers : Female	18
						Number of SC layers CV (%) : Female	22.7
						Water density gm/cm3 : Female	1
						Water density CV (%) : Female	0
						SC lipids density gm/cm3 : Female	0.9
						SC lipids density CV (%) : Female	0
						SC proteins density gm/cm3 : Female	1.37
						SC proteins density CV (%) : Female	0
						Intercellular lipid thickness of SC µm : Female	0.091
						Intercellular lipid thickness of SC CV (%) : Female	0
						Tortuosity : Female	User Defined
						Tortuosity of lipid diffusion pathway of SC : Female	12.7
						Tortuosity of lipid diffusion pathway of SC CV (%) : Female	18
						Hair follicle diameter µm : Female	105.3
						Hair follicle diameter CV (%) : Female	60
						Hair follicle density N/cm2 : Female	29
						Hair follicle density CV (%) : Female	31
						Hair follicle depth µm : Female	446.5
						Hair follicle depth CV (%) : Female	0
						Hair shaft diameter µm : Female	18.2
						Hair shaft diameter CV (%) : Female	37
						Sebum viscosity centipose : Female	40
						Sebum viscosity CV (%) : Female	0
						Corneocyte pH [top] : Female	6.8
						Corneocyte pH [top] CV (%) : Female	6.8
						Corneocyte thickness [top] µm : Female	0.59
						Corneocyte thickness [top] CV (%) : Female	30
						Corneocyte width [top] µm : Female	29.6
						Corneocyte width [top] CV (%) : Female	5.9
						Corneocyte length [top] µm : Female	36.4
						Corneocyte length [top] CV (%) : Female	5.7
						Hydration level (% water volume) [top] : Female	33.9
						Hydration level (% water volume) [top] CV (%) : Female	9
						SC lipid viscosity [top] centipose : Female	75
						SC lipid viscosity [top] CV (%) : Female	0
						Corneocyte pH [upper mid] : Female	6.8
						Corneocyte pH [upper mid] CV (%) : Female	6.8
						Corneocyte thickness [upper mid] µm : Female	0.67
						Corneocyte thickness [upper mid] CV (%) : Female	30
						Corneocyte width [upper mid] µm : Female	29.6
						Corneocyte width [upper mid] CV (%) : Female	5.9
						Corneocyte length [upper mid] µm : Female	36.4
						Corneocyte length [upper mid] CV (%) : Female	5.7
						Hydration level (% water volume) [upper mid] : Female	44.6987
						Hydration level (% water volume) [upper mid] CV (%) : Female	6
						SC lipid viscosity [upper mid] centipose : Female	75
						SC lipid viscosity [upper mid] CV (%) : Female	0
						Corneocyte pH [lower mid] : Female	6.8
						Corneocyte pH [lower mid] CV (%) : Female	6.8
						Corneocyte thickness [lower mid] µm : Female	0.76
						Corneocyte thickness [lower mid] CV (%) : Female	30
						Corneocyte width [lower mid] µm : Female	29.6
						Corneocyte width [lower mid] CV (%) : Female	5.9
						Corneocyte length [lower mid] µm : Female	36.4
						Corneocyte length [lower mid] CV (%) : Female	5.7
						Hydration level (% water volume) [lower mid] : Female	55.5388
						Hydration level (% water volume) [lower mid] CV (%) : Female	5
						SC lipid viscosity [lower mid] centipose : Female	75
						SC lipid viscosity [lower mid] CV (%) : Female	0
						Corneocyte pH [bottom] : Female	6.8
						Corneocyte pH [bottom] CV (%) : Female	6.8
						Corneocyte thickness [bottom] µm : Female	0.86
						Corneocyte thickness [bottom] CV (%) : Female	30
						Corneocyte width [bottom] µm : Female	29.6
						Corneocyte width [bottom] CV (%) : Female	5.9
						Corneocyte length [bottom] µm : Female	36.4
						Corneocyte length [bottom] CV (%) : Female	5.7
						Hydration level (% water volume) [bottom] : Female	66.4
						Hydration level (% water volume) [bottom] CV (%) : Female	4
						SC lipid viscosity [bottom] centipose : Female	75
						SC lipid viscosity [bottom] CV (%) : Female	0
						Viable Epidermis thickness µm : Female	45.655
						Viable Epidermis thickness CV (%) : Female	15
						Dermis thickness µm : Female	1240
						Dermis thickness CV (%) : Female	20
						Subcutis thickness mm : Female	6.93
						Subcutis thickness CV (%) : Female	34.9
						Muscle thickness mm : Female	19.3
						Muscle thickness CV (%) : Female	6.22
						Dermis regional blood flow scalar : Female	1.03512
						Dermis regional blood flow scalar CV (%) : Female	0
						Subcutis regional blood flow scalar : Female	1
						Subcutis regional blood flow scalar CV (%) : Female	0
						Muscle regional blood flow scalar : Female	1
						Muscle regional blood flow scalar CV (%) : Female	0
						MPMLA - Physiology B
						Skin surface pH : Female	0
						Skin surface pH CV (%) : Female	0
						Skin temperature °C : Female	0
						Skin temperature CV (%) : Female	0
						Shape of corneocyte : Male	Cuboid (brick)
						Shape of corneocyte : Female	Cuboid (brick)
						Number of SC layers : Female	0
						Number of SC layers CV (%) : Female	0
						Water density gm/cm3 : Female	0
						Water density CV (%) : Female	0
						SC lipids density gm/cm3 : Female	0
						SC lipids density CV (%) : Female	0
						SC proteins density gm/cm3 : Female	0
						SC proteins density CV (%) : Female	0
						Intercellular lipid thickness of SC µm : Female	0
						Intercellular lipid thickness of SC CV (%) : Female	0
						Tortuosity : Female	User Defined
						Tortuosity of lipid diffusion pathway of SC : Female	0
						Tortuosity of lipid diffusion pathway of SC CV (%) : Female	0
						Hair follicle diameter µm : Female	0
						Hair follicle diameter CV (%) : Female	0
						Hair follicle density N/cm2 : Female	0
						Hair follicle density CV (%) : Female	0
						Hair follicle depth µm : Female	0
						Hair follicle depth CV (%) : Female	0
						Hair shaft diameter µm : Female	0
						Hair shaft diameter CV (%) : Female	0
						Sebum viscosity centipose : Female	0
						Sebum viscosity CV (%) : Female	0
						Corneocyte pH [top] : Female	0
						Corneocyte pH [top] CV (%) : Female	0
						Corneocyte thickness [top] µm : Female	0
						Corneocyte thickness [top] CV (%) : Female	0
						Corneocyte width [top] µm : Female	0
						Corneocyte width [top] CV (%) : Female	0
						Corneocyte length [top] µm : Female	0
						Corneocyte length [top] CV (%) : Female	0
						Hydration level (% water volume) [top] : Female	0
						Hydration level (% water volume) [top] CV (%) : Female	0
						SC lipid viscosity [top] centipose : Female	0
						SC lipid viscosity [top] CV (%) : Female	0
						Corneocyte pH [upper mid] : Female	0
						Corneocyte pH [upper mid] CV (%) : Female	0
						Corneocyte thickness [upper mid] µm : Female	0
						Corneocyte thickness [upper mid] CV (%) : Female	0
						Corneocyte width [upper mid] µm : Female	0
						Corneocyte width [upper mid] CV (%) : Female	0
						Corneocyte length [upper mid] µm : Female	0
						Corneocyte length [upper mid] CV (%) : Female	0
						Hydration level (% water volume) [upper mid] : Female	0
						Hydration level (% water volume) [upper mid] CV (%) : Female	0
						SC lipid viscosity [upper mid] centipose : Female	0
						SC lipid viscosity [upper mid] CV (%) : Female	0
						Corneocyte pH [lower mid] : Female	0
						Corneocyte pH [lower mid] CV (%) : Female	0
						Corneocyte thickness [lower mid] µm : Female	0
						Corneocyte thickness [lower mid] CV (%) : Female	0
						Corneocyte width [lower mid] µm : Female	0
						Corneocyte width [lower mid] CV (%) : Female	0
						Corneocyte length [lower mid] µm : Female	0
						Corneocyte length [lower mid] CV (%) : Female	0
						Hydration level (% water volume) [lower mid] : Female	0
						Hydration level (% water volume) [lower mid] CV (%) : Female	0
						SC lipid viscosity [lower mid] centipose : Female	0
						SC lipid viscosity [lower mid] CV (%) : Female	0
						Corneocyte pH [bottom] : Female	0
						Corneocyte pH [bottom] CV (%) : Female	0
						Corneocyte thickness [bottom] µm : Female	0
						Corneocyte thickness [bottom] CV (%) : Female	0
						Corneocyte width [bottom] µm : Female	0
						Corneocyte width [bottom] CV (%) : Female	0
						Corneocyte length [bottom] µm : Female	0
						Corneocyte length [bottom] CV (%) : Female	0
						Hydration level (% water volume) [bottom] : Female	0
						Hydration level (% water volume) [bottom] CV (%) : Female	0
						SC lipid viscosity [bottom] centipose : Female	0
						SC lipid viscosity [bottom] CV (%) : Female	0
						Viable Epidermis thickness µm : Female	0
						Viable Epidermis thickness CV (%) : Female	0
						Dermis thickness µm : Female	0
						Dermis thickness CV (%) : Female	0
						Subcutis thickness mm : Female	0
						Subcutis thickness CV (%) : Female	0
						Muscle thickness mm : Female	0
						Muscle thickness CV (%) : Female	0
						Dermis regional blood flow scalar : Female	0
						Dermis regional blood flow scalar CV (%) : Female	0
						Subcutis regional blood flow scalar : Female	0
						Subcutis regional blood flow scalar CV (%) : Female	0
						Muscle regional blood flow scalar : Female	0
						Muscle regional blood flow scalar CV (%) : Female	0

## Sheet: Population Script
Brain Volume Script
function DefineBrainVolume(Age, HT, WT, isMale)_x000D_
-- The Equations defined in this script will only be used for individuals above the age of 17_x000D_
_x000D_
if isMale then_x000D_
BrVol = 1.390 - 0.0027 * Age_x000D_
else_x000D_
BrVol = 1.186 - 0.0015 * Age_x000D_
end_x000D_
_x000D_
return BrVol_x000D_
end_x000D_
Cardiac Output Script
function DefineCardiacOutput(age, WT, BSA)_x000D_
_x000D_
if age <= 25 then_x000D_
CO = BSA * (110 + (184.974*(math.exp(-0.0378 * age) - math.exp(-0.2477 * age))))_x000D_
else_x000D_
CO = BSA * 60 * (3 - 0.01 * (age - 20))_x000D_
end _x000D_
_x000D_
return CO_x000D_
end_x000D_

## Sheet: Custom Dosing - Sub
Wsp-Propofol_retrograde_Cyp2B6 Dosing
Dose Number	Day	Time	Offset (h)	Dose	Dose Units	Route of Administration	Calculate AUC	Duration (h)
1	1	09:00:00	0	1	mg/kg	iv	No	0.005
2	1	09:01:00	0.0166667	1.67	mg/kg	iv	No	0.167
3	1	09:11:00	0.183333	1.33	mg/kg	iv	No	0.167
4	1	09:21:00	0.35	12	mg/kg	iv	No	1.5

## Sheet: Demographic Data
				Statistics	Whole Population
					Age (Years)	Weight (kg)	Height (cm)	BSA (m²)	Brain Weight (g)	Kidney Weight (g)	Liver Weight (g)	BMI (kg/m²)	Cardiac Output (L/h)	Haematocrit (%)	HSA (g/L)	AGP (g/L)	Other (µM)	Serum Creatinine (µmol/L)	GFR (mL/min/1.73m²)	Renal Function	Allometric Scalar
				Mean	27.9978	76.735	172.089	1.89285	1327.12	334.858	1658.34	25.8814	338.846	41.373	47.2101	0.755105	0	70.6165	134.179	1.06016	1
				Median	26.3813	74.7772	172.964	1.88523	1348.31	325.633	1651.95	25.7693	336.573	41.9704	46.8851	0.721867	0	70.0847	130.09	1.01766	1
				Geometric Mean	27.3884	75.4239	171.839	1.88265	1318.41	323.963	1635.16	25.5427	336.74	41.2112	46.9699	0.734738	n/a	69.0597	131.428	1.03514	1
				90% confidence interval around the geometric mean(lower limit)	26.7311	73.7992	170.754	1.85981	1300.58	314.297	1603.21	25.0626	332.362	40.7826	46.4168	0.714806	n/a	67.3517	128.39	1.00961	1
				90% confidence interval around the geometric mean(upper limit)	28.0619	77.0843	172.931	1.90578	1336.49	333.926	1667.74	26.0319	341.175	41.6443	47.5295	0.755227	n/a	70.8109	134.538	1.06133	1
				5th centile	20.7691	55.7066	156.543	1.58804	1056.43	216.2	1216.46	20.096	278.592	35.3252	39.472	0.490025	0	47.6151	97.3069	0.749026	1
				95th centile	39.9723	101.813	185.935	2.21705	1554.26	491.234	2096.25	33.1651	403.609	46.7002	55.0085	1.07105	0	94.553	194.57	1.51146	1
				Skewness	0.763474	0.453502	-0.255867	0.0882999	-0.329101	0.536833	0.351949	0.583179	0.32727	-0.336056	0.194981	0.490256	n/a	0.191334	1.23302	1.41606	n/a
				cv	0.216335	0.186959	0.0536915	0.103766	0.112453	0.258428	0.168009	0.164512	0.112229	0.0874601	0.101235	0.23495	n/a	0.208356	0.214256	0.233032	0
				Min Val	18.1239	41.5033	146.815	1.35297	885.542	159.231	1087.24	16.7781	245.85	30.6754	36.5598	0.39516	0	36.4597	90.9766	0.69991	1
				Max Val	44.6583	119.612	192.066	2.41598	1753.87	583.877	2740.28	40.9231	465.812	49.1327	60.4138	1.368	0	111.051	240.685	2.0057	1
				Fold	2.46406	2.88199	1.30822	1.78568	1.98056	3.66686	2.5204	2.43908	1.8947	1.60169	1.65247	3.4619	n/a	3.04586	2.64557	2.86566	1
				Std Dev	6.05691	14.3463	9.23969	0.196412	149.239	86.5368	278.616	4.25779	38.0283	3.61848	4.77929	0.177412	0	14.7134	28.7486	0.247051	0
Index	Population	Trial	Sex	Sex Code	Age (Years)	Weight (kg)	Height (cm)	BSA (m²)	Brain Weight (g)	Kidney Weight (g)	Liver Weight (g)	BMI (kg/m²)	Cardiac Output (L/h)	Haematocrit (%)	HSA (g/L)	AGP (g/L)	Other (µM)	Serum Creatinine (µmol/L)	GFR (mL/min/1.73m²)	Renal Function	Allometric Scalar	Simulation Duration
1	0	1	M	1	34.1847	87.553	175.915	2.04021	1380.41	325.261	2353.01	28.2922	349.874	41.0192	45.5156	0.498397	0	74.55	129.455	0.995806	1	0.0547104
2	0	1	F	0	42.6539	55.7328	163.419	1.59628	1283.76	199.792	1317.78	20.8691	265.633	38.6604	42.2514	0.955983	0	62.5987	98.0836	0.817364	1	0.0528503
3	0	1	M	1	25.7629	95.1212	178.6	2.13673	1297.89	435.633	1948.94	29.8203	377.223	44.9843	44.3905	0.596604	0	74.3621	145.347	1.11805	1	0.053167
4	0	1	F	0	23.503	67.0938	163.832	1.73039	1159.22	318.403	1676.82	24.9969	321.045	37.3651	44.2425	0.480638	0	69.3821	117.61	0.980087	1	0.0509836
5	0	1	M	1	34.5095	71.8608	174.845	1.86767	1482.27	431.764	1500.92	23.5062	319.921	46.7123	50.8332	0.598391	0	58.9552	146.32	1.12554	1	0.0517207
6	0	1	F	0	24.7214	72.0867	162.911	1.77672	1380.18	269.383	1525.63	27.1616	323.809	37.4802	44.604	1.14492	0	50.9979	165.681	1.38068	1	0.0509161
7	0	1	F	0	26.7807	66.0505	170.687	1.77076	1277.55	244.335	1599.71	22.6713	311.532	36.5299	49.8757	0.490747	0	64.066	119.083	0.992362	1	0.060567
8	0	1	M	1	22.0956	54.4183	175.544	1.66432	1581.59	283.705	1526.62	17.6593	315.325	40.8757	47.2849	0.726203	0	68.9886	118.763	0.913564	1	0.0499997
9	0	1	M	1	25.363	84.1788	185.132	2.0821	1546.91	319.203	1690.41	24.5607	368.078	40.1673	49.814	0.39516	0	79.6417	123.682	0.951402	1	0.0494613
10	0	1	M	1	26.5635	74.75	174.831	1.8991	1584.72	417.291	1824.45	24.4555	334.36	44.1007	54.9809	0.522198	0	104.292	90.9884	0.69991	1	0.0513246
11	0	1	F	0	24.7112	62.6731	164.655	1.68711	1220.9	382.732	1302.26	23.117	307.523	36.6243	45.1038	0.634195	0	81.9533	94.406	0.786717	1	0.0531645
12	0	1	M	1	24.2415	95.1623	181.98	2.16636	1489.3	395.184	2085.31	28.7354	397.593	38.703	43.4175	0.709168	0	111.051	97.3163	0.748587	1	0.0540903
13	0	1	F	0	27.5398	59.0049	156.886	1.58779	1418.85	282.354	1682.97	23.9729	278.619	35.1309	50.497	0.535307	0	69.9875	107.873	0.898945	1	0.0528712
14	0	1	M	1	21.6653	93.6753	180.327	2.13772	1456.64	367.936	1965.95	28.8072	407.643	42.9157	51.732	0.862429	0	71.8638	153.354	1.17965	1	0.0557526
15	0	1	M	1	25.4123	70.9574	171.019	1.82809	1433.79	371.122	1664.72	24.2611	323.119	45.451	41.4086	0.655274	0	70.5084	134.066	1.03128	1	0.0500239
16	0	1	M	1	29.4826	82.1092	177.121	1.99516	1405.47	485.189	1843.14	26.173	347.778	44.5632	44.8057	0.859346	0	105.477	91.6449	0.704961	1	0.0508525
17	0	1	M	1	26.5041	79.0367	178.646	1.97533	1533.32	392.738	1423.29	24.7652	347.85	44.5854	49.8648	0.945051	0	58.4813	165.034	1.2695	1	0.0544607
18	0	1	F	0	21.4314	74.6348	156.981	1.75532	1281.2	377.292	1527.31	30.2863	335.903	38.0531	49.7225	0.594323	0	66.1557	137.667	1.14722	1	0.0596312
19	0	1	F	0	26.4772	74.0901	163.982	1.8061	1097.97	325.928	1620.33	27.5529	318.079	37.2074	49.1042	0.803628	0	51.8949	162.113	1.35094	1	0.0524826
20	0	1	M	1	32.1811	80.7985	170.525	1.92778	1353.5	315.863	1500.02	27.7861	332.912	41.7761	43.0462	0.721187	0	66.8199	143.733	1.10564	1	0.0567448
21	0	1	M	1	36.158	94.6114	184.607	2.18359	1297.61	251.71	1718.01	27.7619	371.877	40.063	51.7665	0.849704	0	85.3934	111.981	0.861389	1	0.0544501
22	0	1	F	0	23.865	89.3349	165.537	1.96902	1057.47	436.938	1663.88	32.601	363.374	37.4392	41.782	0.540505	0	49.9287	190.645	1.58871	1	0.0563888
23	0	1	F	0	24.4563	73.917	172.89	1.87485	1466.72	297.992	1794.68	24.7288	343.015	39.1311	60.4138	0.527421	0	54.1135	152.076	1.2673	1	0.0579438
24	0	1	M	1	30.9307	69.8344	173.106	1.83178	1480.12	368.939	1182.43	23.3048	317.706	45.5207	47.92	0.621138	0	90.9867	97.1278	0.747137	1	0.0518779
25	0	1	M	1	29.5292	76.4419	170.161	1.87999	1237.99	443.639	1357.9	26.4004	327.65	44.988	42.8891	0.954754	0	74.5566	128.044	0.984952	1	0.0504179
26	0	1	F	0	21.3103	52.3857	149.11	1.45487	1386.85	173.263	1475.35	23.5614	278.916	38.6511	45.7295	0.595447	0	50.6473	152.436	1.2703	1	0.0489687
27	0	1	M	1	27.4282	65.675	173.978	1.7911	1246.11	360.284	1607.75	21.6975	314.416	43.724	43.4856	0.969432	0	77.076	113.818	0.875524	1	0.0516929
28	0	1	M	1	39.4732	85.1499	175.614	2.01373	1360.25	378.188	1970.33	27.6099	338.943	43.5666	48.8654	0.535447	0	96.1568	93.9522	0.722709	1	0.0506342
29	0	1	M	1	34.4158	76.1152	188.541	2.02144	1257.23	315.035	1760.8	21.4122	346.375	43.4881	47.5491	0.64495	0	61.1023	138.285	1.06373	1	0.0507972
30	0	1	F	0	28.7906	92.3683	173.533	2.06665	1367.3	319.863	1699.93	30.673	361.096	38.587	37.4349	0.68004	0	69.0707	130	1.08334	1	0.0522362
31	0	1	M	1	34.5466	76.6772	184.247	1.99418	1140.23	381.819	1882.2	22.5873	341.548	38.2282	48.0038	0.815525	0	87.6945	98.2678	0.755906	1	0.0556957
32	0	1	M	1	35.6455	102.299	180.384	2.21976	1230.51	443.524	1821.63	31.4396	378.719	45.9942	55.7824	0.860049	0	68.5367	149.134	1.14718	1	0.0526092
33	0	1	F	0	24.7824	41.5033	154.629	1.35297	1324.42	258.601	1186.85	17.358	246.363	35.3354	55.0096	0.891208	0	51.3763	124.277	1.03564	1	0.0509948
34	0	1	M	1	23.5501	107.416	177.557	2.24047	1353.85	548.824	1816.52	34.0719	415.393	41.1929	39.9044	0.753262	0	60.7825	195.215	1.50165	1	0.0531894
35	0	1	M	1	28.946	83.5966	177.977	2.01749	1432.04	327.65	2097.68	26.3913	352.318	47.1131	50.0825	0.645468	0	61.6669	158.592	1.21994	1	0.0517505
36	0	1	M	1	20.7937	88.7049	171.011	2.00996	1254.46	501.241	2183.45	30.3317	388.352	41.8357	53.7316	0.707268	0	108.876	102.695	0.789959	1	0.05318
37	0	1	F	0	22.4922	77.9372	161.773	1.82732	1050.01	337.596	1659.88	29.7806	344.158	37.591	44.3226	0.635589	0	50.0529	180.888	1.5074	1	0.0553593
38	0	1	F	0	30.6641	65.8114	170.098	1.7636	1077.53	286.928	1530.58	22.746	306.164	39.9329	46.0272	0.57489	0	53.2949	138.299	1.15249	1	0.0557197
39	0	1	M	1	26.3848	80.8667	171.153	1.93363	1349.65	329.804	1945.43	27.6057	340.645	42.9099	39.5331	0.698414	0	92.4756	109.201	0.840009	1	0.0599414
40	0	1	M	1	29.6155	69.0195	178.52	1.86381	1333.3	231.173	1579.21	21.6571	324.733	44.1369	45.9087	0.9638	0	63.8623	136.037	1.04644	1	0.0497318
41	0	1	F	0	21.6301	88.9517	166.167	1.97084	1093.15	267.048	1802	32.2154	376.02	32.8671	42.7259	0.981475	0	54.6809	176.501	1.47085	1	0.0800351
42	0	1	M	1	30.4207	74.8045	174.397	1.89627	1480.58	313.886	1766.71	24.5953	329.473	38.974	51.0897	0.853172	0	72.9733	125.896	0.968433	1	0.0590342
43	0	1	M	1	22.7854	79.1541	168.696	1.89613	1388.9	356.584	1895.49	27.8141	355.56	39.7826	52.6082	0.621432	0	80.717	128.838	0.991062	1	0.0536957
44	0	1	M	1	20.3019	81.561	180.149	2.01409	1398.3	323.971	1873.97	25.1316	392.056	40.6029	44.1787	0.946849	0	93.5537	110.116	0.847049	1	0.058506
45	0	1	M	1	25.416	70.0311	175.034	1.84875	1372.59	248.736	1678.02	22.8584	326.768	42.084	47.3897	0.587295	0	71.9469	128.217	0.986285	1	0.0505283
46	0	1	F	0	43.136	79.8782	159.424	1.82705	1015.4	327.191	1166.1	31.4283	303.506	39.653	44.1853	0.698161	0	57.3498	133.398	1.11165	1	0.0569785
47	0	1	F	0	26.019	68.617	159.012	1.70957	1183.8	240.064	1856.77	27.1376	301.549	42.6685	50.0802	0.882313	0	61.4224	134.552	1.12127	1	0.048226
48	0	1	M	1	21.8448	74.821	180.634	1.94539	1552.44	438.535	1487.63	22.9311	369.966	40.8308	40.0086	0.516454	0	85.9766	112.334	0.864109	1	0.0842595
49	0	1	M	1	21.5172	79.0187	174.629	1.94283	1257.34	256.976	1745.39	25.9119	371.306	41.1253	41.3768	0.998946	0	79.0598	129.544	0.99649	1	0.0550566
50	0	1	M	1	38.4083	88.0548	176.275	2.04821	1468.81	383.887	1913.16	28.3383	346.055	43.3705	45.0377	0.717672	0	74.591	124.444	0.957259	1	0.0586894
51	0	1	M	1	26.3778	83.0196	184.971	2.06856	1246.69	572.79	1839.2	24.2646	364.426	41.7291	48.1559	1.18835	0	81.4689	118.961	0.915085	1	0.0543009
52	0	1	M	1	22.0967	100.67	173.945	2.14732	1413.09	426.911	1824.84	33.2717	406.828	44.7112	44.5671	0.979046	0	85.7242	137.04	1.05415	1	0.0625885
53	0	1	M	1	26.6411	67.8217	171.651	1.79811	1214.76	327.469	1587.61	23.0184	316.495	38.8335	57.0432	1.368	0	65.5335	138.665	1.06665	1	0.051693
54	0	1	F	0	24.0345	94.5172	164.545	2.00801	1326.25	281.631	1340.81	34.9093	369.649	34.9556	45.4419	0.912819	0	40.9701	240.685	2.0057	1	0.0530955
55	0	1	M	1	23.9001	71.8268	188.776	1.97401	1364.2	376.381	1902.78	20.1554	364.109	46.7616	46.0834	0.74857	0	89.3855	100.444	0.772644	1	0.0534163
56	0	1	M	1	33.3751	58.5251	157.155	1.58426	1325.25	213.001	1159.14	23.6965	272.453	46.1351	52.0958	1.17112	0	61.1454	136.909	1.05315	1	0.0913957
57	0	1	M	1	25.4092	74.4884	166.791	1.83265	1654.8	362.092	1503.4	26.7759	323.928	41.5835	43.5864	0.636736	0	66.336	149.222	1.14786	1	0.0530024
58	0	1	M	1	37.4557	82.2989	175.441	1.98337	1244.49	464.2	1906.03	26.7383	336.233	43.2993	52.9105	0.735011	0	63.8195	141.7	1.09	1	0.0598421
59	0	1	M	1	28.4974	97.8197	185.919	2.22616	1349.12	281.573	2013.34	28.2996	389.359	43.4304	46.4435	0.638043	0	65.6074	158.717	1.2209	1	0.0531262
60	0	1	M	1	19.0521	119.612	172.21	2.29384	1265.78	397.06	2247.65	40.3328	455.031	44.0726	52.5677	0.800478	0	86.9104	154.227	1.18636	1	0.0482828
61	0	1	M	1	28.9178	84.9404	189.072	2.12224	1378.2	434.675	1904.46	23.7607	370.648	37.0751	45.2823	0.657936	0	78.6406	120.154	0.924262	1	0.0571396
62	0	1	M	1	25.8381	93.4097	181.989	2.14939	1410.2	458.238	1921.82	28.2034	379.361	42.628	47.899	0.887448	0	74.7438	141.073	1.08518	1	0.0558102
63	0	1	M	1	27.1869	87.844	173.605	2.02361	1418.79	458.192	1792.13	29.1467	355.523	43.7493	47.8967	0.559163	0	67.051	155.225	1.19404	1	0.0523586
64	0	1	M	1	25.8613	55.7931	168.349	1.63179	1434.48	252.168	1391.14	19.6861	287.984	47.4093	44.7723	0.5874	0	78.4146	105.772	0.813634	1	0.057105
65	0	1	M	1	25.7511	63.5586	170.991	1.7443	1366.26	233.56	1362.47	21.7384	307.955	41.7393	52.8755	0.941398	0	72.8838	121.393	0.933796	1	0.0511269
66	0	1	F	0	24.0896	76.7584	170.14	1.88313	1051.87	422.207	1641.13	26.5163	346.38	38.5303	55.0084	0.728151	0	70.0697	121.809	1.01507	1	0.0920929
67	0	1	M	1	23.153	67.5287	177.243	1.83701	1276.13	343.224	2000.17	21.4957	342.596	39.7368	53.8548	0.754994	0	97.9735	93.1769	0.716745	1	0.0563053
68	0	1	F	0	28.6017	65.8085	164.103	1.71829	1352.83	297.521	1335.06	24.437	300.424	34.8176	39.3439	0.707684	0	56.5614	136.265	1.13554	1	0.0615556
69	0	1	F	0	30.9505	65.8069	162.613	1.70694	1056.49	257.752	1300.48	24.8863	296.035	37.0636	44.7952	0.454462	0	53.6555	141.548	1.17956	1	0.0506091
70	0	1	M	1	22.0822	81.6521	170.844	1.93904	1470.71	306.025	1791.27	27.9749	367.448	40.5046	53.0918	0.599134	0	98.1742	107.494	0.826877	1	0.18744
71	0	1	F	0	26.5643	60.7986	164.435	1.66386	1401.96	343.776	1523.3	22.4857	292.942	34.1098	44.0481	0.819014	0	66.8509	112.011	0.933424	1	0.0507952
72	0	1	M	1	39.9029	65.4867	176.157	1.80513	1306.02	550.113	1504.55	21.1034	303.368	42.7244	54.2406	1.07467	0	54.7085	141.069	1.08515	1	0.0522198
73	0	1	F	0	21.5343	56.3764	163.942	1.6078	949.339	305.362	1221.78	20.9759	307.197	35.3786	50.6583	0.721563	0	67.2263	111.625	0.930204	1	0.0545182
74	0	1	M	1	31.6455	60.0316	168.559	1.6849	1753.87	482.686	1497.63	21.1288	291.508	43.0221	58.722	1.07086	0	61.2264	134.01	1.03084	1	0.0500611
75	0	1	F	0	30.4135	82.124	157.373	1.83143	990.67	396.469	1844.7	33.1595	318.215	37.1335	42.7466	0.631834	0	60.6327	146.41	1.22008	1	0.059254
76	0	1	M	1	31.759	80.0395	181.585	2.00957	1356.1	315.429	1502.09	24.2743	347.544	46.0773	53.2889	0.838979	0	69.0821	132.632	1.02025	1	0.0523683
77	0	1	F	0	34.3965	72.4174	152.566	1.69749	980.354	439.768	1396.57	31.1119	290.885	33.4338	44.2839	0.697974	0	76.0567	107.008	0.891735	1	0.0528186
78	0	1	M	1	39.9684	94.3395	173.778	2.0874	1411.3	436.586	1818.31	31.2397	350.723	41.2267	43.2082	0.70664	0	65.9795	145.625	1.12019	1	0.0896055
79	0	1	F	0	18.1239	62.9246	165.589	1.69693	1390.75	341.527	1354.16	22.9487	341.352	38.2616	43.6987	0.653735	0	60.2181	135.578	1.12982	1	0.0544454
80	0	1	M	1	36.34	86.9333	180.811	2.07495	1547.06	364.424	1701.04	26.5911	353.149	42.524	56.9627	0.635944	0	82.5526	111.81	0.860076	1	0.0550517
81	0	1	M	1	19.9988	92.7476	181.195	2.13612	1341.41	496.598	2069.03	28.2495	417.722	42.8959	46.9149	0.706635	0	64.3171	172.17	1.32439	1	0.0522112
82	0	1	F	0	24.2909	72.0717	161.503	1.76542	1126.21	281.367	1789.34	27.6315	323.774	39.2267	39.0391	0.458216	0	61.1029	139.657	1.16381	1	0.0940327
83	0	1	M	1	22.2373	59.8604	169.507	1.68971	1263.24	305.548	1467.02	20.8337	319.456	40.5261	49.4451	0.944151	0	71.6643	123.724	0.951726	1	0.0603438
84	0	1	M	1	32.5598	101.787	186.241	2.26695	1310.11	329.793	1889.19	29.3455	390.967	45.3256	40.8131	0.712367	0	56.0053	183.068	1.40821	1	0.0513934
85	0	1	M	1	41.0287	74.3217	177.829	1.91797	1349.13	382.056	1630.82	23.5023	321.036	40.8025	48.5648	0.715384	0	78.552	103.764	0.798186	1	0.0514234
86	0	1	F	0	21.7365	106.004	172.823	2.18469	1273.97	270.443	1953.89	35.4912	416.152	33.5905	47.0388	0.554295	0	49.5741	209.108	1.74256	1	0.0578319
87	0	1	M	1	44.6583	98.363	184.255	2.21691	1341.26	309.147	1840.04	28.9731	366.245	44.0587	41.1006	0.775787	0	89.2855	100.695	0.774576	1	0.0905215
88	0	1	M	1	36.3566	68.4459	182.092	1.88408	1475.33	358.785	1578.15	20.6426	320.645	42.399	37.0892	0.750899	0	82.5872	96.8941	0.74534	1	0.0507249
89	0	1	M	1	24.2523	58.8017	171.017	1.68776	1509.71	303.18	1295.23	20.1054	309.706	38.9235	53.6685	1.01801	0	76.1782	112.508	0.865445	1	0.0499153
90	0	1	M	1	28.8492	85.2987	181.449	2.06354	1134.03	245.34	1656.64	25.908	360.481	46.1861	52.5973	0.602454	0	84.4621	115.612	0.88932	1	0.0515908
91	0	1	F	0	21.0124	61.3795	161.612	1.64976	1184.98	329.881	1561.2	23.5004	317.704	43.9852	44.1919	0.879009	0	80.8814	98.8774	0.823979	1	0.0528979
92	0	1	M	1	37.7724	75.1607	173.731	1.89484	1419.79	355.927	1447.15	24.9021	320.866	42.4652	46.3131	0.706204	0	79.9405	107.805	0.829272	1	0.0563768
93	0	1	M	1	40.379	77.8026	160.982	1.8195	1439.24	289.965	1832.39	30.0221	305.262	46.6995	48.9586	0.977528	0	84.7602	106.813	0.821637	1	0.0513561
94	0	1	M	1	22.8416	64.9374	171.37	1.76311	1416.94	479.741	1195.83	22.1118	330.34	49.1327	42.5732	0.888764	0	78.3206	117.094	0.900723	1	0.0526447
95	0	1	F	0	34.5513	102.521	158.279	2.02089	1297.37	450.536	1525.52	40.9231	346.117	35.3694	48.4758	0.656153	0	47.3593	204.055	1.70046	1	0.05068
96	0	1	F	0	21.065	54.739	162.47	1.57744	1073.67	231.337	1360.94	20.7372	303.536	35.9697	43.7332	0.595447	0	52.2721	142.634	1.18862	1	0.0523198
97	0	1	M	1	35.1233	75.5349	178.72	1.93823	1218.49	298.009	1806.74	23.6483	331.293	46.591	48.9486	0.971404	0	85.6936	101.367	0.779743	1	0.0518943
98	0	1	M	1	26.1441	99.2957	182.724	2.2124	1502.85	278.813	2177.47	29.7399	390.076	41.9452	56.7446	0.989313	0	88.3872	122.872	0.945173	1	0.0530557
99	0	1	M	1	25.2538	74.6619	168.473	1.84786	1355.75	521.731	1678.55	26.305	326.789	42.2604	42.6258	0.773516	0	78.8737	124.928	0.960982	1	0.0517634
100	0	1	M	1	36.8148	73.5421	163.837	1.79925	1316.29	272.478	1557.59	27.3977	305.713	43.8092	47.1992	1.12816	0	74.8004	119.834	0.921799	1	0.0571356
101	0	1	M	1	28.8159	60.1842	177.516	1.75123	1486.6	193.592	1504.52	19.0988	305.959	42.7221	43.8766	0.606434	0	71.2223	114.021	0.877088	1	0.0500892
102	0	1	M	1	24.5823	74.6888	170.458	1.8639	1322.92	325.42	1729.91	25.7052	340.386	45.8184	44.2373	0.800332	0	70.0998	140.22	1.07862	1	0.0558354
103	0	1	M	1	41.2844	57.28	162.692	1.60975	1396.78	251.912	1339.34	21.6407	269.197	41.899	48.97	0.997955	0	77.7693	95.994	0.738415	1	0.0547767
104	0	1	M	1	29.8168	86.3126	180.879	2.06921	1429.37	346.906	1901.34	26.3815	360.269	44.4531	46.5103	1.15193	0	86.9778	112.305	0.863885	1	0.0522617
105	0	1	F	0	24.3678	63.0925	156.49	1.63065	1294.52	240.754	1445.83	25.7634	298.721	36.1135	48.3639	0.899377	0	52.6071	153.636	1.2803	1	0.0490394
106	0	1	F	0	24.1949	65.8992	162.062	1.70376	1136	268.734	1358.73	25.0909	312.906	39.1394	48.5716	0.611151	0	49.7966	162.494	1.35412	1	0.0509609
107	0	1	M	1	34.0525	78.3404	167.764	1.88026	1418.01	276.688	1361.07	27.8348	322.593	41.9956	39.3332	0.642649	0	81.947	114.485	0.880653	1	0.0610276
108	0	1	M	1	43.4713	66.7436	156.977	1.67387	1347.49	275.423	1401.1	27.0856	277.724	44.2958	49.7894	0.63695	0	81.3266	100.585	0.773732	1	0.0544619
109	0	1	M	1	19.0492	70.796	179.361	1.89048	1562.94	351.569	1660.15	22.0066	375.033	38.7916	47.8904	0.72217	0	68.4493	140.636	1.08182	1	0.0508495
110	0	1	M	1	25.9943	86.9137	173.332	2.01218	1242.86	356.873	1856.24	28.9287	354.955	46.1883	46.8552	0.549431	0	79.8359	131.091	1.00839	1	0.0519943
111	0	1	M	1	32.4206	94.411	175.62	2.10411	1214.69	261.973	1865.72	30.6108	363.058	42.7894	44.1599	0.696563	0	86.2312	118.971	0.915163	1	0.0501639
112	0	1	M	1	23.9872	82.6923	174.908	1.98302	1570.03	304.968	1892.41	27.03	365.302	45.7159	52.3254	0.870493	0	78.9815	130.179	1.00138	1	0.0498715
113	0	1	F	0	27.8765	53.621	165.757	1.58654	1433.99	345.434	1238.48	19.5161	278.079	35.4402	45.5717	0.722423	0	61.0554	112.124	0.934365	1	0.074991
114	0	1	F	0	21.2939	65.61	160.829	1.69119	1039.09	397.956	1087.24	25.3654	324.303	36.9915	49.4545	0.655695	0	56.2596	147.875	1.23229	1	0.055063
115	0	1	M	1	32.2608	69.2092	158.692	1.71332	1205.96	245.178	1438.51	27.4823	295.794	45.149	48.7264	1.05983	0	58.6102	157.814	1.21396	1	0.0516066
116	0	1	M	1	39.9181	88.1188	188.881	2.15406	1246.12	356.813	2065.32	24.6997	361.987	44.9427	40.2688	0.970786	0	62.7446	138.679	1.06676	1	0.0871899
117	0	1	M	1	29.9128	59.6195	169.843	1.68924	1528.18	262.45	1617.91	20.6678	294.016	42.1164	42.7722	0.517971	0	81.9324	100.786	0.775277	1	0.0516249
118	0	1	M	1	28.8325	68.8897	174.345	1.83064	1331	345.225	1571.09	22.664	319.814	41.229	50.4153	0.578302	0	93.0008	95.6012	0.735394	1	0.0512128
119	0	1	M	1	20.9339	113.665	190.598	2.41598	1561.83	508.216	2167.05	31.289	465.812	42.8657	46.422	0.711846	0	101.622	117.154	0.901181	1	0.0535183
120	0	1	M	1	26.1858	85.6173	172.253	1.99033	1458.44	375.715	2046.46	28.8556	350.872	48.3485	40.9001	1.07671	0	91.4098	113.831	0.875625	1	0.0597695
121	0	1	F	0	25.9065	72.5492	160.184	1.75988	1089.52	302.548	1675.93	28.2745	310.542	37.5032	47.9042	0.891991	0	36.4597	233.044	1.94203	1	0.0599356
122	0	1	M	1	25.7959	99.4636	184.2	2.22694	1307.26	301.652	1918.17	29.3145	393.106	47.5926	51.1444	0.688918	0	55.7261	194.536	1.49643	1	0.0494776
123	0	1	F	0	29.9668	106.614	172.035	2.18278	1322.16	384.619	2263.73	36.0232	379.848	37.7682	47.6332	0.428574	0	42.5112	228.384	1.9032	1	0.208672
124	0	1	M	1	23.3301	67.8182	171.998	1.8007	1425.83	256.731	1488.82	22.9246	334.946	45.5201	52.5181	0.958631	0	95.9566	97.3218	0.748629	1	0.0686408
125	0	1	M	1	29.6179	68.8197	173.542	1.82374	1306.39	319.263	1774.71	22.851	317.748	39.4323	53.9678	0.63368	0	70.8937	124.872	0.960552	1	0.106509
126	0	1	M	1	39.5608	77.6321	175.473	1.93502	1491.06	226.665	1538.04	25.2128	325.594	45.6447	44.65	0.841732	0	59.4451	144.067	1.10821	1	0.0519466
127	0	1	M	1	27.7635	57.5983	179.004	1.72928	1362.89	266.514	1522.43	17.9757	303.215	43.9654	43.4606	0.912624	0	52.5722	151.128	1.16252	1	0.0522889
128	0	1	M	1	28.3433	75.9498	166.91	1.8488	1409.94	391.911	1334.86	27.2624	323.528	42.8479	54.7688	0.890279	0	72.1341	135.146	1.03958	1	0.0563586
129	0	1	M	1	24.2929	86.8079	178.465	2.05414	1518.18	362.094	2251.55	27.2554	376.714	41.8863	49.3342	0.980472	0	94.4791	109.995	0.846119	1	0.0560772
130	0	1	F	0	27.2059	70.6936	152.346	1.67844	1071	339.248	1497.67	30.459	294.863	35.4148	52.2163	0.708916	0	39.3604	218.042	1.81702	1	0.0646085
131	0	1	M	1	35.2158	82.1502	165.271	1.89787	1372.27	291.264	1151.9	30.0758	324.291	44.0016	45.5273	0.891669	0	84.3021	114.346	0.879585	1	0.0546045
132	0	1	M	1	24.5221	86.8482	175.274	2.02785	1198.08	258.325	1544.85	28.2699	370.651	39.9242	48.0468	0.664213	0	100.426	104.664	0.805109	1	0.053953
133	0	1	M	1	24.1192	82.5335	170.516	1.9452	1382.63	230.151	1775.49	28.3856	357.643	43.5529	50.4972	0.871667	0	63.5218	164.504	1.26541	1	0.0548368
134	0	1	M	1	23.7652	64.5399	173.9	1.7773	1259.69	255.295	1629.7	21.3416	328.477	44.2042	44.6496	0.486564	0	64.2619	139.596	1.07381	1	0.0528255
135	0	1	M	1	21.9332	73.0947	178.801	1.91199	1320.81	297.972	1798.41	22.8636	363.134	46.4599	46.2506	0.738003	0	77.973	123.028	0.94637	1	0.0526287
136	0	1	M	1	33.9732	80.0807	185.776	2.04354	1366.39	341.234	2003.59	23.2031	350.705	42.0569	47.1534	0.873433	0	80.4843	109.716	0.84397	1	0.0611241
137	0	1	F	0	21.7067	74.1977	169.666	1.85242	1085.67	217.728	1699.19	25.7752	353.017	39.6771	39.4787	0.769955	0	52.8141	162.07	1.35059	1	0.054312
138	0	1	F	0	21.2253	61.1262	165.038	1.6721	1143.95	256.151	1403.43	22.4418	320.973	35.4995	53.2273	0.529866	0	50.8082	154.382	1.28652	1	0.055896
139	0	1	M	1	25.7952	57.3102	184.818	1.76606	1236.61	350.713	1563.37	16.7781	311.749	40.0187	47.5652	0.746051	0	63.4637	124.11	0.954695	1	0.0519313
140	0	1	M	1	32.0338	85.4613	183.846	2.08496	1315.75	464.938	1892.92	25.285	360.238	46.2525	51.9881	0.880931	0	78.738	119.453	0.91887	1	0.0546142
141	0	1	M	1	22.5112	99.8146	180.919	2.20141	1405.6	485.644	2269.57	30.4947	414.496	40.4458	45.7781	0.605137	0	71.3849	158.601	1.22001	1	0.0546341
142	0	1	M	1	29.8729	86.0366	172.854	1.99951	1225.59	318.473	1774.86	28.7956	348.067	48.5353	50.5963	0.863442	0	62.0487	162.309	1.24853	1	0.0550961
143	0	1	F	0	24.5725	75.7232	154.003	1.7418	1247.1	308.149	1308.24	31.9278	318.133	43.1592	37.0138	0.626381	0	45.9375	197.339	1.64449	1	0.0540281
144	0	1	M	1	33.7838	94.8608	173.585	2.09062	1512.39	334.169	1688.94	31.4819	359.022	42.6344	43.9685	0.765839	0	77.6349	131.937	1.0149	1	0.0522599
145	0	1	M	1	33.7424	111.525	180.33	2.30224	1400.99	435.248	2740.28	34.2955	395.42	38.6262	43.9088	0.605223	0	88.6248	123.438	0.949527	1	0.0522295
146	0	1	M	1	36.672	95.2774	183.776	2.18296	1173.56	464.336	2072.82	28.2106	371.097	47.595	42.4778	0.809792	0	77.6677	123.408	0.949291	1	0.0489883
147	0	1	M	1	22.5673	80.7481	180.373	2.00734	1249.19	246.794	1603.99	24.8193	377.64	40.7297	44.907	0.718592	0	72.0402	139.363	1.07202	1	0.0529972
148	0	1	F	0	18.3491	52.7367	154.654	1.49814	1145.91	175.199	1182.91	22.0491	300.348	34.5088	48.3192	0.706603	0	57.8581	133.707	1.11422	1	0.0813946
149	0	1	M	1	23.0069	62.2592	163.416	1.67318	1363.08	254.892	1312.3	23.3138	312.72	46.1135	43.585	0.736713	0	82.2417	112.5	0.865383	1	0.0604298
150	0	1	M	1	30.3099	67.4165	171.951	1.79581	1252.12	282.299	1688.86	22.8012	312.137	44.22	48.544	1.0237	0	72.5046	120.706	0.92851	1	0.053838
151	0	1	F	0	26.35	60.7255	164.968	1.66691	1207.27	287.626	1735.76	22.3138	293.693	42.0731	54.0472	0.729013	0	56.4441	132.51	1.10425	1	0.111618
152	0	1	M	1	23.8236	93.4613	184.371	2.17026	1417.54	415.884	1708.37	27.4946	400.758	42.3751	50.549	0.596447	0	75.4837	140.866	1.08359	1	0.0513857
153	0	1	M	1	25.2225	86.442	173.462	2.00862	1218.58	250.479	1616.34	28.7287	355.258	41.0015	45.989	0.978391	0	73.8789	142.097	1.09305	1	0.0543029
154	0	1	F	0	29.0254	52.1801	156.546	1.5046	1071.59	304.404	1240.86	21.2923	262.68	40.1462	51.4485	0.479566	0	62.7755	110.754	0.922947	1	0.0551975
155	0	1	M	1	25.7736	69.0587	177.303	1.85504	1458.54	299.197	1476.5	21.9679	327.481	39.7161	47.4325	0.758332	0	67.1635	134.561	1.03509	1	0.0858886
156	0	1	M	1	36.5005	117.031	175.58	2.30483	1441.24	240.357	1887.53	37.9622	392.051	39.2925	45.1578	0.618132	0	91.7525	121.732	0.936399	1	0.0531157
157	0	1	M	1	25.4853	69.7219	177.49	1.86402	1304.42	382.088	1217.55	22.132	329.388	45.3249	55.6134	0.617853	0	89.0772	102.196	0.786126	1	0.052016
158	0	1	M	1	40.047	76.109	178.706	1.94437	1328.32	316.761	1381.43	23.8317	326.599	43.6875	50.7143	0.898524	0	73.7269	112.784	0.867572	1	0.0634494
159	0	1	M	1	25.1268	106.039	175.947	2.21356	1381.1	312.474	2038.11	34.2534	391.631	44.6918	52.1801	0.893964	0	71.8362	162.807	1.25236	1	0.0553509
160	0	1	M	1	21.947	76.5728	172.313	1.89858	1212.34	419.86	1837.85	25.7893	360.51	39.81	39.1276	0.968587	0	70.1687	144.212	1.10932	1	0.0649471
161	0	1	F	0	20.0805	69.0094	160.461	1.72502	1541.31	189.801	1353.21	26.8023	336.913	36.6768	40.3942	0.701011	0	68.3662	126.766	1.05638	1	0.050432
162	0	1	M	1	28.2621	70.4034	182.556	1.91032	1207.58	286.083	1618.45	21.1253	334.387	40.0225	49.5571	0.690202	0	61.2005	143.007	1.10005	1	0.101854
163	0	1	M	1	33.3633	81.1379	176.526	1.98026	1553.97	560.81	2096.17	26.0379	340.569	38.6403	49.6466	0.578382	0	87.9855	105.54	0.811848	1	0.0509958
164	0	1	M	1	21.0378	73.568	172.826	1.87058	1263.04	458.083	1615.43	24.6303	360.091	40.4738	46.1975	1.15355	0	63.9142	155.577	1.19675	1	0.0499804
165	0	1	F	0	29.6022	60.1281	159.997	1.62352	941.432	177.396	1228.95	23.4883	282.879	42.2373	43.4788	0.669158	0	62.0952	118.95	0.99125	1	0.109687
166	0	1	M	1	31.7832	80.5558	179.151	1.99545	1363.15	293.565	1885.67	25.0992	345.073	38.4578	47.1099	0.734646	0	55.7768	166.463	1.28049	1	0.0528077
167	0	1	M	1	24.1969	79.9781	169.39	1.91017	1389.04	429.586	1660.84	27.8737	350.804	42.6317	49.1388	0.693315	0	60.8329	169.395	1.30304	1	0.0547082
168	0	1	F	0	27.4923	71.8708	170.718	1.83571	1055.15	366.855	1659.15	24.6599	322.176	36.859	45.8987	0.439088	0	46.0572	172.772	1.43977	1	0.0540733
169	0	1	M	1	26.4955	84.9832	172.357	1.98493	1364.96	349.045	1515.21	28.6072	349.551	43.2431	46.67	0.705607	0	88.247	117.037	0.900286	1	0.0489972
170	0	1	F	0	41.6627	66.5782	171.194	1.78058	1225.87	261.01	1169.6	22.7172	297.361	40.0351	48.9475	0.598454	0	46.9325	141.532	1.17944	1	0.0519075
171	0	1	M	1	31.3694	75.6021	179.705	1.9467	1344.9	275.271	1228.84	23.4106	337.127	43.1436	50.0528	0.664464	0	66.6853	134.455	1.03427	1	0.0548021
172	0	1	F	0	23.9945	72.7968	175.927	1.88638	1344.25	401.661	1582.6	23.5206	347.464	37.6575	47.8148	0.53881	0	55.1838	146.551	1.22126	1	0.0539841
173	0	1	F	0	44.0743	52.003	154.047	1.485	1241.03	298.48	1363.06	21.914	245.85	35.645	42.8534	0.589233	0	58.2617	104.158	0.867986	1	0.0517378
174	0	1	M	1	21.1604	87.3469	177.352	2.05023	1359.68	331.568	1827.64	27.7699	393.945	44.3981	38.4081	0.938984	0	78.9245	136.338	1.04875	1	0.0771869
175	0	1	M	1	19.5513	85.0576	180.005	2.04916	1531.87	342.581	1740.48	26.2508	403.439	42.8715	45.796	1.11069	0	82.1097	129.41	0.995459	1	0.0555686
176	0	1	F	0	26.1799	85.0133	176.541	2.02005	1199.61	437.278	1938.62	27.277	356.118	37.9283	43.2668	0.758925	0	66.2618	130.594	1.08828	1	0.0596229
177	0	1	M	1	22.4832	64.1976	192.066	1.90574	1220.59	219.852	1955.42	17.4027	358.977	46.4092	43.1068	0.747732	0	69.4581	121.13	0.931772	1	0.0660107
178	0	1	M	1	22.2572	57.4676	167.963	1.64968	1322.81	325.846	1557.17	20.3703	311.796	44.6322	44.2631	0.805349	0	70.5504	123.56	0.950465	1	0.0523139
179	0	1	M	1	21.3184	94.2709	185.648	2.18916	1378.33	334.343	1647.27	27.3524	419.639	42.9122	42.52	0.676522	0	62.4446	173.944	1.33803	1	0.0897312
180	0	1	M	1	30.4057	73.8965	168.49	1.83992	1456.04	384.088	1531.4	26.0299	319.698	44.1596	42.8204	0.62311	0	67.5957	138.394	1.06457	1	0.0560338
181	0	1	M	1	24.0201	53.7341	164.524	1.57939	1377.28	216.368	1306.58	19.8515	290.807	43.9947	46.4665	1.01228	0	68.2958	122.793	0.944559	1	0.0611489
182	0	1	F	0	34.1811	55.2092	164.151	1.59504	1394.46	220.82	1310.35	20.4892	273.536	36.9517	40.5219	0.634368	0	47.6274	138.927	1.15772	1	0.0532255
183	0	1	M	1	24.71	66.359	156.231	1.66401	1396.55	346.052	1586.6	27.1873	303.318	42.8678	44.4195	1.01297	0	55.6721	175.518	1.35014	1	0.0509031
184	0	1	M	1	21.1915	97.9119	180.956	2.1838	1400.1	419.333	2007.63	29.9012	419.412	42.8037	41.3189	0.934636	0	90.3674	125.28	0.96369	1	0.0511659
185	0	1	M	1	25.2864	64.0816	173.865	1.77167	1448.98	376.363	1698.12	21.1987	313.28	43.896	54.4863	0.907273	0	74.4237	118.489	0.911452	1	0.0538154
186	0	1	M	1	30.0531	72.5914	176.394	1.88775	1674.75	279.736	1873.72	23.3301	328.408	46.9474	58.2203	0.487339	0	64.9745	138.294	1.0638	1	0.0499859
187	0	1	F	0	23.0291	84.1926	160.009	1.87332	1563.33	504.149	1584.99	32.884	350.012	30.6754	37.4789	0.737499	0	40.4016	235.062	1.95885	1	0.0684243
188	0	1	M	1	20.2416	69.5326	186.846	1.93251	1559.64	205.029	1771.1	19.917	376.519	44.6198	43.5782	0.81888	0	63.6489	143.881	1.10678	1	0.0535416
189	0	1	M	1	26.8723	97.7106	184.05	2.20886	1284.98	583.877	1818.48	28.8451	388.488	43.3673	51.4316	0.777822	0	82.395	129.081	0.992931	1	0.0889429
190	0	1	M	1	37.7392	61.4414	168.444	1.70076	1505.51	284.697	1097.39	21.6545	288.035	44.2894	49.3025	0.680266	0	55.076	142.556	1.09659	1	0.0543625
191	0	1	M	1	30.6364	81.7019	189.88	2.09393	1354.36	225.683	1977.31	22.6607	363.545	41.627	51.7918	0.800053	0	79.4402	114.163	0.878174	1	0.0533119
192	0	1	M	1	32.7249	99.9121	187.532	2.26039	1305.49	490.952	2054.88	28.4097	389.613	42.8043	54.0208	0.653769	0	80.8893	124.584	0.958341	1	0.0521976
193	0	1	F	0	33.9913	66.1017	146.815	1.58806	1100.07	239.578	1569	30.6669	272.519	39.0635	45.3474	0.490167	0	87.6191	90.9766	0.758138	1	0.0530245
194	0	1	M	1	19.2122	69.1123	158.359	1.70969	1394.16	330.961	1567.09	27.5595	338.334	39.0641	45.0535	0.726989	0	73.3026	141.567	1.08898	1	0.0505726
195	0	1	M	1	21.4271	60.7822	173.038	1.72633	1432.04	236.133	1644.9	20.2998	330.377	43.2996	57.2861	0.41498	0	81.8762	108.368	0.8336	1	0.0590243
196	0	1	F	0	30.8242	72.2817	165.936	1.80264	1200.35	181.614	1577.82	26.2512	312.768	37.7892	45.7589	0.768993	0	47.3811	166.909	1.39091	1	0.0444252
197	0	1	F	0	33.0239	61.6872	166.682	1.6907	885.542	243.949	1385.37	22.2034	291.115	33.7927	36.5598	0.908967	0	59.9995	117.519	0.979322	1	0.107385
198	0	1	F	0	21.2224	83.9062	163.616	1.90109	1215.19	344.678	1619.7	31.3431	364.946	38.146	44.8901	0.649574	0	48.1815	196.556	1.63797	1	0.0444112
199	0	1	M	1	23.1566	65.1233	179.762	1.82751	1425.77	393.599	1315.18	20.153	340.807	43.6034	54.7835	0.897669	0	90.8761	97.376	0.749046	1	0.047322
200	0	1	F	0	31.3479	73.0238	156.91	1.73854	1333.76	159.231	1524.58	29.6596	301.1	35.9326	53.6747	0.713889	0	56.9394	144.792	1.2066	1	0.0466602

## Sheet: Substrate Clearance Values
Statistics
		CL	CLh	CLr	CLmr	CLadd		CLb	CLh,b	CLr,b	CLmr,b	CLAdd,b
Mean		99.8396	64.3828	0	35.4568	0		79.7486	51.3788	0	28.3698	0
Median		99.2493	64.6936	0	34.4419	0		79.8203	51.0639	0	27.526	0
Geometric Mean		95.8339	61.7419	n/a	31.0426	n/a		76.7122	49.4225	n/a	24.8487	n/a
90% confidence interval around the geometric mean(lower limit)		92.5109	59.608	n/a	28.9707	n/a		74.1027	47.769	n/a	23.1861	n/a
90% confidence interval around the geometric mean(upper limit)		99.2763	63.9521	n/a	33.2627	n/a		79.4135	51.1332	n/a	26.6305	n/a
5th centile		58.4784	37.6228	0	11.0551	0		47.0798	30.0172	0	8.53406	0
95th centile		146.115	95.3952	0	61.3854	0		112.159	75.8623	0	48.359	0
Skewness		0.0445976	0.208585	n/a	0.248003	n/a		-0.0700879	0.0649499	n/a	0.155602	n/a
cv		0.2681	0.277247	n/a	0.441969	n/a		0.257915	0.264194	n/a	0.436523	n/a
Min Val		27.8189	20.0463	0	1.96259	0		21.1951	15.2732	0	1.55671	0
Max Val		170.403	114.718	0	78.6732	0		144.739	87.548	0	59.6469	0
Fold		6.12542	5.72264	n/a	40.0864	n/a		6.82891	5.73214	n/a	38.3161	n/a
Std Dev		26.767	17.85	0	15.6708	0		20.5683	13.574	0	12.384	0
		Plasma						Blood
Index	Trial	CL	CLh	CLr	CLmr	CLadd		CLb	CLh,b	CLr,b	CLmr,b	CLAdd,b
1	1	101.986	72.8628	0	29.1229	0		80.3601	57.4126	0	22.9475	0
2	1	89.839	70.7927	0	19.0463	0		67.9899	53.5758	0	14.4142	0
3	1	170.289	101.457	0	68.8319	0		132.386	78.8749	0	53.5116	0
4	1	112.615	76.2884	0	36.327	0		87.392	59.2015	0	28.1906	0
5	1	93.3987	44.119	0	49.2798	0		77.9855	36.8382	0	41.1473	0
6	1	72.2556	55.8609	0	16.3947	0		56.3188	43.5401	0	12.7787	0
7	1	80.5472	72.0059	0	8.54135	0		66.5986	59.5364	0	7.06221	0
8	1	94.6635	67.5629	0	27.1006	0		76.118	54.3267	0	21.7913	0
9	1	132.367	71.9156	0	60.4513	0		109.374	59.4237	0	49.9508	0
10	1	72.4716	42.6081	0	29.8636	0		62.9613	37.0167	0	25.9446	0
11	1	64.2317	58.7742	0	5.45754	0		50.3657	46.0863	0	4.27939	0
12	1	137.655	76.2741	0	61.3814	0		105.739	58.5894	0	47.1496	0
13	1	89.8355	51.4707	0	38.3648	0		74.7547	42.8302	0	31.9244	0
14	1	120.163	81.1514	0	39.0121	0		101.238	68.3701	0	32.8677	0
15	1	111.588	80.0201	0	31.5683	0		83.5177	59.8906	0	23.6271	0
16	1	116.525	78.4409	0	38.0843	0		91.0452	61.2886	0	29.7566	0
17	1	135.631	91.755	0	43.8765	0		112.131	75.8569	0	36.2742	0
18	1	110.502	59.4552	0	51.0464	0		91.2203	49.0809	0	42.1393	0
19	1	98.5802	78.9412	0	19.639	0		80.8518	64.7447	0	16.1072	0
20	1	121.618	94.685	0	26.9329	0		92.9837	72.392	0	20.5917	0
21	1	71.9993	57.8489	0	14.1503	0		60.68	48.7543	0	11.9257	0
22	1	66.7771	58.893	0	7.88403	0		50.2271	44.297	0	5.93006	0
23	1	87.2083	57.9294	0	29.2789	0		79.3315	52.6971	0	26.6344	0
24	1	100.85	51.6732	0	49.1771	0		81.6645	41.8429	0	39.8216	0
25	1	98.2053	68.9397	0	29.2656	0		74.9337	52.6032	0	22.3306	0
26	1	86.2043	67.8643	0	18.34	0		68.0956	53.6082	0	14.4874	0
27	1	71.7442	50.6647	0	21.0795	0		55.1567	38.9508	0	16.2059	0
28	1	128.885	71.1025	0	57.7824	0		105.439	58.1678	0	47.2708	0
29	1	94.2952	53.524	0	40.7712	0		76.045	43.1648	0	32.8802	0
30	1	137.977	78.2445	0	59.7321	0		97.5797	55.336	0	42.2437	0
31	1	116.944	88.824	0	28.1195	0		94.783	71.9921	0	22.7909	0
32	1	83.896	46.1374	0	37.7586	0		73.4121	40.3719	0	33.0402	0
33	1	67.3556	53.742	0	13.6137	0		58.5319	46.7016	0	11.8302	0
34	1	150.049	111.96	0	38.0888	0		110.016	82.0896	0	27.9268	0
35	1	127.273	73.3879	0	53.8852	0		105.458	60.8091	0	44.6492	0
36	1	86.1474	44.3165	0	41.8308	0		73.9867	38.0608	0	35.9259	0
37	1	111.427	72.7378	0	38.6891	0		86.5544	56.5014	0	30.053	0
38	1	61.823	37.8617	0	23.9613	0		49.0054	30.012	0	18.9935	0
39	1	35.3474	27.2105	0	8.13693	0		25.7815	19.8466	0	5.93488	0
40	1	117.978	59.9856	0	57.9926	0		93.3897	47.4837	0	45.906	0
41	1	107.251	65.4753	0	41.7756	0		81.6654	49.8557	0	31.8097	0
42	1	116.55	83.665	0	32.8847	0		97.5677	70.0388	0	27.5289	0
43	1	93.4496	59.09	0	34.3595	0		79.4067	50.2104	0	29.1962	0
44	1	127.38	77.7062	0	49.674	0		98.7728	60.2547	0	38.5181	0
45	1	94.5772	77.6125	0	16.9647	0		76.1375	62.4804	0	13.6571	0
46	1	109.556	75.0318	0	34.5243	0		84.9586	58.1857	0	26.7729	0
47	1	81.5453	53.7378	0	27.8075	0		67.5667	44.5259	0	23.0407	0
48	1	116.306	68.0042	0	48.302	0		85.4006	49.9337	0	35.4669	0
49	1	97.3569	70.289	0	27.0679	0		72.8353	52.5851	0	20.2502	0
50	1	123.811	67.5436	0	56.2675	0		97.007	52.9209	0	44.086	0
51	1	58.6214	45.4009	0	13.2205	0		47.5918	36.8587	0	10.7331	0
52	1	128.355	91.5643	0	36.7907	0		100	71.337	0	28.6634	0
53	1	105.937	63.578	0	42.3591	0		93.7253	56.2491	0	37.4762	0
54	1	82.6988	58.3907	0	24.3082	0		65.1065	45.9693	0	19.1371	0
55	1	53.9898	52.0273	0	1.96259	0		42.8241	41.2674	0	1.55671	0
56	1	55.7624	36.5284	0	19.234	0		47.1479	30.8853	0	16.2626	0
57	1	128.171	72.1149	0	56.0558	0		98.6613	55.5116	0	43.1498	0
58	1	108.154	62.4202	0	45.734	0		92.1686	53.1943	0	38.9743	0
59	1	109.342	64.1464	0	45.196	0		87.0891	51.0914	0	35.9978	0
60	1	170.403	103.071	0	67.3318	0		144.739	87.548	0	57.1913	0
61	1	96.8175	52.7855	0	44.032	0		76.0781	41.4783	0	34.5998	0
62	1	105.98	59.7328	0	46.247	0		85.7984	48.3581	0	37.4404	0
63	1	76.9387	51.5293	0	25.4093	0		62.2859	41.7157	0	20.5702	0
64	1	84.1616	55.2051	0	28.9565	0		65.732	43.1164	0	22.6156	0
65	1	92.1382	67.8642	0	24.274	0		78.4936	57.8143	0	20.6793	0
66	1	94.4849	51.9677	0	42.5171	0		82.1062	45.1594	0	36.9469	0
67	1	94.0555	70.811	0	23.2446	0		80.8715	60.8852	0	19.9863	0
68	1	99.5922	64.9126	0	34.6797	0		72.4447	47.2183	0	25.2265	0
69	1	29.3504	25.9558	0	3.3946	0		22.9296	20.2776	0	2.65199	0
70	1	111.929	76.8217	0	35.1069	0		95.5503	65.5805	0	29.9698	0
71	1	91.852	68.0431	0	23.8088	0		71.1096	52.6774	0	18.4322	0
72	1	80.8765	33.569	0	47.3075	0		69.7892	28.967	0	40.8222	0
73	1	82.5632	49.6768	0	32.8864	0		68.816	41.4054	0	27.4106	0
74	1	73.6896	55.7979	0	17.8917	0		66.1234	50.0688	0	16.0546	0
75	1	111.035	89.8441	0	21.1909	0		84.5692	68.4293	0	16.1399	0
76	1	104.854	74.1881	0	30.6661	0		89.6784	63.4507	0	26.2277	0
77	1	109.472	73.1865	0	36.2856	0		84.9958	56.8231	0	28.1727	0
78	1	126.893	66.6165	0	60.2762	0		97.2155	51.0365	0	46.179	0
79	1	136.986	83.2866	0	53.6994	0		105.594	64.2007	0	41.3937	0
80	1	35.2062	20.195	0	15.0113	0		31.1263	17.8547	0	13.2717	0
81	1	127.407	82.0983	0	45.3092	0		102.023	65.7409	0	36.2817	0
82	1	96.4408	55.7964	0	40.6444	0		69.8461	40.4099	0	29.4362	0
83	1	77.2459	24.9188	0	52.3271	0		63.5826	20.5111	0	43.0715	0
84	1	131.709	107.283	0	24.4258	0		97.7889	79.6537	0	18.1352	0
85	1	104.375	56.044	0	48.331	0		85.1127	45.7012	0	39.4116	0
86	1	146.102	96.5983	0	49.5038	0		117.156	77.46	0	39.696	0
87	1	80.1137	62.0862	0	18.0275	0		59.7134	46.2764	0	13.4369	0
88	1	104.707	63.2513	0	41.4557	0		73.6595	44.4962	0	29.1633	0
89	1	73.4588	42.109	0	31.3498	0		63.052	36.1434	0	26.9085	0
90	1	99.4899	73.8045	0	25.6854	0		84.5304	62.7071	0	21.8233	0
91	1	95.0007	59.3346	0	35.6661	0		73.6771	46.0165	0	27.6606	0
92	1	81.456	59.5933	0	21.8627	0		64.7812	47.394	0	17.3872	0
93	1	96.5707	58.6452	0	37.9255	0		79.0813	48.0243	0	31.057	0
94	1	110.586	47.37	0	63.216	0		84.0401	35.999	0	48.0411	0
95	1	77.8491	53.9519	0	23.8971	0		63.4213	43.953	0	19.4683	0
96	1	109.594	76.6992	0	32.8947	0		84.5157	59.1482	0	25.3674	0
97	1	91.8644	63.1487	0	28.7157	0		75.2194	51.7067	0	23.5127	0
98	1	69.5678	44.5841	0	24.9837	0		61.3901	39.3432	0	22.0469	0
99	1	121.135	67.0658	0	54.0688	0		92.1188	51.0013	0	41.1175	0
100	1	94.6822	61.7485	0	32.9337	0		76.0602	49.6039	0	26.4563	0
101	1	105.95	78.1157	0	27.8347	0		81.8511	60.3476	0	21.5035	0
102	1	151.337	102.306	0	49.0307	0		117.433	79.3866	0	38.0465	0
103	1	92.2744	52.3123	0	39.9621	0		75.5723	42.8435	0	32.7288	0
104	1	134.95	79.1324	0	55.8176	0		107.567	63.0756	0	44.4916	0
105	1	74.7526	55.0916	0	19.661	0		60.8251	44.8272	0	15.9979	0
106	1	69.1253	49.456	0	19.6693	0		56.3725	40.3319	0	16.0406	0
107	1	113.944	64.8567	0	49.0877	0		82.872	47.1704	0	35.7016	0
108	1	81.7172	47.8475	0	33.8697	0		67.5055	39.5262	0	27.9793	0
109	1	142.083	95.3319	0	46.7512	0		115.016	77.1709	0	37.8449	0
110	1	50.078	45.9913	0	4.08672	0		40.0733	36.8031	0	3.27027	0
111	1	109.281	90.8604	0	18.421	0		84.7192	70.4385	0	14.2807	0
112	1	122.395	71.1509	0	51.2443	0		103.719	60.2937	0	43.4248	0
113	1	72.7791	44.2314	0	28.5477	0		57.3844	34.8753	0	22.5091	0
114	1	96.5194	69.0712	0	27.4482	0		79.4548	56.8594	0	22.5954	0
115	1	62.6232	39.3949	0	23.2283	0		51.1549	32.1805	0	18.9744	0
116	1	148.468	88.5617	0	59.9062	0		109.411	65.2643	0	44.147	0
117	1	27.8189	20.0463	0	7.77262	0		21.1951	15.2732	0	5.92191	0
118	1	68.6609	42.9315	0	25.7294	0		57.087	35.6947	0	21.3923	0
119	1	124.724	81.0552	0	43.6685	0		99.3156	64.543	0	34.7725	0
120	1	120.487	99.5774	0	20.9091	0		89.5625	74.0199	0	15.5426	0
121	1	89.9734	60.1382	0	29.8352	0		72.8443	48.6891	0	24.1552	0
122	1	126.193	77.3299	0	48.8634	0		105.699	64.771	0	40.9276	0
123	1	126.62	64.5304	0	62.0898	0		102.209	52.0895	0	50.1193	0
124	1	116.372	69.2375	0	47.1341	0		98.7983	58.7819	0	40.0163	0
125	1	102.272	58.7972	0	43.4749	0		88.0289	50.6086	0	37.4203	0
126	1	85.617	55.8664	0	29.7505	0		66.7703	43.5687	0	23.2016	0
127	1	91.2281	50.7673	0	40.4607	0		70.1139	39.0176	0	31.0963	0
128	1	46.8254	42.6521	0	4.17334	0		40.6023	36.9836	0	3.6187	0
129	1	95.9655	75.585	0	20.3806	0		78.8989	62.1429	0	16.7561	0
130	1	84.9919	45.8146	0	39.1773	0		71.9464	38.7825	0	33.1639	0
131	1	122.422	94.9888	0	27.4332	0		96.4764	74.8572	0	21.6191	0
132	1	100.794	41.7435	0	59.0509	0		81.7326	33.8492	0	47.8835	0
133	1	60.0652	40.0415	0	20.0238	0		49.9821	33.3197	0	16.6624	0
134	1	116.926	66.5293	0	50.3966	0		91.1868	51.8841	0	39.3027	0
135	1	74.8988	57.1914	0	17.7074	0		59.5236	45.4511	0	14.0725	0
136	1	102.635	63.3477	0	39.2874	0		82.4065	50.8624	0	31.5442	0
137	1	122.54	93.4692	0	29.0708	0		89.3087	68.1215	0	21.1871	0
138	1	85.9492	65.5098	0	20.4394	0		73.4668	55.9959	0	17.4709	0
139	1	74.6337	44.5206	0	30.1131	0		60.1996	35.9103	0	24.2892	0
140	1	101.822	75.3055	0	26.5164	0		86.0012	63.6048	0	22.3964	0
141	1	150.524	83.698	0	66.826	0		118.971	66.1534	0	52.818	0
142	1	123.289	80.0315	0	43.2574	0		102.696	66.6639	0	36.0322	0
143	1	136.169	84.3743	0	51.7947	0		95.6811	59.2868	0	36.3943	0
144	1	116.58	75.9989	0	40.5808	0		90.165	58.779	0	31.386	0
145	1	115.213	61.1886	0	54.0246	0		89.0423	47.2895	0	41.7528	0
146	1	133.581	100.082	0	33.4993	0		101.391	75.9641	0	25.4266	0
147	1	99.9925	36.4497	0	63.5428	0		78.2226	28.5141	0	49.7085	0
148	1	79.7062	67.2705	0	12.4357	0		64.8244	54.7105	0	10.1138	0
149	1	67.9567	56.7693	0	11.1874	0		52.3098	43.6983	0	8.61152	0
150	1	112.065	68.3997	0	43.6649	0		91.3628	55.7642	0	35.5986	0
151	1	80.213	48.6638	0	31.5491	0		69.0929	41.9175	0	27.1754	0
152	1	115.972	61.4713	0	54.5007	0		96.5548	51.1792	0	45.3756	0
153	1	90.7659	36.5787	0	54.1873	0		71.9158	28.9821	0	42.9338	0
154	1	81.5564	46.57	0	34.9864	0		68.5187	39.1253	0	29.3934	0
155	1	109.391	71.4844	0	37.9061	0		88.1047	57.5746	0	30.5301	0
156	1	162.303	87.6748	0	74.6282	0		127.348	68.7922	0	58.5554	0
157	1	80.9359	46.8728	0	34.063	0		70.7155	40.9539	0	29.7616	0
158	1	120.265	82.118	0	38.1466	0		100.297	68.4839	0	31.8131	0
159	1	99.1235	70.5695	0	28.5541	0		83.8793	59.7166	0	24.1627	0
160	1	131.796	70.3347	0	61.461	0		95.5733	51.0041	0	44.5692	0
161	1	108.621	76.8891	0	31.7322	0		80.1858	56.7606	0	23.4251	0
162	1	74.2757	50.6264	0	23.6493	0		61.2096	41.7205	0	19.4891	0
163	1	105.254	52.0268	0	53.2268	0		86.8192	42.9147	0	43.9045	0
164	1	99.375	70.579	0	28.796	0		78.927	56.0563	0	22.8708	0
165	1	87.8796	65.1377	0	22.742	0		67.5559	50.0734	0	17.4825	0
166	1	86.9563	66.9266	0	20.0297	0		69.7839	53.7098	0	16.0742	0
167	1	80.7062	42.2029	0	38.5032	0		66.2165	34.626	0	31.5905	0
168	1	111.334	69.0954	0	42.2389	0		88.1202	54.6885	0	33.4317	0
169	1	103.119	68.2813	0	34.8373	0		82.3444	54.5254	0	27.819	0
170	1	75.0943	44.6324	0	30.4619	0		61.4872	36.545	0	24.9422	0
171	1	103.149	58.1725	0	44.9769	0		85.4432	48.1868	0	37.2563	0
172	1	88.0298	56.2138	0	31.816	0		71.2008	45.4672	0	25.7336	0
173	1	96.8253	63.9175	0	32.9078	0		73.8471	48.7489	0	25.0982	0
174	1	157.038	78.3643	0	78.6732	0		112.691	56.2347	0	56.4564	0
175	1	120.925	76.6343	0	44.2908	0		95.5968	60.5829	0	35.0139	0
176	1	85.427	72.0489	0	13.3781	0		65.496	55.2391	0	10.2569	0
177	1	37.4991	33.8567	0	3.64236	0		28.6922	25.9053	0	2.78693	0
178	1	106.947	66.2754	0	40.6715	0		83.0141	51.4441	0	31.5699	0
179	1	146.362	67.8209	0	78.5414	0		111.152	51.5054	0	59.6469	0
180	1	82.7726	68.1021	0	14.6705	0		63.1028	51.9185	0	11.1843	0
181	1	55.3648	37.6778	0	17.6871	0		44.1086	30.0175	0	14.0911	0
182	1	61.9121	46.0319	0	15.8802	0		45.7848	34.0412	0	11.7436	0
183	1	95.2409	59.8504	0	35.3904	0		74.0687	46.5456	0	27.5231	0
184	1	103.063	83.0558	0	20.0067	0		77.0441	62.0881	0	14.956	0
185	1	114.125	59.4616	0	54.6637	0		98.7028	51.4262	0	47.2767	0
186	1	102.433	65.8442	0	36.5887	0		91.5334	58.838	0	32.6955	0
187	1	169.247	114.718	0	54.5294	0		119.775	81.1851	0	38.5901	0
188	1	127.843	100.772	0	27.0708	0		98.3988	77.5627	0	20.836	0
189	1	144.864	87.3779	0	57.4858	0		121.685	73.3972	0	48.288	0
190	1	123.966	80.4287	0	43.5371	0		101.886	66.1031	0	35.7825	0
191	1	96.0295	68.2878	0	27.7418	0		80.9526	57.5664	0	23.3862	0
192	1	90.5845	52.6452	0	37.9393	0		78.0074	45.3358	0	32.6717	0
193	1	73.6065	44.1028	0	29.5037	0		57.8837	34.6822	0	23.2015	0
194	1	79.5937	45.7716	0	33.8221	0		62.374	35.8692	0	26.5049	0
195	1	70.3874	44.621	0	25.7664	0		62.4033	39.5596	0	22.8437	0
196	1	114.399	90.0633	0	24.3361	0		90.3988	71.1684	0	19.2305	0
197	1	83.306	48.1152	0	35.1908	0		58.1235	33.5705	0	24.553	0
198	1	69.7229	40.5683	0	29.1546	0		54.5321	31.7295	0	22.8026	0
199	1	115.053	56.136	0	58.9167	0		99.7755	48.682	0	51.0935	0
200	1	86.8924	51.1384	0	35.754	0		74.5868	43.8962	0	30.6906	0

## Sheet: % fm and fe SS
		% fm and fe of CYPs, UGTs, cytosolic enzymes, esterases, additional metabolic clearances, biliary, renal and additional systemic clearances
		% contribution in absence of inhibitor(s)
Index	Trial	CYP2B6 Liver	CYP2C9 Liver	UGT1A9 Liver	UGT1A9 Kidney	Renal		Statistics	% contribution in absence of inhibitor(s)
1	1	37.21	2.24414	31.9901	28.5558	0			CYP2B6 Liver	CYP2C9 Liver	UGT1A9 Liver	UGT1A9 Kidney	Renal
2	1	62.8021	2.86415	13.1332	21.2005	0		Mean	33.3442	3.77798	28.258	34.6199	0
3	1	43.4965	2.17376	13.909	40.4207	0		Median	32.0633	2.83996	27.99	35.0492	0
4	1	34.9516	2.26958	30.5213	32.2576	0		Geometric Mean	25.9058	2.82407	23.8504	32.3921	n/a
5	1	7.73027	1.73825	37.7687	52.7628	0		90% confidence interval around the geometric mean(lower limit)	23.5176	2.57933	22.0169	30.8989	n/a
6	1	48.6722	5.45378	23.1841	22.6899	0		90% confidence interval around the geometric mean(upper limit)	28.5365	3.09203	25.8366	33.9574	n/a
7	1	57.1313	1.80096	30.4635	10.6041	0		5th centile	4.34011	0.679082	6.67106	16.4224	0
8	1	40.0525	7.16297	24.1562	28.6283	0		95th centile	68.6412	10.079	50.1712	50.1219	0
9	1	27.4964	2.48622	24.3478	45.6695	0		Skewness	0.392284	2.69861	0.160053	-0.157033	n/a
10	1	4.33301	7.08702	47.3727	41.2072	0		cv	0.587133	0.882093	0.48096	0.319599	n/a
11	1	84.0271	5.38116	2.0951	8.49664	0		Min Val	1.34787	0.240485	0.889281	3.63512	0
12	1	34.553	3.62132	17.2351	44.5906	0		Max Val	84.0271	23.553	63.5749	67.741	0
13	1	31.3983	2.32567	23.5704	42.7056	0		Fold	62.3405	97.9397	71.4902	18.6352	n/a
14	1	41.4564	3.63885	22.4389	32.4658	0		Std Dev	19.5774	3.33253	13.591	11.0645	0
15	1	37.3963	1.18576	33.128	28.29	0
16	1	50.4629	0.795956	16.0578	32.6833	0
17	1	62.0005	0.730926	4.91878	32.3498	0
18	1	14.396	5.37456	34.0343	46.1952	0
19	1	38.5477	1.66576	39.8647	19.9218	0
20	1	69.2921	0.425415	8.13695	22.1455	0
21	1	28.2789	3.44883	48.6188	19.6534	0
22	1	67.9483	12.7695	7.47571	11.8065	0
23	1	40.7208	3.30392	22.4017	33.5735	0
24	1	10.1694	4.01004	37.0582	48.7624	0
25	1	52.5342	2.27096	15.3944	29.8004	0
26	1	57.0261	2.74914	18.9497	21.2751	0
27	1	3.7116	8.8858	58.0211	29.3815	0
28	1	34.6963	1.75404	18.7171	44.8325	0
29	1	7.88723	6.12861	42.7464	43.2378	0
30	1	7.47717	2.67832	46.553	43.2915	0
31	1	64.1429	0.461165	11.3506	24.0453	0
32	1	4.34049	5.4274	45.2257	45.0064	0
33	1	28.6389	2.61269	48.5368	20.2116	0
34	1	37.851	1.28868	35.4761	25.3842	0
35	1	36.987	2.17509	18.4997	42.3382	0
36	1	7.01282	4.86481	39.5651	48.5573	0
37	1	20.5459	7.3725	37.3601	34.7215	0
38	1	27.2379	6.81558	27.1886	38.7579	0
39	1	49.8097	16.4413	10.7292	23.0199	0
40	1	29.6412	1.97463	19.2288	49.1553	0
41	1	23.0176	3.17138	34.8598	38.9513	0
42	1	38.4079	2.89611	30.4808	28.2152	0
43	1	41.7647	1.46664	20.0007	36.768	0
44	1	19.636	5.31065	36.0567	38.9967	0
45	1	52.8591	1.0514	28.1521	17.9374	0
46	1	31.3197	5.92589	31.2415	31.5129	0
47	1	3.54845	3.06962	59.2812	34.1007	0
48	1	25.4996	1.84553	31.1248	41.53	0
49	1	28.049	3.12723	41.021	27.8027	0
50	1	1.34787	3.36767	49.8382	45.4463	0
51	1	42.075	6.83574	28.5369	22.5524	0
52	1	42.8787	2.74902	25.709	28.6633	0
53	1	36.9235	3.61187	19.4794	39.9852	0
54	1	33.169	2.49503	34.9423	29.3936	0
55	1	75.1524	13.6105	7.60197	3.63512	0
56	1	12.2555	9.98228	43.2694	34.4928	0
57	1	25.0797	2.05222	29.1328	43.7352	0
58	1	25.4953	2.39985	29.819	42.2859	0
59	1	32.1628	3.43513	23.0677	41.3344	0
60	1	40.7922	0.802065	18.8924	39.5133	0
61	1	3.12486	1.90556	49.4902	45.4794	0
62	1	12.6554	4.77178	38.9352	43.6376	0
63	1	14.0447	7.32654	45.6033	33.0254	0
64	1	29.9229	1.64562	34.0256	34.4058	0
65	1	60.6574	1.74525	11.2521	26.3452	0
66	1	23.6083	3.40391	27.9889	44.9989	0
67	1	52.9783	3.95331	18.3547	24.7137	0
68	1	12.9922	2.75803	49.4281	34.8217	0
69	1	65.1427	11.9167	11.3748	11.5658	0
70	1	54.5967	1.30511	12.7327	31.3654	0
71	1	41.788	4.12206	28.1691	25.9209	0
72	1	8.41442	7.71461	25.3774	58.4935	0
73	1	33.2773	2.10309	24.7879	39.8318	0
74	1	49.236	4.57414	21.9101	24.2798	0
75	1	63.5584	2.67181	14.6849	19.0849	0
76	1	53.3093	5.46612	11.9782	29.2464	0
77	1	35.9748	0.482933	30.3962	33.146	0
78	1	10.6792	3.18814	38.6309	47.5017	0
79	1	44.5243	3.17591	13.0991	39.2006	0
80	1	35.6931	15.7468	5.92197	42.6381	0
81	1	33.0254	9.24444	22.1677	35.5624	0
82	1	12.2525	5.58757	40.0155	42.1444	0
83	1	8.4917	1.59996	22.1674	67.741	0
84	1	71.3375	0.490163	9.6271	18.5453	0
85	1	7.38933	1.31914	44.9864	46.3051	0
86	1	47.2421	2.69772	16.1771	33.883	0
87	1	24.7984	4.43633	48.2629	22.5024	0
88	1	9.35825	4.98837	46.0613	39.5921	0
89	1	36.739	2.67178	17.9125	42.6768	0
90	1	56.7359	1.12697	16.32	25.8171	0
91	1	34.5346	4.82515	23.0972	37.543	0
92	1	29.7467	3.50717	39.9062	26.8399	0
93	1	32.6338	4.95085	23.1431	39.2723	0
94	1	3.46941	4.09616	35.2699	57.1645	0
95	1	28.2892	1.96074	39.0533	30.6967	0
96	1	53.4378	2.62	13.9271	30.0151	0
97	1	36.0846	2.23677	30.4199	31.2588	0
98	1	42.3533	1.98094	19.753	35.9127	0
99	1	26.46	2.51807	26.3867	44.6353	0
100	1	12.3262	5.80456	47.0859	34.7834	0
101	1	58.8207	0.68911	14.2188	26.2715	0
102	1	56.7718	0.520493	10.3093	32.3985	0
103	1	32.1272	0.965076	23.5998	43.3079	0
104	1	23.0375	3.43502	32.1658	41.3617	0
105	1	40.2732	2.47696	30.9484	26.3014	0
106	1	28.0808	4.27052	39.1941	28.4546	0
107	1	13.4716	4.95363	38.4943	43.0804	0
108	1	30.5353	2.81577	25.2014	41.4475	0
109	1	59.428	0.976885	6.69098	32.9041	0
110	1	68.607	16.9398	6.29252	8.16071	0
111	1	57.2383	2.04877	23.8564	16.8565	0
112	1	41.3002	2.39923	14.4326	41.8679	0
113	1	15.9747	3.44784	41.3524	39.2251	0
114	1	55.4543	1.44665	14.6611	28.438	0
115	1	20.7581	3.01422	39.1356	37.0921	0
116	1	35.1375	2.03846	22.4744	40.3496	0
117	1	31.8948	23.553	16.6122	27.94	0
118	1	7.90197	2.89119	51.7337	37.4731	0
119	1	39.6734	0.681535	24.6329	35.0122	0
120	1	64.2808	1.1527	17.2126	17.3539	0
121	1	26.6749	6.02251	34.1426	33.16	0
122	1	44.7301	1.09391	15.455	38.7211	0
123	1	14.1329	5.09718	31.7337	49.0362	0
124	1	32.0727	1.54748	25.8768	40.5031	0
125	1	36.5157	3.36179	17.6134	42.5091	0
126	1	38.719	4.1531	22.3795	34.7484	0
127	1	26.1118	3.71797	25.8191	44.3512	0
128	1	81.5496	4.7413	4.79654	8.91254	0
129	1	75.5974	2.27599	0.889281	21.2374	0
130	1	23.9464	1.52891	28.4294	46.0953	0
131	1	73.2668	0.437286	3.88713	22.4087	0
132	1	3.64955	5.1375	32.6274	58.5855	0
133	1	8.04312	4.47931	54.1409	33.3367	0
134	1	23.3125	2.18173	31.4044	43.1013	0
135	1	5.46018	7.32313	63.5749	23.6418	0
136	1	2.26922	12.0802	47.3718	38.2787	0
137	1	40.2359	1.66323	34.3773	23.7235	0
138	1	29.8783	3.00279	43.3382	23.7807	0
139	1	7.17042	1.92873	50.553	40.3479	0
140	1	48.7666	5.53548	19.656	26.042	0
141	1	34.1718	0.5675	20.8651	44.3955	0
142	1	42.3018	2.08929	20.5227	35.0862	0
143	1	41.7101	2.59849	17.6543	38.0371	0
144	1	44.435	2.69609	18.0594	34.8095	0
145	1	18.8555	3.39277	30.8608	46.891	0
146	1	55.506	2.21044	17.2057	25.0778	0
147	1	1.68529	1.99262	32.7746	63.5475	0
148	1	53.0771	1.79105	29.5299	15.6019	0
149	1	11.6347	16.8746	55.0282	16.4625	0
150	1	27.7012	5.34369	27.9911	38.964	0
151	1	14.9875	3.22679	42.4539	39.3317	0
152	1	4.76733	4.5085	43.7295	46.9947	0
153	1	12.589	5.89483	21.8162	59.7	0
154	1	11.3157	2.39451	43.3914	42.8984	0
155	1	22.8079	1.98145	40.5586	34.6521	0
156	1	22.6592	1.57287	29.7871	45.9808	0
157	1	18.729	4.72815	34.4564	42.0865	0
158	1	59.9063	0.509976	7.86484	31.7189	0
159	1	14.4333	3.7646	52.9956	28.8065	0
160	1	12.7259	5.43465	35.2059	46.6335	0
161	1	48.3093	3.45105	19.0261	29.2136	0
162	1	36.6917	2.48614	28.9822	31.8399	0
163	1	24.3489	4.4379	20.6432	50.57	0
164	1	21.1175	3.63619	46.2692	28.9771	0
165	1	27.8043	3.71611	42.601	25.8785	0
166	1	36.2545	4.9809	35.7304	23.0342	0
167	1	17.4398	1.47309	33.3792	47.7079	0
168	1	27.4592	2.66985	31.9322	37.9388	0
169	1	26.4047	2.5237	37.2879	33.7837	0
170	1	23.1265	2.88547	33.4232	40.5648	0
171	1	27.8732	1.38819	27.135	43.6036	0
172	1	20.3618	1.49713	41.9988	36.1423	0
173	1	53.2416	3.22085	9.55076	33.9868	0
174	1	15.9295	2.04286	31.9293	50.0984	0
175	1	32.0539	3.83789	27.4816	36.6266	0
176	1	75.6758	5.33444	3.32951	15.6603	0
177	1	73.1721	9.93947	7.17521	9.71319	0
178	1	34.8474	2.47382	24.6491	38.0296	0
179	1	22.5566	1.89127	21.8898	53.6623	0
180	1	40.1676	5.45492	36.6536	17.7239	0
181	1	7.01111	4.42447	56.618	31.9464	0
182	1	21.4037	5.91659	47.0301	25.6496	0
183	1	31.893	1.82574	29.1224	37.1589	0
184	1	76.8373	2.04101	1.70954	19.4122	0
185	1	30.2449	2.93806	18.9191	47.898	0
186	1	35.8581	2.7667	25.6555	35.7197	0
187	1	58.902	0.240485	8.63876	32.2188	0
188	1	59.6963	0.968369	18.1602	21.1751	0
189	1	37.0784	1.16537	22.0736	39.6827	0
190	1	62.1665	0.632462	2.08076	35.1202	0
191	1	43.4393	0.909706	26.7622	28.8888	0
192	1	27.5088	1.96451	28.644	41.8828	0
193	1	11.6955	2.56886	45.6526	40.083	0
194	1	7.60664	5.02358	44.8764	42.4934	0
195	1	6.79348	3.06126	53.5387	36.6065	0
196	1	68.1098	1.21324	9.40406	21.2729	0
197	1	3.01092	13.0046	41.7416	42.2428	0
198	1	5.10485	2.92907	50.1511	41.815	0
199	1	23.4606	2.08781	23.2431	51.2084	0
200	1	28.9238	3.26747	26.6612	41.1474	0

## Sheet: Conc Profiles CSys(CPlasma)
Summary Statistics			Mean
	From (h)	To (h)	TMax (h)	CMax (µg/mL)	AUC (µg/mL.h)
CPlasma (µg/mL)	0	0.0166667	0.00438955	12.2037	0.127343
Population Statistics
Time (h)			0	0.00338955	0.00438955	0.00674869	0.00974869	0.0117487	0.0137487	0.0157487	0.0166667	0.0186667	0.0206667	0.0226667	0.0246667	0.0266667	0.0286667	0.0306667	0.0326667	0.0346667	0.0366667	0.0386667	0.0406667	0.0426667	0.0446667	0.0466667	0.0486667	0.0506667	0.0526667	0.0546667	0.0566667	0.0586667	0.0606667	0.0626667	0.0646667	0.0666667	0.0686667	0.0706667	0.0726667	0.0746667	0.0766667	0.0786667	0.0806667	0.0826667	0.0846667	0.0866667	0.0886667	0.0906667	0.0926667
CSys Mean (µg/mL)			0	9.35695	12.2037	11.3644	8.42592	6.96062	5.79585	4.86708	4.74708	4.34351	4.01763	3.7556	3.5434	3.3711	3.23081	3.11632	3.02263	2.94577	2.88256	2.83042	2.7873	2.75153	2.72178	2.69696	2.67619	2.65877	2.64411	2.63175	2.6213	2.61245	2.60495	2.59858	2.59318	2.58861	2.58474	2.58148	2.57875	2.57648	2.57462	2.57312	2.57194	2.57104	2.5704	2.56999	2.5698	2.56979	2.56996
CSys 95th percentile			0	11.9113	15.356	13.5381	9.94532	8.3787	6.96491	5.88985	5.74558	5.27952	4.90573	4.59409	4.32752	4.12005	3.95494	3.83181	3.72725	3.6257	3.54125	3.47074	3.41162	3.36184	3.31973	3.28392	3.25333	3.22707	3.20441	3.18475	3.16762	3.15263	3.13985	3.12841	3.11847	3.10967	3.10184	3.09487	3.08866	3.08311	3.07784	3.07416	3.07323	3.07262	3.07232	3.07229	3.07251	3.0687	3.06498
CSys 5th percentile			0	7.33358	9.59554	9.12202	6.85564	5.66092	4.64487	3.81667	3.7634	3.4118	3.14452	2.93451	2.77133	2.64305	2.5426	2.47048	2.40062	2.34043	2.29063	2.24886	2.2198	2.19727	2.18071	2.16587	2.15364	2.1435	2.13506	2.12852	2.12307	2.1185	2.11466	2.11144	2.10873	2.10647	2.10459	2.10305	2.1018	2.10317	2.10464	2.10467	2.10374	2.10277	2.10081	2.09909	2.09868	2.09897	2.09939
Individual Statistics
Type	Individual	Trial
Time (h)			0	0.00338955	0.00438955	0.00674869	0.00974869	0.0117487	0.0137487	0.0157487	0.0166667	0.0186667	0.0206667	0.0226667	0.0246667	0.0266667	0.0286667	0.0306667	0.0326667	0.0346667	0.0366667	0.0386667	0.0406667	0.0426667	0.0446667	0.0466667	0.0486667	0.0506667	0.0526667	0.0546667	0.0566667	0.0586667	0.0606667	0.0626667	0.0646667	0.0666667	0.0686667	0.0706667	0.0726667	0.0746667	0.0766667	0.0786667	0.0806667	0.0826667	0.0846667	0.0866667	0.0886667	0.0906667	0.0926667
CSys (µg/mL)	1	1	0	9.19518	11.4475	10.7978	8.47035	7.24289	6.224	5.37728	5.37728	4.95922	4.61356	4.32696	4.08874	3.89029	3.72462	3.58603	3.46986	3.3723	3.2902	3.22097	3.16247	3.11294	3.07091	3.03516	3.00468	2.97864	2.95634	2.9372	2.92073	2.90652	2.89424	2.88362	2.8744	2.86639	2.85942	2.85336	2.84809	2.8435	2.83951	2.83606	2.83307	2.8305	2.8283	2.82644	2.82488	2.8236	2.82256
CSys (µg/mL)	2	1	0	8.16747	10.2897	10.0987	7.57867	6.30986	5.29175	4.47204	4.47204	4.08565	3.77377	3.52091	3.31515	3.14721	3.00975	2.89694	2.80408	2.72744	2.66399	2.61128	2.56734	2.53058	2.49971	2.47367	2.45161	2.43284	2.41679	2.40301	2.39112	2.38081	2.37184	2.36399	2.35711	2.35104	2.34569	2.34094	2.33673	2.33299	2.32966	2.3267	2.32406	2.32172	2.31964	2.31781	2.3162	2.31479	2.31357
CSys (µg/mL)	3	1	0	8.11775	12.7229	11.595	9.05473	7.58761	6.39115	5.41248	4.60964	4.24922	3.96633	3.71978	3.51657	3.34893	3.21054	3.09622	3.0017	2.92351	2.85878	2.80515	2.76069	2.72382	2.6932	2.66777	2.64664	2.62907	2.61446	2.6023	2.59219	2.58378	2.57679	2.57099	2.56619	2.56223	2.55897	2.55631	2.55415	2.55243	2.55107	2.55003	2.54925	2.54872	2.54839	2.54824	2.54825	2.54839	2.54866
CSys (µg/mL)	4	1	0	9.72803	12.0917	11.2256	7.86964	6.27619	5.05474	4.11441	3.38666	3.14907	2.96245	2.81483	2.69759	2.6043	2.53	2.4708	2.42365	2.38609	2.3562	2.3324	2.31348	2.29843	2.28648	2.277	2.2695	2.26358	2.25893	2.2553	2.2525	2.25036	2.24876	2.24761	2.24683	2.24635	2.24612	2.24611	2.24627	2.24659	2.24704	2.24761	2.24828	2.24904	2.24989	2.2508	2.25179	2.25283	2.25393
CSys (µg/mL)	5	1	0	7.30286	11.9269	10.9649	8.29529	6.93257	5.82662	4.92619	4.92619	4.48608	4.12662	3.83224	3.5907	3.39228	3.22913	3.09488	2.98437	2.89337	2.81841	2.75668	2.70586	2.66402	2.62961	2.60134	2.57814	2.55914	2.54361	2.53097	2.52072	2.51245	2.50584	2.5006	2.49651	2.49337	2.49104	2.48938	2.48828	2.48766	2.48744	2.48756	2.48798	2.48864	2.48951	2.49057	2.49178	2.49313	2.49461
CSys (µg/mL)	6	1	0	10.6364	13.3448	12.6856	8.91489	7.1351	5.77418	4.7275	4.7275	4.28947	3.94841	3.68115	3.47082	3.30478	3.17338	3.06914	2.98626	2.92019	2.86737	2.82501	2.79091	2.76337	2.74103	2.72283	2.70794	2.6957	2.68559	2.67722	2.67026	2.66445	2.6596	2.65554	2.65216	2.64934	2.64702	2.64511	2.64357	2.64236	2.64144	2.64078	2.64035	2.64014	2.64012	2.64028	2.64062	2.64111	2.64174
CSys (µg/mL)	7	1	0	9.24186	11.6178	11.4158	8.65313	7.25423	6.12453	5.20854	5.20854	4.77119	4.4153	4.12481	3.88718	3.69236	3.53231	3.40054	3.29178	3.2018	3.12715	3.06505	3.01321	2.96981	2.93334	2.90259	2.87656	2.85444	2.83557	2.8194	2.80551	2.79353	2.78315	2.77413	2.76628	2.75943	2.75343	2.74818	2.74359	2.73956	2.73603	2.73296	2.73028	2.72797	2.72598	2.72429	2.72286	2.72169	2.72074
CSys (µg/mL)	8	1	0	7.54449	9.31014	8.54624	6.44136	5.37827	4.52241	3.83088	3.83088	3.50581	3.2425	3.02848	2.85405	2.71156	2.5949	2.49916	2.42041	2.35547	2.30175	2.2572	2.22013	2.18918	2.16325	2.14144	2.12302	2.1074	2.0941	2.08273	2.07297	2.06455	2.05727	2.05095	2.04544	2.04063	2.03641	2.03272	2.02947	2.02662	2.02412	2.02193	2.02002	2.01835	2.01692	2.01568	2.01463	2.01376	2.01304
CSys (µg/mL)	9	1	0	10.0253	12.3174	11.2206	8.37497	6.94743	5.805	4.88779	4.88779	4.45914	4.11432	3.83588	3.61033	3.4271	3.27781	3.15582	3.05581	2.97356	2.90565	2.84938	2.80254	2.76339	2.73051	2.70276	2.67922	2.65916	2.64196	2.62716	2.61434	2.60319	2.59346	2.58492	2.57741	2.57078	2.56491	2.5597	2.55508	2.55098	2.54734	2.54411	2.54125	2.53873	2.53651	2.53458	2.53291	2.53148	2.53027
CSys (µg/mL)	10	1	0	10.2732	12.8241	12.0217	8.93704	7.39055	6.15433	5.16309	5.16309	4.70334	4.33377	4.03541	3.79376	3.59758	3.43802	3.30807	3.20212	3.11568	3.0451	2.98745	2.94036	2.90188	2.87045	2.84479	2.82385	2.8068	2.79293	2.78169	2.77261	2.76532	2.7595	2.75491	2.75135	2.74863	2.74663	2.74524	2.74435	2.74389	2.74379	2.74402	2.74452	2.74525	2.74619	2.74731	2.7486	2.75002	2.75158
CSys (µg/mL)	11	1	0	8.80161	13.3402	11.1489	8.20537	6.7476	5.58783	4.66042	4.66042	4.22779	3.87869	3.5967	3.36891	3.18494	3.03644	2.91665	2.82011	2.74241	2.67996	2.62988	2.58982	2.55789	2.53255	2.51256	2.4969	2.48476	2.47548	2.46852	2.46345	2.45991	2.45762	2.45634	2.4559	2.45613	2.45691	2.45814	2.45975	2.46165	2.46381	2.46617	2.4687	2.47137	2.47415	2.47704	2.48	2.48304	2.48613
CSys (µg/mL)	12	1	0	7.42002	12.0164	10.8179	8.15446	6.80257	5.71089	4.82665	4.82665	4.40391	4.06084	3.78149	3.55344	3.36688	3.21399	3.08848	2.98527	2.90026	2.83012	2.77215	2.72416	2.68435	2.65126	2.6237	2.6007	2.58147	2.56535	2.55182	2.54043	2.53084	2.52274	2.51591	2.51013	2.50524	2.50112	2.49765	2.49473	2.4923	2.49029	2.48864	2.48731	2.48626	2.48547	2.48491	2.48454	2.48436	2.48435
CSys (µg/mL)	13	1	0	10.5907	13.1904	12.1961	8.47401	6.72737	5.3946	4.37129	4.37129	3.94538	3.61343	3.354	3.15098	2.99196	2.86728	2.76943	2.69254	2.63202	2.5843	2.54661	2.51676	2.49306	2.4742	2.45914	2.44709	2.4374	2.4296	2.4233	2.4182	2.41407	2.41072	2.40801	2.40583	2.40408	2.4027	2.40163	2.40082	2.40024	2.39986	2.39965	2.39961	2.39971	2.39993	2.40027	2.40072	2.40128	2.40192
CSys (µg/mL)	14	1	0	8.81433	11.0599	10.7539	8.41592	7.19118	6.17747	5.33638	5.33638	4.9211	4.5771	4.2915	4.05395	3.856	3.69076	3.55259	3.43681	3.3396	3.25781	3.18884	3.13054	3.08114	3.03916	3.0034	2.97286	2.94669	2.9242	2.90484	2.8881	2.87361	2.86103	2.85007	2.84052	2.83218	2.82488	2.8185	2.8129	2.80801	2.80374	2.80001	2.79677	2.79396	2.79155	2.78949	2.78776	2.78632	2.78515
CSys (µg/mL)	15	1	0	10.143	12.5053	11.2608	7.94825	6.3633	5.14247	4.19903	4.19903	3.79835	3.48727	3.24412	3.05301	2.90212	2.78257	2.68755	2.61187	2.55146	2.50316	2.46448	2.43347	2.40856	2.38855	2.37243	2.35945	2.34898	2.34054	2.33371	2.32821	2.32377	2.3202	2.31733	2.31504	2.31323	2.31181	2.31072	2.30991	2.30933	2.30895	2.30874	2.30868	2.30875	2.30893	2.30922	2.3096	2.31006	2.31059
CSys (µg/mL)	16	1	0	9.31355	11.6283	11.0174	8.31455	6.93704	5.82152	4.91552	4.91552	4.48017	4.1256	3.83573	3.59811	3.40294	3.24242	3.11026	3.00141	2.91172	2.83782	2.77694	2.72682	2.6856	2.65172	2.62392	2.60116	2.58257	2.56744	2.55517	2.54528	2.53737	2.53109	2.52618	2.52239	2.51955	2.5175	2.5161	2.51525	2.51485	2.51484	2.51515	2.51573	2.51654	2.51754	2.5187	2.52	2.52142	2.52294
CSys (µg/mL)	17	1	0	9.27209	11.4813	10.6905	8.20516	6.92273	5.87317	5.01163	5.01163	4.5912	4.2456	3.96079	3.72563	3.53114	3.37007	3.23647	3.12551	3.0332	2.95631	2.89215	2.83853	2.79364	2.75598	2.72433	2.69767	2.67517	2.65614	2.64	2.62627	2.61458	2.6046	2.59604	2.5887	2.58239	2.57694	2.57224	2.56818	2.56466	2.56162	2.55898	2.55671	2.55474	2.55305	2.55161	2.55038	2.54935	2.54849
CSys (µg/mL)	18	1	0	11.9474	14.8776	13.3847	8.81783	6.77808	5.2765	4.16243	4.16243	3.75641	3.44752	3.21237	3.03358	2.89785	2.79493	2.71696	2.65796	2.61334	2.57963	2.5542	2.53506	2.52069	2.50994	2.50197	2.49611	2.49187	2.48887	2.48684	2.48556	2.48486	2.48463	2.48476	2.48519	2.48587	2.48674	2.48778	2.48897	2.49027	2.49169	2.49319	2.49479	2.49646	2.4982	2.5	2.50187	2.50379	2.50576
CSys (µg/mL)	19	1	0	12.9019	15.9176	14.3885	9.74664	7.6135	6.02051	4.82573	3.9244	3.67526	3.48344	3.33408	3.21696	3.12475	3.05199	2.99452	2.94912	2.91324	2.88489	2.86249	2.84478	2.83079	2.81972	2.81099	2.80409	2.79865	2.79437	2.79103	2.78843	2.78644	2.78495	2.78385	2.78309	2.78261	2.78237	2.78233	2.78246	2.78274	2.78315	2.78368	2.78432	2.78505	2.78587	2.78678	2.78775	2.7888	2.78991
CSys (µg/mL)	20	1	0	8.95967	11.1258	10.499	8.20901	7.00941	6.01625	5.19175	5.19175	4.7834	4.44449	4.16254	3.92751	3.73128	3.56717	3.4297	3.31435	3.21739	3.13574	3.06685	3.0086	2.95925	2.91733	2.88165	2.85119	2.82512	2.80274	2.78349	2.76686	2.75247	2.73997	2.72908	2.71957	2.71124	2.70392	2.69748	2.6918	2.68678	2.68234	2.6784	2.67491	2.67182	2.66909	2.66667	2.66454	2.66266	2.66102
CSys (µg/mL)	21	1	0	10.7268	13.4771	12.936	9.92788	8.3876	7.13811	6.12266	6.12266	5.64816	5.2646	4.95307	4.69887	4.49051	4.31889	4.17685	4.05868	3.95984	3.8767	3.80637	3.74652	3.69528	3.65117	3.61297	3.57971	3.5506	3.52499	3.50237	3.48231	3.46446	3.44852	3.43427	3.4215	3.41004	3.39976	3.39053	3.38225	3.37484	3.36822	3.36232	3.35709	3.35247	3.34842	3.3449	3.34187	3.3393	3.33715
CSys (µg/mL)	22	1	0	7.65146	12.6926	12.2835	9.85318	8.38431	7.07727	6.00688	5.1273	4.84162	4.25607	4.00105	3.79066	3.61714	3.47409	3.35626	3.25928	3.17957	3.11415	3.06058	3.01683	2.98121	2.95234	2.92906	2.91042	2.89564	2.88405	2.87512	2.86839	2.8635	2.86013	2.85804	2.857	2.85685	2.85743	2.85863	2.86035	2.86249	2.865	2.86781	2.87087	2.87416	2.87762	2.88124	2.885	2.88886	2.89283
CSys (µg/mL)	23	1	0	10.7107	13.5196	13.206	9.59243	7.83219	6.45144	5.36305	5.36305	4.87524	4.48772	4.17894	3.93237	3.73505	3.57679	3.44954	3.34696	3.26401	3.19672	3.14193	3.09715	3.06041	3.03012	3.00503	2.98417	2.96673	2.95208	2.93972	2.92926	2.92036	2.91278	2.90629	2.90074	2.89599	2.89193	2.88846	2.88552	2.88304	2.88096	2.87926	2.87789	2.87682	2.87603	2.87549	2.87518	2.87509	2.87519
CSys (µg/mL)	24	1	0	8.75911	10.8819	10.3053	7.79376	6.5106	5.47089	4.62687	4.62687	4.21915	3.88859	3.61964	3.40021	3.22074	3.07366	2.95293	2.85367	2.77196	2.70463	2.64908	2.6032	2.56529	2.53394	2.50799	2.4865	2.46871	2.45397	2.44176	2.43165	2.42329	2.41639	2.4107	2.40604	2.40222	2.39913	2.39665	2.39469	2.39316	2.39201	2.39118	2.39063	2.39031	2.39021	2.3903	2.39055	2.39094	2.39146
CSys (µg/mL)	25	1	0	7.60255	12.221	11.0208	8.27362	6.87242	5.74039	4.82543	4.82543	4.3836	4.02843	3.74216	3.51078	3.32331	3.17105	3.04713	2.9461	2.86359	2.79613	2.74093	2.69574	2.65875	2.62848	2.60374	2.58355	2.56711	2.55377	2.54299	2.53434	2.52744	2.52201	2.51779	2.51458	2.51221	2.51054	2.50945	2.50886	2.50868	2.50884	2.50929	2.50998	2.51089	2.51196	2.51319	2.51454	2.51599	2.51755
CSys (µg/mL)	26	1	0	9.10877	11.1887	9.99111	7.2577	5.93118	4.89511	4.08183	4.08183	3.72856	3.44917	3.22687	3.04912	2.90633	2.79109	2.69762	2.6214	2.55888	2.50729	2.46443	2.42858	2.39837	2.37274	2.35082	2.33196	2.3156	2.30133	2.2888	2.27774	2.26793	2.25918	2.25136	2.24435	2.23804	2.23236	2.22724	2.22261	2.21845	2.21469	2.21131	2.20827	2.20555	2.20313	2.20098	2.19907	2.19741	2.19596
CSys (µg/mL)	27	1	0	8.13277	10.0744	9.41813	7.25934	6.13787	5.21762	4.46136	4.46136	4.09097	3.78748	3.538	3.33236	3.16246	3.02184	2.90527	2.80851	2.72812	2.66127	2.60564	2.55934	2.5208	2.48871	2.46199	2.43977	2.4213	2.40597	2.39327	2.38276	2.37411	2.367	2.36121	2.35651	2.35275	2.34978	2.34748	2.34575	2.3445	2.34367	2.34319	2.34303	2.34313	2.34346	2.34399	2.34469	2.34556	2.34656
CSys (µg/mL)	28	1	0	11.8784	14.5561	12.9245	9.30047	7.53944	6.16232	5.08042	5.08042	4.6015	4.22218	3.92059	3.68021	3.48827	3.33478	3.21187	3.1133	3.03414	2.97046	2.91916	2.87775	2.84427	2.81714	2.79511	2.77718	2.76255	2.7506	2.74081	2.73278	2.72619	2.72076	2.71631	2.71265	2.70965	2.70721	2.70524	2.70367	2.70243	2.70149	2.70081	2.70035	2.70009	2.7	2.70008	2.7003	2.70065	2.70112
CSys (µg/mL)	29	1	0	8.95157	11.1719	10.5616	7.95058	6.62774	5.56287	4.70383	4.70383	4.3003	3.97533	3.71253	3.49926	3.32565	3.1839	3.06786	2.97259	2.89417	2.82944	2.77585	2.73135	2.69428	2.66331	2.63733	2.61548	2.59702	2.58139	2.5681	2.55677	2.54707	2.53876	2.53161	2.52546	2.52016	2.51558	2.51164	2.50826	2.50536	2.50288	2.50079	2.49903	2.49758	2.49641	2.49549	2.4948	2.49432	2.49404
CSys (µg/mL)	30	1	0	8.61366	13.5742	12.1334	9.03061	7.3315	5.99655	4.94291	4.10782	3.82633	3.58535	3.36028	3.17988	3.03526	2.91927	2.82621	2.7515	2.69149	2.64325	2.60445	2.57322	2.54807	2.52781	2.51148	2.49832	2.48773	2.47921	2.47238	2.46693	2.46259	2.45918	2.45653	2.45451	2.45301	2.45196	2.45128	2.45091	2.45082	2.45097	2.45132	2.45185	2.45254	2.45337	2.45433	2.45541	2.45659	2.45786
CSys (µg/mL)	31	1	0	8.60168	10.8208	10.4515	8.08674	6.85881	5.84834	5.01424	5.01424	4.60634	4.26918	3.9899	3.75825	3.56586	3.40591	3.2728	3.16193	3.06948	2.99232	2.92788	2.87399	2.8289	2.79112	2.75945	2.73288	2.71055	2.69179	2.67601	2.66272	2.65154	2.64212	2.63419	2.62751	2.6219	2.61719	2.61326	2.60998	2.60726	2.60503	2.60321	2.60176	2.60063	2.59977	2.59915	2.59875	2.59854	2.5985
CSys (µg/mL)	32	1	0	11.9094	14.9431	14.5433	10.8977	9.05615	7.57587	6.38267	5.41761	5.03073	4.71713	4.46194	4.25378	4.08373	3.94466	3.83086	3.73771	3.66145	3.59901	3.5479	3.50608	3.47188	3.44396	3.42119	3.40266	3.38764	3.37551	3.36578	3.35803	3.35194	3.34723	3.34367	3.34109	3.33931	3.33823	3.33774	3.33775	3.33819	3.339	3.34014	3.34156	3.34323	3.34512	3.34721	3.34947	3.35189	3.35446
CSys (µg/mL)	33	1	0	8.05311	10.0097	9.39628	7.03256	5.84516	4.89216	4.12402	4.12402	3.76243	3.46947	3.23143	3.03767	2.87975	2.7509	2.64566	2.55963	2.48923	2.43158	2.38431	2.34553	2.31367	2.28747	2.26591	2.24815	2.23351	2.22142	2.21144	2.2032	2.19639	2.19077	2.18614	2.18232	2.17919	2.17664	2.17457	2.17291	2.1716	2.17059	2.16984	2.1693	2.16896	2.16878	2.16876	2.16887	2.16909	2.16942
CSys (µg/mL)	34	1	0	7.83331	13.0595	12.463	9.79472	8.18712	6.81672	5.70954	4.8118	4.29989	4.00239	3.75435	3.55191	3.38672	3.25195	3.14204	3.05247	2.97951	2.92015	2.87191	2.83278	2.80109	2.77551	2.75492	2.73843	2.72529	2.7149	2.70678	2.7005	2.69575	2.69225	2.68978	2.68815	2.68723	2.68689	2.68702	2.68755	2.68841	2.68954	2.6909	2.69245	2.69416	2.69601	2.69797	2.70002	2.70216	2.70438
CSys (µg/mL)	35	1	0	10.1381	12.6724	12.1483	8.92463	7.32537	6.05842	5.05202	4.2497	3.94528	3.70171	3.50571	3.3473	3.21881	3.11426	3.02892	2.95906	2.90168	2.8544	2.81529	2.78281	2.75573	2.73306	2.71398	2.69785	2.68416	2.67248	2.66246	2.65385	2.6464	2.63994	2.63432	2.62942	2.62514	2.6214	2.61814	2.61528	2.6128	2.61065	2.60879	2.60721	2.60587	2.60475	2.60384	2.60312	2.60258	2.60221
CSys (µg/mL)	36	1	0	10.5376	13.2243	12.7569	9.34019	7.65485	6.32015	5.2583	5.2583	4.76822	4.3755	4.06015	3.80666	3.60278	3.43872	3.30669	3.20041	3.11488	3.04606	2.99071	2.94624	2.91054	2.88194	2.85908	2.84087	2.82643	2.81504	2.80614	2.79927	2.79405	2.79019	2.78743	2.7856	2.78451	2.78406	2.78412	2.78463	2.78551	2.7867	2.78815	2.78984	2.79172	2.79378	2.796	2.79834	2.80081	2.80339
CSys (µg/mL)	37	1	0	12.5835	15.5134	13.5214	8.6458	6.53068	5.0167	3.92561	3.92561	3.57421	3.3146	3.12038	2.97383	2.86262	2.7779	2.71317	2.66362	2.6256	2.59637	2.57383	2.55641	2.54289	2.53238	2.52416	2.51772	2.51265	2.50866	2.5055	2.50302	2.50106	2.49954	2.49837	2.49749	2.49686	2.49644	2.4962	2.49613	2.4962	2.4964	2.49672	2.49714	2.49767	2.49829	2.499	2.49979	2.50066	2.5016
CSys (µg/mL)	38	1	0	8.21236	12.5129	10.6663	8.09106	6.77994	5.7165	4.85079	4.85079	4.43075	4.08765	3.80687	3.57683	3.38816	3.23328	3.10603	3.0014	2.91532	2.84443	2.78604	2.7379	2.6982	2.66546	2.63845	2.61617	2.59781	2.58268	2.57024	2.56004	2.5517	2.54491	2.53942	2.53503	2.53156	2.52887	2.52685	2.52539	2.52441	2.52386	2.52367	2.52379	2.5242	2.52485	2.52572	2.52678	2.52802	2.52941
CSys (µg/mL)	39	1	0	8.72139	10.844	10.1656	7.90966	6.7305	5.75825	4.95537	4.95537	4.56355	4.24125	3.97526	3.75515	3.57259	3.42086	3.29455	3.18922	3.10128	3.02777	2.96625	2.9147	2.87148	2.83521	2.80476	2.77917	2.75766	2.73959	2.7244	2.71164	2.70094	2.69198	2.68449	2.67827	2.67312	2.66888	2.66544	2.66268	2.66051	2.65885	2.65764	2.65682	2.65635	2.65618	2.65629	2.65665	2.65722	2.658
CSys (µg/mL)	40	1	0	9.0171	11.2328	10.3161	7.45335	6.06026	4.97387	4.12453	4.12453	3.75889	3.4732	3.24849	3.07062	2.92896	2.81545	2.7239	2.64959	2.58883	2.53881	2.4973	2.4626	2.43335	2.4085	2.38722	2.36886	2.35291	2.33895	2.32666	2.31578	2.3061	2.29746	2.28971	2.28275	2.27649	2.27084	2.26574	2.26114	2.257	2.25327	2.24993	2.24693	2.24426	2.24189	2.23981	2.23798	2.2364	2.23504
CSys (µg/mL)	41	1	0	12.3704	15.1266	13.1517	8.90558	6.97432	5.53711	4.45982	4.45982	4.05321	3.74241	3.50312	3.31804	3.17435	3.06239	2.97482	2.90602	2.85167	2.80849	2.77395	2.74612	2.72352	2.70503	2.68977	2.67709	2.66646	2.65749	2.64989	2.6434	2.63785	2.6331	2.62903	2.62554	2.62257	2.62005	2.61794	2.6162	2.6148	2.61369	2.61288	2.61232	2.612	2.61191	2.61202	2.61234	2.61284	2.61351
CSys (µg/mL)	42	1	0	7.79678	9.84926	9.75143	7.79186	6.74171	5.85835	5.11426	5.11426	4.73977	4.42576	4.16191	3.93978	3.75246	3.59424	3.46038	3.34693	3.25061	3.16869	3.09887	3.03925	2.98822	2.94444	2.9068	2.87435	2.8463	2.82199	2.80086	2.78245	2.76635	2.75224	2.73984	2.7289	2.71924	2.71067	2.70307	2.69629	2.69025	2.68485	2.68002	2.6757	2.67182	2.66835	2.66523	2.66244	2.65995	2.65772
CSys (µg/mL)	43	1	0	8.13123	13.1469	11.7513	8.77456	7.28139	6.08645	5.12685	5.12685	4.6789	4.31822	4.02665	3.79024	3.59807	3.44154	3.31376	3.20924	3.12357	3.0532	2.99525	2.94742	2.90785	2.87501	2.84769	2.82489	2.80582	2.78982	2.77635	2.76499	2.75539	2.74725	2.74035	2.73449	2.72952	2.72531	2.72175	2.71876	2.71625	2.71418	2.71249	2.71114	2.71009	2.70931	2.70878	2.70848	2.70838	2.70847
CSys (µg/mL)	44	1	0	6.64215	10.7514	10.0615	7.89741	6.6219	5.56841	4.71374	4.01811	3.77594	3.33797	3.15821	3.01075	2.88955	2.78971	2.70727	2.63901	2.58234	2.53516	2.49575	2.46272	2.43495	2.41151	2.39166	2.37479	2.3604	2.34808	2.33751	2.3284	2.32055	2.31375	2.30787	2.30277	2.29835	2.29452	2.29122	2.28838	2.28594	2.28388	2.28214	2.28071	2.27954	2.27863	2.27794	2.27745	2.27717	2.27706
CSys (µg/mL)	45	1	0	8.85559	10.9998	10.5166	8.07428	6.81644	5.79216	4.9572	4.9572	4.55412	4.22752	3.96185	3.74487	3.56696	3.42047	3.29934	3.19873	3.11477	3.04436	2.98502	2.93473	2.89188	2.85517	2.82353	2.79611	2.7722	2.75125	2.73278	2.71642	2.70186	2.68884	2.67714	2.66661	2.65708	2.64844	2.6406	2.63345	2.62693	2.62099	2.61556	2.6106	2.60607	2.60195	2.59818	2.59476	2.59166	2.58885
CSys (µg/mL)	46	1	0	9.49023	14.7162	12.6629	9.57292	7.9556	6.65152	5.59601	4.73871	4.3877	4.10556	3.87015	3.67765	3.52025	3.39156	3.28637	3.20042	3.13021	3.0729	3.02614	2.98803	2.95701	2.9318	2.91137	2.89484	2.88153	2.87086	2.86236	2.85566	2.85042	2.84641	2.8434	2.84123	2.83975	2.83884	2.83841	2.83839	2.8387	2.8393	2.84013	2.84117	2.84238	2.84374	2.84523	2.84683	2.84853	2.85031
CSys (µg/mL)	47	1	0	12.4908	15.3717	13.5303	9.29029	7.3342	5.8616	4.74516	4.74516	4.3088	3.97198	3.71058	3.50704	3.34812	3.22373	3.12605	3.04909	2.98819	2.93977	2.90107	2.86994	2.84474	2.8242	2.80735	2.79341	2.78181	2.77208	2.76388	2.75693	2.75101	2.74596	2.74163	2.73794	2.73478	2.7321	2.72983	2.72794	2.72638	2.72513	2.72416	2.72344	2.72296	2.7227	2.72264	2.72277	2.72309	2.72357
CSys (µg/mL)	48	1	0	8.79334	10.8114	9.82301	7.03391	5.67818	4.62177	3.79668	3.79668	3.4314	3.14573	2.92109	2.74358	2.60276	2.49068	2.40123	2.32969	2.27238	2.22641	2.18951	2.15988	2.13607	2.11696	2.10162	2.08934	2.07951	2.07167	2.06545	2.06054	2.05669	2.05372	2.05145	2.04977	2.04857	2.04777	2.04729	2.04709	2.04712	2.04735	2.04774	2.04827	2.04893	2.04969	2.05055	2.05148	2.05249	2.05356
CSys (µg/mL)	49	1	0	8.00841	10.1619	10.1168	7.62432	6.3711	5.36485	4.55373	4.55373	4.17475	3.86834	3.61972	3.41736	3.2521	3.11669	3.00531	2.91335	2.83708	2.77355	2.72037	2.67564	2.63781	2.60566	2.57818	2.55458	2.53421	2.51653	2.50113	2.48765	2.47581	2.46538	2.45616	2.44801	2.44078	2.43436	2.42868	2.42364	2.41919	2.41526	2.41181	2.4088	2.4062	2.40396	2.40206	2.40049	2.3992	2.39819
CSys (µg/mL)	50	1	0	8.9324	13.7258	11.6831	8.82877	7.37526	6.19663	5.23772	5.23772	4.77391	4.39535	4.08583	3.83245	3.62481	3.45447	3.3146	3.19964	3.10507	3.02721	2.96305	2.91013	2.86645	2.83037	2.80054	2.77586	2.75544	2.73853	2.72453	2.71294	2.70336	2.69544	2.68891	2.68355	2.67916	2.67559	2.67272	2.67044	2.66867	2.66732	2.66634	2.66569	2.66531	2.66518	2.66526	2.66553	2.66598	2.66658
CSys (µg/mL)	51	1	0	9.86058	12.3113	11.6637	8.80583	7.35157	6.1749	5.21963	5.21963	4.76207	4.38923	4.08423	3.83407	3.62855	3.45954	3.32052	3.20618	3.1122	3.03504	2.97179	2.92004	2.87782	2.8435	2.81573	2.79337	2.77552	2.7614	2.75038	2.74192	2.7356	2.73105	2.72796	2.72611	2.72526	2.72526	2.72596	2.72725	2.72902	2.73119	2.7337	2.7365	2.73953	2.74275	2.74614	2.74966	2.7533	2.75703
CSys (µg/mL)	52	1	0	10.4797	12.9114	11.8597	8.95085	7.47687	6.28695	5.32287	5.32287	4.86395	4.49103	4.18709	3.93886	3.73581	3.56951	3.43313	3.32117	3.22914	3.15341	3.09103	3.03957	2.99708	2.96195	2.93286	2.90875	2.88875	2.87213	2.85831	2.84682	2.83725	2.82929	2.82266	2.81716	2.8126	2.80884	2.80575	2.80324	2.80121	2.79961	2.79838	2.79747	2.79683	2.79644	2.79626	2.79628	2.79648	2.79683
CSys (µg/mL)	53	1	0	8.86811	11.1137	10.6533	8.1702	6.89121	5.846	4.98943	4.98943	4.57474	4.23477	3.95539	3.7254	3.53573	3.37908	3.24948	3.14207	3.0529	2.97873	2.91692	2.86529	2.82209	2.78583	2.75535	2.72964	2.70792	2.6895	2.67385	2.66052	2.64914	2.63939	2.63102	2.62383	2.61764	2.6123	2.6077	2.60374	2.60032	2.59739	2.59488	2.59275	2.59094	2.58943	2.58819	2.58718	2.58639	2.5858
CSys (µg/mL)	54	1	0	11.6611	14.4707	13.3802	9.81516	8.06461	6.6843	5.5908	5.5908	5.10097	4.71063	4.39838	4.14795	3.94665	3.78451	3.65365	3.54778	3.46194	3.39215	3.33525	3.28874	3.2506	3.21922	3.19333	3.1719	3.1541	3.13928	3.12692	3.11658	3.10792	3.10067	3.09461	3.08954	3.08534	3.08187	3.07904	3.07677	3.07499	3.07364	3.07268	3.07207	3.07177	3.07175	3.072	3.07249	3.0732	3.07412
CSys (µg/mL)	55	1	0	7.82198	9.86881	9.78857	7.53703	6.37497	5.42486	4.64587	4.00507	3.73661	3.51572	3.33335	3.18249	3.05751	2.95389	2.86792	2.79656	2.73732	2.68813	2.64727	2.61335	2.58519	2.56183	2.54246	2.52643	2.51319	2.50228	2.49332	2.486	2.48006	2.47528	2.47149	2.46853	2.46628	2.46464	2.46351	2.46284	2.46255	2.46259	2.46293	2.46352	2.46434	2.46536	2.46655	2.46791	2.46941	2.47103
CSys (µg/mL)	56	1	0	8.47797	10.7738	10.924	8.42271	7.13588	6.08489	5.22387	5.22387	4.80644	4.46447	4.18352	3.9521	3.76099	3.60272	3.47126	3.36173	3.27016	3.19333	3.12862	3.07391	3.02746	2.98786	2.95396	2.92481	2.89964	2.87782	2.85884	2.84225	2.82772	2.81494	2.80369	2.79375	2.78496	2.77718	2.77029	2.76419	2.75881	2.75406	2.74988	2.74622	2.74305	2.7403	2.73796	2.73598	2.73435	2.73303
CSys (µg/mL)	57	1	0	10.0604	12.476	11.3241	8.07529	6.5101	5.29303	4.34179	4.34179	3.92872	3.60258	3.34424	3.13926	2.97641	2.84691	2.74382	2.66169	2.59618	2.54387	2.50206	2.4686	2.44178	2.42026	2.40297	2.38905	2.37784	2.3688	2.36151	2.35562	2.35087	2.34704	2.34397	2.34152	2.33957	2.33805	2.33688	2.33601	2.33539	2.33498	2.33476	2.3347	2.33479	2.335	2.33532	2.33574	2.33626	2.33686
CSys (µg/mL)	58	1	0	9.04769	13.9802	11.9972	9.17139	7.71512	6.52325	5.54474	5.54474	5.06265	4.66577	4.33857	4.06859	3.84566	3.66149	3.50929	3.38348	3.27947	3.19349	3.12244	3.06374	3.01529	2.97532	2.9424	2.91533	2.89312	2.87495	2.86013	2.84812	2.83843	2.83069	2.82457	2.81981	2.81618	2.8135	2.81162	2.81042	2.80978	2.80961	2.80986	2.81044	2.81132	2.81245	2.8138	2.81533	2.81702	2.81885
CSys (µg/mL)	59	1	0	8.67672	10.9155	10.6916	8.44332	7.25684	6.26969	5.44668	5.44668	5.03961	4.70141	4.41976	4.18467	3.98802	3.82312	3.68448	3.5676	3.46878	3.38495	3.31361	3.25269	3.20048	3.15557	3.11679	3.08319	3.05395	3.02843	3.00608	2.98643	2.9691	2.95379	2.94021	2.92816	2.91743	2.90787	2.89935	2.89175	2.88498	2.87895	2.87358	2.86882	2.86462	2.86091	2.85767	2.85486	2.85244	2.85038
CSys (µg/mL)	60	1	0	8.87806	14.3325	12.9933	9.85307	8.25381	6.96025	5.91141	5.91141	5.40875	5.0016	4.67061	4.40068	4.1799	3.99878	3.84977	3.72677	3.62492	3.54026	3.46963	3.41047	3.36069	3.31863	3.28291	3.25243	3.2263	3.20378	3.18427	3.1673	3.15246	3.13943	3.12794	3.11776	3.10873	3.10068	3.09349	3.08707	3.08131	3.07615	3.07152	3.06738	3.06367	3.06036	3.05742	3.05481	3.05251	3.05049
CSys (µg/mL)	61	1	0	8.91736	13.5522	11.3969	8.46109	6.99307	5.81833	4.87445	4.87445	4.42877	4.06865	3.77718	3.54104	3.34957	3.19423	3.06814	2.96574	2.88257	2.81499	2.76008	2.71547	2.67924	2.64982	2.62597	2.60665	2.59104	2.57845	2.56835	2.56028	2.55389	2.54887	2.545	2.54207	2.53992	2.53843	2.53748	2.537	2.53691	2.53716	2.53768	2.53846	2.53944	2.54061	2.54194	2.54342	2.54502	2.54674
CSys (µg/mL)	62	1	0	8.16596	12.9118	11.7658	9.21839	7.7944	6.62313	5.65692	4.85766	4.49944	4.22321	3.97329	3.76582	3.59353	3.45039	3.33145	3.23261	3.15045	3.08218	3.02545	2.97834	2.93924	2.9068	2.87994	2.85772	2.83939	2.8243	2.81193	2.80185	2.79367	2.7871	2.78189	2.77781	2.7747	2.77241	2.77081	2.7698	2.7693	2.76923	2.76953	2.77015	2.77105	2.77219	2.77355	2.77509	2.77679	2.77864
CSys (µg/mL)	63	1	0	8.95134	14.4628	12.8688	9.54579	7.88657	6.56207	5.50034	5.50034	5.00525	4.60609	4.2831	4.02118	3.80851	3.63569	3.4952	3.38098	3.28813	3.21267	3.15139	3.10166	3.06137	3.02877	3.00246	2.98129	2.96433	2.95081	2.94012	2.93174	2.92526	2.92035	2.91673	2.91417	2.9125	2.91156	2.91123	2.9114	2.91201	2.91297	2.91423	2.91575	2.9175	2.91943	2.92152	2.92375	2.92611	2.92858
CSys (µg/mL)	64	1	0	6.57016	8.22622	8.08028	6.41782	5.53161	4.7897	4.16793	4.16793	3.85344	3.59129	3.37227	3.18889	3.03507	2.90579	2.79693	2.70509	2.62747	2.56172	2.50591	2.45844	2.41796	2.38337	2.35373	2.32827	2.30634	2.2874	2.27101	2.25677	2.24438	2.23357	2.2241	2.21581	2.20852	2.20211	2.19645	2.19146	2.18705	2.18316	2.17972	2.17669	2.17402	2.17167	2.16962	2.16783	2.16629	2.16496
CSys (µg/mL)	65	1	0	7.34127	12.026	11.0099	8.29154	6.92394	5.82742	4.94539	4.94539	4.53343	4.2018	3.93354	3.71562	3.53787	3.39228	3.27248	3.17346	3.09119	3.02246	2.96474	2.91596	2.87448	2.839	2.80845	2.78198	2.75891	2.73868	2.72083	2.70501	2.69092	2.67831	2.66698	2.65677	2.64753	2.63917	2.63157	2.62467	2.61839	2.61267	2.60747	2.60273	2.59843	2.59453	2.591	2.58781	2.58494	2.58236
CSys (µg/mL)	66	1	0	11.7537	14.5968	13.4865	9.37571	7.44501	5.97078	4.83812	4.83812	4.36311	3.99281	3.70348	3.47729	3.30047	3.16229	3.05435	2.97009	2.90437	2.85317	2.81332	2.78239	2.75843	2.73996	2.72578	2.71498	2.70685	2.70082	2.69645	2.69339	2.69138	2.69021	2.68971	2.68974	2.69021	2.69104	2.69217	2.69353	2.6951	2.69684	2.69873	2.70075	2.70287	2.7051	2.70741	2.70979	2.71225	2.71477
CSys (µg/mL)	67	1	0	7.62156	11.7798	10.1492	7.82326	6.62268	5.63903	4.83056	4.83056	4.43526	4.10998	3.84179	3.62034	3.4372	3.28552	3.1597	3.05516	2.96817	2.89564	2.83506	2.78437	2.74186	2.70613	2.67604	2.65064	2.62914	2.61091	2.59541	2.5822	2.57093	2.56128	2.55302	2.54593	2.53984	2.53461	2.53012	2.52627	2.52298	2.52018	2.5178	2.5158	2.51414	2.51279	2.5117	2.51085	2.51023	2.50981
CSys (µg/mL)	68	1	0	7.85294	12.0248	10.1165	7.50421	6.1985	5.1537	4.31418	4.31418	3.91963	3.60062	3.34228	3.13288	2.96303	2.82518	2.71324	2.62232	2.54843	2.48838	2.43956	2.39988	2.36764	2.34143	2.32016	2.30291	2.28893	2.27764	2.26854	2.26124	2.25541	2.25079	2.24718	2.24438	2.24228	2.24074	2.23968	2.23901	2.23868	2.23863	2.23882	2.23922	2.2398	2.24052	2.24138	2.24236	2.24344	2.24461
CSys (µg/mL)	69	1	0	9.45324	14.3194	12.0302	8.93516	7.39694	6.17087	5.18893	5.18893	4.73174	4.36322	4.0656	3.82497	3.63025	3.47254	3.34471	3.24101	3.15683	3.08843	3.03283	2.9876	2.9508	2.92085	2.89648	2.87666	2.86056	2.84752	2.83698	2.82852	2.82177	2.81644	2.8123	2.80916	2.80686	2.80527	2.80429	2.80384	2.80384	2.80423	2.80498	2.80603	2.80735	2.80892	2.81071	2.8127	2.81487	2.81721
CSys (µg/mL)	70	1	0	10.7459	13.1981	11.9738	8.89428	7.36277	6.145	5.17306	5.17306	4.72801	4.3718	4.08538	3.85422	3.66699	3.51482	3.39068	3.28902	3.2054	3.13632	3.07897	3.03111	2.99094	2.95704	2.92827	2.9037	2.88259	2.86434	2.84849	2.83463	2.82247	2.81173	2.80222	2.79376	2.78622	2.77947	2.77343	2.76802	2.76316	2.75881	2.75491	2.75142	2.7483	2.74554	2.7431	2.74095	2.73907	2.73746
CSys (µg/mL)	71	1	0	9.49122	11.8564	11.2092	7.97233	6.41655	5.21045	4.27057	4.27057	3.85778	3.53238	3.27446	3.06935	2.90591	2.77553	2.67146	2.58839	2.52209	2.4692	2.42703	2.39345	2.36674	2.34552	2.32872	2.31545	2.30501	2.29685	2.29052	2.28565	2.28197	2.27925	2.2773	2.27597	2.27515	2.27475	2.27468	2.2749	2.27534	2.27597	2.27676	2.27768	2.27871	2.27984	2.28106	2.28234	2.28368	2.28508
CSys (µg/mL)	72	1	0	8.66805	10.9422	10.8534	8.21013	6.85828	5.75816	4.85975	4.85975	4.41706	4.05385	3.7554	3.50995	3.30801	3.14185	3.00514	2.89272	2.80033	2.72448	2.6623	2.61142	2.56989	2.53609	2.50869	2.48659	2.46888	2.45481	2.44375	2.43518	2.42868	2.4239	2.42053	2.41835	2.41714	2.41674	2.41702	2.41785	2.41914	2.42082	2.42281	2.42507	2.42754	2.4302	2.43301	2.43594	2.43898	2.4421
CSys (µg/mL)	73	1	0	7.41466	11.6728	10.4379	7.78726	6.34877	5.21614	4.32033	3.60889	3.36392	3.15657	2.96634	2.81385	2.69162	2.59364	2.51509	2.45211	2.40161	2.36113	2.32867	2.30266	2.28184	2.26518	2.25187	2.24128	2.23287	2.22624	2.22106	2.21704	2.21399	2.21172	2.21011	2.20904	2.20841	2.20816	2.20823	2.20858	2.20915	2.20992	2.21087	2.21197	2.21321	2.21457	2.21603	2.21759	2.21925	2.22098
CSys (µg/mL)	74	1	0	8.3655	10.5119	10.282	8.10436	6.95081	5.98668	5.17854	5.17854	4.76902	4.42527	4.13624	3.89297	3.68807	3.51542	3.36991	3.24725	3.14387	3.05676	2.98339	2.92165	2.86972	2.82611	2.78954	2.75892	2.73335	2.71206	2.69438	2.67978	2.66779	2.658	2.65009	2.64376	2.63879	2.63496	2.6321	2.63007	2.62874	2.62801	2.62778	2.62799	2.62856	2.62944	2.63059	2.63197	2.63354	2.63527
CSys (µg/mL)	75	1	0	11.3873	14.1552	13.043	9.47914	7.72833	6.34974	5.25988	5.25988	4.76965	4.37941	4.0671	3.81624	3.61425	3.45136	3.31989	3.21375	3.12808	3.05896	3.00326	2.95844	2.92243	2.89358	2.87054	2.85221	2.83771	2.82632	2.81746	2.81065	2.80551	2.80173	2.79906	2.79728	2.79624	2.7958	2.79585	2.7963	2.79708	2.79812	2.79939	2.80084	2.80244	2.80416	2.80598	2.80789	2.80988	2.81192
CSys (µg/mL)	76	1	0	10.8225	13.3915	12.4837	9.25513	7.6422	6.35923	5.3371	5.3371	4.86602	4.49201	4.19362	3.95445	3.76188	3.60615	3.47964	3.37642	3.2918	3.22211	3.16442	3.11642	3.07627	3.04248	3.01388	2.98953	2.96868	2.95071	2.93512	2.92154	2.90963	2.89913	2.88984	2.88157	2.87419	2.86759	2.86166	2.85633	2.85153	2.8472	2.8433	2.83979	2.83664	2.83381	2.83128	2.82903	2.82704	2.82528
CSys (µg/mL)	77	1	0	8.7839	14.2411	12.6646	9.14813	7.4285	6.07592	5.00651	5.00651	4.51873	4.12874	3.81587	3.56447	3.36232	3.19977	3.06913	2.96421	2.88006	2.81266	2.7588	2.71586	2.68175	2.65477	2.63355	2.61699	2.60418	2.59441	2.58709	2.58174	2.578	2.57555	2.57414	2.57357	2.57368	2.57433	2.57543	2.57687	2.57861	2.58057	2.58272	2.58501	2.58742	2.58993	2.5925	2.59514	2.59782	2.60054
CSys (µg/mL)	78	1	0	10.0654	12.718	12.5175	9.2953	7.67942	6.38396	5.34133	5.34133	4.84575	4.44463	4.11936	3.85531	3.64078	3.46638	3.32453	3.20913	3.11521	3.03878	2.97658	2.92598	2.88483	2.85139	2.82425	2.80225	2.78446	2.77011	2.75858	2.74937	2.74206	2.73631	2.73185	2.72846	2.72594	2.72416	2.72299	2.72232	2.72208	2.72219	2.72261	2.72329	2.72419	2.72528	2.72652	2.72791	2.72943	2.73105
CSys (µg/mL)	79	1	0	8.51415	10.6473	9.95301	6.8559	5.41365	4.31917	3.4833	3.4833	3.14005	2.87366	2.66644	2.50511	2.37942	2.28142	2.20494	2.14517	2.09838	2.06169	2.03286	2.01013	1.99216	1.97791	1.96656	1.95748	1.95018	1.94429	1.93951	1.93561	1.93242	1.92979	1.92762	1.92582	1.92432	1.92308	1.92205	1.9212	1.92051	1.91996	1.91952	1.91919	1.91895	1.9188	1.91872	1.91872	1.91879	1.91892
CSys (µg/mL)	80	1	0	10.1518	12.8598	12.9832	10.0882	8.58237	7.3436	6.32191	6.32191	5.8179	5.40274	5.05975	4.77574	4.54013	4.34434	4.18139	4.04558	3.93221	3.83745	3.75813	3.69164	3.63582	3.5889	3.54941	3.51613	3.48805	3.46435	3.44432	3.42739	3.41309	3.40102	3.39084	3.38229	3.37512	3.36915	3.36422	3.36018	3.35694	3.35438	3.35243	3.35102	3.35009	3.3496	3.34949	3.34974	3.3503	3.35116
CSys (µg/mL)	81	1	0	11.328	13.9285	12.4056	8.6602	6.89674	5.54866	4.51168	4.51168	4.08033	3.74373	3.48008	3.27322	3.1108	2.98323	2.88303	2.8043	2.74246	2.69387	2.65571	2.62574	2.60222	2.58377	2.56934	2.55806	2.5493	2.54251	2.53731	2.53336	2.53042	2.52829	2.52682	2.52588	2.52538	2.52523	2.52539	2.5258	2.52641	2.52721	2.52817	2.52926	2.53048	2.5318	2.53322	2.53472	2.5363	2.53796
CSys (µg/mL)	82	1	0	9.28356	11.6258	11.0287	7.8549	6.33176	5.14975	4.22737	4.22737	3.82369	3.50504	3.25287	3.05303	2.89447	2.76855	2.66843	2.58872	2.52518	2.47445	2.43389	2.4014	2.37533	2.35437	2.33749	2.32387	2.31287	2.30397	2.29677	2.29095	2.28624	2.28246	2.27943	2.27703	2.27515	2.27372	2.27266	2.27192	2.27146	2.27124	2.27123	2.27142	2.27177	2.27228	2.27292	2.2737	2.27459	2.27559
CSys (µg/mL)	83	1	0	8.83314	11.0295	10.3177	7.21017	5.74431	4.62585	3.7686	3.7686	3.41266	3.13757	2.92354	2.75615	2.6247	2.5211	2.43917	2.37416	2.32239	2.281	2.24778	2.221	2.1993	2.18163	2.16716	2.15526	2.1454	2.13721	2.13037	2.12463	2.11979	2.11572	2.11228	2.10937	2.10693	2.10489	2.10319	2.10181	2.10069	2.09983	2.09919	2.09875	2.0985	2.09842	2.09851	2.09874	2.09912	2.09962
CSys (µg/mL)	84	1	0	9.10415	11.4472	11.1049	8.644	7.36045	6.30321	5.43068	5.43068	5.00577	4.6562	4.36767	4.12887	3.93072	3.76593	3.62857	3.51381	3.4177	3.33701	3.26909	3.21176	3.16323	3.12203	3.08694	3.05694	3.03122	3.00909	2.98997	2.9734	2.95898	2.9464	2.93537	2.92569	2.91715	2.90961	2.90292	2.89699	2.89171	2.88702	2.88284	2.87911	2.8758	2.87286	2.87024	2.86794	2.8659	2.86413
CSys (µg/mL)	85	1	0	9.75794	12.0183	11.0443	8.33506	6.95703	5.84152	4.93549	4.93549	4.49916	4.14365	3.85321	3.6155	3.42067	3.26082	3.12954	3.02163	2.93286	2.8598	2.79962	2.75002	2.70914	2.67542	2.6476	2.62466	2.60573	2.59013	2.57727	2.5667	2.55802	2.55092	2.54513	2.54043	2.53666	2.53366	2.5313	2.5295	2.52817	2.52723	2.52664	2.52634	2.52629	2.52647	2.52684	2.52739	2.52808	2.52891
CSys (µg/mL)	86	1	0	11.7501	17.6597	14.2736	9.98761	7.97821	6.44628	5.27121	5.27121	4.79138	4.4182	4.12675	3.89831	3.71854	3.57644	3.46354	3.3733	3.30071	3.2419	3.19389	3.15437	3.12158	3.09413	3.07096	3.05124	3.03432	3.01971	3.00701	2.9959	2.98614	2.97754	2.96993	2.96319	2.95721	2.95191	2.94722	2.94308	2.93943	2.93624	2.93347	2.93108	2.92904	2.92733	2.92593	2.92481	2.92396	2.92335
CSys (µg/mL)	87	1	0	11.1431	13.7915	12.945	9.69483	8.05718	6.74574	5.69387	5.69387	5.20122	4.80755	4.49155	4.23681	4.03063	3.86312	3.72651	3.61471	3.52286	3.44714	3.38446	3.33238	3.28894	3.25254	3.22192	3.19604	3.17408	3.15535	3.13932	3.12554	3.11365	3.10334	3.09439	3.0866	3.07979	3.07384	3.06864	3.0641	3.06013	3.05667	3.05368	3.0511	3.0489	3.04704	3.0455	3.04424	3.04325	3.04251
CSys (µg/mL)	88	1	0	6.49809	8.20744	8.24272	6.45877	5.51716	4.73387	4.0809	3.53522	3.29218	3.08919	2.91922	2.7767	2.65706	2.55655	2.47209	2.40107	2.34136	2.29114	2.24891	2.21341	2.18358	2.15853	2.1375	2.11988	2.10512	2.0928	2.08253	2.074	2.06694	2.06113	2.05638	2.05253	2.04945	2.04703	2.04516	2.04377	2.04279	2.04216	2.04183	2.04176	2.04192	2.04228	2.0428	2.04347	2.04427	2.04519
CSys (µg/mL)	89	1	0	8.32799	10.461	10.2242	7.62495	6.3226	5.28212	4.44836	4.44836	4.05769	3.74428	3.49178	3.28764	3.12213	2.98758	2.87792	2.78833	2.71495	2.65468	2.60505	2.56406	2.5301	2.50187	2.47833	2.45863	2.44208	2.42814	2.41635	2.40635	2.39784	2.39058	2.38437	2.37906	2.37451	2.37061	2.36727	2.36442	2.36201	2.35997	2.35827	2.35686	2.35573	2.35484	2.35418	2.35371	2.35344	2.35334
CSys (µg/mL)	90	1	0	9.74315	12.3272	12.3334	9.40469	7.91509	6.71192	5.7377	5.7377	5.27699	4.90485	4.60277	4.35641	4.15455	3.98835	3.85081	3.73637	3.64061	3.56001	3.49174	3.43356	3.38365	3.34058	3.30316	3.27048	3.24175	3.21638	3.19385	3.17376	3.15577	3.13962	3.12506	3.11191	3.10001	3.08923	3.07946	3.07059	3.06254	3.05525	3.04864	3.04267	3.03728	3.03243	3.02808	3.0242	3.02076	3.01772
CSys (µg/mL)	91	1	0	10.8874	13.3354	12.1105	7.81342	5.93304	4.57087	3.57479	2.83998	2.66515	2.52881	2.42278	2.34089	2.27811	2.2303	2.19407	2.16675	2.14624	2.13092	2.11954	2.11115	2.10504	2.10065	2.09758	2.09552	2.09424	2.09356	2.09334	2.0935	2.09394	2.09462	2.09549	2.09652	2.09768	2.09895	2.10032	2.10177	2.1033	2.10489	2.10654	2.10825	2.11001	2.11181	2.11366	2.11555	2.11748	2.11945
CSys (µg/mL)	92	1	0	9.29273	11.6703	11.1495	8.49255	7.1322	6.02681	5.12607	5.12607	4.69662	4.34648	4.06	3.825	3.63185	3.47285	3.34181	3.23369	3.14441	3.07063	3.00962	2.95914	2.91735	2.88275	2.85409	2.83035	2.81069	2.79442	2.78097	2.76985	2.7607	2.75317	2.74702	2.74201	2.73796	2.73473	2.73219	2.73024	2.72878	2.72775	2.72709	2.72675	2.72668	2.72685	2.72724	2.72781	2.72855	2.72943
CSys (µg/mL)	93	1	0	10.8993	13.6363	13.105	9.66011	7.94722	6.58759	5.50527	4.6405	4.31022	4.04532	3.83169	3.65871	3.51821	3.40378	3.31034	3.23386	3.1711	3.11945	3.07681	3.04151	3.01219	2.98774	2.96728	2.95009	2.9356	2.92333	2.91291	2.90403	2.89643	2.88992	2.88432	2.87951	2.87537	2.87181	2.86876	2.86614	2.86392	2.86205	2.86048	2.8592	2.85817	2.85738	2.85679	2.85641	2.8562	2.85616
CSys (µg/mL)	94	1	0	8.15194	9.99491	9.01786	6.63691	5.45106	4.50602	3.74984	3.74984	3.39545	3.11002	2.87948	2.69297	2.54196	2.41963	2.32055	2.24031	2.17537	2.12286	2.08046	2.04629	2.01881	1.99678	1.97919	1.96522	1.9542	1.94559	1.93894	1.93389	1.93015	1.92748	1.92568	1.9246	1.9241	1.92409	1.92447	1.92517	1.92614	1.92732	1.92869	1.93021	1.93185	1.93359	1.93542	1.93732	1.93928	1.94129
CSys (µg/mL)	95	1	0	13.3248	16.5987	15.5084	11.5068	9.50698	7.90699	6.62098	6.62098	6.0195	5.53252	5.13737	4.81645	4.55574	4.34397	4.17202	4.0325	3.9194	3.82785	3.75388	3.69425	3.64633	3.60796	3.5774	3.55321	3.53424	3.51953	3.5083	3.49992	3.49388	3.48975	3.48718	3.4859	3.48567	3.48631	3.48766	3.48959	3.49201	3.49482	3.49797	3.50139	3.50503	3.50887	3.51286	3.51698	3.52121	3.52554
CSys (µg/mL)	96	1	0	7.48737	11.4613	9.5854	6.88162	5.55161	4.52061	3.71712	3.08776	2.87041	2.6984	2.5604	2.45035	2.36248	2.2922	2.23585	2.19054	2.154	2.12441	2.10034	2.08068	2.06454	2.05121	2.04015	2.03092	2.02317	2.01664	2.0111	2.00639	2.00236	1.99891	1.99596	1.99342	1.99124	1.98938	1.9878	1.98646	1.98535	1.98443	1.98369	1.98312	1.9827	1.98241	1.98226	1.98222	1.9823	1.98248
CSys (µg/mL)	97	1	0	8.68112	10.9417	10.8649	8.39066	7.10737	6.05504	5.19034	4.47793	4.17645	3.92857	3.72403	3.55476	3.41435	3.29763	3.20041	3.11925	3.05136	2.99444	2.94661	2.90632	2.87229	2.84347	2.81901	2.79819	2.78042	2.76521	2.75216	2.74095	2.73128	2.72294	2.71574	2.70951	2.70412	2.69946	2.69544	2.69198	2.68902	2.68649	2.68435	2.68257	2.6811	2.67991	2.67899	2.6783	2.67784	2.67757
CSys (µg/mL)	98	1	0	10.6618	13.4323	14.0213	10.841	9.19989	7.85791	6.75765	5.85274	5.45819	5.13403	4.86665	4.64533	4.46148	4.30817	4.17981	4.07189	3.98074	3.90341	3.83748	3.78101	3.73241	3.69038	3.65388	3.62203	3.59413	3.56961	3.54797	3.52883	3.51186	3.49678	3.48337	3.47143	3.46081	3.45136	3.44296	3.43552	3.42895	3.42317	3.41812	3.41373	3.40996	3.40676	3.40408	3.40189	3.40016	3.39886
CSys (µg/mL)	99	1	0	7.92919	10.0324	10.0629	7.66785	6.4346	5.42568	4.59747	4.59747	4.18455	3.84409	3.56291	3.33048	3.13824	2.97918	2.84756	2.73866	2.64859	2.57413	2.51263	2.46189	2.4201	2.38573	2.35755	2.3345	2.31572	2.30051	2.28826	2.27847	2.27073	2.26471	2.2601	2.25669	2.25426	2.25265	2.25174	2.25139	2.25152	2.25205	2.25291	2.25405	2.25542	2.25698	2.2587	2.26055	2.26252	2.26458
CSys (µg/mL)	100	1	0	8.64056	14.014	12.5652	9.19514	7.53926	6.23455	5.20228	5.20228	4.7353	4.36393	4.06717	3.82915	3.63763	3.48309	3.35799	3.25642	3.17366	3.106	3.05045	3.00465	2.96671	2.93514	2.90872	2.8865	2.8677	2.85172	2.83805	2.8263	2.81614	2.80733	2.79964	2.79292	2.78701	2.78182	2.77725	2.77321	2.76966	2.76653	2.76378	2.76138	2.75929	2.75749	2.75595	2.75466	2.75359	2.75273
CSys (µg/mL)	101	1	0	8.41868	10.3549	9.47483	7.1241	5.94478	5.00123	4.24372	4.24372	3.89362	3.61219	3.38472	3.19993	3.04905	2.92521	2.823	2.73814	2.66724	2.60762	2.55713	2.51408	2.47712	2.44516	2.41733	2.39294	2.37143	2.35235	2.33534	2.32008	2.30635	2.29394	2.28269	2.27246	2.26314	2.25462	2.24684	2.23972	2.23319	2.22722	2.22174	2.21673	2.21215	2.20797	2.20415	2.20068	2.19753	2.19467
CSys (µg/mL)	102	1	0	8.29612	10.4411	10.267	7.7059	6.41144	5.37017	4.53013	4.53013	4.1293	3.80532	3.54235	3.32816	3.15316	3.00978	2.89197	2.79491	2.71469	2.6482	2.59291	2.54675	2.50809	2.47557	2.44809	2.42478	2.4049	2.38786	2.37319	2.3605	2.34945	2.33979	2.33131	2.32381	2.31716	2.31124	2.30595	2.3012	2.29693	2.29307	2.28959	2.28643	2.28357	2.28098	2.27863	2.27649	2.27456	2.27281
CSys (µg/mL)	103	1	0	7.86698	10.0219	10.1992	7.75963	6.51267	5.49907	4.67258	4.67258	4.27062	3.94221	3.67329	3.45267	3.27133	3.122	2.99878	2.89689	2.81245	2.7423	2.68388	2.63509	2.59423	2.5599	2.53096	2.50649	2.48573	2.46804	2.45293	2.43997	2.42881	2.41918	2.41084	2.4036	2.39729	2.39179	2.38699	2.38279	2.37912	2.37591	2.37312	2.37069	2.36859	2.36678	2.36524	2.36395	2.36287	2.362
CSys (µg/mL)	104	1	0	8.9789	11.1602	10.695	8.22854	6.94893	5.90022	5.03964	5.03964	4.61484	4.2675	3.98261	3.7483	3.55509	3.39539	3.26308	3.15321	3.06175	2.98544	2.92161	2.86809	2.82309	2.78515	2.75307	2.72585	2.7027	2.68293	2.666	2.65145	2.63891	2.62805	2.61863	2.61044	2.60328	2.59701	2.59152	2.58669	2.58244	2.57869	2.57539	2.57249	2.56994	2.56769	2.56573	2.56403	2.56256	2.56129
CSys (µg/mL)	105	1	0	11.5713	14.4381	13.1283	8.76028	6.80067	5.35916	4.29102	4.29102	3.90473	3.6123	3.38878	3.21686	3.08399	2.9809	2.9006	2.83778	2.78838	2.74932	2.71821	2.69326	2.67308	2.65662	2.64307	2.63181	2.62237	2.61439	2.60759	2.60175	2.59672	2.59236	2.58857	2.58527	2.5824	2.57991	2.57775	2.5759	2.57433	2.57301	2.57192	2.57105	2.57037	2.56989	2.56959	2.56945	2.56946	2.56963
CSys (µg/mL)	106	1	0	11.2988	14.0805	12.868	8.73295	6.84391	5.43587	4.37971	4.37971	3.97725	3.67041	3.43447	3.252	3.11031	2.99995	2.91374	2.84623	2.79321	2.75143	2.71838	2.69215	2.67122	2.65446	2.64096	2.63004	2.62117	2.61394	2.60801	2.60316	2.59917	2.5959	2.59324	2.59109	2.58937	2.58803	2.58701	2.58629	2.58583	2.5856	2.58559	2.58577	2.58613	2.58665	2.58733	2.58816	2.58912	2.59021
CSys (µg/mL)	107	1	0	8.3093	10.4769	10.3819	7.90988	6.64549	5.61736	4.77871	4.77871	4.3712	4.03825	3.76552	3.54169	3.35765	3.20604	3.08089	2.97739	2.89159	2.82031	2.76093	2.71136	2.66984	2.63497	2.6056	2.58078	2.55973	2.54183	2.52655	2.51347	2.50222	2.49254	2.48417	2.47692	2.47064	2.46517	2.46042	2.45628	2.45268	2.44956	2.44686	2.44453	2.44253	2.44083	2.43941	2.43823	2.43728	2.43654
CSys (µg/mL)	108	1	0	8.5917	10.7638	10.5435	8.3436	7.17597	6.19978	5.38192	5.38192	4.96816	4.62217	4.33232	4.08914	3.88485	3.71301	3.56828	3.44622	3.34315	3.25599	3.18217	3.11957	3.0664	3.02117	2.98262	2.94973	2.92161	2.89752	2.87687	2.85913	2.84386	2.83071	2.81937	2.80958	2.80113	2.79382	2.78751	2.78206	2.77737	2.77333	2.76987	2.76692	2.76442	2.76232	2.76059	2.75917	2.75804	2.75717
CSys (µg/mL)	109	1	0	9.78726	12.0551	10.6474	7.33939	5.80515	4.64587	3.76411	3.76411	3.41486	3.14489	2.93509	2.77149	2.64358	2.54326	2.46433	2.40199	2.35252	2.31306	2.28139	2.25579	2.23496	2.21785	2.20368	2.19185	2.18187	2.17337	2.16608	2.15977	2.15426	2.14942	2.14515	2.14135	2.13796	2.13493	2.13221	2.12977	2.12758	2.12562	2.12386	2.12229	2.1209	2.11967	2.11859	2.11766	2.11685	2.11618
CSys (µg/mL)	110	1	0	8.82573	14.3794	13.1259	9.85316	8.20895	6.8903	5.82839	5.82839	5.3275	4.92245	4.59363	4.326	4.10775	3.92947	3.78364	3.66419	3.56623	3.48577	3.41961	3.36513	3.32022	3.28313	3.25247	3.22711	3.2061	3.18869	3.17425	3.16229	3.1524	3.14422	3.1375	3.132	3.12753	3.12394	3.12111	3.11893	3.11731	3.11619	3.1155	3.1152	3.11524	3.11558	3.1162	3.11708	3.11818	3.11949
CSys (µg/mL)	111	1	0	10.0873	12.6772	12.1438	9.28845	7.8278	6.64303	5.67987	5.67987	5.22762	4.86105	4.56257	4.31854	4.11823	3.95318	3.81662	3.70318	3.60853	3.52918	3.46235	3.40577	3.35763	3.31644	3.28102	3.25038	3.22374	3.20045	3.17999	3.16194	3.14592	3.13167	3.11893	3.1075	3.09724	3.08799	3.07963	3.07209	3.06526	3.05909	3.0535	3.04845	3.0439	3.0398	3.03612	3.03283	3.0299	3.02731
CSys (µg/mL)	112	1	0	9.49713	11.9773	11.7734	8.74136	7.22929	6.02556	5.06433	5.06433	4.61864	4.26217	3.9757	3.74453	3.55728	3.40503	3.28075	3.17889	3.09504	3.02569	2.96805	2.9199	2.87944	2.84525	2.81619	2.79134	2.76997	2.75148	2.73538	2.7213	2.70892	2.69798	2.68827	2.67962	2.6719	2.66498	2.65878	2.65321	2.6482	2.64369	2.63965	2.63602	2.63278	2.62988	2.62731	2.62504	2.62304	2.62131
CSys (µg/mL)	113	1	0	7.13816	9.05832	9.12221	6.96641	5.85768	4.95134	4.20784	4.20784	3.84054	3.53809	3.28863	3.0827	2.91261	2.77207	2.65592	2.55993	2.48061	2.41511	2.36103	2.31643	2.2797	2.24948	2.22468	2.20437	2.18779	2.17432	2.16343	2.15469	2.14773	2.14227	2.13804	2.13485	2.13252	2.13092	2.12992	2.12942	2.12935	2.12964	2.13023	2.13106	2.13212	2.13335	2.13474	2.13626	2.13789	2.13961
CSys (µg/mL)	114	1	0	8.80562	13.8372	12.3226	8.97278	7.17294	5.78434	4.70696	3.86701	3.60688	3.384	3.17491	3.00988	2.87988	2.77762	2.69731	2.63435	2.58509	2.54664	2.51671	2.4935	2.47559	2.46186	2.45142	2.4436	2.43783	2.43369	2.43084	2.42901	2.42799	2.42762	2.42776	2.42832	2.42921	2.43037	2.43175	2.43331	2.43501	2.43683	2.43875	2.44075	2.44283	2.44496	2.44715	2.44939	2.45167	2.45398
CSys (µg/mL)	115	1	0	10.458	13.0191	12.1768	9.06185	7.51089	6.27534	5.287	5.287	4.83439	4.47091	4.17789	3.94094	3.74882	3.59261	3.46523	3.36103	3.27551	3.20507	3.14683	3.09849	3.05819	3.02445	2.99607	2.9721	2.95176	2.93443	2.91961	2.90687	2.89591	2.88643	2.87824	2.87113	2.86498	2.85965	2.85505	2.85108	2.84769	2.84481	2.84239	2.84039	2.83878	2.83751	2.83656	2.83592	2.83555	2.83543
CSys (µg/mL)	116	1	0	8.88298	11.1484	10.8263	8.05834	6.66684	5.55242	4.65737	3.936	3.6498	3.41832	3.2303	3.07715	2.95212	2.8499	2.76619	2.69756	2.64121	2.59488	2.55674	2.52528	2.4993	2.4778	2.45999	2.4452	2.4329	2.42266	2.41411	2.40698	2.40102	2.39604	2.39188	2.3884	2.38551	2.38312	2.38115	2.37954	2.37824	2.37722	2.37644	2.37587	2.37548	2.37526	2.37519	2.37526	2.37545	2.37575
CSys (µg/mL)	117	1	0	7.3352	9.16279	8.94517	7.05469	6.05541	5.22418	4.53175	4.53175	4.18474	3.89694	3.65756	3.45793	3.29109	3.15134	3.03406	2.93545	2.85236	2.78224	2.72293	2.67267	2.63001	2.59371	2.56277	2.53634	2.51373	2.49433	2.47766	2.46332	2.45096	2.44028	2.43106	2.42308	2.41618	2.41021	2.40506	2.40061	2.39679	2.39351	2.39073	2.38837	2.3864	2.38479	2.38348	2.38246	2.38171	2.38119
CSys (µg/mL)	118	1	0	9.65254	11.9148	10.9665	8.29404	6.93723	5.84016	4.94987	4.94987	4.5258	4.18064	3.89889	3.66845	3.4797	3.32491	3.19782	3.09337	3.00743	2.93665	2.8783	2.83016	2.79041	2.75755	2.73038	2.70789	2.68928	2.67388	2.66114	2.65061	2.64192	2.63477	2.62892	2.62415	2.6203	2.61723	2.61482	2.61298	2.61163	2.6107	2.61014	2.6099	2.60995	2.61025	2.61077	2.61149	2.6124	2.61347
CSys (µg/mL)	119	1	0	10.089	12.6508	12.3162	9.22444	7.66876	6.41854	5.40977	5.40977	4.92898	4.53927	4.22261	3.96494	3.75502	3.58382	3.44409	3.32993	3.23659	3.16021	3.09766	3.04641	3.00438	2.9699	2.9416	2.91837	2.89931	2.88366	2.87085	2.86036	2.85181	2.84485	2.83924	2.83473	2.83117	2.82839	2.82628	2.82473	2.82368	2.82303	2.82275	2.82279	2.8231	2.82365	2.82442	2.82538	2.82651	2.8278
CSys (µg/mL)	120	1	0	7.65981	9.60367	9.54381	7.70253	6.70518	5.85917	5.14059	5.14059	4.7691	4.45475	4.18818	3.96173	3.76909	3.60499	3.46505	3.34557	3.24345	3.1561	3.08131	3.0172	2.96221	2.91499	2.8744	2.83949	2.80944	2.78354	2.7612	2.74191	2.72525	2.71084	2.69838	2.68758	2.67823	2.67013	2.66311	2.65703	2.65176	2.64721	2.64327	2.63987	2.63695	2.63444	2.63231	2.6305	2.62898	2.62772
CSys (µg/mL)	121	1	0	11.5039	14.2546	12.8763	9.13335	7.34615	5.96508	4.89163	4.89163	4.43558	4.07691	3.79389	3.57021	3.39325	3.25316	3.14216	3.05414	2.98429	2.9288	2.88468	2.84956	2.82158	2.79927	2.78146	2.76724	2.75588	2.74681	2.73959	2.73385	2.72932	2.72576	2.723	2.72089	2.71934	2.71823	2.71751	2.71712	2.71701	2.71714	2.71748	2.71801	2.7187	2.71954	2.72052	2.72162	2.72283	2.72414
CSys (µg/mL)	122	1	0	8.39293	13.7792	12.6635	9.57983	8.0177	6.75876	5.74122	5.74122	5.25954	4.87026	4.55435	4.29705	4.08675	3.91424	3.7722	3.65476	3.55724	3.4759	3.40772	3.35028	3.30163	3.2602	3.22473	3.19419	3.16776	3.14476	3.12465	3.10698	3.09138	3.07757	3.06528	3.05433	3.04454	3.03577	3.02792	3.02086	3.01454	3.00886	3.00378	2.99924	2.9952	2.99161	2.98843	2.98565	2.98322	2.98113
CSys (µg/mL)	123	1	0	14.8248	18.2815	16.3326	10.8923	8.43607	6.61502	5.25462	5.25462	4.73859	4.34416	4.04174	3.80966	3.63153	3.49478	3.38974	3.30901	3.24689	3.19902	3.16207	3.13349	3.11135	3.09416	3.08078	3.07036	3.06224	3.0559	3.05098	3.04717	3.04425	3.04204	3.04041	3.03926	3.03851	3.03809	3.03796	3.03808	3.03842	3.03895	3.03965	3.04052	3.04153	3.04267	3.04393	3.04532	3.04681	3.0484
CSys (µg/mL)	124	1	0	8.76217	10.9804	10.6205	7.89096	6.5331	5.45256	4.58947	4.58947	4.19056	3.87091	3.61371	3.406	3.23763	3.1006	2.98861	2.89665	2.82075	2.75778	2.70523	2.66111	2.62384	2.59214	2.56502	2.54166	2.52141	2.50375	2.48826	2.4746	2.4625	2.45172	2.44209	2.43346	2.4257	2.41871	2.4124	2.4067	2.40156	2.39691	2.39271	2.38893	2.38552	2.38247	2.37974	2.37731	2.37517	2.37328
CSys (µg/mL)	125	1	0	8.90674	11.2586	11.1759	8.39171	6.98554	5.85466	4.94243	4.94243	4.50852	4.15797	3.87373	3.64257	3.45413	3.30015	3.17405	3.07054	2.98538	2.91513	2.85704	2.80886	2.76877	2.73532	2.70731	2.68377	2.66392	2.64711	2.63283	2.62065	2.61022	2.60127	2.59355	2.58688	2.5811	2.57608	2.57172	2.56793	2.56463	2.56177	2.55929	2.55716	2.55533	2.55377	2.55246	2.55138	2.55051	2.54983
CSys (µg/mL)	126	1	0	8.67602	10.9613	11.0049	8.48285	7.1828	6.12174	5.25386	5.25386	4.8324	4.48859	4.20699	3.97547	3.78444	3.62622	3.49467	3.38483	3.29273	3.21514	3.14947	3.09361	3.04584	3.00479	2.96932	2.93852	2.91164	2.88806	2.86728	2.84889	2.83255	2.81798	2.80494	2.79324	2.78273	2.77325	2.76471	2.757	2.75003	2.74375	2.73808	2.73298	2.72839	2.72427	2.7206	2.71734	2.71445	2.71192
CSys (µg/mL)	127	1	0	8.30945	10.2429	9.39391	6.81207	5.54581	4.55305	3.77343	3.77343	3.42537	3.15276	2.93811	2.76822	2.6331	2.52512	2.43842	2.3685	2.31183	2.2657	2.22794	2.19689	2.17122	2.14988	2.13203	2.11703	2.10433	2.09353	2.08429	2.07635	2.06947	2.0635	2.0583	2.05374	2.04974	2.04622	2.04312	2.04039	2.03799	2.03589	2.03404	2.03244	2.03105	2.02987	2.02887	2.02804	2.02737	2.02685
CSys (µg/mL)	128	1	0	10.3103	13.0194	12.996	9.9431	8.3784	7.10502	6.06534	6.06534	5.56003	5.14688	4.80797	4.52933	4.29989	4.11075	3.95469	3.82585	3.71944	3.63152	3.55886	3.49883	3.44923	3.40828	3.37449	3.34664	3.32371	3.30489	3.28949	3.27692	3.26673	3.25853	3.25199	3.24684	3.24288	3.2399	3.23777	3.23636	3.23555	3.23526	3.23542	3.23597	3.23686	3.23804	3.23948	3.24114	3.24301	3.24505
CSys (µg/mL)	129	1	0	10.5902	13.2813	12.7974	9.37403	7.69062	6.36414	5.31474	5.31474	4.83947	4.46168	4.15973	3.9174	3.72225	3.56464	3.43699	3.33331	3.24887	3.17989	3.12336	3.07686	3.03847	3.00666	2.98018	2.95804	2.93945	2.92377	2.91048	2.89916	2.88949	2.88118	2.87404	2.86786	2.86252	2.85789	2.85387	2.85039	2.84739	2.8448	2.84258	2.8407	2.83912	2.83782	2.83677	2.83595	2.83535	2.83494
CSys (µg/mL)	130	1	0	9.80274	15.6717	13.6855	9.65652	7.73446	6.25266	5.10426	5.10426	4.60888	4.22062	3.91485	3.67338	3.48236	3.33113	3.21133	3.1164	3.04119	2.98161	2.93443	2.89709	2.86757	2.84426	2.82591	2.81149	2.80021	2.79145	2.78469	2.77955	2.77571	2.77291	2.77096	2.7697	2.769	2.76877	2.76892	2.76939	2.77012	2.77108	2.77224	2.77356	2.77502	2.77661	2.77831	2.78012	2.78201	2.78398
CSys (µg/mL)	131	1	0	7.70064	12.7223	11.8459	9.11808	7.71139	6.5615	5.61885	5.61885	5.15876	4.78147	4.47099	4.21474	4.00269	3.82676	3.6804	3.55833	3.4562	3.37051	3.29837	3.23743	3.18576	3.14179	3.10422	3.07198	3.0442	3.02015	2.99925	2.98099	2.96498	2.95088	2.9384	2.92731	2.91743	2.90859	2.90066	2.89351	2.88707	2.88124	2.87596	2.87117	2.86681	2.86286	2.85927	2.85601	2.85304	2.85036
CSys (µg/mL)	132	1	0	9.73783	12.2385	11.8527	8.68148	7.12345	5.89833	4.93214	4.93214	4.49948	4.15809	3.88708	3.67077	3.49717	3.35708	3.2434	3.15059	3.07433	3.01126	2.95873	2.91468	2.87747	2.8458	2.81868	2.79528	2.77497	2.75724	2.74168	2.72796	2.71582	2.70504	2.69544	2.68688	2.67924	2.67243	2.66635	2.66094	2.65613	2.65188	2.64813	2.64485	2.64201	2.63956	2.63749	2.63576	2.63436	2.63326
CSys (µg/mL)	133	1	0	10.067	12.663	12.4214	9.30994	7.75487	6.5162	5.52688	5.52688	5.0728	4.71068	4.42009	4.18548	3.99492	3.83918	3.71108	3.60502	3.5166	3.44235	3.37957	3.32608	3.2802	3.24057	3.20611	3.17596	3.14944	3.12598	3.10514	3.08656	3.06994	3.05503	3.04164	3.02959	3.01874	3.00897	3.00019	2.99229	2.98522	2.97889	2.97325	2.96826	2.96385	2.96	2.95665	2.95379	2.95137	2.94937
CSys (µg/mL)	134	1	0	8.59115	10.5304	9.49493	6.99286	5.75584	4.77687	3.99926	3.99926	3.64566	3.36384	3.13815	2.9567	2.81028	2.69169	2.59527	2.51655	2.45199	2.3988	2.35474	2.31806	2.28733	2.26145	2.2395	2.22078	2.20472	2.19085	2.1788	2.16828	2.15904	2.1509	2.14368	2.13727	2.13156	2.12645	2.12189	2.1178	2.11413	2.11086	2.10793	2.10531	2.10299	2.10093	2.09913	2.09754	2.09618	2.09501
CSys (µg/mL)	135	1	0	8.61256	10.6869	10.1045	7.63805	6.38592	5.37739	4.56388	4.56388	4.17973	3.8713	3.62258	3.4212	3.25751	3.12392	3.0145	2.92452	2.85024	2.78867	2.73743	2.69459	2.65862	2.62828	2.60257	2.58068	2.56195	2.54586	2.53198	2.51994	2.50947	2.50032	2.49231	2.48528	2.4791	2.47366	2.46886	2.46464	2.46093	2.45767	2.45483	2.45236	2.45023	2.44841	2.44687	2.44561	2.44458	2.44379
CSys (µg/mL)	136	1	0	10.1291	12.4447	11.3419	8.47377	7.03419	5.88087	4.95348	4.95348	4.51831	4.16717	3.88284	3.652	3.46419	3.31109	3.18606	3.08374	2.99986	2.93094	2.87418	2.82734	2.78858	2.75642	2.72967	2.70735	2.68867	2.673	2.65981	2.64868	2.63927	2.63129	2.62451	2.61874	2.61384	2.60967	2.60613	2.60314	2.60062	2.59851	2.59676	2.59534	2.59421	2.59334	2.5927	2.59228	2.59205	2.592
CSys (µg/mL)	137	1	0	8.57037	10.8162	10.5446	7.64606	6.24077	5.14223	4.27893	4.27893	3.89675	3.59366	3.35232	3.1595	3.0049	2.88049	2.77995	2.69834	2.63176	2.57714	2.53208	2.49467	2.46342	2.43713	2.41487	2.39589	2.37961	2.36556	2.35336	2.3427	2.33336	2.32513	2.31785	2.31141	2.30568	2.3006	2.29607	2.29205	2.28849	2.28533	2.28254	2.2801	2.27797	2.27612	2.27455	2.27322	2.27212	2.27123
CSys (µg/mL)	138	1	0	10.5551	13.0458	11.6347	8.12616	6.48543	5.23765	4.28248	4.28248	3.89922	3.60166	3.36949	3.18775	3.04511	2.93284	2.8442	2.77396	2.71806	2.67336	2.63741	2.60834	2.58467	2.56526	2.54923	2.5359	2.52473	2.5153	2.50729	2.50045	2.49456	2.48949	2.48509	2.48127	2.47796	2.47508	2.47259	2.47045	2.46861	2.46705	2.46574	2.46466	2.4638	2.46314	2.46267	2.46236	2.46222	2.46223
CSys (µg/mL)	139	1	0	8.22222	10.1065	9.20514	6.85064	5.6649	4.71608	3.95604	3.95604	3.60089	3.31771	3.09109	2.90911	2.76252	2.64411	2.54823	2.47041	2.40713	2.35557	2.31351	2.27914	2.25103	2.22802	2.20917	2.19371	2.18104	2.17066	2.16217	2.15522	2.14955	2.14495	2.14123	2.13825	2.13589	2.13405	2.13264	2.13161	2.13089	2.13045	2.13024	2.13024	2.13041	2.13074	2.13122	2.13181	2.13252	2.13333
CSys (µg/mL)	140	1	0	11.16	13.7541	12.5737	9.42153	7.83283	6.5547	5.52218	5.52218	5.03332	4.63629	4.31291	4.04908	3.83359	3.65744	3.51337	3.39549	3.29901	3.22003	3.15537	3.10245	3.05913	3.0237	2.99474	2.9711	2.95182	2.93614	2.92342	2.91314	2.90488	2.89828	2.89307	2.889	2.88589	2.88357	2.88192	2.88083	2.88021	2.87999	2.8801	2.8805	2.88116	2.88202	2.88307	2.88428	2.88564	2.88712
CSys (µg/mL)	141	1	0	10.7696	13.2259	11.846	8.62442	7.04093	5.79156	4.80146	4.80146	4.35295	3.99493	3.70822	3.47814	3.29327	3.14457	3.02488	2.92846	2.85074	2.78807	2.7375	2.69668	2.66373	2.63712	2.61564	2.59831	2.58434	2.57309	2.56405	2.55682	2.55105	2.54649	2.54292	2.54016	2.53807	2.53654	2.53548	2.53481	2.53447	2.53441	2.53459	2.53497	2.53554	2.53626	2.53713	2.53811	2.5392	2.5404
CSys (µg/mL)	142	1	0	10.0543	12.4215	11.6144	8.98073	7.61475	6.49317	5.5699	5.5699	5.11649	4.74352	4.43589	4.18157	3.97088	3.79599	3.6505	3.5292	3.42783	3.34291	3.27158	3.21149	3.16073	3.11771	3.08113	3.04991	3.02319	3.00022	2.98041	2.96327	2.94837	2.93538	2.92402	2.91405	2.90527	2.89753	2.89068	2.88462	2.87924	2.87447	2.87023	2.86647	2.86314	2.86019	2.85759	2.85531	2.85332	2.8516
CSys (µg/mL)	143	1	0	10.3246	12.6116	11.0631	7.83511	6.29067	5.09647	4.16807	4.16807	3.76874	3.45472	3.20676	3.01053	2.85502	2.73166	2.63373	2.55593	2.49409	2.4449	2.40575	2.37455	2.34968	2.32984	2.314	2.30134	2.29123	2.28315	2.2767	2.27155	2.26746	2.26422	2.26166	2.25967	2.25813	2.25697	2.25613	2.25555	2.25518	2.25501	2.25499	2.25511	2.25535	2.25569	2.25613	2.25666	2.25726	2.25792
CSys (µg/mL)	144	1	0	10.119	12.5871	12.0026	9.16649	7.70799	6.52059	5.5523	5.5523	5.0825	4.7005	4.38876	4.13356	3.92404	3.75157	3.60924	3.49149	3.39383	3.31265	3.24497	3.18842	3.14102	3.10119	3.06761	3.03921	3.01512	2.99462	2.97711	2.96211	2.94922	2.9381	2.92848	2.92014	2.91289	2.90658	2.90107	2.89625	2.89205	2.88837	2.88517	2.88238	2.87996	2.87787	2.87608	2.87457	2.8733	2.87226
CSys (µg/mL)	145	1	0	11.2335	13.8572	12.7601	9.63328	8.03618	6.74332	5.69531	5.69531	5.19284	4.78668	4.4572	4.18908	3.97026	3.79124	3.64445	3.52386	3.42461	3.34279	3.27525	3.21942	3.17322	3.13494	3.10319	3.07684	3.05495	3.03677	3.02165	3.00909	2.99866	2.99001	2.98284	2.97693	2.97207	2.9681	2.96488	2.96231	2.96029	2.95875	2.95761	2.95683	2.95635	2.95615	2.9562	2.95645	2.9569	2.95752
CSys (µg/mL)	146	1	0	9.43562	11.7296	10.97	8.50183	7.2119	6.14782	5.26842	5.26842	4.83546	4.47813	4.18227	3.93669	3.73243	3.56224	3.42027	3.30172	3.20264	3.11978	3.05046	2.99245	2.94391	2.90328	2.86929	2.84087	2.81712	2.7973	2.78077	2.76702	2.7556	2.74615	2.73835	2.73196	2.72675	2.72255	2.71919	2.71655	2.71452	2.71301	2.71195	2.71127	2.71091	2.71083	2.71099	2.71137	2.71192	2.71263
CSys (µg/mL)	147	1	0	9.79509	12.0771	10.8695	7.66848	6.14345	4.97565	4.08019	4.08019	3.7119	3.43102	3.21511	3.04776	2.91688	2.81354	2.73111	2.66468	2.61054	2.56594	2.52878	2.49749	2.47087	2.44799	2.42815	2.41081	2.39554	2.38202	2.36997	2.3592	2.34954	2.34086	2.33304	2.32599	2.31964	2.31393	2.30879	2.30419	2.30008	2.29643	2.29319	2.29035	2.28788	2.28574	2.28393	2.28242	2.28118	2.28021
CSys (µg/mL)	148	1	0	8.18313	10.3205	10.0753	7.33141	6.00315	4.96617	4.15209	4.15209	3.79455	3.5113	3.28573	3.10526	2.9602	2.84299	2.74775	2.66989	2.60583	2.55275	2.50845	2.47121	2.43967	2.41276	2.38964	2.36963	2.35221	2.33695	2.32352	2.31163	2.30108	2.29168	2.28328	2.27577	2.26904	2.263	2.2576	2.25277	2.24845	2.24459	2.24118	2.23815	2.23549	2.23317	2.23116	2.22944	2.22799	2.22679
CSys (µg/mL)	149	1	0	8.76419	10.9799	10.5669	7.73537	6.34757	5.25741	4.39783	4.39783	4.01302	3.70861	3.46636	3.27261	3.11699	2.99151	2.88993	2.80739	2.74003	2.68483	2.63939	2.60179	2.57051	2.54436	2.52236	2.50376	2.48793	2.47438	2.46273	2.45265	2.4439	2.43626	2.42957	2.42369	2.41851	2.41395	2.40993	2.40639	2.40327	2.40053	2.39814	2.39607	2.39428	2.39276	2.39149	2.39044	2.38961	2.38897
CSys (µg/mL)	150	1	0	8.93006	11.2044	10.8342	8.01475	6.60861	5.48987	4.59732	3.88268	3.60829	3.38797	3.21015	3.06605	2.94891	2.85341	2.77532	2.7113	2.65865	2.6152	2.57923	2.54933	2.52439	2.50349	2.4859	2.47103	2.4584	2.44763	2.4384	2.43046	2.42361	2.41766	2.4125	2.408	2.40407	2.40063	2.39763	2.39502	2.39274	2.39076	2.38906	2.3876	2.38636	2.38532	2.38448	2.3838	2.38329	2.38292
CSys (µg/mL)	151	1	0	10.3089	15.4651	12.4944	8.72664	6.95254	5.59472	4.54929	4.54929	4.11324	3.77287	3.5067	3.29839	3.13522	3.00729	2.90687	2.82793	2.76578	2.71675	2.67799	2.64729	2.6229	2.60348	2.58798	2.57557	2.56562	2.55763	2.55121	2.54604	2.54189	2.53858	2.53595	2.53388	2.5323	2.53111	2.53027	2.52972	2.52943	2.52937	2.52951	2.52984	2.53033	2.53098	2.53176	2.53267	2.5337	2.53484
CSys (µg/mL)	152	1	0	9.6537	12.0929	11.4268	8.58685	7.1521	5.99634	5.06207	5.06207	4.62377	4.26855	3.97996	3.7451	3.5537	3.39751	3.26989	3.16549	3.07998	3.00985	2.95226	2.9049	2.86592	2.83379	2.80728	2.78537	2.76726	2.75228	2.73988	2.72962	2.72115	2.71415	2.7084	2.70369	2.69986	2.69677	2.69432	2.69241	2.69098	2.68995	2.68927	2.68891	2.68882	2.68898	2.68935	2.68993	2.69068	2.69159
CSys (µg/mL)	153	1	0	10.358	12.9861	12.4298	8.97442	7.29963	5.99613	4.97814	4.97814	4.53371	4.18571	3.91136	3.69373	3.5201	3.38076	3.26826	3.17686	3.10211	3.04056	2.9895	2.94683	2.91091	2.88044	2.8544	2.83199	2.81258	2.79566	2.78083	2.76777	2.75623	2.74599	2.73688	2.72878	2.72155	2.71512	2.70939	2.70431	2.6998	2.69584	2.69236	2.68934	2.68673	2.68452	2.68267	2.68115	2.67995	2.67905
CSys (µg/mL)	154	1	0	9.31611	11.6779	11.1163	7.94089	6.40802	5.21321	4.27701	4.27701	3.86102	3.53153	3.27004	3.06232	2.89727	2.76608	2.6618	2.57891	2.51304	2.4607	2.41914	2.38617	2.36004	2.33937	2.32305	2.31021	2.30016	2.29234	2.28631	2.28172	2.27828	2.27579	2.27405	2.27292	2.2723	2.27209	2.27222	2.27263	2.27328	2.27412	2.27513	2.27629	2.27756	2.27894	2.28041	2.28197	2.28359	2.28529
CSys (µg/mL)	155	1	0	8.79538	10.947	10.3172	7.75818	6.46719	5.42864	4.59018	4.59018	4.19508	3.87528	3.61558	3.40418	3.23171	3.0907	2.97515	2.88025	2.8021	2.73758	2.68415	2.63977	2.60278	2.57184	2.54586	2.52396	2.50542	2.48967	2.47623	2.4647	2.45478	2.44621	2.43878	2.43231	2.42666	2.42173	2.4174	2.4136	2.41026	2.40734	2.40477	2.40253	2.40058	2.39889	2.39744	2.39621	2.39517	2.39432
CSys (µg/mL)	156	1	0	12.4441	15.3551	14.1923	10.4042	8.53034	7.05341	5.88872	5.88872	5.36481	4.95485	4.63226	4.37683	4.17312	4.00936	3.87657	3.76789	3.67807	3.60308	3.53982	3.48591	3.43953	3.39923	3.36391	3.33271	3.30495	3.28008	3.2577	3.23744	3.21904	3.20228	3.18696	3.17294	3.16009	3.14829	3.13747	3.12753	3.1184	3.11003	3.10235	3.09532	3.0889	3.08304	3.0777	3.07285	3.06846	3.0645
CSys (µg/mL)	157	1	0	8.9717	11.1142	10.4233	8.08358	6.86548	5.86191	5.03289	5.03289	4.62388	4.2861	4.00656	3.77488	3.58263	3.42296	3.29022	3.17978	3.08784	3.01125	2.9474	2.89415	2.84973	2.81266	2.78171	2.75589	2.73434	2.71637	2.7014	2.68895	2.67861	2.67006	2.66301	2.65723	2.65253	2.64874	2.64574	2.64341	2.64165	2.64038	2.63954	2.63907	2.63893	2.63906	2.63945	2.64006	2.64086	2.64184
CSys (µg/mL)	158	1	0	6.3502	10.4203	9.75166	7.85582	6.83183	5.96487	5.22981	5.22981	4.85294	4.53475	4.26561	4.0376	3.84418	3.67986	3.54007	3.42096	3.31932	3.23243	3.15804	3.09421	3.03934	2.99208	2.95129	2.91599	2.88537	2.85875	2.83555	2.81528	2.79751	2.78191	2.76816	2.75603	2.74528	2.73575	2.72727	2.71972	2.71297	2.70694	2.70154	2.6967	2.69235	2.68845	2.68495	2.68181	2.679	2.67649
CSys (µg/mL)	159	1	0	8.78296	14.1263	13.2382	10.6623	9.15403	7.90029	6.85574	5.98337	5.6275	5.32006	5.03369	4.79426	4.59365	4.42522	4.28346	4.16387	4.06271	3.9769	3.9039	3.8416	3.78828	3.74249	3.70303	3.66893	3.63937	3.61365	3.59121	3.57159	3.55437	3.53924	3.52592	3.51417	3.50379	3.49463	3.48653	3.47939	3.47309	3.46755	3.4627	3.45847	3.4548	3.45165	3.44896	3.44671	3.44486	3.44338
CSys (µg/mL)	160	1	0	9.2419	11.3495	10.1814	7.15775	5.71162	4.59885	3.74042	3.74042	3.37423	3.09106	2.87072	2.69835	2.56289	2.45604	2.37151	2.30446	2.25118	2.20878	2.175	2.14806	2.12657	2.10944	2.09577	2.0849	2.07625	2.06939	2.06398	2.05974	2.05643	2.05389	2.05197	2.05057	2.04958	2.04893	2.04857	2.04845	2.04854	2.04879	2.04919	2.04972	2.05035	2.05109	2.0519	2.0528	2.05376	2.05478
CSys (µg/mL)	161	1	0	10.6687	13.0544	11.2838	7.58355	5.9217	4.6969	3.78703	3.78703	3.45943	3.21027	3.01877	2.87042	2.75465	2.66362	2.59145	2.5337	2.48703	2.4489	2.41739	2.39107	2.36882	2.34981	2.33341	2.31912	2.30658	2.29549	2.28562	2.27681	2.26891	2.26181	2.25541	2.24964	2.24444	2.23975	2.23553	2.23175	2.22836	2.22534	2.22266	2.22029	2.21822	2.21642	2.21488	2.21358	2.2125	2.21162
CSys (µg/mL)	162	1	0	10.1764	12.787	12.2635	8.71327	7.02265	5.72228	4.71706	4.71706	4.29062	3.95813	3.69716	3.49124	3.32805	3.1982	3.09445	3.0112	2.94408	2.8897	2.84539	2.80907	2.77911	2.75424	2.73345	2.71596	2.70114	2.6885	2.67766	2.66832	2.66022	2.65318	2.64703	2.64167	2.63697	2.63286	2.62928	2.62617	2.62347	2.62116	2.6192	2.61755	2.6162	2.61513	2.61431	2.61372	2.61336	2.61321
CSys (µg/mL)	163	1	0	8.87372	11.1566	10.7313	8.23985	6.94665	5.88408	5.00863	5.00863	4.57738	4.22126	3.92636	3.68167	3.47837	3.30933	3.1687	3.05168	2.95431	2.87334	2.80603	2.75015	2.70381	2.66545	2.63377	2.60768	2.58627	2.56879	2.55459	2.54315	2.53401	2.52682	2.52125	2.51704	2.51397	2.51187	2.51057	2.50994	2.50989	2.51031	2.51114	2.5123	2.51374	2.51543	2.51731	2.51937	2.52156	2.52388
CSys (µg/mL)	164	1	0	9.86694	12.0769	10.8042	7.87111	6.43215	5.29802	4.39973	4.39973	3.99213	3.66657	3.40561	3.19604	3.02758	2.89208	2.78308	2.69539	2.62487	2.56817	2.52262	2.48606	2.45675	2.4333	2.41457	2.39967	2.38786	2.37856	2.37129	2.36567	2.36139	2.35821	2.35591	2.35434	2.35337	2.35289	2.35282	2.35309	2.35363	2.35441	2.35539	2.35653	2.35782	2.35923	2.36074	2.36235	2.36403	2.36579
CSys (µg/mL)	165	1	0	9.49287	11.9355	11.4685	8.1663	6.59194	5.38019	4.44292	4.44292	4.0452	3.73498	3.49118	3.29839	3.14508	3.02251	2.92397	2.84428	2.77943	2.72631	2.68247	2.64604	2.61551	2.58975	2.56782	2.54903	2.5328	2.51869	2.50634	2.49548	2.48588	2.47735	2.46976	2.46298	2.45692	2.45149	2.44663	2.44228	2.4384	2.43493	2.43185	2.42913	2.42674	2.42465	2.42284	2.4213	2.42	2.41893
CSys (µg/mL)	166	1	0	8.82021	11.058	10.7394	8.38753	7.15669	6.14064	5.30052	5.30052	4.88815	4.54863	4.26818	4.03589	3.84298	3.68238	3.54834	3.4362	3.34214	3.26303	3.19632	3.1399	3.09203	3.05131	3.01654	2.98677	2.96118	2.93913	2.92005	2.90349	2.88908	2.8765	2.86548	2.85582	2.84732	2.83983	2.83323	2.8274	2.82226	2.81773	2.81374	2.81023	2.80716	2.80448	2.80216	2.80017	2.79848	2.79707
CSys (µg/mL)	167	1	0	9.28925	11.6811	11.4172	8.56843	7.12591	5.96364	5.02431	4.2625	3.95371	3.70239	3.49714	3.32919	3.19163	3.0789	2.98651	2.91082	2.84883	2.79809	2.75662	2.72275	2.69515	2.67271	2.65452	2.63983	2.62804	2.61865	2.61123	2.60544	2.60102	2.59773	2.59537	2.59381	2.59289	2.59253	2.59263	2.59313	2.59395	2.59506	2.59641	2.59797	2.5997	2.6016	2.60363	2.60577	2.60803	2.61037
CSys (µg/mL)	168	1	0	11.3488	13.8565	12.0248	8.38483	6.66828	5.35455	4.3429	4.3429	3.92177	3.59261	3.33435	3.13141	2.97184	2.84639	2.74779	2.67034	2.60953	2.56185	2.52449	2.49528	2.47249	2.45476	2.44102	2.43044	2.42235	2.41624	2.41169	2.40839	2.40607	2.40455	2.40366	2.40327	2.4033	2.40366	2.4043	2.40515	2.40619	2.40739	2.40871	2.41015	2.41168	2.41328	2.41496	2.41671	2.4185	2.42035
CSys (µg/mL)	169	1	0	9.46131	11.8669	11.3583	8.69085	7.32139	6.20448	5.29059	5.29059	4.85072	4.49026	4.19417	3.95054	3.7498	3.58416	3.44731	3.33411	3.24033	3.16255	3.09794	3.0442	2.99943	2.96209	2.93088	2.90477	2.8829	2.86454	2.84912	2.83615	2.82523	2.81604	2.8083	2.8018	2.79633	2.79176	2.78794	2.78478	2.78218	2.78007	2.77838	2.77708	2.7761	2.77541	2.77499	2.77481	2.77483	2.77505
CSys (µg/mL)	170	1	0	9.84008	12.1299	11.1373	8.39735	7.00962	5.88984	4.98306	4.98306	4.55211	4.2021	3.91694	3.68412	3.49369	3.3377	3.20974	3.10462	3.01815	2.94693	2.88817	2.83963	2.79948	2.76622	2.73863	2.71571	2.69667	2.68082	2.66762	2.65663	2.64749	2.63989	2.63359	2.62838	2.6241	2.62061	2.61779	2.61555	2.61382	2.61252	2.61161	2.61103	2.61075	2.61074	2.61096	2.61139	2.61202	2.61282
CSys (µg/mL)	171	1	0	8.40397	10.6758	10.7763	8.25574	6.96282	5.90953	5.04901	5.04901	4.63237	4.29198	4.0132	3.78433	3.59602	3.44068	3.31222	3.20568	3.11706	3.04309	2.98115	2.92908	2.88516	2.84794	2.81629	2.78926	2.76607	2.7461	2.72883	2.71384	2.70077	2.68935	2.67933	2.67052	2.66276	2.65591	2.64985	2.64451	2.63978	2.63562	2.63195	2.62873	2.62592	2.62348	2.62139	2.6196	2.6181	2.61686
CSys (µg/mL)	172	1	0	11.4284	14.1779	12.7901	8.5701	6.65957	5.23832	4.17264	4.17264	3.76633	3.45448	3.21487	3.03096	2.89002	2.78216	2.69975	2.63686	2.58895	2.55252	2.52488	2.50397	2.48824	2.47648	2.46776	2.46139	2.45683	2.45368	2.45161	2.45039	2.44983	2.4498	2.45018	2.4509	2.45189	2.45309	2.45448	2.45602	2.45768	2.45946	2.46133	2.46329	2.46533	2.46743	2.46959	2.47181	2.47409	2.47641
CSys (µg/mL)	173	1	0	8.6012	10.7925	10.407	7.57971	6.18754	5.08834	4.21667	4.21667	3.81507	3.49405	3.23636	3.02893	2.86165	2.72659	2.61747	2.52927	2.45796	2.40029	2.35367	2.31599	2.28554	2.26096	2.24113	2.22515	2.21231	2.202	2.19375	2.18718	2.18198	2.17788	2.1747	2.17225	2.17041	2.16907	2.16813	2.16753	2.16721	2.16711	2.16721	2.16747	2.16786	2.16837	2.16897	2.16965	2.1704	2.17122
CSys (µg/mL)	174	1	0	8.84277	11.0334	10.3933	7.3963	5.95984	4.84755	3.98193	3.98193	3.60576	3.31027	3.07729	2.89309	2.7471	2.63108	2.53862	2.46471	2.4054	2.35764	2.319	2.28759	2.26193	2.24085	2.22343	2.20895	2.19684	2.18665	2.17803	2.17069	2.16441	2.15901	2.15436	2.15034	2.14685	2.14382	2.1412	2.13894	2.13699	2.13532	2.13391	2.13272	2.13175	2.13097	2.13037	2.12994	2.12966	2.12952
CSys (µg/mL)	175	1	0	8.7286	11.0523	10.8983	7.99635	6.56898	5.44144	4.54675	4.54675	4.13971	3.81476	3.55456	3.3457	3.17765	3.04209	2.93244	2.84348	2.77107	2.71192	2.6634	2.62345	2.5904	2.56293	2.53998	2.52072	2.50447	2.49069	2.47895	2.4689	2.46026	2.45281	2.44636	2.44077	2.43591	2.43169	2.42803	2.42485	2.42211	2.41975	2.41775	2.41605	2.41464	2.4135	2.41259	2.41191	2.41143	2.41115
CSys (µg/mL)	176	1	0	8.38379	13.4972	12.0466	8.98073	7.44217	6.20879	5.21568	5.21568	4.7457	4.36465	4.05458	3.80175	3.59534	3.42675	3.28903	3.17656	3.08475	3.00989	2.9489	2.89931	2.85906	2.82649	2.80021	2.77911	2.76227	2.74891	2.73843	2.73032	2.72415	2.71958	2.71634	2.71418	2.71293	2.71242	2.71252	2.71313	2.71416	2.71555	2.71722	2.71914	2.72127	2.72356	2.726	2.72856	2.73122	2.73397
CSys (µg/mL)	177	1	0	7.28676	9.11286	8.68048	6.60837	5.55633	4.70893	4.02517	4.02517	3.70917	3.45568	3.25121	3.08538	2.95014	2.83923	2.74772	2.67176	2.60831	2.55496	2.50981	2.47135	2.43836	2.40989	2.38517	2.36358	2.34462	2.32789	2.31307	2.29988	2.28811	2.27759	2.26816	2.2597	2.2521	2.24528	2.23917	2.2337	2.22882	2.22447	2.22062	2.21722	2.21425	2.21168	2.20947	2.2076	2.20606	2.20482
CSys (µg/mL)	178	1	0	6.77364	8.4588	8.11647	6.23928	5.26716	4.471	3.81773	3.81773	3.49775	3.23569	3.02038	2.84302	2.69661	2.57552	2.47519	2.39194	2.32276	2.26519	2.21721	2.17718	2.14372	2.11572	2.09226	2.07257	2.05602	2.0421	2.03036	2.02046	2.0121	2.00504	1.99906	1.994	1.98972	1.98611	1.98306	1.9805	1.97835	1.97655	1.97507	1.97387	1.97289	1.97213	1.97155	1.97114	1.97087	1.97074
CSys (µg/mL)	179	1	0	8.77338	13.3722	11.1563	7.98125	6.43542	5.23784	4.30559	3.57644	3.32625	3.12785	2.97013	2.84449	2.74416	2.66384	2.5993	2.54726	2.50512	2.47083	2.4428	2.41975	2.4007	2.38487	2.37163	2.36052	2.35113	2.34317	2.3364	2.33063	2.3257	2.32148	2.31788	2.31483	2.31224	2.31007	2.30827	2.30681	2.30565	2.30477	2.30414	2.30375	2.30357	2.30358	2.30379	2.30417	2.30471	2.3054
CSys (µg/mL)	180	1	0	9.87676	12.1965	11.1726	8.36949	6.95164	5.81199	4.89411	4.89411	4.46285	4.11584	3.83539	3.60793	3.42289	3.27199	3.1487	3.04781	2.96516	2.8974	2.84181	2.79619	2.75877	2.72806	2.7029	2.68229	2.66543	2.65167	2.64048	2.6314	2.62408	2.61821	2.61355	2.60989	2.60707	2.60495	2.60342	2.60238	2.60175	2.60148	2.6015	2.60177	2.60226	2.60294	2.60378	2.60476	2.60586	2.60707
CSys (µg/mL)	181	1	0	8.03194	9.91535	9.1185	6.87492	5.73736	4.82312	4.08808	4.08808	3.74685	3.47504	3.25771	3.08324	2.94257	2.82864	2.73591	2.66006	2.59767	2.54607	2.50313	2.46718	2.4369	2.41123	2.38932	2.37052	2.35427	2.34016	2.32784	2.31701	2.30747	2.29902	2.29152	2.28484	2.27888	2.27355	2.26879	2.26453	2.26073	2.25735	2.25434	2.25168	2.24933	2.24729	2.24551	2.244	2.24272	2.24166
CSys (µg/mL)	182	1	0	7.48413	9.44105	9.35735	7.1338	5.99817	5.07502	4.32177	4.32177	3.95653	3.65755	3.41223	3.21058	3.04459	2.90775	2.79479	2.7014	2.62409	2.55998	2.50674	2.46246	2.42556	2.39476	2.36901	2.34744	2.32934	2.31414	2.30134	2.29056	2.28146	2.27379	2.26732	2.26186	2.25726	2.2534	2.25018	2.2475	2.2453	2.2435	2.24208	2.24097	2.24014	2.23957	2.23922	2.23908	2.23912	2.23933
CSys (µg/mL)	183	1	0	8.72132	10.7672	9.97978	7.62003	6.40806	5.4195	4.61053	4.61053	4.21624	3.89279	3.62678	3.40763	3.22686	3.07759	2.95421	2.85216	2.76769	2.69773	2.63974	2.59167	2.55179	2.51869	2.49122	2.46842	2.4495	2.4338	2.42078	2.41	2.40108	2.39373	2.38768	2.38273	2.3787	2.37545	2.37285	2.37082	2.36926	2.36811	2.3673	2.36679	2.36655	2.36653	2.3667	2.36706	2.36756	2.3682
CSys (µg/mL)	184	1	0	9.93836	12.4212	11.8516	8.66551	7.09708	5.86096	4.88321	4.1064	3.81877	3.58869	3.40364	3.25429	3.13352	3.03571	2.95644	2.89216	2.84	2.79765	2.76326	2.73532	2.71261	2.69416	2.67917	2.667	2.65713	2.64914	2.6427	2.63753	2.63342	2.63017	2.62766	2.62575	2.62436	2.6234	2.62281	2.62255	2.62256	2.62281	2.62327	2.62392	2.62474	2.62571	2.62681	2.62804	2.62938	2.63082
CSys (µg/mL)	185	1	0	9.49929	11.6611	10.5481	7.79016	6.41491	5.31852	4.4412	4.4412	4.032	3.70297	3.43755	3.22296	3.04918	2.90823	2.79376	2.70069	2.62492	2.56315	2.51274	2.47154	2.43783	2.4102	2.38753	2.3689	2.35357	2.34094	2.33053	2.32193	2.31482	2.30896	2.30411	2.30012	2.29683	2.29414	2.29196	2.29019	2.28879	2.2877	2.28687	2.28628	2.28589	2.28567	2.28562	2.28571	2.28592	2.28625
CSys (µg/mL)	186	1	0	9.32219	11.6025	11.1619	8.63277	7.31795	6.23923	5.35335	5.35335	4.91852	4.56347	4.2726	4.03354	3.83641	3.67331	3.53788	3.42502	3.33058	3.25125	3.18431	3.12756	3.07923	3.03787	3.00229	2.97153	2.9448	2.92145	2.90096	2.88288	2.86686	2.85261	2.83987	2.82845	2.81817	2.8089	2.80051	2.79291	2.786	2.77973	2.77403	2.76883	2.76411	2.75982	2.75592	2.75239	2.74919	2.74631
CSys (µg/mL)	187	1	0	10.2829	12.767	11.7681	8.13142	6.41974	5.11473	4.11438	3.34288	3.0937	2.8968	2.74027	2.61558	2.51624	2.43721	2.37449	2.32485	2.28569	2.25492	2.23086	2.21215	2.1977	2.18664	2.17828	2.17206	2.16755	2.16439	2.1623	2.16106	2.16049	2.16046	2.16085	2.16157	2.16255	2.16375	2.16511	2.16659	2.16818	2.16985	2.17158	2.17335	2.17517	2.17701	2.17887	2.18074	2.18262	2.18451
CSys (µg/mL)	188	1	0	4.81424	8.14146	8.05812	6.658	5.77365	5.0106	4.37312	3.83921	3.50348	3.31191	3.15115	3.01572	2.90116	2.80382	2.72072	2.64942	2.58794	2.53464	2.48819	2.44751	2.4117	2.38001	2.35185	2.32671	2.30418	2.2839	2.2656	2.24902	2.23398	2.22029	2.2078	2.19641	2.18599	2.17645	2.16772	2.15973	2.1524	2.1457	2.13957	2.13396	2.12884	2.12417	2.11992	2.11606	2.11256	2.1094
CSys (µg/mL)	189	1	0	11.6962	14.4564	13.2686	9.61225	7.8147	6.40024	5.28393	5.28393	4.77778	4.37677	4.05745	3.80216	3.59744	3.43291	3.30046	3.19374	3.10768	3.03829	2.98233	2.93724	2.90095	2.87177	2.84836	2.82964	2.81471	2.80286	2.79352	2.78621	2.78057	2.77627	2.77308	2.77078	2.76922	2.76826	2.76779	2.76773	2.768	2.76855	2.76933	2.7703	2.77143	2.77269	2.77407	2.77554	2.77709	2.77871
CSys (µg/mL)	190	1	0	8.91155	11.1703	10.7345	7.90734	6.50044	5.38315	4.49342	3.78233	3.51094	3.29312	3.11728	2.97467	2.8586	2.76379	2.68612	2.62227	2.56961	2.52602	2.48979	2.45957	2.43423	2.4129	2.39484	2.37948	2.36634	2.35504	2.34527	2.33677	2.32935	2.32283	2.31708	2.31199	2.30746	2.30342	2.2998	2.29655	2.29363	2.29101	2.28864	2.28651	2.2846	2.28288	2.28133	2.27996	2.27873	2.27764
CSys (µg/mL)	191	1	0	9.72045	12.1149	11.5254	8.78877	7.40019	6.27937	5.37177	5.37177	4.94672	4.60264	4.32269	4.09382	3.90576	3.75042	3.62139	3.51356	3.4229	3.34617	3.28082	3.22478	3.17641	3.13441	3.0977	3.06544	3.03694	3.01163	2.98907	2.96887	2.95073	2.93439	2.91964	2.90631	2.89424	2.88331	2.8734	2.86443	2.85631	2.84896	2.84233	2.83636	2.831	2.8262	2.82193	2.81814	2.81481	2.81189
CSys (µg/mL)	192	1	0	9.34684	11.7167	12.1408	10.2415	9.01806	7.82111	6.80871	5.95073	5.41206	5.07271	4.77368	4.52031	4.30551	4.12334	3.96879	3.83765	3.72637	3.63193	3.55179	3.48381	3.42617	3.37732	3.33597	3.30099	3.27146	3.24656	3.22563	3.20809	3.19345	3.18128	3.17124	3.16303	3.15638	3.15108	3.14694	3.1438	3.14152	3.14	3.13913	3.13882	3.139	3.13962	3.14061	3.14194	3.14355	3.14543
CSys (µg/mL)	193	1	0	12.3948	15.4027	13.9829	9.41258	7.334	5.79054	4.63742	4.63742	4.20154	3.87034	3.61643	3.42057	3.2688	3.1508	3.05878	2.98681	2.93034	2.88589	2.85076	2.82287	2.80062	2.78278	2.7684	2.75672	2.74719	2.73937	2.73291	2.72755	2.7231	2.71938	2.71627	2.71367	2.71152	2.70974	2.7083	2.70714	2.70624	2.70558	2.70512	2.70486	2.70478	2.70486	2.7051	2.70548	2.706	2.70664
CSys (µg/mL)	194	1	0	8.00627	10.07	9.92189	7.50049	6.27245	5.27988	4.47473	4.47473	4.08723	3.77195	3.51481	3.30473	3.13283	2.99199	2.87642	2.78146	2.70332	2.63893	2.58578	2.54184	2.50545	2.47527	2.4502	2.42934	2.41195	2.39743	2.3853	2.37516	2.36668	2.35958	2.35364	2.34869	2.34458	2.34117	2.33838	2.33611	2.33429	2.33287	2.3318	2.33103	2.33054	2.33029	2.33025	2.33042	2.33077	2.33127
CSys (µg/mL)	195	1	0	8.41541	10.5864	10.365	7.74625	6.43864	5.39765	4.56669	4.56669	4.18495	3.88057	3.63643	3.43952	3.27981	3.14956	3.04271	2.95452	2.88126	2.82	2.76843	2.72471	2.68738	2.6553	2.62754	2.60337	2.5822	2.56356	2.54706	2.53239	2.5193	2.50759	2.49708	2.48764	2.47914	2.47149	2.4646	2.4584	2.45283	2.44784	2.44338	2.43941	2.43588	2.43278	2.43006	2.42771	2.4257	2.424
CSys (µg/mL)	196	1	0	8.25364	13.1328	11.9841	9.22182	7.68585	6.45426	5.46286	4.66153	4.36696	4.11651	3.88597	3.69723	3.54207	3.41399	3.30775	3.2192	3.14498	3.08244	3.02943	2.98423	2.94545	2.91199	2.88294	2.85758	2.83532	2.81567	2.79826	2.78275	2.76889	2.75645	2.74527	2.73519	2.72608	2.71783	2.71037	2.7036	2.69747	2.69192	2.68689	2.68235	2.67825	2.67456	2.67125	2.66829	2.66565	2.66332
CSys (µg/mL)	197	1	0	6.44849	8.20765	8.4059	6.55436	5.58538	4.78329	4.11752	4.11752	3.78332	3.50578	3.2749	3.0826	2.92225	2.78841	2.67658	2.58306	2.50479	2.43921	2.38422	2.33808	2.29933	2.26676	2.23938	2.21634	2.19694	2.18061	2.16686	2.15528	2.14555	2.13737	2.13051	2.12477	2.11998	2.11602	2.11275	2.11009	2.10795	2.10626	2.10496	2.104	2.10334	2.10295	2.10279	2.10285	2.10308	2.10349
CSys (µg/mL)	198	1	0	11.2168	13.8387	12.4944	8.88207	7.15522	5.81999	4.78155	4.78155	4.33649	3.98638	3.70997	3.49135	3.31828	3.18119	3.07253	2.98638	2.91805	2.86384	2.82082	2.78669	2.7596	2.73813	2.72113	2.70769	2.69711	2.68882	2.68238	2.67742	2.67367	2.67091	2.66895	2.66767	2.66693	2.66666	2.66679	2.66724	2.66799	2.66898	2.67019	2.6716	2.67317	2.6749	2.67677	2.67877	2.68089	2.68311
CSys (µg/mL)	199	1	0	9.46097	11.5931	10.3041	7.42585	6.02551	4.92978	4.06863	4.06863	3.6871	3.38516	3.14531	2.95433	2.80198	2.68028	2.58291	2.50491	2.44235	2.39208	2.35165	2.31907	2.29277	2.27151	2.2543	2.24034	2.229	2.21977	2.21226	2.20615	2.20117	2.19712	2.19384	2.19119	2.18907	2.18739	2.18609	2.1851	2.18438	2.1839	2.18362	2.18352	2.18358	2.18378	2.1841	2.18455	2.18509	2.18574
CSys (µg/mL)	200	1	0	13.4326	16.4991	14.5636	10.0637	7.98933	6.43199	5.25518	5.25518	4.80173	4.45351	4.18309	3.97102	3.8031	3.66884	3.5604	3.47189	3.39886	3.33796	3.28662	3.24292	3.20535	3.17278	3.14432	3.11929	3.09715	3.07746	3.0599	3.04419	3.03011	3.01746	3.00611	2.99591	2.98676	2.97857	2.97124	2.96471	2.95891	2.95378	2.94927	2.94533	2.94191	2.93899	2.93652	2.93447	2.9328	2.9315
[truncated: 877 more columns]

[truncated: 3 more sheets: AUC0(Sub)(CPlasma), AUC2(Sub)(CPlasma), AUC]
