# Supplementary material for: The Impact of Low Cardiac Output on Propofol Pharmacokinetics across Age Groups—An Investigation Using Physiologically Based Pharmacokinetic Modelling
Source: Pharmaceutics. 2022 Sep 16;14(9):1957. doi: 10.3390/pharmaceutics14091957 (PMC9502676; doi:10.3390/pharmaceutics14091957)
Supplement: Supplementary file 1 [file pharmaceutics-14-01957-s001.zip › Propofol Paed Model 20% reduction cardiac output.xlsx]

## Sheet: Summary
Simcyp Population Based Simulator
2022-07-06 16:22:01
Simcyp Version 19 (19/12/2019)
Input Parameters
Output Parameters
Input Parameters
Workspace	Propofol_Retrogrademodel_OO_etal_NEW_Neonate
Substrate	Wsp-Propofol_retrograde_Cyp2B6
Simulation Mode	PKPD Parameters + PKPD Profiles
	Substrate				Substrate
Compound Name	Wsp-Propofol_retrograde_Cyp2B6
Mol Weight (g/mol)	178.3			Distribution Model	Full PBPK Model
log P	3.8			Vss	Predicted
Compound Type	Neutral			Prediction Method	Method 2
pKa 1	n/a
pKa 2	n/a			Clearance Type	Enzyme Kinetics
B/P	1.27689
Haematocrit	45
fu	script
Trial Design
					Substrate
Population Name	Sim-Paediatric			Prandial State	Fasted
Use Pop Representative	No			Route	Custom
Population Size	200
Number of Trials	1
No. of Subjects per Trial	200
Start Day/Time	Day 1, 09:00
End Day/Time	Day 1, 11:00
Study Duration (h)	2
Sampling Time	Pre-defined Uniform
Sampling Site Selection	Off
Output Parameters
PKPD Parameters	Mean	Median	Geometric mean	Confidence Interval		Can be found in Excel sheet
CL (L/h)	2.71251	2.5464	2.4743	2.35155	2.60346	Clearance Trials SS
CLpo (L/h)	5.56926	4.08735	4.40676	4.08717	4.75134	Clearance Trials SS
fa (Sub)	0.875448	0.92985	0.861937	0.843626	0.880645	Clearance Trials SS
Fg (Sub)	0.906451	0.916266	0.904615	0.897793	0.911489	Clearance Trials SS
Fh (Sub)	0.735225	0.762129	0.720102	0.701746	0.738937	Clearance Trials SS
F (Sub)	0.582277	0.584421	0.561478	0.542932	0.580658	Clearance Trials SS
Vss (Subs)(L/Kg)	11.3266	11.1426	11.2364	11.0722	11.4031	Distribution - Vols
PKPD Profiles	Mean	Median	Geometric mean	Confidence Interval		Can be found in Excel sheet
CMax (µg/mL)	19.9173	19.879	19.8573	19.6773	20.0389	AUC
TMax (h)	0.00446879	0.00443432	0.00446165	0.00443344	0.00449004	AUC
AUC (µg/mL.h)	0.206727	0.205817	0.206083	0.204184	0.207998	AUC
CMin (µg/mL)	0	0	n/a	n/a	n/a	AUC
CL (Dose/AUC)(L/h)	34.7345	34.831	34.3965	33.8349	34.9673	AUC

## Sheet: Input Sheet
Simcyp Population Based Simulator
2022-07-06 16:22:01
Simcyp Version 19 (19/12/2019)
Substrate			Trial Design			Simulation Toolbox			Software Version Detail
Compound Name	Wsp-Propofol_retrograde_Cyp2B6		Use Pop Representative	No		Random Number Generator	Mersenne Twister (MT19937)		Simulation Duration(seconds)	8
Version number	Not applicable		Population Size	200		Seed	Fixed		Windows Version	Windows 10
Molecule Type	Small Molecule		Number of Trials	1		Seed Value	1		Excel Version	Excel 2016
Route	Custom		No of Subjects per Trial	200		Sampling Site Selection	Off		Source File Location	C:\Program Files\Simcyp Simulator V19\Screens\
			Population name	Sim-Paediatric		Memory Size	4000000		Excel Embedded Workspace	No
PhysChem and Blood Binding			Version number	19.0 .0					Simcyp Version	19.0.96.0
			Minimum Age (years)	0		Paediatric Bins			Licence Details
Mol Weight (g/mol)	178.3		Maximum Age (years)	0.083		Age
log P	3.8		Propn. of Females	0.5		Bin 1	0.00 - 0.08		User name	AD\mbzoo
Compound Type	Neutral		Fix Individual Trial Design	No		Bin 2	0.08 - 2.00		Domain name	ad.nottingham.ac.uk
Extended Clearance Classification System	Class 2 - Metabolism		Prandial State	Fasted		Bin 3	2.00 - 6.00		Computer name	LUIN68894
BP input type	Predicted		PKPD Parameters	On		Bin 4	6.00 - 12.00		Simcyp Standard licence: agreement identifier
B/P	1.27689		PKPD Profiles	On		Bin 5	12.00 - 18.00		Simcyp Standard licence: agreement type	Academic teaching and research
Haematocrit	45		Start Day/Time	Day 1, 09:00		Bin 6	18.00 - 25.00		Simcyp Standard licence: organisation	University of Nottingham
fu Input	script		End Day/Time	Day 1, 11:00					Simcyp Standard licence: machine identifier	28C533CC-3119-11B2-A85C-E23748301C39
Reference Binding Component	HSA		Study Duration (h)	2		Body Weight			Simcyp Standard licence: source	Desktop
Protein Reference Conc (g/L)	45					Bin 1	0.00 - 4.50		Simcyp Standard licence: usage	Client
% Bound to Lipoprotein	0		Sub : Route	Custom		Bin 2	4.50 - 12.50		Simcyp Standard licence: issued	Mon Sep 13 10:15:46 2021
% Bound to Lipoprotein (CV %)	0					Bin 3	12.50 - 21.00		Simcyp Standard licence: valid from	Sun Sep 12 23:00:00 2021
			AUC Calculations (Substrate)			Bin 4	21.00 - 40.00		Simcyp Standard licence: valid to	Mon Sep 5 22:59:59 2022
Absorption			Calculated AUCt first dose	Yes		Bin 5	40.00 - 70.00		Simcyp Paediatric licence: agreement identifier
			Calculated AUC_INF	Yes		Bin 6	70.00 - 100.00		Simcyp Paediatric licence: agreement type	Academic teaching and research
			Calculated AUCt last dose	No					Simcyp Paediatric licence: organisation	University of Nottingham
Distribution			Integrated AUCt first dose	Yes		BSA			Simcyp Paediatric licence: machine identifier	28C533CC-3119-11B2-A85C-E23748301C39
			Integrated AUCt last dose	No		Bin 1	0.00 - 0.32		Simcyp Paediatric licence: source	Desktop
Distribution Model	Full PBPK Model		Integrated AUCt user interval	No		Bin 2	0.32 - 0.54		Simcyp Paediatric licence: usage	Client
Replacement Organ?	No		Method	Linear Trapezoidal		Bin 3	0.54 - 0.80		Simcyp Paediatric licence: issued	Mon Sep 13 10:15:46 2021
Organ Replaced	n/a		Weighting Option	Weighted by reciprocal of prediction squared (1/ŷ²)		Bin 4	0.80 - 1.25		Simcyp Paediatric licence: valid from	Sun Sep 12 23:00:00 2021
User-defined Additional Organ	No					Bin 5	1.25 - 1.70		Simcyp Paediatric licence: valid to	Mon Sep 5 22:59:59 2022
Type	n/a					Bin 6	1.70 - 3.00
Vss input type	Predicted
Vss (L/kg)	19.298
Prediction Method	Method 2					ODE Solver Settings
Concentration-dependent volume	No
log Po:w	3.8					No. Differential Equations	31
logP vo:w input type	Predicted					Solver sampling interval (h)	0.01
logP vo:w Prediction Method	Hansch					Solver sampling interval (h) (ADAM)	0.05
logP vo:w Hansch a	1.115					Sampling Time	Pre-defined Uniform
logP vo:w Hansch b	-1.35					Number of time samples	1000
logP vo:w	2.887
Compound Type	Neutral					Negative Cut-off	1e-08
Adipose input type	Predicted					Positive Cut-off	1e-20
Adipose	41.0299					Differential Solver	5th-order Runge-Kutta
Bone input type	Predicted					Maximum number of steps	1000000
Bone	31.5927					Relative Tolerance	1e-15
Brain input type	Predicted					Relative Tolerance when ADAM is used	1e-09
Brain	28.9084					Integration error tolerance	0.001
Gut input type	Predicted
Gut	22.8052					ADAM Model Specific Settings
Heart input type	Predicted
Heart	7.04977					Solubility Cap (mg/mL)	500
Kidney input type	Predicted					Use UBL fluid volumes	Off
Kidney	10.9071					Apply Minimum Mass Limit(ADAM)	Off
Liver input type	Predicted					Minimum Mass Limit	n/a
Liver	18.0392					Minimum Norm. Scalar (pH surface model)	1e-11
Lung input type	Predicted					Newton Convergence Tol (pH surface model)	1e-14
Lung	2.47542					Time Interval (pH surface model)	0.01
Muscle input type	Predicted					ConstDR (MBO Model)	10000
Muscle	11.075					Radius Rate Cap (PPB Model)(µm/h)	500
Skin input type	Predicted					Precipitation Delay Time (Sec)	0.001
Skin	13.5225					CR Cut-off (%)	99.9
Spleen input type	Predicted
Spleen	11.1114					LUA Scripting(ADAM)	Off
Pancreas input type	Predicted
Pancreas	18.6479
Kp Scalar	1.2
Smoothing Function	Off
Lipid Binding Scalar	1
Use Pvo:w for Neutral Lipid Partition in All Tissues	No
Elimination
Clearance Type	Enzyme Kinetics
FI Correction	Not used
PLR Correction	Not Used
In vitro metabolic system	Recombinant
Pathway	4-OH
Enzyme	CYP2B6
CLint (µL/min/pmol)	39.1841
fu mic	1
Pathway	4-OH
Enzyme	CYP2C9
Genotype	*1/*1
CLint (µL/min/pmol)	0.606
fu mic	1
In vitro metabolic system	Recombinant
Pathway	Pathway 1
Enzyme	UGT1A9
CLint (µL/min/mg protein)	360
fu mic	1
rUGTSystem	User
rUGTScalar - Liver	1
rUGTScalar - Intestine	1
rUGTScalar - Kidney	19.5
Feed formed renal metabolite into kidney	No
Use Allelic variants for Enzyme 1	No
Enzyme	CYP2C9
Use Allelic variants for Enzyme 2	No
Enzyme	CYP1A2
Gut Lumen metabolism	in-active
Ontogeny Profile	No Profile Used
Biliary CLint (Hep) (µL/min/106)	0
CV Biliary CLint (Hep) (%)	30
Ontogeny Profile	No Profile Used
Active enterohepatic recirculation for IV dose	No
Active Hepatic Scalar (Net)	1
CL R (L/h)	0
Transport
Organ/Tissue	Tumour
Tumour Permeability limited Model	Off

## Sheet: Ode State Info
Index	Model	State variable name (no PK interaction)
0	0	Substrate liver concentration
1	0	Substrate systemic concentration
2	0	Substrate adipose concentration
3	0	Substrate arterial blood concentration
4	0	Substrate bone concentration
5	0	Substrate brain concentration
6	0	Substrate heart concentration
7	0	Substrate gi tract (tissue) concentration
8	0	Substrate kidney concentration
9	0	Substrate lung concentration
10	0	Substrate muscle concentration
11	0	Substrate spleen concentration
12	0	Substrate skin concentration
13	0	Substrate additional organ concentration
14	0	Substrate pancreas concentration
15	0	Substrate lymph concentration
16	0	Substrate amount in dosed absorption compartment
17	0	Substrate renal amount excreted
18	0	Substrate feto-placental concentration
19	0	CYP2B6 amount in gut
20	0	CYP2B6 amount in colon
21	0	CYP2B6 amount in liver
22	0	CYP2B6 amount in kidney
23	0	CYP2C9 amount in gut
24	0	CYP2C9 amount in colon
25	0	CYP2C9 amount in liver
26	0	CYP2C9 amount in kidney
27	0	UGT1A9 amount in gut
28	0	UGT1A9 amount in colon
29	0	UGT1A9 amount in liver
30	0	UGT1A9 amount in kidney

## Sheet: Sim-Paediatric
Population		Population : Liver		Population : Kidney		Population : Skin		Population : GI Tract		Population : Lung		Population : Tissue Composition		Population : Blood		Population : Tissue Blood Flow Rates		Population : Brain		Population : Additional Organ		Population : FcRn IgG		Population : Lymph		Population : Target		Population : Tumour		Population : Female Reproductive System		Population : Paediatric
Ref Bodyweight (kg)	80.7056	Liver model	Well Stirred	Male Baseline 1	76.5	MechDermA - Forearm		Dep of Duod. on BSA:C1 Len	0.205	Ventillation-perfusion ratio: Mean	1	Tissue composition	Scripted	Haematocrit Mean : Male	Scripted	Tissue Blood Flow Rates	Scripted	CSF Flow		Additional Organ : EW (%)	14.1	IgG Concentration (µM)	80.7	% of total lymph flow (Adipose)	12.8	Target1 Name	TNF-alpha	Tumour : Volume (mL)	20	Vagina surface area (cm2)	87.5	Enzyme	CYP2B6
Maximum Age (years)	25	Liver weight : Slope vs BSA	0.722	Male Baseline 1 CV (%)	16.1	SCorneum Thickness (µm) : Male	15.7	Dep of Duod. on BSA:Exp Len	0.55	Ventillation-perfusion ratio: CV (%)	35	Adipose : IW (%)	3.9	Haematocrit CV (%) : Male	6.5			CSF production rate	Scripted	Additional Organ : IW (%)	3.9	IgG Concentration CV (%)	12.6	% of total lymph flow (Bone)	0	Target1 Rmax (µM)	0	Tumour : CV (%)	30	Vagina surface area CV (%)	9	Adult Max	1
Minimum Age (years)	0	Operational Concentrations	Liver Compartment (Outlet)	Male Age Cut-Off	61	SCorneum Thickness CV (%) : Male	33	Dep of Duod. on BSA:C1 Dia	0.033	Volume Airway (L): Mean	0.1	Adipose : AP (mg/g)	0.4	Haematocrit Mean : Female	Scripted			Bulk flow from brain to CSF (% CSF production)	25	Additional Organ : NL (%)	79	IgG KD (µM)	0.728	% of total lymph flow (Brain)	1.05	Target1 Rmax CV (%)	30	Tumour : Density (g/mL)	1	Cervix surface area (cm2)	16.9	Fbirth	0.277
Propn of Females	0.5	Liver weight	Script	Male Age Cut-off Baseline	81.2	SCorneum Thickness (µm) : Female	15.7	Dep of Duod. on BSA:Exp Dia	0.383	Volume Airway (L): CV (%)	30	Adipose : KpALB	0.037	Haematocrit CV (%) : Female	7.1			Bulk flow from brain to CSF (% CSF production) CV (%)	0	Additional Organ : NP (%)	0.2	IgG KD CV (%)	10	% of total lymph flow (Stomach and Oesophagus)	12	Target1 Kdeg (1/h)	0	Tumour : Weight (g)	20	Cervix surface area CV (%)	21	Age50 (X50)	1.537
BSA C1 Param	0.007184	Liver Volume Male CV (%)	0	Male Age Cut-Off CV1 (%)	27.4	SCorneum Thickness CV (%) : Female	34	Jej-Ileum Ratio:Jej Len	0.4	Volume Alveoli (L): Mean	5.6	Adipose : KpLPP	0.068	AGP Mean : Male	Scripted			CSF spinal absorption rate (%)	38	Additional Organ : AP (mg/g)	0.4	IgG KDcomplex (µM)	2.912	% of total lymph flow (Heart)	1	Target1 Kdeg CV (%)	30	Tumour : CV (%)	0	Vagina : cervix surface correlation coefficient	0	n(Agen)	1.73
BSA Wt Exp	0.425	Liver Volume Female CV (%)	0	Male Age Cut-Off CV2 (%)	21.2	SCorneum Fat (%) : Male	12.9	Enterocyte Volume (L)	0.517	Volume Alveoli (L): CV (%)	10	Bone : IW (%)	34.1	AGP CV (%) : Male	15			CSF spinal absorption rate CV (%)	0	Additional Organ : KpALB	0.037	IgG KDcomplex CV (%)	30	% of total lymph flow (Kidney)	8.5	Target1 Kshed (1/hr)	0	Tumour : Blood Flow (mL/min/mL tumour)	0.76	Epithelium thickness (mm)	1	Age-cap	25
BSA Ht Exp	0.725	Liver Volume Prediction Method	Default	Female Baseline 1	57	SCorneum Fat CV (%) : Male	30	Jej-Ileum Ratio:Jej/Duo Dia C1	0.8125	Volume Pulmonary Capilliary Blood (L): Mean	0.089	Bone : AP (mg/g)	0.67	AGP Mean : Female	Scripted			Bulk flow from spinal CSF to cranial CSF (% CSF spinal absorption rate)	90	Additional Organ : KpLPP	0.068	IgG CLcat,free (L/h)	0.0175	% of total lymph flow (Liver)	33	Target1 Kshed CV (%)	30	Tumour : CV (%)	30	Epithelium thickness CV (%)	40	Additional Function	No
HT & WT option	Scripted	Liver Density	1080	Female Baseline CV (%)	20.4	SCorneum Fat (%) : Female	12.9	Jej-Ileum Ratio:Il/Duo Dia C1	0.725	Volume Pulmonary Capilliary Blood (L): CV (%)	20	Bone : KpALB	0.1	AGP CV (%) : Female	13			Bulk flow from spinal CSF to cranial CSF (% CSF spinal absorption rate) CV (%)	0	Additional Organ : membrane potential : (mV)	-41	IgG CLcat,free CV (%)	10	% of total lymph flow (Lung)	3	Target1 Lambda (1/h)	0	Tumour : Lymph Flow (mL/min/mL of tumour)	0	Stroma thickness (mm)	1.2
Male Body Weight CV (%)	15	MPPGL : Baseline	1.407	Female Age Cut-Off 1	48	SCorneum Fat CV (%) : Female	30	Dep of LG on BSA :C1	5.231	Volume Epithelial Lining Fluid (L): Mean	0.025	Bone : KpLPP	0.05	HSA : Male	Scripted			CSF Volume		Additional Organ : subcell membrane potential (mV)	10	Ontogeny Profile	No Profile Used	% of total lymph flow (Muscle)	16	Target2 Name	IgE	Tumour Tissue Type	Generic	Stroma thickness CV (%)	44	Enzyme	CYP2C9
Male Height CV (%)	5.7	MPPGL : C1	0.01579	Female Age Cut-Off Baseline 2	66.2	VEpidermis Thickness (µm) : Male	50.7	Dep of LG on BSA :Exp	0.414	Volume Epithelial Lining Fluid(L): CV (%)	20	Brain : IW (%)	67.8	HSA CV (%) : Male	10			CSF (% Brain volume) : Male	Scripted	Additional Organ : subcell pH	5	FcRn Concentration (µM)	40	% of total lymph flow (Pancreas)	0.3	Target2 Rmax (µM)	0	Tumour : EW (%)	32.47	Cervix thickness (mm)	30.2	Adult Max	0.98
Female Body Weight CV (%)	10	MPPGL : C2	-0.0003824	Female Age Cut-off 1 CV 1 (%)	26.5	VEpidermis Thickness CV (%) : Male	24	Dep of LG on BSA :CV LG Len	20	Surface Area Airway (m2): Mean	1.5	Brain : AP (mg/g)	0.4	HSA : Female	Scripted			CSF (% Brain volume) : Female	Scripted	Additional Organ : IW pH	7	FcRn Coefficient	0.95	% of total lymph flow (Skin)	7.3	Target2 Rmax CV (%)	30	Tumour : IW (%)	53.76	Cervix thickness CV (%)	21	Fbirth	0.17
Female Height CV (%)	5.2	MPPGL : C3	2.37e-06	Female Age Cut-off 1 CV 2 (%)	22.8	VEpidermis Thickness (µm) : Female	53.8	S9PPI : input type	Predicted	Surface Area Airway (m2): CV (%)	50	Brain : KpALB	0.048	HSA CV (%) : Female	10			Spinal (% CSF) : Male	30	Additional Organ Local pH : EW	7.4	Additional Clearance (L/h)	0.0017	% of total lymph flow (Spleen)	1	Target2 Kdeg (1/h)	0	Tumour : NL (%)	0.96	Luminal fluid volume (mL)	0.5	Age50 (X50)	0.0157
Male Distribution	Uniform	MPPGL : CV (%)	26.9	Female Age Cut-Off 2	78	VEpidermis Thickness CV (%) : Female	19	S9PPI : Mean	5320	Surface Area Alveoli (m2): Mean	140	Brain : KpLPP	0.041	Other Mean : Male	0			Spinal (% CSF) : Female	30	Additional Organ Local pH : IW	7	Additional Clearance CV (%)	10	% of total lymph flow (Additional Organ)	0	Target2 Kdeg CV (%)	30	Tumour : NP (%)	0.98	Luminal fluid volume CV (%)	30	n(Agen)	0.53
Female Distribution	Uniform	CPPGL : Baseline	28.8945	Female Age Cut-Off Baseline 3	79.5	VEpidermis Fat (%) : Male	3	MPPI : Mean	2978	Surface Area Alveoli (m2): CV (%)	30	Gut : IW (%)	45.1	Other CV (%)(%) : Male	0			Intracranial blood volume (% Brain Volume) : Male	5	Additional Organ : subcell fraction (%)	0	Lymphatic Clearance (L/h)	0	Lymph flow rate (L/h/kg)	0.00385518	Target2 Kshed (1/hr)	0	Tumour : AP (mg/g)	2.4	Luminal fluid pH	4.8	Age-cap	5
Abundance : CYP1A2 PM Freq	0	CPPGL : Correlation Coefficient	1.31032	Female Age Cut-Off 2 CV 1 (%)	38.3	VEpidermis Fat CV (%) : Male	30	MPPI : CV (%)	30	Lobe Distribution Percentage (%) Ventillation Rate RL	25.9	Gut : AP (mg/g)	2.84	Other Mean : Female	0			Intracranial blood volume (% Brain Volume) : Female	5	Additional Organ : Male (% of Qc)	0.65	Lymphatic Clearance CV (%)	10	Lymph volume (L/kg)	0.00386	Target2 Kshed CV (%)	30	Tumour : KpALB	0.138	Luminal fluid pH CV (%)	18	Additional Function	No
Abundance : CYP1A2 UM Freq	0	CPPGL : CV (%)	21.467	Female Age Cut-Off 2 CV 2 (%)	31.6	VEpidermis Fat (%) : Female	3	CPPI : Mean	2342	Lobe Distribution Percentage (%) Ventillation Rate RM	12.4	Gut : KpALB	0.158	Other CV (%)(%) : Female	0			Abundance : ABCB1 (P-gp/MDR1) Mean	1	Additional Organ : Female (% of Qc)	0.65	Vendothelial (fraction of tissuevolume)	0.005	Lymph volume CV (%)	30	Target2 Lambda (1/h)	0	Tumour : Other Protein (µM)	0	Regional blood flow scalar to vagina	1
Abundance : CYP1A2 IM Freq	0	HPGL : Mean	125	Prediction Method	Method 1	VEpidermis Fat CV (%) : Female	30	CPPI : CV (%)	31	Lobe Distribution Percentage (%) Ventillation Rate RT	14.8	Gut : KpLPP	0.141	User-defined Binding Type	User-defined			Abundance : ABCB1 (P-gp/MDR1) CV (%)	0	Additional Organ % of Body Weight	1	σv (Sigmav)	0.76	Total Plasma Protein (g/100ml)	6.85	Target3 Name	CD11a	Tumour : CV (%)	30	Regional blood flow scalar to vagina CV (%)	0	Enzyme	Intestinal CYP2C9
Abundance : CYP2A6 PM Freq	0	HPGL : CV (%)	20	Ref Value for Males 20~30	130			MPPC : Mean	622	Lobe Distribution Percentage (%) Ventillation Rate LL	32.1	Heart : IW (%)	44.5	Ontogeny Profile	No Profile Used			Abundance : ABCC4 (MRP4) Mean	1	Additional Organ % of Body Weight CV (%)	30	σl (Sigmal)	0.2	Total Plasma Protein CV (%)	1.5	Target3 Rmax (µM)	0	Tumour : EW pH	7.13	Regional blood flow scalar to cervix	1	Adult Max	1.059
Abundance : CYP2A6 UM Freq	0	P450/10e6 Cells : Baseline	3.034	Ref Value for Females 20~30	120	MechDermA - Upper Arm		MPPC : CV (%)	30	Lobe Distribution Percentage (%) Ventillation Rate LT	14.8	Heart : AP (mg/g)	3.07	Use Plasma ES Option	Yes			Abundance : ABCC4 (MRP4) CV (%)	0	Additional Organ Density (g/L)	923	Kup (1/h)	0.0298			Target3 Rmax CV (%)	30	Tumour : IW pH	7.26	Regional blood flow scalar to cervix CV (%)	0	Fbirth	0.42
Abundance : CYP2A6 IM Freq	0	P450/10e6 Cells : HPGL Coefficient	-0.506	Age Limit	140	SCorneum Thickness (µm) : Male	11.9	TMePPI : Mean	2737	Lobe Distribution Percentage (%) Ventillation Rate LA	100	Heart : KpALB	0.157	Abundance : Plasma ES EM Mean	1			Abundance : ABCG2 (BCRP) Mean	1	Additional Organ Capillary Bed (%)	5	Krc (1/h)	0.548			Target3 Kdeg (1/h)	0	Tumour : Vascular volume fraction	12			Age50 (X50)	2.357
Abundance : CYP2B6 PM Freq	0.11	Advanced Bile Model	No	Kidney Size	Script	SCorneum Thickness CV (%) : Male	29	TMePPI : CV (%)	0	Lobe Distribution Percentage (%) Ventillation Rate UA	100	Heart : KpLPP	0.16	Abundance : Plasma ES EM CV (%)	30			Abundance : ABCG2 (BCRP) CV (%)	0	For neutral (phospho)lipid Partitioning	Using Olive oil-water Partitioning	Krc,complex (1/h)	1.125			Target3 Kdeg CV (%)	30	Tumour : Endosomal volume fraction	5			n(Agen)	1
Abundance : CYP2B6 UM Freq	0	% Hepatic Bile Entering Gallbladder Mean	70.3	Kidney Volume Male CV (%)	0	SCorneum Thickness (µm) : Female	13.9	TMePPC : Mean	112	Lobe Distribution Percentage (%) Blood Flow Rate RL	31.1	Kidney : IW (%)	50	Abundance : Plasma ES PM Mean	0			Abundance : Apical Influx (BBB) Mean	1	Additional Organ : Endothelial Volume (%)	0.35625	FR	0.715			Target3 Kshed (1/hr)	0	Tumour : Interstitial volume fraction	25.63			Age-cap	18
Abundance : CYP2B6 IM Freq	0	% Hepatic Bile Entering Gallbladder CV (%)	32.1	Kidney Volume Female CV (%)	0	SCorneum Thickness CV (%) : Female	28	TMePPC : CV (%)	0	Lobe Distribution Percentage (%) Blood Flow Rate RM	11.8	Kidney : AP (mg/g)	2.48	Abundance : Plasma ES PM CV (%)	0			Abundance : Apical Influx (BBB) CV (%)	0	Additional Organ : Kup (1/h)	0.02979	Adipose σv	0.815			Target3 Kshed CV (%)	30	Tumour Growth Inhibition Model Type	Simeoni Cell Distribution			Additional Function	No
Abundance : CYP2C8 PM Freq	0	IMMC Cycle Time Mean (h)	1.55	Kidney Density	1050	SCorneum Fat (%) : Male	12.9	Use NEWE model for MBI and/or induction of gut CYPs	No	Lobe Distribution Percentage (%) Blood Flow Rate RT	8.6	Kidney : KpALB	0.13	Abundance : Plasma ES UM Mean	0			Abundance : Apical Influx (BCSFB) Mean	1	Additional Organ : Krc1 (1/h)	3.605	Bone σv	1			Target3 Lambda (1/h)	0	Tumour : Exponential Growth Rate (1/day)	1
Abundance : CYP2C8 UM Freq	0	IMMC Cycle Time CV (%)	55	Kidney function option	Values	SCorneum Fat CV (%) : Male	47	CYP2C9 EM Mean	12.5	Lobe Distribution Percentage (%) Blood Flow Rate LL	34.9	Kidney : KpLPP	0.137	Abundance : Plasma ES UM CV (%)	0			Abundance : Apical Influx (BCSFB) CV (%)	0	Additional Organ : Krc2 (1/h)	7.21	Brain σv	0.998			Target4 Name	Target 4	Tumour : CV (%)	0			Enzyme	UGT1A9
Abundance : CYP2C8 IM Freq	0	Fasted Gallbladder Emptied at % IMMC Cycle	30	GFR Function a0	-17.74	SCorneum Fat (%) : Female	12.9	CYP2C9 EM CV (%)	72	Lobe Distribution Percentage (%) Blood Flow Rate LT	8.6	Liver : IW (%)	58.6	Abundance : Plasma ES IM Mean	0			Abundance : Apical Efflux (BCSFB) Mean	1	Additional Organ : FR	0.715	Gut σv	0.8			Target4 Rmax (µM)	0	Tumour : Linear Growth Rate (g/day)	1			Adult Max	1.041
Abundance : CYP2C9 PM Freq	0.06	Fasted Gallbladder Release Constant Mean (1/h)	0.18	GFR Function a1	99.054	SCorneum Fat CV (%) : Female	47	CYP2C9 PM Mean	5	Lobe Distribution Percentage (%) Blood Flow Rate LA	5	Liver : AP (mg/g)	5.09	Abundance : Plasma ES IM CV (%)	0			Abundance : Apical Efflux (BCSFB) CV (%)	0			Heart σv	0.489			Target4 Rmax CV (%)	30	Tumour : CV (%)	0			Fbirth	0.086
Abundance : CYP2C9 UM Freq	0	Fasted Gallbladder Release Constant CV (%)	30	GFR Function a2	-6.1604	VEpidermis Thickness (µm) : Male	37.1	CYP2C9 PM Mean CV (%)	72	Lobe Distribution Percentage (%) Blood Flow Rate UA	2.5	Liver : KpALB	0.086									Kidney σv	0.726			Target4 Kdeg (1/h)	0	Tumour : Shape Factor	20			Age50 (X50)	1.16
Abundance : CYP2C9 IM Freq	0	Fed Gallbladder Release Constant Mean (1/h)	0.48	GFR Function CV	15	VEpidermis Thickness CV (%) : Male	51	CYP2C9 UM Mean	0	Lobe Distribution Percentage (%) Alveoli Volume RL	26.3	Liver : KpLPP	0.161									Liver σv	0.22			Target4 Kdeg CV (%)	30	Tumour : Transit Rate Cell Damage (1/day)	1			n(Agen)	1.2
Abundance : CYP2C18 PM Freq	0	Fed Gallbladder Release Constant CV (%)	19	PTCPGK Mean	60	VEpidermis Thickness (µm) : Female	45.7	CYP2C9 UM Mean CV (%)	0	Lobe Distribution Percentage (%) Alveoli Volume RM	10.5	Lung : IW (%)	46.3									Lung σv	0.397			Target4 Kshed (1/hr)	0	Tumour : CV (%)	0			Age-cap	15
Abundance : CYP2C18 UM Freq	0	Fasted Gallbladder Residual Volume Mean (%)	79.4	PTCPGK CV (%)	30	VEpidermis Thickness CV (%) : Female	62	CYP2C9 IM Mean	0	Lobe Distribution Percentage (%) Alveoli Volume RT	15.8	Lung : AP (mg/g)	0.5									Muscle σv	0.875			Target4 Kshed CV (%)	30	Tumour : Number Transit Compartments	3			Additional Function	No
Abundance : CYP2C18 IM Freq	0	Fasted Gallbladder Residual Volume CV (%)	13.1	MPPGK Mean	12.8	VEpidermis Fat (%) : Male	3	CYP2C9 IM Mean CV (%)	0	Lobe Distribution Percentage (%) Alveoli Volume LL	26.3	Lung : KpALB	0.212									Skin σv	0.822			Target4 Lambda (1/h)	0	ABCB1 (P-gp/MDR1) ET Mean	1
Abundance : CYP2C19 PM Freq	0.092	Fed Gallbladder Residual Volume Mean (%)	59.9	MPPGK CV (%)	55	VEpidermis Fat CV (%) : Male	30	CYP2C9 Mean Turnover Rate	0.03	Lobe Distribution Percentage (%) Alveoli Volume LT	21.1	Lung : KpLPP	0.168									Spleen σv	0.2			Target5 Name	Target 5	ABCB1 (P-gp/MDR1) CV (%)	0			Transporter	Intestinal ABCB1 (P-gp/MDR1)
Abundance : CYP2C19 UM Freq	0.318	Fed Gallbladder Residual Volume CV (%)	39.6	CPPGK Mean	0	VEpidermis Fat (%) : Female	3	CYP2C9 Mean Turnover Rate CV (%)	20	Lobe Distribution Percentage (%) Alveoli Volume LA	50	Muscle : IW (%)	66.9									Additional Organ σv	0.95			Target5 Rmax (µM)	0	ABCB1 (P-gp/MDR1) PT Mean	1			Adult Max	1
Abundance : CYP2C19 IM Freq	0	Enzyme interCorr Switch	Off	CPPGK CV (%)	30	VEpidermis Fat CV (%) : Female	30	Colon CYP2C9 EM Mean	0	Lobe Distribution Percentage (%) Alveoli Volume UA	50	Muscle : AP (mg/g)	2.49									Pancreas σv	0.5			Target5 Rmax CV (%)	30	ABCB1 (P-gp/MDR1) CV (%)	0			Fbirth	1
Abundance : CYP2D6 PM Freq	0.082	Enzyme Corr Switch	On	S9 Method	Predicted			Colon CYP2C9 EM CV (%)	0	Lobe Distribution Percentage (%) Absorption Area RL	26.3	Muscle : KpALB	0.034									Subcutaneous site σv	0.822			Target5 Kdeg (1/h)	0	ABCB1 (P-gp/MDR1) IT Mean	1			Age50 (X50)	10
Abundance : CYP2D6 UM Freq	0.053	Enz Corr C0	62.775	S9PPGK Mean	12.8	MechDermA - Lower Leg		Colon CYP2C9 PM Mean	N/A	Lobe Distribution Percentage (%) Absorption Area RM	10.5	Muscle : KpLPP	0.059									Adipose σl	0.2			Target5 Kdeg CV (%)	30	ABCB1 (P-gp/MDR1) CV (%)	0			n(Agen)	1
Abundance : CYP2D6 IM Freq	0	Enz Corr C1	0.3934	UGT1A1 EM Mean	1	SCorneum Thickness (µm) : Male	16.8	Colon CYP2C9 PM Mean CV (%)	N/A	Lobe Distribution Percentage (%) Absorption Area RT	15.8	Skin : IW (%)	9.47									Bone σl	0.2			Target5 Kshed (1/hr)	0	ABCB1 (P-gp/MDR1) UT Mean	1			Age-cap	0
Abundance : CYP2E1 PM Freq	0	Enz 2 Corr CV	24	UGT1A1 EM Mean CV (%)	50	SCorneum Thickness CV (%) : Male	52	Colon CYP2C9 UM Mean	N/A	Lobe Distribution Percentage (%) Absorption Area LL	26.3	Skin : AP (mg/g)	1.32									Brain σl	0.2			Target5 Kshed CV (%)	30	ABCB1 (P-gp/MDR1) CV (%)	0			Additional Function	No
Abundance : CYP2E1 UM Freq	0	Abundance : CYP1A2 EM Mean	52	UGT1A1 PM Mean	0.42	SCorneum Thickness (µm) : Female	13.9	Colon CYP2C9 UM Mean CV (%)	N/A	Lobe Distribution Percentage (%) Absorption Area LT	21.1	Skin : KpALB	0.277									Gut σl	0.2			Target5 Lambda (1/h)	0	ABCG2 (BCRP) ET Mean	1
Abundance : CYP2E1 IM Freq	0	Abundance : CYP1A2 EM CV (%)	67	UGT1A1 PM Mean CV (%)	50	SCorneum Thickness CV (%) : Female	43	Colon CYP2C9 IM Mean	N/A	Lobe Distribution Percentage (%) Absorption Area LA	50	Skin : KpLPP	0.096									Heart σl	0.2			Target6 Name	Target 6	ABCG2 (BCRP) CV (%)	0			Transporter	Intestinal ABCC2 (MRP2)
Abundance : CYP2J2 PM Freq	0	Abundance : CYP1A2 PM Mean	0	UGT1A1 UM Mean	1.46	SCorneum Fat (%) : Male	4.7	Colon CYP2C9 IM Mean CV (%)	N/A	Lobe Distribution Percentage (%) Absorption Area UA	50	Spleen : IW (%)	57.9									Kidney σl	0.2			Target6 Rmax (µM)	0	ABCG2 (BCRP) PT Mean	1			Adult Max	1
Abundance : CYP2J2 UM Freq	0	Abundance : CYP1A2 PM CV (%)	0	UGT1A1 UM Mean CV (%)	50	SCorneum Fat CV (%) : Male	62	Colon CYP2C9 Mean Turnover Rate	N/A	Lobe Distribution Percentage (%) Pulmonary Capilliary Blood Volume RL	16.66	Spleen : AP (mg/g)	2.81									Liver σl	0.2			Target6 Rmax CV (%)	30	ABCG2 (BCRP) CV (%)	0			Fbirth	1
Abundance : CYP2J2 IM Freq	0	Abundance : CYP1A2 UM Mean	0	UGT1A1 IM Mean	0.72	SCorneum Fat (%) : Female	4.7	Colon CYP2C9 Mean Turnover Rate CV (%)	N/A	Lobe Distribution Percentage (%) Pulmonary Capilliary Blood Volume RM	16.67	Spleen : KpALB	0.097									Lung σl	0.2			Target6 Kdeg (1/h)	0	ABCG2 (BCRP) IT Mean	1			Age50 (X50)	10
Abundance : CYP3A4 PM Freq	0	Abundance : CYP1A2 UM CV (%)	0	UGT1A1 IM Mean CV (%)	50	SCorneum Fat CV (%) : Female	62	CYP2C19 EM Mean	2	Lobe Distribution Percentage (%) Pulmonary Capilliary Blood Volume RT	16.67	Spleen : KpLPP	0.207									Muscle σl	0.2			Target6 Kdeg CV (%)	30	ABCG2 (BCRP) CV (%)	0			n(Agen)	1
Abundance : CYP3A4 UM Freq	0	Abundance : CYP1A2 IM Mean	0	UGT1A1 Absolute Abundance	6.1	VEpidermis Thickness (µm) : Male	63.4	CYP2C19 EM CV (%)	77	Lobe Distribution Percentage (%) Pulmonary Capilliary Blood Volume LL	16.67	Plasma : IW (%)	0									Skin σl	0.2			Target6 Kshed (1/hr)	0	ABCG2 (BCRP) UT Mean	1			Age-cap	0
Abundance : CYP3A4 IM Freq	0	Abundance : CYP1A2 IM CV (%)	0	UGT1A1 Mean Turnover Rate	0.0578	VEpidermis Thickness CV (%) : Male	32	CYP2C19 PM Mean	0	Lobe Distribution Percentage (%) Pulmonary Capilliary Blood Volume LT	16.67	Plasma : AP (mg/g)	0.04									Spleen σl	0.2			Target6 Kshed CV (%)	30	ABCG2 (BCRP) CV (%)	0			Additional Function	No
Abundance : CYP3A5 PM Freq	0.83	Turnover rate : CYP1A2 Mean	0.0183	UGT1A1 Mean Turnover Rate CV (%)	30	VEpidermis Thickness (µm) : Female	74.9	CYP2C19 PM Mean CV (%)	0	Lobe Distribution Percentage (%) Pulmonary Capilliary Blood Volume LA	8.33	RBC : IW (%)	66.6									Additional Organ σl	0.2			Target6 Lambda (1/h)	0	Efflux (Tumour) ET Mean	1
Abundance : CYP3A5 UM Freq	0	Turnover rate : CYP1A2 CV (%)	56	UGT1A3 EM Mean	1	VEpidermis Thickness CV (%) : Female	19	CYP2C19 UM Mean	4	Lobe Distribution Percentage (%) Pulmonary Capilliary Blood Volume UA	8.33	RBC : AP (mg/g)	0.44									Pancreas σl	0.2			Target7 Name	Target 7	Efflux (Tumour) CV (%)	0			Transporter	Intestinal ABCG2 (BCRP)
Abundance : CYP3A5 IM Freq	0	Abundance : CYP2A6 EM Mean	20	UGT1A3 EM Mean CV (%)	50	VEpidermis Fat (%) : Male	3	CYP2C19 UM Mean CV (%)	77	Lobe Distribution Percentage (%) Pulmonary Mass Volume RL	16.66	Pancreas : IW (%)	66.4									Subcutaneous site σl	0.2			Target7 Rmax (µM)	0	Efflux (Tumour) PT Mean	1			Adult Max	1
Abundance : CYP3A7 PM Freq	0.88	Abundance : CYP2A6 EM CV (%)	173	UGT1A3 PM Mean	0	VEpidermis Fat CV (%) : Male	30	CYP2C19 IM Mean	0	Lobe Distribution Percentage (%) Pulmonary Mass Volume RM	16.67	Pancreas : AP (mg/g)	1.67									Adipose FR	0			Target7 Rmax CV (%)	30	Efflux (Tumour) CV (%)	0			Fbirth	1
Abundance : CYP3A7 UM Freq	0	Abundance : CYP2A6 PM Mean	0	UGT1A3 PM Mean CV (%)	0	VEpidermis Fat (%) : Female	3	CYP2C19 IM Mean CV (%)	0	Lobe Distribution Percentage (%) Pulmonary Mass Volume RT	16.67	Pancreas : KpALB	0.06									Bone FR	1			Target7 Kdeg (1/h)	0	Efflux (Tumour) IT Mean	1			Age50 (X50)	10
Abundance : CYP3A7 IM Freq	0	Abundance : CYP2A6 PM CV (%)	0	UGT1A3 UM Mean	0	VEpidermis Fat CV (%) : Female	30	CYP2C19 Mean Turnover Rate	0.03	Lobe Distribution Percentage (%) Pulmonary Mass Volume LL	16.67	Pancreas : KpLPP	0.06									Brain FR	1			Target7 Kdeg CV (%)	30	Efflux (Tumour) CV (%)	0			n(Agen)	1
Abundance : CYP2C9 Allele 1 Genotype 1 Freq	0.672	Abundance : CYP2A6 UM Mean	0	UGT1A3 UM Mean CV (%)	0			CYP2C19 Mean Turnover Rate CV (%)	20	Lobe Distribution Percentage (%) Pulmonary Mass Volume LT	16.67	Placenta : IW (%)	0									Gut FR	1			Target7 Kshed (1/hr)	0	Efflux (Tumour) UT Mean	1			Age-cap	0
Abundance : CYP2C9 Allele 1 Genotype 2 Freq	0.186	Abundance : CYP2A6 UM CV (%)	0	UGT1A3 IM Mean	0	MechDermA - Thigh		Colon CYP2C19 EM Mean	0	Lobe Distribution Percentage (%) Pulmonary Mass Volume LA	8.33	Placenta : AP (mg/g)	0									Heart FR	1			Target7 Kshed CV (%)	30	Efflux (Tumour) CV (%)	0			Additional Function	No
Abundance : CYP2C9 Allele 1 Genotype 3 Freq	0.111	Abundance : CYP2A6 IM Mean	0	UGT1A3 IM Mean CV (%)	0	SCorneum Thickness (µm) : Male	11	Colon CYP2C19 EM CV (%)	0	Lobe Distribution Percentage (%) Pulmonary Mass Volume UA	8.33	Placenta : KpALB	0									Kidney FR	1			Target7 Lambda (1/h)	0	Uptake (Tumour) ET Mean	1
Abundance : CYP2C9 Allele 1 Genotype 4 Freq	0.011	Abundance : CYP2A6 IM CV (%)	0	UGT1A3 Absolute Abundance	0	SCorneum Thickness CV (%) : Male	32	Colon CYP2C19 PM Mean	N/A	Lobe Distribution Percentage (%) Epithelial Lining Fluid Volume RL	16.66	Placenta : KpLPP	0									Liver FR	1			Target8 Name	Target 8	Uptake (Tumour) CV (%)	0			Transporter	Intestinal Apical Influx (Intestine)
Abundance : CYP2C9 Allele 1 Genotype 5 Freq	0.017	Turnover rate : CYP2A6 Mean	0.0267	UGT1A3 Mean Turnover Rate	1e-06	SCorneum Thickness (µm) : Female	11	Colon CYP2C19 PM Mean CV (%)	N/A	Lobe Distribution Percentage (%) Epithelial Lining Fluid Volume RM	16.67	Adipose Volume Scalar	1									Lung FR	1			Target8 Rmax (µM)	0	Uptake (Tumour) PT Mean	1			Adult Max	1
Abundance : CYP2C9 Allele 1 Genotype 6 Freq	0.003	Turnover rate : CYP2A6 CV (%)	56	UGT1A3 Mean Turnover Rate CV (%)	30	SCorneum Thickness CV (%) : Female	20	Colon CYP2C19 UM Mean	N/A	Lobe Distribution Percentage (%) Epithelial Lining Fluid Volume RT	16.67	Bone Volume Scalar	1									Muscle FR	0			Target8 Rmax CV (%)	30	Uptake (Tumour) CV (%)	0			Fbirth	1
Abundance : UGT1A1 PM Freq	0.11	Abundance : CYP2B6 EM Mean	17	UGT1A4 EM Mean	1	SCorneum Fat (%) : Male	23.7	Colon CYP2C19 UM Mean CV (%)	N/A	Lobe Distribution Percentage (%) Epithelial Lining Fluid Volume LL	16.67	Brain Volume Scalar	1									Skin FR	0			Target8 Kdeg (1/h)	0	Uptake (Tumour) IT Mean	1			Age50 (X50)	10
Abundance : UGT1A1 UM Freq	0.01	Abundance : CYP2B6 EM CV (%)	122	UGT1A4 EM Mean CV (%)	50	SCorneum Fat CV (%) : Male	24	Colon CYP2C19 IM Mean	N/A	Lobe Distribution Percentage (%) Epithelial Lining Fluid Volume LT	16.67	Gut Volume Scalar	1									Spleen FR	1			Target8 Kdeg CV (%)	30	Uptake (Tumour) CV (%)	0			n(Agen)	1
Abundance : UGT1A1 IM Freq	0.44	Abundance : CYP2B6 PM Mean	6	UGT1A4 PM Mean	0	SCorneum Fat (%) : Female	23.7	Colon CYP2C19 IM Mean CV (%)	N/A	Lobe Distribution Percentage (%) Epithelial Lining Fluid Volume LA	8.33	Heart Volume Scalar	1									Additional Organ FR	1			Target8 Kshed (1/hr)	0	Uptake (Tumour) UT Mean	1			Age-cap	0
Abundance : UGT1A3 PM Freq	0	Abundance : CYP2B6 PM CV (%)	200	UGT1A4 PM Mean CV (%)	0	SCorneum Fat CV (%) : Female	24	Colon CYP2C19 Mean Turnover Rate	N/A	Lobe Distribution Percentage (%) Epithelial Lining Fluid Volume UA	8.33	Kidney Volume Scalar	1									Pancreas FR	1			Target8 Kshed CV (%)	30	Uptake (Tumour) CV (%)	0			Additional Function	No
Abundance : UGT1A3 UM Freq	0	Abundance : CYP2B6 UM Mean	0	UGT1A4 UM Mean	0	VEpidermis Thickness (µm) : Male	53.3	Colon CYP2C19 Mean Turnover Rate CV (%)	N/A	Use local pH by segment	No	Liver Volume Scalar	1									Subcutaneous site FR	0			Target8 Lambda (1/h)	0	Tumour : Target Abundance (µM)	0
Abundance : UGT1A3 IM Freq	0	Abundance : CYP2B6 UM CV (%)	0	UGT1A4 UM Mean CV (%)	0	VEpidermis Thickness CV (%) : Male	40	CYP2D6 EM Mean	1.1	Basal Influx 1 (Lung) Mean	1	Lung Volume Scalar	1									Adipose FcRn	0.93069			Target9 Name	Target 9	Tumour : CV (%)	0			Transporter	Hepatic ABCB1 (P-gp/MDR1)
Abundance : UGT1A4 PM Freq	0	Abundance : CYP2B6 IM Mean	0	UGT1A4 IM Mean	0	VEpidermis Thickness (µm) : Female	43.3	CYP2D6 EM CV (%)	47	Basal Influx 1 (Lung) CV (%)	0	Muscle Volume Scalar	1									Bone FcRn	2.24581			Target9 Rmax (µM)	0	Tumour : Target MW (Da)	150000			Adult Max	1
Abundance : UGT1A4 UM Freq	0	Abundance : CYP2B6 IM CV (%)	0	UGT1A4 IM Mean CV (%)	0	VEpidermis Thickness CV (%) : Female	40	CYP2D6 PM Mean	0	Basal Influx 2 (Lung) Mean	1	Skin Volume Scalar	1									Brain FcRn	0.246748			Target9 Rmax CV (%)	30	Tumour : Tissue Radius (µm)	75			Fbirth	1
Abundance : UGT1A4 IM Freq	0	Turnover rate : CYP2B6 Mean	0.0217	UGT1A4 Absolute Abundance	8.7	VEpidermis Fat (%) : Male	3	CYP2D6 PM Mean CV (%)	0	Basal Influx 2 (Lung) CV (%)	0	Spleen Volume Scalar	1									Gut FcRn	1.69464			Target9 Kdeg (1/h)	0	Tumour : CV (%)	30			Age50 (X50)	10
Abundance : UGT1A5 PM Freq	0	Turnover rate : CYP2B6 CV (%)	56	UGT1A4 Mean Turnover Rate	1e-06	VEpidermis Fat CV (%) : Male	30	CYP2D6 UM Mean	2.1	Basal Efflux 1 (Lung) Mean	1	Plasma Volume Scalar	1									Heart FcRn	0.864965			Target9 Kdeg CV (%)	30	Tumour : Capillary Radius (µm)	8			n(Agen)	1
Abundance : UGT1A5 UM Freq	0	Abundance : CYP2C8 EM Mean	24	UGT1A4 Mean Turnover Rate CV (%)	30	VEpidermis Fat (%) : Female	3	CYP2D6 UM Mean CV (%)	47	Basal Efflux 1 (Lung) CV (%)	0	Placenta Volume Scalar	0									Kidney FcRn	0.766998			Target9 Kshed (1/hr)	0	Tumour : CV (%)	10			Age-cap	0
Abundance : UGT1A5 IM Freq	0	Abundance : CYP2C8 EM CV (%)	81	UGT1A5 EM Mean	1	VEpidermis Fat CV (%) : Female	30	CYP2D6 IM Mean	0	Basal Efflux 2 (Lung) Mean	1	Membrane potential : Adipose (mV)	-41									Liver FcRn	2.40702			Target9 Kshed CV (%)	30	Tumour : Correction Factor	0.63			Additional Function	No
Abundance : UGT1A6 PM Freq	0	Abundance : CYP2C8 PM Mean	0	UGT1A5 EM Mean CV (%)	50			CYP2D6 IM Mean CV (%)	0	Basal Efflux 2 (Lung) CV (%)	0	Membrane potential : Bone (mV)	-41									Lung FcRn	3.04753			Target9 Lambda (1/h)	0	Tumour : CV (%)	0
Abundance : UGT1A6 UM Freq	0	Abundance : CYP2C8 PM CV (%)	0	UGT1A5 PM Mean	0	MechDermA - Face		CYP2D6 Mean Turnover Rate	0.03	Apical Influx 1 (Lung) Mean	1	Membrane potential : Brain (mV)	-41									Muscle FcRn	0.485806			Target10 Name	Target 10	Tumour : Capillary Small Pore Radius (nm)	4.5			Transporter	Hepatic ABCC2 (MRP2)
Abundance : UGT1A6 IM Freq	0	Abundance : CYP2C8 UM Mean	0	UGT1A5 PM Mean CV (%)	0	SCorneum Thickness (µm) : Male	14.3	CYP2D6 Mean Turnover Rate CV (%)	20	Apical Influx 1 (Lung) CV (%)	0	Membrane potential : Gut (mV)	-41									Skin FcRn	2.96258			Target10 Rmax (µM)	0	Tumour : Capillary Large Pore Radius (nm)	500			Adult Max	1
Abundance : UGT1A7 PM Freq	0	Abundance : CYP2C8 UM CV (%)	0	UGT1A5 UM Mean	0	SCorneum Thickness CV (%) : Male	23	Colon CYP2D6 EM Mean	0	Apical Influx 2 (Lung) Mean	1	Membrane potential : Heart (mV)	-41									Spleen FcRn	2.24581			Target10 Rmax CV (%)	30	Tumour : Capillary Small Pore Membrane Thickness (1/cm)	17.6			Fbirth	1
Abundance : UGT1A7 UM Freq	0	Abundance : CYP2C8 IM Mean	0	UGT1A5 UM Mean CV (%)	0	SCorneum Thickness (µm) : Female	15.6	Colon CYP2D6 EM CV (%)	0	Apical Influx 2 (Lung) CV (%)	0	Membrane potential : Kidney (mV)	-70									Additional Organ FcRn	1			Target10 Kdeg (1/h)	0	Tumour : Capillary Large Pore Membrane Thickness (1/cm)	0.65			Age50 (X50)	10
Abundance : UGT1A7 IM Freq	0	Abundance : CYP2C8 IM CV (%)	0	UGT1A5 IM Mean	0	SCorneum Thickness CV (%) : Female	21	Colon CYP2D6 PM Mean	N/A	Apical Efflux 1 (Lung) Mean	1	Membrane potential : Liver (mV)	-41									Pancreas FcRn	1.69464			Target10 Kdeg CV (%)	30	Tumour : Capillary Small Pore Hydrolic Conductance	0.01			n(Agen)	1
Abundance : UGT1A8 PM Freq	0	Turnover rate : CYP2C8 Mean	0.0301	UGT1A5 IM Mean CV (%)	0	SCorneum Fat (%) : Male	7.2	Colon CYP2D6 PM Mean CV (%)	N/A	Apical Efflux 1 (Lung) CV (%)	0	Membrane potential : Lung (mV)	-41									Subcutaneous site FcRn	2.96258			Target10 Kshed (1/hr)	0	Tumour : Interstitial Small Pore Radius (nm)	13.8			Age-cap	0
Abundance : UGT1A8 UM Freq	0	Turnover rate : CYP2C8 CV (%)	56	UGT1A5 Absolute Abundance	0	SCorneum Fat CV (%) : Male	12	Colon CYP2D6 UM Mean	N/A	Apical Efflux 2 (Lung) Mean	1	Membrane potential : Muscle (mV)	-41									Adipose PS	0			Target10 Kshed CV (%)	30	Tumour : Interstitial Large Pore Radius (nm)	1000			Additional Function	No
Abundance : UGT1A8 IM Freq	0	Abundance : CYP2C9 EM Mean	73	UGT1A5 Mean Turnover Rate	1e-06	SCorneum Fat (%) : Female	7.2	Colon CYP2D6 UM Mean CV (%)	N/A	Apical Efflux 2 (Lung) CV (%)	0	Membrane potential : Skin (mV)	-41									Bone PS	0.1			Target10 Lambda (1/h)	0	Tumour : Interstitial Small Pore Fraction	0.9
Abundance : UGT1A9 PM Freq	0.04	Abundance : CYP2C9 EM CV (%)	54	UGT1A5 Mean Turnover Rate CV (%)	30	SCorneum Fat CV (%) : Female	12	Colon CYP2D6 IM Mean	N/A			Membrane potential : Spleen (mV)	-41									Brain PS	0			Target11 Name	Target 11	Tumour : FcRn Abundance Scalar	1			Transporter	Hepatic ABCG2 (BCRP)
Abundance : UGT1A9 UM Freq	0	Abundance : CYP2C9 PM Mean	29	UGT1A6 EM Mean	1	VEpidermis Thickness (µm) : Male	38.9	Colon CYP2D6 IM Mean CV (%)	N/A	Initial bacteria number	20	Membrane potential : RBC (mV)	-10									Gut PS	0			Target11 Rmax (µM)	0					Adult Max	1
Abundance : UGT1A9 IM Freq	0	Abundance : CYP2C9 PM CV (%)	73	UGT1A6 EM Mean CV (%)	50	VEpidermis Thickness CV (%) : Male	50	Colon CYP2D6 Mean Turnover Rate	N/A			Membrane potential : Pancreas (mV)	-41									Heart PS	0			Target11 Rmax CV (%)	30					Fbirth	1
Abundance : UGT1A10 PM Freq	0	Abundance : CYP2C9 UM Mean	0	UGT1A6 PM Mean	0	VEpidermis Thickness (µm) : Female	37.4	Colon CYP2D6 Mean Turnover Rate CV (%)	N/A	Granuloma growth period (days)	200	Membrane potential : Placenta (mV)	0									Kidney PS	0			Target11 Kdeg (1/h)	0					Age50 (X50)	10
Abundance : UGT1A10 UM Freq	0	Abundance : CYP2C9 UM CV (%)	0	UGT1A6 PM Mean CV (%)	0	VEpidermis Thickness CV (%) : Female	21	CYP2J2 EM Mean	7.4			Ve (Fraction Tissue volume) : Lung	0.0050985									Liver PS	0			Target11 Kdeg CV (%)	30					n(Agen)	1
Abundance : UGT1A10 IM Freq	0	Abundance : CYP2C9 IM Mean	0	UGT1A6 UM Mean	0	VEpidermis Fat (%) : Male	3	CYP2J2 EM CV (%)	69	Granuloma location Frequency: RLM	1	Ve (Fraction Tissue volume) : Heart	0.001155									Lung PS	0			Target11 Kshed (1/hr)	0					Age-cap	0
Abundance : UGT2B4 PM Freq	0	Abundance : CYP2C9 IM CV (%)	0	UGT1A6 UM Mean CV (%)	0	VEpidermis Fat CV (%) : Male	30	CYP2J2 PM Mean	0	Granuloma location Frequency: RMM	0	Ve (Fraction Tissue volume) : Brain	0.0025									Muscle PS	0			Target11 Kshed CV (%)	30					Additional Function	No
Abundance : UGT2B4 UM Freq	0	Turnover rate : CYP2C9 Mean	0.0067	UGT1A6 IM Mean	0	VEpidermis Fat (%) : Female	3	CYP2J2 PM Mean CV (%)	0	Granuloma location Frequency: RMM	0	Ve (Fraction Tissue volume) : Muscle	0.001375									Skin PS	0			Target11 Lambda (1/h)	0
Abundance : UGT2B4 IM Freq	0	Turnover rate : CYP2C9 CV (%)	56	UGT1A6 IM Mean CV (%)	0	VEpidermis Fat CV (%) : Female	30	CYP2J2 UM Mean	0	Granuloma location Frequency: LLM	0	Ve (Fraction Tissue volume) : Skin	0.00275									Spleen PS	0			Target12 Name	Target 12					Transporter	Hepatic SLCO1B1 (OATP1B1)
Abundance : UGT2B7 PM Freq	0	Abundance : CYP2C18 EM Mean	1	UGT1A6 Absolute Abundance	3.6			CYP2J2 UM Mean CV (%)	0	Granuloma location Frequency: LTM	0	Ve (Fraction Tissue volume) : Adipose	0.001925									Additional Organ PS	0			Target12 Rmax (µM)	0					Adult Max	1
Abundance : UGT2B7 UM Freq	0	Abundance : CYP2C18 EM CV (%)	106	UGT1A6 Mean Turnover Rate	1e-06	MPMLA - Forehead		CYP2J2 IM Mean	0			Ve (Fraction Tissue volume) : Bone	0.001375									Pancreas PS	0			Target12 Rmax CV (%)	30					Fbirth	1
Abundance : UGT2B7 IM Freq	0	Abundance : CYP2C18 PM Mean	0	UGT1A6 Mean Turnover Rate CV (%)	30	Skin surface pH : Male	4.5	CYP2J2 IM Mean CV (%)	0	Macrophage diameter (μm): Mean	21.2	Ve (Fraction Tissue volume) : Kidney	0.001925									Additional Organ PS	0.01			Target12 Kdeg (1/h)	0					Age50 (X50)	10
Abundance : UGT2B10 PM Freq	0	Abundance : CYP2C18 PM CV (%)	0	UGT1A7 EM Mean	1	Skin surface pH CV (%) : Male	7.4	CYP2J2 Mean Turnover Rate	0.03	Macrophage fraction (%): Mean	50	Ve (Fraction Tissue volume) : ByPass	0									Subcutaneous site PS	0			Target12 Kdeg CV (%)	30					n(Agen)	1
Abundance : UGT2B10 UM Freq	0	Abundance : CYP2C18 UM Mean	0	UGT1A7 EM Mean CV (%)	50	Skin temperature °C : Male	32	CYP2J2 Mean Turnover Rate CV (%)	20	ISF fraction (%): Mean	10	Ve (Fraction Tissue volume) : Gut	0.001375									Adipose fCLcat	0.05			Target12 Kshed (1/hr)	0					Age-cap	0
Abundance : UGT2B10 IM Freq	0	Abundance : CYP2C18 UM CV (%)	0	UGT1A7 PM Mean	0	Skin temperature CV (%) : Male	0	Colon CYP2J2 EM Mean	0	ISF fraction: CV (%)	30	Ve (Fraction Tissue volume) : Spleen	0.001375									Bone fCLcat	0.05			Target12 Kshed CV (%)	30					Additional Function	No
Abundance : UGT2B11 PM Freq	0	Abundance : CYP2C18 IM Mean	0	UGT1A7 PM Mean CV (%)	0	Shape of corneocyte : Male	Cuboid (brick)	Colon CYP2J2 EM CV (%)	0	Outer-caseum fraction (%): Mean	20	Ve (Fraction Tissue volume) : Pancreas	0.001375									Brain fCLcat	0.0009			Target12 Lambda (1/h)	0
Abundance : UGT2B11 UM Freq	0	Abundance : CYP2C18 IM CV (%)	0	UGT1A7 UM Mean	0	Shape of corneocyte : Female	Cuboid (brick)	Colon CYP2J2 PM Mean	N/A	Outer-caseum fraction: CV (%)	30	Ve (Fraction Tissue volume) : Liver	0.001375									Gut fCLcat	0.025			Target13 Name	Target 13					Transporter	Hepatic SLCO1B3 (OATP1B3)
Abundance : UGT2B11 IM Freq	0	Turnover rate : CYP2C18 Mean	0.0267	UGT1A7 UM Mean CV (%)	0	Number of SC layers : Male	12	Colon CYP2J2 PM Mean CV (%)	N/A	Inner-caseum fraction (%): Mean	20	Subcell Membrane potential : Adipose (mV)	10									Heart fCLcat	0.0054			Target13 Rmax (µM)	0					Adult Max	1
Abundance : UGT2B15 PM Freq	0.28	Turnover rate : CYP2C18 CV (%)	56	UGT1A7 IM Mean	0	Number of SC layers CV (%) : Male	8	Colon CYP2J2 UM Mean	N/A	Inner-caseum fraction: CV (%)	30	Subcell Membrane potential : Bone (mV)	10									Kidney fCLcat	0.041			Target13 Rmax CV (%)	30					Fbirth	1
Abundance : UGT2B15 UM Freq	0	Abundance : CYP2C19 EM Mean	4.4	UGT1A7 IM Mean CV (%)	0	Water density gm/cm3 : Male	1	Colon CYP2J2 UM Mean CV (%)	N/A			Subcell Membrane potential : Brain (mV)	10									Liver fCLcat	0.41			Target13 Kdeg (1/h)	0					Age50 (X50)	10
Abundance : UGT2B15 IM Freq	0.51	Abundance : CYP2C19 EM CV (%)	71	UGT1A7 Absolute Abundance	13	Water density CV (%) : Male	0	Colon CYP2J2 IM Mean	N/A	Local pH: macrophage	5	Subcell Membrane potential : Gut (mV)	10									Lung fCLcat	0.0057			Target13 Kdeg CV (%)	30					n(Agen)	1
Abundance : UGT2B17 PM Freq	0.09	Abundance : CYP2C19 PM Mean	0	UGT1A7 Mean Turnover Rate	1e-06	SC lipids density gm/cm3 : Male	0.9	Colon CYP2J2 IM Mean CV (%)	N/A	Local pH: ISF	6.7	Subcell Membrane potential : Heart (mV)	10									Muscle fCLcat	0.1			Target13 Kshed (1/hr)	0					Age-cap	0
Abundance : UGT2B17 UM Freq	0	Abundance : CYP2C19 PM CV (%)	0	UGT1A7 Mean Turnover Rate CV (%)	30	SC lipids density CV (%) : Male	0	Colon CYP2J2 Mean Turnover Rate	N/A	Local pH: caseum	7.4	Subcell Membrane potential : Kidney (mV)	10									Skin fCLcat	0.27			Target13 Kshed CV (%)	30					Additional Function	No
Abundance : UGT2B17 IM Freq	0.36	Abundance : CYP2C19 UM Mean	8.7	UGT1A8 EM Mean	1	SC proteins density gm/cm3 : Male	1.37	Colon CYP2J2 Mean Turnover Rate CV (%)	N/A			Subcell Membrane potential : Liver (mV)	10									Spleen fCLcat	0.018			Target13 Lambda (1/h)	0
Abundance : UGT2B28 PM Freq	0	Abundance : CYP2C19 UM CV (%)	71	UGT1A8 EM Mean CV (%)	50	SC proteins density CV (%) : Male	0	CYP3A4 EM Mean	65.4	Uptake (macrophage): Mean	1	Subcell Membrane potential : Lung (mV)	10									Additional Organ fCLcat	0.01			Target14 Name	Target 14					Transporter	Hepatic SLCO2B1 (OATP2B1)
Abundance : UGT2B28 UM Freq	0	Abundance : CYP2C19 IM Mean	0	UGT1A8 PM Mean	0	Intercellular lipid thickness of SC µm : Male	0.091	CYP3A4 EM CV (%)	52	Uptake (macrophage): CV (%)	1	Subcell Membrane potential : Muscle (mV)	10									Pancreas fCLcat	0.005			Target14 Rmax (µM)	0					Adult Max	1
Abundance : UGT2B28 IM Freq	0	Abundance : CYP2C19 IM CV (%)	0	UGT1A8 PM Mean CV (%)	0	Intercellular lipid thickness of SC CV (%) : Male	0	CYP3A4 PM Mean	0	Efflux (macrophage): Mean	1	Subcell Membrane potential : Skin (mV)	10									Subcutaneous site fCLcat	0.000239			Target14 Rmax CV (%)	30					Fbirth	1
Abundance : User UGT1 PM Freq	0	Turnover rate : CYP2C19 Mean	0.0267	UGT1A8 UM Mean	0	Tortuosity : Male	User Defined	CYP3A4 PM Mean CV (%)	0	Efflux (macrophage): CV (%)	0	Subcell Membrane potential : Spleen (mV)	10									Kup Full PBPK (1/h)	0.0298			Target14 Kdeg (1/h)	0					Age50 (X50)	10
Abundance : User UGT1 UM Freq	0	Turnover rate : CYP2C19 CV (%)	56	UGT1A8 UM Mean CV (%)	0	Tortuosity of lipid diffusion pathway of SC : Male	12.7	CYP3A4 UM Mean	0	BN pre-treatment number: Mean	80	Subcell Membrane potential : RBC (mV)	10									Krc Full PBPK (1/h)	3.605			Target14 Kdeg CV (%)	30					n(Agen)	1
Abundance : User UGT1 IM Freq	0	Abundance : CYP2D6 EM Mean	9.4	UGT1A8 IM Mean	0	Tortuosity of lipid diffusion pathway of SC CV (%) : Male	18	CYP3A4 UM Mean CV (%)	0	BN pre-treatment number: CV (%)	30	Subcell Membrane potential : Pancreas (mV)	10									Krc,complex Full PBPK (1/h)	7.21			Target14 Kshed (1/hr)	0					Age-cap	0
Abundance : User Cyt1 PM Freq	0	Abundance : CYP2D6 EM CV (%)	65	UGT1A8 IM Mean CV (%)	0	Hair follicle diameter µm : Male	65.4	CYP3A4 IM Mean	0			Subcell Membrane potential : Placenta (mV)	0									Additional Clearance Full PBPK (L/h)	0.0020407			Target14 Kshed CV (%)	30					Additional Function	No
Abundance : User Cyt1 UM Freq	0	Abundance : CYP2D6 PM Mean	0	UGT1A8 Absolute Abundance	4.9	Hair follicle diameter CV (%) : Male	83	CYP3A4 IM Mean CV (%)	0			Local pH (IW) : Adipose	7									Additional Clearance Full PBPK CV (%)	10			Target14 Lambda (1/h)	0
Abundance : User Cyt1 IM Freq	0	Abundance : CYP2D6 PM CV (%)	0	UGT1A8 Mean Turnover Rate	1e-06	Hair follicle density N/cm2 : Male	292	CYP3A4 Mean Turnover Rate	0.03			Local pH (IW) : Bone	7													Target15 Name	Target 15					Transporter	Sinusoidal Uptake (Liver)
Abundance : User Cyt2 PM Freq	0	Abundance : CYP2D6 UM Mean	18.8	UGT1A8 Mean Turnover Rate CV (%)	30	Hair follicle density CV (%) : Male	16	CYP3A4 Mean Turnover Rate CV (%)	20			Local pH (IW) : Brain	7.12													Target15 Rmax (µM)	0					Adult Max	1
Abundance : User Cyt2 UM Freq	0	Abundance : CYP2D6 UM CV (%)	65	UGT1A9 EM Mean	1	Hair follicle depth µm : Male	204.8	Colon CYP3A4 EM Mean	1.99			Local pH (IW) : Gut	7													Target15 Rmax CV (%)	30					Fbirth	1
Abundance : User Cyt2 IM Freq	0	Abundance : CYP2D6 IM Mean	0	UGT1A9 EM Mean CV (%)	50	Hair follicle depth CV (%) : Male	0	Colon CYP3A4 EM CV (%)	30			Local pH (IW) : Heart	7													Target15 Kdeg (1/h)	0					Age50 (X50)	10
Abundance : User Cyt3 PM Freq	0	Abundance : CYP2D6 IM CV (%)	0	UGT1A9 PM Mean	0.07	Hair shaft diameter µm : Male	15.9	Colon CYP3A4 PM Mean	N/A			Local pH (IW) : Kidney	7.2													Target15 Kdeg CV (%)	30					n(Agen)	1
Abundance : User Cyt3 UM Freq	0	Turnover rate : CYP2D6 Mean	0.0099	UGT1A9 PM Mean CV (%)	50	Hair shaft diameter CV (%) : Male	57	Colon CYP3A4 PM Mean CV (%)	N/A			Local pH (IW) : Liver	7													Target15 Kshed (1/hr)	0					Age-cap	0
Abundance : User Cyt3 IM Freq	0	Turnover rate : CYP2D6 CV (%)	56	UGT1A9 UM Mean	0	Sebum viscosity centipose : Male	40	Colon CYP3A4 UM Mean	N/A			Local pH (IW) : Lung	6.7													Target15 Kshed CV (%)	30					Additional Function	No
Abundance : User Cyt4 PM Freq	0	Abundance : CYP2E1 EM Mean	61	UGT1A9 UM Mean CV (%)	0	Sebum viscosity CV (%) : Male	0	Colon CYP3A4 UM Mean CV (%)	N/A			Local pH (IW) : Muscle	7													Target15 Lambda (1/h)	0
Abundance : User Cyt4 UM Freq	0	Abundance : CYP2E1 EM CV (%)	61	UGT1A9 IM Mean	0.19	Corneocyte pH [top] : Male	6.8	Colon CYP3A4 IM Mean	N/A			Local pH (IW) : Skin	7													Target16 Name	Target 16					Transporter	Sinusoidal Efflux (Liver)
Abundance : User Cyt4 IM Freq	0	Abundance : CYP2E1 PM Mean	0	UGT1A9 IM Mean CV (%)	50	Corneocyte pH [top] CV (%) : Male	6.8	Colon CYP3A4 IM Mean CV (%)	N/A			Local pH (IW) : Spleen	7													Target16 Rmax (µM)	0					Adult Max	1
Abundance : CES1 PM Freq	0.001	Abundance : CYP2E1 PM CV (%)	0	UGT1A9 Absolute Abundance	79	Corneocyte thickness [top] µm : Male	0.71	Colon CYP3A4 Mean Turnover Rate	N/A			Local pH (IW) : RBC	7.22													Target16 Rmax CV (%)	30					Fbirth	1
Abundance : CES1 UM Freq	0	Abundance : CYP2E1 UM Mean	0	UGT1A9 Mean Turnover Rate	1e-06	Corneocyte thickness [top] CV (%) : Male	36	Colon CYP3A4 Mean Turnover Rate CV (%)	N/A			Local pH (IW) : Pancreas	7													Target16 Kdeg (1/h)	0					Age50 (X50)	10
Abundance : CES1 IM Freq	0	Abundance : CYP2E1 UM CV (%)	0	UGT1A9 Mean Turnover Rate CV (%)	30	Corneocyte width [top] µm : Male	27.7	CYP3A5 EM Mean	23.3			Local pH (IW) : Placenta	0													Target16 Kdeg CV (%)	30					n(Agen)	1
Abundance : CES2 PM Freq	0	Abundance : CYP2E1 IM Mean	0	UGT1A10 EM Mean	1	Corneocyte width [top] CV (%) : Male	9.2	CYP3A5 EM CV (%)	32			Subcell pH : Adipose	5													Target16 Kshed (1/hr)	0					Age-cap	0
Abundance : CES2 UM Freq	0	Abundance : CYP2E1 IM CV (%)	0	UGT1A10 EM Mean CV (%)	50	Corneocyte length [top] µm : Male	34.2	CYP3A5 PM Mean	0			Subcell pH : Bone	5													Target16 Kshed CV (%)	30					Additional Function	No
Abundance : CES2 IM Freq	0	Turnover rate : CYP2E1 Mean	0.0176	UGT1A10 PM Mean	0	Corneocyte length [top] CV (%) : Male	4.1	CYP3A5 PM Mean CV (%)	0			Subcell pH : Brain	5													Target16 Lambda (1/h)	0
Abundance : User ES PM Freq	0	Turnover rate : CYP2E1 CV (%)	63	UGT1A10 PM Mean CV (%)	0	Hydration level (% water volume) [top] : Male	35.5	CYP3A5 UM Mean	0			Subcell pH : Gut	5													Target17 Name	Target 17					Transporter	Canalicular Efflux (Liver)
Abundance : User ES UM Freq	0	Abundance : CYP2J2 EM Mean	1.2	UGT1A10 UM Mean	0	Hydration level (% water volume) [top] CV (%) : Male	17	CYP3A5 UM Mean CV (%)	0			Subcell pH : Heart	5													Target17 Rmax (µM)	0					Adult Max	1
Abundance : User ES IM Freq	0	Abundance : CYP2J2 EM CV (%)	175	UGT1A10 UM Mean CV (%)	0	SC lipid viscosity [top] centipose : Male	75	CYP3A5 IM Mean	0			Subcell pH : Kidney	5													Target17 Rmax CV (%)	30					Fbirth	1
Abundance : PM Freq	0	Abundance : CYP2J2 PM Mean	0	UGT1A10 IM Mean	0	SC lipid viscosity [top] CV (%) : Male	0	CYP3A5 IM Mean CV (%)	0			Subcell pH : Liver	5													Target17 Kdeg (1/h)	0					Age50 (X50)	10
Abundance : UM Freq	0	Abundance : CYP2J2 PM CV (%)	0	UGT1A10 IM Mean CV (%)	0	Corneocyte pH [upper mid] : Male	6.8	CYP3A5 Mean Turnover Rate	0.03			Subcell pH : Lung	5													Target17 Kdeg CV (%)	30					n(Agen)	1
Abundance : IM Freq	0	Abundance : CYP2J2 UM Mean	0	UGT1A10 Absolute Abundance	17	Corneocyte pH [upper mid] CV (%) : Male	6.8	CYP3A5 Mean Turnover Rate CV (%)	20			Subcell pH : Muscle	5													Target17 Kshed (1/hr)	0					Age-cap	0
Abundance : PM Freq	0	Abundance : CYP2J2 UM CV (%)	0	UGT1A10 Mean Turnover Rate	1e-06	Corneocyte thickness [upper mid] µm : Male	0.81	Colon CYP3A5 EM Mean	0.74			Subcell pH : Skin	5													Target17 Kshed CV (%)	30					Additional Function	No
Abundance : UM Freq	0	Abundance : CYP2J2 IM Mean	0	UGT1A10 Mean Turnover Rate CV (%)	30	Corneocyte thickness [upper mid] CV (%) : Male	36	Colon CYP3A5 EM CV (%)	30			Subcell pH : Spleen	5													Target17 Lambda (1/h)	0
Abundance : IM Freq	0	Abundance : CYP2J2 IM CV (%)	0	UGT2B4 EM Mean	1	Corneocyte width [upper mid] µm : Male	27.7	Colon CYP3A5 PM Mean	N/A			Subcell pH : RBC	5													Target18 Name	Target 18					Transporter	Brain ABCB1 (P-gp/MDR1)
Abundance : Plasma ES PM Freq	0	Turnover rate : CYP2J2 Mean	0.0194	UGT2B4 EM Mean CV (%)	50	Corneocyte width [upper mid] CV (%) : Male	9.2	Colon CYP3A5 PM Mean CV (%)	N/A			Subcell pH : Pancreas	5													Target18 Rmax (µM)	0					Adult Max	1
Abundance : Plasma ES UM Freq	0	Turnover rate : CYP2J2 CV (%)	56	UGT2B4 PM Mean	0	Corneocyte length [upper mid] µm : Male	34.2	Colon CYP3A5 UM Mean	N/A			Subcell pH : Placenta	0													Target18 Rmax CV (%)	30					Fbirth	1
Abundance : Plasma ES IM Freq	0	Abundance : CYP3A4 EM Mean	137	UGT2B4 PM Mean CV (%)	0	Corneocyte length [upper mid] CV (%) : Male	4.1	Colon CYP3A5 UM Mean CV (%)	N/A			Local pH : Plasma	7.4													Target18 Kdeg (1/h)	0					Age50 (X50)	10
Abundance : FMO1 PM Freq	0	Abundance : CYP3A4 EM CV (%)	41	UGT2B4 UM Mean	0	Hydration level (% water volume) [upper mid] : Male	46.1	Colon CYP3A5 IM Mean	N/A			Local pH : EW	7.4													Target18 Kdeg CV (%)	30					n(Agen)	1
Abundance : FMO1 UM Freq	0	Abundance : CYP3A4 PM Mean	0	UGT2B4 UM Mean CV (%)	0	Hydration level (% water volume) [upper mid] CV (%) : Male	11	Colon CYP3A5 IM Mean CV (%)	N/A			Local pH : Generic IW	7													Target18 Kshed (1/hr)	0					Age-cap	0
Abundance : FMO1 IM Freq	0	Abundance : CYP3A4 PM CV (%)	0	UGT2B4 IM Mean	0	SC lipid viscosity [upper mid] centipose : Male	75	Colon CYP3A5 Mean Turnover Rate	N/A			Local pH : Gut ISF	7.23													Target18 Kshed CV (%)	30					Additional Function	No
Abundance : FMO3 PM Freq	0	Abundance : CYP3A4 UM Mean	0	UGT2B4 IM Mean CV (%)	0	SC lipid viscosity [upper mid] CV (%) : Male	0	Colon CYP3A5 Mean Turnover Rate CV (%)	N/A			Local pH : CSF	7.31													Target18 Lambda (1/h)	0
Abundance : FMO3 UM Freq	0	Abundance : CYP3A4 UM CV (%)	0	UGT2B4 Absolute Abundance	0.3	Corneocyte pH [lower mid] : Male	6.8	UGT1A1 EM Mean	1			Local pH : Pulmonary Fluid	6.6													Target19 Name	Target 19					Transporter	Brain ABCG2 (BCRP)
Abundance : FMO3 IM Freq	0	Abundance : CYP3A4 IM Mean	0	UGT2B4 Mean Turnover Rate	1e-06	Corneocyte pH [lower mid] CV (%) : Male	6.8	UGT1A1 EM Mean CV (%)	60			Subcell fraction : Adipose(%)	0													Target19 Rmax (µM)	0					Adult Max	1
Abundance : FMO5 PM Freq	0	Abundance : CYP3A4 IM CV (%)	0	UGT2B4 Mean Turnover Rate CV (%)	30	Corneocyte thickness [lower mid] µm : Male	0.91	UGT1A1 PM Mean	0.42			Subcell fraction : Bone(%)	0													Target19 Rmax CV (%)	30					Fbirth	1
Abundance : FMO5 UM Freq	0	Turnover rate : CYP3A4 Mean	0.0193	UGT2B7 EM Mean	1	Corneocyte thickness [lower mid] CV (%) : Male	36	UGT1A1 PM Mean CV (%)	60			Subcell fraction : Brain(%)	0													Target19 Kdeg (1/h)	0					Age50 (X50)	10
Abundance : FMO5 IM Freq	0	Turnover rate : CYP3A4 CV (%)	68	UGT2B7 EM Mean CV (%)	50	Corneocyte width [lower mid] µm : Male	27.7	UGT1A1 UM Mean	1.46			Subcell fraction : Gut(%)	0													Target19 Kdeg CV (%)	30					n(Agen)	1
Abundance : FMOUser PM Freq	0	Abundance : CYP3A5 EM Mean	103	UGT2B7 PM Mean	0	Corneocyte width [lower mid] CV (%) : Male	9.2	UGT1A1 UM Mean CV (%)	60			Subcell fraction : Heart(%)	0													Target19 Kshed (1/hr)	0					Age-cap	0
Abundance : FMOUser UM Freq	0	Abundance : CYP3A5 EM CV (%)	65	UGT2B7 PM Mean CV (%)	0	Corneocyte length [lower mid] µm : Male	34.2	UGT1A1 IM Mean	0.72			Subcell fraction : Kidney(%)	1													Target19 Kshed CV (%)	30					Additional Function	No
Abundance : FMOUser IM Freq	0	Abundance : CYP3A5 PM Mean	0	UGT2B7 UM Mean	0	Corneocyte length [lower mid] CV (%) : Male	4.1	UGT1A1 IM Mean CV (%)	60			Subcell fraction : Liver(%)	1													Target19 Lambda (1/h)	0
Abundance : ABCB1 (P-gp/MDR1) PT Freq	0	Abundance : CYP3A5 PM CV (%)	0	UGT2B7 UM Mean CV (%)	0	Hydration level (% water volume) [lower mid] : Male	56.75	UGT1A1 Absolute Abundance	8.5			Subcell fraction : Lung(%)	1													Target20 Name	Target 20					Transporter	Brain ABCC4 (MRP4)
Abundance : ABCB1 (P-gp/MDR1) IT Freq	0	Abundance : CYP3A5 UM Mean	0	UGT2B7 IM Mean	0	Hydration level (% water volume) [lower mid] CV (%) : Male	7	UGT1A3 EM Mean	1			Subcell fraction : Muscle(%)	0													Target20 Rmax (µM)	0					Adult Max	1
Abundance : ABCB1 (P-gp/MDR1) UT Freq	0	Abundance : CYP3A5 UM CV (%)	0	UGT2B7 IM Mean CV (%)	0	SC lipid viscosity [lower mid] centipose : Male	75	UGT1A3 EM Mean CV (%)	60			Subcell fraction : Skin(%)	0													Target20 Rmax CV (%)	30					Fbirth	1
Abundance : ABCB11 (BSEP) PT Freq	0	Abundance : CYP3A5 IM Mean	0	UGT2B7 Absolute Abundance	48	SC lipid viscosity [lower mid] CV (%) : Male	0	UGT1A3 PM Mean	0			Subcell fraction : Spleen(%)	0													Target20 Kdeg (1/h)	0					Age50 (X50)	10
Abundance : ABCB11 (BSEP) IT Freq	0	Abundance : CYP3A5 IM CV (%)	0	UGT2B7 Mean Turnover Rate	1e-06	Corneocyte pH [bottom] : Male	6.8	UGT1A3 PM Mean CV (%)	0			Subcell fraction : Pancreas(%)	0													Target20 Kdeg CV (%)	30					n(Agen)	1
Abundance : ABCB11 (BSEP) UT Freq	0	Turnover rate : CYP3A5 Mean	0.0193	UGT2B7 Mean Turnover Rate CV (%)	30	Corneocyte pH [bottom] CV (%) : Male	6.8	UGT1A3 UM Mean	0			Subcell fraction : Placenta(%)	0													Target20 Kshed (1/hr)	0					Age-cap	0
Abundance : ABCC1 (MRP1) PT Freq	0	Turnover rate : CYP3A5 CV (%)	68	UGT2B10 EM Mean	1	Corneocyte thickness [bottom] µm : Male	1.03	UGT1A3 UM Mean CV (%)	0			Liver model	PerMCL													Target20 Kshed CV (%)	30					Additional Function	No
Abundance : ABCC1 (MRP1) IT Freq	0	Abundance : CYP3A7 EM Mean	35.4	UGT2B10 EM Mean CV (%)	50	Corneocyte thickness [bottom] CV (%) : Male	36	UGT1A3 IM Mean	0			Liver : 1 VS (%)	5													Target20 Lambda (1/h)	0
Abundance : ABCC1 (MRP1) UT Freq	0	Abundance : CYP3A7 EM CV (%)	61	UGT2B10 PM Mean	0	Corneocyte width [bottom] µm : Male	27.7	UGT1A3 IM Mean CV (%)	0			Liver : 1 EW (%)	16.5																			Transporter	Apical Influx (BBB)
Abundance : ABCC2 (MRP2) PT Freq	0	Abundance : CYP3A7 PM Mean	0	UGT2B10 PM Mean CV (%)	0	Corneocyte width [bottom] CV (%) : Male	9.2	UGT1A3 Absolute Abundance	0.4			Liver : 1 NL (%)	3.48																			Adult Max	1
Abundance : ABCC2 (MRP2) IT Freq	0	Abundance : CYP3A7 PM CV (%)	0	UGT2B10 UM Mean	0	Corneocyte length [bottom] µm : Male	34.2	UGT1A4 EM Mean	1			Liver : 1 NP (%)	2.52																			Fbirth	1
Abundance : ABCC2 (MRP2) UT Freq	0	Abundance : CYP3A7 UM Mean	0	UGT2B10 UM Mean CV (%)	0	Corneocyte length [bottom] CV (%) : Male	4.1	UGT1A4 EM Mean CV (%)	60			Liver : 1 IW (%)	58.6																			Age50 (X50)	10
Abundance : ABCC3 (MRP3) PT Freq	0	Abundance : CYP3A7 UM CV (%)	0	UGT2B10 IM Mean	0	Hydration level (% water volume) [bottom] : Male	67.4	UGT1A4 PM Mean	0			Liver : 1 AP (mg/g)	5.09																			n(Agen)	1
Abundance : ABCC3 (MRP3) IT Freq	0	Abundance : CYP3A7 IM Mean	0	UGT2B10 IM Mean CV (%)	0	Hydration level (% water volume) [bottom] CV (%) : Male	4	UGT1A4 PM Mean CV (%)	0			Liver : 1 KpALB	0.086																			Age-cap	0
Abundance : ABCC3 (MRP3) UT Freq	0	Abundance : CYP3A7 IM CV (%)	0	UGT2B10 Absolute Abundance	0	SC lipid viscosity [bottom] centipose : Male	75	UGT1A4 UM Mean	0			Liver : 1 KpLPP	0.161																			Additional Function	No
Abundance : ABCC4 (MRP4) PT Freq	0	Turnover rate : CYP3A7 Mean	0.019	UGT2B10 Mean Turnover Rate	1e-06	SC lipid viscosity [bottom] CV (%) : Male	0	UGT1A4 UM Mean CV (%)	0			Liver : 1 Local pH (IW)	7
Abundance : ABCC4 (MRP4) IT Freq	0	Turnover rate : CYP3A7 CV (%)	68	UGT2B10 Mean Turnover Rate CV (%)	30	Viable Epidermis thickness µm : Male	50.05	UGT1A4 IM Mean	0			Liver : 1 Local pH (EW)	7.4																			Transporter	Apical Efflux (BCSFB)
Abundance : ABCC4 (MRP4) UT Freq	0	3A4 M / F difference	Same	UGT2B11 EM Mean	1	Viable Epidermis thickness CV (%) : Male	7	UGT1A4 IM Mean CV (%)	0			Liver : 2 VS (%)	5																			Adult Max	1
Abundance : ABCC6 (MRP6) PT Freq	0	Abundance : 3A4 Mean : Male	137	UGT2B11 EM Mean CV (%)	50	Dermis thickness µm : Male	1250	UGT1A4 Absolute Abundance	1.9			Liver : 2 EW (%)	16.5																			Fbirth	1
Abundance : ABCC6 (MRP6) IT Freq	0	Abundance : 3A4 CV (%) : Male	41	UGT2B11 PM Mean	0	Dermis thickness CV (%) : Male	45	UGT1A5 EM Mean	1			Liver : 2 NL (%)	3.48																			Age50 (X50)	10
Abundance : ABCC6 (MRP6) UT Freq	0	Abundance : 3A4 Mean : Female	137	UGT2B11 PM Mean CV (%)	0	Subcutis thickness mm : Male	1.91	UGT1A5 EM Mean CV (%)	60			Liver : 2 NP (%)	2.52																			n(Agen)	1
Abundance : ABCG2 (BCRP) PT Freq	0.02	Abundance : 3A4 CV (%) : Female	41	UGT2B11 UM Mean	0	Subcutis thickness CV (%) : Male	55.7	UGT1A5 PM Mean	0			Liver : 2 IW (%)	58.6																			Age-cap	0
Abundance : ABCG2 (BCRP) IT Freq	0.17	Abundance : CYP2C9 Allele 1 Genotype 1 Mean	83.4	UGT2B11 UM Mean CV (%)	0	Muscle thickness mm : Male	1.46	UGT1A5 PM Mean CV (%)	0			Liver : 2 AP (mg/g)	5.09																			Additional Function	No
Abundance : ABCG2 (BCRP) UT Freq	0	Abundance : CYP2C9 Allele 1 Genotype 1 CV (%)	60.5	UGT2B11 IM Mean	0	Muscle thickness CV (%) : Male	2.74	UGT1A5 UM Mean	0			Liver : 2 KpALB	0.086
Abundance : SLC2A2 (GLUT2) PT Freq	0	Turnover rate : CYP2C9 Allele 1 Genotype 1 Mean	0.0067	UGT2B11 IM Mean CV (%)	0	Dermis regional blood flow scalar : Male	2.13	UGT1A5 UM Mean CV (%)	0			Liver : 2 KpLPP	0.161																			Transporter	Apical Influx (BCSFB)
Abundance : SLC2A2 (GLUT2) IT Freq	0	Turnover rate : CYP2C9 Allele 1 Genotype 1 CV (%)	56	UGT2B11 Absolute Abundance	0	Dermis regional blood flow scalar CV (%) : Male	0	UGT1A5 IM Mean	0			Liver : 2 Local pH (IW)	7																			Adult Max	1
Abundance : SLC2A2 (GLUT2) UT Freq	0	Abundance : CYP2C9 Allele 1 Genotype 2 Mean	75.8	UGT2B11 Mean Turnover Rate	1e-06	Subcutis regional blood flow scalar : Male	1	UGT1A5 IM Mean CV (%)	0			Liver : 2 Local pH (EW)	7.4																			Fbirth	1
Abundance : SLC10A1 (NTCP) PT Freq	0	Abundance : CYP2C9 Allele 1 Genotype 2 CV (%)	63.8	UGT2B11 Mean Turnover Rate CV (%)	30	Subcutis regional blood flow scalar CV (%) : Male	0	UGT1A5 Absolute Abundance	0.3			Liver : 3 VS (%)	5																			Age50 (X50)	10
Abundance : SLC10A1 (NTCP) IT Freq	0	Turnover rate : CYP2C9 Allele 1 Genotype 2 Mean	0.0067	UGT2B15 EM Mean	1	Muscle regional blood flow scalar : Male	1	UGT1A6 EM Mean	1			Liver : 3 EW (%)	16.5																			n(Agen)	1
Abundance : SLC10A1 (NTCP) UT Freq	0	Turnover rate : CYP2C9 Allele 1 Genotype 2 CV (%)	56	UGT2B15 EM Mean CV (%)	50	Muscle regional blood flow scalar CV (%) : Male	0	UGT1A6 EM Mean CV (%)	60			Liver : 3 NL (%)	3.48																			Age-cap	0
Abundance : SLC10A2 (ASBT/IBAT) PT Freq	0	Abundance : CYP2C9 Allele 1 Genotype 3 Mean	75.8	UGT2B15 PM Mean	0.07			UGT1A6 PM Mean	0			Liver : 3 NP (%)	2.52																			Additional Function	No
Abundance : SLC10A2 (ASBT/IBAT) IT Freq	0	Abundance : CYP2C9 Allele 1 Genotype 3 CV (%)	63.8	UGT2B15 PM Mean CV (%)	50	MPMLA - Forearm Inner (volar)		UGT1A6 PM Mean CV (%)	0			Liver : 3 IW (%)	58.6
Abundance : SLC10A2 (ASBT/IBAT) UT Freq	0	Turnover rate : CYP2C9 Allele 1 Genotype 3 Mean	0.0067	UGT2B15 UM Mean	0	Skin surface pH : Male	4.5	UGT1A6 UM Mean	0			Liver : 3 AP (mg/g)	5.09																			Transporter	Kidney ABCB1 (P-gp/MDR1)
Abundance : SLC15A1 (PEPT1) PT Freq	0	Turnover rate : CYP2C9 Allele 1 Genotype 3 CV (%)	56	UGT2B15 UM Mean CV (%)	0	Skin surface pH CV (%) : Male	8.2	UGT1A6 UM Mean CV (%)	0			Liver : 3 KpALB	0.086																			Fmax	1
Abundance : SLC15A1 (PEPT1) IT Freq	0	Abundance : CYP2C9 Allele 1 Genotype 4 Mean	75.8	UGT2B15 IM Mean	0.47	Skin temperature °C : Male	32	UGT1A6 IM Mean	0			Liver : 3 KpLPP	0.161																			Fbirth	1e-06
Abundance : SLC15A1 (PEPT1) UT Freq	0	Abundance : CYP2C9 Allele 1 Genotype 4 CV (%)	63.8	UGT2B15 IM Mean CV (%)	50	Skin temperature CV (%) : Male	0	UGT1A6 IM Mean CV (%)	0			Liver : 3 Local pH (IW)	7																			Age50 (X50)	0.077
Abundance : SLC16A1 (MCT1) PT Freq	0	Turnover rate : CYP2C9 Allele 1 Genotype 4 Mean	0.0067	UGT2B15 Absolute Abundance	0.2	Shape of corneocyte : Male	Cuboid (brick)	UGT1A6 Absolute Abundance	1.3			Liver : 3 Local pH (EW)	7.4																			n(Agen)	0.73
Abundance : SLC16A1 (MCT1) IT Freq	0	Turnover rate : CYP2C9 Allele 1 Genotype 4 CV (%)	56	UGT2B15 Mean Turnover Rate	1e-06	Shape of corneocyte : Female	Cuboid (brick)	UGT1A7 EM Mean	1			Liver : 4 VS (%)	5																			Age-cap	25
Abundance : SLC16A1 (MCT1) UT Freq	0	Abundance : CYP2C9 Allele 1 Genotype 5 Mean	75.8	UGT2B15 Mean Turnover Rate CV (%)	30	Number of SC layers : Male	22	UGT1A7 EM Mean CV (%)	60			Liver : 4 EW (%)	16.5																			Additional Function	No
Abundance : SLCO1B1 (OATP1B1) PT Freq	0.03	Abundance : CYP2C9 Allele 1 Genotype 5 CV (%)	63.8	UGT2B17 EM Mean	1	Number of SC layers CV (%) : Male	20	UGT1A7 PM Mean	0			Liver : 4 NL (%)	3.48
Abundance : SLCO1B1 (OATP1B1) IT Freq	0.27	Turnover rate : CYP2C9 Allele 1 Genotype 5 Mean	0.0067	UGT2B17 EM Mean CV (%)	50	Water density gm/cm3 : Male	1	UGT1A7 PM Mean CV (%)	0			Liver : 4 NP (%)	2.52																			Transporter	Kidney ABCC4 (MRP4)
Abundance : SLCO1B1 (OATP1B1) UT Freq	0.07	Turnover rate : CYP2C9 Allele 1 Genotype 5 CV (%)	56	UGT2B17 PM Mean	0.08	Water density CV (%) : Male	0	UGT1A7 UM Mean	0			Liver : 4 IW (%)	58.6																			Fmax	1
Abundance : SLCO1B3 (OATP1B3) PT Freq	0	Abundance : CYP2C9 Allele 1 Genotype 6 Mean	23	UGT2B17 PM Mean CV (%)	50	SC lipids density gm/cm3 : Male	0.9	UGT1A7 UM Mean CV (%)	0			Liver : 4 AP (mg/g)	5.09																			Fbirth	1
Abundance : SLCO1B3 (OATP1B3) IT Freq	0	Abundance : CYP2C9 Allele 1 Genotype 6 CV (%)	60	UGT2B17 UM Mean	0	SC lipids density CV (%) : Male	0	UGT1A7 IM Mean	0			Liver : 4 KpALB	0.086																			Age50 (X50)	10
Abundance : SLCO1B3 (OATP1B3) UT Freq	0	Turnover rate : CYP2C9 Allele 1 Genotype 6 Mean	0.0067	UGT2B17 UM Mean CV (%)	0	SC proteins density gm/cm3 : Male	1.37	UGT1A7 IM Mean CV (%)	0			Liver : 4 KpLPP	0.161																			n(Agen)	1
Abundance : SLCO2B1 (OATP2B1) PT Freq	0	Turnover rate : CYP2C9 Allele 1 Genotype 6 CV (%)	56	UGT2B17 IM Mean	0.16	SC proteins density CV (%) : Male	0	UGT1A7 Absolute Abundance	7.1			Liver : 4 Local pH (IW)	7																			Age-cap	0
Abundance : SLCO2B1 (OATP2B1) IT Freq	0	Abundance : UGT1A1 EM Mean	1	UGT2B17 IM Mean CV (%)	50	Intercellular lipid thickness of SC µm : Male	0.091	UGT1A8 EM Mean	1			Liver : 4 Local pH (EW)	7.4																			Additional Function	No
Abundance : SLCO2B1 (OATP2B1) UT Freq	0	Abundance : UGT1A1 EM CV (%)	24	UGT2B17 Absolute Abundance	0	Intercellular lipid thickness of SC CV (%) : Male	0	UGT1A8 EM Mean CV (%)	60			Liver : 5 VS (%)	5
Abundance : SLCO4C1 (OATP4C1) PT Freq	0	Abundance : UGT1A1 PM Mean	0.42	UGT2B17 Mean Turnover Rate	1e-06	Tortuosity : Male	User Defined	UGT1A8 PM Mean	0			Liver : 5 EW (%)	16.5																			Transporter	Kidney SLC22A2 (OCT2)
Abundance : SLCO4C1 (OATP4C1) IT Freq	0	Abundance : UGT1A1 PM CV (%)	50.8	UGT2B17 Mean Turnover Rate CV (%)	30	Tortuosity of lipid diffusion pathway of SC : Male	12.7	UGT1A8 PM Mean CV (%)	0			Liver : 5 NL (%)	3.48																			Fmax	1
Abundance : SLCO4C1 (OATP4C1) UT Freq	0	Abundance : UGT1A1 UM Mean	1.46	UGT2B28 EM Mean	1	Tortuosity of lipid diffusion pathway of SC CV (%) : Male	18	UGT1A8 UM Mean	0			Liver : 5 NP (%)	2.52																			Fbirth	1e-06
Abundance : SLC22A1 (OCT1) PT Freq	0.0549	Abundance : UGT1A1 UM CV (%)	30	UGT2B28 EM Mean CV (%)	50	Hair follicle diameter µm : Male	77.7	UGT1A8 UM Mean CV (%)	0			Liver : 5 IW (%)	58.6																			Age50 (X50)	0.084
Abundance : SLC22A1 (OCT1) IT Freq	0.4043	Abundance : UGT1A1 IM Mean	0.72	UGT2B28 PM Mean	0	Hair follicle diameter CV (%) : Male	32	UGT1A8 IM Mean	0			Liver : 5 AP (mg/g)	5.09																			n(Agen)	1
Abundance : SLC22A1 (OCT1) UT Freq	0.0004	Abundance : UGT1A1 IM CV (%)	39.9	UGT2B28 PM Mean CV (%)	0	Hair follicle density N/cm2 : Male	18	UGT1A8 IM Mean CV (%)	0			Liver : 5 KpALB	0.086																			Age-cap	25
Abundance : SLC22A2 (OCT2) PT Freq	0	Absolute Abundance : UGT1A1	48	UGT2B28 UM Mean	0	Hair follicle density CV (%) : Male	39	UGT1A8 Absolute Abundance	5.6			Liver : 5 KpLPP	0.161																			Additional Function	No
Abundance : SLC22A2 (OCT2) IT Freq	0	Turnover rate : UGT1A1 Mean	0.0578	UGT2B28 UM Mean CV (%)	0	Hair follicle depth µm : Male	109.5	UGT1A9 EM Mean	1			Liver : 5 Local pH (IW)	7
Abundance : SLC22A2 (OCT2) UT Freq	0	Turnover rate : UGT1A1 CV (%)	30	UGT2B28 IM Mean	0	Hair follicle depth CV (%) : Male	0	UGT1A9 EM Mean CV (%)	60			Liver : 5 Local pH (EW)	7.4																			Transporter	Kidney SLC22A6 (OAT1)
Abundance : SLC22A3 (OCT3) PT Freq	0	Abundance : UGT1A3 EM Mean	1	UGT2B28 IM Mean CV (%)	0	Hair shaft diameter µm : Male	18	UGT1A9 PM Mean	0.07			Liver : 6 VS (%)	5																			Fmax	1
Abundance : SLC22A3 (OCT3) IT Freq	0	Abundance : UGT1A3 EM CV (%)	36	UGT2B28 Absolute Abundance	0	Hair shaft diameter CV (%) : Male	34	UGT1A9 PM Mean CV (%)	60			Liver : 6 EW (%)	16.5																			Fbirth	1e-06
Abundance : SLC22A3 (OCT3) UT Freq	0	Abundance : UGT1A3 PM Mean	0	UGT2B28 Mean Turnover Rate	1e-06	Sebum viscosity centipose : Male	40	UGT1A9 UM Mean	0			Liver : 6 NL (%)	3.48																			Age50 (X50)	0.379
Abundance : SLC22A4 (OCTN1) PT Freq	0	Abundance : UGT1A3 PM CV (%)	0	UGT2B28 Mean Turnover Rate CV (%)	30	Sebum viscosity CV (%) : Male	0	UGT1A9 UM Mean CV (%)	0			Liver : 6 NP (%)	2.52																			n(Agen)	0.43
Abundance : SLC22A4 (OCTN1) IT Freq	0	Abundance : UGT1A3 UM Mean	0	Use User UGT Option	Yes	Corneocyte pH [top] : Male	6.8	UGT1A9 IM Mean	0.19			Liver : 6 IW (%)	58.6																			Age-cap	25
Abundance : SLC22A4 (OCTN1) UT Freq	0	Abundance : UGT1A3 UM CV (%)	0	UGT User	1	Corneocyte pH [top] CV (%) : Male	6.8	UGT1A9 IM Mean CV (%)	60			Liver : 6 AP (mg/g)	5.09																			Additional Function	No
Abundance : SLC22A6 (OAT1) PT Freq	0	Abundance : UGT1A3 IM Mean	0	User UGT1 EM Mean	1	Corneocyte thickness [top] µm : Male	0.59	UGT1A9 Absolute Abundance	5.9			Liver : 6 KpALB	0.086
Abundance : SLC22A6 (OAT1) IT Freq	0	Abundance : UGT1A3 IM CV (%)	0	User UGT1 EM Mean CV (%)	50	Corneocyte thickness [top] CV (%) : Male	22	UGT1A10 EM Mean	1			Liver : 6 KpLPP	0.161																			Transporter	Kidney SLC22A8 (OAT3)
Abundance : SLC22A6 (OAT1) UT Freq	0	Absolute Abundance : UGT1A3	23	User UGT1 PM Mean	0	Corneocyte width [top] µm : Male	29.6	UGT1A10 EM Mean CV (%)	60			Liver : 6 Local pH (IW)	7																			Fmax	1
Abundance : SLC22A7 (OAT2) PT Freq	0	Turnover rate : UGT1A3 Mean	1e-06	User UGT1 PM Mean CV (%)	0	Corneocyte width [top] CV (%) : Male	5.9	UGT1A10 PM Mean	0			Liver : 6 Local pH (EW)	7.4																			Fbirth	1e-06
Abundance : SLC22A7 (OAT2) IT Freq	0	Turnover rate : UGT1A3 CV (%)	30	User UGT1 UM Mean	0	Corneocyte length [top] µm : Male	36.4	UGT1A10 PM Mean CV (%)	0																							Age50 (X50)	0.59
Abundance : SLC22A7 (OAT2) UT Freq	0	Abundance : UGT1A4 EM Mean	1	User UGT1 UM Mean CV (%)	0	Corneocyte length [top] CV (%) : Male	5.7	UGT1A10 UM Mean	0																							n(Agen)	0.51
Abundance : SLC22A8 (OAT3) PT Freq	0	Abundance : UGT1A4 EM CV (%)	26	User UGT1 IM Mean	0	Hydration level (% water volume) [top] : Male	33.9	UGT1A10 UM Mean CV (%)	0																							Age-cap	25
Abundance : SLC22A8 (OAT3) IT Freq	0	Abundance : UGT1A4 PM Mean	0	User UGT1 IM Mean CV (%)	0	Hydration level (% water volume) [top] CV (%) : Male	9	UGT1A10 IM Mean	0																							Additional Function	No
Abundance : SLC22A8 (OAT3) UT Freq	0	Abundance : UGT1A4 PM CV (%)	0	User UGT1 Absolute Abundance	0	SC lipid viscosity [top] centipose : Male	75	UGT1A10 IM Mean CV (%)	0
Abundance : SLC22A9 (OAT7) PT Freq	0	Abundance : UGT1A4 UM Mean	0	User UGT1 Mean Turnover Rate	1e-06	SC lipid viscosity [top] CV (%) : Male	0	UGT1A10 Absolute Abundance	4.3																							Transporter	Kidney SLC47As (MATEs)
Abundance : SLC22A9 (OAT7) IT Freq	0	Abundance : UGT1A4 UM CV (%)	0	User UGT1 Mean Turnover Rate CV (%)	30	Corneocyte pH [upper mid] : Male	6.8	UGT2B4 EM Mean	1																							Fmax	1
Abundance : SLC22A9 (OAT7) UT Freq	0	Abundance : UGT1A4 IM Mean	0	Use User Cytosolic Enzyme Option	Yes	Corneocyte pH [upper mid] CV (%) : Male	6.8	UGT2B4 EM Mean CV (%)	60																							Fbirth	1
Abundance : SLC29A1 (ENT1) PT Freq	0	Abundance : UGT1A4 IM CV (%)	0	User Cyt	1	Corneocyte thickness [upper mid] µm : Male	0.67	UGT2B4 PM Mean	0																							Age50 (X50)	10
Abundance : SLC29A1 (ENT1) IT Freq	0	Absolute Abundance : UGT1A4	52	User Cyt1 EM Mean	1	Corneocyte thickness [upper mid] CV (%) : Male	22	UGT2B4 PM Mean CV (%)	0																							n(Agen)	1
Abundance : SLC29A1 (ENT1) UT Freq	0	Turnover rate : UGT1A4 Mean	1e-06	User Cyt1 EM Mean CV (%)	30	Corneocyte width [upper mid] µm : Male	29.6	UGT2B4 UM Mean	0																							Age-cap	0
Abundance : SLC29A2 (ENT2) PT Freq	0	Turnover rate : UGT1A4 CV (%)	30	User Cyt1 PM Mean	0	Corneocyte width [upper mid] CV (%) : Male	5.9	UGT2B4 UM Mean CV (%)	0																							Additional Function	No
Abundance : SLC29A2 (ENT2) IT Freq	0	Abundance : UGT1A5 EM Mean	1	User Cyt1 PM Mean CV (%)	0	Corneocyte length [upper mid] µm : Male	36.4	UGT2B4 IM Mean	0
Abundance : SLC29A2 (ENT2) UT Freq	0	Abundance : UGT1A5 EM CV (%)	30	User Cyt1 UM Mean	0	Corneocyte length [upper mid] CV (%) : Male	5.7	UGT2B4 IM Mean CV (%)	0																							Transporter	Apical Influx
Abundance : SLC47A1 (MATE1) PT Freq	0	Abundance : UGT1A5 PM Mean	0	User Cyt1 UM Mean CV (%)	0	Hydration level (% water volume) [upper mid] : Male	44.6987	UGT2B4 Absolute Abundance	0																							Fmax	1
Abundance : SLC47A1 (MATE1) IT Freq	0	Abundance : UGT1A5 PM CV (%)	0	User Cyt1 IM Mean	0	Hydration level (% water volume) [upper mid] CV (%) : Male	6	UGT2B7 EM Mean	1																							Fbirth	1
Abundance : SLC47A1 (MATE1) UT Freq	0	Abundance : UGT1A5 UM Mean	0	User Cyt1 IM Mean CV (%)	0	SC lipid viscosity [upper mid] centipose : Male	75	UGT2B7 EM Mean CV (%)	60																							Age50 (X50)	10
Abundance : SLC47As (MATEs) PT Freq	0	Abundance : UGT1A5 UM CV (%)	0	Use User Cytosolic Enzyme Option	Yes	SC lipid viscosity [upper mid] CV (%) : Male	0	UGT2B7 PM Mean	0																							n(Agen)	1
Abundance : SLC47As (MATEs) IT Freq	0	Abundance : UGT1A5 IM Mean	0	User Cyt	2	Corneocyte pH [lower mid] : Male	6.8	UGT2B7 PM Mean CV (%)	0																							Age-cap	0
Abundance : SLC47As (MATEs) UT Freq	0	Abundance : UGT1A5 IM CV (%)	0	User Cyt2 EM Mean	1	Corneocyte pH [lower mid] CV (%) : Male	6.8	UGT2B7 UM Mean	0																							Additional Function	No
Abundance : SLC51A/B (OST-α/β) PT Freq	0	Absolute Abundance : UGT1A5	0	User Cyt2 EM Mean CV (%)	30	Corneocyte thickness [lower mid] µm : Male	0.76	UGT2B7 UM Mean CV (%)	0
Abundance : SLC51A/B (OST-α/β) IT Freq	0	Turnover rate : UGT1A5 Mean	1e-06	User Cyt2 PM Mean	0	Corneocyte thickness [lower mid] CV (%) : Male	22	UGT2B7 IM Mean	0																							Transporter	Basolateral Efflux (Kidney)
Abundance : SLC51A/B (OST-α/β) UT Freq	0	Turnover rate : UGT1A5 CV (%)	30	User Cyt2 PM Mean CV (%)	0	Corneocyte width [lower mid] µm : Male	29.6	UGT2B7 IM Mean CV (%)	0																							Fmax	0
Abundance : Apical Influx (Intestine) PT Freq	0	Abundance : UGT1A6 EM Mean	1	User Cyt2 UM Mean	0	Corneocyte width [lower mid] CV (%) : Male	5.9	UGT2B7 Absolute Abundance	4.5																							Fbirth	0
Abundance : Apical Influx (Intestine) IT Freq	0	Abundance : UGT1A6 EM CV (%)	30	User Cyt2 UM Mean CV (%)	0	Corneocyte length [lower mid] µm : Male	36.4	UGT2B10 EM Mean	1																							Age50 (X50)	0
Abundance : Apical Influx (Intestine) UT Freq	0	Abundance : UGT1A6 PM Mean	0	User Cyt2 IM Mean	0	Corneocyte length [lower mid] CV (%) : Male	5.7	UGT2B10 EM Mean CV (%)	60																							n(Agen)	0
Abundance : Apical Efflux (Intestine) PT Freq	0	Abundance : UGT1A6 PM CV (%)	0	User Cyt2 IM Mean CV (%)	0	Hydration level (% water volume) [lower mid] : Male	55.5388	UGT2B10 PM Mean	0																							Age-cap	0
Abundance : Apical Efflux (Intestine) IT Freq	0	Abundance : UGT1A6 UM Mean	0	Use User Cytosolic Enzyme Option	Yes	Hydration level (% water volume) [lower mid] CV (%) : Male	5	UGT2B10 PM Mean CV (%)	0																							Additional Function	No
Abundance : Apical Efflux (Intestine) UT Freq	0	Abundance : UGT1A6 UM CV (%)	0	User Cyt	3	SC lipid viscosity [lower mid] centipose : Male	75	UGT2B10 UM Mean	0
Abundance : Sinusoidal Uptake (Liver) PT Freq	0	Abundance : UGT1A6 IM Mean	0	User Cyt3 EM Mean	1	SC lipid viscosity [lower mid] CV (%) : Male	0	UGT2B10 UM Mean CV (%)	0																							Adipose Volume Male CV (%)	0
Abundance : Sinusoidal Uptake (Liver) IT Freq	0	Abundance : UGT1A6 IM CV (%)	0	User Cyt3 EM Mean CV (%)	30	Corneocyte pH [bottom] : Male	6.8	UGT2B10 IM Mean	0																							Adipose Volume Female CV (%)	0
Abundance : Sinusoidal Uptake (Liver) UT Freq	0	Absolute Abundance : UGT1A6	20	User Cyt3 PM Mean	0	Corneocyte pH [bottom] CV (%) : Male	6.8	UGT2B10 IM Mean CV (%)	0																							Bone Volume Male CV (%)	0
Abundance : Sinusoidal Efflux (Liver) PT Freq	0	Turnover rate : UGT1A6 Mean	1e-06	User Cyt3 PM Mean CV (%)	0	Corneocyte thickness [bottom] µm : Male	0.86	UGT2B10 Absolute Abundance	0.1																							Bone Volume Feale CV (%)	0
Abundance : Sinusoidal Efflux (Liver) IT Freq	0	Turnover rate : UGT1A6 CV (%)	30	User Cyt3 UM Mean	0	Corneocyte thickness [bottom] CV (%) : Male	22	UGT2B11 EM Mean	1																							Brain Volume Male CV (%)	0
Abundance : Sinusoidal Efflux (Liver) UT Freq	0	Abundance : UGT1A7 EM Mean	1	User Cyt3 UM Mean CV (%)	0	Corneocyte width [bottom] µm : Male	29.6	UGT2B11 EM Mean CV (%)	60																							Brain Volume Female CV (%)	0
Abundance : Canalicular Efflux (Liver) PT Freq	0	Abundance : UGT1A7 EM CV (%)	30	User Cyt3 IM Mean	0	Corneocyte width [bottom] CV (%) : Male	5.9	UGT2B11 PM Mean	0																							Gut Volume Male CV (%)	0
Abundance : Canalicular Efflux (Liver) IT Freq	0	Abundance : UGT1A7 PM Mean	0	User Cyt3 IM Mean CV (%)	0	Corneocyte length [bottom] µm : Male	36.4	UGT2B11 PM Mean CV (%)	0																							Gut Volume Female CV (%)	0
Abundance : Canalicular Efflux (Liver) UT Freq	0	Abundance : UGT1A7 PM CV (%)	0	Use User Cytosolic Enzyme Option	Yes	Corneocyte length [bottom] CV (%) : Male	5.7	UGT2B11 UM Mean	0																							Heart Volume Male CV (%)	0
Abundance : Apical Influx (Kidney) PT Freq	0	Abundance : UGT1A7 UM Mean	0	User Cyt	4	Hydration level (% water volume) [bottom] : Male	66.4	UGT2B11 UM Mean CV (%)	0																							Heart Volume Female CV (%)	0
Abundance : Apical Influx (Kidney) IT Freq	0	Abundance : UGT1A7 UM CV (%)	0	User Cyt4 EM Mean	1	Hydration level (% water volume) [bottom] CV (%) : Male	4	UGT2B11 IM Mean	0																							Lung Volume Male CV (%)	0
Abundance : Apical Influx (Kidney) UT Freq	0	Abundance : UGT1A7 IM Mean	0	User Cyt4 EM Mean CV (%)	30	SC lipid viscosity [bottom] centipose : Male	75	UGT2B11 IM Mean CV (%)	0																							Lung Volume Female CV (%)	0
Abundance : Basolateral Efflux (Kidney) PT Freq	0	Abundance : UGT1A7 IM CV (%)	0	User Cyt4 PM Mean	0	SC lipid viscosity [bottom] CV (%) : Male	0	UGT2B11 Absolute Abundance	0																							Muscle Volume Male CV (%)	0
Abundance : Basolateral Efflux (Kidney) IT Freq	0	Absolute Abundance : UGT1A7	0	User Cyt4 PM Mean CV (%)	0	Viable Epidermis thickness µm : Male	41.9655	UGT2B15 EM Mean	1																							Muscle Volume Female CV (%)	0
Abundance : Basolateral Efflux (Kidney) UT Freq	0	Turnover rate : UGT1A7 Mean	1e-06	User Cyt4 UM Mean	0	Viable Epidermis thickness CV (%) : Male	19	UGT2B15 EM Mean CV (%)	60																							Pancreas Volume Male CV (%)	0
Abundance : Basolateral Influx (Intestine) PT Freq	0	Turnover rate : UGT1A7 CV (%)	30	User Cyt4 UM Mean CV (%)	0	Dermis thickness µm : Male	1240	UGT2B15 PM Mean	0.07																							Pancreas Volume Female CV (%)	0
Abundance : Basolateral Influx (Intestine) IT Freq	0	Abundance : UGT1A8 EM Mean	1	User Cyt4 IM Mean	0	Dermis thickness CV (%) : Male	20	UGT2B15 PM Mean CV (%)	60																							Skin Volume Male CV (%)	0
Abundance : Basolateral Influx (Intestine) UT Freq	0	Abundance : UGT1A8 EM CV (%)	30	User Cyt4 IM Mean CV (%)	0	Subcutis thickness mm : Male	1.91	UGT2B15 UM Mean	0																							Skin Volume Female CV (%)	0
Abundance : Basolateral Efflux (Intestine) PT Freq	0	Abundance : UGT1A8 PM Mean	0	CES1 EM Mean	1	Subcutis thickness CV (%) : Male	55.7	UGT2B15 UM Mean CV (%)	0																							Spleen Volume Male CV (%)	0
Abundance : Basolateral Efflux (Intestine) IT Freq	0	Abundance : UGT1A8 PM CV (%)	0	CES1 EM CV (%)	30	Muscle thickness mm : Male	29.88	UGT2B15 IM Mean	0.47																							Spleen Volume Female CV (%)	0
Abundance : Basolateral Efflux (Intestine) UT Freq	0	Abundance : UGT1A8 UM Mean	0	CES1 PM Mean	0.11	Muscle thickness CV (%) : Male	61.44	UGT2B15 IM Mean CV (%)	60																							Blood Volume Male CV (%)	0
		Abundance : UGT1A8 UM CV (%)	0	CES1 PM CV (%)	30	Dermis regional blood flow scalar : Male	0.909226	UGT2B15 Absolute Abundance	0.1																							Blood Volume Female CV (%)	0
		Abundance : UGT1A8 IM Mean	0	CES1 UM Mean	0	Dermis regional blood flow scalar CV (%) : Male	0	UGT2B17 EM Mean	1																							Site:	ForeHead
		Abundance : UGT1A8 IM CV (%)	0	CES1 UM CV (%)	0	Subcutis regional blood flow scalar : Male	1	UGT2B17 EM Mean CV (%)	60																							Parameter:	Skin Surface pH
		Absolute Abundance : UGT1A8	0	CES1 IM Mean	0	Subcutis regional blood flow scalar CV (%) : Male	0	UGT2B17 PM Mean	0.08																							Exponential C0	1.01
		Turnover rate : UGT1A8 Mean	1e-06	CES1 IM CV (%)	0	Muscle regional blood flow scalar : Male	1	UGT2B17 PM Mean CV (%)	60																							Exponential C1	0.2
		Turnover rate : UGT1A8 CV (%)	30	CES2 EM Mean	1	Muscle regional blood flow scalar CV (%) : Male	0	UGT2B17 UM Mean	0																							Exponential C2	22.13
		Abundance : UGT1A9 EM Mean	1	CES2 EM CV (%)	30			UGT2B17 UM Mean CV (%)	0																							Parameter:	SC Thickness
		Abundance : UGT1A9 EM CV (%)	30	CES2 PM Mean	0	MPMLA - Forearm Outer (dorsal)		UGT2B17 IM Mean	0.16																							Sigmoidal Male FBirth	0.5
		Abundance : UGT1A9 PM Mean	0.07	CES2 PM CV (%)	0	Skin surface pH : Male	4.5	UGT2B17 IM Mean CV (%)	60																							Sigmoidal Male AdultMax	1.01
		Abundance : UGT1A9 PM CV (%)	30	CES2 UM Mean	0	Skin surface pH CV (%) : Male	8.2	UGT2B17 Absolute Abundance	11																							Sigmoidal Male Age50	2.72
		Abundance : UGT1A9 UM Mean	0	CES2 UM CV (%)	0	Skin temperature °C : Male	32	UGT2B28 EM Mean	1																							Sigmoidal Male n	3.43
		Abundance : UGT1A9 UM CV (%)	0	CES2 IM Mean	0	Skin temperature CV (%) : Male	0	UGT2B28 EM Mean CV (%)	60																							Sigmoidal Female FBirth	0.5
		Abundance : UGT1A9 IM Mean	0.19	CES2 IM CV (%)	0	Shape of corneocyte : Male	Cuboid (brick)	UGT2B28 PM Mean	0																							Sigmoidal Female AdultMax	1.01
		Abundance : UGT1A9 IM CV (%)	30	Use User ES Option	Yes	Shape of corneocyte : Female	Cuboid (brick)	UGT2B28 PM Mean CV (%)	0																							Sigmoidal Female Age50	2.72
		Absolute Abundance : UGT1A9	31	User ES EM Mean	1	Number of SC layers : Male	22	UGT2B28 UM Mean	0																							Sigmoidal Female n	3.43
		Turnover rate : UGT1A9 Mean	1e-06	User ES EM CV (%)	30	Number of SC layers CV (%) : Male	20	UGT2B28 UM Mean CV (%)	0																							Parameter:	Viable Epidermis Thickness
		Turnover rate : UGT1A9 CV (%)	30	User ES PM Mean	0	Water density gm/cm3 : Male	1	UGT2B28 IM Mean	0																							Sigmoidal Male FBirth	0.64
		Abundance : UGT1A10 EM Mean	1	User ES PM CV (%)	0	Water density CV (%) : Male	0	UGT2B28 IM Mean CV (%)	0																							Sigmoidal Male AdultMax	1.04
		Abundance : UGT1A10 EM CV (%)	30	User ES UM Mean	0	SC lipids density gm/cm3 : Male	0.9	UGT2B28 Absolute Abundance	0																							Sigmoidal Male Age50	14.31
		Abundance : UGT1A10 PM Mean	0	User ES UM CV (%)	0	SC lipids density CV (%) : Male	0	Use User UGT Option	Yes																							Sigmoidal Male n	4.18
		Abundance : UGT1A10 PM CV (%)	0	User ES IM Mean	0	SC proteins density gm/cm3 : Male	1.37	UGT User	1																							Sigmoidal Female FBirth	0.64
		Abundance : UGT1A10 UM Mean	0	User ES IM CV (%)	0	SC proteins density CV (%) : Male	0	User UGT1 EM Mean	1																							Sigmoidal Female AdultMax	1.04
		Abundance : UGT1A10 UM CV (%)	0	EM Mean	0	Intercellular lipid thickness of SC µm : Male	0.091	User UGT1 EM Mean CV (%)	60																							Sigmoidal Female Age50	14.31
		Abundance : UGT1A10 IM Mean	0	EM CV (%)	0	Intercellular lipid thickness of SC CV (%) : Male	0	User UGT1 PM Mean	0																							Sigmoidal Female n	4.18
		Abundance : UGT1A10 IM CV (%)	0	PM Mean	0	Tortuosity : Male	User Defined	User UGT1 PM Mean CV (%)	0																							Parameter:	Total Skin Thickness
		Absolute Abundance : UGT1A10	0.02	PM CV (%)	0	Tortuosity of lipid diffusion pathway of SC : Male	12.7	User UGT1 UM Mean	0																							Sigmoidal Male FBirth	0.72
		Turnover rate : UGT1A10 Mean	1e-06	UM Mean	0	Tortuosity of lipid diffusion pathway of SC CV (%) : Male	18	User UGT1 UM Mean CV (%)	0																							Sigmoidal Male AdultMax	1.01
		Turnover rate : UGT1A10 CV (%)	30	UM CV (%)	0	Hair follicle diameter µm : Male	77.7	User UGT1 IM Mean	0																							Sigmoidal Male Age50	16.5
		Abundance : UGT2B4 EM Mean	1	IM Mean	0	Hair follicle diameter CV (%) : Male	32	User UGT1 IM Mean CV (%)	0																							Sigmoidal Male n	6.09
		Abundance : UGT2B4 EM CV (%)	28	IM CV (%)	0	Hair follicle density N/cm2 : Male	18	User UGT1 Absolute Abundance	0																							Sigmoidal Female FBirth	0.72
		Abundance : UGT2B4 PM Mean	0	EM Mean	0	Hair follicle density CV (%) : Male	39	Use User Cytosolic Enzyme Option	Yes																							Sigmoidal Female AdultMax	1.01
		Abundance : UGT2B4 PM CV (%)	0	EM CV (%)	0	Hair follicle depth µm : Male	109.5	User Cyt	1																							Sigmoidal Female Age50	16.5
		Abundance : UGT2B4 UM Mean	0	PM Mean	0	Hair follicle depth CV (%) : Male	0	User Cyt1 EM Mean	1																							Sigmoidal Female n	6.09
		Abundance : UGT2B4 UM CV (%)	0	PM CV (%)	0	Hair shaft diameter µm : Male	18	User Cyt1 EM Mean CV (%)	60																							Parameter:	Local Subcutaneous Thickness
		Abundance : UGT2B4 IM Mean	0	UM Mean	0	Hair shaft diameter CV (%) : Male	34	User Cyt1 PM Mean	0																							Sigmoidal Male FBirth	0.67
		Abundance : UGT2B4 IM CV (%)	0	UM CV (%)	0	Sebum viscosity centipose : Male	40	User Cyt1 PM Mean CV (%)	0																							Sigmoidal Male AdultMax	1.19
		Absolute Abundance : UGT2B4	54	IM Mean	0	Sebum viscosity CV (%) : Male	0	User Cyt1 UM Mean	0																							Sigmoidal Male Age50	16.21
		Turnover rate : UGT2B4 Mean	1e-06	IM CV (%)	0	Corneocyte pH [top] : Male	6.8	User Cyt1 UM Mean CV (%)	0																							Sigmoidal Male n	1.6
		Turnover rate : UGT2B4 CV (%)	30	FMO1 Absolute Abundance	5	Corneocyte pH [top] CV (%) : Male	6.8	User Cyt1 IM Mean	0																							Sigmoidal Female FBirth	0.37
		Abundance : UGT2B7 EM Mean	1	FMO1 EM Mean	1	Corneocyte thickness [top] µm : Male	0.69	User Cyt1 IM Mean CV (%)	0																							Sigmoidal Female AdultMax	1.38
		Abundance : UGT2B7 EM CV (%)	30.4	FMO1 EM CV (%)	35	Corneocyte thickness [top] CV (%) : Male	22	Use User Cytosolic Enzyme Option	Yes																							Sigmoidal Female Age50	17.3
		Abundance : UGT2B7 PM Mean	0	FMO1 PM Mean	0	Corneocyte width [top] µm : Male	29.6	User Cyt	2																							Sigmoidal Female n	1.83
		Abundance : UGT2B7 PM CV (%)	0	FMO1 PM CV (%)	0	Corneocyte width [top] CV (%) : Male	5.9	User Cyt2 EM Mean	1																							Parameter:	Local Muscle Thickness
		Abundance : UGT2B7 UM Mean	0	FMO1 UM Mean	0	Corneocyte length [top] µm : Male	36.4	User Cyt2 EM Mean CV (%)	60																							Linear C0	0.385
		Abundance : UGT2B7 UM CV (%)	0	FMO1 UM CV (%)	0	Corneocyte length [top] CV (%) : Male	5.7	User Cyt2 PM Mean	0																							Linear C1	0.014
		Abundance : UGT2B7 IM Mean	0	FMO1 IM Mean	0	Hydration level (% water volume) [top] : Male	33.9	User Cyt2 PM Mean CV (%)	0
		Abundance : UGT2B7 IM CV (%)	0	FMO1 IM CV (%)	0	Hydration level (% water volume) [top] CV (%) : Male	9	User Cyt2 UM Mean	0																							Site:	ForearmInner
		Absolute Abundance : UGT2B7	71	FMO3 Absolute Abundance	0.47	SC lipid viscosity [top] centipose : Male	75	User Cyt2 UM Mean CV (%)	0																							Parameter:	Skin Surface pH
		Turnover rate : UGT2B7 Mean	1e-06	FMO3 EM Mean	1	SC lipid viscosity [top] CV (%) : Male	0	User Cyt2 IM Mean	0																							Exponential C0	1.01
		Turnover rate : UGT2B7 CV (%)	30	FMO3 EM CV (%)	79	Corneocyte pH [upper mid] : Male	6.8	User Cyt2 IM Mean CV (%)	0																							Exponential C1	0.35
		Abundance : UGT2B10 EM Mean	1	FMO3 PM Mean	0	Corneocyte pH [upper mid] CV (%) : Male	6.8	Use User Cytosolic Enzyme Option	Yes																							Exponential C2	27.61
		Abundance : UGT2B10 EM CV (%)	30	FMO3 PM CV (%)	0	Corneocyte thickness [upper mid] µm : Male	0.79	User Cyt	3																							Parameter:	SC Thickness
		Abundance : UGT2B10 PM Mean	0	FMO3 UM Mean	0	Corneocyte thickness [upper mid] CV (%) : Male	22	User Cyt3 EM Mean	1																							Sigmoidal Male FBirth	0.5
		Abundance : UGT2B10 PM CV (%)	0	FMO3 UM CV (%)	0	Corneocyte width [upper mid] µm : Male	29.6	User Cyt3 EM Mean CV (%)	60																							Sigmoidal Male AdultMax	1.01
		Abundance : UGT2B10 UM Mean	0	FMO3 IM Mean	0	Corneocyte width [upper mid] CV (%) : Male	5.9	User Cyt3 PM Mean	0																							Sigmoidal Male Age50	2.72
		Abundance : UGT2B10 UM CV (%)	0	FMO3 IM CV (%)	0	Corneocyte length [upper mid] µm : Male	36.4	User Cyt3 PM Mean CV (%)	0																							Sigmoidal Male n	3.43
		Abundance : UGT2B10 IM Mean	0	FMO5 Absolute Abundance	2.6	Corneocyte length [upper mid] CV (%) : Male	5.7	User Cyt3 UM Mean	0																							Sigmoidal Female FBirth	0.5
		Abundance : UGT2B10 IM CV (%)	0	FMO5 EM Mean	1	Hydration level (% water volume) [upper mid] : Male	44.6987	User Cyt3 UM Mean CV (%)	0																							Sigmoidal Female AdultMax	1.01
		Absolute Abundance : UGT2B10	6.5	FMO5 EM CV (%)	57	Hydration level (% water volume) [upper mid] CV (%) : Male	6	User Cyt3 IM Mean	0																							Sigmoidal Female Age50	2.72
		Turnover rate : UGT2B10 Mean	1e-06	FMO5 PM Mean	0	SC lipid viscosity [upper mid] centipose : Male	75	User Cyt3 IM Mean CV (%)	0																							Sigmoidal Female n	3.43
		Turnover rate : UGT2B10 CV (%)	30	FMO5 PM CV (%)	0	SC lipid viscosity [upper mid] CV (%) : Male	0	Use User Cytosolic Enzyme Option	Yes																							Parameter:	Viable Epidermis Thickness
		Abundance : UGT2B11 EM Mean	1	FMO5 UM Mean	0	Corneocyte pH [lower mid] : Male	6.8	User Cyt	4																							Sigmoidal Male FBirth	0.64
		Abundance : UGT2B11 EM CV (%)	30	FMO5 UM CV (%)	0	Corneocyte pH [lower mid] CV (%) : Male	6.8	User Cyt4 EM Mean	1																							Sigmoidal Male AdultMax	1.04
		Abundance : UGT2B11 PM Mean	0	FMO5 IM Mean	0	Corneocyte thickness [lower mid] µm : Male	0.89	User Cyt4 EM Mean CV (%)	60																							Sigmoidal Male Age50	14.31
		Abundance : UGT2B11 PM CV (%)	0	FMO5 IM CV (%)	0	Corneocyte thickness [lower mid] CV (%) : Male	22	User Cyt4 PM Mean	0																							Sigmoidal Male n	4.18
		Abundance : UGT2B11 UM Mean	0	FMOUser Absolute Abundance	0	Corneocyte width [lower mid] µm : Male	29.6	User Cyt4 PM Mean CV (%)	0																							Sigmoidal Female FBirth	0.64
		Abundance : UGT2B11 UM CV (%)	0	FMOUser EM Mean	1	Corneocyte width [lower mid] CV (%) : Male	5.9	User Cyt4 UM Mean	0																							Sigmoidal Female AdultMax	1.04
		Abundance : UGT2B11 IM Mean	0	FMOUser EM CV (%)	30	Corneocyte length [lower mid] µm : Male	36.4	User Cyt4 UM Mean CV (%)	0																							Sigmoidal Female Age50	14.31
		Abundance : UGT2B11 IM CV (%)	0	FMOUser PM Mean	0	Corneocyte length [lower mid] CV (%) : Male	5.7	User Cyt4 IM Mean	0																							Sigmoidal Female n	4.18
		Absolute Abundance : UGT2B11	0	FMOUser PM CV (%)	0	Hydration level (% water volume) [lower mid] : Male	55.5388	User Cyt4 IM Mean CV (%)	0																							Parameter:	Total Skin Thickness
		Turnover rate : UGT2B11 Mean	1e-06	FMOUser UM Mean	0	Hydration level (% water volume) [lower mid] CV (%) : Male	5	CES1 EM Mean	1																							Sigmoidal Male FBirth	0.72
		Turnover rate : UGT2B11 CV (%)	30	FMOUser UM CV (%)	0	SC lipid viscosity [lower mid] centipose : Male	75	CES1 EM CV (%)	30																							Sigmoidal Male AdultMax	1.01
		Abundance : UGT2B15 EM Mean	1	FMOUser IM Mean	0	SC lipid viscosity [lower mid] CV (%) : Male	0	CES1 PM Mean	0.11																							Sigmoidal Male Age50	16.5
		Abundance : UGT2B15 EM CV (%)	34	FMOUser IM CV (%)	0	Corneocyte pH [bottom] : Male	6.8	CES1 PM CV (%)	30																							Sigmoidal Male n	6.09
		Abundance : UGT2B15 PM Mean	0.07	Cortex/Medulla Ratio	0.92	Corneocyte pH [bottom] CV (%) : Male	6.8	CES1 UM Mean	0																							Sigmoidal Female FBirth	0.72
		Abundance : UGT2B15 PM CV (%)	33	Peritubular Capillary (% Kidney volume)	7	Corneocyte thickness [bottom] µm : Male	1	CES1 UM CV (%)	0																							Sigmoidal Female AdultMax	1.01
		Abundance : UGT2B15 UM Mean	0	Million Nephrons per Subject Baseline	0.22693	Corneocyte thickness [bottom] CV (%) : Male	22	CES1 IM Mean	0																							Sigmoidal Female Age50	16.5
		Abundance : UGT2B15 UM CV (%)	0	Kidney Weight Coefficient	0.003948	Corneocyte width [bottom] µm : Male	29.6	CES1 IM CV (%)	0																							Sigmoidal Female n	6.09
		Abundance : UGT2B15 IM Mean	0.47	Proximal Tubule Length (mm)	18	Corneocyte width [bottom] CV (%) : Male	5.9	CES2 EM Mean	1																							Parameter:	Local Subcutaneous Thickness
		Abundance : UGT2B15 IM CV (%)	37	Henle's Loop Length (mm)	7	Corneocyte length [bottom] µm : Male	36.4	CES2 EM CV (%)	30																							Sigmoidal Male FBirth	0.67
		Absolute Abundance : UGT2B15	39	Distal Tubule Length (mm)	5.5	Corneocyte length [bottom] CV (%) : Male	5.7	CES2 PM Mean	0																							Sigmoidal Male AdultMax	1.19
		Turnover rate : UGT2B15 Mean	1e-06	Collecting Duct Length (mm)	22	Hydration level (% water volume) [bottom] : Male	66.4	CES2 PM CV (%)	0																							Sigmoidal Male Age50	16.21
		Turnover rate : UGT2B15 CV (%)	30	Proximal Tubule Diameter (mm)	0.06	Hydration level (% water volume) [bottom] CV (%) : Male	4	CES2 UM Mean	0																							Sigmoidal Male n	1.6
		Abundance : UGT2B17 EM Mean	1	Henle's Loop Diameter (mm)	0.018	SC lipid viscosity [bottom] centipose : Male	75	CES2 UM CV (%)	0																							Sigmoidal Female FBirth	0.37
		Abundance : UGT2B17 EM CV (%)	28	Distal Tubule Diameter (mm)	0.05	SC lipid viscosity [bottom] CV (%) : Male	0	CES2 IM Mean	0																							Sigmoidal Female AdultMax	1.38
		Abundance : UGT2B17 PM Mean	0.08	Collecting Duct Diameter (mm)	0.2	Viable Epidermis thickness µm : Male	53.5684	CES2 IM CV (%)	0																							Sigmoidal Female Age50	17.3
		Abundance : UGT2B17 PM CV (%)	40	Proximal Tubule pH	7.4	Viable Epidermis thickness CV (%) : Male	21	Use User ES Option	Yes																							Sigmoidal Female n	1.83
		Abundance : UGT2B17 UM Mean	0	Henle's Loop pH	7.4	Dermis thickness µm : Male	1240	User ES EM Mean	1																							Parameter:	Local Muscle Thickness
		Abundance : UGT2B17 UM CV (%)	0	Distal Tubule pH	7.4	Dermis thickness CV (%) : Male	20	User ES EM CV (%)	30																							Linear C0	11.8
		Abundance : UGT2B17 IM Mean	0.16	Collecting Duct pH	7.4	Subcutis thickness mm : Male	1.91	User ES PM Mean	0																							Linear C1	0.18
		Abundance : UGT2B17 IM CV (%)	30	GFR Male Input Type	Predicted	Subcutis thickness CV (%) : Male	55.7	User ES PM CV (%)	0
		Absolute Abundance : UGT2B17	5.9	Male - Proximal Tubule Urine Flow Rate - GFR (mL/min)	130	Muscle thickness mm : Male	29.88	User ES UM Mean	0																							Site:	ForearmOuter
		Turnover rate : UGT2B17 Mean	1e-06	Male - Henle's Loop Urine Flow Rate (mL/min)	46.77	Muscle thickness CV (%) : Male	61.44	User ES UM CV (%)	0																							Parameter:	Skin Surface pH
		Turnover rate : UGT2B17 CV (%)	30	Male - Distal Tubule Urine Flow Rate (mL/min)	25.97	Dermis regional blood flow scalar : Male	0.5875	User ES IM Mean	0																							Exponential C0	1.01
		Abundance : UGT2B28 EM Mean	1	Male - Collecting Duct Urine Flow Rate (mL/min)	12.44	Dermis regional blood flow scalar CV (%) : Male	0	User ES IM CV (%)	0																							Exponential C1	0.35
		Abundance : UGT2B28 EM CV (%)	30	Male - Urine Flow Rate into Bladder (mL/min)	1	Subcutis regional blood flow scalar : Male	1	EM Mean	0																							Exponential C2	27.61
		Abundance : UGT2B28 PM Mean	0	GFR Female Input Type	Predicted	Subcutis regional blood flow scalar CV (%) : Male	0	EM CV (%)	0																							Parameter:	SC Thickness
		Abundance : UGT2B28 PM CV (%)	0	Female - Proximal Tubule Urine Flow Rate - GFR (mL/min)	120	Muscle regional blood flow scalar : Male	1	PM Mean	0																							Sigmoidal Male FBirth	0.5
		Abundance : UGT2B28 UM Mean	0	Female - Henle's Loop Urine Flow Rate (mL/min)	43.23	Muscle regional blood flow scalar CV (%) : Male	0	PM CV (%)	0																							Sigmoidal Male AdultMax	1.01
		Abundance : UGT2B28 UM CV (%)	0	Female - Distal Tubule Urine Flow Rate (mL/min)	24.03			UM Mean	0																							Sigmoidal Male Age50	2.72
		Abundance : UGT2B28 IM Mean	0	Female - Collecting Duct Urine Flow Rate (mL/min)	11.56	MPMLA - Upper Arm		UM CV (%)	0																							Sigmoidal Male n	3.43
		Abundance : UGT2B28 IM CV (%)	0	Female - Urine Flow Rate into Bladder (mL/min)	1	Skin surface pH : Male	5.5	IM Mean	0																							Sigmoidal Female FBirth	0.5
		Absolute Abundance : UGT2B28	0	Bypass 1 before Glomerulus (%)	10	Skin surface pH CV (%) : Male	11.1	IM CV (%)	0																							Sigmoidal Female AdultMax	1.01
		Turnover rate : UGT2B28 Mean	1e-06	Bypass 1 before Glomerulus CV (%)	30	Skin temperature °C : Male	32	EM Mean	0																							Sigmoidal Female Age50	2.72
		Turnover rate : UGT2B28 CV (%)	30	Bypass 2 to Henle's Loop & Medu-CD (%)	20	Skin temperature CV (%) : Male	0	EM CV (%)	0																							Sigmoidal Female n	3.43
		Use User UGT Option	Yes	Bypass 2 to Henle's Loop & Medu-CD CV (%)	30	Shape of corneocyte : Male	Cuboid (brick)	PM Mean	0																							Parameter:	Viable Epidermis Thickness
		UGT User	1	PT-S1 ABCB1 (MDR1/P-gp) / 106 PTC (Relative Values)	1	Shape of corneocyte : Female	Cuboid (brick)	PM CV (%)	0																							Sigmoidal Male FBirth	0.64
		Abundance : User UGT1 EM Mean	1	PT-S1 ABCC4 (MRP4) / 106 PTC (Relative Values)	1	Number of SC layers : Male	18	UM Mean	0																							Sigmoidal Male AdultMax	1.04
		Abundance : User UGT1 EM CV (%)	30	PT-S1 SLC22A2 (OCT2) / 106 PTC (Relative Values)	1	Number of SC layers CV (%) : Male	22	UM CV (%)	0																							Sigmoidal Male Age50	14.31
		Abundance : User UGT1 PM Mean	0	PT-S1 SLC22A6 (OAT1) / 106 PTC (Relative Values)	1	Water density gm/cm3 : Male	1	IM Mean	0																							Sigmoidal Male n	4.18
		Abundance : User UGT1 PM CV (%)	0	PT-S1 SLC22A8 (OAT3) / 106 PTC (Relative Values)	1	Water density CV (%) : Male	0	IM CV (%)	0																							Sigmoidal Female FBirth	0.64
		Abundance : User UGT1 UM Mean	0	PT-S1 SLC47As (MATEs) / 106 PTC (Relative Values)	1	SC lipids density gm/cm3 : Male	0.9	FMO1 Absolute Abundance	0																							Sigmoidal Female AdultMax	1.04
		Abundance : User UGT1 UM CV (%)	0	PT-S1 Apical Influx (Kidney) / 106 PTC (Relative Values)	1	SC lipids density CV (%) : Male	0	FMO1 EM Mean	1																							Sigmoidal Female Age50	14.31
		Abundance : User UGT1 IM Mean	0	PT-S1 Basolateral Efflux (Kidney) / 106 PTC (Relative Values)	1	SC proteins density gm/cm3 : Male	1.37	FMO1 EM CV (%)	30																							Sigmoidal Female n	4.18
		Abundance : User UGT1 IM CV (%)	0	PT-S2 ABCB1 (MDR1/P-gp) / 106 PTC (Relative Values)	1	SC proteins density CV (%) : Male	0	FMO1 PM Mean	0																							Parameter:	Total Skin Thickness
		Absolute Abundance : User UGT1	0	PT-S2 ABCC4 (MRP4) / 106 PTC (Relative Values)	1	Intercellular lipid thickness of SC µm : Male	0.091	FMO1 PM CV (%)	0																							Sigmoidal Male FBirth	0.72
		Turnover rate : User UGT1 Mean	1e-06	PT-S2 SLC22A2 (OCT2) / 106 PTC (Relative Values)	1	Intercellular lipid thickness of SC CV (%) : Male	0	FMO1 UM Mean	0																							Sigmoidal Male AdultMax	1.01
		Turnover rate : User UGT1 CV (%)	30	PT-S2 SLC22A6 (OAT1) / 106 PTC (Relative Values)	1	Tortuosity : Male	User Defined	FMO1 UM CV (%)	0																							Sigmoidal Male Age50	16.5
		Use User Cytosolic Enzyme Option	Yes	PT-S2 SLC22A8 (OAT3) / 106 PTC (Relative Values)	1	Tortuosity of lipid diffusion pathway of SC : Male	12.7	FMO1 IM Mean	0																							Sigmoidal Male n	6.09
		User Cyt	1	PT-S2 SLC47As (MATEs) / 106 PTC (Relative Values)	1	Tortuosity of lipid diffusion pathway of SC CV (%) : Male	18	FMO1 IM CV (%)	0																							Sigmoidal Female FBirth	0.72
		Abundance : User Cyt1 EM Mean	1	PT-S2 Apical Influx (Kidney) / 106 PTC (Relative Values)	1	Hair follicle diameter µm : Male	88.8	FMO3 Absolute Abundance	0																							Sigmoidal Female AdultMax	1.01
		Abundance : User Cyt1 EM CV (%)	30	PT-S2 Basolateral Efflux (Kidney) / 106 PTC (Relative Values)	1	Hair follicle diameter CV (%) : Male	33	FMO3 EM Mean	1																							Sigmoidal Female Age50	16.5
		Abundance : User Cyt1 PM Mean	0	PT-S3 ABCB1 (MDR1/P-gp) / 106 PTC (Relative Values)	1	Hair follicle density N/cm2 : Male	32	FMO3 EM CV (%)	30																							Sigmoidal Female n	6.09
		Abundance : User Cyt1 PM CV (%)	0	PT-S3 ABCC4 (MRP4) / 106 PTC (Relative Values)	1	Hair follicle density CV (%) : Male	28	FMO3 PM Mean	0																							Parameter:	Local Subcutaneous Thickness
		Abundance : User Cyt1 UM Mean	0	PT-S3 SLC22A2 (OCT2) / 106 PTC (Relative Values)	1	Hair follicle depth µm : Male	256.7	FMO3 PM CV (%)	0																							Sigmoidal Male FBirth	0.67
		Abundance : User Cyt1 UM CV (%)	0	PT-S3 SLC22A6 (OAT1) / 106 PTC (Relative Values)	1	Hair follicle depth CV (%) : Male	0	FMO3 UM Mean	0																							Sigmoidal Male AdultMax	1.19
		Abundance : User Cyt1 IM Mean	0	PT-S3 SLC22A8 (OAT3) / 106 PTC (Relative Values)	1	Hair shaft diameter µm : Male	16.8	FMO3 UM CV (%)	0																							Sigmoidal Male Age50	16.21
		Abundance : User Cyt1 IM CV (%)	0	PT-S3 SLC47As (MATEs) / 106 PTC (Relative Values)	1	Hair shaft diameter CV (%) : Male	37	FMO3 IM Mean	0																							Sigmoidal Male n	1.6
		Use User Cytosolic Enzyme Option	Yes	PT-S3 Apical Influx (Kidney) / 106 PTC (Relative Values)	1	Sebum viscosity centipose : Male	40	FMO3 IM CV (%)	0																							Sigmoidal Female FBirth	0.37
		User Cyt	2	PT-S3 Basolateral Efflux (Kidney) / 106 PTC (Relative Values)	1	Sebum viscosity CV (%) : Male	0	FMO5 Absolute Abundance	0																							Sigmoidal Female AdultMax	1.38
		Abundance : User Cyt2 EM Mean	1	ABCB1 (P-gp/MDR1) ET Mean	1	Corneocyte pH [top] : Male	6.8	FMO5 EM Mean	1																							Sigmoidal Female Age50	17.3
		Abundance : User Cyt2 EM CV (%)	30	ABCB1 (P-gp/MDR1) ET CV (%)	60	Corneocyte pH [top] CV (%) : Male	6.8	FMO5 EM CV (%)	30																							Sigmoidal Female n	1.83
		Abundance : User Cyt2 PM Mean	0	ABCB1 (P-gp/MDR1) PT Mean	0	Corneocyte thickness [top] µm : Male	0.71	FMO5 PM Mean	0																							Parameter:	Local Muscle Thickness
		Abundance : User Cyt2 PM CV (%)	0	ABCB1 (P-gp/MDR1) PT CV (%)	0	Corneocyte thickness [top] CV (%) : Male	11	FMO5 PM CV (%)	0																							Linear C0	11.8
		Abundance : User Cyt2 UM Mean	0	ABCB1 (P-gp/MDR1) IT Mean	0	Corneocyte width [top] µm : Male	33.2	FMO5 UM Mean	0																							Linear C1	0.18
		Abundance : User Cyt2 UM CV (%)	0	ABCB1 (P-gp/MDR1) IT CV (%)	0	Corneocyte width [top] CV (%) : Male	10.4	FMO5 UM CV (%)	0
		Abundance : User Cyt2 IM Mean	0	ABCB1 (P-gp/MDR1) UT Mean	0	Corneocyte length [top] µm : Male	40.4	FMO5 IM Mean	0																							Site:	UpperArm
		Abundance : User Cyt2 IM CV (%)	0	ABCB1 (P-gp/MDR1) UT CV (%)	0	Corneocyte length [top] CV (%) : Male	6.8	FMO5 IM CV (%)	0																							Parameter:	Skin Surface pH
		Use User Cytosolic Enzyme Option	Yes	ABCC4 (MRP4) ET Mean	1	Hydration level (% water volume) [top] : Male	33.6	FMOUser Absolute Abundance	0																							Exponential C0	1.01
		User Cyt	3	ABCC4 (MRP4) ET CV (%)	60	Hydration level (% water volume) [top] CV (%) : Male	11	FMOUser EM Mean	1																							Exponential C1	0.35
		Abundance : User Cyt3 EM Mean	1	ABCC4 (MRP4) PT Mean	0	SC lipid viscosity [top] centipose : Male	75	FMOUser EM CV (%)	30																							Exponential C2	27.61
		Abundance : User Cyt3 EM CV (%)	30	ABCC4 (MRP4) PT CV (%)	0	SC lipid viscosity [top] CV (%) : Male	0	FMOUser PM Mean	0																							Parameter:	SC Thickness
		Abundance : User Cyt3 PM Mean	0	ABCC4 (MRP4) IT Mean	0	Corneocyte pH [upper mid] : Male	6.8	FMOUser PM CV (%)	0																							Sigmoidal Male FBirth	0.5
		Abundance : User Cyt3 PM CV (%)	0	ABCC4 (MRP4) IT CV (%)	0	Corneocyte pH [upper mid] CV (%) : Male	6.8	FMOUser UM Mean	0																							Sigmoidal Male AdultMax	1.01
		Abundance : User Cyt3 UM Mean	0	ABCC4 (MRP4) UT Mean	0	Corneocyte thickness [upper mid] µm : Male	0.81	FMOUser UM CV (%)	0																							Sigmoidal Male Age50	2.72
		Abundance : User Cyt3 UM CV (%)	0	ABCC4 (MRP4) UT CV (%)	0	Corneocyte thickness [upper mid] CV (%) : Male	11	FMOUser IM Mean	0																							Sigmoidal Male n	3.43
		Abundance : User Cyt3 IM Mean	0	SLC22A2 (OCT2) ET Mean	1	Corneocyte width [upper mid] µm : Male	33.2	FMOUser IM CV (%)	0																							Sigmoidal Female FBirth	0.5
		Abundance : User Cyt3 IM CV (%)	0	SLC22A2 (OCT2) ET CV (%)	60	Corneocyte width [upper mid] CV (%) : Male	10.4	Achlorhydric Coefficient	0																							Sigmoidal Female AdultMax	1.01
		Use User Cytosolic Enzyme Option	Yes	SLC22A2 (OCT2) PT Mean	0	Corneocyte length [upper mid] µm : Male	40.4	Achlorhydric Age Power	0																							Sigmoidal Female Age50	2.72
		User Cyt	4	SLC22A2 (OCT2) PT CV (%)	0	Corneocyte length [upper mid] CV (%) : Male	6.8	Achlorhydric Maximum (%)	0																							Sigmoidal Female n	3.43
		Abundance : User Cyt4 EM Mean	1	SLC22A2 (OCT2) IT Mean	0	Hydration level (% water volume) [upper mid] : Male	44.858	Intestine pH Model	Static																							Parameter:	Viable Epidermis Thickness
		Abundance : User Cyt4 EM CV (%)	30	SLC22A2 (OCT2) IT CV (%)	0	Hydration level (% water volume) [upper mid] CV (%) : Male	7	Stomach pH Fasted	1.5																							Sigmoidal Male FBirth	0.64
		Abundance : User Cyt4 PM Mean	0	SLC22A2 (OCT2) UT Mean	0	SC lipid viscosity [upper mid] centipose : Male	75	Stomach CV pH Fasted (%)	38																							Sigmoidal Male AdultMax	1.04
		Abundance : User Cyt4 PM CV (%)	0	SLC22A2 (OCT2) UT CV (%)	0	SC lipid viscosity [upper mid] CV (%) : Male	0	Stomach pH High Fat Fed initial	4.39																							Sigmoidal Male Age50	14.31
		Abundance : User Cyt4 UM Mean	0	SLC22A6 (OAT1) ET Mean	1	Corneocyte pH [lower mid] : Male	6.8	Stomach CV pH High Fat Fed initial (%)	24																							Sigmoidal Male n	4.18
		Abundance : User Cyt4 UM CV (%)	0	SLC22A6 (OAT1) ET CV (%)	60	Corneocyte pH [lower mid] CV (%) : Male	6.8	k	0.467																							Sigmoidal Female FBirth	0.64
		Abundance : User Cyt4 IM Mean	0	SLC22A6 (OAT1) PT Mean	0	Corneocyte thickness [lower mid] µm : Male	0.93	k CV (%)	97.8																							Sigmoidal Female AdultMax	1.04
		Abundance : User Cyt4 IM CV (%)	0	SLC22A6 (OAT1) PT CV (%)	0	Corneocyte thickness [lower mid] CV (%) : Male	11	Stomach pH Fed initial	5																							Sigmoidal Female Age50	14.31
		Abundance : CES1 EM Mean	1	SLC22A6 (OAT1) IT Mean	0	Corneocyte width [lower mid] µm : Male	33.2	Stomach CV pH Fed initial (%)	25																							Sigmoidal Female n	4.18
		Abundance : CES1 EM CV (%)	46	SLC22A6 (OAT1) IT CV (%)	0	Corneocyte width [lower mid] CV (%) : Male	10.4	Age < 65 Fed Tff (h)	1.8																							Parameter:	Total Skin Thickness
		Abundance : CES1 PM Mean	0.11	SLC22A6 (OAT1) UT Mean	0	Corneocyte length [lower mid] µm : Male	40.4	Age < 65 Fed Tff CV (%)	65																							Sigmoidal Male FBirth	0.72
		Abundance : CES1 PM CV (%)	30	SLC22A6 (OAT1) UT CV (%)	0	Corneocyte length [lower mid] CV (%) : Male	6.8	Age ≥ 65 Fed Tff (h)	3																							Sigmoidal Male AdultMax	1.01
		Abundance : CES1 UM Mean	0	SLC22A8 (OAT3) ET Mean	1	Hydration level (% water volume) [lower mid] : Male	56.0703	Age ≥ 65 Fed Tff CV (%)	80																							Sigmoidal Male Age50	16.5
		Abundance : CES1 UM CV (%)	0	SLC22A8 (OAT3) ET CV (%)	60	Hydration level (% water volume) [lower mid] CV (%) : Male	5	Stomach pH Low Fat Fed initial	5																							Sigmoidal Male n	6.09
		Abundance : CES1 IM Mean	0	SLC22A8 (OAT3) PT Mean	0	SC lipid viscosity [lower mid] centipose : Male	75	Stomach CV pH Low Fat Fed initial (%)	25																							Sigmoidal Female FBirth	0.72
		Abundance : CES1 IM CV (%)	0	SLC22A8 (OAT3) PT CV (%)	0	SC lipid viscosity [lower mid] CV (%) : Male	0	Age < 65 Low Fat Fed Tff (h)	1.8																							Sigmoidal Female AdultMax	1.01
		Abundance : CES2 EM Mean	1	SLC22A8 (OAT3) IT Mean	0	Corneocyte pH [bottom] : Male	6.8	Age < 65 Low Fat Fed Tff CV (%)	0																							Sigmoidal Female Age50	16.5
		Abundance : CES2 EM CV (%)	35	SLC22A8 (OAT3) IT CV (%)	0	Corneocyte pH [bottom] CV (%) : Male	6.8	Age ≥ 65 Low Fat Fed Tff (h)	3																							Sigmoidal Female n	6.09
		Abundance : CES2 PM Mean	0	SLC22A8 (OAT3) UT Mean	0	Corneocyte thickness [bottom] µm : Male	1.04	Age ≥ 65 Low Fat Fed Tff CV (%)	0																							Parameter:	Local Subcutaneous Thickness
		Abundance : CES2 PM CV (%)	0	SLC22A8 (OAT3) UT CV (%)	0	Corneocyte thickness [bottom] CV (%) : Male	11	Stomach Bicarbonate Buffer Concentration Fasted (mM)	7.3																							Sigmoidal Male FBirth	0.67
		Abundance : CES2 UM Mean	0	SLC47As (MATEs) ET Mean	1	Corneocyte width [bottom] µm : Male	33.2	Stomach Bicarbonate Buffer Concentration CV Fasted (%)	30																							Sigmoidal Male AdultMax	1.19
		Abundance : CES2 UM CV (%)	0	SLC47As (MATEs) ET CV (%)	60	Corneocyte width [bottom] CV (%) : Male	10.4	Stomach Bicarbonate Buffer Concentration Fed (mM)	42.46																							Sigmoidal Male Age50	16.21
		Abundance : CES2 IM Mean	0	SLC47As (MATEs) PT Mean	0	Corneocyte length [bottom] µm : Male	40.4	Stomach Bicarbonate Buffer Concentration CV Fed (%)	30																							Sigmoidal Male n	1.6
		Abundance : CES2 IM CV (%)	0	SLC47As (MATEs) PT CV (%)	0	Corneocyte length [bottom] CV (%) : Male	6.8	Stomach Luminal Fluid Velocity Fasted (m/s)	0.032																							Sigmoidal Female FBirth	0.37
		Use User ES Option	Yes	SLC47As (MATEs) IT Mean	0	Hydration level (% water volume) [bottom] : Male	67.3	Stomach Luminal Fluid Velocity CV Fasted (%)	30																							Sigmoidal Female AdultMax	1.38
		Abundance : User ES EM Mean	1	SLC47As (MATEs) IT CV (%)	0	Hydration level (% water volume) [bottom] CV (%) : Male	4	Stomach Luminal Fluid Velocity Fed (m/s)	0.032																							Sigmoidal Female Age50	17.3
		Abundance : User ES EM CV (%)	30	SLC47As (MATEs) UT Mean	0	SC lipid viscosity [bottom] centipose : Male	75	Stomach Luminal Fluid Velocity CV Fed (%)	30																							Sigmoidal Female n	1.83
		Abundance : User ES PM Mean	0	SLC47As (MATEs) UT CV (%)	0	SC lipid viscosity [bottom] CV (%) : Male	0	Stomach Endogenous Ion Hydrochloric Mean (mM)	102																							Parameter:	Local Muscle Thickness
		Abundance : User ES PM CV (%)	0	Apical Influx (Kidney) ET Mean	1	Viable Epidermis thickness µm : Male	51.8	Stomach Endogenous Ion Hydrochloric CV (%)	27.5																							Linear C0	7.7
		Abundance : User ES UM Mean	0	Apical Influx (Kidney) ET CV (%)	60	Viable Epidermis thickness CV (%) : Male	15	Stomach Endogenous Ion Hydrochloric Min (mM)	48																							Linear C1	0.28
		Abundance : User ES UM CV (%)	0	Apical Influx (Kidney) PT Mean	0	Dermis thickness µm : Male	1540	Stomach Endogenous Ion Hydrochloric Max (mM)	173
		Abundance : User ES IM Mean	0	Apical Influx (Kidney) PT CV (%)	0	Dermis thickness CV (%) : Male	29	Stomach Endogenous Ion Sodium Mean (mM)	68																							Site:	FaceCheek
		Abundance : User ES IM CV (%)	0	Apical Influx (Kidney) IT Mean	0	Subcutis thickness mm : Male	8.41	Stomach Endogenous Ion Sodium CV (%)	42.6																							Parameter:	Skin Surface pH
		Abundance : EM Mean	0	Apical Influx (Kidney) IT CV (%)	0	Subcutis thickness CV (%) : Male	39.6	Stomach Endogenous Ion Sodium Min (mM)	19																							Exponential C0	1.01
		Abundance : EM CV (%)	0	Apical Influx (Kidney) UT Mean	0	Muscle thickness mm : Male	28.92	Stomach Endogenous Ion Sodium Max (mM)	122																							Exponential C1	0.2
		Abundance : PM Mean	0	Apical Influx (Kidney) UT CV (%)	0	Muscle thickness CV (%) : Male	15.09	Stomach Endogenous Ion Potassium Mean (mM)	13.4																							Exponential C2	22.13
		Abundance : PM CV (%)	0	Basolateral Efflux (Kidney) ET Mean	1	Dermis regional blood flow scalar : Male	1.2869	Stomach Endogenous Ion Potassium CV (%)	22.4																							Parameter:	SC Thickness
		Abundance : UM Mean	0	Basolateral Efflux (Kidney) ET CV (%)	60	Dermis regional blood flow scalar CV (%) : Male	0	Stomach Endogenous Ion Potassium Min (mM)	8.4																							Sigmoidal Male FBirth	0.5
		Abundance : UM CV (%)	0	Basolateral Efflux (Kidney) PT Mean	0	Subcutis regional blood flow scalar : Male	1	Stomach Endogenous Ion Potassium Max (mM)	19.3																							Sigmoidal Male AdultMax	1.01
		Abundance : IM Mean	0	Basolateral Efflux (Kidney) PT CV (%)	0	Subcutis regional blood flow scalar CV (%) : Male	0	Stomach Endogenous Ion Calcium Mean (mM)	0.6																							Sigmoidal Male Age50	2.72
		Abundance : IM CV (%)	0	Basolateral Efflux (Kidney) IT Mean	0	Muscle regional blood flow scalar : Male	1	Stomach Endogenous Ion Calcium CV (%)	33.3																							Sigmoidal Male n	3.43
		Abundance : EM Mean	0	Basolateral Efflux (Kidney) IT CV (%)	0	Muscle regional blood flow scalar CV (%) : Male	0	Stomach Endogenous Ion Calcium Min (mM)	0.3																							Sigmoidal Female FBirth	0.5
		Abundance : EM CV (%)	0	Basolateral Efflux (Kidney) UT Mean	0			Stomach Endogenous Ion Calcium Max (mM)	1.2																							Sigmoidal Female AdultMax	1.01
		Abundance : PM Mean	0	Basolateral Efflux (Kidney) UT CV (%)	0	MPMLA - Face (cheek)		Stomach Endogenous Ion Generic Cation Mean (mM)	1																							Sigmoidal Female Age50	2.72
		Abundance : PM CV (%)	0			Skin surface pH : Male	4.7	Stomach Endogenous Ion Generic Cation CV (%)	0																							Sigmoidal Female n	3.43
		Abundance : UM Mean	0			Skin surface pH CV (%) : Male	7.2	Stomach Endogenous Ion Generic Cation Min (mM)	0.01																							Parameter:	Viable Epidermis Thickness
		Abundance : UM CV (%)	0			Skin temperature °C : Male	32	Stomach Endogenous Ion Generic Cation Max (mM)	1000																							Sigmoidal Male FBirth	0.64
		Abundance : IM Mean	0			Skin temperature CV (%) : Male	0	Stomach Endogenous Ion Generic Anion Mean (mM)	1																							Sigmoidal Male AdultMax	1.04
		Abundance : IM CV (%)	0			Shape of corneocyte : Male	Cuboid (brick)	Stomach Endogenous Ion Generic Anion CV (%)	0																							Sigmoidal Male Age50	14.31
		Absolute Abundance : FMO1	0			Shape of corneocyte : Female	Cuboid (brick)	Stomach Endogenous Ion Generic Anion Min (mM)	0.01																							Sigmoidal Male n	4.18
		Abundance : FMO1 EM Mean	1			Number of SC layers : Male	13	Stomach Endogenous Ion Generic Anion Max (mM)	1000																							Sigmoidal Female FBirth	0.64
		Abundance : FMO1 EM CV (%)	30			Number of SC layers CV (%) : Male	23	Stomach Fluid Viscosity Fasted (cP)	3																							Sigmoidal Female AdultMax	1.04
		Abundance : FMO1 PM Mean	0			Water density gm/cm3 : Male	1	Stomach Fluid Viscosity CV Fasted (%)	71																							Sigmoidal Female Age50	14.31
		Abundance : FMO1 PM CV (%)	0			Water density CV (%) : Male	0	Stomach Fluid Viscosity Fed (cP)	232																							Sigmoidal Female n	4.18
		Abundance : FMO1 UM Mean	0			SC lipids density gm/cm3 : Male	0.9	Stomach Fluid Viscosity CV Fed (%)	32																							Parameter:	Total Skin Thickness
		Abundance : FMO1 UM CV (%)	0			SC lipids density CV (%) : Male	0	Stomach CMC fasted (mM)	1																							Sigmoidal Male FBirth	0.72
		Abundance : FMO1 IM Mean	0			SC proteins density gm/cm3 : Male	1.37	Stomach CMC fed (mM)	1																							Sigmoidal Male AdultMax	1.01
		Abundance : FMO1 IM CV (%)	0			SC proteins density CV (%) : Male	0	Stomach Bile fasted (mM)	0.34																							Sigmoidal Male Age50	16.5
		Absolute Abundance : FMO3	30			Intercellular lipid thickness of SC µm : Male	0.091	Stomach Bile fasted CV (%)	134																							Sigmoidal Male n	6.09
		Abundance : FMO3 EM Mean	1			Intercellular lipid thickness of SC CV (%) : Male	0	Stomach Bile fed (mM)	0.34																							Sigmoidal Female FBirth	0.72
		Abundance : FMO3 EM CV (%)	50			Tortuosity : Male	User Defined	Stomach Bile fed CV (%)	216.7																							Sigmoidal Female AdultMax	1.01
		Abundance : FMO3 PM Mean	0			Tortuosity of lipid diffusion pathway of SC : Male	12.7	Duodenum Blood Flow (Qvilli %)	8.8																							Sigmoidal Female Age50	16.5
		Abundance : FMO3 PM CV (%)	0			Tortuosity of lipid diffusion pathway of SC CV (%) : Male	18	Duodenum Transit Time (% Total)	4.6																							Sigmoidal Female n	6.09
		Abundance : FMO3 UM Mean	0			Hair follicle diameter µm : Male	65.4	Duodenum CYP3A (% Total)	13.76																							Parameter:	Local Subcutaneous Thickness
		Abundance : FMO3 UM CV (%)	0			Hair follicle diameter CV (%) : Male	83	Duodenum S9PPI (% Total)	14.88																							Sigmoidal Male FBirth	0.67
		Abundance : FMO3 IM Mean	0			Hair follicle density N/cm2 : Male	292	Duodenum MPPI/CYP (% Total)	13.76																							Sigmoidal Male AdultMax	1.19
		Abundance : FMO3 IM CV (%)	0			Hair follicle density CV (%) : Male	16	Duodenum CPPI (% Total)	14.88																							Sigmoidal Male Age50	16.21
		Absolute Abundance : FMO5	25			Hair follicle depth µm : Male	204.8	Duodenum pH High Fat Fed	5.4																							Sigmoidal Male n	1.6
		Abundance : FMO5 EM Mean	1			Hair follicle depth CV (%) : Male	0	Duodenum CV pH High Fat Fed (%)	11																							Sigmoidal Female FBirth	0.37
		Abundance : FMO5 EM CV (%)	55			Hair shaft diameter µm : Male	15.9	Duodenum pH Fed	5.4																							Sigmoidal Female AdultMax	1.38
		Abundance : FMO5 PM Mean	0			Hair shaft diameter CV (%) : Male	57	Duodenum CV pH Fed (%)	11																							Sigmoidal Female Age50	17.3
		Abundance : FMO5 PM CV (%)	0			Sebum viscosity centipose : Male	40	Duodenum pH Low Fat Fed	5.4																							Sigmoidal Female n	1.83
		Abundance : FMO5 UM Mean	0			Sebum viscosity CV (%) : Male	0	Duodenum CV pH Low Fat Fed (%)	11																							Parameter:	Local Muscle Thickness
		Abundance : FMO5 UM CV (%)	0			Corneocyte pH [top] : Male	6.8	Duodenum pH Fasted	6.4																							Linear C0	3.85
		Abundance : FMO5 IM Mean	0			Corneocyte pH [top] CV (%) : Male	6.8	Duodenum CV pH Fasted (%)	16																							Linear C1	0.14
		Abundance : FMO5 IM CV (%)	0			Corneocyte thickness [top] µm : Male	0.47	Duodenum Bicarbonate Buffer Concentration Fasted (mM)	6.53
		Absolute Abundance : FMOUser	0			Corneocyte thickness [top] CV (%) : Male	4	Duodenum Bicarbonate Buffer Concentration CV Fasted (%)	30																							Site:	LegLower
		Abundance : FMOUser EM Mean	1			Corneocyte width [top] µm : Male	27.7	Duodenum Bicarbonate Buffer Concentration Fed (mM)	34.19																							Parameter:	Skin Surface pH
		Abundance : FMOUser EM CV (%)	30			Corneocyte width [top] CV (%) : Male	9.2	Duodenum Bicarbonate Buffer Concentration CV Fed (%)	30																							Exponential C0	1.01
		Abundance : FMOUser PM Mean	0			Corneocyte length [top] µm : Male	34.2	Duodenum Luminal Fluid Velocity Fasted (m/s)	0.005																							Exponential C1	0.35
		Abundance : FMOUser PM CV (%)	0			Corneocyte length [top] CV (%) : Male	4.1	Duodenum Luminal Fluid Velocity CV Fasted (%)	30																							Exponential C2	27.61
		Abundance : FMOUser UM Mean	0			Hydration level (% water volume) [top] : Male	35.5	Duodenum Luminal Fluid Velocity Fed (m/s)	0.005																							Parameter:	SC Thickness
		Abundance : FMOUser UM CV (%)	0			Hydration level (% water volume) [top] CV (%) : Male	17	Duodenum Luminal Fluid Velocity CV Fed (%)	30																							Sigmoidal Male FBirth	0.5
		Abundance : FMOUser IM Mean	0			SC lipid viscosity [top] centipose : Male	75	Duodenum Endogenous Ion Hydrochloric Mean (mM)	102.4																							Sigmoidal Male AdultMax	1.01
		Abundance : FMOUser IM CV (%)	0			SC lipid viscosity [top] CV (%) : Male	0	Duodenum Endogenous Ion Hydrochloric CV (%)	15.1																							Sigmoidal Male Age50	2.72
		CV for non P450 Clearance	30			Corneocyte pH [upper mid] : Male	6.8	Duodenum Endogenous Ion Hydrochloric Min (mM)	64.6																							Sigmoidal Male n	3.43
		Absolute Abundance : ABCB1 (P-gp/MDR1) (pmol/10^6 hepatocytes)	0.246			Corneocyte pH [upper mid] CV (%) : Male	6.8	Duodenum Endogenous Ion Hydrochloric Max (mM)	158.8																							Sigmoidal Female FBirth	0.5
		Abundance : ABCB1 (P-gp/MDR1) ET Mean	1			Corneocyte thickness [upper mid] µm : Male	0.53	Duodenum Endogenous Ion Sodium Mean (mM)	118.4																							Sigmoidal Female AdultMax	1.01
		Abundance : ABCB1 (P-gp/MDR1) ET CV (%)	59			Corneocyte thickness [upper mid] CV (%) : Male	4	Duodenum Endogenous Ion Sodium CV (%)	9.2																							Sigmoidal Female Age50	2.72
		Abundance : ABCB1 (P-gp/MDR1) PT Mean	0			Corneocyte width [upper mid] µm : Male	27.7	Duodenum Endogenous Ion Sodium Min (mM)	89.6																							Sigmoidal Female n	3.43
		Abundance : ABCB1 (P-gp/MDR1) PT CV (%)	0			Corneocyte width [upper mid] CV (%) : Male	9.2	Duodenum Endogenous Ion Sodium Max (mM)	155.1																							Parameter:	Viable Epidermis Thickness
		Abundance : ABCB1 (P-gp/MDR1) IT Mean	0			Corneocyte length [upper mid] µm : Male	34.2	Duodenum Endogenous Ion Potassium Mean (mM)	11.2																							Sigmoidal Male FBirth	0.64
		Abundance : ABCB1 (P-gp/MDR1) IT CV (%)	0			Corneocyte length [upper mid] CV (%) : Male	4.1	Duodenum Endogenous Ion Potassium CV (%)	38.9																							Sigmoidal Male AdultMax	1.04
		Abundance : ABCB1 (P-gp/MDR1) UT Mean	0			Hydration level (% water volume) [upper mid] : Male	46.1	Duodenum Endogenous Ion Potassium Min (mM)	3.4																							Sigmoidal Male Age50	14.31
		Abundance : ABCB1 (P-gp/MDR1) UT CV (%)	0			Hydration level (% water volume) [upper mid] CV (%) : Male	11	Duodenum Endogenous Ion Potassium Max (mM)	32.1																							Sigmoidal Male n	4.18
		Absolute Abundance : ABCB11 (BSEP) (pmol/10^6 hepatocytes)	1			SC lipid viscosity [upper mid] centipose : Male	75	Duodenum Endogenous Ion Calcium Mean (mM)	0.5																							Sigmoidal Female FBirth	0.64
		Abundance : ABCB11 (BSEP) ET Mean	1			SC lipid viscosity [upper mid] CV (%) : Male	0	Duodenum Endogenous Ion Calcium CV (%)	60																							Sigmoidal Female AdultMax	1.04
		Abundance : ABCB11 (BSEP) ET CV (%)	131			Corneocyte pH [lower mid] : Male	6.8	Duodenum Endogenous Ion Calcium Min (mM)	0.1																							Sigmoidal Female Age50	14.31
		Abundance : ABCB11 (BSEP) PT Mean	0			Corneocyte pH [lower mid] CV (%) : Male	6.8	Duodenum Endogenous Ion Calcium Max (mM)	1.3																							Sigmoidal Female n	4.18
		Abundance : ABCB11 (BSEP) PT CV (%)	0			Corneocyte thickness [lower mid] µm : Male	0.6	Duodenum Endogenous Ion Generic Cation Mean (mM)	1																							Parameter:	Total Skin Thickness
		Abundance : ABCB11 (BSEP) IT Mean	0			Corneocyte thickness [lower mid] CV (%) : Male	4	Duodenum Endogenous Ion Generic Cation CV (%)	0																							Sigmoidal Male FBirth	0.72
		Abundance : ABCB11 (BSEP) IT CV (%)	0			Corneocyte width [lower mid] µm : Male	27.7	Duodenum Endogenous Ion Generic Cation Min (mM)	0.01																							Sigmoidal Male AdultMax	1.01
		Abundance : ABCB11 (BSEP) UT Mean	0			Corneocyte width [lower mid] CV (%) : Male	9.2	Duodenum Endogenous Ion Generic Cation Max (mM)	1000																							Sigmoidal Male Age50	16.5
		Abundance : ABCB11 (BSEP) UT CV (%)	0			Corneocyte length [lower mid] µm : Male	34.2	Duodenum Endogenous Ion Generic Anion Mean (mM)	1																							Sigmoidal Male n	6.09
		Absolute Abundance : ABCC2 (MRP2) (pmol/10^6 hepatocytes)	0.59			Corneocyte length [lower mid] CV (%) : Male	4.1	Duodenum Endogenous Ion Generic Anion CV (%)	0																							Sigmoidal Female FBirth	0.72
		Abundance : ABCC2 (MRP2) ET Mean	1			Hydration level (% water volume) [lower mid] : Male	56.75	Duodenum Endogenous Ion Generic Anion Min (mM)	0.01																							Sigmoidal Female AdultMax	1.01
		Abundance : ABCC2 (MRP2) ET CV (%)	88			Hydration level (% water volume) [lower mid] CV (%) : Male	7	Duodenum Endogenous Ion Generic Anion Max (mM)	1000																							Sigmoidal Female Age50	16.5
		Abundance : ABCC2 (MRP2) PT Mean	0			SC lipid viscosity [lower mid] centipose : Male	75	Duodenum Fluid Viscosity Fasted (cP)	3																							Sigmoidal Female n	6.09
		Abundance : ABCC2 (MRP2) PT CV (%)	0			SC lipid viscosity [lower mid] CV (%) : Male	0	Duodenum Fluid Viscosity CV Fasted (%)	71																							Parameter:	Local Subcutaneous Thickness
		Abundance : ABCC2 (MRP2) IT Mean	0			Corneocyte pH [bottom] : Male	6.8	Duodenum Fluid Viscosity Fed (cP)	65																							Sigmoidal Male FBirth	0.67
		Abundance : ABCC2 (MRP2) IT CV (%)	0			Corneocyte pH [bottom] CV (%) : Male	6.8	Duodenum Fluid Viscosity CV Fed (%)	27																							Sigmoidal Male AdultMax	1.19
		Abundance : ABCC2 (MRP2) UT Mean	0			Corneocyte thickness [bottom] µm : Male	0.68	Duodenum CMC fasted (mM)	1																							Sigmoidal Male Age50	16.21
		Abundance : ABCC2 (MRP2) UT CV (%)	0			Corneocyte thickness [bottom] CV (%) : Male	4	Duodenum CMC fed (mM)	1																							Sigmoidal Male n	1.6
		Absolute Abundance : ABCC3 (MRP3) (pmol/10^6 hepatocytes)	0.239			Corneocyte width [bottom] µm : Male	27.7	Duodenum Bile fasted (mM)	3.31																							Sigmoidal Female FBirth	0.37
		Abundance : ABCC3 (MRP3) ET Mean	1			Corneocyte width [bottom] CV (%) : Male	9.2	Duodenum Bile fasted CV (%)	97																							Sigmoidal Female AdultMax	1.38
		Abundance : ABCC3 (MRP3) ET CV (%)	65			Corneocyte length [bottom] µm : Male	34.2	Duodenum Bile fed (mM)	8.74																							Sigmoidal Female Age50	17.3
		Abundance : ABCC3 (MRP3) PT Mean	0			Corneocyte length [bottom] CV (%) : Male	4.1	Duodenum Bile fed CV (%)	79																							Sigmoidal Female n	1.83
		Abundance : ABCC3 (MRP3) PT CV (%)	0			Hydration level (% water volume) [bottom] : Male	67.4	Duodenum Channel Depth Mean (µm)	522.78																							Parameter:	Local Muscle Thickness
		Abundance : ABCC3 (MRP3) IT Mean	0			Hydration level (% water volume) [bottom] CV (%) : Male	4	Duodenum Channel Depth CV (%)	32.72																							Linear C0	8.1
		Abundance : ABCC3 (MRP3) IT CV (%)	0			SC lipid viscosity [bottom] centipose : Male	75	Duodenum Channel Width Mean (µm)	28.03																							Linear C1	0.19
		Abundance : ABCC3 (MRP3) UT Mean	0			SC lipid viscosity [bottom] CV (%) : Male	0	Duodenum Channel Width CV (%)	28.69
		Abundance : ABCC3 (MRP3) UT CV (%)	0			Viable Epidermis thickness µm : Male	46.8667	Duodenum Mean Thickness Mean (µm)	128.35																							Site:	LegUpper
		Absolute Abundance : ABCC4 (MRP4) (pmol/10^6 hepatocytes)	0			Viable Epidermis thickness CV (%) : Male	24	Duodenum Mean Thickness CV (%)	8.1																							Parameter:	Skin Surface pH
		Abundance : ABCC4 (MRP4) ET Mean	1			Dermis thickness µm : Male	1580	Duodenum Fold Expansion Mean	1																							Exponential C0	1.01
		Abundance : ABCC4 (MRP4) ET CV (%)	60			Dermis thickness CV (%) : Male	20	Duodenum Fold Expansion CV (%)	0																							Exponential C1	0.35
		Abundance : ABCC4 (MRP4) PT Mean	0			Subcutis thickness mm : Male	1.91	Duodenum Pore Radius Mean	8.6																							Exponential C2	27.61
		Abundance : ABCC4 (MRP4) PT CV (%)	0			Subcutis thickness CV (%) : Male	55.7	Duodenum Pore Radius CV (%)	0																							Parameter:	SC Thickness
		Abundance : ABCC4 (MRP4) IT Mean	0			Muscle thickness mm : Male	13.2	Duodenum Unstirred Layer Thickness Mean (µm)	170																							Sigmoidal Male FBirth	0.5
		Abundance : ABCC4 (MRP4) IT CV (%)	0			Muscle thickness CV (%) : Male	18	Duodenum Unstirred Layer Thickness CV (%)	22.35																							Sigmoidal Male AdultMax	1.01
		Abundance : ABCC4 (MRP4) UT Mean	0			Dermis regional blood flow scalar : Male	2.12619	Duodenum Unstirred Layer pH	6.5																							Sigmoidal Male Age50	2.72
		Abundance : ABCC4 (MRP4) UT CV (%)	0			Dermis regional blood flow scalar CV (%) : Male	0	Duodenum Unstirred Layer CV (%)	0.5																							Sigmoidal Male n	3.43
		Absolute Abundance : ABCC6 (MRP6) (pmol/10^6 hepatocytes)	0.214			Subcutis regional blood flow scalar : Male	1	Duodenum ABCB1 (P-gp/MDR1) (Relative values)	0.51																							Sigmoidal Female FBirth	0.5
		Abundance : ABCC6 (MRP6) ET Mean	1			Subcutis regional blood flow scalar CV (%) : Male	0	Duodenum ABCC1 (MRP1) (Relative values)	0.45																							Sigmoidal Female AdultMax	1.01
		Abundance : ABCC6 (MRP6) ET CV (%)	46			Muscle regional blood flow scalar : Male	1	Duodenum ABCC2 (MRP2) (Relative values)	1.41																							Sigmoidal Female Age50	2.72
		Abundance : ABCC6 (MRP6) PT Mean	0			Muscle regional blood flow scalar CV (%) : Male	0	Duodenum ABCC3 (MRP3) (Relative values)	2.15																							Sigmoidal Female n	3.43
		Abundance : ABCC6 (MRP6) PT CV (%)	0					Duodenum ABCC4 (MRP4) (Relative values)	1.02																							Parameter:	Viable Epidermis Thickness
		Abundance : ABCC6 (MRP6) IT Mean	0			MPMLA - Lower Leg		Duodenum ABCG2 (BCRP) (Relative values)	0.68																							Sigmoidal Male FBirth	0.64
		Abundance : ABCC6 (MRP6) IT CV (%)	0			Skin surface pH : Male	5.5	Duodenum SLC2A2 (GLUT2) (Relative values)	1																							Sigmoidal Male AdultMax	1.04
		Abundance : ABCC6 (MRP6) UT Mean	0			Skin surface pH CV (%) : Male	11	Duodenum SLC10A2 (ASBT/IBAT) (Relative values)	16.49																							Sigmoidal Male Age50	14.31
		Abundance : ABCC6 (MRP6) UT CV (%)	0			Skin temperature °C : Male	32	Duodenum SLC15A1 (PEPT1) (Relative values)	0.94																							Sigmoidal Male n	4.18
		Absolute Abundance : ABCG2 (BCRP) (pmol/10^6 hepatocytes)	0.103			Skin temperature CV (%) : Male	0	Duodenum SLC16A1 (MCT1) (Relative values)	1.25																							Sigmoidal Female FBirth	0.64
		Abundance : ABCG2 (BCRP) ET Mean	1			Shape of corneocyte : Male	Cuboid (brick)	Duodenum SLCO2B1 (OATP2B1) (Relative values)	0.73																							Sigmoidal Female AdultMax	1.04
		Abundance : ABCG2 (BCRP) ET CV (%)	30			Shape of corneocyte : Female	Cuboid (brick)	Duodenum SLCO4C1 (OATP4C1) (Relative values)	1																							Sigmoidal Female Age50	14.31
		Abundance : ABCG2 (BCRP) PT Mean	0.37			Number of SC layers : Male	22	Duodenum SLC22A1 (OCT1) (Relative values)	1.03																							Sigmoidal Female n	4.18
		Abundance : ABCG2 (BCRP) PT CV (%)	30			Number of SC layers CV (%) : Male	6	Duodenum SLC22A3 (OCT3) (Relative values)	1.19																							Parameter:	Total Skin Thickness
		Abundance : ABCG2 (BCRP) IT Mean	0.67			Water density gm/cm3 : Male	1	Duodenum SLC22A4 (OCTN1) (Relative values)	0.46																							Sigmoidal Male FBirth	0.72
		Abundance : ABCG2 (BCRP) IT CV (%)	30			Water density CV (%) : Male	0	Duodenum SLC51A/B (OST-α/β) (Relative values)	0.56																							Sigmoidal Male AdultMax	1.01
		Abundance : ABCG2 (BCRP) UT Mean	0			SC lipids density gm/cm3 : Male	0.9	Duodenum Apical Influx (Intestine) (Relative values)	1																							Sigmoidal Male Age50	16.5
		Abundance : ABCG2 (BCRP) UT CV (%)	0			SC lipids density CV (%) : Male	0	Duodenum Apical Efflux (Intestine) (Relative values)	1																							Sigmoidal Male n	6.09
		Absolute Abundance : SLC10A1 (NTCP) (pmol/10^6 hepatocytes)	0.647			SC proteins density gm/cm3 : Male	1.37	Duodenum Basolateral Influx (Intestine) (Relative values)	1																							Sigmoidal Female FBirth	0.72
		Abundance : SLC10A1 (NTCP) ET Mean	1			SC proteins density CV (%) : Male	0	Duodenum Basolateral Efflux (Intestine) (Relative values)	1																							Sigmoidal Female AdultMax	1.01
		Abundance : SLC10A1 (NTCP) ET CV (%)	50			Intercellular lipid thickness of SC µm : Male	0.091	Jejunum I Blood Flow (Qvilli %)	24.2																							Sigmoidal Female Age50	16.5
		Abundance : SLC10A1 (NTCP) PT Mean	0			Intercellular lipid thickness of SC CV (%) : Male	0	Jejunum I Transit Time (% Total)	17.3																							Sigmoidal Female n	6.09
		Abundance : SLC10A1 (NTCP) PT CV (%)	0			Tortuosity : Male	User Defined	Jejunum I CYP3A (% Total)	27.24																							Parameter:	Local Subcutaneous Thickness
		Abundance : SLC10A1 (NTCP) IT Mean	0			Tortuosity of lipid diffusion pathway of SC : Male	12.7	Jejunum I S9PPI (% Total)	26.9																							Sigmoidal Male FBirth	0.67
		Abundance : SLC10A1 (NTCP) IT CV (%)	0			Tortuosity of lipid diffusion pathway of SC CV (%) : Male	18	Jejunum I MPPI/CYP (% Total)	27.24																							Sigmoidal Male AdultMax	1.19
		Abundance : SLC10A1 (NTCP) UT Mean	0			Hair follicle diameter µm : Male	168.4	Jejunum I CPPI (% Total)	26.9																							Sigmoidal Male Age50	16.21
		Abundance : SLC10A1 (NTCP) UT CV (%)	0			Hair follicle diameter CV (%) : Male	26	Jejunum I pH High Fat Fed	6.5																							Sigmoidal Male n	1.6
		Absolute Abundance : SLC16A1 (MCT1) (pmol/10^6 hepatocytes)	0.638			Hair follicle density N/cm2 : Male	14	Jejunum I CV pH High Fat Fed (%)	13																							Sigmoidal Female FBirth	0.37
		Abundance : SLC16A1 (MCT1) ET Mean	1			Hair follicle density CV (%) : Male	50	Jejunum I pH Fed	6.5																							Sigmoidal Female AdultMax	1.38
		Abundance : SLC16A1 (MCT1) ET CV (%)	60			Hair follicle depth µm : Male	613.5	Jejunum I CV pH Fed (%)	13																							Sigmoidal Female Age50	17.3
		Abundance : SLC16A1 (MCT1) PT Mean	0			Hair follicle depth CV (%) : Male	0	Jejunum I pH Low Fat Fed	6.5																							Sigmoidal Female n	1.83
		Abundance : SLC16A1 (MCT1) PT CV (%)	0			Hair shaft diameter µm : Male	42.1	Jejunum I CV pH Low Fat Fed (%)	13																							Parameter:	Local Muscle Thickness
		Abundance : SLC16A1 (MCT1) IT Mean	0			Hair shaft diameter CV (%) : Male	29	Jejunum I pH Fasted	6.5																							Linear C0	16.3
		Abundance : SLC16A1 (MCT1) IT CV (%)	0			Sebum viscosity centipose : Male	40	Jejunum I CV pH Fasted (%)	13																							Linear C1	0.42
		Abundance : SLC16A1 (MCT1) UT Mean	0			Sebum viscosity CV (%) : Male	0	Jejunum I Bicarbonate Buffer Concentration Fasted (mM)	9.94
		Abundance : SLC16A1 (MCT1) UT CV (%)	0			Corneocyte pH [top] : Male	6.8	Jejunum I Bicarbonate Buffer Concentration CV Fasted (%)	30																							Site:	Back
		Absolute Abundance : SLCO1B1 (OATP1B1) (pmol/10^6 hepatocytes)	3.1			Corneocyte pH [top] CV (%) : Male	6.8	Jejunum I Bicarbonate Buffer Concentration Fed (mM)	17.34																							Parameter:	Skin Surface pH
		Abundance : SLCO1B1 (OATP1B1) ET Mean	1			Corneocyte thickness [top] µm : Male	0.87	Jejunum I Bicarbonate Buffer Concentration CV Fed (%)	30																							Exponential C0	1.01
		Abundance : SLCO1B1 (OATP1B1) ET CV (%)	73			Corneocyte thickness [top] CV (%) : Male	9	Jejunum I Luminal Fluid Velocity Fasted (m/s)	0.0013																							Exponential C1	0.35
		Abundance : SLCO1B1 (OATP1B1) PT Mean	0.37			Corneocyte width [top] µm : Male	29.6	Jejunum I Luminal Fluid Velocity CV Fasted (%)	56																							Exponential C2	27.61
		Abundance : SLCO1B1 (OATP1B1) PT CV (%)	30			Corneocyte width [top] CV (%) : Male	5.9	Jejunum I Luminal Fluid Velocity Fed (m/s)	0.0013																							Parameter:	SC Thickness
		Abundance : SLCO1B1 (OATP1B1) IT Mean	0.68			Corneocyte length [top] µm : Male	36.4	Jejunum I Luminal Fluid Velocity CV Fed (%)	56																							Sigmoidal Male FBirth	0.5
		Abundance : SLCO1B1 (OATP1B1) IT CV (%)	52			Corneocyte length [top] CV (%) : Male	5.7	Jejunum I Endogenous Ion Hydrochloric Mean (mM)	126																							Sigmoidal Male AdultMax	1.01
		Abundance : SLCO1B1 (OATP1B1) UT Mean	1.39			Hydration level (% water volume) [top] : Male	33.9	Jejunum I Endogenous Ion Hydrochloric CV (%)	15.1																							Sigmoidal Male Age50	2.72
		Abundance : SLCO1B1 (OATP1B1) UT CV (%)	62			Hydration level (% water volume) [top] CV (%) : Male	9	Jejunum I Endogenous Ion Hydrochloric Min (mM)	92																							Sigmoidal Male n	3.43
		Absolute Abundance : SLCO1B3 (OATP1B3) (pmol/10^6 hepatocytes)	3.08			SC lipid viscosity [top] centipose : Male	75	Jejunum I Endogenous Ion Hydrochloric Max (mM)	181																							Sigmoidal Female FBirth	0.5
		Abundance : SLCO1B3 (OATP1B3) ET Mean	1			SC lipid viscosity [top] CV (%) : Male	0	Jejunum I Endogenous Ion Sodium Mean (mM)	142																							Sigmoidal Female AdultMax	1.01
		Abundance : SLCO1B3 (OATP1B3) ET CV (%)	89			Corneocyte pH [upper mid] : Male	6.8	Jejunum I Endogenous Ion Sodium CV (%)	9.2																							Sigmoidal Female Age50	2.72
		Abundance : SLCO1B3 (OATP1B3) PT Mean	0			Corneocyte pH [upper mid] CV (%) : Male	6.8	Jejunum I Endogenous Ion Sodium Min (mM)	111																							Sigmoidal Female n	3.43
		Abundance : SLCO1B3 (OATP1B3) PT CV (%)	0			Corneocyte thickness [upper mid] µm : Male	0.99	Jejunum I Endogenous Ion Sodium Max (mM)	165																							Parameter:	Viable Epidermis Thickness
		Abundance : SLCO1B3 (OATP1B3) IT Mean	0			Corneocyte thickness [upper mid] CV (%) : Male	9	Jejunum I Endogenous Ion Potassium Mean (mM)	5.4																							Sigmoidal Male FBirth	0.64
		Abundance : SLCO1B3 (OATP1B3) IT CV (%)	0			Corneocyte width [upper mid] µm : Male	29.6	Jejunum I Endogenous Ion Potassium CV (%)	38.9																							Sigmoidal Male AdultMax	1.04
		Abundance : SLCO1B3 (OATP1B3) UT Mean	0			Corneocyte width [upper mid] CV (%) : Male	5.9	Jejunum I Endogenous Ion Potassium Min (mM)	1.7																							Sigmoidal Male Age50	14.31
		Abundance : SLCO1B3 (OATP1B3) UT CV (%)	0			Corneocyte length [upper mid] µm : Male	36.4	Jejunum I Endogenous Ion Potassium Max (mM)	11.6																							Sigmoidal Male n	4.18
		Absolute Abundance : SLCO2B1 (OATP2B1) (pmol/10^6 hepatocytes)	1.18			Corneocyte length [upper mid] CV (%) : Male	5.7	Jejunum I Endogenous Ion Calcium Mean (mM)	0.5																							Sigmoidal Female FBirth	0.64
		Abundance : SLCO2B1 (OATP2B1) ET Mean	1			Hydration level (% water volume) [upper mid] : Male	44.6987	Jejunum I Endogenous Ion Calcium CV (%)	60																							Sigmoidal Female AdultMax	1.04
		Abundance : SLCO2B1 (OATP2B1) ET CV (%)	62			Hydration level (% water volume) [upper mid] CV (%) : Male	6	Jejunum I Endogenous Ion Calcium Min (mM)	0.1																							Sigmoidal Female Age50	14.31
		Abundance : SLCO2B1 (OATP2B1) PT Mean	0			SC lipid viscosity [upper mid] centipose : Male	75	Jejunum I Endogenous Ion Calcium Max (mM)	1.3																							Sigmoidal Female n	4.18
		Abundance : SLCO2B1 (OATP2B1) PT CV (%)	0			SC lipid viscosity [upper mid] CV (%) : Male	0	Jejunum I Endogenous Ion Generic Cation Mean (mM)	1																							Parameter:	Total Skin Thickness
		Abundance : SLCO2B1 (OATP2B1) IT Mean	0			Corneocyte pH [lower mid] : Male	6.8	Jejunum I Endogenous Ion Generic Cation CV (%)	0																							Sigmoidal Male FBirth	0.72
		Abundance : SLCO2B1 (OATP2B1) IT CV (%)	0			Corneocyte pH [lower mid] CV (%) : Male	6.8	Jejunum I Endogenous Ion Generic Cation Min (mM)	0.01																							Sigmoidal Male AdultMax	1.01
		Abundance : SLCO2B1 (OATP2B1) UT Mean	0			Corneocyte thickness [lower mid] µm : Male	1.13	Jejunum I Endogenous Ion Generic Cation Max (mM)	1000																							Sigmoidal Male Age50	16.5
		Abundance : SLCO2B1 (OATP2B1) UT CV (%)	0			Corneocyte thickness [lower mid] CV (%) : Male	9	Jejunum I Endogenous Ion Generic Anion Mean (mM)	1																							Sigmoidal Male n	6.09
		Absolute Abundance : SLC22A1 (OCT1) (pmol/10^6 hepatocytes)	1.27			Corneocyte width [lower mid] µm : Male	29.6	Jejunum I Endogenous Ion Generic Anion CV (%)	0																							Sigmoidal Female FBirth	0.72
		Abundance : SLC22A1 (OCT1) ET Mean	1			Corneocyte width [lower mid] CV (%) : Male	5.9	Jejunum I Endogenous Ion Generic Anion Min (mM)	0.01																							Sigmoidal Female AdultMax	1.01
		Abundance : SLC22A1 (OCT1) ET CV (%)	44			Corneocyte length [lower mid] µm : Male	36.4	Jejunum I Endogenous Ion Generic Anion Max (mM)	1000																							Sigmoidal Female Age50	16.5
		Abundance : SLC22A1 (OCT1) PT Mean	0.01			Corneocyte length [lower mid] CV (%) : Male	5.7	Jejunum I Fluid Viscosity Fasted (cP)	3																							Sigmoidal Female n	6.09
		Abundance : SLC22A1 (OCT1) PT CV (%)	44			Hydration level (% water volume) [lower mid] : Male	55.5388	Jejunum I Fluid Viscosity CV Fasted (%)	71																							Parameter:	Local Subcutaneous Thickness
		Abundance : SLC22A1 (OCT1) IT Mean	0.62			Hydration level (% water volume) [lower mid] CV (%) : Male	5	Jejunum I Fluid Viscosity Fed (cP)	33																							Sigmoidal Male FBirth	0.67
		Abundance : SLC22A1 (OCT1) IT CV (%)	44			SC lipid viscosity [lower mid] centipose : Male	75	Jejunum I Fluid Viscosity CV Fed (%)	36																							Sigmoidal Male AdultMax	1.19
		Abundance : SLC22A1 (OCT1) UT Mean	1.14			SC lipid viscosity [lower mid] CV (%) : Male	0	Jejunum I CMC fasted (mM)	1																							Sigmoidal Male Age50	16.21
		Abundance : SLC22A1 (OCT1) UT CV (%)	44			Corneocyte pH [bottom] : Male	6.8	Jejunum I CMC fed (mM)	1																							Sigmoidal Male n	1.6
		Absolute Abundance : SLC22A7 (OAT2) (pmol/10^6 hepatocytes)	1.25			Corneocyte pH [bottom] CV (%) : Male	6.8	Jejunum I Bile fasted (mM)	2.3																							Sigmoidal Female FBirth	0.37
		Abundance : SLC22A7 (OAT2) ET Mean	1			Corneocyte thickness [bottom] µm : Male	1.27	Jejunum I Bile fasted CV (%)	100																							Sigmoidal Female AdultMax	1.38
		Abundance : SLC22A7 (OAT2) ET CV (%)	75			Corneocyte thickness [bottom] CV (%) : Male	9	Jejunum I Bile fed (mM)	10.03																							Sigmoidal Female Age50	17.3
		Abundance : SLC22A7 (OAT2) PT Mean	0			Corneocyte width [bottom] µm : Male	29.6	Jejunum I Bile fed CV (%)	73																							Sigmoidal Female n	1.83
		Abundance : SLC22A7 (OAT2) PT CV (%)	0			Corneocyte width [bottom] CV (%) : Male	5.9	Jejunum I Channel Depth Mean (µm)	448.81																							Parameter:	Local Muscle Thickness
		Abundance : SLC22A7 (OAT2) IT Mean	0			Corneocyte length [bottom] µm : Male	36.4	Jejunum I Channel Depth CV (%)	21.82																							Linear C0	8.1
		Abundance : SLC22A7 (OAT2) IT CV (%)	0			Corneocyte length [bottom] CV (%) : Male	5.7	Jejunum I Channel Width Mean (µm)	22.44																							Linear C1	0.19
		Abundance : SLC22A7 (OAT2) UT Mean	0			Hydration level (% water volume) [bottom] : Male	66.4	Jejunum I Channel Width CV (%)	31.68
		Abundance : SLC22A7 (OAT2) UT CV (%)	0			Hydration level (% water volume) [bottom] CV (%) : Male	4	Jejunum I Mean Thickness Mean (µm)	137.7																							Site:	PhysiologyB
		Absolute Abundance : SLC22A9 (OAT7) (pmol/10^6 hepatocytes)	1.45			SC lipid viscosity [bottom] centipose : Male	75	Jejunum I Mean Thickness CV (%)	14.42																							Parameter:	Skin Surface pH
		Abundance : SLC22A9 (OAT7) ET Mean	1			SC lipid viscosity [bottom] CV (%) : Male	0	Jejunum I Fold Expansion Mean	1.97																							Sigmoidal Male FBirth	0
		Abundance : SLC22A9 (OAT7) ET CV (%)	51			Viable Epidermis thickness µm : Male	57.36	Jejunum I Fold Expansion CV (%)	24.54																							Sigmoidal Male AdultMax	0
		Abundance : SLC22A9 (OAT7) PT Mean	0			Viable Epidermis thickness CV (%) : Male	8	Jejunum I Pore Radius Mean	8.6																							Sigmoidal Male Age50	0
		Abundance : SLC22A9 (OAT7) PT CV (%)	0			Dermis thickness µm : Male	1240	Jejunum I Pore Radius CV (%)	0																							Sigmoidal Male n	0
		Abundance : SLC22A9 (OAT7) IT Mean	0			Dermis thickness CV (%) : Male	20	Jejunum I Unstirred Layer Thickness Mean (µm)	123																							Sigmoidal Female FBirth	0
		Abundance : SLC22A9 (OAT7) IT CV (%)	0			Subcutis thickness mm : Male	9.62	Jejunum I Unstirred Layer Thickness CV (%)	3																							Sigmoidal Female AdultMax	0
		Abundance : SLC22A9 (OAT7) UT Mean	0			Subcutis thickness CV (%) : Male	48.3	Jejunum I Unstirred Layer pH	6.5																							Sigmoidal Female Age50	0
		Abundance : SLC22A9 (OAT7) UT CV (%)	0			Muscle thickness mm : Male	17.7	Jejunum I Unstirred Layer CV (%)	0.5																							Sigmoidal Female n	0
		Absolute Abundance : SLC29A1 (ENT1) (pmol/10^6 hepatocytes)	0.0646			Muscle thickness CV (%) : Male	22.67	Jejunum I ABCB1 (P-gp/MDR1) (pmol/mg total membrane protein)	0.4																							Parameter:	SC Thickness
		Abundance : SLC29A1 (ENT1) ET Mean	1			Dermis regional blood flow scalar : Male	0.839286	Jejunum I ABCC1 (MRP1) (pmol/mg total membrane protein)	0																							Sigmoidal Male FBirth	0
		Abundance : SLC29A1 (ENT1) ET CV (%)	49			Dermis regional blood flow scalar CV (%) : Male	0	Jejunum I ABCC2 (MRP2) (pmol/mg total membrane protein)	0.86																							Sigmoidal Male AdultMax	0
		Abundance : SLC29A1 (ENT1) PT Mean	0			Subcutis regional blood flow scalar : Male	1	Jejunum I ABCC3 (MRP3) (pmol/mg total membrane protein)	0.58																							Sigmoidal Male Age50	0
		Abundance : SLC29A1 (ENT1) PT CV (%)	0			Subcutis regional blood flow scalar CV (%) : Male	0	Jejunum I ABCC4 (MRP4) (pmol/mg total membrane protein)	0																							Sigmoidal Male n	0
		Abundance : SLC29A1 (ENT1) IT Mean	0			Muscle regional blood flow scalar : Male	1	Jejunum I ABCG2 (BCRP) (pmol/mg total membrane protein)	0.34																							Sigmoidal Female FBirth	0
		Abundance : SLC29A1 (ENT1) IT CV (%)	0			Muscle regional blood flow scalar CV (%) : Male	0	Jejunum I SLC2A2 (GLUT2) (pmol/mg total membrane protein)	0																							Sigmoidal Female AdultMax	0
		Abundance : SLC29A1 (ENT1) UT Mean	0					Jejunum I SLC10A2 (ASBT/IBAT) (pmol/mg total membrane protein)	0.01																							Sigmoidal Female Age50	0
		Abundance : SLC29A1 (ENT1) UT CV (%)	0			MPMLA - Thigh		Jejunum I SLC15A1 (PEPT1) (pmol/mg total membrane protein)	3.69																							Sigmoidal Female n	0
		Absolute Abundance : SLC29A2 (ENT2) (pmol/10^6 hepatocytes)	0			Skin surface pH : Male	5.5	Jejunum I SLC16A1 (MCT1) (pmol/mg total membrane protein)	0																							Parameter:	Viable Epidermis Thickness
		Abundance : SLC29A2 (ENT2) ET Mean	1			Skin surface pH CV (%) : Male	11	Jejunum I SLCO2B1 (OATP2B1) (pmol/mg total membrane protein)	0.4																							Sigmoidal Male FBirth	0
		Abundance : SLC29A2 (ENT2) ET CV (%)	60			Skin temperature °C : Male	32	Jejunum I SLCO4C1 (OATP4C1) (pmol/mg total membrane protein)	0																							Sigmoidal Male AdultMax	0
		Abundance : SLC29A2 (ENT2) PT Mean	0			Skin temperature CV (%) : Male	0	Jejunum I SLC22A1 (OCT1) (pmol/mg total membrane protein)	0.65																							Sigmoidal Male Age50	0
		Abundance : SLC29A2 (ENT2) PT CV (%)	0			Shape of corneocyte : Male	Cuboid (brick)	Jejunum I SLC22A3 (OCT3) (pmol/mg total membrane protein)	0.06																							Sigmoidal Male n	0
		Abundance : SLC29A2 (ENT2) IT Mean	0			Shape of corneocyte : Female	Cuboid (brick)	Jejunum I SLC22A4 (OCTN1) (pmol/mg total membrane protein)	0																							Sigmoidal Female FBirth	0
		Abundance : SLC29A2 (ENT2) IT CV (%)	0			Number of SC layers : Male	19	Jejunum I SLC51A/B (OST-α/β) (pmol/mg total membrane protein)	0.47																							Sigmoidal Female AdultMax	0
		Abundance : SLC29A2 (ENT2) UT Mean	0			Number of SC layers CV (%) : Male	15	Jejunum I Apical Influx (Intestine) (pmol/mg total membrane protein)	0																							Sigmoidal Female Age50	0
		Abundance : SLC29A2 (ENT2) UT CV (%)	0			Water density gm/cm3 : Male	1	Jejunum I Apical Efflux (Intestine) (pmol/mg total membrane protein)	0																							Sigmoidal Female n	0
		Absolute Abundance : SLC47A1 (MATE1) (pmol/10^6 hepatocytes)	0.146			Water density CV (%) : Male	0	Jejunum I Basolateral Influx (Intestine) (pmol/mg total membrane protein)	0																							Parameter:	Total Skin Thickness
		Abundance : SLC47A1 (MATE1) ET Mean	1			SC lipids density gm/cm3 : Male	0.9	Jejunum I Basolateral Efflux (Intestine) (pmol/mg total membrane protein)	0																							Sigmoidal Male FBirth	0
		Abundance : SLC47A1 (MATE1) ET CV (%)	51			SC lipids density CV (%) : Male	0	Jejunum I ABCB1 (P-gp/MDR1) (Relative values)	1																							Sigmoidal Male AdultMax	0
		Abundance : SLC47A1 (MATE1) PT Mean	0			SC proteins density gm/cm3 : Male	1.37	Jejunum I ABCC1 (MRP1) (Relative values)	1																							Sigmoidal Male Age50	0
		Abundance : SLC47A1 (MATE1) PT CV (%)	0			SC proteins density CV (%) : Male	0	Jejunum I ABCC2 (MRP2) (Relative values)	1																							Sigmoidal Male n	0
		Abundance : SLC47A1 (MATE1) IT Mean	0			Intercellular lipid thickness of SC µm : Male	0.091	Jejunum I ABCC3 (MRP3) (Relative values)	1																							Sigmoidal Female FBirth	0
		Abundance : SLC47A1 (MATE1) IT CV (%)	0			Intercellular lipid thickness of SC CV (%) : Male	0	Jejunum I ABCC4 (MRP4) (Relative values)	1																							Sigmoidal Female AdultMax	0
		Abundance : SLC47A1 (MATE1) UT Mean	0			Tortuosity : Male	User Defined	Jejunum I ABCG2 (BCRP) (Relative values)	1																							Sigmoidal Female Age50	0
		Abundance : SLC47A1 (MATE1) UT CV (%)	0			Tortuosity of lipid diffusion pathway of SC : Male	12.7	Jejunum I SLC2A2 (GLUT2) (Relative values)	1																							Sigmoidal Female n	0
		Absolute Abundance : SLC51A/B (OST-α/β) (pmol/10^6 hepatocytes)	0			Tortuosity of lipid diffusion pathway of SC CV (%) : Male	18	Jejunum I SLC10A2 (ASBT/IBAT) (Relative values)	1																							Parameter:	Local Subcutaneous Thickness
		Abundance : SLC51A/B (OST-α/β) ET Mean	1			Hair follicle diameter µm : Male	131.5	Jejunum I SLC15A1 (PEPT1) (Relative values)	1																							Sigmoidal Male FBirth	0
		Abundance : SLC51A/B (OST-α/β) ET CV (%)	60			Hair follicle diameter CV (%) : Male	31	Jejunum I SLC16A1 (MCT1) (Relative values)	1																							Sigmoidal Male AdultMax	0
		Abundance : SLC51A/B (OST-α/β) PT Mean	0			Hair follicle density N/cm2 : Male	17	Jejunum I SLCO2B1 (OATP2B1) (Relative values)	1																							Sigmoidal Male Age50	0
		Abundance : SLC51A/B (OST-α/β) PT CV (%)	0			Hair follicle density CV (%) : Male	24	Jejunum I SLCO4C1 (OATP4C1) (Relative values)	1																							Sigmoidal Male n	0
		Abundance : SLC51A/B (OST-α/β) IT Mean	0			Hair follicle depth µm : Male	315.1	Jejunum I SLC22A1 (OCT1) (Relative values)	1																							Sigmoidal Female FBirth	0
		Abundance : SLC51A/B (OST-α/β) IT CV (%)	0			Hair follicle depth CV (%) : Male	0	Jejunum I SLC22A3 (OCT3) (Relative values)	1																							Sigmoidal Female AdultMax	0
		Abundance : SLC51A/B (OST-α/β) UT Mean	0			Hair shaft diameter µm : Male	29.2	Jejunum I SLC22A4 (OCTN1) (Relative values)	1																							Sigmoidal Female Age50	0
		Abundance : SLC51A/B (OST-α/β) UT CV (%)	0			Hair shaft diameter CV (%) : Male	41	Jejunum I SLC51A/B (OST-α/β) (Relative values)	1																							Sigmoidal Female n	0
		Absolute Abundance : Sinusoidal Uptake (Liver) (pmol/10^6 hepatocytes)	0			Sebum viscosity centipose : Male	40	Jejunum I Apical Influx (Intestine) (Relative values)	1																							Parameter:	Local Muscle Thickness
		Abundance : Sinusoidal Uptake (Liver) ET Mean	1			Sebum viscosity CV (%) : Male	0	Jejunum I Apical Efflux (Intestine) (Relative values)	1																							Sigmoidal Male FBirth	0
		Abundance : Sinusoidal Uptake (Liver) ET CV (%)	0			Corneocyte pH [top] : Male	6.8	Jejunum I Basolateral Influx (Intestine) (Relative values)	1																							Sigmoidal Male AdultMax	0
		Abundance : Sinusoidal Uptake (Liver) PT Mean	0			Corneocyte pH [top] CV (%) : Male	6.8	Jejunum I Basolateral Efflux (Intestine) (Relative values)	1																							Sigmoidal Male Age50	0
		Abundance : Sinusoidal Uptake (Liver) PT CV (%)	0			Corneocyte thickness [top] µm : Male	0.87	Jejunum II Blood Flow (Qvilli %)	24.2																							Sigmoidal Male n	0
		Abundance : Sinusoidal Uptake (Liver) IT Mean	0			Corneocyte thickness [top] CV (%) : Male	26	Jejunum II Transit Time (% Total)	17.3																							Sigmoidal Female FBirth	0
		Abundance : Sinusoidal Uptake (Liver) IT CV (%)	0			Corneocyte width [top] µm : Male	34	Jejunum II CYP3A (% Total)	27.24																							Sigmoidal Female AdultMax	0
		Abundance : Sinusoidal Uptake (Liver) UT Mean	0			Corneocyte width [top] CV (%) : Male	15.1	Jejunum II S9PPI (% Total)	26.9																							Sigmoidal Female Age50	0
		Abundance : Sinusoidal Uptake (Liver) UT CV (%)	0			Corneocyte length [top] µm : Male	40.7	Jejunum II MPPI/CYP (% Total)	27.24																							Sigmoidal Female n	0
		Absolute Abundance : Sinusoidal Efflux (Liver) (pmol/10^6 hepatocytes)	0			Corneocyte length [top] CV (%) : Male	14.6	Jejunum II CPPI (% Total)	26.9
		Abundance : Sinusoidal Efflux (Liver) ET Mean	1			Hydration level (% water volume) [top] : Male	33.9	Jejunum II pH High Fat Fed	6.6
		Abundance : Sinusoidal Efflux (Liver) ET CV (%)	0			Hydration level (% water volume) [top] CV (%) : Male	9	Jejunum II CV pH High Fat Fed (%)	11
		Abundance : Sinusoidal Efflux (Liver) PT Mean	0			SC lipid viscosity [top] centipose : Male	75	Jejunum II pH Fed	6.6
		Abundance : Sinusoidal Efflux (Liver) PT CV (%)	0			SC lipid viscosity [top] CV (%) : Male	0	Jejunum II CV pH Fed (%)	11
		Abundance : Sinusoidal Efflux (Liver) IT Mean	0			Corneocyte pH [upper mid] : Male	6.8	Jejunum II pH Low Fat Fed	6.6
		Abundance : Sinusoidal Efflux (Liver) IT CV (%)	0			Corneocyte pH [upper mid] CV (%) : Male	6.8	Jejunum II CV pH Low Fat Fed (%)	11
		Abundance : Sinusoidal Efflux (Liver) UT Mean	0			Corneocyte thickness [upper mid] µm : Male	0.75	Jejunum II pH Fasted	6.6
		Abundance : Sinusoidal Efflux (Liver) UT CV (%)	0			Corneocyte thickness [upper mid] CV (%) : Male	26	Jejunum II CV pH Fasted (%)	11
		Absolute Abundance : Canalicular Efflux (Liver) (pmol/10^6 hepatocytes)	0			Corneocyte width [upper mid] µm : Male	34	Jejunum II Bicarbonate Buffer Concentration Fasted (mM)	9.94
		Abundance : Canalicular Efflux (Liver) ET Mean	1			Corneocyte width [upper mid] CV (%) : Male	15.1	Jejunum II Bicarbonate Buffer Concentration CV Fasted (%)	30
		Abundance : Canalicular Efflux (Liver) ET CV (%)	0			Corneocyte length [upper mid] µm : Male	40.7	Jejunum II Bicarbonate Buffer Concentration Fed (mM)	17.34
		Abundance : Canalicular Efflux (Liver) PT Mean	0			Corneocyte length [upper mid] CV (%) : Male	14.6	Jejunum II Bicarbonate Buffer Concentration CV Fed (%)	30
		Abundance : Canalicular Efflux (Liver) PT CV (%)	0			Hydration level (% water volume) [upper mid] : Male	44.6987	Jejunum II Luminal Fluid Velocity Fasted (m/s)	0.0013
		Abundance : Canalicular Efflux (Liver) IT Mean	0			Hydration level (% water volume) [upper mid] CV (%) : Male	6	Jejunum II Luminal Fluid Velocity CV Fasted (%)	56
		Abundance : Canalicular Efflux (Liver) IT CV (%)	0			SC lipid viscosity [upper mid] centipose : Male	75	Jejunum II Luminal Fluid Velocity Fed (m/s)	0.0013
		Abundance : Canalicular Efflux (Liver) UT Mean	0			SC lipid viscosity [upper mid] CV (%) : Male	0	Jejunum II Luminal Fluid Velocity CV Fed (%)	56
		Abundance : Canalicular Efflux (Liver) UT CV (%)	0			Corneocyte pH [lower mid] : Male	6.8	Jejunum II Endogenous Ion Hydrochloric Mean (mM)	126
						Corneocyte pH [lower mid] CV (%) : Male	6.8	Jejunum II Endogenous Ion Hydrochloric CV (%)	15.1
						Corneocyte thickness [lower mid] µm : Male	0.85	Jejunum II Endogenous Ion Hydrochloric Min (mM)	92
						Corneocyte thickness [lower mid] CV (%) : Male	26	Jejunum II Endogenous Ion Hydrochloric Max (mM)	181
						Corneocyte width [lower mid] µm : Male	34	Jejunum II Endogenous Ion Sodium Mean (mM)	142
						Corneocyte width [lower mid] CV (%) : Male	15.1	Jejunum II Endogenous Ion Sodium CV (%)	9.2
						Corneocyte length [lower mid] µm : Male	40.7	Jejunum II Endogenous Ion Sodium Min (mM)	111
						Corneocyte length [lower mid] CV (%) : Male	14.6	Jejunum II Endogenous Ion Sodium Max (mM)	165
						Hydration level (% water volume) [lower mid] : Male	55.5388	Jejunum II Endogenous Ion Potassium Mean (mM)	5.4
						Hydration level (% water volume) [lower mid] CV (%) : Male	5	Jejunum II Endogenous Ion Potassium CV (%)	38.9
						SC lipid viscosity [lower mid] centipose : Male	75	Jejunum II Endogenous Ion Potassium Min (mM)	1.7
						SC lipid viscosity [lower mid] CV (%) : Male	0	Jejunum II Endogenous Ion Potassium Max (mM)	11.6
						Corneocyte pH [bottom] : Male	6.8	Jejunum II Endogenous Ion Calcium Mean (mM)	0.5
						Corneocyte pH [bottom] CV (%) : Male	6.8	Jejunum II Endogenous Ion Calcium CV (%)	60
						Corneocyte thickness [bottom] µm : Male	0.96	Jejunum II Endogenous Ion Calcium Min (mM)	0.1
						Corneocyte thickness [bottom] CV (%) : Male	26	Jejunum II Endogenous Ion Calcium Max (mM)	1.3
						Corneocyte width [bottom] µm : Male	34	Jejunum II Endogenous Ion Generic Cation Mean (mM)	1
						Corneocyte width [bottom] CV (%) : Male	15.1	Jejunum II Endogenous Ion Generic Cation CV (%)	0
						Corneocyte length [bottom] µm : Male	40.7	Jejunum II Endogenous Ion Generic Cation Min (mM)	0.01
						Corneocyte length [bottom] CV (%) : Male	14.6	Jejunum II Endogenous Ion Generic Cation Max (mM)	1000
						Hydration level (% water volume) [bottom] : Male	66.4	Jejunum II Endogenous Ion Generic Anion Mean (mM)	1
						Hydration level (% water volume) [bottom] CV (%) : Male	4	Jejunum II Endogenous Ion Generic Anion CV (%)	0
						SC lipid viscosity [bottom] centipose : Male	75	Jejunum II Endogenous Ion Generic Anion Min (mM)	0.01
						SC lipid viscosity [bottom] CV (%) : Male	0	Jejunum II Endogenous Ion Generic Anion Max (mM)	1000
						Viable Epidermis thickness µm : Male	40	Jejunum II Fluid Viscosity Fasted (cP)	3
						Viable Epidermis thickness CV (%) : Male	19	Jejunum II Fluid Viscosity CV Fasted (%)	71
						Dermis thickness µm : Male	1240	Jejunum II Fluid Viscosity Fed (cP)	12
						Dermis thickness CV (%) : Male	20	Jejunum II Fluid Viscosity CV Fed (%)	14
						Subcutis thickness mm : Male	9.62	Jejunum II CMC fasted (mM)	1
						Subcutis thickness CV (%) : Male	48.3	Jejunum II CMC fed (mM)	1
						Muscle thickness mm : Male	32.81	Jejunum II Bile fasted (mM)	3.55
						Muscle thickness CV (%) : Male	38.03	Jejunum II Bile fasted CV (%)	42
						Dermis regional blood flow scalar : Male	0.839286	Jejunum II Bile fed (mM)	4.79
						Dermis regional blood flow scalar CV (%) : Male	0	Jejunum II Bile fed CV (%)	66
						Subcutis regional blood flow scalar : Male	1	Jejunum II Channel Depth Mean (µm)	448.81
						Subcutis regional blood flow scalar CV (%) : Male	0	Jejunum II Channel Depth CV (%)	21.82
						Muscle regional blood flow scalar : Male	1	Jejunum II Channel Width Mean (µm)	22.44
						Muscle regional blood flow scalar CV (%) : Male	0	Jejunum II Channel Width CV (%)	31.68
								Jejunum II Mean Thickness Mean (µm)	137.7
						MPMLA - Back		Jejunum II Mean Thickness CV (%)	14.42
						Skin surface pH : Male	5.2	Jejunum II Fold Expansion Mean	1.38
						Skin surface pH CV (%) : Male	8.4	Jejunum II Fold Expansion CV (%)	20.19
						Skin temperature °C : Male	32	Jejunum II Pore Radius Mean	8.6
						Skin temperature CV (%) : Male	0	Jejunum II Pore Radius CV (%)	0
						Shape of corneocyte : Male	Cuboid (brick)	Jejunum II Unstirred Layer Thickness Mean (µm)	123
						Shape of corneocyte : Female	Cuboid (brick)	Jejunum II Unstirred Layer Thickness CV (%)	3
						Number of SC layers : Male	17	Jejunum II Unstirred Layer pH	6.5
						Number of SC layers CV (%) : Male	16	Jejunum II Unstirred Layer CV (%)	0.5
						Water density gm/cm3 : Male	1	Jejunum II ABCB1 (P-gp/MDR1) (Relative values)	1.46
						Water density CV (%) : Male	0	Jejunum II ABCC1 (MRP1) (Relative values)	0.88
						SC lipids density gm/cm3 : Male	0.9	Jejunum II ABCC2 (MRP2) (Relative values)	1
						SC lipids density CV (%) : Male	0	Jejunum II ABCC3 (MRP3) (Relative values)	0.89
						SC proteins density gm/cm3 : Male	1.37	Jejunum II ABCC4 (MRP4) (Relative values)	1.22
						SC proteins density CV (%) : Male	0	Jejunum II ABCG2 (BCRP) (Relative values)	1
						Intercellular lipid thickness of SC µm : Male	0.091	Jejunum II SLC2A2 (GLUT2) (Relative values)	1
						Intercellular lipid thickness of SC CV (%) : Male	0	Jejunum II SLC10A2 (ASBT/IBAT) (Relative values)	4
						Tortuosity : Male	User Defined	Jejunum II SLC15A1 (PEPT1) (Relative values)	1.06
						Tortuosity of lipid diffusion pathway of SC : Male	12.7	Jejunum II SLC16A1 (MCT1) (Relative values)	1
						Tortuosity of lipid diffusion pathway of SC CV (%) : Male	18	Jejunum II SLCO2B1 (OATP2B1) (Relative values)	0.94
						Hair follicle diameter µm : Male	105.3	Jejunum II SLCO4C1 (OATP4C1) (Relative values)	1
						Hair follicle diameter CV (%) : Male	60	Jejunum II SLC22A1 (OCT1) (Relative values)	0.87
						Hair follicle density N/cm2 : Male	29	Jejunum II SLC22A3 (OCT3) (Relative values)	1.11
						Hair follicle density CV (%) : Male	31	Jejunum II SLC22A4 (OCTN1) (Relative values)	0.63
						Hair follicle depth µm : Male	446.5	Jejunum II SLC51A/B (OST-α/β) (Relative values)	1.89
						Hair follicle depth CV (%) : Male	0	Jejunum II Apical Influx (Intestine) (Relative values)	1
						Hair shaft diameter µm : Male	18.2	Jejunum II Apical Efflux (Intestine) (Relative values)	1
						Hair shaft diameter CV (%) : Male	37	Jejunum II Basolateral Influx (Intestine) (Relative values)	1
						Sebum viscosity centipose : Male	40	Jejunum II Basolateral Efflux (Intestine) (Relative values)	1
						Sebum viscosity CV (%) : Male	0	Ileum I Blood Flow (Qvilli %)	10.7
						Corneocyte pH [top] : Male	6.8	Ileum I Transit Time (% Total)	15.2
						Corneocyte pH [top] CV (%) : Male	6.8	Ileum I CYP3A (% Total)	7.94
						Corneocyte thickness [top] µm : Male	0.59	Ileum I S9PPI (% Total)	7.83
						Corneocyte thickness [top] CV (%) : Male	30	Ileum I MPPI/CYP (% Total)	7.94
						Corneocyte width [top] µm : Male	29.6	Ileum I CPPI (% Total)	7.83
						Corneocyte width [top] CV (%) : Male	5.9	Ileum I pH High Fat Fed	6.8
						Corneocyte length [top] µm : Male	36.4	Ileum I CV pH High Fat Fed (%)	10
						Corneocyte length [top] CV (%) : Male	5.7	Ileum I pH Fed	6.8
						Hydration level (% water volume) [top] : Male	33.9	Ileum I CV pH Fed (%)	10
						Hydration level (% water volume) [top] CV (%) : Male	9	Ileum I pH Low Fat Fed	6.8
						SC lipid viscosity [top] centipose : Male	75	Ileum I CV pH Low Fat Fed (%)	10
						SC lipid viscosity [top] CV (%) : Male	0	Ileum I pH Fasted	6.8
						Corneocyte pH [upper mid] : Male	6.8	Ileum I CV pH Fasted (%)	10
						Corneocyte pH [upper mid] CV (%) : Male	6.8	Ileum I Bicarbonate Buffer Concentration Fasted (mM)	30
						Corneocyte thickness [upper mid] µm : Male	0.67	Ileum I Bicarbonate Buffer Concentration CV Fasted (%)	30
						Corneocyte thickness [upper mid] CV (%) : Male	30	Ileum I Bicarbonate Buffer Concentration Fed (mM)	30
						Corneocyte width [upper mid] µm : Male	29.6	Ileum I Bicarbonate Buffer Concentration CV Fed (%)	30
						Corneocyte width [upper mid] CV (%) : Male	5.9	Ileum I Luminal Fluid Velocity Fasted (m/s)	0.0013
						Corneocyte length [upper mid] µm : Male	36.4	Ileum I Luminal Fluid Velocity CV Fasted (%)	56
						Corneocyte length [upper mid] CV (%) : Male	5.7	Ileum I Luminal Fluid Velocity Fed (m/s)	0.0013
						Hydration level (% water volume) [upper mid] : Male	44.6987	Ileum I Luminal Fluid Velocity CV Fed (%)	56
						Hydration level (% water volume) [upper mid] CV (%) : Male	6	Ileum I Endogenous Ion Hydrochloric Mean (mM)	113.3
						SC lipid viscosity [upper mid] centipose : Male	75	Ileum I Endogenous Ion Hydrochloric CV (%)	15.1
						SC lipid viscosity [upper mid] CV (%) : Male	0	Ileum I Endogenous Ion Hydrochloric Min (mM)	80.4
						Corneocyte pH [lower mid] : Male	6.8	Ileum I Endogenous Ion Hydrochloric Max (mM)	157.5
						Corneocyte pH [lower mid] CV (%) : Male	6.8	Ileum I Endogenous Ion Sodium Mean (mM)	136.3
						Corneocyte thickness [lower mid] µm : Male	0.76	Ileum I Endogenous Ion Sodium CV (%)	9.2
						Corneocyte thickness [lower mid] CV (%) : Male	30	Ileum I Endogenous Ion Sodium Min (mM)	107.4
						Corneocyte width [lower mid] µm : Male	29.6	Ileum I Endogenous Ion Sodium Max (mM)	171.8
						Corneocyte width [lower mid] CV (%) : Male	5.9	Ileum I Endogenous Ion Potassium Mean (mM)	6.1
						Corneocyte length [lower mid] µm : Male	36.4	Ileum I Endogenous Ion Potassium CV (%)	38.9
						Corneocyte length [lower mid] CV (%) : Male	5.7	Ileum I Endogenous Ion Potassium Min (mM)	4.6
						Hydration level (% water volume) [lower mid] : Male	55.5388	Ileum I Endogenous Ion Potassium Max (mM)	8
						Hydration level (% water volume) [lower mid] CV (%) : Male	5	Ileum I Endogenous Ion Calcium Mean (mM)	0.5
						SC lipid viscosity [lower mid] centipose : Male	75	Ileum I Endogenous Ion Calcium CV (%)	60
						SC lipid viscosity [lower mid] CV (%) : Male	0	Ileum I Endogenous Ion Calcium Min (mM)	0.1
						Corneocyte pH [bottom] : Male	6.8	Ileum I Endogenous Ion Calcium Max (mM)	1.3
						Corneocyte pH [bottom] CV (%) : Male	6.8	Ileum I Endogenous Ion Generic Cation Mean (mM)	1
						Corneocyte thickness [bottom] µm : Male	0.86	Ileum I Endogenous Ion Generic Cation CV (%)	0
						Corneocyte thickness [bottom] CV (%) : Male	30	Ileum I Endogenous Ion Generic Cation Min (mM)	0.01
						Corneocyte width [bottom] µm : Male	29.6	Ileum I Endogenous Ion Generic Cation Max (mM)	1000
						Corneocyte width [bottom] CV (%) : Male	5.9	Ileum I Endogenous Ion Generic Anion Mean (mM)	1
						Corneocyte length [bottom] µm : Male	36.4	Ileum I Endogenous Ion Generic Anion CV (%)	0
						Corneocyte length [bottom] CV (%) : Male	5.7	Ileum I Endogenous Ion Generic Anion Min (mM)	0.01
						Hydration level (% water volume) [bottom] : Male	66.4	Ileum I Endogenous Ion Generic Anion Max (mM)	1000
						Hydration level (% water volume) [bottom] CV (%) : Male	4	Ileum I Fluid Viscosity Fasted (cP)	3
						SC lipid viscosity [bottom] centipose : Male	75	Ileum I Fluid Viscosity CV Fasted (%)	71
						SC lipid viscosity [bottom] CV (%) : Male	0	Ileum I Fluid Viscosity Fed (cP)	9
						Viable Epidermis thickness µm : Male	45.655	Ileum I Fluid Viscosity CV Fed (%)	2
						Viable Epidermis thickness CV (%) : Male	15	Ileum I CMC fasted (mM)	1
						Dermis thickness µm : Male	1240	Ileum I CMC fed (mM)	1
						Dermis thickness CV (%) : Male	20	Ileum I Bile fasted (mM)	1.25
						Subcutis thickness mm : Male	6.93	Ileum I Bile fasted CV (%)	30
						Subcutis thickness CV (%) : Male	34.9	Ileum I Bile fed (mM)	5.86
						Muscle thickness mm : Male	19.3	Ileum I Bile fed CV (%)	84
						Muscle thickness CV (%) : Male	6.22	Ileum I Channel Depth Mean (µm)	289.94
						Dermis regional blood flow scalar : Male	1.03512	Ileum I Channel Depth CV (%)	49.37
						Dermis regional blood flow scalar CV (%) : Male	0	Ileum I Channel Width Mean (µm)	56.19
						Subcutis regional blood flow scalar : Male	1	Ileum I Channel Width CV (%)	30
						Subcutis regional blood flow scalar CV (%) : Male	0	Ileum I Mean Thickness Mean (µm)	127
						Muscle regional blood flow scalar : Male	1	Ileum I Mean Thickness CV (%)	30
						Muscle regional blood flow scalar CV (%) : Male	0	Ileum I Fold Expansion Mean	1.1
								Ileum I Fold Expansion CV (%)	9.15
						MPMLA - Physiology B		Ileum I Pore Radius Mean	8.6
						Skin surface pH : Male	0	Ileum I Pore Radius CV (%)	0
						Skin surface pH CV (%) : Male	0	Ileum I Unstirred Layer Thickness Mean (µm)	480
						Skin temperature °C : Male	0	Ileum I Unstirred Layer Thickness CV (%)	10
						Skin temperature CV (%) : Male	0	Ileum I Unstirred Layer pH	6.5
						Shape of corneocyte : Male	Cuboid (brick)	Ileum I Unstirred Layer CV (%)	0.5
						Shape of corneocyte : Female	Cuboid (brick)	Ileum I ABCB1 (P-gp/MDR1) (Relative values)	1.5
						Number of SC layers : Male	0	Ileum I ABCC1 (MRP1) (Relative values)	0.86
						Number of SC layers CV (%) : Male	0	Ileum I ABCC2 (MRP2) (Relative values)	0.6
						Water density gm/cm3 : Male	0	Ileum I ABCC3 (MRP3) (Relative values)	1.54
						Water density CV (%) : Male	0	Ileum I ABCC4 (MRP4) (Relative values)	1.71
						SC lipids density gm/cm3 : Male	0	Ileum I ABCG2 (BCRP) (Relative values)	0.78
						SC lipids density CV (%) : Male	0	Ileum I SLC2A2 (GLUT2) (Relative values)	1
						SC proteins density gm/cm3 : Male	0	Ileum I SLC10A2 (ASBT/IBAT) (Relative values)	98.44
						SC proteins density CV (%) : Male	0	Ileum I SLC15A1 (PEPT1) (Relative values)	1.23
						Intercellular lipid thickness of SC µm : Male	0	Ileum I SLC16A1 (MCT1) (Relative values)	1.29
						Intercellular lipid thickness of SC CV (%) : Male	0	Ileum I SLCO2B1 (OATP2B1) (Relative values)	1.28
						Tortuosity : Male	User Defined	Ileum I SLCO4C1 (OATP4C1) (Relative values)	1
						Tortuosity of lipid diffusion pathway of SC : Male	0	Ileum I SLC22A1 (OCT1) (Relative values)	1.29
						Tortuosity of lipid diffusion pathway of SC CV (%) : Male	0	Ileum I SLC22A3 (OCT3) (Relative values)	1.08
						Hair follicle diameter µm : Male	0	Ileum I SLC22A4 (OCTN1) (Relative values)	0.78
						Hair follicle diameter CV (%) : Male	0	Ileum I SLC51A/B (OST-α/β) (Relative values)	1.08
						Hair follicle density N/cm2 : Male	0	Ileum I Apical Influx (Intestine) (Relative values)	1
						Hair follicle density CV (%) : Male	0	Ileum I Apical Efflux (Intestine) (Relative values)	1
						Hair follicle depth µm : Male	0	Ileum I Basolateral Influx (Intestine) (Relative values)	1
						Hair follicle depth CV (%) : Male	0	Ileum I Basolateral Efflux (Intestine) (Relative values)	1
						Hair shaft diameter µm : Male	0	Ileum II Blood Flow (Qvilli %)	10.7
						Hair shaft diameter CV (%) : Male	0	Ileum II Transit Time (% Total)	15.2
						Sebum viscosity centipose : Male	0	Ileum II CYP3A (% Total)	7.94
						Sebum viscosity CV (%) : Male	0	Ileum II S9PPI (% Total)	7.83
						Corneocyte pH [top] : Male	0	Ileum II MPPI/CYP (% Total)	7.94
						Corneocyte pH [top] CV (%) : Male	0	Ileum II CPPI (% Total)	7.83
						Corneocyte thickness [top] µm : Male	0	Ileum II pH High Fat Fed	7
						Corneocyte thickness [top] CV (%) : Male	0	Ileum II CV pH High Fat Fed (%)	10
						Corneocyte width [top] µm : Male	0	Ileum II pH Fed	7
						Corneocyte width [top] CV (%) : Male	0	Ileum II CV pH Fed (%)	10
						Corneocyte length [top] µm : Male	0	Ileum II pH Low Fat Fed	7
						Corneocyte length [top] CV (%) : Male	0	Ileum II CV pH Low Fat Fed (%)	10
						Hydration level (% water volume) [top] : Male	0	Ileum II pH Fasted	7
						Hydration level (% water volume) [top] CV (%) : Male	0	Ileum II CV pH Fasted (%)	10
						SC lipid viscosity [top] centipose : Male	0	Ileum II Bicarbonate Buffer Concentration Fasted (mM)	30
						SC lipid viscosity [top] CV (%) : Male	0	Ileum II Bicarbonate Buffer Concentration CV Fasted (%)	30
						Corneocyte pH [upper mid] : Male	0	Ileum II Bicarbonate Buffer Concentration Fed (mM)	30
						Corneocyte pH [upper mid] CV (%) : Male	0	Ileum II Bicarbonate Buffer Concentration CV Fed (%)	30
						Corneocyte thickness [upper mid] µm : Male	0	Ileum II Luminal Fluid Velocity Fasted (m/s)	0.0013
						Corneocyte thickness [upper mid] CV (%) : Male	0	Ileum II Luminal Fluid Velocity CV Fasted (%)	56
						Corneocyte width [upper mid] µm : Male	0	Ileum II Luminal Fluid Velocity Fed (m/s)	0.0013
						Corneocyte width [upper mid] CV (%) : Male	0	Ileum II Luminal Fluid Velocity CV Fed (%)	56
						Corneocyte length [upper mid] µm : Male	0	Ileum II Endogenous Ion Hydrochloric Mean (mM)	100.5
						Corneocyte length [upper mid] CV (%) : Male	0	Ileum II Endogenous Ion Hydrochloric CV (%)	15.1
						Hydration level (% water volume) [upper mid] : Male	0	Ileum II Endogenous Ion Hydrochloric Min (mM)	71.4
						Hydration level (% water volume) [upper mid] CV (%) : Male	0	Ileum II Endogenous Ion Hydrochloric Max (mM)	139.7
						SC lipid viscosity [upper mid] centipose : Male	0	Ileum II Endogenous Ion Sodium Mean (mM)	130.5
						SC lipid viscosity [upper mid] CV (%) : Male	0	Ileum II Endogenous Ion Sodium CV (%)	9.2
						Corneocyte pH [lower mid] : Male	0	Ileum II Endogenous Ion Sodium Min (mM)	102.8
						Corneocyte pH [lower mid] CV (%) : Male	0	Ileum II Endogenous Ion Sodium Max (mM)	164.6
						Corneocyte thickness [lower mid] µm : Male	0	Ileum II Endogenous Ion Potassium Mean (mM)	6.7
						Corneocyte thickness [lower mid] CV (%) : Male	0	Ileum II Endogenous Ion Potassium CV (%)	38.9
						Corneocyte width [lower mid] µm : Male	0	Ileum II Endogenous Ion Potassium Min (mM)	5
						Corneocyte width [lower mid] CV (%) : Male	0	Ileum II Endogenous Ion Potassium Max (mM)	8.8
						Corneocyte length [lower mid] µm : Male	0	Ileum II Endogenous Ion Calcium Mean (mM)	0.5
						Corneocyte length [lower mid] CV (%) : Male	0	Ileum II Endogenous Ion Calcium CV (%)	60
						Hydration level (% water volume) [lower mid] : Male	0	Ileum II Endogenous Ion Calcium Min (mM)	0.1
						Hydration level (% water volume) [lower mid] CV (%) : Male	0	Ileum II Endogenous Ion Calcium Max (mM)	1.3
						SC lipid viscosity [lower mid] centipose : Male	0	Ileum II Endogenous Ion Generic Cation Mean (mM)	1
						SC lipid viscosity [lower mid] CV (%) : Male	0	Ileum II Endogenous Ion Generic Cation CV (%)	0
						Corneocyte pH [bottom] : Male	0	Ileum II Endogenous Ion Generic Cation Min (mM)	0.01
						Corneocyte pH [bottom] CV (%) : Male	0	Ileum II Endogenous Ion Generic Cation Max (mM)	1000
						Corneocyte thickness [bottom] µm : Male	0	Ileum II Endogenous Ion Generic Anion Mean (mM)	1
						Corneocyte thickness [bottom] CV (%) : Male	0	Ileum II Endogenous Ion Generic Anion CV (%)	0
						Corneocyte width [bottom] µm : Male	0	Ileum II Endogenous Ion Generic Anion Min (mM)	0.01
						Corneocyte width [bottom] CV (%) : Male	0	Ileum II Endogenous Ion Generic Anion Max (mM)	1000
						Corneocyte length [bottom] µm : Male	0	Ileum II Fluid Viscosity Fasted (cP)	3
						Corneocyte length [bottom] CV (%) : Male	0	Ileum II Fluid Viscosity CV Fasted (%)	71
						Hydration level (% water volume) [bottom] : Male	0	Ileum II Fluid Viscosity Fed (cP)	3
						Hydration level (% water volume) [bottom] CV (%) : Male	0	Ileum II Fluid Viscosity CV Fed (%)	71
						SC lipid viscosity [bottom] centipose : Male	0	Ileum II CMC fasted (mM)	1
						SC lipid viscosity [bottom] CV (%) : Male	0	Ileum II CMC fed (mM)	1
						Viable Epidermis thickness µm : Male	0	Ileum II Bile fasted (mM)	1.25
						Viable Epidermis thickness CV (%) : Male	0	Ileum II Bile fasted CV (%)	30
						Dermis thickness µm : Male	0	Ileum II Bile fed (mM)	8.61
						Dermis thickness CV (%) : Male	0	Ileum II Bile fed CV (%)	88
						Subcutis thickness mm : Male	0	Ileum II Channel Depth Mean (µm)	289.94
						Subcutis thickness CV (%) : Male	0	Ileum II Channel Depth CV (%)	49.37
						Muscle thickness mm : Male	0	Ileum II Channel Width Mean (µm)	56.19
						Muscle thickness CV (%) : Male	0	Ileum II Channel Width CV (%)	30
						Dermis regional blood flow scalar : Male	0	Ileum II Mean Thickness Mean (µm)	127
						Dermis regional blood flow scalar CV (%) : Male	0	Ileum II Mean Thickness CV (%)	30
						Subcutis regional blood flow scalar : Male	0	Ileum II Fold Expansion Mean	1.1
						Subcutis regional blood flow scalar CV (%) : Male	0	Ileum II Fold Expansion CV (%)	9.15
						Muscle regional blood flow scalar : Male	0	Ileum II Pore Radius Mean	8.6
						Muscle regional blood flow scalar CV (%) : Male	0	Ileum II Pore Radius CV (%)	0
								Ileum II Unstirred Layer Thickness Mean (µm)	480
						MPMLA - Forehead		Ileum II Unstirred Layer Thickness CV (%)	10
						Skin surface pH : Female	5	Ileum II Unstirred Layer pH	6.5
						Skin surface pH CV (%) : Female	8.9	Ileum II Unstirred Layer CV (%)	0.5
						Skin temperature °C : Female	32	Ileum II ABCB1 (P-gp/MDR1) (Relative values)	1.51
						Skin temperature CV (%) : Female	0	Ileum II ABCC1 (MRP1) (Relative values)	0.86
						Shape of corneocyte : Male	Cuboid (brick)	Ileum II ABCC2 (MRP2) (Relative values)	0.6
						Shape of corneocyte : Female	Cuboid (brick)	Ileum II ABCC3 (MRP3) (Relative values)	1.54
						Number of SC layers : Female	12	Ileum II ABCC4 (MRP4) (Relative values)	1.71
						Number of SC layers CV (%) : Female	8	Ileum II ABCG2 (BCRP) (Relative values)	0.78
						Water density gm/cm3 : Female	1	Ileum II SLC2A2 (GLUT2) (Relative values)	1
						Water density CV (%) : Female	0	Ileum II SLC10A2 (ASBT/IBAT) (Relative values)	98.44
						SC lipids density gm/cm3 : Female	0.9	Ileum II SLC15A1 (PEPT1) (Relative values)	1.23
						SC lipids density CV (%) : Female	0	Ileum II SLC16A1 (MCT1) (Relative values)	1.29
						SC proteins density gm/cm3 : Female	1.37	Ileum II SLCO2B1 (OATP2B1) (Relative values)	1.28
						SC proteins density CV (%) : Female	0	Ileum II SLCO4C1 (OATP4C1) (Relative values)	1
						Intercellular lipid thickness of SC µm : Female	0.091	Ileum II SLC22A1 (OCT1) (Relative values)	1.29
						Intercellular lipid thickness of SC CV (%) : Female	0	Ileum II SLC22A3 (OCT3) (Relative values)	1.08
						Tortuosity : Female	User Defined	Ileum II SLC22A4 (OCTN1) (Relative values)	0.78
						Tortuosity of lipid diffusion pathway of SC : Female	12.7	Ileum II SLC51A/B (OST-α/β) (Relative values)	1.08
						Tortuosity of lipid diffusion pathway of SC CV (%) : Female	18	Ileum II Apical Influx (Intestine) (Relative values)	1
						Hair follicle diameter µm : Female	65.4	Ileum II Apical Efflux (Intestine) (Relative values)	1
						Hair follicle diameter CV (%) : Female	83	Ileum II Basolateral Influx (Intestine) (Relative values)	1
						Hair follicle density N/cm2 : Female	292	Ileum II Basolateral Efflux (Intestine) (Relative values)	1
						Hair follicle density CV (%) : Female	16	Ileum III Blood Flow (Qvilli %)	10.7
						Hair follicle depth µm : Female	204.8	Ileum III Transit Time (% Total)	15.2
						Hair follicle depth CV (%) : Female	0	Ileum III CYP3A (% Total)	7.94
						Hair shaft diameter µm : Female	15.9	Ileum III S9PPI (% Total)	7.83
						Hair shaft diameter CV (%) : Female	57	Ileum III MPPI/CYP (% Total)	7.94
						Sebum viscosity centipose : Female	40	Ileum III CPPI (% Total)	7.83
						Sebum viscosity CV (%) : Female	0	Ileum III pH High Fat Fed	7.1
						Corneocyte pH [top] : Female	6.8	Ileum III CV pH High Fat Fed (%)	7
						Corneocyte pH [top] CV (%) : Female	6.8	Ileum III pH Fed	7.1
						Corneocyte thickness [top] µm : Female	0.71	Ileum III CV pH Fed (%)	7
						Corneocyte thickness [top] CV (%) : Female	36	Ileum III pH Low Fat Fed	7.1
						Corneocyte width [top] µm : Female	27.7	Ileum III CV pH Low Fat Fed (%)	7
						Corneocyte width [top] CV (%) : Female	9.2	Ileum III pH Fasted	7.1
						Corneocyte length [top] µm : Female	34.2	Ileum III CV pH Fasted (%)	7
						Corneocyte length [top] CV (%) : Female	4.1	Ileum III Bicarbonate Buffer Concentration Fasted (mM)	30
						Hydration level (% water volume) [top] : Female	35.5	Ileum III Bicarbonate Buffer Concentration CV Fasted (%)	30
						Hydration level (% water volume) [top] CV (%) : Female	17	Ileum III Bicarbonate Buffer Concentration Fed (mM)	30
						SC lipid viscosity [top] centipose : Female	75	Ileum III Bicarbonate Buffer Concentration CV Fed (%)	30
						SC lipid viscosity [top] CV (%) : Female	0	Ileum III Luminal Fluid Velocity Fasted (m/s)	0.0013
						Corneocyte pH [upper mid] : Female	6.8	Ileum III Luminal Fluid Velocity CV Fasted (%)	56
						Corneocyte pH [upper mid] CV (%) : Female	6.8	Ileum III Luminal Fluid Velocity Fed (m/s)	0.0013
						Corneocyte thickness [upper mid] µm : Female	0.81	Ileum III Luminal Fluid Velocity CV Fed (%)	56
						Corneocyte thickness [upper mid] CV (%) : Female	36	Ileum III Endogenous Ion Hydrochloric Mean (mM)	84
						Corneocyte width [upper mid] µm : Female	27.7	Ileum III Endogenous Ion Hydrochloric CV (%)	15.1
						Corneocyte width [upper mid] CV (%) : Female	9.2	Ileum III Endogenous Ion Hydrochloric Min (mM)	59.6
						Corneocyte length [upper mid] µm : Female	34.2	Ileum III Endogenous Ion Hydrochloric Max (mM)	116.7
						Corneocyte length [upper mid] CV (%) : Female	4.1	Ileum III Endogenous Ion Sodium Mean (mM)	128.9
						Hydration level (% water volume) [upper mid] : Female	46.1	Ileum III Endogenous Ion Sodium CV (%)	9.2
						Hydration level (% water volume) [upper mid] CV (%) : Female	11	Ileum III Endogenous Ion Sodium Min (mM)	101.5
						SC lipid viscosity [upper mid] centipose : Female	75	Ileum III Endogenous Ion Sodium Max (mM)	162.5
						SC lipid viscosity [upper mid] CV (%) : Female	0	Ileum III Endogenous Ion Potassium Mean (mM)	6.3
						Corneocyte pH [lower mid] : Female	6.8	Ileum III Endogenous Ion Potassium CV (%)	38.9
						Corneocyte pH [lower mid] CV (%) : Female	6.8	Ileum III Endogenous Ion Potassium Min (mM)	4.7
						Corneocyte thickness [lower mid] µm : Female	0.91	Ileum III Endogenous Ion Potassium Max (mM)	8.3
						Corneocyte thickness [lower mid] CV (%) : Female	36	Ileum III Endogenous Ion Calcium Mean (mM)	0.5
						Corneocyte width [lower mid] µm : Female	27.7	Ileum III Endogenous Ion Calcium CV (%)	60
						Corneocyte width [lower mid] CV (%) : Female	9.2	Ileum III Endogenous Ion Calcium Min (mM)	0.1
						Corneocyte length [lower mid] µm : Female	34.2	Ileum III Endogenous Ion Calcium Max (mM)	1.3
						Corneocyte length [lower mid] CV (%) : Female	4.1	Ileum III Endogenous Ion Generic Cation Mean (mM)	1
						Hydration level (% water volume) [lower mid] : Female	56.75	Ileum III Endogenous Ion Generic Cation CV (%)	0
						Hydration level (% water volume) [lower mid] CV (%) : Female	7	Ileum III Endogenous Ion Generic Cation Min (mM)	0.01
						SC lipid viscosity [lower mid] centipose : Female	75	Ileum III Endogenous Ion Generic Cation Max (mM)	1000
						SC lipid viscosity [lower mid] CV (%) : Female	0	Ileum III Endogenous Ion Generic Anion Mean (mM)	1
						Corneocyte pH [bottom] : Female	6.8	Ileum III Endogenous Ion Generic Anion CV (%)	0
						Corneocyte pH [bottom] CV (%) : Female	6.8	Ileum III Endogenous Ion Generic Anion Min (mM)	0.01
						Corneocyte thickness [bottom] µm : Female	1.03	Ileum III Endogenous Ion Generic Anion Max (mM)	1000
						Corneocyte thickness [bottom] CV (%) : Female	36	Ileum III Fluid Viscosity Fasted (cP)	3
						Corneocyte width [bottom] µm : Female	27.7	Ileum III Fluid Viscosity CV Fasted (%)	71
						Corneocyte width [bottom] CV (%) : Female	9.2	Ileum III Fluid Viscosity Fed (cP)	3
						Corneocyte length [bottom] µm : Female	34.2	Ileum III Fluid Viscosity CV Fed (%)	71
						Corneocyte length [bottom] CV (%) : Female	4.1	Ileum III CMC fasted (mM)	1
						Hydration level (% water volume) [bottom] : Female	67.4	Ileum III CMC fed (mM)	1
						Hydration level (% water volume) [bottom] CV (%) : Female	4	Ileum III Bile fasted (mM)	1.25
						SC lipid viscosity [bottom] centipose : Female	75	Ileum III Bile fasted CV (%)	30
						SC lipid viscosity [bottom] CV (%) : Female	0	Ileum III Bile fed (mM)	8.06
						Viable Epidermis thickness µm : Female	50.05	Ileum III Bile fed CV (%)	65
						Viable Epidermis thickness CV (%) : Female	7	Ileum III Channel Depth Mean (µm)	289.94
						Dermis thickness µm : Female	1250	Ileum III Channel Depth CV (%)	49.37
						Dermis thickness CV (%) : Female	45	Ileum III Channel Width Mean (µm)	56.19
						Subcutis thickness mm : Female	1.91	Ileum III Channel Width CV (%)	30
						Subcutis thickness CV (%) : Female	55.7	Ileum III Mean Thickness Mean (µm)	127
						Muscle thickness mm : Female	1.37	Ileum III Mean Thickness CV (%)	30
						Muscle thickness CV (%) : Female	4.38	Ileum III Fold Expansion Mean	1.08
						Dermis regional blood flow scalar : Female	2.13	Ileum III Fold Expansion CV (%)	16.07
						Dermis regional blood flow scalar CV (%) : Female	0	Ileum III Pore Radius Mean	8.6
						Subcutis regional blood flow scalar : Female	1	Ileum III Pore Radius CV (%)	0
						Subcutis regional blood flow scalar CV (%) : Female	0	Ileum III Unstirred Layer Thickness Mean (µm)	480
						Muscle regional blood flow scalar : Female	1	Ileum III Unstirred Layer Thickness CV (%)	10
						Muscle regional blood flow scalar CV (%) : Female	0	Ileum III Unstirred Layer pH	6.5
								Ileum III Unstirred Layer CV (%)	0.5
						MPMLA - Forearm Inner (volar)		Ileum III ABCB1 (P-gp/MDR1) (Relative values)	1.52
						Skin surface pH : Female	5.2	Ileum III ABCC1 (MRP1) (Relative values)	0.89
						Skin surface pH CV (%) : Female	8.1	Ileum III ABCC2 (MRP2) (Relative values)	0.6
						Skin temperature °C : Female	32	Ileum III ABCC3 (MRP3) (Relative values)	1.6
						Skin temperature CV (%) : Female	0	Ileum III ABCC4 (MRP4) (Relative values)	1.2
						Shape of corneocyte : Male	Cuboid (brick)	Ileum III ABCG2 (BCRP) (Relative values)	0.78
						Shape of corneocyte : Female	Cuboid (brick)	Ileum III SLC2A2 (GLUT2) (Relative values)	1
						Number of SC layers : Female	22	Ileum III SLC10A2 (ASBT/IBAT) (Relative values)	109.18
						Number of SC layers CV (%) : Female	20	Ileum III SLC15A1 (PEPT1) (Relative values)	1.24
						Water density gm/cm3 : Female	1	Ileum III SLC16A1 (MCT1) (Relative values)	1.29
						Water density CV (%) : Female	0	Ileum III SLCO2B1 (OATP2B1) (Relative values)	1.28
						SC lipids density gm/cm3 : Female	0.9	Ileum III SLCO4C1 (OATP4C1) (Relative values)	1
						SC lipids density CV (%) : Female	0	Ileum III SLC22A1 (OCT1) (Relative values)	1.3
						SC proteins density gm/cm3 : Female	1.37	Ileum III SLC22A3 (OCT3) (Relative values)	1.23
						SC proteins density CV (%) : Female	0	Ileum III SLC22A4 (OCTN1) (Relative values)	0.8
						Intercellular lipid thickness of SC µm : Female	0.091	Ileum III SLC51A/B (OST-α/β) (Relative values)	0.93
						Intercellular lipid thickness of SC CV (%) : Female	0	Ileum III Apical Influx (Intestine) (Relative values)	1
						Tortuosity : Female	User Defined	Ileum III Apical Efflux (Intestine) (Relative values)	1
						Tortuosity of lipid diffusion pathway of SC : Female	12.7	Ileum III Basolateral Influx (Intestine) (Relative values)	1
						Tortuosity of lipid diffusion pathway of SC CV (%) : Female	18	Ileum III Basolateral Efflux (Intestine) (Relative values)	1
						Hair follicle diameter µm : Female	77.7	Ileum IV Blood Flow (Qvilli %)	10.7
						Hair follicle diameter CV (%) : Female	32	Ileum IV Transit Time (% Total)	15.2
						Hair follicle density N/cm2 : Female	18	Ileum IV CYP3A (% Total)	7.94
						Hair follicle density CV (%) : Female	39	Ileum IV S9PPI (% Total)	7.83
						Hair follicle depth µm : Female	109.5	Ileum IV MPPI/CYP (% Total)	7.94
						Hair follicle depth CV (%) : Female	0	Ileum IV CPPI (% Total)	7.83
						Hair shaft diameter µm : Female	18	Ileum IV pH High Fat Fed	7.3
						Hair shaft diameter CV (%) : Female	34	Ileum IV CV pH High Fat Fed (%)	6
						Sebum viscosity centipose : Female	40	Ileum IV pH Fed	7.3
						Sebum viscosity CV (%) : Female	0	Ileum IV CV pH Fed (%)	6
						Corneocyte pH [top] : Female	6.8	Ileum IV pH Low Fat Fed	7.3
						Corneocyte pH [top] CV (%) : Female	6.8	Ileum IV CV pH Low Fat Fed (%)	6
						Corneocyte thickness [top] µm : Female	0.59	Ileum IV pH Fasted	7.3
						Corneocyte thickness [top] CV (%) : Female	22	Ileum IV CV pH Fasted (%)	6
						Corneocyte width [top] µm : Female	29.6	Ileum IV Bicarbonate Buffer Concentration Fasted (mM)	30
						Corneocyte width [top] CV (%) : Female	5.9	Ileum IV Bicarbonate Buffer Concentration CV Fasted (%)	30
						Corneocyte length [top] µm : Female	36.4	Ileum IV Bicarbonate Buffer Concentration Fed (mM)	30
						Corneocyte length [top] CV (%) : Female	5.7	Ileum IV Bicarbonate Buffer Concentration CV Fed (%)	30
						Hydration level (% water volume) [top] : Female	33.9	Ileum IV Luminal Fluid Velocity Fasted (m/s)	0.0013
						Hydration level (% water volume) [top] CV (%) : Female	9	Ileum IV Luminal Fluid Velocity CV Fasted (%)	56
						SC lipid viscosity [top] centipose : Female	75	Ileum IV Luminal Fluid Velocity Fed (m/s)	0.0013
						SC lipid viscosity [top] CV (%) : Female	0	Ileum IV Luminal Fluid Velocity CV Fed (%)	56
						Corneocyte pH [upper mid] : Female	6.8	Ileum IV Endogenous Ion Hydrochloric Mean (mM)	67.4
						Corneocyte pH [upper mid] CV (%) : Female	6.8	Ileum IV Endogenous Ion Hydrochloric CV (%)	15.1
						Corneocyte thickness [upper mid] µm : Female	0.67	Ileum IV Endogenous Ion Hydrochloric Min (mM)	58
						Corneocyte thickness [upper mid] CV (%) : Female	22	Ileum IV Endogenous Ion Hydrochloric Max (mM)	79
						Corneocyte width [upper mid] µm : Female	29.6	Ileum IV Endogenous Ion Sodium Mean (mM)	127.2
						Corneocyte width [upper mid] CV (%) : Female	5.9	Ileum IV Endogenous Ion Sodium CV (%)	9.2
						Corneocyte length [upper mid] µm : Female	36.4	Ileum IV Endogenous Ion Sodium Min (mM)	112
						Corneocyte length [upper mid] CV (%) : Female	5.7	Ileum IV Endogenous Ion Sodium Max (mM)	138
						Hydration level (% water volume) [upper mid] : Female	44.6987	Ileum IV Endogenous Ion Potassium Mean (mM)	5.9
						Hydration level (% water volume) [upper mid] CV (%) : Female	6	Ileum IV Endogenous Ion Potassium CV (%)	38.9
						SC lipid viscosity [upper mid] centipose : Female	75	Ileum IV Endogenous Ion Potassium Min (mM)	5.3
						SC lipid viscosity [upper mid] CV (%) : Female	0	Ileum IV Endogenous Ion Potassium Max (mM)	6.5
						Corneocyte pH [lower mid] : Female	6.8	Ileum IV Endogenous Ion Calcium Mean (mM)	0.5
						Corneocyte pH [lower mid] CV (%) : Female	6.8	Ileum IV Endogenous Ion Calcium CV (%)	60
						Corneocyte thickness [lower mid] µm : Female	0.76	Ileum IV Endogenous Ion Calcium Min (mM)	0.1
						Corneocyte thickness [lower mid] CV (%) : Female	22	Ileum IV Endogenous Ion Calcium Max (mM)	1.3
						Corneocyte width [lower mid] µm : Female	29.6	Ileum IV Endogenous Ion Generic Cation Mean (mM)	1
						Corneocyte width [lower mid] CV (%) : Female	5.9	Ileum IV Endogenous Ion Generic Cation CV (%)	0
						Corneocyte length [lower mid] µm : Female	36.4	Ileum IV Endogenous Ion Generic Cation Min (mM)	0.01
						Corneocyte length [lower mid] CV (%) : Female	5.7	Ileum IV Endogenous Ion Generic Cation Max (mM)	1000
						Hydration level (% water volume) [lower mid] : Female	55.5388	Ileum IV Endogenous Ion Generic Anion Mean (mM)	1
						Hydration level (% water volume) [lower mid] CV (%) : Female	5	Ileum IV Endogenous Ion Generic Anion CV (%)	0
						SC lipid viscosity [lower mid] centipose : Female	75	Ileum IV Endogenous Ion Generic Anion Min (mM)	0.01
						SC lipid viscosity [lower mid] CV (%) : Female	0	Ileum IV Endogenous Ion Generic Anion Max (mM)	1000
						Corneocyte pH [bottom] : Female	6.8	Ileum IV Fluid Viscosity Fasted (cP)	3
						Corneocyte pH [bottom] CV (%) : Female	6.8	Ileum IV Fluid Viscosity CV Fasted (%)	71
						Corneocyte thickness [bottom] µm : Female	0.86	Ileum IV Fluid Viscosity Fed (cP)	3
						Corneocyte thickness [bottom] CV (%) : Female	22	Ileum IV Fluid Viscosity CV Fed (%)	71
						Corneocyte width [bottom] µm : Female	29.6	Ileum IV CMC fasted (mM)	1
						Corneocyte width [bottom] CV (%) : Female	5.9	Ileum IV CMC fed (mM)	1
						Corneocyte length [bottom] µm : Female	36.4	Ileum IV Bile fasted (mM)	1.25
						Corneocyte length [bottom] CV (%) : Female	5.7	Ileum IV Bile fasted CV (%)	30
						Hydration level (% water volume) [bottom] : Female	66.4	Ileum IV Bile fed (mM)	5.96
						Hydration level (% water volume) [bottom] CV (%) : Female	4	Ileum IV Bile fed CV (%)	65
						SC lipid viscosity [bottom] centipose : Female	75	Ileum IV Channel Depth Mean (µm)	289.94
						SC lipid viscosity [bottom] CV (%) : Female	0	Ileum IV Channel Depth CV (%)	49.37
						Viable Epidermis thickness µm : Female	41.9655	Ileum IV Channel Width Mean (µm)	56.19
						Viable Epidermis thickness CV (%) : Female	19	Ileum IV Channel Width CV (%)	30
						Dermis thickness µm : Female	1240	Ileum IV Mean Thickness Mean (µm)	127
						Dermis thickness CV (%) : Female	20	Ileum IV Mean Thickness CV (%)	30
						Subcutis thickness mm : Female	1.91	Ileum IV Fold Expansion Mean	1.04
						Subcutis thickness CV (%) : Female	55.7	Ileum IV Fold Expansion CV (%)	12.4
						Muscle thickness mm : Female	23.81	Ileum IV Pore Radius Mean	8.6
						Muscle thickness CV (%) : Female	14.85	Ileum IV Pore Radius CV (%)	0
						Dermis regional blood flow scalar : Female	0.909226	Ileum IV Unstirred Layer Thickness Mean (µm)	480
						Dermis regional blood flow scalar CV (%) : Female	0	Ileum IV Unstirred Layer Thickness CV (%)	10
						Subcutis regional blood flow scalar : Female	1	Ileum IV Unstirred Layer pH	6.5
						Subcutis regional blood flow scalar CV (%) : Female	0	Ileum IV Unstirred Layer CV (%)	0.5
						Muscle regional blood flow scalar : Female	1	Ileum IV ABCB1 (P-gp/MDR1) (Relative values)	1.51
						Muscle regional blood flow scalar CV (%) : Female	0	Ileum IV ABCC1 (MRP1) (Relative values)	0.89
								Ileum IV ABCC2 (MRP2) (Relative values)	0.6
						MPMLA - Forearm Outer (dorsal)		Ileum IV ABCC3 (MRP3) (Relative values)	1.6
						Skin surface pH : Female	5.2	Ileum IV ABCC4 (MRP4) (Relative values)	1.2
						Skin surface pH CV (%) : Female	8.1	Ileum IV ABCG2 (BCRP) (Relative values)	0.78
						Skin temperature °C : Female	32	Ileum IV SLC2A2 (GLUT2) (Relative values)	1
						Skin temperature CV (%) : Female	0	Ileum IV SLC10A2 (ASBT/IBAT) (Relative values)	108
						Shape of corneocyte : Male	Cuboid (brick)	Ileum IV SLC15A1 (PEPT1) (Relative values)	1.24
						Shape of corneocyte : Female	Cuboid (brick)	Ileum IV SLC16A1 (MCT1) (Relative values)	1.29
						Number of SC layers : Female	22	Ileum IV SLCO2B1 (OATP2B1) (Relative values)	1.28
						Number of SC layers CV (%) : Female	20	Ileum IV SLCO4C1 (OATP4C1) (Relative values)	1
						Water density gm/cm3 : Female	1	Ileum IV SLC22A1 (OCT1) (Relative values)	1.3
						Water density CV (%) : Female	0	Ileum IV SLC22A3 (OCT3) (Relative values)	1.23
						SC lipids density gm/cm3 : Female	0.9	Ileum IV SLC22A4 (OCTN1) (Relative values)	0.8
						SC lipids density CV (%) : Female	0	Ileum IV SLC51A/B (OST-α/β) (Relative values)	0.93
						SC proteins density gm/cm3 : Female	1.37	Ileum IV Apical Influx (Intestine) (Relative values)	1
						SC proteins density CV (%) : Female	0	Ileum IV Apical Efflux (Intestine) (Relative values)	1
						Intercellular lipid thickness of SC µm : Female	0.091	Ileum IV Basolateral Influx (Intestine) (Relative values)	1
						Intercellular lipid thickness of SC CV (%) : Female	0	Ileum IV Basolateral Efflux (Intestine) (Relative values)	1
						Tortuosity : Female	User Defined	Colon pH High Fat Fed	6.33
						Tortuosity of lipid diffusion pathway of SC : Female	12.7	Colon CV pH High Fat Fed (%)	11.78
						Tortuosity of lipid diffusion pathway of SC CV (%) : Female	18	Colon pH Fed	6.5
						Hair follicle diameter µm : Female	77.7	Colon CV pH Fed (%)	15
						Hair follicle diameter CV (%) : Female	32	Colon pH Low Fat Fed	6.33
						Hair follicle density N/cm2 : Female	18	Colon CV pH Low Fat Fed (%)	11.78
						Hair follicle density CV (%) : Female	39	Colon pH Fasted	6.5
						Hair follicle depth µm : Female	109.5	Colon CV pH Fasted (%)	15
						Hair follicle depth CV (%) : Female	0	Colon Bicarbonate Buffer Concentration Fasted (mM)	90.87
						Hair shaft diameter µm : Female	18	Colon Bicarbonate Buffer Concentration CV Fasted (%)	30
						Hair shaft diameter CV (%) : Female	34	Colon Bicarbonate Buffer Concentration Fed (mM)	44.43
						Sebum viscosity centipose : Female	40	Colon Bicarbonate Buffer Concentration CV Fed (%)	30
						Sebum viscosity CV (%) : Female	0	Colon Luminal Fluid Velocity Fasted (m/s)	0.0013
						Corneocyte pH [top] : Female	6.8	Colon Luminal Fluid Velocity CV Fasted (%)	56
						Corneocyte pH [top] CV (%) : Female	6.8	Colon Luminal Fluid Velocity Fed (m/s)	0.0013
						Corneocyte thickness [top] µm : Female	0.69	Colon Luminal Fluid Velocity CV Fed (%)	56
						Corneocyte thickness [top] CV (%) : Female	22	Colon Endogenous Ion Hydrochloric Mean (mM)	14
						Corneocyte width [top] µm : Female	29.6	Colon Endogenous Ion Hydrochloric CV (%)	13
						Corneocyte width [top] CV (%) : Female	5.9	Colon Endogenous Ion Hydrochloric Min (mM)	7
						Corneocyte length [top] µm : Female	36.4	Colon Endogenous Ion Hydrochloric Max (mM)	20
						Corneocyte length [top] CV (%) : Female	5.7	Colon Endogenous Ion Sodium Mean (mM)	30
						Hydration level (% water volume) [top] : Female	33.9	Colon Endogenous Ion Sodium CV (%)	42
						Hydration level (% water volume) [top] CV (%) : Female	9	Colon Endogenous Ion Sodium Min (mM)	6
						SC lipid viscosity [top] centipose : Female	75	Colon Endogenous Ion Sodium Max (mM)	93
						SC lipid viscosity [top] CV (%) : Female	0	Colon Endogenous Ion Potassium Mean (mM)	77
						Corneocyte pH [upper mid] : Female	6.8	Colon Endogenous Ion Potassium CV (%)	11
						Corneocyte pH [upper mid] CV (%) : Female	6.8	Colon Endogenous Ion Potassium Min (mM)	40
						Corneocyte thickness [upper mid] µm : Female	0.79	Colon Endogenous Ion Potassium Max (mM)	108
						Corneocyte thickness [upper mid] CV (%) : Female	22	Colon Endogenous Ion Calcium Mean (mM)	20
						Corneocyte width [upper mid] µm : Female	29.6	Colon Endogenous Ion Calcium CV (%)	34
						Corneocyte width [upper mid] CV (%) : Female	5.9	Colon Endogenous Ion Calcium Min (mM)	7
						Corneocyte length [upper mid] µm : Female	36.4	Colon Endogenous Ion Calcium Max (mM)	85
						Corneocyte length [upper mid] CV (%) : Female	5.7	Colon Endogenous Ion Generic Cation Mean (mM)	1
						Hydration level (% water volume) [upper mid] : Female	44.6987	Colon Endogenous Ion Generic Cation CV (%)	0
						Hydration level (% water volume) [upper mid] CV (%) : Female	6	Colon Endogenous Ion Generic Cation Min (mM)	0.01
						SC lipid viscosity [upper mid] centipose : Female	75	Colon Endogenous Ion Generic Cation Max (mM)	1000
						SC lipid viscosity [upper mid] CV (%) : Female	0	Colon Endogenous Ion Generic Anion Mean (mM)	1
						Corneocyte pH [lower mid] : Female	6.8	Colon Endogenous Ion Generic Anion CV (%)	0
						Corneocyte pH [lower mid] CV (%) : Female	6.8	Colon Endogenous Ion Generic Anion Min (mM)	0.01
						Corneocyte thickness [lower mid] µm : Female	0.89	Colon Endogenous Ion Generic Anion Max (mM)	1000
						Corneocyte thickness [lower mid] CV (%) : Female	22	Colon Fluid Viscosity Fasted (cP)	3
						Corneocyte width [lower mid] µm : Female	29.6	Colon Fluid Viscosity CV Fasted (%)	71
						Corneocyte width [lower mid] CV (%) : Female	5.9	Colon Fluid Viscosity Fed (cP)	3
						Corneocyte length [lower mid] µm : Female	36.4	Colon Fluid Viscosity CV Fed (%)	71
						Corneocyte length [lower mid] CV (%) : Female	5.7	Colon CMC fasted (mM)	1
						Hydration level (% water volume) [lower mid] : Female	55.5388	Colon CMC fed (mM)	1
						Hydration level (% water volume) [lower mid] CV (%) : Female	5	Colon Bile fasted (mM)	0.6
						SC lipid viscosity [lower mid] centipose : Female	75	Colon Bile fasted CV (%)	50
						SC lipid viscosity [lower mid] CV (%) : Female	0	Colon Bile fed (mM)	0.6
						Corneocyte pH [bottom] : Female	6.8	Colon Bile fed CV (%)	50
						Corneocyte pH [bottom] CV (%) : Female	6.8	Colon Fold Expansion Mean	1
						Corneocyte thickness [bottom] µm : Female	1	Colon Fold Expansion CV (%)	0
						Corneocyte thickness [bottom] CV (%) : Female	22	Colon Pore Radius Mean	8.6
						Corneocyte width [bottom] µm : Female	29.6	Colon Pore Radius CV (%)	0
						Corneocyte width [bottom] CV (%) : Female	5.9	Colon Unstirred Layer Thickness Mean (µm)	830
						Corneocyte length [bottom] µm : Female	36.4	Colon Unstirred Layer Thickness CV (%)	13
						Corneocyte length [bottom] CV (%) : Female	5.7	Colon Unstirred Layer pH	6.5
						Hydration level (% water volume) [bottom] : Female	66.4	Colon Unstirred Layer CV (%)	0.5
						Hydration level (% water volume) [bottom] CV (%) : Female	4	Colon ABCB1 (P-gp/MDR1) (Relative values)	0.57
						SC lipid viscosity [bottom] centipose : Female	75	Colon ABCC1 (MRP1) (Relative values)	0.93
						SC lipid viscosity [bottom] CV (%) : Female	0	Colon ABCC2 (MRP2) (Relative values)	0.02
						Viable Epidermis thickness µm : Female	53.5684	Colon ABCC3 (MRP3) (Relative values)	5.95
						Viable Epidermis thickness CV (%) : Female	21	Colon ABCC4 (MRP4) (Relative values)	1.76
						Dermis thickness µm : Female	1240	Colon ABCG2 (BCRP) (Relative values)	0.57
						Dermis thickness CV (%) : Female	20	Colon SLC2A2 (GLUT2) (Relative values)	1
						Subcutis thickness mm : Female	1.91	Colon SLC10A2 (ASBT/IBAT) (Relative values)	1.1
						Subcutis thickness CV (%) : Female	55.7	Colon SLC15A1 (PEPT1) (Relative values)	0.03
						Muscle thickness mm : Female	23.81	Colon SLC16A1 (MCT1) (Relative values)	4.72
						Muscle thickness CV (%) : Female	14.85	Colon SLCO2B1 (OATP2B1) (Relative values)	1.06
						Dermis regional blood flow scalar : Female	0.5875	Colon SLCO4C1 (OATP4C1) (Relative values)	1
						Dermis regional blood flow scalar CV (%) : Female	0	Colon SLC22A1 (OCT1) (Relative values)	2.77
						Subcutis regional blood flow scalar : Female	1	Colon SLC22A3 (OCT3) (Relative values)	1.88
						Subcutis regional blood flow scalar CV (%) : Female	0	Colon SLC22A4 (OCTN1) (Relative values)	0.24
						Muscle regional blood flow scalar : Female	1	Colon SLC51A/B (OST-α/β) (Relative values)	0.71
						Muscle regional blood flow scalar CV (%) : Female	0	Colon Apical Influx (Intestine) (Relative values)	1
								Colon Apical Efflux (Intestine) (Relative values)	1
						MPMLA - Upper Arm		Colon Basolateral Influx (Intestine) (Relative values)	1
						Skin surface pH : Female	5.5	Colon Basolateral Efflux (Intestine) (Relative values)	1
						Skin surface pH CV (%) : Female	11.1	Luminal Fluid Density (mg/mL)	993.32
						Skin temperature °C : Female	32	Abundance : ABCB1 (P-gp/MDR1) ET Mean	1
						Skin temperature CV (%) : Female	0	Abundance : ABCB1 (P-gp/MDR1) ET CV (%)	65
						Shape of corneocyte : Male	Cuboid (brick)	Abundance : ABCB1 (P-gp/MDR1) PT Mean	0
						Shape of corneocyte : Female	Cuboid (brick)	Abundance : ABCB1 (P-gp/MDR1) PT CV (%)	0
						Number of SC layers : Female	18	Abundance : ABCB1 (P-gp/MDR1) IT Mean	0
						Number of SC layers CV (%) : Female	22	Abundance : ABCB1 (P-gp/MDR1) IT CV (%)	0
						Water density gm/cm3 : Female	1	Abundance : ABCB1 (P-gp/MDR1) UT Mean	0
						Water density CV (%) : Female	0	Abundance : ABCB1 (P-gp/MDR1) UT CV (%)	0
						SC lipids density gm/cm3 : Female	0.9	Abundance : ABCC1 (MRP1) ET Mean	1
						SC lipids density CV (%) : Female	0	Abundance : ABCC1 (MRP1) ET CV (%)	88
						SC proteins density gm/cm3 : Female	1.37	Abundance : ABCC1 (MRP1) PT Mean	0
						SC proteins density CV (%) : Female	0	Abundance : ABCC1 (MRP1) PT CV (%)	0
						Intercellular lipid thickness of SC µm : Female	0.091	Abundance : ABCC1 (MRP1) IT Mean	0
						Intercellular lipid thickness of SC CV (%) : Female	0	Abundance : ABCC1 (MRP1) IT CV (%)	0
						Tortuosity : Female	User Defined	Abundance : ABCC1 (MRP1) UT Mean	0
						Tortuosity of lipid diffusion pathway of SC : Female	12.7	Abundance : ABCC1 (MRP1) UT CV (%)	0
						Tortuosity of lipid diffusion pathway of SC CV (%) : Female	18	Abundance : ABCC2 (MRP2) ET Mean	1
						Hair follicle diameter µm : Female	88.8	Abundance : ABCC2 (MRP2) ET CV (%)	79
						Hair follicle diameter CV (%) : Female	33	Abundance : ABCC2 (MRP2) PT Mean	0
						Hair follicle density N/cm2 : Female	32	Abundance : ABCC2 (MRP2) PT CV (%)	0
						Hair follicle density CV (%) : Female	28	Abundance : ABCC2 (MRP2) IT Mean	0
						Hair follicle depth µm : Female	256.7	Abundance : ABCC2 (MRP2) IT CV (%)	0
						Hair follicle depth CV (%) : Female	0	Abundance : ABCC2 (MRP2) UT Mean	0
						Hair shaft diameter µm : Female	16.8	Abundance : ABCC2 (MRP2) UT CV (%)	0
						Hair shaft diameter CV (%) : Female	37	Abundance : ABCC3 (MRP3) ET Mean	1
						Sebum viscosity centipose : Female	40	Abundance : ABCC3 (MRP3) ET CV (%)	64
						Sebum viscosity CV (%) : Female	0	Abundance : ABCC3 (MRP3) PT Mean	0
						Corneocyte pH [top] : Female	6.8	Abundance : ABCC3 (MRP3) PT CV (%)	0
						Corneocyte pH [top] CV (%) : Female	6.8	Abundance : ABCC3 (MRP3) IT Mean	0
						Corneocyte thickness [top] µm : Female	0.71	Abundance : ABCC3 (MRP3) IT CV (%)	0
						Corneocyte thickness [top] CV (%) : Female	11	Abundance : ABCC3 (MRP3) UT Mean	0
						Corneocyte width [top] µm : Female	33.2	Abundance : ABCC3 (MRP3) UT CV (%)	0
						Corneocyte width [top] CV (%) : Female	10.4	Abundance : ABCC4 (MRP4) ET Mean	1
						Corneocyte length [top] µm : Female	40.4	Abundance : ABCC4 (MRP4) ET CV (%)	106
						Corneocyte length [top] CV (%) : Female	6.8	Abundance : ABCC4 (MRP4) PT Mean	0
						Hydration level (% water volume) [top] : Female	33.6	Abundance : ABCC4 (MRP4) PT CV (%)	0
						Hydration level (% water volume) [top] CV (%) : Female	11	Abundance : ABCC4 (MRP4) IT Mean	0
						SC lipid viscosity [top] centipose : Female	75	Abundance : ABCC4 (MRP4) IT CV (%)	0
						SC lipid viscosity [top] CV (%) : Female	0	Abundance : ABCC4 (MRP4) UT Mean	0
						Corneocyte pH [upper mid] : Female	6.8	Abundance : ABCC4 (MRP4) UT CV (%)	0
						Corneocyte pH [upper mid] CV (%) : Female	6.8	Abundance : ABCG2 (BCRP) ET Mean	1
						Corneocyte thickness [upper mid] µm : Female	0.81	Abundance : ABCG2 (BCRP) ET CV (%)	63
						Corneocyte thickness [upper mid] CV (%) : Female	11	Abundance : ABCG2 (BCRP) PT Mean	0.37
						Corneocyte width [upper mid] µm : Female	33.2	Abundance : ABCG2 (BCRP) PT CV (%)	63
						Corneocyte width [upper mid] CV (%) : Female	10.4	Abundance : ABCG2 (BCRP) IT Mean	0.67
						Corneocyte length [upper mid] µm : Female	40.4	Abundance : ABCG2 (BCRP) IT CV (%)	63
						Corneocyte length [upper mid] CV (%) : Female	6.8	Abundance : ABCG2 (BCRP) UT Mean	0
						Hydration level (% water volume) [upper mid] : Female	44.858	Abundance : ABCG2 (BCRP) UT CV (%)	0
						Hydration level (% water volume) [upper mid] CV (%) : Female	7	Abundance : SLC2A2 (GLUT2) ET Mean	1
						SC lipid viscosity [upper mid] centipose : Female	75	Abundance : SLC2A2 (GLUT2) ET CV (%)	31
						SC lipid viscosity [upper mid] CV (%) : Female	0	Abundance : SLC2A2 (GLUT2) PT Mean	0
						Corneocyte pH [lower mid] : Female	6.8	Abundance : SLC2A2 (GLUT2) PT CV (%)	0
						Corneocyte pH [lower mid] CV (%) : Female	6.8	Abundance : SLC2A2 (GLUT2) IT Mean	0
						Corneocyte thickness [lower mid] µm : Female	0.93	Abundance : SLC2A2 (GLUT2) IT CV (%)	0
						Corneocyte thickness [lower mid] CV (%) : Female	11	Abundance : SLC2A2 (GLUT2) UT Mean	0
						Corneocyte width [lower mid] µm : Female	33.2	Abundance : SLC2A2 (GLUT2) UT CV (%)	0
						Corneocyte width [lower mid] CV (%) : Female	10.4	Abundance : SLC10A2 (ASBT/IBAT) ET Mean	1
						Corneocyte length [lower mid] µm : Female	40.4	Abundance : SLC10A2 (ASBT/IBAT) ET CV (%)	43
						Corneocyte length [lower mid] CV (%) : Female	6.8	Abundance : SLC10A2 (ASBT/IBAT) PT Mean	0
						Hydration level (% water volume) [lower mid] : Female	56.0703	Abundance : SLC10A2 (ASBT/IBAT) PT CV (%)	0
						Hydration level (% water volume) [lower mid] CV (%) : Female	5	Abundance : SLC10A2 (ASBT/IBAT) IT Mean	0
						SC lipid viscosity [lower mid] centipose : Female	75	Abundance : SLC10A2 (ASBT/IBAT) IT CV (%)	0
						SC lipid viscosity [lower mid] CV (%) : Female	0	Abundance : SLC10A2 (ASBT/IBAT) UT Mean	0
						Corneocyte pH [bottom] : Female	6.8	Abundance : SLC10A2 (ASBT/IBAT) UT CV (%)	0
						Corneocyte pH [bottom] CV (%) : Female	6.8	Abundance : SLC15A1 (PEPT1) ET Mean	1
						Corneocyte thickness [bottom] µm : Female	1.04	Abundance : SLC15A1 (PEPT1) ET CV (%)	41
						Corneocyte thickness [bottom] CV (%) : Female	11	Abundance : SLC15A1 (PEPT1) PT Mean	0
						Corneocyte width [bottom] µm : Female	33.2	Abundance : SLC15A1 (PEPT1) PT CV (%)	0
						Corneocyte width [bottom] CV (%) : Female	10.4	Abundance : SLC15A1 (PEPT1) IT Mean	0
						Corneocyte length [bottom] µm : Female	40.4	Abundance : SLC15A1 (PEPT1) IT CV (%)	0
						Corneocyte length [bottom] CV (%) : Female	6.8	Abundance : SLC15A1 (PEPT1) UT Mean	0
						Hydration level (% water volume) [bottom] : Female	67.3	Abundance : SLC15A1 (PEPT1) UT CV (%)	0
						Hydration level (% water volume) [bottom] CV (%) : Female	4	Abundance : SLC16A1 (MCT1) ET Mean	1
						SC lipid viscosity [bottom] centipose : Female	75	Abundance : SLC16A1 (MCT1) ET CV (%)	75
						SC lipid viscosity [bottom] CV (%) : Female	0	Abundance : SLC16A1 (MCT1) PT Mean	0
						Viable Epidermis thickness µm : Female	51.8	Abundance : SLC16A1 (MCT1) PT CV (%)	0
						Viable Epidermis thickness CV (%) : Female	15	Abundance : SLC16A1 (MCT1) IT Mean	0
						Dermis thickness µm : Female	1540	Abundance : SLC16A1 (MCT1) IT CV (%)	0
						Dermis thickness CV (%) : Female	29	Abundance : SLC16A1 (MCT1) UT Mean	0
						Subcutis thickness mm : Female	9.64	Abundance : SLC16A1 (MCT1) UT CV (%)	0
						Subcutis thickness CV (%) : Female	56.2	Abundance : SLCO2B1 (OATP2B1) ET Mean	1
						Muscle thickness mm : Female	22.79	Abundance : SLCO2B1 (OATP2B1) ET CV (%)	74
						Muscle thickness CV (%) : Female	28.92	Abundance : SLCO2B1 (OATP2B1) PT Mean	0
						Dermis regional blood flow scalar : Female	1.2869	Abundance : SLCO2B1 (OATP2B1) PT CV (%)	0
						Dermis regional blood flow scalar CV (%) : Female	0	Abundance : SLCO2B1 (OATP2B1) IT Mean	0
						Subcutis regional blood flow scalar : Female	1	Abundance : SLCO2B1 (OATP2B1) IT CV (%)	0
						Subcutis regional blood flow scalar CV (%) : Female	0	Abundance : SLCO2B1 (OATP2B1) UT Mean	0
						Muscle regional blood flow scalar : Female	1	Abundance : SLCO2B1 (OATP2B1) UT CV (%)	0
						Muscle regional blood flow scalar CV (%) : Female	0	Abundance : SLCO4C1 (OATP4C1) ET Mean	1
								Abundance : SLCO4C1 (OATP4C1) ET CV (%)	60
						MPMLA - Face (cheek)		Abundance : SLCO4C1 (OATP4C1) PT Mean	0
						Skin surface pH : Female	5.3	Abundance : SLCO4C1 (OATP4C1) PT CV (%)	0
						Skin surface pH CV (%) : Female	7.4	Abundance : SLCO4C1 (OATP4C1) IT Mean	0
						Skin temperature °C : Female	32	Abundance : SLCO4C1 (OATP4C1) IT CV (%)	0
						Skin temperature CV (%) : Female	0	Abundance : SLCO4C1 (OATP4C1) UT Mean	0
						Shape of corneocyte : Male	Cuboid (brick)	Abundance : SLCO4C1 (OATP4C1) UT CV (%)	0
						Shape of corneocyte : Female	Cuboid (brick)	Abundance : SLC22A1 (OCT1) ET Mean	1
						Number of SC layers : Female	13	Abundance : SLC22A1 (OCT1) ET CV (%)	49
						Number of SC layers CV (%) : Female	23	Abundance : SLC22A1 (OCT1) PT Mean	0.01
						Water density gm/cm3 : Female	1	Abundance : SLC22A1 (OCT1) PT CV (%)	49
						Water density CV (%) : Female	0	Abundance : SLC22A1 (OCT1) IT Mean	0.62
						SC lipids density gm/cm3 : Female	0.9	Abundance : SLC22A1 (OCT1) IT CV (%)	49
						SC lipids density CV (%) : Female	0	Abundance : SLC22A1 (OCT1) UT Mean	1.14
						SC proteins density gm/cm3 : Female	1.37	Abundance : SLC22A1 (OCT1) UT CV (%)	49
						SC proteins density CV (%) : Female	0	Abundance : SLC22A3 (OCT3) ET Mean	1
						Intercellular lipid thickness of SC µm : Female	0.091	Abundance : SLC22A3 (OCT3) ET CV (%)	74
						Intercellular lipid thickness of SC CV (%) : Female	0	Abundance : SLC22A3 (OCT3) PT Mean	0
						Tortuosity : Female	User Defined	Abundance : SLC22A3 (OCT3) PT CV (%)	0
						Tortuosity of lipid diffusion pathway of SC : Female	12.7	Abundance : SLC22A3 (OCT3) IT Mean	0
						Tortuosity of lipid diffusion pathway of SC CV (%) : Female	18	Abundance : SLC22A3 (OCT3) IT CV (%)	0
						Hair follicle diameter µm : Female	65.4	Abundance : SLC22A3 (OCT3) UT Mean	0
						Hair follicle diameter CV (%) : Female	83	Abundance : SLC22A3 (OCT3) UT CV (%)	0
						Hair follicle density N/cm2 : Female	292	Abundance : SLC22A4 (OCTN1) ET Mean	1
						Hair follicle density CV (%) : Female	16	Abundance : SLC22A4 (OCTN1) ET CV (%)	106
						Hair follicle depth µm : Female	204.8	Abundance : SLC22A4 (OCTN1) PT Mean	0
						Hair follicle depth CV (%) : Female	0	Abundance : SLC22A4 (OCTN1) PT CV (%)	0
						Hair shaft diameter µm : Female	15.9	Abundance : SLC22A4 (OCTN1) IT Mean	0
						Hair shaft diameter CV (%) : Female	57	Abundance : SLC22A4 (OCTN1) IT CV (%)	0
						Sebum viscosity centipose : Female	40	Abundance : SLC22A4 (OCTN1) UT Mean	0
						Sebum viscosity CV (%) : Female	0	Abundance : SLC22A4 (OCTN1) UT CV (%)	0
						Corneocyte pH [top] : Female	6.8	Abundance : SLC51A/B (OST-α/β) ET Mean	1
						Corneocyte pH [top] CV (%) : Female	6.8	Abundance : SLC51A/B (OST-α/β) ET CV (%)	99
						Corneocyte thickness [top] µm : Female	0.47	Abundance : SLC51A/B (OST-α/β) PT Mean	0
						Corneocyte thickness [top] CV (%) : Female	4	Abundance : SLC51A/B (OST-α/β) PT CV (%)	0
						Corneocyte width [top] µm : Female	27.7	Abundance : SLC51A/B (OST-α/β) IT Mean	0
						Corneocyte width [top] CV (%) : Female	9.2	Abundance : SLC51A/B (OST-α/β) IT CV (%)	0
						Corneocyte length [top] µm : Female	34.2	Abundance : SLC51A/B (OST-α/β) UT Mean	0
						Corneocyte length [top] CV (%) : Female	4.1	Abundance : SLC51A/B (OST-α/β) UT CV (%)	0
						Hydration level (% water volume) [top] : Female	35.5	Abundance : Apical Influx (Intestine) ET Mean	1
						Hydration level (% water volume) [top] CV (%) : Female	17	Abundance : Apical Influx (Intestine) ET CV (%)	0
						SC lipid viscosity [top] centipose : Female	75	Abundance : Apical Influx (Intestine) PT Mean	0
						SC lipid viscosity [top] CV (%) : Female	0	Abundance : Apical Influx (Intestine) PT CV (%)	0
						Corneocyte pH [upper mid] : Female	6.8	Abundance : Apical Influx (Intestine) IT Mean	0
						Corneocyte pH [upper mid] CV (%) : Female	6.8	Abundance : Apical Influx (Intestine) IT CV (%)	0
						Corneocyte thickness [upper mid] µm : Female	0.53	Abundance : Apical Influx (Intestine) UT Mean	0
						Corneocyte thickness [upper mid] CV (%) : Female	4	Abundance : Apical Influx (Intestine) UT CV (%)	0
						Corneocyte width [upper mid] µm : Female	27.7	Abundance : Apical Efflux (Intestine) ET Mean	1
						Corneocyte width [upper mid] CV (%) : Female	9.2	Abundance : Apical Efflux (Intestine) ET CV (%)	0
						Corneocyte length [upper mid] µm : Female	34.2	Abundance : Apical Efflux (Intestine) PT Mean	0
						Corneocyte length [upper mid] CV (%) : Female	4.1	Abundance : Apical Efflux (Intestine) PT CV (%)	0
						Hydration level (% water volume) [upper mid] : Female	46.1	Abundance : Apical Efflux (Intestine) IT Mean	0
						Hydration level (% water volume) [upper mid] CV (%) : Female	11	Abundance : Apical Efflux (Intestine) IT CV (%)	0
						SC lipid viscosity [upper mid] centipose : Female	75	Abundance : Apical Efflux (Intestine) UT Mean	0
						SC lipid viscosity [upper mid] CV (%) : Female	0	Abundance : Apical Efflux (Intestine) UT CV (%)	0
						Corneocyte pH [lower mid] : Female	6.8	Abundance : Basolateral Influx (Intestine) ET Mean	1
						Corneocyte pH [lower mid] CV (%) : Female	6.8	Abundance : Basolateral Influx (Intestine) ET CV (%)	0
						Corneocyte thickness [lower mid] µm : Female	0.6	Abundance : Basolateral Influx (Intestine) PT Mean	0
						Corneocyte thickness [lower mid] CV (%) : Female	4	Abundance : Basolateral Influx (Intestine) PT CV (%)	0
						Corneocyte width [lower mid] µm : Female	27.7	Abundance : Basolateral Influx (Intestine) IT Mean	0
						Corneocyte width [lower mid] CV (%) : Female	9.2	Abundance : Basolateral Influx (Intestine) IT CV (%)	0
						Corneocyte length [lower mid] µm : Female	34.2	Abundance : Basolateral Influx (Intestine) UT Mean	0
						Corneocyte length [lower mid] CV (%) : Female	4.1	Abundance : Basolateral Influx (Intestine) UT CV (%)	0
						Hydration level (% water volume) [lower mid] : Female	56.75	Abundance : Basolateral Efflux (Intestine) ET Mean	1
						Hydration level (% water volume) [lower mid] CV (%) : Female	7	Abundance : Basolateral Efflux (Intestine) ET CV (%)	0
						SC lipid viscosity [lower mid] centipose : Female	75	Abundance : Basolateral Efflux (Intestine) PT Mean	0
						SC lipid viscosity [lower mid] CV (%) : Female	0	Abundance : Basolateral Efflux (Intestine) PT CV (%)	0
						Corneocyte pH [bottom] : Female	6.8	Abundance : Basolateral Efflux (Intestine) IT Mean	0
						Corneocyte pH [bottom] CV (%) : Female	6.8	Abundance : Basolateral Efflux (Intestine) IT CV (%)	0
						Corneocyte thickness [bottom] µm : Female	0.68	Abundance : Basolateral Efflux (Intestine) UT Mean	0
						Corneocyte thickness [bottom] CV (%) : Female	4	Abundance : Basolateral Efflux (Intestine) UT CV (%)	0
						Corneocyte width [bottom] µm : Female	27.7	Fasted Mean gastric emptying time (h)	0.75
						Corneocyte width [bottom] CV (%) : Female	9.2	Fasted CV gastric emptying time (%)	50
						Corneocyte length [bottom] µm : Female	34.2	Fed Liquid Mean gastric emptying time (h)	1.18
						Corneocyte length [bottom] CV (%) : Female	4.1	Fed Liquid CV gastric emptying time (%)	62
						Hydration level (% water volume) [bottom] : Female	67.4	Weibull Dist of transit time - alpha	2.92
						Hydration level (% water volume) [bottom] CV (%) : Female	4	Weibull Dist of transit time - beta	4.04
						SC lipid viscosity [bottom] centipose : Female	75	Mean colon transit time (h)	12
						SC lipid viscosity [bottom] CV (%) : Female	0	CV colon transit time (%)	30
						Viable Epidermis thickness µm : Female	46.8667	Initial volume of stomach fluid (mL/kg) - Fed [0 - 6 Months]	25
						Viable Epidermis thickness CV (%) : Female	24	Initial volume of stomach fluid (mL/kg) - Fed [6 Months - 6 Years]	20
						Dermis thickness µm : Female	1580	Initial volume of stomach fluid (mL/kg) - Fed [6 Years +]	15
						Dermis thickness CV (%) : Female	20	Initial volume of stomach fluid CV (%) - Fed	30
						Subcutis thickness mm : Female	1.91	Initial volume of stomach fluid (mL/kg) - Fasted	0.68
						Subcutis thickness CV (%) : Female	55.7	Initial volume of stomach fluid CV (%) - Fasted	30
						Muscle thickness mm : Female	12.6	Mean SITT (h)	3.33873
						Muscle thickness CV (%) : Female	9.9	Ionic Product (Kw) (10-14 mol2/dm6)	2.4
						Dermis regional blood flow scalar : Female	2.12619	Aqueous Diffusion Coefficients H+ (10-4 cm2/min)	6.94
						Dermis regional blood flow scalar CV (%) : Female	0	Aqueous Diffusion Coefficients OH- (10-4 cm2/min)	7.2
						Subcutis regional blood flow scalar : Female	1	Water Concentration (mM)	55560
						Subcutis regional blood flow scalar CV (%) : Female	0	Bicarbonate pKa Type	Effective
						Muscle regional blood flow scalar : Female	1	Bicarbonate pKa 1	4.2
						Muscle regional blood flow scalar CV (%) : Female	0	Bicarbonate pKa 2	9.79
								Aqueous Diffusion Coefficients 37oC (10-4 cm2/min) H2CO3	17.72
						MPMLA - Lower Leg		Aqueous Diffusion Coefficients 37oC (10-4 cm2/min) HCO3-	9.85
						Skin surface pH : Female	5.5	Aqueous Diffusion Coefficients 37oC (10-4 cm2/min) CO32-	6.98
						Skin surface pH CV (%) : Female	11	Advanced Fluid Volume Dynamics Model	No
						Skin temperature °C : Female	32	User Defined Intestinal Fluid Volumes?	No
						Skin temperature CV (%) : Female	0	Fasted Jejunum I basal fluid volume (mL)	21.1
						Shape of corneocyte : Male	Cuboid (brick)	Fasted Jejunum II basal fluid volume (mL)	21.1
						Shape of corneocyte : Female	Cuboid (brick)	Fasted Ileum I basal fluid volume (mL)	12.6
						Number of SC layers : Female	22	Fasted Ileum II basal fluid volume (mL)	12.6
						Number of SC layers CV (%) : Female	6	Fasted Ileum III basal fluid volume (mL)	12.6
						Water density gm/cm3 : Female	1	Fasted Ileum IV basal fluid volume (mL)	12.6
						Water density CV (%) : Female	0	Fasted Jejunum I-Ileum IV basal fluid volume %CV (%)	37
						SC lipids density gm/cm3 : Female	0.9	Fasted Colon basal fluid volume (mL)	13
						SC lipids density CV (%) : Female	0	Fasted Colon basal fluid volume %CV (%)	4.4
						SC proteins density gm/cm3 : Female	1.37	Fed Jejunum I basal fluid volume (mL)	21.1
						SC proteins density CV (%) : Female	0	Fed Jejunum II basal fluid volume (mL)	21.1
						Intercellular lipid thickness of SC µm : Female	0.091	Fed Ileum I basal fluid volume (mL)	12.6
						Intercellular lipid thickness of SC CV (%) : Female	0	Fed Ileum II basal fluid volume (mL)	12.6
						Tortuosity : Female	User Defined	Fed Ileum III basal fluid volume (mL)	12.6
						Tortuosity of lipid diffusion pathway of SC : Female	12.7	Fed Ileum IV basal fluid volume (mL)	12.6
						Tortuosity of lipid diffusion pathway of SC CV (%) : Female	18	Fed Jejunum I-Ileum IV basal fluid volume %CV (%)	37
						Hair follicle diameter µm : Female	168.4	Fed Colon basal fluid volume (mL)	13
						Hair follicle diameter CV (%) : Female	26	Fed Colon basal fluid volume %CV (%)	4.4
						Hair follicle density N/cm2 : Female	14	Fasted stomach Total Content mean (g)	50
						Hair follicle density CV (%) : Female	50	Fasted stomach Total Content CV (%)	30
						Hair follicle depth µm : Female	613.5	Fed stomach Total Content mean (g)	1000
						Hair follicle depth CV (%) : Female	0	Fed stomach Total Content CV (%)	30
						Hair shaft diameter µm : Female	42.1	Fasted duodenum Total Content mean (g)	34
						Hair shaft diameter CV (%) : Female	29	Fasted duodenum Total Content CV (%)	30
						Sebum viscosity centipose : Female	40	Fed duodenum Total Content mean (g)	34
						Sebum viscosity CV (%) : Female	0	Fed duodenum Total Content CV (%)	30
						Corneocyte pH [top] : Female	6.8	Fasted jejunum I Total Content mean (g)	23
						Corneocyte pH [top] CV (%) : Female	6.8	Fasted jejunum I Total Content CV (%)	30
						Corneocyte thickness [top] µm : Female	0.87	Fed jejunum I Total Content mean (g)	23
						Corneocyte thickness [top] CV (%) : Female	9	Fed jejunum I Total Content CV (%)	30
						Corneocyte width [top] µm : Female	29.6	Fasted jejunum II Total Content mean (g)	23
						Corneocyte width [top] CV (%) : Female	5.9	Fasted jejunum II Total Content CV (%)	30
						Corneocyte length [top] µm : Female	36.4	Fed jejunum II Total Content mean (g)	23
						Corneocyte length [top] CV (%) : Female	5.7	Fed jejunum II Total Content CV (%)	30
						Hydration level (% water volume) [top] : Female	33.9	Fasted ileum I Total Content mean (g)	14
						Hydration level (% water volume) [top] CV (%) : Female	9	Fasted ileum I Total Content CV (%)	30
						SC lipid viscosity [top] centipose : Female	75	Fed ileum I Total Content mean (g)	14
						SC lipid viscosity [top] CV (%) : Female	0	Fed ileum I Total Content CV (%)	30
						Corneocyte pH [upper mid] : Female	6.8	Fasted ileum II Total Content mean (g)	14
						Corneocyte pH [upper mid] CV (%) : Female	6.8	Fasted ileum II Total Content CV (%)	30
						Corneocyte thickness [upper mid] µm : Female	0.99	Fed ileum II Total Content mean (g)	14
						Corneocyte thickness [upper mid] CV (%) : Female	9	Fed ileum II Total Content CV (%)	30
						Corneocyte width [upper mid] µm : Female	29.6	Fasted ileum III Total Content mean (g)	14
						Corneocyte width [upper mid] CV (%) : Female	5.9	Fasted ileum III Total Content CV (%)	30
						Corneocyte length [upper mid] µm : Female	36.4	Fed ileum III Total Content mean (g)	14
						Corneocyte length [upper mid] CV (%) : Female	5.7	Fed ileum III Total Content CV (%)	30
						Hydration level (% water volume) [upper mid] : Female	44.6987	Fasted ileum IV Total Content mean (g)	14
						Hydration level (% water volume) [upper mid] CV (%) : Female	6	Fasted ileum IV Total Content CV (%)	30
						SC lipid viscosity [upper mid] centipose : Female	75	Fed ileum IV Total Content mean (g)	14
						SC lipid viscosity [upper mid] CV (%) : Female	0	Fed ileum IV Total Content CV (%)	30
						Corneocyte pH [lower mid] : Female	6.8	Fasted colon Total Content mean (g)	133.29
						Corneocyte pH [lower mid] CV (%) : Female	6.8	Fasted colon Total Content CV (%)	62.2
						Corneocyte thickness [lower mid] µm : Female	1.13	Fed colon Total Content mean (g)	133.29
						Corneocyte thickness [lower mid] CV (%) : Female	9	Fed colon Total Content CV (%)	62.2
						Corneocyte width [lower mid] µm : Female	29.6
						Corneocyte width [lower mid] CV (%) : Female	5.9
						Corneocyte length [lower mid] µm : Female	36.4
						Corneocyte length [lower mid] CV (%) : Female	5.7
						Hydration level (% water volume) [lower mid] : Female	55.5388
						Hydration level (% water volume) [lower mid] CV (%) : Female	5
						SC lipid viscosity [lower mid] centipose : Female	75
						SC lipid viscosity [lower mid] CV (%) : Female	0
						Corneocyte pH [bottom] : Female	6.8
						Corneocyte pH [bottom] CV (%) : Female	6.8
						Corneocyte thickness [bottom] µm : Female	1.27
						Corneocyte thickness [bottom] CV (%) : Female	9
						Corneocyte width [bottom] µm : Female	29.6
						Corneocyte width [bottom] CV (%) : Female	5.9
						Corneocyte length [bottom] µm : Female	36.4
						Corneocyte length [bottom] CV (%) : Female	5.7
						Hydration level (% water volume) [bottom] : Female	66.4
						Hydration level (% water volume) [bottom] CV (%) : Female	4
						SC lipid viscosity [bottom] centipose : Female	75
						SC lipid viscosity [bottom] CV (%) : Female	0
						Viable Epidermis thickness µm : Female	57.36
						Viable Epidermis thickness CV (%) : Female	8
						Dermis thickness µm : Female	1240
						Dermis thickness CV (%) : Female	20
						Subcutis thickness mm : Female	17.07
						Subcutis thickness CV (%) : Female	37.1
						Muscle thickness mm : Female	18.84
						Muscle thickness CV (%) : Female	18.63
						Dermis regional blood flow scalar : Female	0.839286
						Dermis regional blood flow scalar CV (%) : Female	0
						Subcutis regional blood flow scalar : Female	1
						Subcutis regional blood flow scalar CV (%) : Female	0
						Muscle regional blood flow scalar : Female	1
						Muscle regional blood flow scalar CV (%) : Female	0
						MPMLA - Thigh
						Skin surface pH : Female	5.5
						Skin surface pH CV (%) : Female	11
						Skin temperature °C : Female	32
						Skin temperature CV (%) : Female	0
						Shape of corneocyte : Male	Cuboid (brick)
						Shape of corneocyte : Female	Cuboid (brick)
						Number of SC layers : Female	19
						Number of SC layers CV (%) : Female	15
						Water density gm/cm3 : Female	1
						Water density CV (%) : Female	0
						SC lipids density gm/cm3 : Female	0.9
						SC lipids density CV (%) : Female	0
						SC proteins density gm/cm3 : Female	1.37
						SC proteins density CV (%) : Female	0
						Intercellular lipid thickness of SC µm : Female	0.091
						Intercellular lipid thickness of SC CV (%) : Female	0
						Tortuosity : Female	User Defined
						Tortuosity of lipid diffusion pathway of SC : Female	12.7
						Tortuosity of lipid diffusion pathway of SC CV (%) : Female	18
						Hair follicle diameter µm : Female	131.5
						Hair follicle diameter CV (%) : Female	31
						Hair follicle density N/cm2 : Female	17
						Hair follicle density CV (%) : Female	24
						Hair follicle depth µm : Female	315.1
						Hair follicle depth CV (%) : Female	0
						Hair shaft diameter µm : Female	29.2
						Hair shaft diameter CV (%) : Female	41
						Sebum viscosity centipose : Female	40
						Sebum viscosity CV (%) : Female	0
						Corneocyte pH [top] : Female	6.8
						Corneocyte pH [top] CV (%) : Female	6.8
						Corneocyte thickness [top] µm : Female	0.87
						Corneocyte thickness [top] CV (%) : Female	26
						Corneocyte width [top] µm : Female	34
						Corneocyte width [top] CV (%) : Female	15.1
						Corneocyte length [top] µm : Female	40.7
						Corneocyte length [top] CV (%) : Female	14.6
						Hydration level (% water volume) [top] : Female	33.9
						Hydration level (% water volume) [top] CV (%) : Female	9
						SC lipid viscosity [top] centipose : Female	75
						SC lipid viscosity [top] CV (%) : Female	0
						Corneocyte pH [upper mid] : Female	6.8
						Corneocyte pH [upper mid] CV (%) : Female	6.8
						Corneocyte thickness [upper mid] µm : Female	0.75
						Corneocyte thickness [upper mid] CV (%) : Female	26
						Corneocyte width [upper mid] µm : Female	34
						Corneocyte width [upper mid] CV (%) : Female	15.1
						Corneocyte length [upper mid] µm : Female	40.7
						Corneocyte length [upper mid] CV (%) : Female	14.6
						Hydration level (% water volume) [upper mid] : Female	44.6987
						Hydration level (% water volume) [upper mid] CV (%) : Female	6
						SC lipid viscosity [upper mid] centipose : Female	75
						SC lipid viscosity [upper mid] CV (%) : Female	0
						Corneocyte pH [lower mid] : Female	6.8
						Corneocyte pH [lower mid] CV (%) : Female	6.8
						Corneocyte thickness [lower mid] µm : Female	0.85
						Corneocyte thickness [lower mid] CV (%) : Female	26
						Corneocyte width [lower mid] µm : Female	34
						Corneocyte width [lower mid] CV (%) : Female	15.1
						Corneocyte length [lower mid] µm : Female	40.7
						Corneocyte length [lower mid] CV (%) : Female	14.6
						Hydration level (% water volume) [lower mid] : Female	55.5388
						Hydration level (% water volume) [lower mid] CV (%) : Female	5
						SC lipid viscosity [lower mid] centipose : Female	75
						SC lipid viscosity [lower mid] CV (%) : Female	0
						Corneocyte pH [bottom] : Female	6.8
						Corneocyte pH [bottom] CV (%) : Female	6.8
						Corneocyte thickness [bottom] µm : Female	0.96
						Corneocyte thickness [bottom] CV (%) : Female	26
						Corneocyte width [bottom] µm : Female	34
						Corneocyte width [bottom] CV (%) : Female	15.1
						Corneocyte length [bottom] µm : Female	40.7
						Corneocyte length [bottom] CV (%) : Female	14.6
						Hydration level (% water volume) [bottom] : Female	66.4
						Hydration level (% water volume) [bottom] CV (%) : Female	4
						SC lipid viscosity [bottom] centipose : Female	75
						SC lipid viscosity [bottom] CV (%) : Female	0
						Viable Epidermis thickness µm : Female	40
						Viable Epidermis thickness CV (%) : Female	19
						Dermis thickness µm : Female	1240
						Dermis thickness CV (%) : Female	20
						Subcutis thickness mm : Female	17.07
						Subcutis thickness CV (%) : Female	37.1
						Muscle thickness mm : Female	26.32
						Muscle thickness CV (%) : Female	42.45
						Dermis regional blood flow scalar : Female	0.839286
						Dermis regional blood flow scalar CV (%) : Female	0
						Subcutis regional blood flow scalar : Female	1
						Subcutis regional blood flow scalar CV (%) : Female	0
						Muscle regional blood flow scalar : Female	1
						Muscle regional blood flow scalar CV (%) : Female	0
						MPMLA - Back
						Skin surface pH : Female	5.2
						Skin surface pH CV (%) : Female	8.4
						Skin temperature °C : Female	32
						Skin temperature CV (%) : Female	0
						Shape of corneocyte : Male	Cuboid (brick)
						Shape of corneocyte : Female	Cuboid (brick)
						Number of SC layers : Female	18
						Number of SC layers CV (%) : Female	16
						Water density gm/cm3 : Female	1
						Water density CV (%) : Female	0
						SC lipids density gm/cm3 : Female	0.9
						SC lipids density CV (%) : Female	0
						SC proteins density gm/cm3 : Female	1.37
						SC proteins density CV (%) : Female	0
						Intercellular lipid thickness of SC µm : Female	0.091
						Intercellular lipid thickness of SC CV (%) : Female	0
						Tortuosity : Female	User Defined
						Tortuosity of lipid diffusion pathway of SC : Female	12.7
						Tortuosity of lipid diffusion pathway of SC CV (%) : Female	18
						Hair follicle diameter µm : Female	105.3
						Hair follicle diameter CV (%) : Female	60
						Hair follicle density N/cm2 : Female	29
						Hair follicle density CV (%) : Female	31
						Hair follicle depth µm : Female	446.5
						Hair follicle depth CV (%) : Female	0
						Hair shaft diameter µm : Female	18.2
						Hair shaft diameter CV (%) : Female	37
						Sebum viscosity centipose : Female	40
						Sebum viscosity CV (%) : Female	0
						Corneocyte pH [top] : Female	6.8
						Corneocyte pH [top] CV (%) : Female	6.8
						Corneocyte thickness [top] µm : Female	0.59
						Corneocyte thickness [top] CV (%) : Female	30
						Corneocyte width [top] µm : Female	29.6
						Corneocyte width [top] CV (%) : Female	5.9
						Corneocyte length [top] µm : Female	36.4
						Corneocyte length [top] CV (%) : Female	5.7
						Hydration level (% water volume) [top] : Female	33.9
						Hydration level (% water volume) [top] CV (%) : Female	9
						SC lipid viscosity [top] centipose : Female	75
						SC lipid viscosity [top] CV (%) : Female	0
						Corneocyte pH [upper mid] : Female	6.8
						Corneocyte pH [upper mid] CV (%) : Female	6.8
						Corneocyte thickness [upper mid] µm : Female	0.67
						Corneocyte thickness [upper mid] CV (%) : Female	30
						Corneocyte width [upper mid] µm : Female	29.6
						Corneocyte width [upper mid] CV (%) : Female	5.9
						Corneocyte length [upper mid] µm : Female	36.4
						Corneocyte length [upper mid] CV (%) : Female	5.7
						Hydration level (% water volume) [upper mid] : Female	44.6987
						Hydration level (% water volume) [upper mid] CV (%) : Female	6
						SC lipid viscosity [upper mid] centipose : Female	75
						SC lipid viscosity [upper mid] CV (%) : Female	0
						Corneocyte pH [lower mid] : Female	6.8
						Corneocyte pH [lower mid] CV (%) : Female	6.8
						Corneocyte thickness [lower mid] µm : Female	0.76
						Corneocyte thickness [lower mid] CV (%) : Female	30
						Corneocyte width [lower mid] µm : Female	29.6
						Corneocyte width [lower mid] CV (%) : Female	5.9
						Corneocyte length [lower mid] µm : Female	36.4
						Corneocyte length [lower mid] CV (%) : Female	5.7
						Hydration level (% water volume) [lower mid] : Female	55.5388
						Hydration level (% water volume) [lower mid] CV (%) : Female	5
						SC lipid viscosity [lower mid] centipose : Female	75
						SC lipid viscosity [lower mid] CV (%) : Female	0
						Corneocyte pH [bottom] : Female	6.8
						Corneocyte pH [bottom] CV (%) : Female	6.8
						Corneocyte thickness [bottom] µm : Female	0.86
						Corneocyte thickness [bottom] CV (%) : Female	30
						Corneocyte width [bottom] µm : Female	29.6
						Corneocyte width [bottom] CV (%) : Female	5.9
						Corneocyte length [bottom] µm : Female	36.4
						Corneocyte length [bottom] CV (%) : Female	5.7
						Hydration level (% water volume) [bottom] : Female	66.4
						Hydration level (% water volume) [bottom] CV (%) : Female	4
						SC lipid viscosity [bottom] centipose : Female	75
						SC lipid viscosity [bottom] CV (%) : Female	0
						Viable Epidermis thickness µm : Female	45.655
						Viable Epidermis thickness CV (%) : Female	15
						Dermis thickness µm : Female	1240
						Dermis thickness CV (%) : Female	20
						Subcutis thickness mm : Female	6.93
						Subcutis thickness CV (%) : Female	34.9
						Muscle thickness mm : Female	19.3
						Muscle thickness CV (%) : Female	6.22
						Dermis regional blood flow scalar : Female	1.03512
						Dermis regional blood flow scalar CV (%) : Female	0
						Subcutis regional blood flow scalar : Female	1
						Subcutis regional blood flow scalar CV (%) : Female	0
						Muscle regional blood flow scalar : Female	1
						Muscle regional blood flow scalar CV (%) : Female	0
						MPMLA - Physiology B
						Skin surface pH : Female	0
						Skin surface pH CV (%) : Female	0
						Skin temperature °C : Female	0
						Skin temperature CV (%) : Female	0
						Shape of corneocyte : Male	Cuboid (brick)
						Shape of corneocyte : Female	Cuboid (brick)
						Number of SC layers : Female	0
						Number of SC layers CV (%) : Female	0
						Water density gm/cm3 : Female	0
						Water density CV (%) : Female	0
						SC lipids density gm/cm3 : Female	0
						SC lipids density CV (%) : Female	0
						SC proteins density gm/cm3 : Female	0
						SC proteins density CV (%) : Female	0
						Intercellular lipid thickness of SC µm : Female	0
						Intercellular lipid thickness of SC CV (%) : Female	0
						Tortuosity : Female	User Defined
						Tortuosity of lipid diffusion pathway of SC : Female	0
						Tortuosity of lipid diffusion pathway of SC CV (%) : Female	0
						Hair follicle diameter µm : Female	0
						Hair follicle diameter CV (%) : Female	0
						Hair follicle density N/cm2 : Female	0
						Hair follicle density CV (%) : Female	0
						Hair follicle depth µm : Female	0
						Hair follicle depth CV (%) : Female	0
						Hair shaft diameter µm : Female	0
						Hair shaft diameter CV (%) : Female	0
						Sebum viscosity centipose : Female	0
						Sebum viscosity CV (%) : Female	0
						Corneocyte pH [top] : Female	0
						Corneocyte pH [top] CV (%) : Female	0
						Corneocyte thickness [top] µm : Female	0
						Corneocyte thickness [top] CV (%) : Female	0
						Corneocyte width [top] µm : Female	0
						Corneocyte width [top] CV (%) : Female	0
						Corneocyte length [top] µm : Female	0
						Corneocyte length [top] CV (%) : Female	0
						Hydration level (% water volume) [top] : Female	0
						Hydration level (% water volume) [top] CV (%) : Female	0
						SC lipid viscosity [top] centipose : Female	0
						SC lipid viscosity [top] CV (%) : Female	0
						Corneocyte pH [upper mid] : Female	0
						Corneocyte pH [upper mid] CV (%) : Female	0
						Corneocyte thickness [upper mid] µm : Female	0
						Corneocyte thickness [upper mid] CV (%) : Female	0
						Corneocyte width [upper mid] µm : Female	0
						Corneocyte width [upper mid] CV (%) : Female	0
						Corneocyte length [upper mid] µm : Female	0
						Corneocyte length [upper mid] CV (%) : Female	0
						Hydration level (% water volume) [upper mid] : Female	0
						Hydration level (% water volume) [upper mid] CV (%) : Female	0
						SC lipid viscosity [upper mid] centipose : Female	0
						SC lipid viscosity [upper mid] CV (%) : Female	0
						Corneocyte pH [lower mid] : Female	0
						Corneocyte pH [lower mid] CV (%) : Female	0
						Corneocyte thickness [lower mid] µm : Female	0
						Corneocyte thickness [lower mid] CV (%) : Female	0
						Corneocyte width [lower mid] µm : Female	0
						Corneocyte width [lower mid] CV (%) : Female	0
						Corneocyte length [lower mid] µm : Female	0
						Corneocyte length [lower mid] CV (%) : Female	0
						Hydration level (% water volume) [lower mid] : Female	0
						Hydration level (% water volume) [lower mid] CV (%) : Female	0
						SC lipid viscosity [lower mid] centipose : Female	0
						SC lipid viscosity [lower mid] CV (%) : Female	0
						Corneocyte pH [bottom] : Female	0
						Corneocyte pH [bottom] CV (%) : Female	0
						Corneocyte thickness [bottom] µm : Female	0
						Corneocyte thickness [bottom] CV (%) : Female	0
						Corneocyte width [bottom] µm : Female	0
						Corneocyte width [bottom] CV (%) : Female	0
						Corneocyte length [bottom] µm : Female	0
						Corneocyte length [bottom] CV (%) : Female	0
						Hydration level (% water volume) [bottom] : Female	0
						Hydration level (% water volume) [bottom] CV (%) : Female	0
						SC lipid viscosity [bottom] centipose : Female	0
						SC lipid viscosity [bottom] CV (%) : Female	0
						Viable Epidermis thickness µm : Female	0
						Viable Epidermis thickness CV (%) : Female	0
						Dermis thickness µm : Female	0
						Dermis thickness CV (%) : Female	0
						Subcutis thickness mm : Female	0
						Subcutis thickness CV (%) : Female	0
						Muscle thickness mm : Female	0
						Muscle thickness CV (%) : Female	0
						Dermis regional blood flow scalar : Female	0
						Dermis regional blood flow scalar CV (%) : Female	0
						Subcutis regional blood flow scalar : Female	0
						Subcutis regional blood flow scalar CV (%) : Female	0
						Muscle regional blood flow scalar : Female	0
						Muscle regional blood flow scalar CV (%) : Female	0

## Sheet: Population Script
Height / Weight Script
function defineHT(age, isMale)
if isMale then
if age <= 18 then
HT = 0.0000176179*age^7 - 0.00119874*age^6 + 0.0323848*age^5 - 0.444112*age^4 + 3.2946*age^3 - 13.2191*age^2 + 33.75*age + 52.62152
else
HT = 175.32 + 0.1113 * age -0.0025 * age^2
end
else
if age <= 18 then
HT = -0.00000151027*age^8 + 0.000121261*age^7 -0.0040023*age^6 + 0.070179*age^5 - 0.708233*age^4 + 4.1872*age^3 -14.3393*age^2 + 33.84778*age + 51.535477
else
HT = 161.66 + 0.1319 * age -0.0027 * age^2
end
end
return HT
end
function defineWT(age, isMale, HT)
if isMale then
WT = 7.826 * (1.0 - math.exp(age * -1.2)) + math.exp((HT * 0.0209) + (0.023 * age))
else
WT = 5.454 * (1.0 - math.exp(age * -1.57)) + math.exp((HT * 0.0224) + (0.019 * age))
end
return WT
end
Paediatric Haematocrit Script
function defineHct(age, HT, WT, isMale)_x000D_
-- Haematocrit (%) as a function of individual age per gender_x000D_
if isMale then_x000D_
Hct = 53 - ((43.0 * age^1.12 / (0.05^1.12 + age^1.12)) * (1 + (-0.93 * age^0.25 / (0.10^0.25 + age^0.25))))_x000D_
else_x000D_
Hct = 53 - ((37.4 * age^1.12 / (0.05^1.12 + age^1.12)) * (1 + (-0.80 * age^0.25 / (0.10^0.25 + age^0.25)))) _x000D_
end _x000D_
return Hct_x000D_
_x000D_
end
Paediatric Binding Protein Levels Script
function defineAGP(age, HT, WT, isMale)_x000D_
-- define alpha-1 acid glycoprotein (g/L) as a function of age in years_x000D_
AGP = 0.887 * (365*age)^0.38 / ( 8.89^0.38 + (365*age)^0.38 )_x000D_
return AGP_x000D_
end_x000D_
_x000D_
function defineHSA(age, HT, WT, isMale)_x000D_
-- define human serum albumin (g/L) as a function of age in years_x000D_
HSA = 33.746 + 1.1287 * math.log(365*age)_x000D_
return HSA_x000D_
end_x000D_
Paediatric Tissue Composition Script
function DefineTissueWater(Tissue, age) --Define percentages of water in tissues _x000D_
_x000D_
if Tissue == 0 then _x000D_
-- adipose_x000D_
water = 32.154 - 2.7863 * math.log(age)_x000D_
_x000D_
elseif Tissue == 1 then_x000D_
-- bone_x000D_
water = 64.179 - 1.2697 * age_x000D_
_x000D_
elseif Tissue == 2 then_x000D_
-- brain_x000D_
water = 83.356 - 1.2627 * math.log(age)_x000D_
_x000D_
elseif Tissue == 3 then_x000D_
-- gut_x000D_
water = 75.378 - 0.3932 * math.log(age)_x000D_
_x000D_
elseif Tissue == 4 then_x000D_
-- heart_x000D_
water = 84.523 - 0.4249 * age_x000D_
_x000D_
elseif Tissue == 5 then _x000D_
-- kidney_x000D_
water = 83.278 - 0.2162 * age_x000D_
_x000D_
elseif Tissue == 6 then_x000D_
-- liver_x000D_
water = 75.690 - 0.573 * math.log(age)_x000D_
_x000D_
elseif Tissue == 7 then_x000D_
-- lung_x000D_
water = 80.973 - 0.4916 * math.log(age)_x000D_
_x000D_
elseif Tissue == 8 then_x000D_
-- muscle_x000D_
water = 77.211 - 0.4321 * math.log(age)_x000D_
_x000D_
elseif Tissue == 15 then_x000D_
-- pancreas_x000D_
water = 78.4_x000D_
_x000D_
elseif Tissue == 9 then_x000D_
-- skin_x000D_
water = 72.395 - 1.1462 * math.log(age)_x000D_
_x000D_
elseif Tissue == 10 then_x000D_
-- spleen_x000D_
water = 79.952 - 0.4178 * math.log(age)_x000D_
_x000D_
elseif Tissue == 11 then _x000D_
-- plasma_x000D_
water = 96 - 0.0875 * age_x000D_
_x000D_
elseif Tissue == 12 then_x000D_
-- RBC_x000D_
water = 66.0_x000D_
end_x000D_
_x000D_
return water_x000D_
end_x000D_
_x000D_
_x000D_
_x000D_
function DefineTissueFat(Tissue, age) --Define percentages of Fat tissue _x000D_
_x000D_
if Tissue == 0 then _x000D_
-- adipose_x000D_
Fat = 35.5 + 43.46 * age /(1.50 + age)_x000D_
_x000D_
elseif Tissue == 1 then_x000D_
-- bone_x000D_
Fat = 0.20 + 0.3655 * age_x000D_
_x000D_
elseif Tissue == 2 then_x000D_
-- brain_x000D_
Fat = 2.75 + 9.76 * age / (2.74 + age)_x000D_
_x000D_
elseif Tissue == 3 then_x000D_
-- gut_x000D_
Fat = 2.50 + 0.185 * age_x000D_
_x000D_
elseif Tissue == 4 then_x000D_
-- heart_x000D_
Fat = 2.3159 + 0.0797 * age_x000D_
_x000D_
elseif Tissue == 5 then _x000D_
-- kidney_x000D_
Fat = 2.73 + 1.995 * age /(2.59 + age)_x000D_
_x000D_
elseif Tissue == 6 then_x000D_
-- liver_x000D_
Fat = 3.00 + 3.089 * age/(1.80 + age)_x000D_
_x000D_
elseif Tissue == 7 then_x000D_
-- lung_x000D_
Fat = 1.857 - 0.211 * math.log(age)_x000D_
_x000D_
elseif Tissue == 8 then_x000D_
-- muscle_x000D_
Fat = 1.9852 + 0.0649 * age_x000D_
_x000D_
elseif Tissue == 15 then_x000D_
-- pancreas_x000D_
Fat = 5.03_x000D_
_x000D_
elseif Tissue == 9 then_x000D_
-- skin_x000D_
Fat = 3.95_x000D_
_x000D_
elseif Tissue == 10 then_x000D_
-- spleen_x000D_
Fat = 1.5 + 0.015 * age_x000D_
_x000D_
elseif Tissue == 11 then _x000D_
-- plasma_x000D_
Fat = 0.5578 + 0.036 * math.log(age)_x000D_
_x000D_
elseif Tissue == 12 then_x000D_
-- RBC_x000D_
Fat = 0.3_x000D_
end_x000D_
_x000D_
return Fat_x000D_
end_x000D_
_x000D_
Paediatric Tissue Volumes Script
function DefineTissueVolume(Tissue, isMale, AGE, WT, HT, BSA, BMI, Haematocrit) -- Define volume of tissues in Litres_x000D_
-- AGE is age in year;_x000D_
-- WT is the body weight in kg;_x000D_
-- HT is the height in cm;_x000D_
-- BSA is body surface area in square metre_x000D_
-- BMI is in body mass index in kg per square metre_x000D_
-- Haematocrit is in percentage_x000D_
_x000D_
M_FFM = 1.480 * WT ^ 0.778 * (HT/100) ^ 0.625 -- Male Fat Free Mass (kg)_x000D_
F_FFM = 1.625 * WT ^ 0.736 * (HT/100) ^ 0.561 -- Female Fat Free Mass (kg)_x000D_
_x000D_
if Tissue == sc.TISSUE_ADIPOSE then_x000D_
if isMale then_x000D_
Volume = (WT - M_FFM) / 0.856 /0.923_x000D_
else_x000D_
Volume = (WT - F_FFM) / 0.834 /0.923_x000D_
end_x000D_
_x000D_
elseif Tissue == sc.TISSUE_BONE then_x000D_
-- bone // -- bone density = (0.0067 * AGE + 1.65)_x000D_
if isMale then_x000D_
Volume = (0.31 * WT ^ 0.47 * (HT/100) ^ 1.75)/(0.0067 * AGE + 1.65)_x000D_
else_x000D_
Volume = (0.624 * WT ^ 0.219 * (HT/100) ^ 2.66)/(0.0067 * AGE + 1.65)_x000D_
end_x000D_
_x000D_
elseif Tissue == sc.TISSUE_BRAIN then_x000D_
if isMale then_x000D_
Volume = 0.5311 * WT - 0.099 * WT * math.log(HT)_x000D_
else_x000D_
Volume = 0.5545 * WT - 0.1046 * WT * math.log(HT)_x000D_
end_x000D_
_x000D_
elseif Tissue == sc.TISSUE_GUT then_x000D_
if isMale then_x000D_
Volume = (0.148 * WT ^ 0.28 * (HT/100) ^ 1.55) / 1.04_x000D_
else_x000D_
Volume = (0.075 * WT ^ 0.52 * (HT/100) ^ 1.12) / 1.04_x000D_
end_x000D_
_x000D_
elseif Tissue == sc.TISSUE_HEART then_x000D_
if isMale then_x000D_
Volume = (0.149 * BSA ^1.3 ) / 1.04_x000D_
else_x000D_
Volume = (0.13 * BSA ^ 1.19 )/ 1.04_x000D_
end_x000D_
_x000D_
elseif Tissue == sc.TISSUE_KIDNEY then_x000D_
if isMale then_x000D_
Volume = (4.214 * WT ^ 0.823 + 4.456 * WT ^ 0.795) / 1000_x000D_
else_x000D_
Volume = (4.214 * WT ^ 0.823 + 4.456 * WT ^ 0.795) / 1000_x000D_
end_x000D_
_x000D_
elseif Tissue == sc.TISSUE_LIVER then_x000D_
if isMale then_x000D_
Volume = 0.722 * BSA ^ 1.176_x000D_
else_x000D_
Volume = 0.722 * BSA ^ 1.176_x000D_
end_x000D_
_x000D_
elseif Tissue == sc.TISSUE_LUNG then_x000D_
-- lung, excluding of blood_x000D_
if isMale then_x000D_
Volume = (9.899 * WT ^ 0.887) / 1000 / 1.05_x000D_
else_x000D_
Volume = (9.94 * WT ^ 0.884) / 1000 / 1.05_x000D_
end_x000D_
_x000D_
elseif Tissue == sc.TISSUE_MUSCLE then_x000D_
if isMale then_x000D_
Volume = (0.0084 * AGE + 0.317) * M_FFM / 1.04_x000D_
else_x000D_
Volume = (0.0066 * AGE + 0.296) * F_FFM / 1.04_x000D_
end_x000D_
_x000D_
elseif Tissue == sc.TISSUE_PANCREAS then_x000D_
if isMale then_x000D_
Volume = math.exp(-3.431 + 2.43 * math.log(HT/100)) / 1.05_x000D_
else_x000D_
Volume = math.exp(-3.431 + 2.43 * math.log (HT/100)) / 1.05_x000D_
end_x000D_
_x000D_
elseif Tissue == sc.TISSUE_SKIN then_x000D_
if isMale then_x000D_
Volume = BSA * (0.0012 * AGE ^ 2 + 0.017 * AGE + 0.6791) / 1.1_x000D_
else_x000D_
Volume = BSA * (0.0005 * AGE ^ 2 + 0.0202 * AGE + 0.682) / 1.1_x000D_
end_x000D_
_x000D_
elseif Tissue == sc.TISSUE_SPLEEN then_x000D_
if isMale then_x000D_
Volume = (0.0127 * (HT/100) * WT ^ 0.44 ) / 1.06_x000D_
else_x000D_
Volume = (0.0106 * (HT/100) ^ 0.97 * WT ^ 0.5 ) / 1.06_x000D_
end_x000D_
_x000D_
elseif Tissue == sc.TISSUE_BLOOD then_x000D_
if isMale then_x000D_
Volume = (1.628 * BSA) ^ 1.476_x000D_
else_x000D_
Volume = (1.614 * BSA) ^ 1.343_x000D_
end_x000D_
_x000D_
elseif Tissue == sc.TISSUE_YELLOW_MARROW then_x000D_
if isMale then_x000D_
Volume = 1.09e-5 * AGE * math.exp(math.log10(HT) * 4.0)_x000D_
else_x000D_
Volume = 3.8e-6 * AGE * math.exp(math.log10(HT) * 4.47)_x000D_
end_x000D_
end_x000D_
_x000D_
return Volume_x000D_
end_x000D_
Blood Flow Script
function DefineCardiacOutput(age, WT, BSA)_x000D_
_x000D_
CO = BSA * (110 + (184.974 * (math.exp(-0.0378 * age) - math.exp(-0.2477 * age))))*0.8_x000D_
return CO_x000D_
_x000D_
end_x000D_
_x000D_
_x000D_
_x000D_
function DefineTissueBF(Tissue, isMale, age) --Define tissue blood flow as percentage of cardiac output _x000D_
_x000D_
if Tissue == 68 then _x000D_
-- Adipose_x000D_
if isMale then_x000D_
BF = 5.00 -- this is 5% of cardiac output for male_x000D_
else_x000D_
BF = 5.00 + (3.59 * age^5.0/(14.49^5.0 + age^5.0)) -- female adipose blood flow_x000D_
end_x000D_
_x000D_
elseif Tissue == 78 then_x000D_
-- Lung_x000D_
BF = 100 _x000D_
_x000D_
elseif Tissue == 80 then_x000D_
-- Skin_x000D_
BF = 1.0335 + (4.0*age^5.0/(5.16^5.0 + age^5.0)) _x000D_
_x000D_
elseif Tissue == 75 then_x000D_
-- Kidney_x000D_
if isMale then_x000D_
BF = 4.53 + (14.63*age^1.0/(0.188^1.0 + age^1.0)) _x000D_
else_x000D_
BF = 4.53 + (13.00*age^1.15/(0.188^1.15 + age^1.15)) _x000D_
end_x000D_
_x000D_
elseif Tissue == 70 then _x000D_
-- Brain_x000D_
BF = 10 + 2290 *(math.exp(-0.608*age) - math.exp(-0.639*age))_x000D_
_x000D_
elseif Tissue == 79 then _x000D_
-- Muscle_x000D_
if isMale then_x000D_
BF = 6.03 + (12*age^2.5/(11^2.5 + age^2.5)) _x000D_
else_x000D_
BF = 6.03 + (7*age^2.5/(12^2.5 + age^2.5)) _x000D_
end_x000D_
_x000D_
elseif Tissue == 69 then _x000D_
-- Bone_x000D_
BF = 5.00 _x000D_
_x000D_
elseif Tissue == 71 then _x000D_
-- Stomach and Oesophagus_x000D_
BF = 1.00 _x000D_
_x000D_
elseif Tissue == 72 then _x000D_
-- Small Intestine_x000D_
if isMale then_x000D_
BF = 10.00 _x000D_
else_x000D_
BF = 11.00 _x000D_
end_x000D_
_x000D_
elseif Tissue == 73 then _x000D_
-- Large Intestine_x000D_
if isMale then_x000D_
BF = 4.00 _x000D_
else_x000D_
BF = 5.00 _x000D_
end_x000D_
_x000D_
elseif Tissue == 82 then_x000D_
-- Villi_x000D_
BF = 6.00 _x000D_
_x000D_
elseif Tissue == 81 then _x000D_
-- Spleen_x000D_
if isMale then_x000D_
BF = 2.00 _x000D_
else_x000D_
BF = 3.00 _x000D_
end_x000D_
_x000D_
elseif Tissue == 222 then _x000D_
-- Pancreas_x000D_
BF = 1.00 _x000D_
_x000D_
elseif Tissue == 76 then _x000D_
-- Liver arterial_x000D_
BF = 6.5_x000D_
_x000D_
elseif Tissue == 77 then _x000D_
-- Liver portal_x000D_
if isMale then_x000D_
BF = 19_x000D_
else_x000D_
BF = 21.5_x000D_
end_x000D_
_x000D_
elseif Tissue == 32 then _x000D_
-- Liver total_x000D_
if isMale then_x000D_
BF = 6.5 + 19_x000D_
else_x000D_
BF = 6.5 + 21.5_x000D_
end _x000D_
_x000D_
elseif Tissue == 74 then _x000D_
-- Heart_x000D_
if isMale then_x000D_
BF = 4.00 _x000D_
else_x000D_
BF = 5.00 _x000D_
end_x000D_
end_x000D_
_x000D_
return BF_x000D_
end _x000D_

## Sheet: Custom Dosing - Sub
Wsp-Propofol_retrograde_Cyp2B6 Dosing
Dose Number	Day	Time	Offset (h)	Dose	Dose Units	Route of Administration	Calculate AUC	Duration (h)
1	1	09:00:00	0	2	mg/kg	iv	No	0.005
2	1	09:01:00	0.0166667	2.25	mg/kg	iv	No	0.25
3	1	09:16:00	0.266667	3.5	mg/kg	iv	No	0.5
4	1	09:46:00	0.766667	6	mg/kg	iv	No	1
5	1	10:46:00	1.76667	10	mg/kg	iv	No	2

## Sheet: Demographic Data
				Statistics	Whole Population
					Age (Years)	Weight (kg)	Height (cm)	BSA (m²)	Brain Weight (g)	Kidney Weight (g)	Liver Weight (g)	BMI (kg/m²)	Cardiac Output (L/h)	Haematocrit (%)	HSA (g/L)	AGP (g/L)	Other (µM)	Serum Creatinine (µmol/L)	GFR (mL/min)	Renal Function	Allometric Scalar
				Mean	0.0431718	3.59208	53.6353	0.233367	512.329	25.5529	141.006	12.4812	20.8532	42.9023	36.6129	0.48037	0	n/a	4.94597	0.0397386	0.107547
				Median	0.0424261	3.51509	53.5126	0.230752	506.382	25.1608	139.001	12.4708	20.6656	42.6316	36.3223	0.48261	0	n/a	4.62132	0.0374572	0.106079
				Geometric Mean	0.0361207	3.54425	53.5518	0.232167	506.812	25.3296	140.005	12.3588	20.7391	42.6511	36.4067	0.472116	n/a	n/a	4.28976	0.0344006	0.106738
				90% confidence interval around the geometric mean(lower limit)	0.0333904	3.47684	53.2033	0.22942	498.14	24.9392	138.058	12.1563	20.4858	42.1143	35.9548	0.4617	n/a	n/a	4.00467	0.0320961	0.105212
				90% confidence interval around the geometric mean(upper limit)	0.0390744	3.61297	53.9026	0.234948	515.636	25.7261	141.979	12.5647	20.9954	43.1948	36.8643	0.482766	n/a	n/a	4.59515	0.0368705	0.108287
				5th centile	0.00857545	2.73556	48.5893	0.197217	405.284	20.5424	115.562	9.92501	17.5228	35.4694	30.2914	0.336384	0	n/a	1.43067	0.0110052	0.0878943
				95th centile	0.0776329	4.56884	58.7871	0.272986	631.2	31.1051	169.38	15.3313	24.4818	51.2635	43.6331	0.610288	0	n/a	9.09484	0.0723597	0.129131
				Skewness	0.0873706	0.341767	0.355646	0.184942	0.292978	0.270842	0.225238	0.163247	0.196617	0.406396	0.1133	-0.150868	n/a	n/a	0.536613	0.568827	0.249139
				cv	0.507733	0.164455	0.0561695	0.101769	0.147637	0.132954	0.119682	0.140035	0.105028	0.109408	0.106137	0.180166	n/a	n/a	0.482629	0.485621	0.123264
				Min Val	0.00277908	2.3982	46.2936	0.181065	365.739	18.468	104.514	8.13576	16.0638	33.8875	27.5417	0.222449	0	n/a	0.5	0.00384615	0.0796326
				Max Val	0.0829893	5.57942	65.0873	0.304205	757.059	36.5622	192.382	17.1839	27.4123	57.5851	45.319	0.689775	0	n/a	13.5322	0.112768	0.150009
				Fold	29.8622	2.3265	1.40597	1.68009	2.06994	1.97976	1.84073	2.11215	1.70646	1.6993	1.64547	3.10082	n/a	n/a	27.0644	29.3198	1.88377
				Std Dev	0.0219197	0.590735	3.01267	0.0237496	75.6385	3.39735	16.8759	1.74781	2.19018	4.69384	3.88597	0.0865465	0	n/a	2.38707	0.0192979	0.0132566
Index	Population	Trial	Sex	Sex Code	Age (Years)	Weight (kg)	Height (cm)	BSA (m²)	Brain Weight (g)	Kidney Weight (g)	Liver Weight (g)	BMI (kg/m²)	Cardiac Output (L/h)	Haematocrit (%)	HSA (g/L)	AGP (g/L)	Other (µM)	Serum Creatinine (µmol/L)	GFR (mL/min)	Renal Function	Allometric Scalar	Simulation Duration
1	0	1	M	1	0.0468379	2.48197	48.3902	0.184136	379.571	18.988	106.602	10.5994	16.4701	37.1212	29.7622	0.449766	0	n/a	0.5	0.00384615	0.0817097	0.0430206
2	0	1	F	0	0.0260597	3.64571	55.0731	0.23835	512.594	25.9145	144.4	12.02	21.167	51.8864	34.5199	0.459783	0	n/a	4.4783	0.0373192	0.109022	0.0430441
3	0	1	F	0	0.0808066	4.69665	56.9727	0.276831	643.032	31.8071	172.189	14.4696	25.048	39.4986	41.13	0.517677	0	n/a	13.5322	0.112768	0.131831	0.0418397
4	0	1	F	0	0.0192995	3.65006	52.0499	0.233225	535.623	25.9395	140.755	13.4729	20.6632	40.5562	29.8929	0.42636	0	n/a	4.30611	0.0358842	0.109119	0.0415361
5	0	1	M	1	0.0686447	5.57942	57.2128	0.304205	757.059	36.5622	192.382	17.0452	27.4123	36.3421	32.9681	0.447046	0	n/a	10.1903	0.078387	0.150009	0.0419449
6	0	1	F	0	0.0379043	4.82382	52.9827	0.27287	698.544	32.502	169.295	17.1839	24.332	49.2215	37.5629	0.422366	0	n/a	10.4079	0.0867323	0.134499	0.0463602
7	0	1	F	0	0.0724963	3.67881	49.6398	0.22985	558.815	26.1046	138.363	14.9296	20.739	40.6378	39.274	0.675429	0	n/a	3.69927	0.0308272	0.109763	0.0389405
8	0	1	F	0	0.0425106	3.06512	51.7717	0.211864	451.574	22.522	125.72	11.4357	18.9221	39.0724	38.4121	0.537489	0	n/a	2.64285	0.0220238	0.0957221	0.0466917
9	0	1	M	1	0.053582	4.56812	54.2733	0.267533	644.645	31.1011	165.408	15.5083	23.9848	38.4969	36.4052	0.467282	0	n/a	6.9628	0.05356	0.129116	0.0560164
10	0	1	M	1	0.0398964	4.20786	52.1244	0.251904	611.31	29.1017	154.104	15.4874	22.478	43.8082	39.6911	0.519999	0	n/a	6.29532	0.0484256	0.121401	0.0409983
11	0	1	F	0	0.0238442	3.35373	51.3782	0.221698	496.877	24.2224	132.61	12.7049	19.6731	47.1817	40.8996	0.419693	0	n/a	3.2195	0.0268291	0.102405	0.0424952
12	0	1	M	1	0.0688896	3.68715	62.1339	0.251549	468.977	26.1525	153.848	9.55066	22.6693	38.0413	36.1802	0.689775	0	n/a	8.36603	0.0643541	0.10995	0.094358
13	0	1	F	0	0.0725953	4.15571	53.8936	0.253553	594.088	28.8096	155.291	14.3078	22.8785	40.8275	43.4809	0.556928	0	n/a	6.56779	0.0547316	0.120271	0.0442026
14	0	1	M	1	0.00706537	2.47957	48.837	0.184712	376.858	18.9732	106.994	10.3963	16.2952	47.8198	37.5144	0.317695	0	n/a	0.5	0.00384615	0.0816505	0.0486766
15	0	1	F	0	0.0469213	3.4726	52.6584	0.228105	505.191	24.9145	137.128	12.5233	20.4034	41.6804	34.3686	0.463295	0	n/a	4.65467	0.0387889	0.105116	0.0400929
16	0	1	F	0	0.0180791	4.14723	55.5278	0.256292	579.398	28.762	157.265	13.4505	22.6972	48.3337	31.5325	0.442272	0	n/a	6.51528	0.054294	0.120087	0.039098
17	0	1	F	0	0.0732517	3.87193	54.8228	0.245749	546.32	27.2076	149.686	12.8827	22.1793	39.1747	36.7057	0.531863	0	n/a	6.77524	0.0564604	0.114057	0.0464404
18	0	1	F	0	0.0225291	3.04584	51.1442	0.210128	452.774	22.4074	124.51	11.6443	18.6379	41.767	37.4645	0.518272	0	n/a	3.21013	0.0267511	0.0952702	0.0413712
19	0	1	F	0	0.0742899	4.34672	51.3023	0.254731	644.694	29.8761	156.14	16.5154	22.998	37.2212	39.1349	0.473617	0	n/a	8.42118	0.0701765	0.124394	0.0445584
20	0	1	M	1	0.0605936	3.48441	54.1906	0.231135	492.261	24.983	139.273	11.8654	20.7711	37.7061	27.927	0.472488	0	n/a	3.56837	0.027449	0.105384	0.070944
21	0	1	M	1	0.0364692	3.45413	53.0803	0.228172	495.346	24.8073	137.176	12.2595	20.3362	39.641	36.7744	0.503561	0	n/a	5.77606	0.0444313	0.104696	0.0397055
22	0	1	F	0	0.0641664	3.39264	51.0561	0.222522	504.963	24.4495	133.19	13.015	20.0214	44.3499	44.6436	0.44646	0	n/a	4.17005	0.0347504	0.103295	0.0432997
23	0	1	F	0	0.0829893	3.44354	52.4858	0.226781	502.194	24.7458	136.193	12.5004	20.5344	34.371	37.3411	0.598266	0	n/a	4.61047	0.0384206	0.104455	0.0476759
24	0	1	F	0	0.0250908	2.95904	51.3473	0.207212	438.595	21.8895	122.48	11.2232	18.3955	51.0695	38.5785	0.425538	0	n/a	2.54324	0.0211936	0.0932265	0.0420116
25	0	1	F	0	0.0643943	4.03434	54.6862	0.250992	570.329	28.127	153.448	13.4901	22.5847	44.7647	43.7035	0.54715	0	n/a	5.25154	0.0437628	0.117627	0.0421241
26	0	1	F	0	0.0617524	4.12154	52.6522	0.250109	599.651	28.6178	152.813	14.8671	22.4851	42.0945	36.5989	0.565884	0	n/a	6.64831	0.0554025	0.119528	0.0413879
27	0	1	F	0	0.0127349	3.39937	55.6537	0.230505	474.079	24.4887	138.827	10.9751	20.3754	47.4712	35.5425	0.36668	0	n/a	4.33572	0.036131	0.103449	0.0528502
28	0	1	M	1	0.00858249	3.79851	51.9897	0.238169	552.851	26.7895	144.271	14.0533	21.0223	50.7794	33.3799	0.329855	0	n/a	5.31785	0.0409065	0.112431	0.0380431
29	0	1	M	1	0.0559427	2.96551	55.8587	0.214498	409.697	21.9282	127.56	9.50424	19.2455	43.0639	37.4422	0.371729	0	n/a	3.81603	0.0293541	0.0933794	0.0407974
30	0	1	F	0	0.0645561	3.69494	51.2204	0.233272	548.665	26.1971	140.789	14.0838	20.9914	38.0782	39.4591	0.496168	0	n/a	3.55585	0.0296321	0.110124	0.0424073
31	0	1	M	1	0.0472768	3.90465	54.6359	0.24653	548.341	27.3934	150.245	13.0805	22.0542	44.4564	34.6206	0.432227	0	n/a	6.15439	0.0473415	0.114779	0.0589139
32	0	1	M	1	0.0356985	3.29203	55.5709	0.226428	456.558	23.8613	135.943	10.6603	20.1754	44.019	39.663	0.44312	0	n/a	5.26417	0.0404936	0.100989	0.0438574
33	0	1	F	0	0.0101441	3.47095	51.4953	0.226036	513.384	24.9049	135.667	13.0892	19.9623	48.31	32.5189	0.278602	0	n/a	3.58963	0.0299136	0.105078	0.0410918
34	0	1	M	1	0.0212884	3.09261	55.8139	0.219324	427.511	22.6852	130.942	9.92749	19.4451	48.3148	39.0455	0.501717	0	n/a	3.05447	0.0234959	0.0963651	0.0389192
35	0	1	F	0	0.0791601	3.90033	54.9585	0.246959	549.277	27.3689	150.552	12.9131	22.3328	40.6537	37.5343	0.488687	0	n/a	5.83284	0.048607	0.114684	0.0414948
36	0	1	M	1	0.0181814	4.29452	59.0046	0.26751	569.078	29.5855	165.392	12.3351	23.6916	43.7585	34.1912	0.430226	0	n/a	8.63755	0.0664427	0.123271	0.0426978
37	0	1	F	0	0.0785192	4.81571	56.7239	0.280096	661.625	32.4578	174.58	14.9668	25.324	34.8762	37.2448	0.59579	0	n/a	9.08576	0.0757147	0.13433	0.0409756
38	0	1	F	0	0.0685783	3.57018	54.4424	0.234608	506.447	25.4793	141.737	12.0452	21.1404	46.0439	36.1949	0.58742	0	n/a	4.38003	0.0365003	0.107323	0.103067
39	0	1	M	1	0.0660194	2.77513	53.4302	0.203363	396.096	20.7824	119.809	9.72099	18.3091	42.455	33.459	0.48288	0	n/a	2.27184	0.0174757	0.0888463	0.0395808
40	0	1	M	1	0.0570483	3.58566	50.7068	0.228621	531.097	25.5687	137.493	13.9456	20.5205	35.4491	33.0228	0.555557	0	n/a	3.93847	0.0302959	0.107672	0.0445991
41	0	1	F	0	0.0614791	3.702	50.4879	0.232182	555.516	26.2376	140.015	14.5232	20.8715	38.2708	38.5476	0.556775	0	n/a	4.51142	0.0375952	0.110282	0.0401691
42	0	1	F	0	0.0134113	2.81625	49.9003	0.199499	426.188	21.0311	117.137	11.3101	17.6389	46.4331	31.61	0.339222	0	n/a	1.82114	0.0151761	0.0898318	0.0589569
43	0	1	M	1	0.0624946	2.7819	50.5039	0.199134	413.195	20.8234	116.884	10.9067	17.9069	40.0527	32.6649	0.681152	0	n/a	1.45145	0.011165	0.0890088	0.0484558
44	0	1	F	0	0.0253002	3.14592	52.0301	0.215274	461.773	23.001	128.103	11.6208	19.1127	48.2258	34.2913	0.478156	0	n/a	2.85092	0.0237577	0.0976083	0.0597844
45	0	1	F	0	0.0226982	3.62225	50.132	0.228836	546.336	25.7795	137.645	14.4128	20.2984	47.294	31.8307	0.478159	0	n/a	4.0969	0.0341408	0.108495	0.0421294
46	0	1	F	0	0.0612174	3.7228	57.3205	0.2449	507.234	26.3568	149.077	11.3305	22.0128	44.8881	35.976	0.605668	0	n/a	5.00401	0.0417001	0.110746	0.0405328
47	0	1	F	0	0.0255744	3.39462	55.0145	0.229279	477.683	24.461	137.959	11.216	20.3581	51.3145	37.1199	0.45056	0	n/a	5.97605	0.0498004	0.10334	0.0403159
48	0	1	M	1	0.0770847	4.30362	56.0795	0.262471	592.813	29.6362	161.734	13.6844	23.7191	39.9533	33.9752	0.476349	0	n/a	7.55826	0.0581405	0.123467	0.044362
49	0	1	M	1	0.0232146	2.3982	48.5909	0.181065	365.739	18.468	104.514	10.1573	16.0638	41.9851	39.5618	0.500098	0	n/a	0.5	0.00384615	0.0796326	0.0401792
50	0	1	M	1	0.0302673	3.50601	49.5887	0.223888	527.349	25.1083	134.152	14.2577	19.9117	39.9408	29.4543	0.475904	0	n/a	4.65612	0.0358163	0.105873	0.0501121
51	0	1	M	1	0.0196249	3.15078	50.8014	0.213422	466.079	23.0298	126.808	12.2086	18.9108	53.0744	37.4756	0.37558	0	n/a	3.3666	0.0258969	0.0977215	0.0425718
52	0	1	F	0	0.0392265	3.17126	55.7021	0.22213	441.967	23.1508	132.914	10.2209	19.8165	41.9617	37.8843	0.555796	0	n/a	3.21041	0.0267534	0.0981975	0.0456951
53	0	1	M	1	0.0175456	3.1203	52.3484	0.214849	451.933	22.8494	127.805	11.3865	19.0235	46.1993	43.4387	0.353624	0	n/a	3.02934	0.0233026	0.0970117	0.0417006
54	0	1	F	0	0.041554	3.09614	53.3828	0.215618	445.822	22.7062	128.344	10.8647	19.2511	45.7232	35.8832	0.504996	0	n/a	3.18072	0.026506	0.0964478	0.041473
55	0	1	M	1	0.0567982	2.94859	52.7492	0.209038	424.748	21.8269	123.75	10.597	18.7612	42.6309	39.6543	0.483542	0	n/a	2.79201	0.021477	0.0929795	0.0427551
56	0	1	M	1	0.0357082	2.66879	55.6838	0.202423	369.566	20.1359	119.158	8.60712	18.0366	42.6323	40.8619	0.454724	0	n/a	2.43151	0.0187039	0.0862805	0.0801626
57	0	1	M	1	0.0425336	3.09409	54.3439	0.217071	436.219	22.694	129.362	10.4769	19.3873	44.7138	35.2286	0.513144	0	n/a	3.26489	0.0251145	0.0963998	0.0402472
58	0	1	M	1	0.0723133	3.36203	55.3547	0.228651	467.614	24.2709	137.514	10.9722	20.6296	35.1159	38.0476	0.494375	0	n/a	3.31434	0.0254949	0.102595	0.051131
59	0	1	M	1	0.0286516	4.55627	55.8566	0.270222	629.484	31.0359	167.365	14.6036	24.0191	44.8703	45.0753	0.449717	0	n/a	8.96616	0.0689705	0.128865	0.039178
60	0	1	M	1	0.0731493	3.88644	56.6453	0.249457	531.331	27.29	152.345	12.1122	22.5131	36.3473	33.8857	0.47459	0	n/a	6.76041	0.0520032	0.114377	0.0380953
61	0	1	M	1	0.0706406	3.47157	60.6956	0.241278	449.927	24.9085	146.488	9.42348	21.7566	36.8899	35.4808	0.58178	0	n/a	5.00877	0.038529	0.105092	0.0407344
62	0	1	M	1	0.00656458	2.86819	49.2685	0.200455	433.326	21.3443	117.796	11.816	17.6809	57.5851	34.4225	0.336727	0	n/a	2.01517	0.0155013	0.0910716	0.0380965
63	0	1	F	0	0.0505261	2.70046	48.2624	0.192482	418.469	20.3289	112.306	11.5936	17.2383	41.7871	40.2196	0.534657	0	n/a	0.987059	0.00822549	0.0870472	0.0428766
64	0	1	M	1	0.0257562	2.76416	51.794	0.200444	403.381	20.7159	117.789	10.304	17.7989	44.6494	38.1458	0.412734	0	n/a	1.78752	0.0137501	0.0885827	0.0432073
65	0	1	M	1	0.0318236	3.42968	50.5902	0.223013	508.806	24.6651	133.536	13.4005	19.8446	45.272	41.7769	0.345831	0	n/a	3.33449	0.0256499	0.10414	0.0417661
66	0	1	F	0	0.0577772	3.60901	52.1234	0.23194	529.045	25.7032	139.844	13.2838	20.8235	40.6529	36.3918	0.446355	0	n/a	3.67629	0.0306357	0.108198	0.0398419
67	0	1	M	1	0.049437	3.12359	54.9635	0.219165	436.732	22.8689	130.83	10.3396	19.6207	41.3619	44.7436	0.408328	0	n/a	3.7183	0.0286023	0.0970884	0.0384101
68	0	1	F	0	0.0308253	4.08155	53.3204	0.250048	588.234	28.393	152.769	14.3562	22.2426	44.3575	44.7486	0.407797	0	n/a	8.64348	0.072029	0.118658	0.0998589
69	0	1	F	0	0.0496459	3.85624	52.3362	0.240742	563.578	27.1184	146.105	14.0786	21.5539	35.3798	32.8871	0.487994	0	n/a	5.69768	0.0474807	0.11371	0.0394316
70	0	1	M	1	0.0695013	4.43133	57.0058	0.268369	602.931	30.3456	166.016	13.6363	24.1901	37.4077	39.9752	0.494933	0	n/a	7.87907	0.0606082	0.126205	0.0363315
71	0	1	F	0	0.0456575	2.85572	49.7908	0.200823	432.843	21.2692	118.051	11.5191	17.9554	34.0059	34.7726	0.399067	0	n/a	1.82686	0.0152239	0.0907744	0.0418884
72	0	1	F	0	0.0438054	4.58261	52.4924	0.264468	668.249	31.1809	163.182	16.6311	23.6308	46.3614	38.4348	0.610214	0	n/a	8.24853	0.0687378	0.129423	0.0388009
73	0	1	F	0	0.0718011	3.39758	50.6762	0.222038	508.459	24.4783	132.85	13.2301	20.0295	42.7306	38.5782	0.524709	0	n/a	5.16224	0.0430187	0.103408	0.0417334
74	0	1	M	1	0.0740153	4.11576	55.6067	0.255388	570.524	28.5853	156.613	13.3105	23.0551	34.8957	36.2434	0.459982	0	n/a	7.73424	0.0594942	0.119403	0.0436063
75	0	1	F	0	0.0295806	3.40188	52.0542	0.224565	499.173	24.5033	134.629	12.5547	19.9672	45.5479	30.4914	0.468107	0	n/a	4.16188	0.0346823	0.103506	0.0896446
76	0	1	F	0	0.0632231	4.10816	51.7666	0.247998	605.284	28.5426	151.298	15.3302	22.3065	33.8875	30.7851	0.496887	0	n/a	5.34742	0.0445619	0.119237	0.0436335
77	0	1	F	0	0.0668353	4.0464	57.2448	0.255993	551.906	28.195	157.05	12.348	23.0538	39.9374	39.1912	0.490298	0	n/a	7.24036	0.0603363	0.11789	0.044327
78	0	1	M	1	0.0429128	3.33639	54.9043	0.226975	466.855	24.1211	136.33	11.0679	20.2745	43.4894	36.5457	0.388492	0	n/a	4.51301	0.0347154	0.102008	0.0757918
79	0	1	F	0	0.0243705	3.64066	54.035	0.236383	519.42	25.8854	142.999	12.4689	20.98	41.6414	29.0253	0.395656	0	n/a	5.57612	0.0464677	0.108909	0.0401102
80	0	1	M	1	0.0776284	3.65846	52.3588	0.234061	529.804	25.9877	141.349	13.345	21.1556	42.2005	37.9384	0.554473	0	n/a	4.66037	0.035849	0.109308	0.0429335
81	0	1	F	0	0.0527991	4.29314	52.8808	0.256095	622.593	29.5778	157.124	15.3525	22.9532	41.6225	41.3602	0.461011	0	n/a	6.75567	0.0562972	0.123242	0.0484107
82	0	1	F	0	0.0559904	4.07153	54.9964	0.2528	573.081	28.3366	154.748	13.4613	22.6825	37.9756	35.7678	0.542333	0	n/a	6.03299	0.0502749	0.118439	0.0401692
83	0	1	M	1	0.0221582	3.10231	52.8001	0.214912	446.583	22.7428	127.85	11.128	19.0597	44.0816	36.5583	0.388566	0	n/a	3.02948	0.0233037	0.0965917	0.0772983
84	0	1	F	0	0.0266491	3.49564	48.977	0.222434	536.102	25.0481	133.128	14.5728	19.7576	49.2357	31.0592	0.433813	0	n/a	3.41747	0.0284789	0.105638	0.0459012
85	0	1	M	1	0.0149568	3.34077	50.7002	0.220075	494.869	24.1467	131.469	12.9965	19.4686	50.7009	39.5099	0.40047	0	n/a	2.85031	0.0219255	0.102108	0.0402991
86	0	1	F	0	0.0806613	3.81009	53.4664	0.241223	547.978	26.8556	146.449	13.3283	21.8251	39.5187	35.1674	0.531566	0	n/a	4.75553	0.0396294	0.112688	0.0827321
87	0	1	F	0	0.0451258	3.93076	53.8251	0.245953	562.474	27.5415	149.831	13.5677	21.9864	39.8742	33.7931	0.609442	0	n/a	6.91462	0.0576218	0.115354	0.0664615
88	0	1	M	1	0.0234255	2.8525	53.7504	0.206883	405.384	21.2498	122.251	9.87331	18.3557	47.3586	31.3361	0.358812	0	n/a	2.47215	0.0190165	0.0906976	0.0965848
89	0	1	M	1	0.0818349	3.08062	52.5372	0.21368	445.045	22.6141	126.988	11.161	19.3407	40.8021	35.2584	0.603755	0	n/a	2.85506	0.021962	0.096085	0.0428652
90	0	1	M	1	0.0265089	2.91	52.5975	0.207326	420.052	21.5956	122.559	10.5187	18.4147	46.2028	36.2404	0.383372	0	n/a	3.38586	0.0260451	0.0920654	0.0424388
91	0	1	F	0	0.0368057	3.81313	51.6379	0.23802	562.848	26.8729	144.165	14.3003	21.2165	43.1993	34.4125	0.478387	0	n/a	5.9732	0.0497767	0.112755	0.0432779
92	0	1	F	0	0.0273715	3.6498	52.497	0.234008	532.189	25.938	141.311	13.2434	20.7908	41.9407	43.5805	0.437566	0	n/a	5.5843	0.0465358	0.109113	0.0470818
93	0	1	F	0	0.0580959	2.81102	49.6061	0.198833	427.204	20.9995	116.677	11.4234	17.8532	42.0062	35.1788	0.504258	0	n/a	1.54294	0.0128578	0.0897066	0.038458
94	0	1	M	1	0.0738747	5.00692	55.803	0.284174	692.24	33.4964	177.573	16.0789	25.6525	42.7751	37.2772	0.520301	0	n/a	11.0715	0.0851651	0.13831	0.0394606
95	0	1	F	0	0.068324	4.15354	54.5083	0.254624	588.653	28.7974	156.063	13.9795	22.9421	39.0822	40.925	0.685523	0	n/a	7.33797	0.0611498	0.120224	0.0390504
96	0	1	F	0	0.0386064	3.49204	55.4162	0.233467	488.628	25.0273	140.927	11.3712	20.8235	39.5947	34.7414	0.505163	0	n/a	4.0439	0.0336992	0.105557	0.0391581
97	0	1	F	0	0.0268883	4.00235	52.3332	0.2456	584.956	27.9465	149.579	14.6137	21.8172	39.7241	36.2514	0.536406	0	n/a	9.26734	0.0772278	0.116927	0.0415838
98	0	1	M	1	0.0689873	3.70889	49.5762	0.230742	557.96	26.2771	138.994	15.0903	20.7949	40.8417	42.6833	0.571761	0	n/a	3.7986	0.02922	0.110436	0.0442469
99	0	1	M	1	0.0367888	3.06751	54.8551	0.21687	429.514	22.5362	129.22	10.1942	19.3311	44.9858	45.1898	0.454042	0	n/a	3.5325	0.027173	0.095778	0.041621
100	0	1	F	0	0.00498648	3.01654	53.0534	0.212098	436.391	22.2329	125.883	10.7172	18.6974	52.0591	36.2896	0.322147	0	n/a	3.05093	0.0254245	0.0945819	0.0395492
101	0	1	F	0	0.0267323	4.1667	53.8702	0.25387	595.855	28.8712	155.519	14.358	22.5505	41.4445	30.3007	0.300148	0	n/a	5.67833	0.0473194	0.120509	0.0415763
102	0	1	M	1	0.0164268	3.84606	54.0642	0.243516	544.278	27.0604	148.087	13.1582	21.5534	45.1272	39.2697	0.373318	0	n/a	6.12353	0.0471041	0.113485	0.0400774
103	0	1	M	1	0.0675417	3.24339	51.9877	0.218765	472.07	23.5758	130.55	12.0005	19.7059	38.9119	36.6237	0.588698	0	n/a	3.24221	0.0249401	0.0998679	0.0457275
104	0	1	M	1	0.0717063	3.2705	55.1583	0.224965	456.081	23.735	134.911	10.7496	20.2928	39.1187	41.4617	0.534952	0	n/a	4.81209	0.0370161	0.100493	0.0844258
105	0	1	F	0	0.0388001	3.91657	55.7218	0.248868	545.688	27.4611	151.922	12.6141	22.1987	44.5096	45.319	0.468546	0	n/a	4.98707	0.0415589	0.115042	0.08241
106	0	1	F	0	0.0479412	3.14263	51.226	0.213829	466.615	22.9816	127.092	11.976	19.1332	42.4002	37.3537	0.589621	0	n/a	2.33115	0.0194262	0.0975317	0.0572397
107	0	1	M	1	0.0492811	3.20347	55.3734	0.222817	445.45	23.3408	133.397	10.4476	19.9465	41.2698	44.0556	0.570474	0	n/a	3.33414	0.0256473	0.0989446	0.0450618
108	0	1	M	1	0.0588525	3.39267	56.3441	0.231389	465.688	24.4497	139.453	10.6867	20.7816	37.9948	34.434	0.460165	0	n/a	4.98662	0.0383586	0.103296	0.0439778
109	0	1	F	0	0.0328598	4.24171	57.0255	0.262167	580.318	29.2909	161.513	13.0438	23.337	44.1274	35.9872	0.510554	0	n/a	6.75449	0.0562874	0.122133	0.0427121
110	0	1	M	1	0.0377155	3.76757	51.5196	0.236272	551.873	26.6129	142.92	14.1944	21.0672	41.6864	34.1959	0.462801	0	n/a	6.85822	0.0527556	0.111744	0.0553317
111	0	1	F	0	0.0789863	4.0056	54.1971	0.24914	570.18	27.9649	152.117	13.6369	22.5287	35.4704	31.8452	0.547647	0	n/a	8.6188	0.0718233	0.116998	0.039724
112	0	1	M	1	0.074563	3.49327	51.8025	0.227352	509.723	25.0344	136.596	13.0176	20.528	43.1633	35.701	0.497851	0	n/a	4.30951	0.03315	0.105585	0.0409773
113	0	1	F	0	0.0770485	4.2942	58.6329	0.266831	574.513	29.5837	164.897	12.4911	24.1127	43.9647	36.5292	0.542248	0	n/a	6.06914	0.0505762	0.123265	0.0471459
114	0	1	F	0	0.0359194	4.10876	57.2916	0.258191	560.047	28.546	158.637	12.5178	23.0074	45.6266	34.3	0.539887	0	n/a	7.27725	0.0606437	0.11925	0.0366742
115	0	1	M	1	0.0772701	3.23937	48.4996	0.212683	494.648	23.5521	126.292	13.7716	19.221	36.7231	30.3173	0.564735	0	n/a	2.78692	0.0214379	0.099775	0.0437141
116	0	1	M	1	0.0212462	3.2463	52.9387	0.220449	466.434	23.5929	131.732	11.5836	19.5446	46.711	39.2447	0.406837	0	n/a	5.23768	0.0402898	0.0999351	0.0411671
117	0	1	F	0	0.00740757	3.52417	52.3877	0.229451	514.669	25.2134	138.08	12.841	20.2444	50.073	27.5422	0.348416	0	n/a	4.59214	0.0382678	0.106284	0.0407016
118	0	1	M	1	0.019085	4.04976	55.3124	0.252645	563.588	28.214	154.637	13.2368	22.3821	50.5301	35.4109	0.410659	0	n/a	5.81385	0.0447219	0.117964	0.0730828
119	0	1	F	0	0.0527836	2.77918	46.2936	0.192279	443.26	20.807	112.167	12.9681	17.2334	38.8771	37.0008	0.634612	0	n/a	1.09496	0.00912468	0.0889436	0.0423106
120	0	1	M	1	0.0214069	3.12134	54.1072	0.21772	441.463	22.8556	129.817	10.6618	19.3037	42.9893	37.5379	0.444353	0	n/a	4.49375	0.0345673	0.0970358	0.0395566
121	0	1	F	0	0.0236967	2.69135	46.5655	0.189426	427.537	20.2735	110.212	12.412	16.8084	43.3928	38.4291	0.363884	0	n/a	0.872883	0.00727403	0.0868269	0.0448065
122	0	1	M	1	0.0209162	3.79471	58.7757	0.249903	504.366	26.7678	152.666	10.9846	22.1534	44.9513	39.7613	0.48234	0	n/a	7.32816	0.0563705	0.112347	0.0474542
123	0	1	F	0	0.0486568	3.0175	47.2712	0.202649	474.41	22.2386	119.314	13.5038	18.1373	36.9352	35.9657	0.602426	0	n/a	3.00658	0.0250549	0.0946045	0.0400507
124	0	1	M	1	0.0530947	4.44579	54.3949	0.26389	626.359	30.4257	162.762	15.0256	23.6542	35.0764	42.6456	0.574939	0	n/a	6.9408	0.0533907	0.126514	0.0857829
125	0	1	M	1	0.00971873	2.91141	53.8445	0.209315	413.231	21.604	123.943	10.042	18.4828	48.6583	38.2075	0.416236	0	n/a	3.37222	0.0259401	0.0920988	0.040969
126	0	1	M	1	0.017633	4.03211	54.0048	0.249673	571.064	28.1145	152.5	13.8251	22.1076	49.4144	41.4207	0.426804	0	n/a	6.40698	0.0492845	0.117578	0.0989446
127	0	1	M	1	0.0132521	3.66115	56.6438	0.24157	500.542	26.0032	146.697	11.4107	21.3574	46.6451	36.4619	0.406144	0	n/a	5.68491	0.0437301	0.109368	0.041518
128	0	1	M	1	0.0513052	3.77231	57.4072	0.246794	510.538	26.6399	150.434	11.4465	22.1083	40.9785	32.2112	0.512435	0	n/a	6.12058	0.0470814	0.111849	0.0433642
129	0	1	M	1	0.0472498	2.97228	54.045	0.211969	420.733	21.9687	125.793	10.176	18.9623	42.9281	41.5175	0.544469	0	n/a	3.30404	0.0254157	0.0935392	0.0396025
130	0	1	F	0	0.0338587	4.22497	56.5256	0.260698	582.074	29.1974	160.45	13.2231	23.2143	41.8782	44.8933	0.541562	0	n/a	7.61305	0.0634421	0.121771	0.0457176
131	0	1	M	1	0.0692396	4.22729	56.8428	0.261354	576.415	29.2103	160.925	13.0831	23.5557	41.6476	33.9813	0.471293	0	n/a	7.6763	0.0590484	0.121821	0.0501488
132	0	1	M	1	0.0114974	2.59107	52.3538	0.19442	375.254	19.6603	113.637	9.4533	17.1783	50.1394	38.9183	0.383025	0	n/a	1.44213	0.0110933	0.084389	0.0434562
133	0	1	M	1	0.053108	4.07812	55.3512	0.253666	567.241	28.3737	155.372	13.3109	22.7378	38.14	40.2201	0.611793	0	n/a	6.93591	0.0533531	0.118583	0.0445513
134	0	1	M	1	0.0183905	3.47171	54.2391	0.230763	490.148	24.9094	139.009	11.801	20.4386	45.6627	28.222	0.513395	0	n/a	4.61361	0.0354893	0.105096	0.0706008
135	0	1	M	1	0.019841	2.83579	51.8455	0.203301	413.544	21.1491	119.766	10.55	18.0155	51.2608	38.5145	0.41231	0	n/a	2.2281	0.0171392	0.0902989	0.0384911
136	0	1	M	1	0.0585383	4.81031	54.4523	0.275429	677.193	32.4283	171.164	16.2234	24.7344	41.7034	30.5364	0.500949	0	n/a	9.53964	0.0733819	0.134217	0.0429647
137	0	1	F	0	0.0287194	3.19186	51.9046	0.216752	469.355	23.2723	129.138	11.8476	19.2667	45.2762	43.6294	0.439859	0	n/a	4.1939	0.0349492	0.0986754	0.0875754
138	0	1	F	0	0.0777181	3.55232	52.5752	0.230761	517.399	25.3761	139.008	12.8514	20.8579	42.2345	34.1867	0.561755	0	n/a	4.17383	0.0347819	0.10692	0.0418486
139	0	1	M	1	0.00277908	2.76925	50.7939	0.199098	409.683	20.7468	116.859	10.7334	17.5378	46.0477	38.1414	0.222449	0	n/a	1.74464	0.0134203	0.088705	0.0491466
140	0	1	F	0	0.00615556	3.35671	56.3375	0.230056	463.671	24.2398	138.509	10.5759	20.2889	55.4121	34.0934	0.311388	0	n/a	3.38553	0.0282128	0.102474	0.120358
141	0	1	F	0	0.0553756	3.83397	52.0774	0.239522	562.39	26.9916	145.235	14.1368	21.4867	35.1529	36.9581	0.544231	0	n/a	5.86431	0.0488692	0.113217	0.051126
142	0	1	M	1	0.0402876	2.86041	59.2946	0.215412	377.597	21.2974	128.2	8.13576	19.2243	42.1358	35.4938	0.638899	0	n/a	3.14435	0.0241873	0.0908861	0.0385791
143	0	1	F	0	0.0409818	3.40374	54.3441	0.228497	483.506	24.5142	137.406	11.5253	20.3969	43.9773	39.7754	0.515505	0	n/a	3.28482	0.0273735	0.103549	0.0382616
144	0	1	M	1	0.0453055	3.20103	54.7476	0.221724	448.857	23.3264	132.629	10.6797	19.8217	44.4615	43.3152	0.41378	0	n/a	3.75036	0.0288489	0.098888	0.0426167
145	0	1	F	0	0.0267756	2.91083	50.1287	0.203443	439.055	21.6006	119.864	11.5836	18.0716	46.4304	37.3628	0.483242	0	n/a	2.23495	0.0186246	0.0920851	0.0446312
146	0	1	F	0	0.00517572	3.34045	52.7002	0.223465	485.678	24.1448	133.854	12.0276	19.7008	50.7472	34.0086	0.307975	0	n/a	3.51467	0.0292889	0.102101	0.0414112
147	0	1	M	1	0.0154093	2.85791	53.4086	0.206571	408.03	21.2824	122.034	10.019	18.2769	48.0898	31.2713	0.441287	0	n/a	2.43452	0.0187271	0.0908266	0.0412316
148	0	1	F	0	0.072126	4.35444	53.575	0.259393	625.306	29.919	159.506	15.1708	23.4018	38.6701	32.5175	0.587721	0	n/a	6.48311	0.0540259	0.124559	0.0446167
149	0	1	M	1	0.0731757	4.64442	57.7602	0.276672	625.638	31.5207	172.073	13.9211	24.9695	37.6898	39.0003	0.568702	0	n/a	9.00109	0.0692391	0.13073	0.0390372
150	0	1	M	1	0.02765	4.08522	54.4832	0.252317	574.875	28.4136	154.401	13.7622	22.4197	51.3945	33.3382	0.419207	0	n/a	6.8345	0.0525731	0.118737	0.0442004
151	0	1	F	0	0.00577783	2.67349	48.5587	0.191911	412.509	20.1646	111.914	11.3382	16.9225	54.7975	27.5417	0.286191	0	n/a	0.936833	0.00780694	0.0863942	0.0428088
152	0	1	F	0	0.0423417	3.36467	52.8561	0.224597	488.118	24.2863	134.652	12.0435	20.0582	51.9435	36.2075	0.537636	0	n/a	4.12955	0.0344129	0.102656	0.0440341
153	0	1	F	0	0.0577509	4.206	54.8881	0.257055	592.911	29.0913	157.816	13.9609	23.0782	37.3718	40.7968	0.454606	0	n/a	6.90002	0.0575001	0.121361	0.0400721
154	0	1	F	0	0.0166036	3.25904	49.7904	0.21561	493.977	23.6677	128.338	13.1461	19.0846	43.3819	35.6811	0.379987	0	n/a	2.85032	0.0237527	0.100229	0.0417129
155	0	1	F	0	0.0237736	2.96311	52.0943	0.208556	434.543	21.9138	123.414	10.9186	18.5064	43.0794	33.1657	0.389684	0	n/a	2.3205	0.0193375	0.0933228	0.043375
156	0	1	F	0	0.0235804	3.25301	54.7011	0.223578	459.778	23.6323	133.934	10.8716	19.8381	38.9031	35.0049	0.389697	0	n/a	3.68135	0.0306779	0.10009	0.0461064
157	0	1	M	1	0.0492475	4.07611	59.4397	0.260864	537.053	28.3624	160.57	11.537	23.3523	38.2125	36.3551	0.446508	0	n/a	8.26522	0.0635786	0.118539	0.0721719
158	0	1	M	1	0.015165	2.73741	47.8697	0.193267	421.684	20.5536	112.845	11.9459	17.0983	42.8124	35.2595	0.47543	0	n/a	1.00743	0.00774946	0.0879389	0.0430749
159	0	1	M	1	0.0332007	2.65226	55.5544	0.201561	367.912	20.035	118.562	8.59368	17.9443	38.783	35.7464	0.514834	0	n/a	2.27715	0.0175165	0.0858793	0.0516071
160	0	1	M	1	0.0335706	3.18592	53.1282	0.218544	456.587	23.2373	130.394	11.2872	19.4587	43.0553	36.0688	0.382983	0	n/a	3.72445	0.0286496	0.0985378	0.0408873
161	0	1	F	0	0.073205	4.4371	56.7725	0.268121	609.195	30.3776	165.836	13.7665	24.198	36.1838	44.5077	0.611692	0	n/a	8.39343	0.0699453	0.126328	0.0407222
162	0	1	M	1	0.038695	3.27769	56.6503	0.227626	448.078	23.7773	136.79	10.2133	20.3032	36.9151	30.0963	0.495062	0	n/a	4.18391	0.0321839	0.100659	0.0470436
163	0	1	M	1	0.0250437	3.93517	53.2018	0.244968	563.405	27.5665	149.126	13.9031	21.747	45.3134	37.1239	0.495481	0	n/a	6.58693	0.0506687	0.115451	0.0869679
164	0	1	F	0	0.0757662	4.03366	52.6045	0.247138	587.262	28.1232	150.68	14.5765	22.3235	36.9095	40.6245	0.510074	0	n/a	4.79972	0.0399976	0.117612	0.0409957
165	0	1	F	0	0.0641605	4.91293	58.3197	0.286255	660.154	32.9868	179.103	14.4447	25.7557	38.3517	41.3897	0.511651	0	n/a	10.7555	0.0896291	0.136358	0.0497936
166	0	1	M	1	0.0306335	3.57787	53.5589	0.233361	509.784	25.5237	140.852	12.4727	20.7568	46.7178	34.3591	0.384007	0	n/a	6.38891	0.0491455	0.107497	0.039994
167	0	1	F	0	0.0225207	3.43382	54.8239	0.230382	484.496	24.6893	138.74	11.4245	20.4343	48.6421	34.4754	0.396013	0	n/a	3.46553	0.0288794	0.104234	0.040958
168	0	1	F	0	0.0563346	3.44488	53.1936	0.228036	497.369	24.7535	137.079	12.1746	20.463	38.7594	30.4698	0.49572	0	n/a	4.42989	0.0369157	0.104486	0.042438
169	0	1	M	1	0.0244236	3.8852	61.7194	0.258042	496.845	27.283	158.529	10.1993	22.9027	51.0399	43.5587	0.458989	0	n/a	8.18558	0.062966	0.11435	0.0441802
170	0	1	F	0	0.0499895	3.8105	51.6482	0.237951	562.377	26.8579	144.115	14.2847	21.3065	44.4266	35.2585	0.508493	0	n/a	4.68925	0.0390771	0.112697	0.0420971
171	0	1	M	1	0.0283728	4.42135	56.6221	0.267327	604.647	30.2903	165.259	13.7906	23.7594	40.7164	30.9378	0.35892	0	n/a	8.52749	0.0655961	0.125992	0.0393957
172	0	1	F	0	0.0446365	4.63865	58.1615	0.277247	624.669	31.489	172.494	13.7126	24.7797	40.048	39.7868	0.623622	0	n/a	9.40558	0.0783798	0.130608	0.0418756
173	0	1	F	0	0.0179673	2.90863	52.2946	0.206799	425.339	21.5874	122.193	10.6359	18.3134	46.2191	36.2676	0.387674	0	n/a	2.61379	0.0217816	0.0920329	0.0404711
174	0	1	M	1	0.047172	3.48858	53.8875	0.23077	494.866	25.0072	139.014	12.0136	20.6436	42.3156	30.1136	0.550346	0	n/a	5.08132	0.0390871	0.105478	0.0414969
175	0	1	M	1	0.0296166	3.50197	54.595	0.232444	492.061	25.0848	140.201	11.7491	20.668	39.4575	35.754	0.55014	0	n/a	6.41927	0.049379	0.105782	0.0466922
176	0	1	F	0	0.0383989	3.16747	51.1408	0.214595	470.877	23.1284	127.628	12.1109	19.1389	45.4328	37.1036	0.530519	0	n/a	3.43235	0.0286029	0.0981095	0.0406118
177	0	1	M	1	0.0627333	4.00007	56.4929	0.253083	547.975	27.9336	154.952	12.5337	22.76	38.9821	38.9341	0.551284	0	n/a	6.97854	0.053681	0.116877	0.0429581
178	0	1	M	1	0.0724219	4.40307	53.1803	0.260183	630.577	30.189	160.077	15.5688	23.4754	40.8748	35.3617	0.569459	0	n/a	7.3079	0.0562146	0.125601	0.0424055
179	0	1	M	1	0.0583657	3.10481	47.3675	0.205948	481.652	22.7576	121.602	13.838	18.4937	38.5081	37.4727	0.440214	0	n/a	2.82793	0.0217533	0.0966503	0.0402787
180	0	1	M	1	0.0485165	3.10768	50.4796	0.211314	461.737	22.7747	125.336	12.1957	18.9119	44.1009	37.5036	0.554238	0	n/a	3.28008	0.0252314	0.0967172	0.0518051
181	0	1	M	1	0.0123305	3.04988	54.8513	0.216193	427.068	22.4314	128.746	10.137	19.1076	49.9097	35.9798	0.500482	0	n/a	3.17701	0.0244385	0.0953649	0.0431215
182	0	1	F	0	0.0740436	3.64495	50.6835	0.230604	545.421	25.9101	138.897	14.1892	20.818	35.9128	39.4676	0.529174	0	n/a	4.62903	0.0385753	0.109005	0.0421586
183	0	1	F	0	0.080776	3.44958	52.7874	0.227511	500.924	24.7809	136.709	12.3796	20.5852	42.2315	33.647	0.557552	0	n/a	5.13898	0.0428248	0.104593	0.0411061
184	0	1	F	0	0.0343626	3.60171	49.1816	0.226413	550.737	25.6612	135.933	14.8903	20.1648	43.8574	31.4441	0.588006	0	n/a	4.1719	0.0347658	0.108033	0.0506447
185	0	1	F	0	0.0443445	4.04262	54.0774	0.250156	576.424	28.1738	152.847	13.824	22.3561	44.536	36.2873	0.477019	0	n/a	6.67794	0.0556495	0.117808	0.0396224
186	0	1	F	0	0.00844166	3.84198	54.6408	0.244402	543.482	27.0372	148.721	12.8683	21.5714	49.4071	41.7355	0.346911	0	n/a	5.43362	0.0452802	0.113395	0.0440741
187	0	1	F	0	0.0477196	3.62973	55.6381	0.238752	506.317	25.8225	144.686	11.7255	21.3616	39.6026	32.6407	0.539016	0	n/a	4.78303	0.0398586	0.108663	0.0426312
188	0	1	M	1	0.0710412	4.42608	65.0873	0.28267	541.801	30.3165	176.468	10.4479	25.4924	38.1853	34.0376	0.580891	0	n/a	7.39279	0.0568676	0.126093	0.0427175
189	0	1	F	0	0.0552796	4.09352	55.5055	0.254461	572.073	28.4603	155.945	13.2869	22.826	40.519	37.9666	0.546522	0	n/a	5.49827	0.0458189	0.118918	0.0433432
190	0	1	M	1	0.0138784	2.5661	50.9686	0.191365	378.722	19.5069	111.54	9.87798	16.9224	46.9426	35.4076	0.386722	0	n/a	1.0415	0.00801155	0.0837782	0.1606
191	0	1	M	1	0.0366863	2.82425	48.3774	0.197364	431.994	21.0794	115.664	12.0675	17.5918	43.6219	34.8175	0.396749	0	n/a	1.21303	0.00933101	0.0900232	0.0414672
192	0	1	F	0	0.0346721	4.32795	59.6883	0.269858	570.63	29.7717	167.1	12.148	24.0367	46.1278	32.1453	0.564245	0	n/a	8.14227	0.0678523	0.12399	0.0414484
193	0	1	F	0	0.0486849	4.33412	58.7006	0.268285	579.31	29.806	165.955	12.5781	24.0119	46.7032	38.9728	0.542158	0	n/a	10.0964	0.084137	0.124123	0.0389141
194	0	1	M	1	0.0309984	4.49129	59.637	0.275195	590.224	30.6774	170.993	12.6281	24.4809	41.9636	34.7527	0.457903	0	n/a	9.39977	0.0723059	0.127484	0.0561453
195	0	1	F	0	0.00668983	2.82854	51.7715	0.202906	416.719	21.1053	119.493	10.5531	17.8979	51.5882	33.2794	0.279902	0	n/a	1.79179	0.0149316	0.0901255	0.039904
196	0	1	F	0	0.0810938	4.5451	56.3067	0.270726	628.097	30.9743	167.732	14.3359	24.4979	35.7017	39.3313	0.559703	0	n/a	7.80238	0.0650199	0.128628	0.0424639
197	0	1	F	0	0.0274071	3.2029	52.1054	0.217487	469.634	23.3374	129.653	11.7972	19.3233	42.6627	34.6246	0.47626	0	n/a	3.70674	0.0308895	0.0989314	0.0389806
198	0	1	F	0	0.0348123	3.94793	52.2799	0.2437	577.439	27.6387	148.219	14.4444	21.7078	42.8346	41.8359	0.440893	0	n/a	5.88791	0.0490659	0.115732	0.0388622
199	0	1	M	1	0.0504319	3.62763	59.0309	0.244344	480.541	25.8105	148.679	10.4103	21.8823	42.7456	35.8523	0.449212	0	n/a	4.95052	0.0380809	0.108616	0.047414
200	0	1	F	0	0.0517681	4.18032	54.8775	0.25619	589.377	28.9475	157.192	13.881	22.9537	39.644	34.3718	0.664497	0	n/a	5.20008	0.043334	0.120805	0.0379449

## Sheet: Substrate Clearance Values
Statistics
		CL	CLh	CLr	CLmr	CLadd		CLb	CLh,b	CLr,b	CLmr,b	CLAdd,b
Mean		2.71251	2.13302	0	0.579488	0		1.88074	1.47633	0	0.40441	0
Median		2.5464	1.87664	0	0.539594	0		1.79905	1.34921	0	0.378894	0
Geometric Mean		2.4743	1.87929	n/a	0.480477	n/a		1.72058	1.30682	n/a	0.334114	n/a
90% confidence interval around the geometric mean(lower limit)		2.35155	1.77058	n/a	0.442743	n/a		1.63654	1.23258	n/a	0.307589	n/a
90% confidence interval around the geometric mean(upper limit)		2.60346	1.99468	n/a	0.521427	n/a		1.80893	1.38554	n/a	0.362927	n/a
5th centile		1.15092	0.805339	0	0.154401	0		0.846473	0.568344	0	0.0970486	0
95th centile		4.95275	4.20117	0	1.18221	0		3.40087	2.82981	0	0.832471	0
Skewness		1.27702	1.51599	n/a	0.812357	n/a		1.10232	1.35867	n/a	0.858856	n/a
cv		0.441032	0.525868	n/a	0.545333	n/a		0.430748	0.51213	n/a	0.552237	n/a
Min Val		0.515108	0.393964	0	0.0200326	0		0.374629	0.286523	0	0.0137824	0
Max Val		8.09091	7.70221	0	1.72712	0		5.07758	4.83365	0	1.21791	0
Fold		15.7072	19.5505	n/a	86.2154	n/a		13.5536	16.87	n/a	88.3671	n/a
Std Dev		1.1963	1.12169	0	0.316014	0		0.810125	0.756073	0	0.22333	0
		Plasma						Blood
Index	Trial	CL	CLh	CLr	CLmr	CLadd		CLb	CLh,b	CLr,b	CLmr,b	CLAdd,b
1	1	1.49861	1.09962	0	0.398987	0		0.926002	0.679465	0	0.246537	0
2	1	3.86943	3.60688	0	0.262554	0		2.61148	2.43428	0	0.177198	0
3	1	2.58797	1.21563	0	1.37234	0		1.92973	0.906442	0	1.02329	0
4	1	3.17487	2.48643	0	0.688435	0		1.96699	1.54047	0	0.42652	0
5	1	4.90976	3.64297	0	1.26679	0		3.22529	2.39312	0	0.83217	0
6	1	3.1921	2.25848	0	0.933618	0		2.26191	1.60035	0	0.661559	0
7	1	2.71294	2.11152	0	0.601418	0		1.97145	1.53441	0	0.437043	0
8	1	1.71939	1.18964	0	0.529745	0		1.23392	0.853747	0	0.380171	0
9	1	3.03621	2.40319	0	0.633018	0		2.11325	1.67266	0	0.44059	0
10	1	2.51608	2.11364	0	0.40244	0		1.83927	1.54509	0	0.294187	0
11	1	2.51553	1.90336	0	0.612174	0		1.86988	1.41483	0	0.455051	0
12	1	5.22501	4.32205	0	0.902963	0		3.62373	2.9975	0	0.626237	0
13	1	3.76619	3.35493	0	0.411265	0		2.89527	2.57911	0	0.316161	0
14	1	4.86538	4.67256	0	0.192818	0		3.44506	3.30853	0	0.13653	0
15	1	2.6731	2.18751	0	0.48559	0		1.79945	1.47257	0	0.326886	0
16	1	3.00442	2.3566	0	0.64782	0		1.92213	1.50767	0	0.414453	0
17	1	2.65185	1.95601	0	0.695838	0		1.85446	1.36785	0	0.486604	0
18	1	1.63419	1.41149	0	0.222695	0		1.15625	0.998684	0	0.157565	0
19	1	4.86754	3.56603	0	1.30151	0		3.53012	2.58622	0	0.943904	0
20	1	3.32782	2.82494	0	0.502884	0		1.97798	1.67908	0	0.298902	0
21	1	1.99186	1.39579	0	0.596066	0		1.39442	0.977136	0	0.417281	0
22	1	3.78539	2.86677	0	0.918621	0		2.95189	2.23554	0	0.716352	0
23	1	1.81117	1.39173	0	0.419437	0		1.27907	0.982855	0	0.29621	0
24	1	1.15094	1.0677	0	0.0832423	0		0.827991	0.768106	0	0.059885	0
25	1	3.08088	1.89901	0	1.18187	0		2.37502	1.46393	0	0.911088	0
26	1	5.47782	4.96282	0	0.514999	0		3.82428	3.46474	0	0.359541	0
27	1	1.02817	0.792021	0	0.236145	0		0.705785	0.543683	0	0.162102	0
28	1	2.57461	1.84312	0	0.731486	0		1.70373	1.21967	0	0.484055	0
29	1	1.38515	1.24753	0	0.137622	0		0.979718	0.882378	0	0.09734	0
30	1	4.39841	3.78305	0	0.615361	0		3.20472	2.75637	0	0.448357	0
31	1	3.43702	2.71402	0	0.722999	0		2.32359	1.83481	0	0.488782	0
32	1	1.1506	0.756848	0	0.393755	0		0.840767	0.553043	0	0.287724	0
33	1	3.31805	2.62936	0	0.688684	0		2.16205	1.7133	0	0.448748	0
34	1	1.54225	1.16096	0	0.38129	0		1.11706	0.840893	0	0.276171	0
35	1	3.27625	2.85054	0	0.425713	0		2.32054	2.01901	0	0.301528	0
36	1	1.42652	1.10589	0	0.320629	0		0.957388	0.742202	0	0.215186	0
37	1	3.39166	1.66454	0	1.72712	0		2.39169	1.17378	0	1.21791	0
38	1	2.54976	1.93006	0	0.619698	0		1.76876	1.33888	0	0.429882	0
39	1	2.72951	1.83956	0	0.889956	0		1.80875	1.21901	0	0.589743	0
40	1	1.67254	1.05907	0	0.61347	0		1.09979	0.6964	0	0.403392	0
41	1	4.28805	2.88209	0	1.40595	0		3.08345	2.07246	0	1.01099	0
42	1	1.80335	1.38051	0	0.422845	0		1.15542	0.884499	0	0.270919	0
43	1	1.7714	1.18077	0	0.590633	0		1.15732	0.77144	0	0.385881	0
44	1	4.51671	3.81866	0	0.698047	0		3.03652	2.56723	0	0.469287	0
45	1	2.93129	2.88723	0	0.0440599	0		1.8859	1.85755	0	0.0283468	0
46	1	2.34543	1.67373	0	0.671699	0		1.62134	1.15701	0	0.464329	0
47	1	1.97588	1.41052	0	0.565357	0		1.39066	0.992749	0	0.397907	0
48	1	2.15125	1.86982	0	0.281433	0		1.43844	1.25026	0	0.188181	0
49	1	0.997232	0.590765	0	0.406466	0		0.727652	0.431065	0	0.296587	0
50	1	2.52642	1.67914	0	0.847281	0		1.55128	1.03103	0	0.52025	0
51	1	2.20923	1.72255	0	0.486682	0		1.56338	1.21897	0	0.344404	0
52	1	0.755167	0.530331	0	0.224836	0		0.53771	0.377617	0	0.160093	0
53	1	3.22613	3.06109	0	0.165037	0		2.47878	2.35197	0	0.126806	0
54	1	1.3793	1.0921	0	0.287207	0		0.952059	0.753815	0	0.198244	0
55	1	1.95081	1.22534	0	0.725463	0		1.42531	0.895271	0	0.530044	0
56	1	2.31533	2.02169	0	0.29364	0		1.72018	1.50202	0	0.218161	0
57	1	2.42821	2.08271	0	0.345502	0		1.65829	1.42234	0	0.235953	0
58	1	2.4071	2.13028	0	0.276816	0		1.71814	1.52056	0	0.197586	0
59	1	1.37634	1.11095	0	0.265386	0		1.07886	0.870832	0	0.208025	0
60	1	2.63002	2.55621	0	0.073808	0		1.75584	1.70657	0	0.0492755	0
61	1	5.00246	4.12376	0	0.878703	0		3.43049	2.82791	0	0.602579	0
62	1	1.94652	1.65187	0	0.294654	0		1.31154	1.11301	0	0.198534	0
63	1	4.51563	3.91021	0	0.605427	0		3.32547	2.87961	0	0.445857	0
64	1	1.1031	0.743191	0	0.359911	0		0.788526	0.531252	0	0.257274	0
65	1	4.12882	3.56185	0	0.566969	0		3.10533	2.67891	0	0.426423	0
66	1	1.42238	1.34606	0	0.0763185	0		0.989788	0.936681	0	0.0531074	0
67	1	2.5448	1.83249	0	0.712315	0		1.98686	1.43072	0	0.556141	0
68	1	3.68932	3.07663	0	0.61269	0		2.88061	2.40223	0	0.478387	0
69	1	2.32966	1.77486	0	0.5548	0		1.52816	1.16424	0	0.363927	0
70	1	3.47186	2.71078	0	0.761077	0		2.5481	1.98953	0	0.558578	0
71	1	2.95488	2.1659	0	0.788975	0		2.00274	1.468	0	0.534749	0
72	1	2.13213	0.964555	0	1.16757	0		1.53063	0.692444	0	0.838188	0
73	1	2.58115	1.70771	0	0.873439	0		1.85688	1.22853	0	0.628354	0
74	1	2.38116	1.45961	0	0.921554	0		1.65308	1.01331	0	0.639773	0
75	1	1.59854	1.09882	0	0.499714	0		1.0023	0.688973	0	0.313326	0
76	1	4.45143	4.11701	0	0.33442	0		2.80723	2.59633	0	0.210897	0
77	1	1.5552	1.10914	0	0.446062	0		1.12881	0.805042	0	0.323763	0
78	1	5.56675	4.53622	0	1.03053	0		3.88312	3.16426	0	0.718854	0
79	1	3.24727	2.64016	0	0.607118	0		1.97619	1.60672	0	0.369473	0
80	1	1.64507	1.12769	0	0.517379	0		1.17231	0.803612	0	0.368693	0
81	1	2.71776	1.86189	0	0.855874	0		2.03278	1.39262	0	0.64016	0
82	1	4.48621	2.97955	0	1.50666	0		3.09084	2.0528	0	1.03803	0
83	1	1.84208	1.52683	0	0.315254	0		1.28521	1.06526	0	0.219951	0
84	1	3.54067	3.48748	0	0.0531946	0		2.24479	2.21106	0	0.0337254	0
85	1	1.75964	1.29976	0	0.459887	0		1.28302	0.947698	0	0.33532	0
86	1	1.8947	0.984968	0	0.90973	0		1.29264	0.671985	0	0.620655	0
87	1	2.12572	1.86807	0	0.257655	0		1.41689	1.24515	0	0.171739	0
88	1	2.22301	1.88346	0	0.339548	0		1.4169	1.20048	0	0.216421	0
89	1	3.02524	2.18522	0	0.840023	0		2.06704	1.49308	0	0.573958	0
90	1	2.9886	2.65316	0	0.335437	0		2.07469	1.84183	0	0.232861	0
91	1	1.7696	0.828548	0	0.941047	0		1.19213	0.558171	0	0.633958	0
92	1	1.52896	0.80604	0	0.722919	0		1.17685	0.620415	0	0.556437	0
93	1	1.53328	0.999744	0	0.533539	0		1.04626	0.682195	0	0.36407	0
94	1	2.6985	1.71242	0	0.986083	0		1.90384	1.20814	0	0.6957	0
95	1	2.41886	1.70152	0	0.717341	0		1.79864	1.26523	0	0.533409	0
96	1	1.84009	1.52427	0	0.31582	0		1.24652	1.03258	0	0.213943	0
97	1	3.45134	2.90434	0	0.546999	0		2.39634	2.01655	0	0.379793	0
98	1	2.76763	1.80348	0	0.964147	0		2.10624	1.3725	0	0.733742	0
99	1	1.07879	0.775341	0	0.303451	0		0.846773	0.608586	0	0.238187	0
100	1	1.59674	1.28651	0	0.310229	0		1.10932	0.893791	0	0.215529	0
101	1	3.35217	2.95075	0	0.401421	0		2.09391	1.84316	0	0.250745	0
102	1	1.62527	1.10507	0	0.520193	0		1.18099	0.802993	0	0.377994	0
103	1	1.26171	0.834436	0	0.427269	0		0.881188	0.582779	0	0.298409	0
104	1	2.49178	2.18829	0	0.303482	0		1.86628	1.63898	0	0.227301	0
105	1	3.31354	2.79661	0	0.516936	0		2.60488	2.1985	0	0.406379	0
106	1	3.4756	3.2488	0	0.226803	0		2.45497	2.29477	0	0.160201	0
107	1	1.89992	1.35553	0	0.544387	0		1.47101	1.04952	0	0.421491	0
108	1	5.0441	4.2527	0	0.791399	0		3.39932	2.86598	0	0.533339	0
109	1	1.5272	0.991869	0	0.53533	0		1.05591	0.685779	0	0.370128	0
110	1	3.07108	3.00776	0	0.0633188	0		2.06128	2.01878	0	0.042499	0
111	1	2.35891	1.83992	0	0.518987	0		1.51806	1.18407	0	0.333991	0
112	1	4.20806	3.66789	0	0.540172	0		2.89607	2.52431	0	0.371757	0
113	1	6.53451	6.35385	0	0.180658	0		4.557	4.43102	0	0.125986	0
114	1	2.78657	2.45377	0	0.332799	0		1.87365	1.64988	0	0.223769	0
115	1	3.24107	2.63204	0	0.609022	0		2.02518	1.64463	0	0.380547	0
116	1	3.19726	2.97748	0	0.219774	0		2.32243	2.16279	0	0.15964	0
117	1	5.08362	4.19846	0	0.885159	0		2.9959	2.47426	0	0.521646	0
118	1	3.25653	2.36793	0	0.888605	0		2.23065	1.62198	0	0.608674	0
119	1	2.58502	1.74829	0	0.836735	0		1.81604	1.22821	0	0.587826	0
120	1	1.78871	0.972985	0	0.81573	0		1.267	0.689193	0	0.577804	0
121	1	1.16963	0.533905	0	0.635723	0		0.839593	0.383253	0	0.45634	0
122	1	2.24865	1.95942	0	0.289228	0		1.64541	1.43377	0	0.211637	0
123	1	1.744	1.1538	0	0.590201	0		1.20539	0.797462	0	0.407924	0
124	1	1.80993	1.05773	0	0.752194	0		1.37674	0.804576	0	0.572164	0
125	1	2.37127	1.95165	0	0.419615	0		1.6966	1.39637	0	0.300227	0
126	1	3.1324	2.59994	0	0.532455	0		2.3448	1.94623	0	0.398577	0
127	1	1.53316	0.816608	0	0.716549	0		1.06805	0.568879	0	0.499174	0
128	1	2.0803	1.65013	0	0.430169	0		1.3479	1.06918	0	0.278722	0
129	1	1.89218	1.39563	0	0.496548	0		1.41825	1.04607	0	0.372179	0
130	1	3.89557	2.87471	0	1.02086	0		3.04695	2.24847	0	0.798471	0
131	1	2.19323	1.31968	0	0.873548	0		1.46666	0.882499	0	0.584159	0
132	1	3.20195	2.84514	0	0.356809	0		2.31493	2.05697	0	0.257964	0
133	1	2.95643	2.10151	0	0.854912	0		2.17722	1.54763	0	0.62959	0
134	1	2.30844	1.7328	0	0.575635	0		1.38095	1.0366	0	0.344356	0
135	1	1.61585	1.20242	0	0.413436	0		1.16136	0.864213	0	0.297149	0
136	1	8.09091	7.70221	0	0.388701	0		5.07758	4.83365	0	0.243936	0
137	1	1.4923	1.12523	0	0.367068	0		1.14933	0.866626	0	0.282707	0
138	1	3.97065	3.33831	0	0.632343	0		2.66465	2.24029	0	0.424356	0
139	1	1.08624	0.829065	0	0.257175	0		0.776423	0.592599	0	0.183824	0
140	1	1.57237	1.34448	0	0.227889	0		1.05351	0.90082	0	0.152689	0
141	1	2.71257	1.95937	0	0.7532	0		1.90439	1.3756	0	0.528791	0
142	1	1.84568	1.50461	0	0.341071	0		1.26596	1.03202	0	0.233942	0
143	1	2.45718	1.65267	0	0.804503	0		1.79835	1.20955	0	0.588797	0
144	1	1.90589	1.67358	0	0.232316	0		1.46212	1.2839	0	0.178223	0
145	1	2.34773	1.98932	0	0.358416	0		1.65854	1.40534	0	0.253201	0
146	1	1.40195	1.19787	0	0.204081	0		0.937953	0.801416	0	0.136537	0
147	1	3.38001	2.73551	0	0.644507	0		2.15169	1.7414	0	0.410287	0
148	1	3.67041	2.22354	0	1.44687	0		2.39159	1.44883	0	0.94276	0
149	1	1.49285	1.30957	0	0.183284	0		1.08058	0.947909	0	0.132667	0
150	1	2.81021	1.88804	0	0.922175	0		1.85827	1.24848	0	0.609794	0
151	1	2.85168	2.6964	0	0.155284	0		1.68055	1.58904	0	0.0915114	0
152	1	3.74369	2.8814	0	0.862291	0		2.59751	1.99922	0	0.598289	0
153	1	2.83585	2.22828	0	0.607565	0		2.10504	1.65405	0	0.450994	0
154	1	1.99703	1.977	0	0.0200326	0		1.37395	1.36017	0	0.0137824	0
155	1	3.06314	2.57531	0	0.487834	0		2.01933	1.69773	0	0.321598	0
156	1	2.99213	2.78612	0	0.206011	0		2.03587	1.89569	0	0.140171	0
157	1	2.99029	1.82929	0	1.161	0		2.07964	1.27221	0	0.807429	0
158	1	1.9474	1.49337	0	0.454031	0		1.33061	1.02038	0	0.310229	0
159	1	2.88624	2.41874	0	0.467504	0		1.98783	1.66585	0	0.321982	0
160	1	3.00454	2.3866	0	0.617941	0		2.08006	1.65226	0	0.427803	0
161	1	3.34825	2.61447	0	0.733783	0		2.60672	2.03544	0	0.571272	0
162	1	4.99928	4.35104	0	0.64824	0		3.11003	2.70676	0	0.403267	0
163	1	1.988	1.63642	0	0.351584	0		1.39927	1.15181	0	0.247465	0
164	1	2.548	1.68936	0	0.858641	0		1.88693	1.25106	0	0.635869	0
165	1	3.76223	2.90829	0	0.853934	0		2.81511	2.17615	0	0.638961	0
166	1	2.06761	1.6327	0	0.434918	0		1.39163	1.09891	0	0.292727	0
167	1	1.57188	0.755361	0	0.816521	0		1.06006	0.509409	0	0.550655	0
168	1	3.54634	2.69584	0	0.850499	0		2.22264	1.6896	0	0.533043	0
169	1	1.10171	0.649451	0	0.452256	0		0.847763	0.499752	0	0.348011	0
170	1	2.66279	1.47401	0	1.18878	0		1.81939	1.00714	0	0.812255	0
171	1	3.3644	3.33324	0	0.0311629	0		2.12803	2.10831	0	0.019711	0
172	1	3.76885	2.26739	0	1.50146	0		2.75878	1.65971	0	1.09906	0
173	1	1.60872	1.41061	0	0.198109	0		1.11725	0.979666	0	0.137587	0
174	1	3.33882	2.31505	0	1.02377	0		2.07778	1.44068	0	0.637106	0
175	1	2.01912	1.65195	0	0.367174	0		1.39079	1.13788	0	0.252913	0
176	1	1.85314	1.40352	0	0.449613	0		1.30394	0.987574	0	0.316366	0
177	1	4.95031	4.65939	0	0.29092	0		3.57977	3.36939	0	0.210376	0
178	1	2.20503	1.54166	0	0.663373	0		1.50918	1.05515	0	0.454029	0
179	1	2.44215	1.71928	0	0.722876	0		1.72813	1.21661	0	0.511526	0
180	1	2.21416	1.71326	0	0.500893	0		1.56753	1.21292	0	0.354612	0
181	1	3.27262	2.88815	0	0.384467	0		2.26242	1.99663	0	0.265789	0
182	1	2.10612	1.57908	0	0.527037	0		1.53472	1.15067	0	0.384051	0
183	1	2.94872	2.16274	0	0.78598	0		1.96046	1.4379	0	0.522561	0
184	1	4.24785	3.44494	0	0.802916	0		2.71307	2.20026	0	0.512817	0
185	1	2.2301	1.95698	0	0.273125	0		1.54929	1.35954	0	0.189745	0
186	1	3.14116	2.16018	0	0.980972	0		2.36121	1.62381	0	0.737397	0
187	1	2.19204	1.47008	0	0.721956	0		1.43151	0.960035	0	0.471472	0
188	1	2.09348	1.39985	0	0.693627	0		1.40131	0.937017	0	0.464293	0
189	1	2.76911	2.13822	0	0.630887	0		1.97415	1.52438	0	0.449772	0
190	1	2.80421	2.20769	0	0.596519	0		1.92071	1.51214	0	0.40858	0
191	1	1.86502	1.32601	0	0.539015	0		1.26502	0.89941	0	0.365606	0
192	1	7.75911	6.43041	0	1.3287	0		5.02129	4.16143	0	0.859864	0
193	1	1.74746	1.00239	0	0.745066	0		1.26437	0.725278	0	0.539089	0
194	1	3.36103	2.84577	0	0.515262	0		2.27727	1.92815	0	0.349116	0
195	1	1.08637	0.8709	0	0.215472	0		0.717623	0.575289	0	0.142334	0
196	1	0.515108	0.393964	0	0.121144	0		0.374629	0.286523	0	0.0881057	0
197	1	3.95201	3.49748	0	0.454525	0		2.67192	2.36462	0	0.307301	0
198	1	2.14855	1.57804	0	0.570509	0		1.6172	1.18778	0	0.42942	0
199	1	4.35885	3.56708	0	0.791764	0		3.00718	2.46094	0	0.54624	0
200	1	1.27045	1.09504	0	0.175413	0		0.855278	0.737189	0	0.118089	0

## Sheet: % fm and fe SS
		% fm and fe of CYPs, UGTs, cytosolic enzymes, esterases, additional metabolic clearances, biliary, renal and additional systemic clearances
		% contribution in absence of inhibitor(s)
Index	Trial	CYP2B6 Liver	CYP2C9 Liver	UGT1A9 Liver	UGT1A9 Kidney	Renal		Statistics	% contribution in absence of inhibitor(s)
1	1	46.2905	8.15941	18.9263	26.6238	0			CYP2B6 Liver	CYP2C9 Liver	UGT1A9 Liver	UGT1A9 Kidney	Renal
2	1	80.7942	7.84446	4.57597	6.78534	0		Mean	48.0116	12.4158	16.4509	23.1217	0
3	1	12.9704	6.50608	27.4959	53.0276	0		Median	49.1679	11.2616	15.4631	22.3224	0
4	1	56.8293	8.03855	13.4483	21.6839	0		Geometric Mean	41.2843	9.86884	13.0873	19.4187	n/a
5	1	32.6981	19.8595	21.6409	25.8014	0		90% confidence interval around the geometric mean(lower limit)	38.2223	9.04595	11.9407	17.9008	n/a
6	1	31.4142	20.5527	18.7854	29.2478	0		90% confidence interval around the geometric mean(upper limit)	44.5916	10.7666	14.344	21.0654	n/a
7	1	30.8581	15.3788	31.5945	22.1685	0		5th centile	14.2711	2.80868	3.5643	5.35304	0
8	1	37.3897	10.3532	21.4471	30.8101	0		95th centile	82.9784	28.2128	34.8872	44.6923	0
9	1	26.2666	13.2558	39.6286	20.8489	0		Skewness	-0.0132635	0.990771	0.693229	0.456917	n/a
10	1	64.5269	6.43506	13.0433	15.9947	0		cv	0.445354	0.630937	0.588552	0.497579	n/a
11	1	19.0875	30.3964	26.1803	24.3358	0		Min Val	0.869215	0.894843	0.319386	0.926256	0
12	1	74.2159	4.0654	4.43719	17.2815	0		Max Val	93.1135	42.3459	46.2234	54.7609	0
13	1	63.4319	9.8964	15.7517	10.9199	0		Fold	107.124	47.3221	144.726	59.1207	n/a
14	1	91.9448	0.955215	3.13696	3.96307	0		Std Dev	21.3822	7.83356	9.68221	11.5049	0
15	1	59.1676	12.5784	10.0882	18.1658	0
16	1	48.0296	15.7392	14.669	21.5622	0
17	1	46.4728	11.6348	15.6527	26.2397	0
18	1	59.9476	9.2925	17.1326	13.6273	0
19	1	52.1479	12.0049	9.10867	26.7385	0
20	1	48.9636	28.6759	7.24905	15.1115	0
21	1	37.2482	14.1096	18.717	29.9251	0
22	1	51.5782	12.6857	11.4686	24.2675	0
23	1	18.9715	22.0663	35.8039	23.1583	0
24	1	29.7114	28.2008	34.8553	7.23256	0
25	1	42.4372	4.53566	14.6658	38.3614	0
26	1	83.2613	3.52428	3.8129	9.40154	0
27	1	20.4884	10.3206	46.2234	22.9676	0
28	1	48.0487	11.4522	12.0875	28.4115	0
29	1	38.4297	21.4658	30.169	9.93551	0
30	1	73.4226	5.90988	6.67698	13.9905	0
31	1	55.1597	5.28831	18.5164	21.0356	0
32	1	22.2389	16.4023	27.1372	34.2216	0
33	1	51.3139	11.8308	16.0997	20.7557	0
34	1	48.9585	8.51348	17.8051	24.7229	0
35	1	62.2219	10.0749	14.7092	12.9939	0
36	1	2.40626	39.6239	35.4935	22.4764	0
37	1	28.4351	12.5305	8.11188	50.9224	0
38	1	39.9344	20.1735	15.5879	24.3042	0
39	1	51.6146	6.89239	8.88805	32.6049	0
40	1	18.5292	3.87674	40.9151	36.6789	0
41	1	50.0309	12.9012	4.28012	32.7878	0
42	1	52.0691	7.67168	16.8116	23.4477	0
43	1	34.8704	14.6229	17.164	33.3426	0
44	1	77.2255	3.75176	3.56799	15.4548	0
45	1	80.1263	17.2696	1.10102	1.50309	0
46	1	16.0397	25.5303	29.7913	28.6387	0
47	1	44.6809	9.7799	16.9263	28.6129	0
48	1	62.5522	8.87608	15.4894	13.0823	0
49	1	23.6428	19.9197	15.6779	40.7595	0
50	1	20.6845	25.7211	20.0577	33.5368	0
51	1	29.6833	18.3752	29.9119	22.0295	0
52	1	21.9047	14.2941	34.0281	29.773	0
53	1	84.3627	2.88507	7.63657	5.11564	0
54	1	34.7897	17.1119	27.2757	20.8226	0
55	1	35.8069	12.777	14.2283	37.1878	0
56	1	67.2906	9.65844	10.3685	12.6824	0
57	1	47.3096	9.94599	28.5157	14.2287	0
58	1	72.2422	4.01234	12.2455	11.5	0
59	1	59.3015	6.07191	15.3446	19.282	0
60	1	92.3279	3.6658	1.1999	2.80637	0
61	1	70.4679	6.117	5.84973	17.5654	0
62	1	50.4606	18.1351	16.2669	15.1375	0
63	1	73.9998	4.67703	7.91578	13.4074	0
64	1	27.7551	20.2768	19.3408	32.6272	0
65	1	79.2896	1.81228	5.16611	13.732	0
66	1	67.4834	25.58	1.57098	5.36553	0
67	1	57.2309	5.39851	9.37967	27.991	0
68	1	72.0329	3.48763	7.87235	16.6071	0
69	1	47.8434	9.86083	18.4811	23.8147	0
70	1	60.4335	8.2747	9.37046	21.9213	0
71	1	56.1024	10.2647	6.93215	26.7008	0
72	1	12.0359	7.55251	25.6507	54.7609	0
73	1	31.6153	13.6663	20.8793	33.8392	0
74	1	27.2719	11.2764	22.7498	38.7018	0
75	1	12.2783	15.4484	41.0126	31.2607	0
76	1	80.3141	6.37767	5.79555	7.51263	0
77	1	35.8035	11.6681	23.8464	28.6819	0
78	1	63.9572	10.254	7.27653	18.5123	0
79	1	50.6018	16.9548	13.7472	18.6962	0
80	1	42.3347	6.36685	19.8482	31.4503	0
81	1	31.1198	14.9851	22.4032	31.4919	0
82	1	50.6641	6.98449	8.76724	33.5842	0
83	1	32.4984	27.435	22.9526	17.114	0
84	1	90.9989	7.17931	0.319386	1.50239	0
85	1	26.4927	28.7737	18.5983	26.1352	0
86	1	17.7675	16.9177	17.3003	48.0145	0
87	1	55.4885	10.7394	21.6513	12.1208	0
88	1	60.1558	5.93952	18.6304	15.2742	0
89	1	56.8853	5.49908	9.84851	27.7671	0
90	1	79.2517	2.81917	6.70521	11.2239	0
91	1	5.47178	16.8141	24.5355	53.1787	0
92	1	21.1562	12.51	19.052	47.2818	0
93	1	32.4095	12.3827	20.4107	34.7971	0
94	1	34.5459	12.9666	15.9456	36.5419	0
95	1	46.2315	10.172	13.9403	29.6562	0
96	1	49.3721	11.2468	22.2178	17.1633	0
97	1	53.451	19.797	10.9031	15.8489	0
98	1	38.748	13.918	12.4974	34.8366	0
99	1	29.7291	11.7755	30.3666	28.1288	0
100	1	41.2411	21.7208	17.6091	19.4289	0
101	1	36.0759	29.0081	22.941	11.975	0
102	1	20.7866	21.3291	25.8776	32.0066	0
103	1	16.7954	13.6523	35.6878	33.8644	0
104	1	63.7475	4.34254	19.7306	12.1794	0
105	1	69.0894	5.80039	9.50954	15.6007	0
106	1	83.1391	2.3567	7.97864	6.52558	0
107	1	14.899	28.4591	27.9888	28.6531	0
108	1	79.2415	0.949246	4.1197	15.6896	0
109	1	20.4733	22.8893	21.5843	35.0531	0
110	1	92.8597	3.98207	1.09646	2.06177	0
111	1	28.7874	17.723	31.4884	22.0012	0
112	1	64.3447	16.7874	6.03132	12.8366	0
113	1	89.6527	2.17609	5.40656	2.76467	0
114	1	59.2506	16.6326	12.1738	11.943	0
115	1	57.5769	11.6648	11.9675	18.7908	0
116	1	83.6623	0.894843	8.56908	6.87382	0
117	1	64.938	12.0169	5.6331	17.412	0
118	1	62.044	3.42178	7.24744	27.2868	0
119	1	52.8266	3.55641	11.2484	32.3686	0
120	1	20.4479	8.50479	25.4431	45.6042	0
121	1	0.869215	20.7232	24.055	54.3526	0
122	1	46.1397	22.0488	18.9493	12.8623	0
123	1	30.9927	12.7197	22.4458	33.8418	0
124	1	3.0381	34.3626	21.0399	41.5594	0
125	1	70.0121	6.49238	5.79973	17.6958	0
126	1	62.4818	4.32175	16.1981	16.9983	0
127	1	18.3621	21.8322	13.0689	46.7368	0
128	1	61.0541	6.71398	11.5537	20.6782	0
129	1	45.7674	14.7463	13.2441	26.2421	0
130	1	68.193	1.6953	3.90606	26.2056	0
131	1	25.1118	6.10758	28.9513	39.8293	0
132	1	69.2745	11.7786	7.80337	11.1435	0
133	1	58.9328	3.50905	8.64103	28.9171	0
134	1	45.332	14.2951	15.4368	24.9361	0
135	1	43.6114	16.4892	14.3131	25.5863	0
136	1	93.1135	0.905364	1.17697	4.80417	0
137	1	43.7601	9.82533	21.8171	24.5975	0
138	1	67.6185	8.41339	8.04273	15.9254	0
139	1	28.6569	23.9559	23.7114	23.6757	0
140	1	25.6577	16.0872	43.7618	14.4933	0
141	1	24.4298	20.7418	27.0614	27.767	0
142	1	57.3899	5.08532	19.0454	18.4794	0
143	1	34.2786	17.6849	15.2956	32.741	0
144	1	63.7724	11.0292	13.0091	12.1893	0
145	1	58.6896	9.23039	16.8135	15.2665	0
146	1	59.7626	10.2778	15.4026	14.5569	0
147	1	60.9294	6.34477	13.6576	19.0682	0
148	1	31.701	19.239	9.64016	39.4198	0
149	1	32.2233	11.7072	43.7921	12.2774	0
150	1	47.2216	11.1122	8.85108	32.8152	0
151	1	71.3451	6.38829	16.8213	5.44534	0
152	1	51.9944	7.27973	17.6927	23.0332	0
153	1	25.9462	23.5595	29.0698	21.4245	0
154	1	82.97	14.6086	1.41834	1.00312	0
155	1	67.4259	8.08483	8.56334	15.9259	0
156	1	73.0014	8.62404	11.4894	6.88508	0
157	1	44.3896	4.27125	12.5137	38.8255	0
158	1	32.6742	18.5907	25.4203	23.3148	0
159	1	61.4176	4.08741	18.2974	16.1977	0
160	1	57.0963	7.23078	15.1061	20.5669	0
161	1	56.7632	5.32095	16.0004	21.9154	0
162	1	74.8564	5.88841	6.28856	12.9667	0
163	1	43.4324	22.195	16.6872	17.6853	0
164	1	5.6551	32.6464	27.9998	33.6986	0
165	1	56.7625	6.55486	13.9851	22.6976	0
166	1	31.7197	28.4408	18.8047	21.0348	0
167	1	8.59089	5.97427	33.4894	51.9454	0
168	1	61.1877	6.2499	8.57997	23.9825	0
169	1	14.3396	16.0688	28.5411	41.0505	0
170	1	34.4914	11.6582	9.20609	44.6443	0
171	1	82.9089	14.8256	1.33932	0.926256	0
172	1	47.5893	5.05981	7.51205	39.8388	0
173	1	40.6795	26.5108	20.495	12.3147	0
174	1	46.3708	11.7171	11.2493	30.6628	0
175	1	62.2725	4.29533	15.2473	18.1848	0
176	1	31.7708	16.7607	27.2062	24.2623	0
177	1	65.4401	21.2946	7.3885	5.87681	0
178	1	37.4622	12.0416	20.4116	30.0845	0
179	1	58.5837	5.79117	6.02522	29.5999	0
180	1	48.869	7.97318	20.5355	22.6223	0
181	1	77.8175	4.82703	5.60751	11.748	0
182	1	54.2163	9.19581	11.5638	25.0241	0
183	1	55.6814	7.27823	10.3854	26.655	0
184	1	50.4639	22.9323	7.70216	18.9017	0
185	1	42.8342	22.4838	22.4348	12.2472	0
186	1	53.529	5.45972	9.7816	31.2297	0
187	1	25.001	17.2514	24.8122	32.9354	0
188	1	22.7067	11.467	32.6935	33.1328	0
189	1	53.2643	7.83931	16.1133	22.7831	0
190	1	60.2208	8.42698	10.0799	21.2723	0
191	1	52.4642	10.1682	8.46635	28.9013	0
192	1	75.4749	2.6093	4.79142	17.1244	0
193	1	9.22572	11.6789	36.4583	42.6371	0
194	1	56.5002	15.0367	13.1326	15.3305	0
195	1	33.696	16.3807	30.0891	19.8341	0
196	1	51.4194	16.5612	8.5013	23.5181	0
197	1	81.9593	1.04627	5.49334	11.5011	0
198	1	30.8062	20.7834	21.8572	26.5532	0
199	1	74.5462	3.79505	3.49418	18.1645	0
200	1	15.6841	42.3459	28.1629	13.8071	0

## Sheet: Conc Profiles CSys(CPlasma)
Summary Statistics			Mean
	From (h)	To (h)	TMax (h)	CMax (µg/mL)	AUC (µg/mL.h)
CPlasma (µg/mL)	0	0.0166667	0.00426875	19.916	0.204861
Population Statistics
Time (h)			0	0.00326875	0.00426875	0.00677421	0.00977421	0.0117742	0.0137742	0.0157742	0.0166667	0.0186667	0.0206667	0.0226667	0.0246667	0.0266667	0.0286667	0.0306667	0.0326667	0.0346667	0.0366667	0.0386667	0.0406667	0.0426667	0.0446667	0.0466667	0.0486667	0.0506667	0.0526667	0.0546667	0.0566667	0.0586667	0.0606667	0.0626667	0.0646667	0.0666667	0.0686667	0.0706667	0.0726667	0.0746667	0.0766667	0.0786667	0.0806667	0.0826667	0.0846667	0.0866667	0.0886667	0.0906667	0.0926667
CSys Mean (µg/mL)			0	16.2859	19.916	17.6757	12.8565	10.6869	9.07664	7.85693	7.85693	7.14109	6.56426	6.08469	5.67605	5.3216	5.01045	4.73527	4.49083	4.2732	4.07924	3.90634	3.75224	3.61497	3.49275	3.384	3.28731	3.20138	3.12509	3.05739	2.99737	2.94421	2.89717	2.8556	2.8189	2.78655	2.75809	2.7331	2.7112	2.69207	2.6754	2.66094	2.64844	2.6377	2.62853	2.62076	2.61423	2.60883	2.60442
CSys 95th percentile			0	18.2363	22.3063	19.9047	14.6191	12.2	10.3829	9.00401	9.00401	8.15119	7.53847	6.99667	6.52055	6.13795	5.79	5.49004	5.22867	4.99292	4.77887	4.57824	4.3991	4.23897	4.09627	3.96917	3.85608	3.75274	3.6591	3.57544	3.50195	3.4355	3.37634	3.32373	3.27706	3.23678	3.20102	3.16933	3.14132	3.11589	3.09195	3.07345	3.05683	3.04044	3.02632	3.01566	3.00664	2.99911	2.99424
CSys 5th percentile			0	14.3467	17.5353	15.5078	11.1815	9.22045	7.82377	6.76851	6.76851	6.1843	5.65987	5.22834	4.86233	4.5735	4.32116	4.07965	3.8641	3.66826	3.49553	3.34334	3.2083	3.08605	2.97691	2.88222	2.80079	2.72758	2.6617	2.60331	2.55518	2.51156	2.47013	2.43353	2.40149	2.37352	2.34897	2.33138	2.3176	2.30596	2.2964	2.28843	2.2762	2.26532	2.26097	2.25263	2.24249	2.23354	2.22567
Individual Statistics
Type	Individual	Trial
Time (h)			0	0.00326875	0.00426875	0.00677421	0.00977421	0.0117742	0.0137742	0.0157742	0.0166667	0.0186667	0.0206667	0.0226667	0.0246667	0.0266667	0.0286667	0.0306667	0.0326667	0.0346667	0.0366667	0.0386667	0.0406667	0.0426667	0.0446667	0.0466667	0.0486667	0.0506667	0.0526667	0.0546667	0.0566667	0.0586667	0.0606667	0.0626667	0.0646667	0.0666667	0.0686667	0.0706667	0.0726667	0.0746667	0.0766667	0.0786667	0.0806667	0.0826667	0.0846667	0.0866667	0.0886667	0.0906667	0.0926667
CSys (µg/mL)	1	1	0	14.0892	17.2555	15.0002	10.4394	8.51335	7.14119	6.13215	6.13215	5.57236	5.11844	4.73652	4.40734	4.11959	3.86622	3.64243	3.44458	3.26971	3.11528	2.97903	2.85892	2.75313	2.66005	2.57819	2.50628	2.44315	2.38778	2.33926	2.2968	2.25967	2.22726	2.19902	2.17445	2.15313	2.13468	2.11876	2.10507	2.09336	2.08338	2.07495	2.06788	2.06201	2.0572	2.05332	2.05028	2.04796	2.0463
CSys (µg/mL)	2	1	0	15.305	18.6933	16.7472	12.4477	10.4564	8.95272	7.79953	7.79953	7.10906	6.55346	6.09301	5.70168	5.36245	5.0641	4.79911	4.56228	4.34982	4.15887	3.98709	3.83255	3.69356	3.56861	3.45635	3.35557	3.26515	3.18408	3.11146	3.04644	2.98829	2.93632	2.88992	2.84853	2.81166	2.77885	2.74971	2.72385	2.70096	2.68074	2.66292	2.64725	2.63353	2.62155	2.61115	2.60216	2.59443	2.58785
CSys (µg/mL)	3	1	0	17.7067	21.6565	19.3743	14.2928	11.9036	10.078	8.66443	8.66443	7.79845	7.10087	6.52599	6.0429	5.6306	5.27461	4.9647	4.69344	4.45522	4.24561	4.06101	3.89842	3.75524	3.62923	3.51842	3.42107	3.33561	3.2607	3.1951	3.13774	3.08767	3.04403	3.00608	2.97316	2.94467	2.92011	2.899	2.88095	2.8656	2.85263	2.84177	2.83276	2.82539	2.81947	2.81483	2.81132	2.8088	2.80716
CSys (µg/mL)	4	1	0	14.5321	17.7014	15.7763	11.6438	9.7364	8.30242	7.20955	7.20955	6.56114	6.04449	5.62036	5.26276	4.95459	4.68456	4.44513	4.23117	4.03901	3.86595	3.70985	3.56899	3.44188	3.32721	3.22382	3.13067	3.04679	2.97132	2.90346	2.84249	2.78777	2.73869	2.69471	2.65535	2.62015	2.58873	2.56072	2.53578	2.51363	2.49398	2.47662	2.4613	2.44783	2.43605	2.42577	2.41686	2.40919	2.40263
CSys (µg/mL)	5	1	0	17.7894	21.6624	19.2199	14.0737	11.6963	9.90606	8.53934	8.53934	7.72272	7.07114	6.53661	6.08723	5.70187	5.36637	5.07115	4.8095	4.57655	4.3686	4.18272	4.01647	3.86778	3.73484	3.61603	3.50992	3.4152	3.3307	3.25539	3.18831	3.12861	3.07552	3.02835	2.9865	2.9494	2.91655	2.88752	2.8619	2.83934	2.81952	2.80214	2.78696	2.77375	2.76229	2.7524	2.74392	2.73671	2.73062
CSys (µg/mL)	6	1	0	18.0029	21.9437	19.3779	14.4218	12.0945	10.3223	8.95649	8.95649	8.13287	7.47353	6.93178	6.47598	6.08486	5.74401	5.4436	5.17675	4.93851	4.72515	4.53376	4.36194	4.20766	4.06918	3.94494	3.83354	3.73372	3.64435	3.5644	3.49294	3.42913	3.37221	3.32149	3.27635	3.23623	3.20063	3.1691	3.14122	3.11664	3.09501	3.07605	3.05948	3.04507	3.03259	3.02186	3.01269	3.00493	2.99844
CSys (µg/mL)	7	1	0	17.027	20.8494	18.5122	13.5345	11.2345	9.49782	8.16563	8.16563	7.36451	6.72038	6.18914	5.74169	5.35874	5.02721	4.73799	4.48447	4.26162	4.06546	3.89271	3.74059	3.6067	3.48891	3.38537	3.29444	3.21465	3.14471	3.08346	3.0299	2.98312	2.94233	2.90681	2.87596	2.84923	2.82612	2.80622	2.78913	2.77455	2.76216	2.7517	2.74297	2.73574	2.72984	2.72512	2.72143	2.71866	2.7167
CSys (µg/mL)	8	1	0	15.5153	19.0105	16.8513	12.333	10.2745	8.73378	7.55829	7.55829	6.86069	6.2969	5.82766	5.42797	5.08181	4.77865	4.51132	4.27467	4.06479	3.87854	3.71327	3.5667	3.43681	3.32181	3.22008	3.13018	3.05081	2.98082	2.91918	2.86495	2.81732	2.77556	2.739	2.70707	2.67926	2.6551	2.63419	2.61616	2.60069	2.5875	2.57633	2.56695	2.55917	2.5528	2.54769	2.54369	2.54069	2.53856
CSys (µg/mL)	9	1	0	18.198	22.2152	19.5707	14.2263	11.811	10.0175	8.66145	8.66145	7.8685	7.23334	6.70801	6.26196	5.87572	5.53668	5.23647	4.96925	4.73071	4.51751	4.3269	4.1565	4.00425	3.8683	3.747	3.63884	3.54246	3.45666	3.38032	3.31247	3.25221	3.19875	3.15137	3.10943	3.07236	3.03965	3.01084	2.98551	2.9633	2.94388	2.92696	2.91227	2.89958	2.88867	2.87937	2.87149	2.86489	2.85943
CSys (µg/mL)	10	1	0	19.049	23.2773	20.4503	14.8406	12.3352	10.4893	9.10088	9.10088	8.29941	7.65574	7.12053	6.66313	6.26446	5.91245	5.59919	5.31919	5.06841	4.84363	4.64217	4.46169	4.30012	4.15557	4.02635	3.91093	3.80789	3.71599	3.63408	3.56113	3.49623	3.43853	3.3873	3.34187	3.30164	3.26607	3.23467	3.20701	3.18271	3.16142	3.14282	3.12665	3.11263	3.10056	3.09023	3.08146	3.07408	3.06796
CSys (µg/mL)	11	1	0	16.7684	20.5103	18.246	13.4386	11.2428	9.59916	8.34668	8.34668	7.60592	7.00933	6.51369	6.09133	5.72452	5.40176	5.11535	4.85994	4.63158	4.42716	4.24415	4.08034	3.93381	3.80283	3.68584	3.58143	3.48832	3.40536	3.33152	3.26584	3.2075	3.15572	3.10982	3.0692	3.0333	3.00164	2.97377	2.9493	2.92787	2.90917	2.89291	2.87883	2.86672	2.85635	2.84756	2.84018	2.83405	2.82905
CSys (µg/mL)	12	1	0	15.5621	19.0686	17.0702	12.2898	10.1574	8.58145	7.38937	7.38937	6.68752	6.11883	5.64373	5.23779	4.88565	4.57733	4.30594	4.06643	3.85484	3.66789	3.50275	3.35696	3.22833	3.11491	3.01494	2.92689	2.84936	2.78114	2.72114	2.6684	2.62206	2.58138	2.54569	2.5144	2.48701	2.46304	2.44211	2.42384	2.40794	2.39412	2.38214	2.37179	2.36286	2.3552	2.34866	2.3431	2.33842	2.3345
CSys (µg/mL)	13	1	0	18.0467	22.1165	19.8156	14.6665	12.2584	10.4235	9.00398	9.00398	8.13856	7.43873	6.8589	6.36876	5.948	5.58277	5.26334	4.98265	4.73529	4.51701	4.32426	4.15406	4.00383	3.8713	3.75444	3.6515	3.56088	3.48117	3.41113	3.34965	3.29574	3.24852	3.20723	3.17118	3.13975	3.11242	3.08871	3.06819	3.0505	3.03531	3.02232	3.01128	3.00197	2.99417	2.98772	2.98246	2.97824	2.97494
CSys (µg/mL)	14	1	0	16.2772	19.9144	17.4322	12.3082	10.1561	8.63228	7.51774	7.51774	6.90956	6.41553	5.99623	5.6298	5.30396	5.01158	4.74812	4.51039	4.29587	4.10238	3.92797	3.77084	3.62934	3.50196	3.38731	3.28412	3.19124	3.10764	3.03238	2.96462	2.90361	2.84865	2.79915	2.75454	2.71434	2.67811	2.64543	2.61597	2.58939	2.5654	2.54375	2.52421	2.50656	2.49061	2.47621	2.46318	2.45141	2.44076
CSys (µg/mL)	15	1	0	15.1832	18.5676	16.5305	12.16	10.1449	8.62652	7.46356	7.46356	6.7673	6.20685	5.7429	5.34975	5.0106	4.71427	4.45315	4.22183	4.01631	3.83343	3.67062	3.52568	3.39672	3.28205	3.18017	3.08971	3.00948	2.93838	2.87544	2.81977	2.77061	2.72724	2.68905	2.65546	2.62598	2.60017	2.57763	2.55799	2.54096	2.52623	2.51357	2.50275	2.49356	2.48583	2.4794	2.47413	2.46989	2.46657
CSys (µg/mL)	16	1	0	15.2398	18.555	16.3693	12.1873	10.2356	8.75716	7.62345	7.62345	6.94682	6.40685	5.96353	5.58996	5.26823	4.9864	4.73645	4.51287	4.31179	4.13036	3.96635	3.818	3.68378	3.56238	3.45264	3.3535	3.26399	3.18324	3.11045	3.0449	2.98591	2.93287	2.88524	2.8425	2.80421	2.76995	2.73933	2.71202	2.68771	2.66611	2.64697	2.63007	2.61518	2.60212	2.59072	2.58081	2.57227	2.56496
CSys (µg/mL)	17	1	0	15.9141	19.4782	17.3695	12.772	10.6311	9.00557	7.75265	7.75265	6.99237	6.37963	5.8735	5.44673	5.08111	4.76426	4.48751	4.24457	4.03068	3.84209	3.67571	3.52892	3.39948	3.28541	3.18496	3.09658	3.01891	2.95073	2.89094	2.83858	2.79279	2.75283	2.71801	2.68775	2.66151	2.63882	2.61928	2.60252	2.58822	2.57609	2.56588	2.55737	2.55036	2.54466	2.54014	2.53666	2.53408	2.53231
CSys (µg/mL)	18	1	0	15.5414	19.0161	16.9121	12.4586	10.4301	8.91448	7.76074	7.76074	7.08038	6.53192	6.07554	5.6859	5.34686	5.048	4.78239	4.54521	4.3329	4.14266	3.97217	3.81946	3.68274	3.56045	3.45114	3.35353	3.26645	3.18882	3.11969	3.05819	3.00354	2.95505	2.91207	2.87404	2.84045	2.81085	2.78482	2.762	2.74205	2.72469	2.70963	2.69665	2.68553	2.67607	2.66812	2.6615	2.65608	2.65175
CSys (µg/mL)	19	1	0	17.7096	21.6412	19.2485	14.0958	11.6957	9.87519	8.47543	8.47543	7.62822	6.94919	6.39157	5.924	5.52533	5.18113	4.88133	4.61867	4.38768	4.18413	4.00456	3.84609	3.70625	3.5829	3.47415	3.37833	3.29396	3.21973	3.15447	3.09715	3.04685	3.00275	2.96415	2.93039	2.90091	2.87523	2.85289	2.8335	2.81672	2.80225	2.78982	2.77919	2.77014	2.7625	2.7561	2.7508	2.74645	2.74297
CSys (µg/mL)	20	1	0	14.2857	17.4545	15.5088	11.0667	9.10367	7.6664	6.59073	6.59073	5.9693	5.47105	5.05794	4.70644	4.40188	4.13487	3.89913	3.6902	3.50469	3.33988	3.19348	3.06347	2.94811	2.84579	2.75512	2.67482	2.60376	2.54091	2.48537	2.43633	2.39307	2.35495	2.32139	2.29188	2.26598	2.24328	2.22342	2.20609	2.19101	2.17792	2.16661	2.15688	2.14854	2.14145	2.13546	2.13045	2.12632	2.12297
CSys (µg/mL)	21	1	0	16.9284	20.7052	18.4209	13.2083	10.9266	9.26529	8.02486	8.02486	7.31439	6.74069	6.26027	5.84707	5.48533	5.16524	4.88034	4.62606	4.39891	4.196	4.01485	3.85323	3.70917	3.58086	3.46666	3.3651	3.27484	3.19469	3.12357	3.06052	3.00467	2.95527	2.9116	2.87307	2.83912	2.80925	2.78304	2.76009	2.74004	2.7226	2.70747	2.69442	2.68322	2.67366	2.66559	2.65882	2.65324	2.6487
CSys (µg/mL)	22	1	0	17.3511	21.2841	19.2869	14.0619	11.6707	9.87386	8.49817	8.49817	7.66956	6.99982	6.44401	5.97315	5.56829	5.21669	4.90945	4.64002	4.40331	4.19522	4.01227	3.85149	3.71028	3.58632	3.4776	3.38231	3.29885	3.22581	3.16195	3.10617	3.05749	3.01506	2.97813	2.94603	2.91818	2.89407	2.87324	2.8553	2.8399	2.82673	2.81553	2.80604	2.79807	2.79143	2.78596	2.78152	2.77797	2.77522
CSys (µg/mL)	23	1	0	15.6937	19.2396	17.0849	12.4826	10.3539	8.74394	7.50623	7.50623	6.75891	6.15643	5.65866	5.2392	4.88047	4.57048	4.30077	4.06513	3.8588	3.67793	3.51936	3.38036	3.25861	3.15203	3.05883	2.97742	2.90639	2.84448	2.79062	2.74382	2.70323	2.66812	2.6378	2.61171	2.58932	2.5702	2.55395	2.54021	2.52868	2.5191	2.51122	2.50485	2.49979	2.49589	2.49301	2.49103	2.48983	2.48932
CSys (µg/mL)	24	1	0	15.5831	19.0871	16.9845	12.5218	10.4909	8.9729	7.816	7.816	7.1328	6.58036	6.11933	5.72485	5.38116	5.07806	4.80877	4.56851	4.35372	4.16156	3.98966	3.83596	3.69864	3.57606	3.46673	3.36931	3.28258	3.20546	3.13695	3.07615	3.02227	2.9746	2.93247	2.89532	2.86262	2.83392	2.80879	2.78686	2.76779	2.7513	2.7371	2.72495	2.71465	2.706	2.69883	2.69298	2.68831	2.6847
CSys (µg/mL)	25	1	0	17.683	21.6566	19.2927	14.174	11.8003	10.0026	8.61909	8.61909	7.78264	7.10771	6.54908	6.07697	5.67164	5.31972	5.01191	4.74144	4.50318	4.29305	4.10764	3.9441	3.79991	3.67288	3.56106	3.46272	3.37631	3.30048	3.234	3.17579	3.12491	3.08049	3.04179	3.00814	2.97896	2.95373	2.93198	2.91331	2.89736	2.88382	2.8724	2.86285	2.85495	2.84852	2.84337	2.83937	2.83637	2.83425
CSys (µg/mL)	26	1	0	16.6918	20.4037	18.2482	13.485	11.2607	9.57012	8.26697	8.26697	7.4766	6.8407	6.31593	5.87334	5.49353	5.16335	4.87372	4.61813	4.39172	4.19075	4.01215	3.85338	3.71225	3.58682	3.47539	3.37646	3.28867	3.2108	3.14178	3.08063	3.0265	2.97861	2.93627	2.89887	2.86587	2.83677	2.81114	2.78861	2.76881	2.75146	2.73628	2.72303	2.71148	2.70147	2.6928	2.68533	2.67893	2.67348
CSys (µg/mL)	27	1	0	15.1743	18.5264	16.581	12.3232	10.3621	8.8877	7.76146	7.76146	7.09292	6.55595	6.11094	5.73215	5.4029	5.11237	4.85337	4.62102	4.41182	4.2231	4.05276	3.899	3.76028	3.6352	3.52252	3.42109	3.32986	3.24789	3.17431	3.10832	3.0492	2.9963	2.94903	2.90685	2.86927	2.83585	2.8062	2.77994	2.75676	2.73635	2.71846	2.70284	2.68927	2.67755	2.66751	2.65898	2.65182	2.6459
CSys (µg/mL)	28	1	0	16.9689	20.6586	18.0209	12.9824	10.762	9.14773	7.9518	7.9518	7.28192	6.75215	6.31605	5.94482	5.62077	5.33296	5.07452	4.84096	4.62916	4.43681	4.26205	4.10332	3.9592	3.82843	3.70986	3.60242	3.50513	3.41707	3.33743	3.26545	3.20042	3.14173	3.08879	3.04108	2.99812	2.95948	2.92477	2.89362	2.86571	2.84075	2.81846	2.7986	2.78095	2.76531	2.7515	2.73934	2.72868	2.71939
CSys (µg/mL)	29	1	0	15.7637	19.35	17.1737	12.2638	10.1265	8.56938	7.40138	7.40138	6.7276	6.17756	5.71358	5.31356	4.96411	4.6567	4.38538	4.14566	3.9339	3.74695	3.58205	3.43673	3.30877	3.19619	3.09723	3.01031	2.93402	2.86712	2.80852	2.75724	2.71242	2.6733	2.63922	2.60958	2.58386	2.5616	2.5424	2.5259	2.51178	2.49976	2.4896	2.48107	2.474	2.4682	2.46353	2.45986	2.45707	2.45505
CSys (µg/mL)	30	1	0	16.8631	20.6475	18.3676	13.4734	11.2107	9.50143	8.18918	8.18918	7.39946	6.76334	6.23739	5.79309	5.41158	5.08014	4.78996	4.53468	4.30946	4.11049	3.93461	3.77915	3.64179	3.52047	3.41338	3.31893	3.23566	3.16233	3.09777	3.041	2.99112	2.94733	2.90893	2.8753	2.84588	2.8202	2.79781	2.77834	2.76145	2.74684	2.73424	2.72342	2.71417	2.70632	2.69969	2.69415	2.68957	2.68583
CSys (µg/mL)	31	1	0	16.7441	20.4567	17.8778	12.8722	10.6469	9.0118	7.78462	7.78462	7.07783	6.51041	6.03895	5.63659	5.28663	4.97846	4.70509	4.46159	4.24431	4.0503	3.87708	3.72252	3.58468	3.46185	3.35247	3.25513	3.16858	3.09167	3.02338	2.96279	2.90909	2.86152	2.81944	2.78227	2.74946	2.72056	2.69514	2.67284	2.65331	2.63626	2.62142	2.60856	2.59747	2.58794	2.57982	2.57296	2.56721	2.56246
CSys (µg/mL)	32	1	0	16.9558	20.7751	18.5275	13.337	11.0684	9.41478	8.17591	8.17591	7.46321	6.88316	6.39395	5.9709	5.59925	5.26981	4.97647	4.71482	4.48135	4.27312	4.08756	3.92234	3.77537	3.64474	3.52872	3.42577	3.33448	3.25359	3.182	3.11868	3.06274	3.01339	2.96991	2.93165	2.89806	2.86862	2.84289	2.82046	2.80098	2.78413	2.76961	2.75718	2.74661	2.7377	2.73027	2.72416	2.71923	2.71534
CSys (µg/mL)	33	1	0	15.1164	18.4108	16.3805	12.0716	10.0932	8.61199	7.48742	7.48742	6.82548	6.29915	5.86735	5.50309	5.18871	4.91269	4.66741	4.44769	4.2499	4.07136	3.90997	3.76401	3.63202	3.51271	3.40491	3.30757	3.21974	3.14055	3.06918	3.00493	2.94711	2.89513	2.84843	2.80653	2.76896	2.73532	2.70523	2.67836	2.6544	2.63308	2.61414	2.59736	2.58254	2.56949	2.55804	2.54804	2.53935	2.53184
CSys (µg/mL)	34	1	0	16.5234	20.2341	18.0109	12.9593	10.7696	9.18331	8.00069	8.00069	7.32798	6.78017	6.31668	5.91394	5.55816	5.24097	4.95691	4.7021	4.47349	4.2685	4.08485	3.92047	3.77347	3.64211	3.52483	3.42019	3.3269	3.24378	3.16977	3.10395	3.04545	2.99351	2.94745	2.90666	2.87059	2.83875	2.8107	2.78603	2.76441	2.74551	2.72905	2.71478	2.70246	2.69189	2.6829	2.67532	2.66899	2.6638
CSys (µg/mL)	35	1	0	16.1367	19.7637	17.6575	13.0119	10.8421	9.19061	7.91468	7.91468	7.1375	6.51022	5.99164	5.55431	5.17979	4.85546	4.57247	4.32433	4.10615	3.914	3.74469	3.59551	3.4641	3.34842	3.24667	3.15724	3.07872	3.00984	2.94949	2.89667	2.85052	2.81025	2.77518	2.7447	2.71826	2.69541	2.67571	2.65879	2.64434	2.63205	2.62168	2.613	2.6058	2.59992	2.5952	2.5915	2.5887	2.5867
CSys (µg/mL)	36	1	0	16.7278	20.3931	18.0627	13.2734	11.1145	9.51701	8.31318	8.31318	7.61681	7.05985	6.598	6.20328	5.85813	5.5515	5.27631	5.02782	4.80272	4.59852	4.4132	4.24506	4.09257	3.95437	3.82922	3.71595	3.61352	3.52095	3.43735	3.36191	3.29388	3.23259	3.17741	3.12779	3.08321	3.04321	3.00737	2.97531	2.94668	2.92115	2.89845	2.87832	2.86051	2.84482	2.83105	2.81902	2.80856	2.79955
CSys (µg/mL)	37	1	0	16.9914	20.7462	18.5339	13.6475	11.349	9.59361	8.23633	8.23633	7.40577	6.73891	6.19115	5.73213	5.34115	5.00394	4.71044	4.45342	4.22743	4.02826	3.85251	3.69737	3.56041	3.43957	3.33302	3.23913	3.15649	3.08382	3.01998	2.96398	2.91493	2.87202	2.83456	2.80192	2.77354	2.74895	2.7277	2.7094	2.69373	2.68037	2.66907	2.65957	2.65168	2.64521	2.64	2.6359	2.63277	2.63052
CSys (µg/mL)	38	1	0	15.3957	18.8531	16.7764	12.3074	10.2382	8.67272	7.46914	7.46914	6.74254	6.1565	5.67157	5.26181	4.91003	4.6046	4.33743	4.10267	3.89583	3.71339	3.5524	3.41036	3.28512	3.17477	3.07762	2.99217	2.91709	2.8512	2.79344	2.74288	2.69868	2.66011	2.62653	2.59735	2.57207	2.55022	2.53142	2.51531	2.50157	2.48993	2.48015	2.472	2.46531	2.45989	2.4556	2.45232	2.44991	2.44828
CSys (µg/mL)	39	1	0	14.6868	18.0015	15.7328	10.9918	8.95805	7.4924	6.40453	6.40453	5.78783	5.28803	4.86942	4.51108	4.20034	3.92902	3.69137	3.48303	3.30041	3.14044	3.00043	2.87801	2.77105	2.67768	2.59623	2.52523	2.46339	2.40959	2.36281	2.32218	2.28694	2.25641	2.23002	2.20724	2.18762	2.17078	2.15636	2.14407	2.13363	2.12483	2.11745	2.11132	2.10629	2.10221	2.09898	2.09648	2.09463	2.09334
CSys (µg/mL)	40	1	0	16.4503	20.1062	17.8337	12.7006	10.4421	8.7933	7.56201	7.56201	6.85418	6.28654	5.81552	5.41438	5.06656	4.76151	4.49217	4.25353	4.04177	3.85378	3.68694	3.53894	3.40777	3.29159	3.18877	3.09785	3.01751	2.94658	2.88402	2.8289	2.78038	2.73772	2.70028	2.66747	2.63876	2.61371	2.5919	2.57296	2.55658	2.54248	2.53039	2.52009	2.51139	2.5041	2.49806	2.49315	2.48922	2.48617
CSys (µg/mL)	41	1	0	16.694	20.4123	18.0383	13.1104	10.848	9.14852	7.85133	7.85133	7.07727	6.45682	5.94599	5.51595	5.1477	4.82852	4.5496	4.30462	4.08884	3.89848	3.73048	3.5822	3.45138	3.33604	3.23441	3.14492	3.0662	2.997	2.93623	2.88291	2.83617	2.79527	2.7595	2.72828	2.70108	2.67743	2.65691	2.63915	2.62385	2.6107	2.59946	2.5899	2.58182	2.57507	2.56947	2.56489	2.56121	2.55834
CSys (µg/mL)	42	1	0	13.9548	17.0356	15.063	11.0152	9.1839	7.82461	6.79781	6.79781	6.19997	5.72208	5.32706	4.9913	4.69977	4.44285	4.21422	4.00957	3.82579	3.66052	3.51183	3.37807	3.25781	3.14976	3.05275	2.96573	2.88773	2.81788	2.75537	2.69949	2.64959	2.60507	2.5654	2.53011	2.49875	2.47093	2.44631	2.42457	2.40542	2.3886	2.37389	2.36106	2.34994	2.34036	2.33215	2.32519	2.31935	2.31452
CSys (µg/mL)	43	1	0	15.0039	18.3826	16.0698	11.2367	9.16522	7.67454	6.57014	6.57014	5.94663	5.44226	5.02011	4.65859	4.34467	4.07002	3.82887	3.61687	3.4305	3.26676	3.12302	2.99695	2.88648	2.78975	2.70513	2.63116	2.56656	2.51019	2.46106	2.41828	2.38109	2.3488	2.32082	2.29663	2.27576	2.25781	2.24242	2.22929	2.21815	2.20874	2.20086	2.19433	2.18898	2.18466	2.18126	2.17867	2.17678	2.17551
CSys (µg/mL)	44	1	0	14.7845	18.0656	16.0193	11.7447	9.79664	8.34156	7.23545	7.23545	6.58314	6.05917	5.62489	5.25553	4.93518	4.65352	4.40367	4.18084	3.98154	3.80304	3.64309	3.49979	3.37146	3.2566	3.15387	3.06204	2.98	2.90677	2.84144	2.78319	2.73129	2.68509	2.64399	2.60746	2.57504	2.54628	2.52081	2.49828	2.47839	2.46086	2.44544	2.43191	2.42008	2.40976	2.4008	2.39305	2.38639	2.3807
CSys (µg/mL)	45	1	0	15.3574	18.7304	16.7461	12.4142	10.4109	8.90195	7.74924	7.74924	7.06362	6.51571	6.06463	5.68341	5.35429	5.06556	4.80938	4.58038	4.37473	4.18956	4.02261	3.87201	3.73617	3.61369	3.50331	3.40389	3.3144	3.23391	3.16155	3.09656	3.03824	2.98593	2.93906	2.89711	2.8596	2.82611	2.79624	2.76964	2.746	2.72503	2.70648	2.6901	2.67569	2.66305	2.65202	2.64243	2.63416	2.62707
CSys (µg/mL)	46	1	0	15.216	18.6258	16.6323	12.2673	10.2386	8.69987	7.51408	7.51408	6.79567	6.21528	5.73413	5.32663	4.97586	4.67038	4.40229	4.16587	3.95681	3.77169	3.60772	3.46249	3.33393	3.22021	3.1197	3.03095	2.95266	2.88368	2.82298	2.76962	2.7228	2.68178	2.6459	2.6146	2.58735	2.5637	2.54325	2.52563	2.51053	2.49765	2.48676	2.47762	2.47004	2.46383	2.45886	2.45496	2.45203	2.44995
CSys (µg/mL)	47	1	0	15.4615	18.9049	16.8644	12.4647	10.4441	8.92576	7.76502	7.76502	7.07412	6.51705	6.05405	5.65947	5.31676	5.01513	4.74736	4.5084	4.29457	4.10298	3.93126	3.77739	3.63961	3.51631	3.40607	3.30759	3.2197	3.14133	3.07152	3.00941	2.9542	2.9052	2.86177	2.82333	2.78938	2.75946	2.73314	2.71007	2.68989	2.67233	2.6571	2.64397	2.63272	2.62316	2.6151	2.60841	2.60292	2.59853
CSys (µg/mL)	48	1	0	16.807	20.5461	18.075	13.0906	10.8334	9.15304	7.87862	7.87862	7.1284	6.5261	6.02797	5.60605	5.24236	4.92506	4.64611	4.39975	4.18166	3.98838	3.81705	3.66522	3.53073	3.41169	3.3064	3.21333	3.13115	3.05863	2.99471	2.93841	2.88889	2.84539	2.80722	2.77379	2.74456	2.71907	2.69689	2.67764	2.66101	2.64669	2.63443	2.62399	2.61517	2.60779	2.60168	2.5967	2.59273	2.58966
CSys (µg/mL)	49	1	0	16.3999	20.1147	17.5259	12.2884	10.1005	8.5493	7.40833	7.40833	6.77873	6.26126	5.81943	5.43344	5.09219	4.78894	4.51904	4.27892	4.06551	3.87608	3.70813	3.55939	3.42778	3.31143	3.20864	3.11792	3.03789	2.96737	2.90527	2.85066	2.80269	2.7606	2.72374	2.69152	2.66341	2.63895	2.61773	2.59939	2.58359	2.57007	2.55855	2.54881	2.54066	2.53392	2.52843	2.52404	2.52064	2.51811
CSys (µg/mL)	50	1	0	15.5779	18.9958	16.4225	11.6712	9.59711	8.09569	6.98501	6.98501	6.36346	5.86906	5.46027	5.11178	4.80816	4.53987	4.30077	4.08668	3.89457	3.72206	3.56714	3.42809	3.30337	3.19158	3.09145	3.00182	2.92166	2.85002	2.78603	2.72892	2.67801	2.63265	2.59229	2.55641	2.52456	2.49634	2.47136	2.44931	2.42987	2.4128	2.39784	2.38478	2.37342	2.36361	2.35517	2.34796	2.34187	2.33677
CSys (µg/mL)	51	1	0	17.0956	20.903	18.5081	13.2202	10.9384	9.29409	8.07657	8.07657	7.39236	6.83988	6.37557	5.97399	5.62018	5.30507	5.02285	4.76948	4.54186	4.33744	4.15397	3.98943	3.84201	3.71001	3.59191	3.48632	3.39197	3.30773	3.23255	3.16552	3.10579	3.05263	3.00535	2.96335	2.92608	2.89307	2.86387	2.83809	2.81538	2.79543	2.77794	2.76268	2.7494	2.73791	2.72802	2.71957	2.71241	2.7064
CSys (µg/mL)	52	1	0	15.0934	18.4992	16.506	12.194	10.2143	8.72428	7.58138	7.58138	6.89749	6.34277	5.87958	5.48382	5.13998	4.83789	4.57063	4.33323	4.12196	3.93381	3.76627	3.61716	3.48455	3.36674	3.26216	3.16942	3.08729	3.01462	2.95041	2.89375	2.84384	2.79994	2.76141	2.72766	2.69819	2.67253	2.65027	2.63104	2.61451	2.60039	2.58841	2.57836	2.57001	2.56318	2.55771	2.55345	2.55027	2.54804
CSys (µg/mL)	53	1	0	18.1976	22.2952	19.854	14.304	11.9053	10.1711	8.87992	8.87992	8.1487	7.55277	7.04775	6.60807	6.21887	5.87119	5.55924	5.27889	5.02691	4.80054	4.59735	4.4151	4.25177	4.10549	3.97455	3.8574	3.75265	3.65902	3.57537	3.50067	3.434	3.37453	3.32152	3.27429	3.23226	3.19488	3.16167	3.13221	3.10609	3.08299	3.06258	3.04458	3.02875	3.01487	3.00272	2.99214	2.98296	2.97503
CSys (µg/mL)	54	1	0	14.8264	18.1606	16.1506	11.8751	9.91792	8.44864	7.32494	7.32494	6.65531	6.11385	5.66304	5.27885	4.9458	4.65373	4.39574	4.16688	3.96345	3.78246	3.62145	3.47828	3.35105	3.23809	3.13789	3.0491	2.9705	2.901	2.83961	2.78546	2.73777	2.69583	2.65902	2.62678	2.5986	2.57406	2.55275	2.53432	2.51845	2.50486	2.49331	2.48357	2.47544	2.46875	2.46334	2.45907	2.45581	2.45346
CSys (µg/mL)	55	1	0	16.6175	20.3843	17.9252	12.641	10.3654	8.71999	7.49392	7.49392	6.79485	6.22579	5.74696	5.33521	4.97659	4.66217	4.38571	4.14244	3.92844	3.74034	3.57515	3.43022	3.30318	3.19192	3.09455	3.00941	2.93503	2.8701	2.81348	2.76416	2.72126	2.684	2.65168	2.62372	2.59958	2.5788	2.56097	2.54574	2.53278	2.52183	2.51264	2.505	2.49872	2.49364	2.48961	2.4865	2.48421	2.48264
CSys (µg/mL)	56	1	0	16.0337	19.6952	17.4017	12.3966	10.2547	8.70885	7.55473	7.55473	6.89744	6.35606	5.89451	5.49254	5.13838	4.82467	4.54627	4.29919	4.0801	3.88601	3.71426	3.56243	3.42831	3.30993	3.20551	3.11348	3.0324	2.96104	2.89828	2.84312	2.79469	2.75223	2.71504	2.68251	2.65412	2.62938	2.60788	2.58924	2.57314	2.55928	2.5474	2.53728	2.52871	2.52152	2.51555	2.51065	2.50671	2.50361
CSys (µg/mL)	57	1	0	15.7362	19.2755	17.0992	12.2152	10.091	8.54812	7.39606	7.39606	6.7368	6.20152	5.75117	5.36274	5.02245	4.72165	4.45458	4.21701	4.00562	3.81759	3.65047	3.50205	3.37035	3.25358	3.15011	3.0585	2.97744	2.90578	2.84246	2.78658	2.73729	2.69388	2.65568	2.62211	2.59267	2.56689	2.54436	2.52472	2.50765	2.49287	2.48012	2.46918	2.45983	2.45192	2.44527	2.43975	2.43522	2.43159
CSys (µg/mL)	58	1	0	16.5684	20.3237	18.092	12.9352	10.661	8.99178	7.73511	7.73511	7.00291	6.4091	5.91237	5.48767	5.11942	4.79746	4.51477	4.26606	4.04714	3.85449	3.68504	3.53613	3.40534	3.29058	3.18994	3.10175	3.02454	2.957	2.89795	2.84639	2.80142	2.76224	2.72816	2.69857	2.67293	2.65075	2.63164	2.61521	2.60115	2.58917	2.57903	2.5705	2.56339	2.55753	2.55277	2.54898	2.54605	2.54387
CSys (µg/mL)	59	1	0	20.2362	24.7378	21.9498	16.1603	13.5496	11.6128	10.1464	10.1464	9.29181	8.60244	8.02667	7.5323	7.09927	6.71493	6.37106	6.06203	5.78371	5.53288	5.30684	5.10325	4.92	4.7552	4.6071	4.47411	4.35478	4.2478	4.15197	4.06619	3.98948	3.92096	3.85981	3.80532	3.75682	3.71372	3.6755	3.64168	3.61181	3.58551	3.56243	3.54225	3.52469	3.50948	3.49639	3.48522	3.47578	3.46789
CSys (µg/mL)	60	1	0	16.1652	19.7858	17.7738	12.853	10.6422	9.00286	7.7616	7.7616	7.02922	6.43859	5.94755	5.52958	5.16787	4.85143	4.57276	4.32647	4.1084	3.91522	3.74409	3.59255	3.45845	3.33985	3.23503	3.14247	3.06078	2.98874	2.92527	2.86939	2.82025	2.77707	2.73919	2.706	2.67697	2.65162	2.62954	2.61036	2.59374	2.57939	2.56706	2.55652	2.54756	2.54001	2.5337	2.5285	2.52428	2.52092
CSys (µg/mL)	61	1	0	15.2714	18.7177	16.6812	11.9388	9.83802	8.2922	7.12671	7.12671	6.44471	5.89217	5.43048	5.03604	4.69411	4.39507	4.13229	3.90084	3.69683	3.51702	3.35858	3.21908	3.09631	2.98834	2.89344	2.81006	2.73685	2.6726	2.61624	2.56684	2.52355	2.48566	2.45251	2.42354	2.39825	2.3762	2.357	2.34031	2.32583	2.3133	2.30248	2.29317	2.28519	2.27838	2.2726	2.26773	2.26366	2.2603
CSys (µg/mL)	62	1	0	16.2288	19.81	17.4494	12.3969	10.238	8.69687	7.56758	7.56758	6.94688	6.45018	6.03488	5.67616	5.35956	5.07648	4.82161	4.59135	4.3831	4.19474	4.02445	3.87061	3.73174	3.60646	3.49353	3.39178	3.30017	3.21774	3.1436	3.07697	3.01713	2.96342	2.91525	2.8721	2.83348	2.79895	2.76812	2.74064	2.71618	2.69445	2.67519	2.65816	2.64316	2.62997	2.61844	2.60839	2.59969	2.59221
CSys (µg/mL)	63	1	0	15.6328	19.1819	17.2668	12.5037	10.3597	8.76581	7.55494	7.55494	6.83698	6.25581	5.77143	5.3588	5.00197	4.69042	4.41687	4.17599	3.96359	3.77622	3.61098	3.46529	3.33692	3.22385	3.12431	3.03672	2.95967	2.89192	2.83237	2.78004	2.73409	2.69374	2.65832	2.62726	2.60003	2.57618	2.55529	2.53702	2.52106	2.50712	2.49497	2.48438	2.47519	2.46721	2.4603	2.45434	2.4492	2.4448
CSys (µg/mL)	64	1	0	16.3154	19.9935	17.6195	12.5162	10.3384	8.77529	7.61723	7.61723	6.96697	6.43617	5.986	5.5945	5.24899	4.94176	4.66768	4.42299	4.20461	4.00987	3.83641	3.68204	3.54479	3.42287	3.31465	3.21866	3.13359	3.05825	2.99159	2.93267	2.88064	2.83475	2.79434	2.75881	2.72763	2.70032	2.67646	2.65568	2.63765	2.62206	2.60865	2.59718	2.58744	2.57924	2.57242	2.56683	2.56233	2.5588
CSys (µg/mL)	65	1	0	18.562	22.7198	20.1832	14.4556	11.9635	10.1552	8.80756	8.80756	8.03971	7.41802	6.89563	6.44483	6.0491	5.69822	5.38547	5.10608	4.85631	4.63308	4.43368	4.25569	4.09692	3.95538	3.82928	3.71698	3.61701	3.52807	3.44897	3.37865	3.31616	3.26067	3.21141	3.16772	3.12899	3.09468	3.06433	3.0375	3.01381	2.99292	2.97453	2.95838	2.94421	2.93181	2.921	2.9116	2.90345	2.89643
CSys (µg/mL)	66	1	0	15.9765	19.5582	17.4732	12.9039	10.7843	9.17938	7.94472	7.94472	7.19997	6.59912	6.10133	5.67971	5.31655	4.99993	4.72165	4.47582	4.25804	4.06482	3.89331	3.74109	3.60605	3.48633	3.38029	3.28644	3.20347	3.13019	3.06554	3.00859	2.95848	2.91447	2.87588	2.84212	2.81264	2.78699	2.76474	2.74551	2.72896	2.71481	2.70278	2.69265	2.68419	2.67723	2.67161	2.66716	2.66377	2.66131
CSys (µg/mL)	67	1	0	17.6758	21.7002	19.2178	13.6904	11.2948	9.55369	8.24928	8.24928	7.49883	6.88508	6.36635	5.91846	5.52686	5.18229	4.87826	4.60983	4.37292	4.16399	3.97992	3.81789	3.67538	3.55015	3.44018	3.34368	3.25906	3.18492	3.12001	3.06323	3.01363	2.97034	2.93262	2.89981	2.87131	2.84663	2.8253	2.80693	2.79116	2.77769	2.76624	2.75658	2.74849	2.74178	2.7363	2.73189	2.72844	2.72581
CSys (µg/mL)	68	1	0	18.5055	22.6335	20.2954	15.0936	12.6815	10.857	9.45489	9.45489	8.61258	7.933	7.36879	6.88895	6.47318	6.1081	5.78464	5.49646	5.23887	5.00826	4.80167	4.61661	4.45089	4.30257	4.16991	4.05133	3.94542	3.85088	3.76657	3.69142	3.6245	3.56497	3.51205	3.46506	3.42339	3.38648	3.35384	3.32503	3.29965	3.27734	3.25779	3.24069	3.22581	3.2129	3.20177	3.19222	3.18409	3.17723
CSys (µg/mL)	69	1	0	15.4505	18.8675	16.8378	12.4195	10.367	8.81374	7.62134	7.62134	6.90358	6.32758	5.85275	5.45213	5.10781	4.80778	4.54381	4.3101	4.10238	3.91736	3.75241	3.60531	3.47415	3.35727	3.25318	3.16055	3.07819	3.00503	2.94011	2.88256	2.8316	2.78653	2.74674	2.71166	2.68079	2.65368	2.62993	2.60919	2.59113	2.57548	2.56196	2.55036	2.54047	2.53211	2.52511	2.51934	2.51465	2.51093
CSys (µg/mL)	70	1	0	18.3326	22.4256	19.7351	14.3083	11.8567	10.0333	8.65014	8.65014	7.83633	7.18087	6.63672	6.17415	5.77417	5.42437	5.11632	4.84397	4.60269	4.3888	4.19919	4.03117	3.88236	3.75066	3.63419	3.53126	3.44036	3.36015	3.28943	3.22713	3.1723	3.1241	3.08178	3.04467	3.01218	2.98379	2.95904	2.93751	2.91884	2.90271	2.88882	2.87693	2.8668	2.85824	2.85107	2.84514	2.8403	2.83642
CSys (µg/mL)	71	1	0	14.5505	17.8141	15.6106	11.3106	9.36636	7.9197	6.82224	6.82224	6.1775	5.65865	5.22839	4.86309	4.54763	4.2721	4.02975	3.81576	3.62644	3.45883	3.31045	3.17916	3.06308	2.96051	2.86997	2.79012	2.71976	2.65783	2.60336	2.55553	2.51356	2.4768	2.44465	2.41659	2.39215	2.37092	2.35252	2.33664	2.32299	2.31131	2.30138	2.293	2.28599	2.28019	2.27546	2.27168	2.26875	2.26655
CSys (µg/mL)	72	1	0	17.8815	21.8132	19.5193	14.4504	12.0826	10.285	8.90223	8.90223	8.0667	7.39715	6.84634	6.38255	5.98454	5.63798	5.33309	5.06296	4.82256	4.60809	4.41648	4.24523	4.09218	3.95546	3.83338	3.72448	3.6274	3.54093	3.46399	3.3956	3.33488	3.28103	3.23333	3.19116	3.15392	3.12112	3.09229	3.06701	3.04492	3.02568	3.00899	2.99459	2.98225	2.97174	2.96287	2.95548	2.94941	2.94452
CSys (µg/mL)	73	1	0	16.1543	19.7893	17.4953	12.716	10.523	8.87428	7.61348	7.61348	6.85933	6.25276	5.75202	5.3299	4.96847	4.65564	4.38298	4.14431	3.93493	3.75106	3.58956	3.44775	3.32331	3.21419	3.11859	3.03491	2.96175	2.89786	2.84213	2.79358	2.75137	2.71472	2.68297	2.65553	2.63189	2.61159	2.59422	2.57944	2.56692	2.55641	2.54766	2.54045	2.5346	2.52995	2.52635	2.52368	2.52182	2.52067
CSys (µg/mL)	74	1	0	17.1561	20.9777	18.7641	13.4841	11.1176	9.36703	8.04527	8.04527	7.26808	6.64357	6.12622	5.68739	5.30884	4.97863	4.68864	4.43299	4.20721	4.00768	3.83135	3.67561	3.53812	3.41684	3.30994	3.21578	3.13291	3.06005	2.99603	2.93985	2.89059	2.84746	2.80975	2.77683	2.74815	2.72322	2.7016	2.68292	2.66682	2.65302	2.64124	2.63126	2.62287	2.61588	2.61013	2.60548	2.6018	2.59899
CSys (µg/mL)	75	1	0	14.2611	17.4044	15.4883	11.4029	9.52378	8.11245	7.03602	7.03602	6.39668	5.88468	5.46226	5.1047	4.79586	4.52515	4.28545	4.07184	3.88076	3.70948	3.55583	3.41797	3.29433	3.18349	3.08422	2.99536	2.9159	2.8449	2.78153	2.72502	2.67469	2.62991	2.59012	2.55482	2.52356	2.49593	2.47156	2.45013	2.43132	2.41489	2.40058	2.38818	2.37751	2.36837	2.36063	2.35413	2.34875	2.34438
CSys (µg/mL)	76	1	0	15.2985	18.6725	16.6944	12.3296	10.2863	8.73211	7.53464	7.53464	6.80809	6.2256	5.74684	5.34459	5.00046	4.70196	4.44044	4.20973	4.0053	3.82367	3.66207	3.51819	3.39007	3.27602	3.17454	3.08429	3.00407	2.93284	2.86962	2.81356	2.7639	2.71995	2.68109	2.64677	2.61652	2.58987	2.56646	2.54592	2.52794	2.51225	2.4986	2.48677	2.47656	2.46779	2.4603	2.45397	2.44866	2.44425
CSys (µg/mL)	77	1	0	16.4496	20.1458	18.0661	13.3952	11.2091	9.54269	8.25291	8.25291	7.46594	6.82911	6.30092	5.85374	5.46911	5.1345	4.84115	4.58272	4.35441	4.15241	3.97361	3.81537	3.67537	3.55162	3.44231	3.34586	3.26084	3.18599	3.12016	3.06237	3.0117	2.96736	2.92863	2.89489	2.86557	2.84018	2.81827	2.79944	2.78336	2.76971	2.75821	2.74863	2.74074	2.73435	2.7293	2.72543	2.72261	2.72072
CSys (µg/mL)	78	1	0	16.2749	19.9124	17.6347	12.5592	10.347	8.73936	7.53993	7.53993	6.85312	6.2975	5.83176	5.43131	5.08131	4.77242	4.49844	4.25486	4.03816	3.84539	3.67402	3.52175	3.38654	3.26655	3.16012	3.06575	2.98212	2.90801	2.84238	2.78427	2.73284	2.68734	2.6471	2.61153	2.58011	2.55236	2.52789	2.50631	2.4873	2.47058	2.45589	2.44299	2.43169	2.42181	2.41319	2.40568	2.39917	2.39353
CSys (µg/mL)	79	1	0	13.9817	17.0413	15.2102	11.2451	9.4107	8.02837	6.97205	6.97205	6.34224	5.83881	5.42443	5.07438	4.77238	4.50765	4.27298	4.06341	3.87541	3.7063	3.554	3.41677	3.29315	3.18181	3.08161	2.99149	2.91049	2.83774	2.77246	2.71393	2.6615	2.61457	2.57262	2.53516	2.50174	2.47198	2.44552	2.42204	2.40124	2.38286	2.36667	2.35245	2.34	2.32915	2.31975	2.31166	2.30473	2.29887
CSys (µg/mL)	80	1	0	17.4821	21.4121	19.0355	13.5709	11.1522	9.37581	8.04063	8.04063	7.26339	6.63728	6.11707	5.67491	5.29327	4.96072	4.66936	4.41341	4.18833	3.99036	3.81632	3.6634	3.52915	3.41139	3.30816	3.21776	3.13866	3.0695	3.00911	2.95644	2.91055	2.87063	2.83596	2.80593	2.77996	2.75757	2.73833	2.72187	2.70785	2.69598	2.686	2.67768	2.67084	2.66528	2.66086	2.65745	2.65492	2.65317
CSys (µg/mL)	81	1	0	18.0339	22.0481	19.7241	14.5897	12.1969	10.3808	8.98204	8.98204	8.13578	7.45452	6.8916	6.41601	6.00709	5.65096	5.33803	5.06147	4.81622	4.59833	4.40459	4.2323	4.07914	3.94305	3.82223	3.71503	3.62001	3.53586	3.46141	3.39561	3.33753	3.28633	3.24126	3.20165	3.16691	3.13651	3.10997	3.08686	3.06683	3.04952	3.03465	3.02194	3.01115	3.00209	2.99456	2.98838	2.98343	2.97955
CSys (µg/mL)	82	1	0	15.958	19.4888	17.3369	12.7197	10.5773	8.95669	7.71295	7.71295	6.96328	6.36159	5.86587	5.44821	5.09003	4.77884	4.50602	4.26542	4.0525	3.86369	3.69613	3.54741	3.41543	3.29838	3.19464	3.10276	3.02145	2.94957	2.88607	2.83003	2.78064	2.73716	2.69893	2.66537	2.63595	2.61023	2.58779	2.56825	2.55131	2.53666	2.52405	2.51326	2.50407	2.49631	2.48983	2.48447	2.48011	2.47663
CSys (µg/mL)	83	1	0	16.4506	20.1271	17.8686	12.8079	10.6175	9.03447	7.85847	7.85847	7.19356	6.65496	6.20129	5.80837	5.46197	5.15342	4.87716	4.62926	4.4067	4.20695	4.0278	3.86727	3.72355	3.59497	3.48002	3.37733	3.28566	3.20388	3.13097	3.06602	3.00822	2.95682	2.91117	2.87067	2.83479	2.80305	2.77502	2.75033	2.72862	2.70959	2.69296	2.67849	2.66594	2.65513	2.64587	2.638	2.63139	2.62589
CSys (µg/mL)	84	1	0	15.0912	18.4114	16.423	12.1332	10.1552	8.66791	7.53336	7.53336	6.85994	6.32184	5.87887	5.50455	5.18154	4.89839	4.64745	4.42346	4.22262	4.0421	3.87963	3.73335	3.60166	3.48313	3.3765	3.28064	3.1945	3.11715	3.04773	2.98547	2.92968	2.87972	2.83501	2.79503	2.75933	2.72748	2.6991	2.67385	2.65141	2.63151	2.6139	2.59836	2.58467	2.57265	2.56215	2.553	2.54508	2.53827
CSys (µg/mL)	85	1	0	18.0046	22.0027	19.5541	14.0379	11.6451	9.91637	8.63501	8.63501	7.91361	7.3327	6.84565	6.4249	6.05415	5.72353	5.4268	5.15969	4.91898	4.70209	4.50677	4.331	4.17297	4.03099	3.90353	3.78918	3.68666	3.59481	3.51258	3.439	3.37323	3.31448	3.26206	3.21534	3.17375	3.13677	3.10395	3.07488	3.04918	3.02651	3.00657	2.9891	2.97384	2.96057	2.94911	2.93926	2.93086	2.92378
CSys (µg/mL)	86	1	0	15.5971	19.082	16.9518	12.3908	10.272	8.66654	7.43204	7.43204	6.68504	6.08487	5.59084	5.17583	4.82166	4.51589	4.24983	4.01713	3.81301	3.63366	3.47598	3.33736	3.21555	3.10857	3.0147	2.93242	2.86037	2.79736	2.74233	2.69433	2.65255	2.61625	2.58477	2.55756	2.5341	2.51395	2.49673	2.48207	2.46968	2.45928	2.45065	2.44358	2.43787	2.43336	2.42992	2.42741	2.42573	2.42478
CSys (µg/mL)	87	1	0	15.6353	19.0992	17.1149	12.7018	10.6442	9.08287	7.88092	7.88092	7.15484	6.57069	6.08789	5.67945	5.32746	5.01988	4.74853	4.50762	4.29292	4.10116	3.92973	3.77644	3.6394	3.51695	3.4076	3.31004	3.22306	3.14559	3.07666	3.01539	2.96098	2.91273	2.87001	2.83224	2.7989	2.76954	2.74374	2.72113	2.70137	2.68418	2.66928	2.65644	2.64543	2.63607	2.62819	2.62163	2.61625	2.61193
CSys (µg/mL)	88	1	0	14.5244	17.7645	15.6969	11.1826	9.24045	7.84259	6.80766	6.80766	6.22608	5.75525	5.35871	5.01528	4.71256	4.44304	4.20185	3.98557	3.79155	3.61755	3.46164	3.32203	3.19714	3.0855	2.98576	2.89673	2.8173	2.74649	2.6834	2.62724	2.57728	2.53289	2.49347	2.45852	2.42757	2.4002	2.37604	2.35476	2.33605	2.31965	2.30532	2.29285	2.28203	2.2727	2.26469	2.25789	2.25215	2.24737
CSys (µg/mL)	89	1	0	15.7486	19.3027	16.9379	11.8678	9.66662	8.06886	6.87798	6.87798	6.196	5.64606	5.18855	4.79964	4.46456	4.17361	3.92	3.69857	3.50519	3.33635	3.18904	3.06062	2.94874	2.85135	2.76665	2.69302	2.62907	2.57359	2.52548	2.48382	2.44778	2.41665	2.3898	2.3667	2.34685	2.32986	2.31535	2.30301	2.29256	2.28378	2.27643	2.27035	2.26537	2.26136	2.25819	2.25575	2.25395	2.25272
CSys (µg/mL)	90	1	0	16.0197	19.6162	17.3449	12.367	10.2265	8.68419	7.53967	7.53967	6.89406	6.36912	5.92559	5.54083	5.20163	4.89994	4.63047	4.38942	4.17376	3.98094	3.80866	3.65488	3.51771	3.39545	3.28656	3.18962	3.10338	3.0267	2.95856	2.89806	2.84436	2.79676	2.75459	2.71727	2.68429	2.65517	2.62951	2.60693	2.58711	2.56974	2.55457	2.54136	2.5299	2.52	2.5115	2.50424	2.49809	2.49293
CSys (µg/mL)	91	1	0	15.9023	19.4065	17.2749	12.7102	10.6024	9.01477	7.8013	7.8013	7.07683	6.49678	6.01896	5.61553	5.2682	4.9648	4.69713	4.45945	4.24756	4.05827	3.88902	3.73766	3.60234	3.48142	3.37344	3.27711	3.19123	3.11474	3.04669	2.9862	2.93249	2.88487	2.84271	2.80544	2.77254	2.74358	2.71813	2.69583	2.67636	2.65942	2.64475	2.63211	2.62129	2.61211	2.60438	2.59796	2.59272	2.58853
CSys (µg/mL)	92	1	0	17.6455	21.588	19.2587	14.2307	11.9214	10.1857	8.85845	8.85845	8.06826	7.43104	6.90155	6.4506	6.05937	5.71554	5.41083	5.13945	4.8971	4.68043	4.48667	4.31346	4.1587	4.02054	3.8973	3.78748	3.6897	3.60272	3.52544	3.45685	3.39605	3.34223	3.29465	3.25267	3.21571	3.18323	3.15477	3.12991	3.10827	3.08952	3.07335	3.05949	3.0477	3.03776	3.02949	3.0227	3.01724	3.01296
CSys (µg/mL)	93	1	0	14.5603	17.8466	16.0948	11.674	9.66929	8.17278	7.03345	7.03345	6.3542	5.80611	5.35121	4.96531	4.63281	4.34334	4.08974	3.86679	3.67046	3.49747	3.34507	3.21088	3.09283	2.98905	2.89791	2.81794	2.74787	2.68652	2.63289	2.58607	2.54526	2.50976	2.47893	2.45224	2.42919	2.40936	2.39237	2.37788	2.36559	2.35526	2.34664	2.33954	2.33378	2.3292	2.32566	2.32303	2.32122	2.32012
CSys (µg/mL)	94	1	0	18.5827	22.6827	20.0206	14.5581	12.0637	10.1978	8.77881	8.77881	7.9381	7.26492	6.71009	6.24166	5.83882	5.48781	5.17927	4.90658	4.66482	4.45015	4.25942	4.08997	3.93949	3.80592	3.68746	3.58246	3.48947	3.4072	3.33446	3.27022	3.21354	3.16359	3.11963	3.08101	3.04713	3.01746	2.99155	2.96898	2.94938	2.93243	2.91782	2.90531	2.89465	2.88566	2.87813	2.87192	2.86688	2.86287
CSys (µg/mL)	95	1	0	17.3765	21.272	19.0238	14.0482	11.7252	9.95809	8.59372	8.59372	7.76407	7.09458	6.54083	6.07325	5.67207	5.32383	5.01915	4.75122	4.51492	4.30619	4.1217	3.95864	3.81459	3.6874	3.5752	3.4763	3.38922	3.31262	3.24533	3.18628	3.13455	3.0893	3.04979	3.01537	2.98546	2.95954	2.93715	2.9179	2.90141	2.88739	2.87554	2.86561	2.85739	2.85067	2.8453	2.8411	2.83795	2.83573
CSys (µg/mL)	96	1	0	14.9777	18.3193	16.374	12.1204	10.1543	8.66985	7.53041	7.53041	6.84656	6.29462	5.83623	5.44638	5.10877	4.8126	4.55058	4.31754	4.10968	3.924	3.75808	3.60983	3.47745	3.3593	3.25396	3.16012	3.0766	3.00233	2.93637	2.87784	2.82599	2.7801	2.73956	2.7038	2.67233	2.6447	2.62049	2.59936	2.58098	2.56505	2.55132	2.53957	2.52957	2.52114	2.51413	2.50837	2.50374	2.50011
CSys (µg/mL)	97	1	0	16.6703	20.3393	18.2101	13.5168	11.3383	9.69193	8.43013	8.43013	7.6746	7.06906	6.56959	6.14708	5.78231	5.46257	5.17929	4.92653	4.70003	4.49657	4.3136	4.14899	4.00091	3.86776	3.7481	3.64064	3.54419	3.45769	3.38016	3.31074	3.24862	3.19309	3.14349	3.09924	3.0598	3.0247	2.99351	2.96583	2.94132	2.91967	2.90058	2.88381	2.86912	2.8563	2.84517	2.83556	2.82732	2.8203
CSys (µg/mL)	98	1	0	19.1853	23.4933	20.784	14.7323	12.0774	10.1395	8.68996	8.68996	7.8543	7.1814	6.62186	6.1456	5.73396	5.37486	5.05999	4.78324	4.53982	4.32572	4.1375	3.97216	3.82702	3.69972	3.58816	3.49045	3.40495	3.33019	3.26489	3.2079	3.15823	3.11498	3.07738	3.04476	3.01651	2.9921	2.97108	2.95302	2.93758	2.92444	2.91332	2.90398	2.8962	2.88981	2.88462	2.8805	2.87732	2.87497
CSys (µg/mL)	99	1	0	17.8262	21.8899	19.4762	13.9876	11.6093	9.88091	8.58512	8.58512	7.84058	7.22958	6.71061	6.25982	5.86313	5.51175	5.19964	4.92225	4.67582	4.4571	4.26316	4.09137	3.93935	3.80493	3.68617	3.58133	3.48886	3.40736	3.33561	3.27251	3.21708	3.16845	3.12586	3.08863	3.05616	3.0279	3.00338	2.98219	2.96394	2.94831	2.93499	2.92374	2.91431	2.90651	2.90015	2.89506	2.89111	2.88817
CSys (µg/mL)	100	1	0	15.1207	18.4467	16.405	12.0962	10.1324	8.66837	7.55906	7.55906	6.91029	6.39224	5.96459	5.60137	5.28593	5.00756	4.75924	4.53626	4.33527	4.15374	3.98968	3.84142	3.70748	3.58657	3.47749	3.37917	3.29063	3.21094	3.1393	3.07495	3.01721	2.96544	2.9191	2.87765	2.84065	2.80766	2.7783	2.75223	2.72914	2.70875	2.69079	2.67503	2.66126	2.6493	2.63897	2.63012	2.6226	2.61628
CSys (µg/mL)	101	1	0	15.1197	18.4165	16.2489	12.0925	10.1495	8.67537	7.54335	7.54335	6.86565	6.32434	5.87984	5.50552	5.18356	4.90204	4.65288	4.43052	4.23101	4.05142	3.88945	3.74328	3.61133	3.49224	3.38482	3.28797	3.20072	3.12217	3.0515	2.98798	2.93094	2.87975	2.83386	2.79278	2.75603	2.72321	2.69394	2.66788	2.64473	2.62419	2.60603	2.59002	2.57594	2.56362	2.55288	2.54357	2.53556	2.52871
CSys (µg/mL)	102	1	0	18.1756	22.1909	19.4537	14.1139	11.7547	10.0311	8.74402	8.74402	8.01319	7.42701	6.93829	6.51827	6.14946	5.82113	5.52645	5.26082	5.02094	4.80419	4.6084	4.43163	4.27218	4.12844	3.99898	3.88246	3.77767	3.68349	3.59891	3.52301	3.45496	3.394	3.33944	3.29067	3.24713	3.20832	3.17377	3.14307	3.11586	3.09178	3.07055	3.05189	3.03554	3.02129	3.00892	2.99827	2.98916	2.98144
CSys (µg/mL)	103	1	0	16.5856	20.3254	17.9779	12.7525	10.4693	8.80558	7.56121	7.56121	6.84496	6.26592	5.78236	5.36917	5.0109	4.69759	4.42237	4.18015	3.96686	3.77911	3.61394	3.46876	3.34125	3.22936	3.13126	3.04532	2.97011	2.90434	2.84689	2.79677	2.7531	2.71512	2.68213	2.65355	2.62885	2.60756	2.58928	2.57364	2.56034	2.54909	2.53965	2.5318	2.52536	2.52016	2.51604	2.51289	2.51058	2.50903
CSys (µg/mL)	104	1	0	17.1998	21.1215	18.7811	13.4122	11.0542	9.32615	8.02506	8.02506	7.26776	6.65146	6.13437	5.69137	5.30695	4.97095	4.67623	4.41738	4.18999	3.99033	3.81515	3.66157	3.52702	3.40923	3.3062	3.21614	3.13748	3.06882	3.00894	2.95679	2.9114	2.87195	2.83772	2.80806	2.78242	2.76031	2.74129	2.725	2.71108	2.69926	2.68928	2.68092	2.67398	2.66828	2.66367	2.66003	2.65723	2.65518
CSys (µg/mL)	105	1	0	17.8798	21.9035	19.6507	14.6167	12.2818	10.513	9.14998	9.14998	8.32753	7.66086	7.10518	6.63136	6.22038	5.85962	5.5405	5.25689	5.0042	4.77879	4.57767	4.39826	4.2383	4.09578	3.96889	3.85601	3.75567	3.66656	3.58748	3.51738	3.4553	3.40039	3.35188	3.30908	3.27138	3.23824	3.20917	3.18372	3.16152	3.1422	3.12546	3.11102	3.09864	3.08808	3.07915	3.07168	3.06551	3.06049
CSys (µg/mL)	106	1	0	15.5339	19.0338	16.9145	12.4167	10.3572	8.8106	7.62765	7.62765	6.92236	6.35243	5.87851	5.47531	5.12651	4.82129	4.55229	4.3142	4.10302	3.91552	3.74904	3.60125	3.47014	3.3539	3.25091	3.15973	3.07908	3.00779	2.94483	2.88927	2.84031	2.79719	2.75927	2.72597	2.69677	2.67122	2.6489	2.62945	2.61256	2.59793	2.58532	2.57448	2.56523	2.55739	2.5508	2.54531	2.5408	2.53716
CSys (µg/mL)	107	1	0	17.6538	21.6707	19.2577	13.7801	11.3943	9.65523	8.34981	8.34981	7.59598	6.97982	6.45934	6.00994	5.61682	5.27055	4.96459	4.694	4.45475	4.24335	4.05673	3.89215	3.74712	3.61944	3.50711	3.40836	3.32162	3.2455	3.17875	3.12028	3.06913	3.02443	2.98544	2.95149	2.92198	2.8964	2.87429	2.85524	2.8389	2.82495	2.81312	2.80314	2.79481	2.78794	2.78236	2.77791	2.77447	2.77191
CSys (µg/mL)	108	1	0	15.5891	19.0827	16.9458	12.0897	9.95489	8.3939	7.22375	7.22375	6.54675	5.99955	5.54237	5.15108	4.81086	4.51218	4.2486	4.01542	3.80895	3.62613	3.46431	3.32117	3.19464	3.08284	2.98412	2.897	2.82015	2.75239	2.69268	2.64009	2.5938	2.55307	2.51726	2.48581	2.45821	2.43401	2.41283	2.3943	2.37812	2.36403	2.35178	2.34115	2.33196	2.32404	2.31725	2.31145	2.30653	2.30238
CSys (µg/mL)	109	1	0	16.2146	19.7923	17.8007	13.2875	11.1759	9.57011	8.3319	8.3319	7.58239	6.97901	6.4798	6.05675	5.69125	5.37087	5.08717	4.83424	4.60783	4.40468	4.22222	4.05828	3.91103	3.77882	3.66021	3.55388	3.45864	3.37341	3.29721	3.22917	3.16847	3.11438	3.06626	3.02351	2.9856	2.95204	2.9224	2.89629	2.87335	2.85328	2.83577	2.82059	2.80748	2.79626	2.78672	2.7787	2.77204	2.76661
CSys (µg/mL)	110	1	0	17.0979	20.8912	18.2811	13.2034	10.9531	9.30426	8.06975	8.06975	7.36382	6.79757	6.32665	5.92379	5.57218	5.26126	4.98416	4.73615	4.51372	4.3141	4.13497	3.97428	3.83024	3.7012	3.58568	3.48234	3.38994	3.30739	3.23368	3.16792	3.1093	3.05707	3.0106	2.96928	2.93259	2.90006	2.87125	2.84578	2.82332	2.80355	2.7862	2.77101	2.75777	2.74627	2.73634	2.72781	2.72055	2.71441
CSys (µg/mL)	111	1	0	15.001	18.3341	16.365	12.0433	10.02	8.47951	7.29069	7.29069	6.56674	5.98498	5.50626	5.10417	4.76088	4.46414	4.20538	3.97843	3.77863	3.60237	3.44671	3.30921	3.18777	3.08056	2.98599	2.90263	2.82923	2.76466	2.70793	2.65815	2.61453	2.57638	2.54306	2.51404	2.48881	2.46695	2.44808	2.43184	2.41794	2.40611	2.39612	2.38775	2.38082	2.37516	2.37063	2.36709	2.36444	2.36257
CSys (µg/mL)	112	1	0	16.7599	20.5206	18.1838	12.9131	10.5926	8.89485	7.62286	7.62286	6.88689	6.29447	5.8022	5.3835	5.02176	4.7062	4.42942	4.186	3.97167	3.78293	3.61678	3.47059	3.34203	3.22906	3.12984	3.04275	2.96635	2.89937	2.84068	2.78929	2.74433	2.70502	2.67069	2.64073	2.61464	2.59193	2.57221	2.55511	2.54032	2.52757	2.5166	2.50721	2.49921	2.49242	2.48671	2.48195	2.47802	2.47481
CSys (µg/mL)	113	1	0	16.0009	19.5857	17.6215	13.1131	10.9849	9.35331	8.08499	8.08499	7.30446	6.67268	6.14928	5.70701	5.32739	4.99771	4.70903	4.45487	4.23034	4.03156	3.85542	3.69926	3.56081	3.4381	3.32936	3.23306	3.1478	3.07235	3.00562	2.94663	2.8945	2.84847	2.80785	2.77202	2.74044	2.71263	2.68815	2.66664	2.64775	2.63119	2.61669	2.60401	2.59295	2.58332	2.57495	2.56771	2.56146	2.5561
CSys (µg/mL)	114	1	0	15.5736	19.0152	17.1029	12.7662	10.7369	9.19322	8.00232	8.00232	7.28081	6.69951	6.21824	5.8102	5.45758	5.14849	4.87482	4.63092	4.41267	4.21693	4.04119	3.88337	3.74166	3.61448	3.50042	3.39819	3.30664	3.22473	3.15151	3.08611	3.02777	2.97577	2.92949	2.88835	2.85184	2.81949	2.79089	2.76565	2.74345	2.72396	2.70693	2.69209	2.67924	2.66816	2.65869	2.65065	2.6439	2.63831
CSys (µg/mL)	115	1	0	15.4162	18.8532	16.5503	11.603	9.44803	7.88482	6.72361	6.72361	6.062	5.53289	5.09554	4.72511	4.40614	4.12863	3.88579	3.67263	3.4853	3.32062	3.1759	3.04879	2.93721	2.83935	2.75356	2.67843	2.61267	2.55516	2.50491	2.46105	2.42279	2.38948	2.3605	2.33534	2.31353	2.29467	2.27841	2.26442	2.25244	2.24222	2.23356	2.22625	2.22014	2.21509	2.21097	2.20766	2.20506	2.2031
CSys (µg/mL)	116	1	0	17.3522	21.2366	18.9282	13.6385	11.338	9.66973	8.42682	8.42682	7.72049	7.14777	6.66504	6.24669	5.8776	5.54854	5.25359	4.9886	4.75037	4.53625	4.34393	4.17131	4.0165	3.87776	3.75349	3.64225	3.54273	3.45374	3.37421	3.30318	3.23976	3.18319	3.13277	3.08785	3.04789	3.01236	2.98082	2.95285	2.92808	2.9062	2.8869	2.86992	2.85502	2.84198	2.83062	2.82075	2.81224	2.80493
CSys (µg/mL)	117	1	0	13.7166	16.6722	14.5733	10.7184	8.94272	7.61228	6.60338	6.60338	6.01271	5.54614	5.1662	4.84795	4.57486	4.33605	4.12429	3.93469	3.76387	3.60937	3.46933	3.34228	3.22695	3.12229	3.02734	2.94124	2.8632	2.79251	2.72851	2.67061	2.61826	2.57095	2.52823	2.48968	2.45492	2.42361	2.39542	2.37007	2.34731	2.32689	2.3086	2.29224	2.27764	2.26463	2.25307	2.24283	2.23378	2.22581
CSys (µg/mL)	118	1	0	17.2126	20.9855	18.4025	13.3419	11.0926	9.44415	8.2118	8.2118	7.50879	6.94747	6.48207	6.0842	5.73635	5.4276	5.15099	4.90187	4.6769	4.47354	4.28969	4.12354	3.97349	3.83805	3.71591	3.60582	3.50666	3.4174	3.33712	3.26494	3.20011	3.14191	3.08972	3.04295	3.00108	2.96364	2.93021	2.9004	2.87386	2.85027	2.82936	2.81086	2.79454	2.78019	2.76762	2.75666	2.74716	2.73897
CSys (µg/mL)	119	1	0	15.4036	18.868	16.9227	12.1897	10.0609	8.48186	7.2867	7.2867	6.58157	6.01454	5.54495	5.14709	4.8045	4.50634	4.24517	4.01556	3.81337	3.6352	3.47823	3.34	3.21835	3.11138	3.01738	2.93485	2.86246	2.79902	2.74347	2.69489	2.65246	2.61544	2.5832	2.55518	2.53087	2.50984	2.4917	2.47611	2.46276	2.4514	2.44178	2.43371	2.42699	2.42148	2.41702	2.4135	2.4108	2.40883
CSys (µg/mL)	120	1	0	16.429	20.0932	17.7831	12.6925	10.4955	8.91057	7.7348	7.7348	7.07108	6.53337	6.08041	5.68817	5.34256	5.03501	4.75998	4.51355	4.29268	4.0948	3.91767	3.75926	3.61771	3.49133	3.37859	3.27808	3.18855	3.10885	3.03796	2.97496	2.91901	2.86939	2.82542	2.78651	2.75214	2.72182	2.69513	2.6717	2.65116	2.63324	2.61764	2.60412	2.59248	2.5825	2.57402	2.56687	2.56093	2.55605
CSys (µg/mL)	121	1	0	15.678	19.1884	16.7922	12.175	10.1081	8.58179	7.43118	7.43118	6.76512	6.22962	5.78452	5.40483	5.07492	4.78479	4.5278	4.29929	4.09573	3.91431	3.75265	3.6087	3.48062	3.36674	3.2656	3.17584	3.09626	3.02578	2.96342	2.90831	2.85967	2.8168	2.77908	2.74596	2.71693	2.69156	2.66946	2.65026	2.63367	2.61939	2.60718	2.59682	2.5881	2.58086	2.57493	2.57017	2.56646	2.56369
CSys (µg/mL)	122	1	0	17.4156	21.2955	18.7663	13.712	11.4669	9.81743	8.57725	8.57725	7.86462	7.28844	6.80489	6.38737	6.01976	5.69211	5.39801	5.13312	4.89419	4.67863	4.48423	4.30905	4.1513	4.00935	3.88173	3.76707	3.66413	3.57176	3.48895	3.41475	3.34833	3.28893	3.23584	3.18846	3.14621	3.1086	3.07517	3.0455	3.01923	2.99602	2.97556	2.9576	2.94187	2.92816	2.91628	2.90603	2.89727	2.88983
CSys (µg/mL)	123	1	0	15.5534	19.0374	16.786	12.1884	10.1019	8.54626	7.36498	7.36498	6.6688	6.10965	5.64714	5.25541	4.91783	4.62345	4.36479	4.13652	3.93462	3.75585	3.59756	3.45745	3.33351	3.22396	3.1272	3.04182	2.96656	2.90028	2.84198	2.79075	2.74581	2.70643	2.672	2.64195	2.61578	2.59306	2.5734	2.55646	2.54191	2.5295	2.51899	2.51015	2.5028	2.49677	2.49192	2.48811	2.48522	2.48314
CSys (µg/mL)	124	1	0	19.5481	23.9041	21.0295	15.265	12.6748	10.7564	9.30622	9.30622	8.45993	7.7785	7.21178	6.72838	6.30852	5.93951	5.61286	5.32254	5.06405	4.83376	4.62861	4.44597	4.28347	4.139	4.01068	3.89679	3.7958	3.70631	3.6271	3.55706	3.49518	3.4406	3.39251	3.35021	3.31307	3.28054	3.2521	3.22732	3.2058	3.18719	3.17116	3.15744	3.14578	3.13595	3.12776	3.12102	3.11559	3.11131
CSys (µg/mL)	125	1	0	16.4127	20.0704	17.7703	12.7151	10.5458	8.98812	7.83705	7.83705	7.19408	6.67326	6.23346	5.85104	5.51232	5.20919	4.93652	4.69075	4.46914	4.26943	4.08958	3.92777	3.7823	3.65164	3.53434	3.42911	3.33477	3.25023	3.17453	3.10679	3.0462	2.99207	2.94373	2.90062	2.8622	2.82802	2.79764	2.77069	2.74682	2.72573	2.70713	2.69078	2.67645	2.66394	2.65307	2.64367	2.6356	2.62872
CSys (µg/mL)	126	1	0	18.9878	23.1863	20.3763	14.8282	12.3669	10.5634	9.21325	9.21325	8.44283	7.82442	7.30876	6.86569	6.4768	6.1307	5.82016	5.54027	5.28752	5.05913	4.85279	4.66647	4.49834	4.34675	4.21014	4.08714	3.97645	3.8769	3.78743	3.70707	3.63493	3.57023	3.51225	3.46033	3.41388	3.37238	3.33533	3.30232	3.27295	3.24686	3.22374	3.2033	3.18527	3.16942	3.15554	3.14344	3.13294	3.1239
CSys (µg/mL)	127	1	0	16.7618	20.4542	17.894	12.9504	10.773	9.18595	8.0033	8.0033	7.33426	6.798	6.35087	5.96636	5.62843	5.32727	5.05669	4.81254	4.59184	4.39222	4.21174	4.04865	3.90141	3.76856	3.6488	3.54093	3.44382	3.35647	3.27796	3.20744	3.14415	3.0874	3.03657	2.99109	2.95044	2.91416	2.88183	2.85308	2.82756	2.80495	2.78499	2.76741	2.75199	2.73852	2.72681	2.7167	2.70803	2.70066
CSys (µg/mL)	128	1	0	15.5016	18.949	16.5974	11.9852	9.92867	8.41354	7.27312	7.27312	6.61293	6.08162	5.63939	5.2616	4.93289	4.64345	4.38679	4.15831	3.95456	3.77277	3.61061	3.46602	3.33719	3.2225	3.12046	3.02975	2.94918	2.87768	2.81426	2.75808	2.70836	2.66439	2.62558	2.59135	2.56123	2.53476	2.51155	2.49126	2.47357	2.4582	2.4449	2.43345	2.42364	2.41531	2.4083	2.40245	2.39765	2.39379
CSys (µg/mL)	129	1	0	16.9354	20.7857	18.3793	13.0743	10.7833	9.12272	7.88154	7.88154	7.17096	6.59002	6.0988	5.67423	5.30254	4.97501	4.6856	4.42969	4.20349	4.00373	3.82747	3.67211	3.53528	3.41488	3.30901	3.216	3.13434	3.06272	2.99994	2.94499	2.89693	2.85497	2.81838	2.78654	2.75889	2.73493	2.71424	2.69642	2.68115	2.66813	2.65708	2.64779	2.64004	2.63365	2.62847	2.62436	2.62118	2.61883
CSys (µg/mL)	130	1	0	18.1468	22.1945	19.9003	14.7908	12.4167	10.6179	9.23319	9.23319	8.39797	7.72329	7.16282	6.68619	6.27347	5.91143	5.59108	5.30609	5.05177	4.82447	4.62122	4.43948	4.27704	4.13195	4.00243	3.88691	3.78396	3.69227	3.61069	3.53816	3.47375	3.4166	3.36595	3.32113	3.28151	3.24655	3.21576	3.1887	3.16497	3.14422	3.12615	3.11045	3.09689	3.08524	3.07528	3.06685	3.05978	3.05393
CSys (µg/mL)	131	1	0	16.5488	20.219	17.7229	12.7791	10.5538	8.90439	7.65811	7.65811	6.92922	6.34459	5.86097	5.45095	5.09705	4.78787	4.51571	4.27508	4.06184	3.87272	3.70496	3.55621	3.42439	3.30765	3.20436	3.11302	3.03233	2.96111	2.89831	2.84298	2.79429	2.7515	2.71394	2.68104	2.65227	2.62716	2.60531	2.58634	2.56994	2.55582	2.54372	2.53342	2.52471	2.51742	2.51139	2.50647	2.50255	2.49951
CSys (µg/mL)	132	1	0	16.1578	19.7876	17.4024	12.3563	10.2215	8.69948	7.57796	7.57796	6.95632	6.44852	6.01631	5.63843	5.30291	5.00266	4.7331	4.49092	4.27341	4.07824	3.90327	3.74657	3.60633	3.4809	3.36879	3.26862	3.17918	3.09934	3.02811	2.96459	2.90798	2.85756	2.81268	2.77276	2.73728	2.70579	2.67786	2.65311	2.63123	2.61191	2.59488	2.5799	2.56676	2.55526	2.54524	2.53653	2.52901	2.52255
CSys (µg/mL)	133	1	0	18.2318	22.3007	19.9915	14.4421	11.9667	10.1408	8.76394	8.76394	7.95841	7.30849	6.76671	6.30367	5.90101	5.54699	5.23369	4.9555	4.7081	4.48803	4.2923	4.11833	3.9638	3.82665	3.705	3.59719	3.5017	3.4172	3.34247	3.27645	3.21817	3.16677	3.1215	3.08167	3.0467	3.01603	2.98919	2.96576	2.94536	2.92765	2.91235	2.89917	2.88789	2.8783	2.8702	2.86344	2.85787	2.85334
CSys (µg/mL)	134	1	0	14.5522	17.7396	15.4422	11.0917	9.18135	7.79338	6.76348	6.76348	6.18465	5.72365	5.34167	5.01498	4.72912	4.4752	4.24757	4.04247	3.85721	3.68973	3.53831	3.40147	3.27789	3.16636	3.06577	2.97511	2.89346	2.81997	2.75386	2.69445	2.64109	2.5932	2.55026	2.5118	2.47738	2.44663	2.41919	2.39474	2.37299	2.35369	2.3366	2.32151	2.30823	2.29658	2.28641	2.27758	2.26995	2.26341
CSys (µg/mL)	135	1	0	16.5677	20.2881	17.9013	12.7424	10.5381	8.95654	7.78621	7.78621	7.13066	6.59685	6.14465	5.75129	5.40361	5.09372	4.81646	4.5681	4.34567	4.14661	3.96863	3.80966	3.6678	3.5413	3.42858	3.32822	3.23892	3.15953	3.08898	3.02636	2.97083	2.92162	2.87808	2.8396	2.80565	2.77575	2.74946	2.72641	2.70625	2.68868	2.67343	2.66024	2.6489	2.63922	2.63101	2.62413	2.61842	2.61378
CSys (µg/mL)	136	1	0	16.7708	20.4401	18.0635	13.1747	10.9435	9.27761	8.01406	8.01406	7.26967	6.67583	6.18736	5.77485	5.41917	5.10776	4.83224	4.58679	4.36723	4.17035	3.9936	3.83483	3.69222	3.56412	3.4491	3.34583	3.25314	3.16997	3.09535	3.02842	2.96839	2.91456	2.86629	2.82302	2.78424	2.74948	2.71833	2.69043	2.66544	2.64305	2.62302	2.60508	2.58904	2.57469	2.56186	2.55041	2.54018	2.53105
CSys (µg/mL)	137	1	0	16.9167	20.7339	18.4634	13.6175	11.4073	9.75188	8.48747	8.48747	7.73761	7.1302	6.62291	6.18892	5.81117	5.47858	5.18369	4.92122	4.68717	4.47833	4.29204	4.12593	3.97795	3.84623	3.72908	3.625	3.53261	3.45068	3.37812	3.31393	3.25721	3.20717	3.1631	3.12436	3.09037	3.06064	3.03471	3.01216	2.99265	2.97583	2.96143	2.94918	2.93886	2.93025	2.92317	2.91747	2.91298	2.90958
CSys (µg/mL)	138	1	0	15.1252	18.5129	16.4318	12.0021	9.95152	8.4011	7.21063	7.21063	6.49263	5.91532	5.43941	5.03889	4.69642	4.40023	4.14208	3.91597	3.71736	3.54264	3.38886	3.25351	3.13442	3.02969	2.93767	2.85687	2.78598	2.72385	2.66946	2.62189	2.58034	2.54409	2.51253	2.4851	2.4613	2.44072	2.42295	2.40768	2.3946	2.38346	2.37402	2.36608	2.35946	2.354	2.34957	2.34604	2.34331	2.34127
CSys (µg/mL)	139	1	0	16.7811	20.4855	18.0456	12.8303	10.6067	9.02202	7.86211	7.86211	7.22678	6.71813	6.29235	5.92401	5.59839	5.30682	5.04394	4.80617	4.5909	4.39601	4.21967	4.06023	3.9162	3.78618	3.66889	3.56317	3.46792	3.38217	3.30502	3.23566	3.17334	3.11741	3.06724	3.0223	2.98209	2.94615	2.91408	2.88551	2.86011	2.83758	2.81765	2.80006	2.7846	2.77106	2.75926	2.74903	2.74024	2.73273
CSys (µg/mL)	140	1	0	14.7559	17.988	16.0931	11.9579	10.0519	8.61995	7.52842	7.52842	6.88266	6.36661	5.94104	5.58019	5.2673	4.99144	4.74539	4.5243	4.32474	4.14416	3.98059	3.83238	3.69813	3.57658	3.46661	3.36719	3.27738	3.19631	3.12321	3.05735	2.99807	2.94476	2.89688	2.85392	2.81544	2.78102	2.75028	2.72289	2.69853	2.67692	2.65781	2.64097	2.62617	2.61325	2.60201	2.59231	2.58399	2.57694
CSys (µg/mL)	141	1	0	16.4123	20.0663	17.8744	13.144	10.9528	9.29667	8.02563	8.02563	7.26098	6.64623	6.13865	5.71003	5.34171	5.02115	4.73975	4.49135	4.27137	4.07623	3.90301	3.74923	3.61278	3.49176	3.38451	3.28954	3.20553	3.13127	3.0657	3.00788	2.95694	2.91213	2.87278	2.83828	2.80809	2.78174	2.7588	2.73889	2.72168	2.70687	2.69419	2.68341	2.67431	2.66671	2.66044	2.65535	2.65132	2.64822
CSys (µg/mL)	142	1	0	14.6961	18.0271	16.0064	11.4587	9.48684	8.0542	6.98145	6.98145	6.36529	5.86103	5.43379	5.06338	4.73783	4.44964	4.19369	3.96618	3.76398	3.58442	3.4251	3.28387	3.1588	3.04811	2.95023	2.86375	2.78738	2.72	2.66061	2.6083	2.56227	2.52183	2.48634	2.45524	2.42804	2.40431	2.38364	2.3657	2.35018	2.33681	2.32534	2.31556	2.30728	2.30034	2.29458	2.28987	2.28609	2.28313
CSys (µg/mL)	143	1	0	16.0153	19.6102	17.4399	12.8179	10.6981	9.10484	7.88557	7.88557	7.15753	6.56925	6.07999	5.66358	5.30306	4.98727	4.70862	4.46168	4.24234	4.04736	3.87402	3.71997	3.58317	3.46178	3.35416	3.25883	3.17448	3.09991	3.03407	2.97601	2.92486	2.87988	2.84039	2.80578	2.77552	2.74913	2.72618	2.70629	2.68913	2.67439	2.66181	2.65115	2.64219	2.63474	2.62865	2.62376	2.61993	2.61704
CSys (µg/mL)	144	1	0	17.686	21.7099	19.3476	13.9056	11.5312	9.79888	8.49769	8.49769	7.74609	7.13152	6.6118	6.16223	5.76803	5.41982	5.1112	4.83736	4.59442	4.37902	4.18822	4.01935	3.87002	3.73808	3.62159	3.51882	3.42821	3.3484	3.27816	3.21639	3.16214	3.11454	3.07284	3.03637	3.00454	2.9768	2.9527	2.93182	2.9138	2.89831	2.88505	2.87379	2.86428	2.85634	2.84978	2.84445	2.8402	2.83691
CSys (µg/mL)	145	1	0	15.3579	18.8005	16.6581	12.2064	10.1885	8.68508	7.54287	7.54287	6.87132	6.32971	5.87881	5.49384	5.15909	4.86443	4.60308	4.3703	4.16251	3.97689	3.81108	3.66304	3.53095	3.41318	3.30826	3.21487	3.13182	3.05802	2.9925	2.93439	2.88292	2.83737	2.79712	2.76161	2.73033	2.70283	2.67872	2.65764	2.63925	2.62327	2.60946	2.59757	2.5874	2.57877	2.57151	2.56548	2.56055	2.55659
CSys (µg/mL)	146	1	0	15.2335	18.5573	16.5632	12.2666	10.2904	8.80923	7.68364	7.68364	7.02113	6.49416	6.06156	5.69623	5.38048	5.10276	4.85547	4.63345	4.43312	4.25186	4.08761	3.93871	3.80374	3.68145	3.57072	3.47052	3.37992	3.29806	3.22417	3.15752	3.09747	3.0434	2.99477	2.95109	2.9119	2.8768	2.8454	2.81737	2.7924	2.77021	2.75053	2.73315	2.71785	2.70443	2.69273	2.68258	2.67385	2.6664
CSys (µg/mL)	147	1	0	14.5785	17.8086	15.692	11.1442	9.19525	7.79821	6.76877	6.76877	6.19551	5.73341	5.34516	5.0091	4.71259	4.44808	4.21075	3.99728	3.80514	3.63225	3.47678	3.33708	3.21165	3.09911	2.99821	2.90779	2.82682	2.75434	2.68949	2.63152	2.57972	2.53347	2.49221	2.45543	2.42267	2.39353	2.36764	2.34468	2.32433	2.30635	2.29048	2.27651	2.26426	2.25354	2.2442	2.2361	2.22911	2.22313
CSys (µg/mL)	148	1	0	15.6898	19.1422	17.0384	12.492	10.3671	8.75267	7.51046	7.51046	6.75678	6.15372	5.65945	5.24567	4.8932	4.58894	4.32374	4.09106	3.88604	3.70493	3.54473	3.40295	3.27747	3.16645	3.06829	2.98157	2.905	2.83748	2.77798	2.72562	2.67959	2.63919	2.60379	2.57281	2.54577	2.52222	2.50176	2.48405	2.46878	2.45566	2.44446	2.43496	2.42697	2.42031	2.41484	2.41041	2.40692	2.40426
CSys (µg/mL)	149	1	0	18.3212	22.4131	19.855	14.5214	12.0872	10.2642	8.87372	8.87372	8.04768	7.38166	6.82879	6.35901	5.95291	5.59771	5.28469	5.00763	4.76182	4.54352	4.34962	4.17744	4.02464	3.88911	3.76901	3.66266	3.56856	3.48538	3.41192	3.34711	3.29	3.23974	3.19557	3.15681	3.12288	3.09323	3.06739	3.04494	3.0255	3.00875	2.99438	2.98214	2.97178	2.9631	2.95591	2.95005	2.94537	2.94175
CSys (µg/mL)	150	1	0	16.7661	20.4412	17.903	12.9452	10.7382	9.11865	7.90681	7.90681	7.21332	6.65994	6.20194	5.81143	5.47109	5.17001	4.90119	4.65988	4.44268	4.24696	4.07056	3.91163	3.76852	3.63975	3.52396	3.41991	3.32649	3.24266	3.16749	3.10015	3.03985	2.98592	2.93772	2.8947	2.85633	2.82217	2.79179	2.76483	2.74094	2.71982	2.70121	2.68485	2.67051	2.65801	2.64715	2.63779	2.62976	2.62293
CSys (µg/mL)	151	1	0	12.922	15.7438	13.9031	10.1521	8.45554	7.19899	6.25382	6.25382	5.70771	5.27505	4.92042	4.62097	4.36204	4.13421	3.93133	3.74929	3.5852	3.43692	3.30277	3.18137	3.07152	2.97217	2.88237	2.80124	2.72799	2.66191	2.60232	2.54864	2.50031	2.45683	2.41774	2.38264	2.35115	2.32293	2.29768	2.27511	2.25497	2.23703	2.22109	2.20696	2.19447	2.18346	2.17379	2.16533	2.15798	2.15163
CSys (µg/mL)	152	1	0	15.3749	18.8058	16.6858	12.2222	10.177	8.64225	7.47039	7.47039	6.77269	6.21098	5.74548	5.35045	5.00921	4.71076	4.44762	4.21449	4.00739	3.82319	3.65932	3.51356	3.38397	3.26885	3.16665	3.07599	2.99564	2.92448	2.86152	2.80587	2.75673	2.71339	2.67521	2.64163	2.61215	2.58631	2.56371	2.544	2.52686	2.512	2.49917	2.48815	2.47874	2.47076	2.46406	2.45848	2.45391	2.45023
CSys (µg/mL)	153	1	0	17.4411	21.3414	19.1301	14.1852	11.8748	10.1168	8.75912	8.75912	7.93402	7.26782	6.71602	6.24903	5.84713	5.49699	5.1894	4.91772	4.67701	4.46338	4.27365	4.10515	3.95555	3.82282	3.70513	3.60086	3.50858	3.42698	3.35489	3.29129	3.23524	3.18591	3.14257	3.10455	3.07127	3.04221	3.0169	2.99493	2.97592	2.95956	2.94554	2.93361	2.92353	2.91511	2.90815	2.9025	2.898	2.89454
CSys (µg/mL)	154	1	0	15.8258	19.3299	17.2415	12.7536	10.6976	9.15776	7.98565	7.98565	7.29443	6.74044	6.28213	5.89263	5.5546	5.2568	4.99177	4.75443	4.54112	4.34905	4.17599	4.02005	3.8796	3.75316	3.63941	3.53716	3.44531	3.36286	3.28892	3.22266	3.16333	3.11026	3.06285	3.02053	2.98281	2.94925	2.91943	2.89299	2.86959	2.84895	2.83078	2.81485	2.80094	2.78885	2.77841	2.76944	2.76181	2.75539
CSys (µg/mL)	155	1	0	14.2141	17.3754	15.4027	11.293	9.42463	8.03101	6.97241	6.97241	6.34946	5.84854	5.43273	5.07847	4.77073	4.49982	4.25928	4.04462	3.85255	3.68049	3.52631	3.38821	3.26457	3.15396	3.05507	2.96674	2.8879	2.81759	2.75494	2.69917	2.64956	2.60549	2.56638	2.53172	2.50105	2.47395	2.45006	2.42904	2.4106	2.39446	2.38039	2.36817	2.35761	2.34854	2.34079	2.33424	2.32876	2.32423
CSys (µg/mL)	156	1	0	14.8415	18.1469	16.2061	12.0012	10.0699	8.6189	7.50967	7.50967	6.85005	6.31816	5.87587	5.49859	5.17051	4.88131	4.62412	4.39419	4.18801	4.00288	3.83659	3.68726	3.55321	3.43296	3.32518	3.22864	3.14224	3.06498	2.99595	2.93433	2.87937	2.83041	2.78684	2.74811	2.71375	2.68329	2.65636	2.63259	2.61166	2.59328	2.5772	2.56317	2.551	2.54048	2.53146	2.52378	2.51729	2.51189
CSys (µg/mL)	157	1	0	16.6152	20.305	17.8031	12.8694	10.6631	9.03424	7.80609	7.80609	7.09216	6.51722	6.03861	5.6298	5.27421	4.96125	4.68388	4.4371	4.21717	4.02107	3.84625	3.69049	3.55181	3.42843	3.31875	3.22132	3.13483	3.05813	2.99015	2.92996	2.87672	2.82967	2.78815	2.75155	2.71935	2.69105	2.66625	2.64456	2.62565	2.60921	2.59497	2.5827	2.57218	2.56322	2.55565	2.54933	2.54411	2.53988
CSys (µg/mL)	158	1	0	16.3066	19.9371	17.4665	12.32	10.1405	8.5898	7.45296	7.45296	6.82772	6.32268	5.89713	5.52796	5.20189	4.91104	4.65038	4.41635	4.2062	4.01759	3.84845	3.69691	3.56126	3.43991	3.33143	3.23453	3.14801	3.07083	3.00201	2.9407	2.88612	2.83758	2.79444	2.75616	2.72223	2.6922	2.66567	2.64227	2.62169	2.60362	2.58782	2.57405	2.5621	2.55177	2.54291	2.53536	2.52899	2.52367
CSys (µg/mL)	159	1	0	14.9053	18.2777	16.0983	11.4188	9.41939	7.98105	6.91213	6.91213	6.30775	5.81278	5.39244	5.02705	4.7052	4.41981	4.16609	3.94041	3.73977	3.56155	3.4034	3.2632	3.139	3.02907	2.93184	2.84588	2.76994	2.70289	2.64375	2.5916	2.54567	2.50526	2.46973	2.43855	2.41121	2.38729	2.3664	2.3482	2.33238	2.31868	2.30685	2.29668	2.288	2.28062	2.2744	2.26921	2.26494	2.26147
CSys (µg/mL)	160	1	0	16.3014	19.9464	17.6703	12.6091	10.4134	8.82314	7.63979	7.63979	6.967	6.42233	5.96468	5.56985	5.22339	4.9164	4.643	4.399	4.18113	3.98663	3.81313	3.65849	3.52075	3.39817	3.28916	3.19227	3.10622	3.02984	2.96209	2.90204	2.84886	2.8018	2.76021	2.72349	2.69111	2.6626	2.63754	2.61557	2.59633	2.57955	2.56495	2.55229	2.54137	2.53199	2.52399	2.51722	2.51155	2.50685
CSys (µg/mL)	161	1	0	18.1775	22.2714	19.9876	14.8231	12.3985	10.5459	9.10951	9.10951	8.22993	7.51807	6.92815	6.42955	6.00165	5.63036	5.30575	5.02057	4.76933	4.54766	4.35196	4.1792	4.02675	3.89229	3.7738	3.66946	3.57767	3.497	3.42619	3.36409	3.30972	3.26218	3.22069	3.18454	3.15312	3.12589	3.10236	3.08209	3.06472	3.0499	3.03734	3.02678	3.01798	3.01074	3.00487	3.00022	2.99665	2.99402
CSys (µg/mL)	162	1	0	14.3499	17.5396	15.59	11.1615	9.22104	7.80766	6.75256	6.75256	6.1477	5.65994	5.25204	4.90159	4.59499	4.32375	4.08227	3.86664	3.67386	3.50147	3.34737	3.20971	3.08681	2.97715	2.87937	2.79223	2.7146	2.64549	2.58399	2.52929	2.48067	2.43747	2.39911	2.36509	2.33493	2.30822	2.2846	2.26372	2.2453	2.22908	2.21481	2.20229	2.19133	2.18177	2.17345	2.16624	2.16002	2.15468
CSys (µg/mL)	163	1	0	17.8832	21.8369	19.1623	13.9069	11.5745	9.86482	8.58478	8.58478	7.85352	7.26717	6.77914	6.36081	5.99458	5.66953	5.37862	5.1171	4.88149	4.66908	4.47761	4.3051	4.14978	4.01004	3.88441	3.77155	3.67024	3.57936	3.49789	3.42492	3.35961	3.30121	3.24905	3.20251	3.16104	3.12414	3.09135	3.06228	3.03656	3.01385	2.99386	2.97633	2.96101	2.94767	2.93614	2.92622	2.91777	2.91063
CSys (µg/mL)	164	1	0	17.3739	21.27	18.9457	13.9041	11.5588	9.77939	8.40909	8.40909	7.57877	6.91033	6.35893	5.89473	5.49775	5.15437	4.85505	4.59284	4.36248	4.1598	3.98136	3.82428	3.68605	3.56449	3.45768	3.36391	3.28168	3.20963	3.14659	3.0915	3.04344	3.00158	2.96518	2.93362	2.90632	2.88277	2.86254	2.84524	2.83052	2.81808	2.80764	2.79898	2.79188	2.78615	2.78165	2.77821	2.77572	2.77407
CSys (µg/mL)	165	1	0	18.0113	22.0201	19.8399	14.8027	12.4211	10.5944	9.17493	9.17493	8.30194	7.59647	7.01275	6.51976	6.09648	5.72848	5.40571	5.1209	4.86867	4.64479	4.44587	4.26907	4.11195	3.97237	3.84847	3.73855	3.64112	3.55483	3.4785	3.41103	3.35147	3.29896	3.25273	3.21209	3.17644	3.14522	3.11795	3.0942	3.07358	3.05575	3.0404	3.02725	3.01607	3.00663	2.99874	2.99224	2.98697	2.98279
CSys (µg/mL)	166	1	0	16.49	20.1478	17.4972	12.5928	10.4348	8.86097	7.68643	7.68643	7.02027	6.48507	6.03866	5.65549	5.32003	5.02266	4.75714	4.5192	4.30565	4.11391	3.94183	3.78748	3.64915	3.52526	3.41441	3.31528	3.22671	3.14763	3.07707	3.01418	2.95817	2.90834	2.86406	2.82475	2.78991	2.75908	2.73185	2.70786	2.68676	2.66827	2.65211	2.63805	2.62588	2.61539	2.60642	2.59881	2.59242	2.58713
CSys (µg/mL)	167	1	0	14.9384	18.2399	16.2418	11.975	10.0162	8.54611	7.42479	7.42479	6.75923	6.22479	5.78232	5.40639	5.08056	4.7941	4.53983	4.3128	4.10943	3.92696	3.76314	3.61609	3.48417	3.36589	3.25993	3.16509	3.08029	3.00452	2.9369	2.87662	2.82293	2.77518	2.73278	2.69517	2.66189	2.63249	2.60658	2.58381	2.56385	2.54644	2.5313	2.51821	2.50696	2.49736	2.48925	2.48247	2.4769	2.4724
CSys (µg/mL)	168	1	0	13.9978	17.1037	15.1699	11.0898	9.20931	7.79318	6.71003	6.71003	6.06155	5.54119	5.1121	4.7501	4.43922	4.16878	3.93147	3.72207	3.5367	3.37232	3.22646	3.09702	2.98221	2.88043	2.79026	2.71045	2.63987	2.57751	2.52247	2.47393	2.4312	2.39361	2.3606	2.33167	2.30635	2.28425	2.26501	2.24831	2.23387	2.22143	2.21077	2.20169	2.19402	2.18759	2.18227	2.17793	2.17447	2.17178
CSys (µg/mL)	169	1	0	17.867	21.8739	19.3261	14.1661	11.8669	10.1715	8.891	8.891	8.14903	7.54581	7.03747	6.5975	6.20982	5.86447	5.55497	5.2768	5.02657	4.80147	4.5991	4.41732	4.25417	4.10786	3.97677	3.85941	3.75442	3.66057	3.57674	3.50194	3.43526	3.37587	3.32305	3.27613	3.23452	3.19768	3.16512	3.13643	3.1112	3.08909	3.06978	3.05299	3.03847	3.02599	3.01533	3.00633	2.9988	2.9926
CSys (µg/mL)	170	1	0	16.0029	19.5432	17.3484	12.7003	10.5558	8.94056	7.70553	7.70553	6.96672	6.37477	5.88731	5.47643	5.1237	4.81679	4.5473	4.30926	4.09827	3.9109	3.74439	3.59639	3.4649	3.34813	3.24453	3.15268	3.07131	2.99931	2.93565	2.87944	2.82986	2.78619	2.74779	2.71407	2.68453	2.65871	2.6362	2.61663	2.59969	2.58508	2.57255	2.56188	2.55285	2.54529	2.53903	2.53394	2.52988	2.52674
CSys (µg/mL)	171	1	0	16.283	19.8455	17.582	12.9089	10.7923	9.22099	8.03459	8.03459	7.34464	6.79386	6.33875	5.95151	5.61444	5.31627	5.04965	4.80967	4.59285	4.39658	4.21879	4.05773	3.91186	3.77983	3.6604	3.55242	3.45486	3.36677	3.28727	3.21559	3.15098	3.0928	3.04045	2.99338	2.95109	2.91314	2.87913	2.84868	2.82146	2.79717	2.77553	2.7563	2.73924	2.72416	2.71086	2.69919	2.68898	2.68011
CSys (µg/mL)	172	1	0	17.3171	21.1421	18.9561	14.0697	11.7818	10.0405	8.6968	8.6968	7.88034	7.22304	6.67994	6.22094	5.82592	5.48129	5.17776	4.90873	4.66934	4.45588	4.26534	4.09523	3.94337	3.80789	3.68709	3.57947	3.48367	3.39847	3.32276	3.25556	3.19598	3.14322	3.09655	3.05534	3.01901	2.98704	2.95897	2.93439	2.91293	2.89425	2.87806	2.8641	2.85212	2.84193	2.83332	2.82612	2.82019	2.8154
CSys (µg/mL)	173	1	0	14.8773	18.2009	16.1795	11.9178	9.98107	8.53629	7.43785	7.43785	6.79184	6.27097	5.83714	5.46622	5.14291	4.85739	4.60319	4.37579	4.17189	3.98889	3.82465	3.6773	3.54519	3.42685	3.32092	3.2262	3.14157	3.06602	2.99865	2.93864	2.88523	2.83777	2.79565	2.75833	2.72532	2.69618	2.67052	2.64799	2.62826	2.61106	2.59612	2.58321	2.57212	2.56268	2.55471	2.54805	2.54259	2.53819
CSys (µg/mL)	174	1	0	14.9702	18.2807	16.1982	11.5312	9.48282	7.99057	6.87829	6.87829	6.24107	5.73019	5.30582	4.94365	4.62873	4.35163	4.10611	3.88777	3.69331	3.52004	3.36569	3.22827	3.10602	2.99732	2.90075	2.81502	2.73896	2.67153	2.61179	2.55892	2.51215	2.47083	2.43436	2.40222	2.37392	2.34905	2.32724	2.30814	2.29147	2.27696	2.26437	2.25349	2.24413	2.23614	2.22935	2.22364	2.21889	2.215
CSys (µg/mL)	175	1	0	16.5788	20.2706	18.1165	13.0784	10.8631	9.24614	8.03677	8.03677	7.34249	6.782	6.31243	5.90797	5.55301	5.23788	4.9563	4.70389	4.47736	4.27404	4.09163	3.92809	3.78158	3.65043	3.53312	3.42826	3.33459	3.25099	3.17641	3.10995	3.05076	2.99811	2.95131	2.90977	2.87294	2.84034	2.81154	2.78615	2.7638	2.7442	2.72705	2.71211	2.69914	2.68795	2.67835	2.67017	2.66328	2.65753
CSys (µg/mL)	176	1	0	15.5574	19.0442	16.9063	12.4025	10.3455	8.80458	7.62908	7.62908	6.93159	6.36915	5.90191	5.50433	5.16001	4.85817	4.59154	4.35494	4.1445	3.95716	3.79036	3.64191	3.50987	3.39252	3.28831	3.19587	3.11393	3.04138	2.97721	2.92051	2.87049	2.82643	2.78766	2.75363	2.72382	2.69776	2.67506	2.65534	2.63829	2.62361	2.61105	2.60037	2.59137	2.58387	2.5777	2.57272	2.5688	2.56582
CSys (µg/mL)	177	1	0	17.6481	21.6088	19.4411	14.1023	11.7079	9.93375	8.58997	8.58997	7.7977	7.1568	6.62185	6.16457	5.76718	5.41815	5.10968	4.83614	4.59319	4.37731	4.18552	4.01518	3.86397	3.72981	3.61084	3.50539	3.41197	3.32923	3.256	3.1912	3.13388	3.08322	3.03846	2.99895	2.96408	2.93334	2.90627	2.88245	2.86151	2.84314	2.82704	2.81296	2.80067	2.78997	2.78068	2.77265	2.76572	2.75978
CSys (µg/mL)	178	1	0	17.7846	21.7241	19.044	13.7284	11.3322	9.55513	8.21273	8.21273	7.42784	6.79979	6.28164	5.84348	5.46612	5.13703	4.8477	4.59212	4.36577	4.16508	3.9871	3.8293	3.68945	3.56561	3.45601	3.35911	3.2735	3.19793	3.13128	3.07257	3.02091	2.97551	2.93566	2.90075	2.87023	2.84359	2.82042	2.80031	2.78292	2.76796	2.75514	2.74423	2.73501	2.7273	2.72093	2.71574	2.7116	2.70841
CSys (µg/mL)	179	1	0	17.3706	21.2699	18.6367	13.0697	10.6744	8.94832	7.66955	7.66955	6.94737	6.365	5.87876	5.46288	5.10177	4.78552	4.50739	4.26236	4.04642	3.8562	3.68876	3.54148	3.41205	3.2984	3.19868	3.11124	3.03464	2.96759	2.90895	2.85771	2.813	2.77403	2.74011	2.71065	2.68511	2.66302	2.64397	2.6276	2.61359	2.60165	2.59154	2.58304	2.57596	2.57013	2.5654	2.56165	2.55875	2.5566
CSys (µg/mL)	180	1	0	16.8963	20.6977	18.2613	12.9423	10.6419	8.9773	7.73869	7.73869	7.03421	6.46346	5.98448	5.57259	5.21298	4.89631	4.61628	4.36823	4.14847	3.95385	3.78163	3.62936	3.49484	3.3761	3.27137	3.17907	3.09777	3.02623	2.96332	2.90807	2.85958	2.81709	2.7799	2.7474	2.71905	2.69438	2.67297	2.65444	2.63845	2.62472	2.61299	2.60303	2.59464	2.58762	2.58184	2.57714	2.57341	2.57052
CSys (µg/mL)	181	1	0	15.9624	19.5121	17.334	12.4483	10.3358	8.81177	7.6822	7.6822	7.04679	6.5332	6.10077	5.72571	5.39413	5.09767	4.83105	4.59065	4.37373	4.17803	4.0016	3.84265	3.69957	3.57086	3.45515	3.35119	3.25784	3.17406	3.0989	3.03152	2.97114	2.91707	2.86869	2.82543	2.78679	2.7523	2.72155	2.69417	2.66983	2.64822	2.62907	2.61214	2.5972	2.58407	2.57255	2.56249	2.55375	2.54618
CSys (µg/mL)	182	1	0	16.8348	20.6236	18.3287	13.4164	11.1445	9.42719	8.10822	8.10822	7.31348	6.67352	6.14503	5.69949	5.31795	4.98759	4.69941	4.44689	4.22504	4.02989	3.85816	3.70707	3.5742	3.45745	3.35493	3.26501	3.1862	3.11723	3.05692	3.00428	2.95839	2.91846	2.88379	2.85376	2.82782	2.80548	2.78632	2.76997	2.75608	2.74438	2.73461	2.72652	2.71993	2.71466	2.71056	2.70747	2.70529	2.70391
CSys (µg/mL)	183	1	0	14.7648	18.0739	16.0039	11.6479	9.63665	8.11854	6.95453	6.95453	6.25395	5.69104	5.22736	4.83751	4.5046	4.21711	3.967	3.74838	3.55678	3.38864	3.24102	3.11143	2.99772	2.89802	2.81067	2.73422	2.66737	2.60899	2.55807	2.51372	2.47515	2.44167	2.41266	2.3876	2.36601	2.34746	2.3316	2.31809	2.30666	2.29706	2.28906	2.28247	2.27712	2.27287	2.26957	2.26711	2.2654	2.26433
CSys (µg/mL)	184	1	0	15.1973	18.5345	16.4522	12.0614	10.0422	8.52666	7.3725	7.3725	6.68787	6.14158	5.69278	5.31456	4.98925	4.70516	4.45443	4.23158	4.03269	3.85473	3.69534	3.5525	3.42453	3.3099	3.20728	3.11547	3.03337	2.96002	2.89451	2.83606	2.78393	2.73749	2.69615	2.65938	2.62672	2.59773	2.57205	2.54932	2.52925	2.51157	2.49601	2.48237	2.47045	2.46006	2.45106	2.44329	2.43663	2.43097
CSys (µg/mL)	185	1	0	16.392	20.0313	17.9747	13.3654	11.2141	9.57988	8.32043	8.32043	7.55851	6.94472	6.43679	6.00663	5.63558	5.31114	5.02477	4.77046	4.54376	4.34127	4.16025	3.99838	3.85368	3.72439	3.60895	3.50596	3.41415	3.33239	3.25963	3.19497	3.13756	3.08665	3.04157	3.00171	2.96654	2.93555	2.90833	2.88447	2.86362	2.84547	2.82974	2.81618	2.80455	2.79466	2.78633	2.77938	2.77368	2.7691
CSys (µg/mL)	186	1	0	17.4129	21.2318	18.9678	14.0573	11.7942	10.0937	8.79706	8.79706	8.02869	7.41434	6.90768	6.47833	6.10652	5.7793	5.48813	5.22718	4.99232	4.78047	4.58918	4.41642	4.26044	4.11969	3.99275	3.87837	3.77537	3.68269	3.59937	3.52451	3.45731	3.39705	3.34306	3.29474	3.25155	3.21299	3.17861	3.14802	3.12084	3.09676	3.07546	3.05669	3.04019	3.02575	3.01317	3.00227	2.99289	2.98487
CSys (µg/mL)	187	1	0	14.564	17.7985	15.8692	11.6938	9.76035	8.29936	7.17809	7.17809	6.5037	5.9609	5.51186	5.13168	4.80398	4.5178	4.26568	4.04233	3.84382	3.66709	3.50966	3.36943	3.24456	3.13344	3.03465	2.94689	2.869	2.79994	2.73878	2.68468	2.63688	2.59471	2.55757	2.52492	2.49628	2.47121	2.44934	2.43031	2.41382	2.3996	2.3874	2.37701	2.36822	2.36087	2.3548	2.34987	2.34596	2.34295
CSys (µg/mL)	188	1	0	15.6405	19.1308	16.9388	12.3791	10.2982	8.7395	7.55004	7.55004	6.84244	6.2713	5.79665	5.39291	5.04356	4.73773	4.46803	4.22917	4.01713	3.82874	3.66133	3.51261	3.38057	3.2634	3.15952	3.06748	2.986	2.91392	2.85022	2.79398	2.74436	2.70065	2.66219	2.6284	2.59876	2.57281	2.55016	2.53042	2.51328	2.49846	2.48569	2.47475	2.46544	2.45758	2.45101	2.44558	2.44117	2.43768
CSys (µg/mL)	189	1	0	16.5432	20.2317	18.121	13.4257	11.234	9.56804	8.28273	8.28273	7.50275	6.87354	6.35267	5.91193	5.53253	5.20182	4.91105	4.65398	4.42595	4.22334	4.04317	3.88295	3.74052	3.61399	3.50165	3.402	3.31369	3.23549	3.16634	3.10524	3.05132	3.00382	2.96203	2.92532	2.89316	2.86503	2.8405	2.81917	2.8007	2.78477	2.77111	2.75946	2.74961	2.74135	2.73452	2.72895	2.72451	2.72107
CSys (µg/mL)	190	1	0	15.4557	18.9089	16.5394	11.6516	9.59169	8.12844	7.05487	7.05487	6.46395	5.98346	5.57613	5.2212	4.90689	4.62625	4.37476	4.14918	3.9469	3.76567	3.60345	3.45837	3.32875	3.21301	3.10973	3.01763	2.93555	2.86243	2.79734	2.73943	2.68794	2.64221	2.60161	2.56562	2.53375	2.50555	2.48065	2.4587	2.43939	2.42243	2.40758	2.39462	2.38335	2.37358	2.36517	2.35797	2.35184	2.34669
CSys (µg/mL)	191	1	0	16.1184	19.7303	17.2817	12.1535	9.96747	8.40211	7.24722	7.24722	6.60222	6.07993	5.64065	5.26153	4.92917	4.63532	4.37449	4.14262	3.93651	3.75341	3.59087	3.44674	3.31903	3.20596	3.10593	3.0175	2.9394	2.87045	2.80965	2.75608	2.70893	2.66748	2.63109	2.59919	2.57128	2.54692	2.5257	2.50727	2.49132	2.47757	2.46578	2.45572	2.44721	2.44007	2.43414	2.42929	2.4254	2.42237
CSys (µg/mL)	192	1	0	14.915	18.1803	16.3001	12.1096	10.1489	8.65856	7.51075	7.51075	6.8156	6.25742	5.79698	5.40795	5.07272	4.77948	4.5202	4.28926	4.08262	3.89721	3.7306	3.5808	3.44609	3.32498	3.21614	3.11837	3.03058	2.95179	2.88112	2.81776	2.76099	2.71013	2.66461	2.62389	2.58747	2.55493	2.52588	2.49995	2.47685	2.45627	2.43796	2.4217	2.40727	2.39449	2.38318	2.3732	2.36442	2.35671
CSys (µg/mL)	193	1	0	16.6814	20.395	18.3345	13.6582	11.4663	9.79511	8.50239	8.50239	7.71478	7.0783	6.55046	6.10295	5.71687	5.37951	5.08211	4.81843	4.58385	4.37478	4.18831	4.02199	3.87369	3.74154	3.62387	3.5192	3.42617	3.34357	3.27032	3.20544	3.14804	3.09735	3.05264	3.01329	2.97873	2.94845	2.922	2.89897	2.879	2.86176	2.84696	2.83434	2.82367	2.81474	2.80736	2.80137	2.79662	2.79298
CSys (µg/mL)	194	1	0	16.9196	20.6399	18.2935	13.4372	11.2375	9.6025	8.36504	8.36504	7.64206	7.06201	6.58049	6.16931	5.81065	5.49316	5.20942	4.95441	4.72453	4.51702	4.32964	4.16045	4.00778	3.87008	3.74599	3.63422	3.53362	3.44313	3.3618	3.28874	3.22316	3.16434	3.11163	3.06444	3.02223	2.98453	2.95088	2.92091	2.89426	2.87059	2.84963	2.83111	2.81479	2.80047	2.78793	2.77702	2.76758	2.75945
CSys (µg/mL)	195	1	0	14.2282	17.3629	15.4042	11.3226	9.46999	8.0925	7.05085	7.05085	6.44385	5.95903	5.55852	5.21806	4.92219	4.661	4.42804	4.21893	4.03056	3.86059	3.70712	3.56858	3.44357	3.33084	3.22928	3.13785	3.0556	2.98169	2.91532	2.85579	2.80244	2.7547	2.71201	2.6739	2.63994	2.60972	2.58288	2.55911	2.5381	2.5196	2.50335	2.48915	2.4768	2.46612	2.45695	2.44915	2.44258	2.43712
CSys (µg/mL)	196	1	0	17.3473	21.2351	19.1228	14.2425	11.9335	10.1606	8.78127	8.78127	7.93121	7.24377	6.67517	6.1957	5.78511	5.42943	5.1188	4.84603	4.6057	4.39356	4.20612	4.04048	3.89414	3.76494	3.65095	3.55047	3.46201	3.38421	3.31588	3.25596	3.2035	3.15766	3.11769	3.08294	3.0528	3.02675	3.00434	2.98515	2.96881	2.955	2.94344	2.93387	2.92606	2.91982	2.91496	2.91133	2.90879	2.90722
CSys (µg/mL)	197	1	0	14.9734	18.3034	16.2722	11.9711	10.0043	8.53142	7.4091	7.4091	6.7447	6.21032	5.76706	5.38989	5.06271	4.77503	4.51984	4.29225	4.08869	3.90636	3.74298	3.5966	3.4655	3.34817	3.24322	3.14941	3.06562	2.99083	2.92412	2.86466	2.8117	2.76458	2.72269	2.68549	2.6525	2.62326	2.5974	2.57457	2.55444	2.53674	2.52121	2.50763	2.4958	2.48552	2.47664	2.46901	2.4625	2.457
CSys (µg/mL)	198	1	0	17.8217	21.7915	19.5004	14.4577	12.1227	10.3585	9.00453	9.00453	8.19234	7.53809	6.99583	6.53548	6.13734	5.78836	5.47972	5.20521	4.96025	4.74132	4.54554	4.37045	4.21394	4.07413	3.94933	3.83801	3.73881	3.65048	3.57191	3.50209	3.44011	3.38516	3.33651	3.2935	3.25555	3.22212	3.19275	3.16701	3.14452	3.12495	3.10798	3.09334	3.0808	3.07013	3.06113	3.05364	3.04749	3.04254
CSys (µg/mL)	199	1	0	15.9453	19.5136	17.4496	12.5735	10.4124	8.82371	7.62768	7.62768	6.93051	6.36617	5.89384	5.48865	5.13524	4.82384	4.54787	4.30262	4.08443	3.89029	3.71763	3.56416	3.42784	3.30684	3.1995	3.10433	3.02001	2.94535	2.87927	2.82083	2.76918	2.72357	2.68332	2.64784	2.6166	2.58913	2.565	2.54385	2.52535	2.50919	2.49513	2.48292	2.47236	2.46326	2.45547	2.44883	2.44322	2.43853
CSys (µg/mL)	200	1	0	15.9727	19.5131	17.5334	13.0524	10.9507	9.34885	8.11116	8.11116	7.35832	6.75186	6.25059	5.8269	5.46225	5.14416	4.86401	4.6157	4.39474	4.19767	4.02173	3.8646	3.7243	3.59908	3.4874	3.38788	3.29927	3.22045	3.15042	3.08826	3.03317	2.98439	2.94129	2.90326	2.86978	2.84037	2.8146	2.7921	2.77251	2.75555	2.74092	2.72839	2.71773	2.70875	2.70127	2.69514	2.69021	2.68636
[truncated: 953 more columns]

[truncated: 3 more sheets: AUC0(Sub)(CPlasma), AUC3(Sub)(CPlasma), AUC]
