# Supplementary material for: The Impact of Low Cardiac Output on Propofol Pharmacokinetics across Age Groups—An Investigation Using Physiologically Based Pharmacokinetic Modelling
Source: Pharmaceutics. 2022 Sep 16;14(9):1957. doi: 10.3390/pharmaceutics14091957 (PMC9502676; doi:10.3390/pharmaceutics14091957)
Supplement: Supplementary file 1 [file pharmaceutics-14-01957-s001.zip › Propofol paediatric Model.xlsx]

## Sheet: Summary
Simcyp Population Based Simulator
2022-07-05 19:31:34
Simcyp Version 19 (19/12/2019)
Input Parameters
Output Parameters
Input Parameters
Workspace	Propofol_Retrogrademodel_OO_etal_Neonate
Substrate	Wsp-Propofol_retrograde_Cyp2B6
Simulation Mode	PKPD Parameters + PKPD Profiles
	Substrate				Substrate
Compound Name	Wsp-Propofol_retrograde_Cyp2B6
Mol Weight (g/mol)	178.3			Distribution Model	Full PBPK Model
log P	3.8			Vss	Predicted
Compound Type	Neutral			Prediction Method	Method 2
pKa 1	n/a
pKa 2	n/a			Clearance Type	Enzyme Kinetics
B/P	1.27689
Haematocrit	45
fu	script
Trial Design
					Substrate
Population Name	Sim-Paediatric			Prandial State	Fasted
Use Pop Representative	No			Route	Custom
Population Size	200
Number of Trials	1
No. of Subjects per Trial	200
Start Day/Time	Day 1, 09:00
End Day/Time	Day 1, 11:00
Study Duration (h)	2
Sampling Time	Pre-defined Uniform
Sampling Site Selection	Off
Output Parameters
PKPD Parameters	Mean	Median	Geometric mean	Confidence Interval		Can be found in Excel sheet
CL (L/h)	2.91038	2.68057	2.62731	2.49056	2.77157	Clearance Trials SS
CLpo (L/h)	5.50378	4.00651	4.36819	4.05316	4.70771	Clearance Trials SS
fa (Sub)	0.875448	0.92985	0.861937	0.843626	0.880645	Clearance Trials SS
Fg (Sub)	0.918766	0.927793	0.917358	0.911347	0.923409	Clearance Trials SS
Fh (Sub)	0.772943	0.800198	0.760668	0.743695	0.778029	Clearance Trials SS
F (Sub)	0.620655	0.629883	0.601464	0.58306	0.620448	Clearance Trials SS
Vss (Subs)(L/Kg)	11.3266	11.1426	11.2364	11.0722	11.4031	Distribution - Vols
PKPD Profiles	Mean	Median	Geometric mean	Confidence Interval		Can be found in Excel sheet
CMax (µg/mL)	18.1372	18.0272	18.0782	17.9079	18.25	AUC
TMax (h)	0.00516003	0.00560334	0.00509597	0.00500166	0.00519206	AUC
AUC (µg/mL.h)	0.182346	0.182301	0.181752	0.18004	0.183482	AUC
CMin (µg/mL)	0	0	n/a	n/a	n/a	AUC
CL (Dose/AUC)(L/h)	39.4305	39.4248	39.0009	38.3262	39.6875	AUC

## Sheet: Input Sheet
Simcyp Population Based Simulator
2022-07-05 19:31:35
Simcyp Version 19 (19/12/2019)
Substrate			Trial Design			Simulation Toolbox			Software Version Detail
Compound Name	Wsp-Propofol_retrograde_Cyp2B6		Use Pop Representative	No		Random Number Generator	Mersenne Twister (MT19937)		Simulation Duration(seconds)	12
Version number	Not applicable		Population Size	200		Seed	Fixed		Windows Version	Windows 10
Molecule Type	Small Molecule		Number of Trials	1		Seed Value	1		Excel Version	Excel 2016
Route	Custom		No of Subjects per Trial	200		Sampling Site Selection	Off		Source File Location	C:\Program Files\Simcyp Simulator V19\Screens\
			Population name	Sim-Paediatric		Memory Size	4000000		Excel Embedded Workspace	No
PhysChem and Blood Binding			Version number	19.0 .0					Simcyp Version	19.0.96.0
			Minimum Age (years)	0		Paediatric Bins			Licence Details
Mol Weight (g/mol)	178.3		Maximum Age (years)	0.083		Age
log P	3.8		Propn. of Females	0.5		Bin 1	0.00 - 0.08		User name	AD\mbzoo
Compound Type	Neutral		Fix Individual Trial Design	No		Bin 2	0.08 - 2.00		Domain name	ad.nottingham.ac.uk
Extended Clearance Classification System	Class 2 - Metabolism		Prandial State	Fasted		Bin 3	2.00 - 6.00		Computer name	LUIN68894
BP input type	Predicted		PKPD Parameters	On		Bin 4	6.00 - 12.00		Simcyp Standard licence: agreement identifier
B/P	1.27689		PKPD Profiles	On		Bin 5	12.00 - 18.00		Simcyp Standard licence: agreement type	Academic teaching and research
Haematocrit	45		Start Day/Time	Day 1, 09:00		Bin 6	18.00 - 25.00		Simcyp Standard licence: organisation	University of Nottingham
fu Input	script		End Day/Time	Day 1, 11:00					Simcyp Standard licence: machine identifier	28C533CC-3119-11B2-A85C-E23748301C39
Reference Binding Component	HSA		Study Duration (h)	2		Body Weight			Simcyp Standard licence: source	Desktop
Protein Reference Conc (g/L)	45					Bin 1	0.00 - 4.50		Simcyp Standard licence: usage	Client
% Bound to Lipoprotein	0		Sub : Route	Custom		Bin 2	4.50 - 12.50		Simcyp Standard licence: issued	Mon Sep 13 10:15:46 2021
% Bound to Lipoprotein (CV %)	0					Bin 3	12.50 - 21.00		Simcyp Standard licence: valid from	Sun Sep 12 23:00:00 2021
			AUC Calculations (Substrate)			Bin 4	21.00 - 40.00		Simcyp Standard licence: valid to	Mon Sep 5 22:59:59 2022
Absorption			Calculated AUCt first dose	Yes		Bin 5	40.00 - 70.00		Simcyp Paediatric licence: agreement identifier
			Calculated AUC_INF	Yes		Bin 6	70.00 - 100.00		Simcyp Paediatric licence: agreement type	Academic teaching and research
			Calculated AUCt last dose	No					Simcyp Paediatric licence: organisation	University of Nottingham
Distribution			Integrated AUCt first dose	Yes		BSA			Simcyp Paediatric licence: machine identifier	28C533CC-3119-11B2-A85C-E23748301C39
			Integrated AUCt last dose	No		Bin 1	0.00 - 0.32		Simcyp Paediatric licence: source	Desktop
Distribution Model	Full PBPK Model		Integrated AUCt user interval	No		Bin 2	0.32 - 0.54		Simcyp Paediatric licence: usage	Client
Replacement Organ?	No		Method	Linear Trapezoidal		Bin 3	0.54 - 0.80		Simcyp Paediatric licence: issued	Mon Sep 13 10:15:46 2021
Organ Replaced	n/a		Weighting Option	Weighted by reciprocal of prediction squared (1/ŷ²)		Bin 4	0.80 - 1.25		Simcyp Paediatric licence: valid from	Sun Sep 12 23:00:00 2021
User-defined Additional Organ	No					Bin 5	1.25 - 1.70		Simcyp Paediatric licence: valid to	Mon Sep 5 22:59:59 2022
Type	n/a					Bin 6	1.70 - 3.00
Vss input type	Predicted
Vss (L/kg)	19.298
Prediction Method	Method 2					ODE Solver Settings
Concentration-dependent volume	No
log Po:w	3.8					No. Differential Equations	31
logP vo:w input type	Predicted					Solver sampling interval (h)	0.01
logP vo:w Prediction Method	Hansch					Solver sampling interval (h) (ADAM)	0.05
logP vo:w Hansch a	1.115					Sampling Time	Pre-defined Uniform
logP vo:w Hansch b	-1.35					Number of time samples	1000
logP vo:w	2.887
Compound Type	Neutral					Negative Cut-off	1e-08
Adipose input type	Predicted					Positive Cut-off	1e-20
Adipose	41.0299					Differential Solver	5th-order Runge-Kutta
Bone input type	Predicted					Maximum number of steps	1000000
Bone	31.5927					Relative Tolerance	1e-15
Brain input type	Predicted					Relative Tolerance when ADAM is used	1e-09
Brain	28.9084					Integration error tolerance	0.001
Gut input type	Predicted
Gut	22.8052					ADAM Model Specific Settings
Heart input type	Predicted
Heart	7.04977					Solubility Cap (mg/mL)	500
Kidney input type	Predicted					Use UBL fluid volumes	Off
Kidney	10.9071					Apply Minimum Mass Limit(ADAM)	Off
Liver input type	Predicted					Minimum Mass Limit	n/a
Liver	18.0392					Minimum Norm. Scalar (pH surface model)	1e-11
Lung input type	Predicted					Newton Convergence Tol (pH surface model)	1e-14
Lung	2.47542					Time Interval (pH surface model)	0.01
Muscle input type	Predicted					ConstDR (MBO Model)	10000
Muscle	11.075					Radius Rate Cap (PPB Model)(µm/h)	500
Skin input type	Predicted					Precipitation Delay Time (Sec)	0.001
Skin	13.5225					CR Cut-off (%)	99.9
Spleen input type	Predicted
Spleen	11.1114					LUA Scripting(ADAM)	Off
Pancreas input type	Predicted
Pancreas	18.6479
Kp Scalar	1.2
Smoothing Function	Off
Lipid Binding Scalar	1
Use Pvo:w for Neutral Lipid Partition in All Tissues	No
Elimination
Clearance Type	Enzyme Kinetics
FI Correction	Not used
PLR Correction	Not Used
In vitro metabolic system	Recombinant
Pathway	4-OH
Enzyme	CYP2B6
CLint (µL/min/pmol)	39.1841
fu mic	1
Pathway	4-OH
Enzyme	CYP2C9
Genotype	*1/*1
CLint (µL/min/pmol)	0.606
fu mic	1
In vitro metabolic system	Recombinant
Pathway	Pathway 1
Enzyme	UGT1A9
CLint (µL/min/mg protein)	360
fu mic	1
rUGTSystem	User
rUGTScalar - Liver	1
rUGTScalar - Intestine	1
rUGTScalar - Kidney	19.5
Feed formed renal metabolite into kidney	No
Use Allelic variants for Enzyme 1	No
Enzyme	CYP2C9
Use Allelic variants for Enzyme 2	No
Enzyme	CYP1A2
Gut Lumen metabolism	in-active
Ontogeny Profile	No Profile Used
Biliary CLint (Hep) (µL/min/106)	0
CV Biliary CLint (Hep) (%)	30
Ontogeny Profile	No Profile Used
Active enterohepatic recirculation for IV dose	No
Active Hepatic Scalar (Net)	1
CL R (L/h)	0
Transport
Organ/Tissue	Tumour
Tumour Permeability limited Model	Off

## Sheet: Ode State Info
Index	Model	State variable name (no PK interaction)
0	0	Substrate liver concentration
1	0	Substrate systemic concentration
2	0	Substrate adipose concentration
3	0	Substrate arterial blood concentration
4	0	Substrate bone concentration
5	0	Substrate brain concentration
6	0	Substrate heart concentration
7	0	Substrate gi tract (tissue) concentration
8	0	Substrate kidney concentration
9	0	Substrate lung concentration
10	0	Substrate muscle concentration
11	0	Substrate spleen concentration
12	0	Substrate skin concentration
13	0	Substrate additional organ concentration
14	0	Substrate pancreas concentration
15	0	Substrate lymph concentration
16	0	Substrate amount in dosed absorption compartment
17	0	Substrate renal amount excreted
18	0	Substrate feto-placental concentration
19	0	CYP2B6 amount in gut
20	0	CYP2B6 amount in colon
21	0	CYP2B6 amount in liver
22	0	CYP2B6 amount in kidney
23	0	CYP2C9 amount in gut
24	0	CYP2C9 amount in colon
25	0	CYP2C9 amount in liver
26	0	CYP2C9 amount in kidney
27	0	UGT1A9 amount in gut
28	0	UGT1A9 amount in colon
29	0	UGT1A9 amount in liver
30	0	UGT1A9 amount in kidney

## Sheet: Sim-Paediatric
Population		Population : Liver		Population : Kidney		Population : Skin		Population : GI Tract		Population : Lung		Population : Tissue Composition		Population : Blood		Population : Tissue Blood Flow Rates		Population : Brain		Population : Additional Organ		Population : FcRn IgG		Population : Lymph		Population : Target		Population : Tumour		Population : Female Reproductive System		Population : Paediatric
Ref Bodyweight (kg)	80.7056	Liver model	Well Stirred	Male Baseline 1	76.5	MechDermA - Forearm		Dep of Duod. on BSA:C1 Len	0.205	Ventillation-perfusion ratio: Mean	1	Tissue composition	Scripted	Haematocrit Mean : Male	Scripted	Tissue Blood Flow Rates	Scripted	CSF Flow		Additional Organ : EW (%)	14.1	IgG Concentration (µM)	80.7	% of total lymph flow (Adipose)	12.8	Target1 Name	TNF-alpha	Tumour : Volume (mL)	20	Vagina surface area (cm2)	87.5	Enzyme	CYP2B6
Maximum Age (years)	25	Liver weight : Slope vs BSA	0.722	Male Baseline 1 CV (%)	16.1	SCorneum Thickness (µm) : Male	15.7	Dep of Duod. on BSA:Exp Len	0.55	Ventillation-perfusion ratio: CV (%)	35	Adipose : IW (%)	3.9	Haematocrit CV (%) : Male	6.5			CSF production rate	Scripted	Additional Organ : IW (%)	3.9	IgG Concentration CV (%)	12.6	% of total lymph flow (Bone)	0	Target1 Rmax (µM)	0	Tumour : CV (%)	30	Vagina surface area CV (%)	9	Adult Max	1
Minimum Age (years)	0	Operational Concentrations	Liver Compartment (Outlet)	Male Age Cut-Off	61	SCorneum Thickness CV (%) : Male	33	Dep of Duod. on BSA:C1 Dia	0.033	Volume Airway (L): Mean	0.1	Adipose : AP (mg/g)	0.4	Haematocrit Mean : Female	Scripted			Bulk flow from brain to CSF (% CSF production)	25	Additional Organ : NL (%)	79	IgG KD (µM)	0.728	% of total lymph flow (Brain)	1.05	Target1 Rmax CV (%)	30	Tumour : Density (g/mL)	1	Cervix surface area (cm2)	16.9	Fbirth	0.277
Propn of Females	0.5	Liver weight	Script	Male Age Cut-off Baseline	81.2	SCorneum Thickness (µm) : Female	15.7	Dep of Duod. on BSA:Exp Dia	0.383	Volume Airway (L): CV (%)	30	Adipose : KpALB	0.037	Haematocrit CV (%) : Female	7.1			Bulk flow from brain to CSF (% CSF production) CV (%)	0	Additional Organ : NP (%)	0.2	IgG KD CV (%)	10	% of total lymph flow (Stomach and Oesophagus)	12	Target1 Kdeg (1/h)	0	Tumour : Weight (g)	20	Cervix surface area CV (%)	21	Age50 (X50)	1.537
BSA C1 Param	0.007184	Liver Volume Male CV (%)	0	Male Age Cut-Off CV1 (%)	27.4	SCorneum Thickness CV (%) : Female	34	Jej-Ileum Ratio:Jej Len	0.4	Volume Alveoli (L): Mean	5.6	Adipose : KpLPP	0.068	AGP Mean : Male	Scripted			CSF spinal absorption rate (%)	38	Additional Organ : AP (mg/g)	0.4	IgG KDcomplex (µM)	2.912	% of total lymph flow (Heart)	1	Target1 Kdeg CV (%)	30	Tumour : CV (%)	0	Vagina : cervix surface correlation coefficient	0	n(Agen)	1.73
BSA Wt Exp	0.425	Liver Volume Female CV (%)	0	Male Age Cut-Off CV2 (%)	21.2	SCorneum Fat (%) : Male	12.9	Enterocyte Volume (L)	0.517	Volume Alveoli (L): CV (%)	10	Bone : IW (%)	34.1	AGP CV (%) : Male	15			CSF spinal absorption rate CV (%)	0	Additional Organ : KpALB	0.037	IgG KDcomplex CV (%)	30	% of total lymph flow (Kidney)	8.5	Target1 Kshed (1/hr)	0	Tumour : Blood Flow (mL/min/mL tumour)	0.76	Epithelium thickness (mm)	1	Age-cap	25
BSA Ht Exp	0.725	Liver Volume Prediction Method	Default	Female Baseline 1	57	SCorneum Fat CV (%) : Male	30	Jej-Ileum Ratio:Jej/Duo Dia C1	0.8125	Volume Pulmonary Capilliary Blood (L): Mean	0.089	Bone : AP (mg/g)	0.67	AGP Mean : Female	Scripted			Bulk flow from spinal CSF to cranial CSF (% CSF spinal absorption rate)	90	Additional Organ : KpLPP	0.068	IgG CLcat,free (L/h)	0.0175	% of total lymph flow (Liver)	33	Target1 Kshed CV (%)	30	Tumour : CV (%)	30	Epithelium thickness CV (%)	40	Additional Function	No
HT & WT option	Scripted	Liver Density	1080	Female Baseline CV (%)	20.4	SCorneum Fat (%) : Female	12.9	Jej-Ileum Ratio:Il/Duo Dia C1	0.725	Volume Pulmonary Capilliary Blood (L): CV (%)	20	Bone : KpALB	0.1	AGP CV (%) : Female	13			Bulk flow from spinal CSF to cranial CSF (% CSF spinal absorption rate) CV (%)	0	Additional Organ : membrane potential : (mV)	-41	IgG CLcat,free CV (%)	10	% of total lymph flow (Lung)	3	Target1 Lambda (1/h)	0	Tumour : Lymph Flow (mL/min/mL of tumour)	0	Stroma thickness (mm)	1.2
Male Body Weight CV (%)	15	MPPGL : Baseline	1.407	Female Age Cut-Off 1	48	SCorneum Fat CV (%) : Female	30	Dep of LG on BSA :C1	5.231	Volume Epithelial Lining Fluid (L): Mean	0.025	Bone : KpLPP	0.05	HSA : Male	Scripted			CSF Volume		Additional Organ : subcell membrane potential (mV)	10	Ontogeny Profile	No Profile Used	% of total lymph flow (Muscle)	16	Target2 Name	IgE	Tumour Tissue Type	Generic	Stroma thickness CV (%)	44	Enzyme	CYP2C9
Male Height CV (%)	5.7	MPPGL : C1	0.01579	Female Age Cut-Off Baseline 2	66.2	VEpidermis Thickness (µm) : Male	50.7	Dep of LG on BSA :Exp	0.414	Volume Epithelial Lining Fluid(L): CV (%)	20	Brain : IW (%)	67.8	HSA CV (%) : Male	10			CSF (% Brain volume) : Male	Scripted	Additional Organ : subcell pH	5	FcRn Concentration (µM)	40	% of total lymph flow (Pancreas)	0.3	Target2 Rmax (µM)	0	Tumour : EW (%)	32.47	Cervix thickness (mm)	30.2	Adult Max	0.98
Female Body Weight CV (%)	10	MPPGL : C2	-0.0003824	Female Age Cut-off 1 CV 1 (%)	26.5	VEpidermis Thickness CV (%) : Male	24	Dep of LG on BSA :CV LG Len	20	Surface Area Airway (m2): Mean	1.5	Brain : AP (mg/g)	0.4	HSA : Female	Scripted			CSF (% Brain volume) : Female	Scripted	Additional Organ : IW pH	7	FcRn Coefficient	0.95	% of total lymph flow (Skin)	7.3	Target2 Rmax CV (%)	30	Tumour : IW (%)	53.76	Cervix thickness CV (%)	21	Fbirth	0.17
Female Height CV (%)	5.2	MPPGL : C3	2.37e-06	Female Age Cut-off 1 CV 2 (%)	22.8	VEpidermis Thickness (µm) : Female	53.8	S9PPI : input type	Predicted	Surface Area Airway (m2): CV (%)	50	Brain : KpALB	0.048	HSA CV (%) : Female	10			Spinal (% CSF) : Male	30	Additional Organ Local pH : EW	7.4	Additional Clearance (L/h)	0.0017	% of total lymph flow (Spleen)	1	Target2 Kdeg (1/h)	0	Tumour : NL (%)	0.96	Luminal fluid volume (mL)	0.5	Age50 (X50)	0.0157
Male Distribution	Uniform	MPPGL : CV (%)	26.9	Female Age Cut-Off 2	78	VEpidermis Thickness CV (%) : Female	19	S9PPI : Mean	5320	Surface Area Alveoli (m2): Mean	140	Brain : KpLPP	0.041	Other Mean : Male	0			Spinal (% CSF) : Female	30	Additional Organ Local pH : IW	7	Additional Clearance CV (%)	10	% of total lymph flow (Additional Organ)	0	Target2 Kdeg CV (%)	30	Tumour : NP (%)	0.98	Luminal fluid volume CV (%)	30	n(Agen)	0.53
Female Distribution	Uniform	CPPGL : Baseline	28.8945	Female Age Cut-Off Baseline 3	79.5	VEpidermis Fat (%) : Male	3	MPPI : Mean	2978	Surface Area Alveoli (m2): CV (%)	30	Gut : IW (%)	45.1	Other CV (%)(%) : Male	0			Intracranial blood volume (% Brain Volume) : Male	5	Additional Organ : subcell fraction (%)	0	Lymphatic Clearance (L/h)	0	Lymph flow rate (L/h/kg)	0.00385518	Target2 Kshed (1/hr)	0	Tumour : AP (mg/g)	2.4	Luminal fluid pH	4.8	Age-cap	5
Abundance : CYP1A2 PM Freq	0	CPPGL : Correlation Coefficient	1.31032	Female Age Cut-Off 2 CV 1 (%)	38.3	VEpidermis Fat CV (%) : Male	30	MPPI : CV (%)	30	Lobe Distribution Percentage (%) Ventillation Rate RL	25.9	Gut : AP (mg/g)	2.84	Other Mean : Female	0			Intracranial blood volume (% Brain Volume) : Female	5	Additional Organ : Male (% of Qc)	0.65	Lymphatic Clearance CV (%)	10	Lymph volume (L/kg)	0.00386	Target2 Kshed CV (%)	30	Tumour : KpALB	0.138	Luminal fluid pH CV (%)	18	Additional Function	No
Abundance : CYP1A2 UM Freq	0	CPPGL : CV (%)	21.467	Female Age Cut-Off 2 CV 2 (%)	31.6	VEpidermis Fat (%) : Female	3	CPPI : Mean	2342	Lobe Distribution Percentage (%) Ventillation Rate RM	12.4	Gut : KpALB	0.158	Other CV (%)(%) : Female	0			Abundance : ABCB1 (P-gp/MDR1) Mean	1	Additional Organ : Female (% of Qc)	0.65	Vendothelial (fraction of tissuevolume)	0.005	Lymph volume CV (%)	30	Target2 Lambda (1/h)	0	Tumour : Other Protein (µM)	0	Regional blood flow scalar to vagina	1
Abundance : CYP1A2 IM Freq	0	HPGL : Mean	125	Prediction Method	Method 1	VEpidermis Fat CV (%) : Female	30	CPPI : CV (%)	31	Lobe Distribution Percentage (%) Ventillation Rate RT	14.8	Gut : KpLPP	0.141	User-defined Binding Type	User-defined			Abundance : ABCB1 (P-gp/MDR1) CV (%)	0	Additional Organ % of Body Weight	1	σv (Sigmav)	0.76	Total Plasma Protein (g/100ml)	6.85	Target3 Name	CD11a	Tumour : CV (%)	30	Regional blood flow scalar to vagina CV (%)	0	Enzyme	Intestinal CYP2C9
Abundance : CYP2A6 PM Freq	0	HPGL : CV (%)	20	Ref Value for Males 20~30	130			MPPC : Mean	622	Lobe Distribution Percentage (%) Ventillation Rate LL	32.1	Heart : IW (%)	44.5	Ontogeny Profile	No Profile Used			Abundance : ABCC4 (MRP4) Mean	1	Additional Organ % of Body Weight CV (%)	30	σl (Sigmal)	0.2	Total Plasma Protein CV (%)	1.5	Target3 Rmax (µM)	0	Tumour : EW pH	7.13	Regional blood flow scalar to cervix	1	Adult Max	1.059
Abundance : CYP2A6 UM Freq	0	P450/10e6 Cells : Baseline	3.034	Ref Value for Females 20~30	120	MechDermA - Upper Arm		MPPC : CV (%)	30	Lobe Distribution Percentage (%) Ventillation Rate LT	14.8	Heart : AP (mg/g)	3.07	Use Plasma ES Option	Yes			Abundance : ABCC4 (MRP4) CV (%)	0	Additional Organ Density (g/L)	923	Kup (1/h)	0.0298			Target3 Rmax CV (%)	30	Tumour : IW pH	7.26	Regional blood flow scalar to cervix CV (%)	0	Fbirth	0.42
Abundance : CYP2A6 IM Freq	0	P450/10e6 Cells : HPGL Coefficient	-0.506	Age Limit	140	SCorneum Thickness (µm) : Male	11.9	TMePPI : Mean	2737	Lobe Distribution Percentage (%) Ventillation Rate LA	100	Heart : KpALB	0.157	Abundance : Plasma ES EM Mean	1			Abundance : ABCG2 (BCRP) Mean	1	Additional Organ Capillary Bed (%)	5	Krc (1/h)	0.548			Target3 Kdeg (1/h)	0	Tumour : Vascular volume fraction	12			Age50 (X50)	2.357
Abundance : CYP2B6 PM Freq	0.11	Advanced Bile Model	No	Kidney Size	Script	SCorneum Thickness CV (%) : Male	29	TMePPI : CV (%)	0	Lobe Distribution Percentage (%) Ventillation Rate UA	100	Heart : KpLPP	0.16	Abundance : Plasma ES EM CV (%)	30			Abundance : ABCG2 (BCRP) CV (%)	0	For neutral (phospho)lipid Partitioning	Using Olive oil-water Partitioning	Krc,complex (1/h)	1.125			Target3 Kdeg CV (%)	30	Tumour : Endosomal volume fraction	5			n(Agen)	1
Abundance : CYP2B6 UM Freq	0	% Hepatic Bile Entering Gallbladder Mean	70.3	Kidney Volume Male CV (%)	0	SCorneum Thickness (µm) : Female	13.9	TMePPC : Mean	112	Lobe Distribution Percentage (%) Blood Flow Rate RL	31.1	Kidney : IW (%)	50	Abundance : Plasma ES PM Mean	0			Abundance : Apical Influx (BBB) Mean	1	Additional Organ : Endothelial Volume (%)	0.35625	FR	0.715			Target3 Kshed (1/hr)	0	Tumour : Interstitial volume fraction	25.63			Age-cap	18
Abundance : CYP2B6 IM Freq	0	% Hepatic Bile Entering Gallbladder CV (%)	32.1	Kidney Volume Female CV (%)	0	SCorneum Thickness CV (%) : Female	28	TMePPC : CV (%)	0	Lobe Distribution Percentage (%) Blood Flow Rate RM	11.8	Kidney : AP (mg/g)	2.48	Abundance : Plasma ES PM CV (%)	0			Abundance : Apical Influx (BBB) CV (%)	0	Additional Organ : Kup (1/h)	0.02979	Adipose σv	0.815			Target3 Kshed CV (%)	30	Tumour Growth Inhibition Model Type	Simeoni Cell Distribution			Additional Function	No
Abundance : CYP2C8 PM Freq	0	IMMC Cycle Time Mean (h)	1.55	Kidney Density	1050	SCorneum Fat (%) : Male	12.9	Use NEWE model for MBI and/or induction of gut CYPs	No	Lobe Distribution Percentage (%) Blood Flow Rate RT	8.6	Kidney : KpALB	0.13	Abundance : Plasma ES UM Mean	0			Abundance : Apical Influx (BCSFB) Mean	1	Additional Organ : Krc1 (1/h)	3.605	Bone σv	1			Target3 Lambda (1/h)	0	Tumour : Exponential Growth Rate (1/day)	1
Abundance : CYP2C8 UM Freq	0	IMMC Cycle Time CV (%)	55	Kidney function option	Values	SCorneum Fat CV (%) : Male	47	CYP2C9 EM Mean	12.5	Lobe Distribution Percentage (%) Blood Flow Rate LL	34.9	Kidney : KpLPP	0.137	Abundance : Plasma ES UM CV (%)	0			Abundance : Apical Influx (BCSFB) CV (%)	0	Additional Organ : Krc2 (1/h)	7.21	Brain σv	0.998			Target4 Name	Target 4	Tumour : CV (%)	0			Enzyme	UGT1A9
Abundance : CYP2C8 IM Freq	0	Fasted Gallbladder Emptied at % IMMC Cycle	30	GFR Function a0	-17.74	SCorneum Fat (%) : Female	12.9	CYP2C9 EM CV (%)	72	Lobe Distribution Percentage (%) Blood Flow Rate LT	8.6	Liver : IW (%)	58.6	Abundance : Plasma ES IM Mean	0			Abundance : Apical Efflux (BCSFB) Mean	1	Additional Organ : FR	0.715	Gut σv	0.8			Target4 Rmax (µM)	0	Tumour : Linear Growth Rate (g/day)	1			Adult Max	1.041
Abundance : CYP2C9 PM Freq	0.06	Fasted Gallbladder Release Constant Mean (1/h)	0.18	GFR Function a1	99.054	SCorneum Fat CV (%) : Female	47	CYP2C9 PM Mean	5	Lobe Distribution Percentage (%) Blood Flow Rate LA	5	Liver : AP (mg/g)	5.09	Abundance : Plasma ES IM CV (%)	0			Abundance : Apical Efflux (BCSFB) CV (%)	0			Heart σv	0.489			Target4 Rmax CV (%)	30	Tumour : CV (%)	0			Fbirth	0.086
Abundance : CYP2C9 UM Freq	0	Fasted Gallbladder Release Constant CV (%)	30	GFR Function a2	-6.1604	VEpidermis Thickness (µm) : Male	37.1	CYP2C9 PM Mean CV (%)	72	Lobe Distribution Percentage (%) Blood Flow Rate UA	2.5	Liver : KpALB	0.086									Kidney σv	0.726			Target4 Kdeg (1/h)	0	Tumour : Shape Factor	20			Age50 (X50)	1.16
Abundance : CYP2C9 IM Freq	0	Fed Gallbladder Release Constant Mean (1/h)	0.48	GFR Function CV	15	VEpidermis Thickness CV (%) : Male	51	CYP2C9 UM Mean	0	Lobe Distribution Percentage (%) Alveoli Volume RL	26.3	Liver : KpLPP	0.161									Liver σv	0.22			Target4 Kdeg CV (%)	30	Tumour : Transit Rate Cell Damage (1/day)	1			n(Agen)	1.2
Abundance : CYP2C18 PM Freq	0	Fed Gallbladder Release Constant CV (%)	19	PTCPGK Mean	60	VEpidermis Thickness (µm) : Female	45.7	CYP2C9 UM Mean CV (%)	0	Lobe Distribution Percentage (%) Alveoli Volume RM	10.5	Lung : IW (%)	46.3									Lung σv	0.397			Target4 Kshed (1/hr)	0	Tumour : CV (%)	0			Age-cap	15
Abundance : CYP2C18 UM Freq	0	Fasted Gallbladder Residual Volume Mean (%)	79.4	PTCPGK CV (%)	30	VEpidermis Thickness CV (%) : Female	62	CYP2C9 IM Mean	0	Lobe Distribution Percentage (%) Alveoli Volume RT	15.8	Lung : AP (mg/g)	0.5									Muscle σv	0.875			Target4 Kshed CV (%)	30	Tumour : Number Transit Compartments	3			Additional Function	No
Abundance : CYP2C18 IM Freq	0	Fasted Gallbladder Residual Volume CV (%)	13.1	MPPGK Mean	12.8	VEpidermis Fat (%) : Male	3	CYP2C9 IM Mean CV (%)	0	Lobe Distribution Percentage (%) Alveoli Volume LL	26.3	Lung : KpALB	0.212									Skin σv	0.822			Target4 Lambda (1/h)	0	ABCB1 (P-gp/MDR1) ET Mean	1
Abundance : CYP2C19 PM Freq	0.092	Fed Gallbladder Residual Volume Mean (%)	59.9	MPPGK CV (%)	55	VEpidermis Fat CV (%) : Male	30	CYP2C9 Mean Turnover Rate	0.03	Lobe Distribution Percentage (%) Alveoli Volume LT	21.1	Lung : KpLPP	0.168									Spleen σv	0.2			Target5 Name	Target 5	ABCB1 (P-gp/MDR1) CV (%)	0			Transporter	Intestinal ABCB1 (P-gp/MDR1)
Abundance : CYP2C19 UM Freq	0.318	Fed Gallbladder Residual Volume CV (%)	39.6	CPPGK Mean	0	VEpidermis Fat (%) : Female	3	CYP2C9 Mean Turnover Rate CV (%)	20	Lobe Distribution Percentage (%) Alveoli Volume LA	50	Muscle : IW (%)	66.9									Additional Organ σv	0.95			Target5 Rmax (µM)	0	ABCB1 (P-gp/MDR1) PT Mean	1			Adult Max	1
Abundance : CYP2C19 IM Freq	0	Enzyme interCorr Switch	Off	CPPGK CV (%)	30	VEpidermis Fat CV (%) : Female	30	Colon CYP2C9 EM Mean	0	Lobe Distribution Percentage (%) Alveoli Volume UA	50	Muscle : AP (mg/g)	2.49									Pancreas σv	0.5			Target5 Rmax CV (%)	30	ABCB1 (P-gp/MDR1) CV (%)	0			Fbirth	1
Abundance : CYP2D6 PM Freq	0.082	Enzyme Corr Switch	On	S9 Method	Predicted			Colon CYP2C9 EM CV (%)	0	Lobe Distribution Percentage (%) Absorption Area RL	26.3	Muscle : KpALB	0.034									Subcutaneous site σv	0.822			Target5 Kdeg (1/h)	0	ABCB1 (P-gp/MDR1) IT Mean	1			Age50 (X50)	10
Abundance : CYP2D6 UM Freq	0.053	Enz Corr C0	62.775	S9PPGK Mean	12.8	MechDermA - Lower Leg		Colon CYP2C9 PM Mean	N/A	Lobe Distribution Percentage (%) Absorption Area RM	10.5	Muscle : KpLPP	0.059									Adipose σl	0.2			Target5 Kdeg CV (%)	30	ABCB1 (P-gp/MDR1) CV (%)	0			n(Agen)	1
Abundance : CYP2D6 IM Freq	0	Enz Corr C1	0.3934	UGT1A1 EM Mean	1	SCorneum Thickness (µm) : Male	16.8	Colon CYP2C9 PM Mean CV (%)	N/A	Lobe Distribution Percentage (%) Absorption Area RT	15.8	Skin : IW (%)	9.47									Bone σl	0.2			Target5 Kshed (1/hr)	0	ABCB1 (P-gp/MDR1) UT Mean	1			Age-cap	0
Abundance : CYP2E1 PM Freq	0	Enz 2 Corr CV	24	UGT1A1 EM Mean CV (%)	50	SCorneum Thickness CV (%) : Male	52	Colon CYP2C9 UM Mean	N/A	Lobe Distribution Percentage (%) Absorption Area LL	26.3	Skin : AP (mg/g)	1.32									Brain σl	0.2			Target5 Kshed CV (%)	30	ABCB1 (P-gp/MDR1) CV (%)	0			Additional Function	No
Abundance : CYP2E1 UM Freq	0	Abundance : CYP1A2 EM Mean	52	UGT1A1 PM Mean	0.42	SCorneum Thickness (µm) : Female	13.9	Colon CYP2C9 UM Mean CV (%)	N/A	Lobe Distribution Percentage (%) Absorption Area LT	21.1	Skin : KpALB	0.277									Gut σl	0.2			Target5 Lambda (1/h)	0	ABCG2 (BCRP) ET Mean	1
Abundance : CYP2E1 IM Freq	0	Abundance : CYP1A2 EM CV (%)	67	UGT1A1 PM Mean CV (%)	50	SCorneum Thickness CV (%) : Female	43	Colon CYP2C9 IM Mean	N/A	Lobe Distribution Percentage (%) Absorption Area LA	50	Skin : KpLPP	0.096									Heart σl	0.2			Target6 Name	Target 6	ABCG2 (BCRP) CV (%)	0			Transporter	Intestinal ABCC2 (MRP2)
Abundance : CYP2J2 PM Freq	0	Abundance : CYP1A2 PM Mean	0	UGT1A1 UM Mean	1.46	SCorneum Fat (%) : Male	4.7	Colon CYP2C9 IM Mean CV (%)	N/A	Lobe Distribution Percentage (%) Absorption Area UA	50	Spleen : IW (%)	57.9									Kidney σl	0.2			Target6 Rmax (µM)	0	ABCG2 (BCRP) PT Mean	1			Adult Max	1
Abundance : CYP2J2 UM Freq	0	Abundance : CYP1A2 PM CV (%)	0	UGT1A1 UM Mean CV (%)	50	SCorneum Fat CV (%) : Male	62	Colon CYP2C9 Mean Turnover Rate	N/A	Lobe Distribution Percentage (%) Pulmonary Capilliary Blood Volume RL	16.66	Spleen : AP (mg/g)	2.81									Liver σl	0.2			Target6 Rmax CV (%)	30	ABCG2 (BCRP) CV (%)	0			Fbirth	1
Abundance : CYP2J2 IM Freq	0	Abundance : CYP1A2 UM Mean	0	UGT1A1 IM Mean	0.72	SCorneum Fat (%) : Female	4.7	Colon CYP2C9 Mean Turnover Rate CV (%)	N/A	Lobe Distribution Percentage (%) Pulmonary Capilliary Blood Volume RM	16.67	Spleen : KpALB	0.097									Lung σl	0.2			Target6 Kdeg (1/h)	0	ABCG2 (BCRP) IT Mean	1			Age50 (X50)	10
Abundance : CYP3A4 PM Freq	0	Abundance : CYP1A2 UM CV (%)	0	UGT1A1 IM Mean CV (%)	50	SCorneum Fat CV (%) : Female	62	CYP2C19 EM Mean	2	Lobe Distribution Percentage (%) Pulmonary Capilliary Blood Volume RT	16.67	Spleen : KpLPP	0.207									Muscle σl	0.2			Target6 Kdeg CV (%)	30	ABCG2 (BCRP) CV (%)	0			n(Agen)	1
Abundance : CYP3A4 UM Freq	0	Abundance : CYP1A2 IM Mean	0	UGT1A1 Absolute Abundance	6.1	VEpidermis Thickness (µm) : Male	63.4	CYP2C19 EM CV (%)	77	Lobe Distribution Percentage (%) Pulmonary Capilliary Blood Volume LL	16.67	Plasma : IW (%)	0									Skin σl	0.2			Target6 Kshed (1/hr)	0	ABCG2 (BCRP) UT Mean	1			Age-cap	0
Abundance : CYP3A4 IM Freq	0	Abundance : CYP1A2 IM CV (%)	0	UGT1A1 Mean Turnover Rate	0.0578	VEpidermis Thickness CV (%) : Male	32	CYP2C19 PM Mean	0	Lobe Distribution Percentage (%) Pulmonary Capilliary Blood Volume LT	16.67	Plasma : AP (mg/g)	0.04									Spleen σl	0.2			Target6 Kshed CV (%)	30	ABCG2 (BCRP) CV (%)	0			Additional Function	No
Abundance : CYP3A5 PM Freq	0.83	Turnover rate : CYP1A2 Mean	0.0183	UGT1A1 Mean Turnover Rate CV (%)	30	VEpidermis Thickness (µm) : Female	74.9	CYP2C19 PM Mean CV (%)	0	Lobe Distribution Percentage (%) Pulmonary Capilliary Blood Volume LA	8.33	RBC : IW (%)	66.6									Additional Organ σl	0.2			Target6 Lambda (1/h)	0	Efflux (Tumour) ET Mean	1
Abundance : CYP3A5 UM Freq	0	Turnover rate : CYP1A2 CV (%)	56	UGT1A3 EM Mean	1	VEpidermis Thickness CV (%) : Female	19	CYP2C19 UM Mean	4	Lobe Distribution Percentage (%) Pulmonary Capilliary Blood Volume UA	8.33	RBC : AP (mg/g)	0.44									Pancreas σl	0.2			Target7 Name	Target 7	Efflux (Tumour) CV (%)	0			Transporter	Intestinal ABCG2 (BCRP)
Abundance : CYP3A5 IM Freq	0	Abundance : CYP2A6 EM Mean	20	UGT1A3 EM Mean CV (%)	50	VEpidermis Fat (%) : Male	3	CYP2C19 UM Mean CV (%)	77	Lobe Distribution Percentage (%) Pulmonary Mass Volume RL	16.66	Pancreas : IW (%)	66.4									Subcutaneous site σl	0.2			Target7 Rmax (µM)	0	Efflux (Tumour) PT Mean	1			Adult Max	1
Abundance : CYP3A7 PM Freq	0.88	Abundance : CYP2A6 EM CV (%)	173	UGT1A3 PM Mean	0	VEpidermis Fat CV (%) : Male	30	CYP2C19 IM Mean	0	Lobe Distribution Percentage (%) Pulmonary Mass Volume RM	16.67	Pancreas : AP (mg/g)	1.67									Adipose FR	0			Target7 Rmax CV (%)	30	Efflux (Tumour) CV (%)	0			Fbirth	1
Abundance : CYP3A7 UM Freq	0	Abundance : CYP2A6 PM Mean	0	UGT1A3 PM Mean CV (%)	0	VEpidermis Fat (%) : Female	3	CYP2C19 IM Mean CV (%)	0	Lobe Distribution Percentage (%) Pulmonary Mass Volume RT	16.67	Pancreas : KpALB	0.06									Bone FR	1			Target7 Kdeg (1/h)	0	Efflux (Tumour) IT Mean	1			Age50 (X50)	10
Abundance : CYP3A7 IM Freq	0	Abundance : CYP2A6 PM CV (%)	0	UGT1A3 UM Mean	0	VEpidermis Fat CV (%) : Female	30	CYP2C19 Mean Turnover Rate	0.03	Lobe Distribution Percentage (%) Pulmonary Mass Volume LL	16.67	Pancreas : KpLPP	0.06									Brain FR	1			Target7 Kdeg CV (%)	30	Efflux (Tumour) CV (%)	0			n(Agen)	1
Abundance : CYP2C9 Allele 1 Genotype 1 Freq	0.672	Abundance : CYP2A6 UM Mean	0	UGT1A3 UM Mean CV (%)	0			CYP2C19 Mean Turnover Rate CV (%)	20	Lobe Distribution Percentage (%) Pulmonary Mass Volume LT	16.67	Placenta : IW (%)	0									Gut FR	1			Target7 Kshed (1/hr)	0	Efflux (Tumour) UT Mean	1			Age-cap	0
Abundance : CYP2C9 Allele 1 Genotype 2 Freq	0.186	Abundance : CYP2A6 UM CV (%)	0	UGT1A3 IM Mean	0	MechDermA - Thigh		Colon CYP2C19 EM Mean	0	Lobe Distribution Percentage (%) Pulmonary Mass Volume LA	8.33	Placenta : AP (mg/g)	0									Heart FR	1			Target7 Kshed CV (%)	30	Efflux (Tumour) CV (%)	0			Additional Function	No
Abundance : CYP2C9 Allele 1 Genotype 3 Freq	0.111	Abundance : CYP2A6 IM Mean	0	UGT1A3 IM Mean CV (%)	0	SCorneum Thickness (µm) : Male	11	Colon CYP2C19 EM CV (%)	0	Lobe Distribution Percentage (%) Pulmonary Mass Volume UA	8.33	Placenta : KpALB	0									Kidney FR	1			Target7 Lambda (1/h)	0	Uptake (Tumour) ET Mean	1
Abundance : CYP2C9 Allele 1 Genotype 4 Freq	0.011	Abundance : CYP2A6 IM CV (%)	0	UGT1A3 Absolute Abundance	0	SCorneum Thickness CV (%) : Male	32	Colon CYP2C19 PM Mean	N/A	Lobe Distribution Percentage (%) Epithelial Lining Fluid Volume RL	16.66	Placenta : KpLPP	0									Liver FR	1			Target8 Name	Target 8	Uptake (Tumour) CV (%)	0			Transporter	Intestinal Apical Influx (Intestine)
Abundance : CYP2C9 Allele 1 Genotype 5 Freq	0.017	Turnover rate : CYP2A6 Mean	0.0267	UGT1A3 Mean Turnover Rate	1e-06	SCorneum Thickness (µm) : Female	11	Colon CYP2C19 PM Mean CV (%)	N/A	Lobe Distribution Percentage (%) Epithelial Lining Fluid Volume RM	16.67	Adipose Volume Scalar	1									Lung FR	1			Target8 Rmax (µM)	0	Uptake (Tumour) PT Mean	1			Adult Max	1
Abundance : CYP2C9 Allele 1 Genotype 6 Freq	0.003	Turnover rate : CYP2A6 CV (%)	56	UGT1A3 Mean Turnover Rate CV (%)	30	SCorneum Thickness CV (%) : Female	20	Colon CYP2C19 UM Mean	N/A	Lobe Distribution Percentage (%) Epithelial Lining Fluid Volume RT	16.67	Bone Volume Scalar	1									Muscle FR	0			Target8 Rmax CV (%)	30	Uptake (Tumour) CV (%)	0			Fbirth	1
Abundance : UGT1A1 PM Freq	0.11	Abundance : CYP2B6 EM Mean	17	UGT1A4 EM Mean	1	SCorneum Fat (%) : Male	23.7	Colon CYP2C19 UM Mean CV (%)	N/A	Lobe Distribution Percentage (%) Epithelial Lining Fluid Volume LL	16.67	Brain Volume Scalar	1									Skin FR	0			Target8 Kdeg (1/h)	0	Uptake (Tumour) IT Mean	1			Age50 (X50)	10
Abundance : UGT1A1 UM Freq	0.01	Abundance : CYP2B6 EM CV (%)	122	UGT1A4 EM Mean CV (%)	50	SCorneum Fat CV (%) : Male	24	Colon CYP2C19 IM Mean	N/A	Lobe Distribution Percentage (%) Epithelial Lining Fluid Volume LT	16.67	Gut Volume Scalar	1									Spleen FR	1			Target8 Kdeg CV (%)	30	Uptake (Tumour) CV (%)	0			n(Agen)	1
Abundance : UGT1A1 IM Freq	0.44	Abundance : CYP2B6 PM Mean	6	UGT1A4 PM Mean	0	SCorneum Fat (%) : Female	23.7	Colon CYP2C19 IM Mean CV (%)	N/A	Lobe Distribution Percentage (%) Epithelial Lining Fluid Volume LA	8.33	Heart Volume Scalar	1									Additional Organ FR	1			Target8 Kshed (1/hr)	0	Uptake (Tumour) UT Mean	1			Age-cap	0
Abundance : UGT1A3 PM Freq	0	Abundance : CYP2B6 PM CV (%)	200	UGT1A4 PM Mean CV (%)	0	SCorneum Fat CV (%) : Female	24	Colon CYP2C19 Mean Turnover Rate	N/A	Lobe Distribution Percentage (%) Epithelial Lining Fluid Volume UA	8.33	Kidney Volume Scalar	1									Pancreas FR	1			Target8 Kshed CV (%)	30	Uptake (Tumour) CV (%)	0			Additional Function	No
Abundance : UGT1A3 UM Freq	0	Abundance : CYP2B6 UM Mean	0	UGT1A4 UM Mean	0	VEpidermis Thickness (µm) : Male	53.3	Colon CYP2C19 Mean Turnover Rate CV (%)	N/A	Use local pH by segment	No	Liver Volume Scalar	1									Subcutaneous site FR	0			Target8 Lambda (1/h)	0	Tumour : Target Abundance (µM)	0
Abundance : UGT1A3 IM Freq	0	Abundance : CYP2B6 UM CV (%)	0	UGT1A4 UM Mean CV (%)	0	VEpidermis Thickness CV (%) : Male	40	CYP2D6 EM Mean	1.1	Basal Influx 1 (Lung) Mean	1	Lung Volume Scalar	1									Adipose FcRn	0.93069			Target9 Name	Target 9	Tumour : CV (%)	0			Transporter	Hepatic ABCB1 (P-gp/MDR1)
Abundance : UGT1A4 PM Freq	0	Abundance : CYP2B6 IM Mean	0	UGT1A4 IM Mean	0	VEpidermis Thickness (µm) : Female	43.3	CYP2D6 EM CV (%)	47	Basal Influx 1 (Lung) CV (%)	0	Muscle Volume Scalar	1									Bone FcRn	2.24581			Target9 Rmax (µM)	0	Tumour : Target MW (Da)	150000			Adult Max	1
Abundance : UGT1A4 UM Freq	0	Abundance : CYP2B6 IM CV (%)	0	UGT1A4 IM Mean CV (%)	0	VEpidermis Thickness CV (%) : Female	40	CYP2D6 PM Mean	0	Basal Influx 2 (Lung) Mean	1	Skin Volume Scalar	1									Brain FcRn	0.246748			Target9 Rmax CV (%)	30	Tumour : Tissue Radius (µm)	75			Fbirth	1
Abundance : UGT1A4 IM Freq	0	Turnover rate : CYP2B6 Mean	0.0217	UGT1A4 Absolute Abundance	8.7	VEpidermis Fat (%) : Male	3	CYP2D6 PM Mean CV (%)	0	Basal Influx 2 (Lung) CV (%)	0	Spleen Volume Scalar	1									Gut FcRn	1.69464			Target9 Kdeg (1/h)	0	Tumour : CV (%)	30			Age50 (X50)	10
Abundance : UGT1A5 PM Freq	0	Turnover rate : CYP2B6 CV (%)	56	UGT1A4 Mean Turnover Rate	1e-06	VEpidermis Fat CV (%) : Male	30	CYP2D6 UM Mean	2.1	Basal Efflux 1 (Lung) Mean	1	Plasma Volume Scalar	1									Heart FcRn	0.864965			Target9 Kdeg CV (%)	30	Tumour : Capillary Radius (µm)	8			n(Agen)	1
Abundance : UGT1A5 UM Freq	0	Abundance : CYP2C8 EM Mean	24	UGT1A4 Mean Turnover Rate CV (%)	30	VEpidermis Fat (%) : Female	3	CYP2D6 UM Mean CV (%)	47	Basal Efflux 1 (Lung) CV (%)	0	Placenta Volume Scalar	0									Kidney FcRn	0.766998			Target9 Kshed (1/hr)	0	Tumour : CV (%)	10			Age-cap	0
Abundance : UGT1A5 IM Freq	0	Abundance : CYP2C8 EM CV (%)	81	UGT1A5 EM Mean	1	VEpidermis Fat CV (%) : Female	30	CYP2D6 IM Mean	0	Basal Efflux 2 (Lung) Mean	1	Membrane potential : Adipose (mV)	-41									Liver FcRn	2.40702			Target9 Kshed CV (%)	30	Tumour : Correction Factor	0.63			Additional Function	No
Abundance : UGT1A6 PM Freq	0	Abundance : CYP2C8 PM Mean	0	UGT1A5 EM Mean CV (%)	50			CYP2D6 IM Mean CV (%)	0	Basal Efflux 2 (Lung) CV (%)	0	Membrane potential : Bone (mV)	-41									Lung FcRn	3.04753			Target9 Lambda (1/h)	0	Tumour : CV (%)	0
Abundance : UGT1A6 UM Freq	0	Abundance : CYP2C8 PM CV (%)	0	UGT1A5 PM Mean	0	MechDermA - Face		CYP2D6 Mean Turnover Rate	0.03	Apical Influx 1 (Lung) Mean	1	Membrane potential : Brain (mV)	-41									Muscle FcRn	0.485806			Target10 Name	Target 10	Tumour : Capillary Small Pore Radius (nm)	4.5			Transporter	Hepatic ABCC2 (MRP2)
Abundance : UGT1A6 IM Freq	0	Abundance : CYP2C8 UM Mean	0	UGT1A5 PM Mean CV (%)	0	SCorneum Thickness (µm) : Male	14.3	CYP2D6 Mean Turnover Rate CV (%)	20	Apical Influx 1 (Lung) CV (%)	0	Membrane potential : Gut (mV)	-41									Skin FcRn	2.96258			Target10 Rmax (µM)	0	Tumour : Capillary Large Pore Radius (nm)	500			Adult Max	1
Abundance : UGT1A7 PM Freq	0	Abundance : CYP2C8 UM CV (%)	0	UGT1A5 UM Mean	0	SCorneum Thickness CV (%) : Male	23	Colon CYP2D6 EM Mean	0	Apical Influx 2 (Lung) Mean	1	Membrane potential : Heart (mV)	-41									Spleen FcRn	2.24581			Target10 Rmax CV (%)	30	Tumour : Capillary Small Pore Membrane Thickness (1/cm)	17.6			Fbirth	1
Abundance : UGT1A7 UM Freq	0	Abundance : CYP2C8 IM Mean	0	UGT1A5 UM Mean CV (%)	0	SCorneum Thickness (µm) : Female	15.6	Colon CYP2D6 EM CV (%)	0	Apical Influx 2 (Lung) CV (%)	0	Membrane potential : Kidney (mV)	-70									Additional Organ FcRn	1			Target10 Kdeg (1/h)	0	Tumour : Capillary Large Pore Membrane Thickness (1/cm)	0.65			Age50 (X50)	10
Abundance : UGT1A7 IM Freq	0	Abundance : CYP2C8 IM CV (%)	0	UGT1A5 IM Mean	0	SCorneum Thickness CV (%) : Female	21	Colon CYP2D6 PM Mean	N/A	Apical Efflux 1 (Lung) Mean	1	Membrane potential : Liver (mV)	-41									Pancreas FcRn	1.69464			Target10 Kdeg CV (%)	30	Tumour : Capillary Small Pore Hydrolic Conductance	0.01			n(Agen)	1
Abundance : UGT1A8 PM Freq	0	Turnover rate : CYP2C8 Mean	0.0301	UGT1A5 IM Mean CV (%)	0	SCorneum Fat (%) : Male	7.2	Colon CYP2D6 PM Mean CV (%)	N/A	Apical Efflux 1 (Lung) CV (%)	0	Membrane potential : Lung (mV)	-41									Subcutaneous site FcRn	2.96258			Target10 Kshed (1/hr)	0	Tumour : Interstitial Small Pore Radius (nm)	13.8			Age-cap	0
Abundance : UGT1A8 UM Freq	0	Turnover rate : CYP2C8 CV (%)	56	UGT1A5 Absolute Abundance	0	SCorneum Fat CV (%) : Male	12	Colon CYP2D6 UM Mean	N/A	Apical Efflux 2 (Lung) Mean	1	Membrane potential : Muscle (mV)	-41									Adipose PS	0			Target10 Kshed CV (%)	30	Tumour : Interstitial Large Pore Radius (nm)	1000			Additional Function	No
Abundance : UGT1A8 IM Freq	0	Abundance : CYP2C9 EM Mean	73	UGT1A5 Mean Turnover Rate	1e-06	SCorneum Fat (%) : Female	7.2	Colon CYP2D6 UM Mean CV (%)	N/A	Apical Efflux 2 (Lung) CV (%)	0	Membrane potential : Skin (mV)	-41									Bone PS	0.1			Target10 Lambda (1/h)	0	Tumour : Interstitial Small Pore Fraction	0.9
Abundance : UGT1A9 PM Freq	0.04	Abundance : CYP2C9 EM CV (%)	54	UGT1A5 Mean Turnover Rate CV (%)	30	SCorneum Fat CV (%) : Female	12	Colon CYP2D6 IM Mean	N/A			Membrane potential : Spleen (mV)	-41									Brain PS	0			Target11 Name	Target 11	Tumour : FcRn Abundance Scalar	1			Transporter	Hepatic ABCG2 (BCRP)
Abundance : UGT1A9 UM Freq	0	Abundance : CYP2C9 PM Mean	29	UGT1A6 EM Mean	1	VEpidermis Thickness (µm) : Male	38.9	Colon CYP2D6 IM Mean CV (%)	N/A	Initial bacteria number	20	Membrane potential : RBC (mV)	-10									Gut PS	0			Target11 Rmax (µM)	0					Adult Max	1
Abundance : UGT1A9 IM Freq	0	Abundance : CYP2C9 PM CV (%)	73	UGT1A6 EM Mean CV (%)	50	VEpidermis Thickness CV (%) : Male	50	Colon CYP2D6 Mean Turnover Rate	N/A			Membrane potential : Pancreas (mV)	-41									Heart PS	0			Target11 Rmax CV (%)	30					Fbirth	1
Abundance : UGT1A10 PM Freq	0	Abundance : CYP2C9 UM Mean	0	UGT1A6 PM Mean	0	VEpidermis Thickness (µm) : Female	37.4	Colon CYP2D6 Mean Turnover Rate CV (%)	N/A	Granuloma growth period (days)	200	Membrane potential : Placenta (mV)	0									Kidney PS	0			Target11 Kdeg (1/h)	0					Age50 (X50)	10
Abundance : UGT1A10 UM Freq	0	Abundance : CYP2C9 UM CV (%)	0	UGT1A6 PM Mean CV (%)	0	VEpidermis Thickness CV (%) : Female	21	CYP2J2 EM Mean	7.4			Ve (Fraction Tissue volume) : Lung	0.0050985									Liver PS	0			Target11 Kdeg CV (%)	30					n(Agen)	1
Abundance : UGT1A10 IM Freq	0	Abundance : CYP2C9 IM Mean	0	UGT1A6 UM Mean	0	VEpidermis Fat (%) : Male	3	CYP2J2 EM CV (%)	69	Granuloma location Frequency: RLM	1	Ve (Fraction Tissue volume) : Heart	0.001155									Lung PS	0			Target11 Kshed (1/hr)	0					Age-cap	0
Abundance : UGT2B4 PM Freq	0	Abundance : CYP2C9 IM CV (%)	0	UGT1A6 UM Mean CV (%)	0	VEpidermis Fat CV (%) : Male	30	CYP2J2 PM Mean	0	Granuloma location Frequency: RMM	0	Ve (Fraction Tissue volume) : Brain	0.0025									Muscle PS	0			Target11 Kshed CV (%)	30					Additional Function	No
Abundance : UGT2B4 UM Freq	0	Turnover rate : CYP2C9 Mean	0.0067	UGT1A6 IM Mean	0	VEpidermis Fat (%) : Female	3	CYP2J2 PM Mean CV (%)	0	Granuloma location Frequency: RMM	0	Ve (Fraction Tissue volume) : Muscle	0.001375									Skin PS	0			Target11 Lambda (1/h)	0
Abundance : UGT2B4 IM Freq	0	Turnover rate : CYP2C9 CV (%)	56	UGT1A6 IM Mean CV (%)	0	VEpidermis Fat CV (%) : Female	30	CYP2J2 UM Mean	0	Granuloma location Frequency: LLM	0	Ve (Fraction Tissue volume) : Skin	0.00275									Spleen PS	0			Target12 Name	Target 12					Transporter	Hepatic SLCO1B1 (OATP1B1)
Abundance : UGT2B7 PM Freq	0	Abundance : CYP2C18 EM Mean	1	UGT1A6 Absolute Abundance	3.6			CYP2J2 UM Mean CV (%)	0	Granuloma location Frequency: LTM	0	Ve (Fraction Tissue volume) : Adipose	0.001925									Additional Organ PS	0			Target12 Rmax (µM)	0					Adult Max	1
Abundance : UGT2B7 UM Freq	0	Abundance : CYP2C18 EM CV (%)	106	UGT1A6 Mean Turnover Rate	1e-06	MPMLA - Forehead		CYP2J2 IM Mean	0			Ve (Fraction Tissue volume) : Bone	0.001375									Pancreas PS	0			Target12 Rmax CV (%)	30					Fbirth	1
Abundance : UGT2B7 IM Freq	0	Abundance : CYP2C18 PM Mean	0	UGT1A6 Mean Turnover Rate CV (%)	30	Skin surface pH : Male	4.5	CYP2J2 IM Mean CV (%)	0	Macrophage diameter (μm): Mean	21.2	Ve (Fraction Tissue volume) : Kidney	0.001925									Additional Organ PS	0.01			Target12 Kdeg (1/h)	0					Age50 (X50)	10
Abundance : UGT2B10 PM Freq	0	Abundance : CYP2C18 PM CV (%)	0	UGT1A7 EM Mean	1	Skin surface pH CV (%) : Male	7.4	CYP2J2 Mean Turnover Rate	0.03	Macrophage fraction (%): Mean	50	Ve (Fraction Tissue volume) : ByPass	0									Subcutaneous site PS	0			Target12 Kdeg CV (%)	30					n(Agen)	1
Abundance : UGT2B10 UM Freq	0	Abundance : CYP2C18 UM Mean	0	UGT1A7 EM Mean CV (%)	50	Skin temperature °C : Male	32	CYP2J2 Mean Turnover Rate CV (%)	20	ISF fraction (%): Mean	10	Ve (Fraction Tissue volume) : Gut	0.001375									Adipose fCLcat	0.05			Target12 Kshed (1/hr)	0					Age-cap	0
Abundance : UGT2B10 IM Freq	0	Abundance : CYP2C18 UM CV (%)	0	UGT1A7 PM Mean	0	Skin temperature CV (%) : Male	0	Colon CYP2J2 EM Mean	0	ISF fraction: CV (%)	30	Ve (Fraction Tissue volume) : Spleen	0.001375									Bone fCLcat	0.05			Target12 Kshed CV (%)	30					Additional Function	No
Abundance : UGT2B11 PM Freq	0	Abundance : CYP2C18 IM Mean	0	UGT1A7 PM Mean CV (%)	0	Shape of corneocyte : Male	Cuboid (brick)	Colon CYP2J2 EM CV (%)	0	Outer-caseum fraction (%): Mean	20	Ve (Fraction Tissue volume) : Pancreas	0.001375									Brain fCLcat	0.0009			Target12 Lambda (1/h)	0
Abundance : UGT2B11 UM Freq	0	Abundance : CYP2C18 IM CV (%)	0	UGT1A7 UM Mean	0	Shape of corneocyte : Female	Cuboid (brick)	Colon CYP2J2 PM Mean	N/A	Outer-caseum fraction: CV (%)	30	Ve (Fraction Tissue volume) : Liver	0.001375									Gut fCLcat	0.025			Target13 Name	Target 13					Transporter	Hepatic SLCO1B3 (OATP1B3)
Abundance : UGT2B11 IM Freq	0	Turnover rate : CYP2C18 Mean	0.0267	UGT1A7 UM Mean CV (%)	0	Number of SC layers : Male	12	Colon CYP2J2 PM Mean CV (%)	N/A	Inner-caseum fraction (%): Mean	20	Subcell Membrane potential : Adipose (mV)	10									Heart fCLcat	0.0054			Target13 Rmax (µM)	0					Adult Max	1
Abundance : UGT2B15 PM Freq	0.28	Turnover rate : CYP2C18 CV (%)	56	UGT1A7 IM Mean	0	Number of SC layers CV (%) : Male	8	Colon CYP2J2 UM Mean	N/A	Inner-caseum fraction: CV (%)	30	Subcell Membrane potential : Bone (mV)	10									Kidney fCLcat	0.041			Target13 Rmax CV (%)	30					Fbirth	1
Abundance : UGT2B15 UM Freq	0	Abundance : CYP2C19 EM Mean	4.4	UGT1A7 IM Mean CV (%)	0	Water density gm/cm3 : Male	1	Colon CYP2J2 UM Mean CV (%)	N/A			Subcell Membrane potential : Brain (mV)	10									Liver fCLcat	0.41			Target13 Kdeg (1/h)	0					Age50 (X50)	10
Abundance : UGT2B15 IM Freq	0.51	Abundance : CYP2C19 EM CV (%)	71	UGT1A7 Absolute Abundance	13	Water density CV (%) : Male	0	Colon CYP2J2 IM Mean	N/A	Local pH: macrophage	5	Subcell Membrane potential : Gut (mV)	10									Lung fCLcat	0.0057			Target13 Kdeg CV (%)	30					n(Agen)	1
Abundance : UGT2B17 PM Freq	0.09	Abundance : CYP2C19 PM Mean	0	UGT1A7 Mean Turnover Rate	1e-06	SC lipids density gm/cm3 : Male	0.9	Colon CYP2J2 IM Mean CV (%)	N/A	Local pH: ISF	6.7	Subcell Membrane potential : Heart (mV)	10									Muscle fCLcat	0.1			Target13 Kshed (1/hr)	0					Age-cap	0
Abundance : UGT2B17 UM Freq	0	Abundance : CYP2C19 PM CV (%)	0	UGT1A7 Mean Turnover Rate CV (%)	30	SC lipids density CV (%) : Male	0	Colon CYP2J2 Mean Turnover Rate	N/A	Local pH: caseum	7.4	Subcell Membrane potential : Kidney (mV)	10									Skin fCLcat	0.27			Target13 Kshed CV (%)	30					Additional Function	No
Abundance : UGT2B17 IM Freq	0.36	Abundance : CYP2C19 UM Mean	8.7	UGT1A8 EM Mean	1	SC proteins density gm/cm3 : Male	1.37	Colon CYP2J2 Mean Turnover Rate CV (%)	N/A			Subcell Membrane potential : Liver (mV)	10									Spleen fCLcat	0.018			Target13 Lambda (1/h)	0
Abundance : UGT2B28 PM Freq	0	Abundance : CYP2C19 UM CV (%)	71	UGT1A8 EM Mean CV (%)	50	SC proteins density CV (%) : Male	0	CYP3A4 EM Mean	65.4	Uptake (macrophage): Mean	1	Subcell Membrane potential : Lung (mV)	10									Additional Organ fCLcat	0.01			Target14 Name	Target 14					Transporter	Hepatic SLCO2B1 (OATP2B1)
Abundance : UGT2B28 UM Freq	0	Abundance : CYP2C19 IM Mean	0	UGT1A8 PM Mean	0	Intercellular lipid thickness of SC µm : Male	0.091	CYP3A4 EM CV (%)	52	Uptake (macrophage): CV (%)	1	Subcell Membrane potential : Muscle (mV)	10									Pancreas fCLcat	0.005			Target14 Rmax (µM)	0					Adult Max	1
Abundance : UGT2B28 IM Freq	0	Abundance : CYP2C19 IM CV (%)	0	UGT1A8 PM Mean CV (%)	0	Intercellular lipid thickness of SC CV (%) : Male	0	CYP3A4 PM Mean	0	Efflux (macrophage): Mean	1	Subcell Membrane potential : Skin (mV)	10									Subcutaneous site fCLcat	0.000239			Target14 Rmax CV (%)	30					Fbirth	1
Abundance : User UGT1 PM Freq	0	Turnover rate : CYP2C19 Mean	0.0267	UGT1A8 UM Mean	0	Tortuosity : Male	User Defined	CYP3A4 PM Mean CV (%)	0	Efflux (macrophage): CV (%)	0	Subcell Membrane potential : Spleen (mV)	10									Kup Full PBPK (1/h)	0.0298			Target14 Kdeg (1/h)	0					Age50 (X50)	10
Abundance : User UGT1 UM Freq	0	Turnover rate : CYP2C19 CV (%)	56	UGT1A8 UM Mean CV (%)	0	Tortuosity of lipid diffusion pathway of SC : Male	12.7	CYP3A4 UM Mean	0	BN pre-treatment number: Mean	80	Subcell Membrane potential : RBC (mV)	10									Krc Full PBPK (1/h)	3.605			Target14 Kdeg CV (%)	30					n(Agen)	1
Abundance : User UGT1 IM Freq	0	Abundance : CYP2D6 EM Mean	9.4	UGT1A8 IM Mean	0	Tortuosity of lipid diffusion pathway of SC CV (%) : Male	18	CYP3A4 UM Mean CV (%)	0	BN pre-treatment number: CV (%)	30	Subcell Membrane potential : Pancreas (mV)	10									Krc,complex Full PBPK (1/h)	7.21			Target14 Kshed (1/hr)	0					Age-cap	0
Abundance : User Cyt1 PM Freq	0	Abundance : CYP2D6 EM CV (%)	65	UGT1A8 IM Mean CV (%)	0	Hair follicle diameter µm : Male	65.4	CYP3A4 IM Mean	0			Subcell Membrane potential : Placenta (mV)	0									Additional Clearance Full PBPK (L/h)	0.0020407			Target14 Kshed CV (%)	30					Additional Function	No
Abundance : User Cyt1 UM Freq	0	Abundance : CYP2D6 PM Mean	0	UGT1A8 Absolute Abundance	4.9	Hair follicle diameter CV (%) : Male	83	CYP3A4 IM Mean CV (%)	0			Local pH (IW) : Adipose	7									Additional Clearance Full PBPK CV (%)	10			Target14 Lambda (1/h)	0
Abundance : User Cyt1 IM Freq	0	Abundance : CYP2D6 PM CV (%)	0	UGT1A8 Mean Turnover Rate	1e-06	Hair follicle density N/cm2 : Male	292	CYP3A4 Mean Turnover Rate	0.03			Local pH (IW) : Bone	7													Target15 Name	Target 15					Transporter	Sinusoidal Uptake (Liver)
Abundance : User Cyt2 PM Freq	0	Abundance : CYP2D6 UM Mean	18.8	UGT1A8 Mean Turnover Rate CV (%)	30	Hair follicle density CV (%) : Male	16	CYP3A4 Mean Turnover Rate CV (%)	20			Local pH (IW) : Brain	7.12													Target15 Rmax (µM)	0					Adult Max	1
Abundance : User Cyt2 UM Freq	0	Abundance : CYP2D6 UM CV (%)	65	UGT1A9 EM Mean	1	Hair follicle depth µm : Male	204.8	Colon CYP3A4 EM Mean	1.99			Local pH (IW) : Gut	7													Target15 Rmax CV (%)	30					Fbirth	1
Abundance : User Cyt2 IM Freq	0	Abundance : CYP2D6 IM Mean	0	UGT1A9 EM Mean CV (%)	50	Hair follicle depth CV (%) : Male	0	Colon CYP3A4 EM CV (%)	30			Local pH (IW) : Heart	7													Target15 Kdeg (1/h)	0					Age50 (X50)	10
Abundance : User Cyt3 PM Freq	0	Abundance : CYP2D6 IM CV (%)	0	UGT1A9 PM Mean	0.07	Hair shaft diameter µm : Male	15.9	Colon CYP3A4 PM Mean	N/A			Local pH (IW) : Kidney	7.2													Target15 Kdeg CV (%)	30					n(Agen)	1
Abundance : User Cyt3 UM Freq	0	Turnover rate : CYP2D6 Mean	0.0099	UGT1A9 PM Mean CV (%)	50	Hair shaft diameter CV (%) : Male	57	Colon CYP3A4 PM Mean CV (%)	N/A			Local pH (IW) : Liver	7													Target15 Kshed (1/hr)	0					Age-cap	0
Abundance : User Cyt3 IM Freq	0	Turnover rate : CYP2D6 CV (%)	56	UGT1A9 UM Mean	0	Sebum viscosity centipose : Male	40	Colon CYP3A4 UM Mean	N/A			Local pH (IW) : Lung	6.7													Target15 Kshed CV (%)	30					Additional Function	No
Abundance : User Cyt4 PM Freq	0	Abundance : CYP2E1 EM Mean	61	UGT1A9 UM Mean CV (%)	0	Sebum viscosity CV (%) : Male	0	Colon CYP3A4 UM Mean CV (%)	N/A			Local pH (IW) : Muscle	7													Target15 Lambda (1/h)	0
Abundance : User Cyt4 UM Freq	0	Abundance : CYP2E1 EM CV (%)	61	UGT1A9 IM Mean	0.19	Corneocyte pH [top] : Male	6.8	Colon CYP3A4 IM Mean	N/A			Local pH (IW) : Skin	7													Target16 Name	Target 16					Transporter	Sinusoidal Efflux (Liver)
Abundance : User Cyt4 IM Freq	0	Abundance : CYP2E1 PM Mean	0	UGT1A9 IM Mean CV (%)	50	Corneocyte pH [top] CV (%) : Male	6.8	Colon CYP3A4 IM Mean CV (%)	N/A			Local pH (IW) : Spleen	7													Target16 Rmax (µM)	0					Adult Max	1
Abundance : CES1 PM Freq	0.001	Abundance : CYP2E1 PM CV (%)	0	UGT1A9 Absolute Abundance	79	Corneocyte thickness [top] µm : Male	0.71	Colon CYP3A4 Mean Turnover Rate	N/A			Local pH (IW) : RBC	7.22													Target16 Rmax CV (%)	30					Fbirth	1
Abundance : CES1 UM Freq	0	Abundance : CYP2E1 UM Mean	0	UGT1A9 Mean Turnover Rate	1e-06	Corneocyte thickness [top] CV (%) : Male	36	Colon CYP3A4 Mean Turnover Rate CV (%)	N/A			Local pH (IW) : Pancreas	7													Target16 Kdeg (1/h)	0					Age50 (X50)	10
Abundance : CES1 IM Freq	0	Abundance : CYP2E1 UM CV (%)	0	UGT1A9 Mean Turnover Rate CV (%)	30	Corneocyte width [top] µm : Male	27.7	CYP3A5 EM Mean	23.3			Local pH (IW) : Placenta	0													Target16 Kdeg CV (%)	30					n(Agen)	1
Abundance : CES2 PM Freq	0	Abundance : CYP2E1 IM Mean	0	UGT1A10 EM Mean	1	Corneocyte width [top] CV (%) : Male	9.2	CYP3A5 EM CV (%)	32			Subcell pH : Adipose	5													Target16 Kshed (1/hr)	0					Age-cap	0
Abundance : CES2 UM Freq	0	Abundance : CYP2E1 IM CV (%)	0	UGT1A10 EM Mean CV (%)	50	Corneocyte length [top] µm : Male	34.2	CYP3A5 PM Mean	0			Subcell pH : Bone	5													Target16 Kshed CV (%)	30					Additional Function	No
Abundance : CES2 IM Freq	0	Turnover rate : CYP2E1 Mean	0.0176	UGT1A10 PM Mean	0	Corneocyte length [top] CV (%) : Male	4.1	CYP3A5 PM Mean CV (%)	0			Subcell pH : Brain	5													Target16 Lambda (1/h)	0
Abundance : User ES PM Freq	0	Turnover rate : CYP2E1 CV (%)	63	UGT1A10 PM Mean CV (%)	0	Hydration level (% water volume) [top] : Male	35.5	CYP3A5 UM Mean	0			Subcell pH : Gut	5													Target17 Name	Target 17					Transporter	Canalicular Efflux (Liver)
Abundance : User ES UM Freq	0	Abundance : CYP2J2 EM Mean	1.2	UGT1A10 UM Mean	0	Hydration level (% water volume) [top] CV (%) : Male	17	CYP3A5 UM Mean CV (%)	0			Subcell pH : Heart	5													Target17 Rmax (µM)	0					Adult Max	1
Abundance : User ES IM Freq	0	Abundance : CYP2J2 EM CV (%)	175	UGT1A10 UM Mean CV (%)	0	SC lipid viscosity [top] centipose : Male	75	CYP3A5 IM Mean	0			Subcell pH : Kidney	5													Target17 Rmax CV (%)	30					Fbirth	1
Abundance : PM Freq	0	Abundance : CYP2J2 PM Mean	0	UGT1A10 IM Mean	0	SC lipid viscosity [top] CV (%) : Male	0	CYP3A5 IM Mean CV (%)	0			Subcell pH : Liver	5													Target17 Kdeg (1/h)	0					Age50 (X50)	10
Abundance : UM Freq	0	Abundance : CYP2J2 PM CV (%)	0	UGT1A10 IM Mean CV (%)	0	Corneocyte pH [upper mid] : Male	6.8	CYP3A5 Mean Turnover Rate	0.03			Subcell pH : Lung	5													Target17 Kdeg CV (%)	30					n(Agen)	1
Abundance : IM Freq	0	Abundance : CYP2J2 UM Mean	0	UGT1A10 Absolute Abundance	17	Corneocyte pH [upper mid] CV (%) : Male	6.8	CYP3A5 Mean Turnover Rate CV (%)	20			Subcell pH : Muscle	5													Target17 Kshed (1/hr)	0					Age-cap	0
Abundance : PM Freq	0	Abundance : CYP2J2 UM CV (%)	0	UGT1A10 Mean Turnover Rate	1e-06	Corneocyte thickness [upper mid] µm : Male	0.81	Colon CYP3A5 EM Mean	0.74			Subcell pH : Skin	5													Target17 Kshed CV (%)	30					Additional Function	No
Abundance : UM Freq	0	Abundance : CYP2J2 IM Mean	0	UGT1A10 Mean Turnover Rate CV (%)	30	Corneocyte thickness [upper mid] CV (%) : Male	36	Colon CYP3A5 EM CV (%)	30			Subcell pH : Spleen	5													Target17 Lambda (1/h)	0
Abundance : IM Freq	0	Abundance : CYP2J2 IM CV (%)	0	UGT2B4 EM Mean	1	Corneocyte width [upper mid] µm : Male	27.7	Colon CYP3A5 PM Mean	N/A			Subcell pH : RBC	5													Target18 Name	Target 18					Transporter	Brain ABCB1 (P-gp/MDR1)
Abundance : Plasma ES PM Freq	0	Turnover rate : CYP2J2 Mean	0.0194	UGT2B4 EM Mean CV (%)	50	Corneocyte width [upper mid] CV (%) : Male	9.2	Colon CYP3A5 PM Mean CV (%)	N/A			Subcell pH : Pancreas	5													Target18 Rmax (µM)	0					Adult Max	1
Abundance : Plasma ES UM Freq	0	Turnover rate : CYP2J2 CV (%)	56	UGT2B4 PM Mean	0	Corneocyte length [upper mid] µm : Male	34.2	Colon CYP3A5 UM Mean	N/A			Subcell pH : Placenta	0													Target18 Rmax CV (%)	30					Fbirth	1
Abundance : Plasma ES IM Freq	0	Abundance : CYP3A4 EM Mean	137	UGT2B4 PM Mean CV (%)	0	Corneocyte length [upper mid] CV (%) : Male	4.1	Colon CYP3A5 UM Mean CV (%)	N/A			Local pH : Plasma	7.4													Target18 Kdeg (1/h)	0					Age50 (X50)	10
Abundance : FMO1 PM Freq	0	Abundance : CYP3A4 EM CV (%)	41	UGT2B4 UM Mean	0	Hydration level (% water volume) [upper mid] : Male	46.1	Colon CYP3A5 IM Mean	N/A			Local pH : EW	7.4													Target18 Kdeg CV (%)	30					n(Agen)	1
Abundance : FMO1 UM Freq	0	Abundance : CYP3A4 PM Mean	0	UGT2B4 UM Mean CV (%)	0	Hydration level (% water volume) [upper mid] CV (%) : Male	11	Colon CYP3A5 IM Mean CV (%)	N/A			Local pH : Generic IW	7													Target18 Kshed (1/hr)	0					Age-cap	0
Abundance : FMO1 IM Freq	0	Abundance : CYP3A4 PM CV (%)	0	UGT2B4 IM Mean	0	SC lipid viscosity [upper mid] centipose : Male	75	Colon CYP3A5 Mean Turnover Rate	N/A			Local pH : Gut ISF	7.23													Target18 Kshed CV (%)	30					Additional Function	No
Abundance : FMO3 PM Freq	0	Abundance : CYP3A4 UM Mean	0	UGT2B4 IM Mean CV (%)	0	SC lipid viscosity [upper mid] CV (%) : Male	0	Colon CYP3A5 Mean Turnover Rate CV (%)	N/A			Local pH : CSF	7.31													Target18 Lambda (1/h)	0
Abundance : FMO3 UM Freq	0	Abundance : CYP3A4 UM CV (%)	0	UGT2B4 Absolute Abundance	0.3	Corneocyte pH [lower mid] : Male	6.8	UGT1A1 EM Mean	1			Local pH : Pulmonary Fluid	6.6													Target19 Name	Target 19					Transporter	Brain ABCG2 (BCRP)
Abundance : FMO3 IM Freq	0	Abundance : CYP3A4 IM Mean	0	UGT2B4 Mean Turnover Rate	1e-06	Corneocyte pH [lower mid] CV (%) : Male	6.8	UGT1A1 EM Mean CV (%)	60			Subcell fraction : Adipose(%)	0													Target19 Rmax (µM)	0					Adult Max	1
Abundance : FMO5 PM Freq	0	Abundance : CYP3A4 IM CV (%)	0	UGT2B4 Mean Turnover Rate CV (%)	30	Corneocyte thickness [lower mid] µm : Male	0.91	UGT1A1 PM Mean	0.42			Subcell fraction : Bone(%)	0													Target19 Rmax CV (%)	30					Fbirth	1
Abundance : FMO5 UM Freq	0	Turnover rate : CYP3A4 Mean	0.0193	UGT2B7 EM Mean	1	Corneocyte thickness [lower mid] CV (%) : Male	36	UGT1A1 PM Mean CV (%)	60			Subcell fraction : Brain(%)	0													Target19 Kdeg (1/h)	0					Age50 (X50)	10
Abundance : FMO5 IM Freq	0	Turnover rate : CYP3A4 CV (%)	68	UGT2B7 EM Mean CV (%)	50	Corneocyte width [lower mid] µm : Male	27.7	UGT1A1 UM Mean	1.46			Subcell fraction : Gut(%)	0													Target19 Kdeg CV (%)	30					n(Agen)	1
Abundance : FMOUser PM Freq	0	Abundance : CYP3A5 EM Mean	103	UGT2B7 PM Mean	0	Corneocyte width [lower mid] CV (%) : Male	9.2	UGT1A1 UM Mean CV (%)	60			Subcell fraction : Heart(%)	0													Target19 Kshed (1/hr)	0					Age-cap	0
Abundance : FMOUser UM Freq	0	Abundance : CYP3A5 EM CV (%)	65	UGT2B7 PM Mean CV (%)	0	Corneocyte length [lower mid] µm : Male	34.2	UGT1A1 IM Mean	0.72			Subcell fraction : Kidney(%)	1													Target19 Kshed CV (%)	30					Additional Function	No
Abundance : FMOUser IM Freq	0	Abundance : CYP3A5 PM Mean	0	UGT2B7 UM Mean	0	Corneocyte length [lower mid] CV (%) : Male	4.1	UGT1A1 IM Mean CV (%)	60			Subcell fraction : Liver(%)	1													Target19 Lambda (1/h)	0
Abundance : ABCB1 (P-gp/MDR1) PT Freq	0	Abundance : CYP3A5 PM CV (%)	0	UGT2B7 UM Mean CV (%)	0	Hydration level (% water volume) [lower mid] : Male	56.75	UGT1A1 Absolute Abundance	8.5			Subcell fraction : Lung(%)	1													Target20 Name	Target 20					Transporter	Brain ABCC4 (MRP4)
Abundance : ABCB1 (P-gp/MDR1) IT Freq	0	Abundance : CYP3A5 UM Mean	0	UGT2B7 IM Mean	0	Hydration level (% water volume) [lower mid] CV (%) : Male	7	UGT1A3 EM Mean	1			Subcell fraction : Muscle(%)	0													Target20 Rmax (µM)	0					Adult Max	1
Abundance : ABCB1 (P-gp/MDR1) UT Freq	0	Abundance : CYP3A5 UM CV (%)	0	UGT2B7 IM Mean CV (%)	0	SC lipid viscosity [lower mid] centipose : Male	75	UGT1A3 EM Mean CV (%)	60			Subcell fraction : Skin(%)	0													Target20 Rmax CV (%)	30					Fbirth	1
Abundance : ABCB11 (BSEP) PT Freq	0	Abundance : CYP3A5 IM Mean	0	UGT2B7 Absolute Abundance	48	SC lipid viscosity [lower mid] CV (%) : Male	0	UGT1A3 PM Mean	0			Subcell fraction : Spleen(%)	0													Target20 Kdeg (1/h)	0					Age50 (X50)	10
Abundance : ABCB11 (BSEP) IT Freq	0	Abundance : CYP3A5 IM CV (%)	0	UGT2B7 Mean Turnover Rate	1e-06	Corneocyte pH [bottom] : Male	6.8	UGT1A3 PM Mean CV (%)	0			Subcell fraction : Pancreas(%)	0													Target20 Kdeg CV (%)	30					n(Agen)	1
Abundance : ABCB11 (BSEP) UT Freq	0	Turnover rate : CYP3A5 Mean	0.0193	UGT2B7 Mean Turnover Rate CV (%)	30	Corneocyte pH [bottom] CV (%) : Male	6.8	UGT1A3 UM Mean	0			Subcell fraction : Placenta(%)	0													Target20 Kshed (1/hr)	0					Age-cap	0
Abundance : ABCC1 (MRP1) PT Freq	0	Turnover rate : CYP3A5 CV (%)	68	UGT2B10 EM Mean	1	Corneocyte thickness [bottom] µm : Male	1.03	UGT1A3 UM Mean CV (%)	0			Liver model	PerMCL													Target20 Kshed CV (%)	30					Additional Function	No
Abundance : ABCC1 (MRP1) IT Freq	0	Abundance : CYP3A7 EM Mean	35.4	UGT2B10 EM Mean CV (%)	50	Corneocyte thickness [bottom] CV (%) : Male	36	UGT1A3 IM Mean	0			Liver : 1 VS (%)	5													Target20 Lambda (1/h)	0
Abundance : ABCC1 (MRP1) UT Freq	0	Abundance : CYP3A7 EM CV (%)	61	UGT2B10 PM Mean	0	Corneocyte width [bottom] µm : Male	27.7	UGT1A3 IM Mean CV (%)	0			Liver : 1 EW (%)	16.5																			Transporter	Apical Influx (BBB)
Abundance : ABCC2 (MRP2) PT Freq	0	Abundance : CYP3A7 PM Mean	0	UGT2B10 PM Mean CV (%)	0	Corneocyte width [bottom] CV (%) : Male	9.2	UGT1A3 Absolute Abundance	0.4			Liver : 1 NL (%)	3.48																			Adult Max	1
Abundance : ABCC2 (MRP2) IT Freq	0	Abundance : CYP3A7 PM CV (%)	0	UGT2B10 UM Mean	0	Corneocyte length [bottom] µm : Male	34.2	UGT1A4 EM Mean	1			Liver : 1 NP (%)	2.52																			Fbirth	1
Abundance : ABCC2 (MRP2) UT Freq	0	Abundance : CYP3A7 UM Mean	0	UGT2B10 UM Mean CV (%)	0	Corneocyte length [bottom] CV (%) : Male	4.1	UGT1A4 EM Mean CV (%)	60			Liver : 1 IW (%)	58.6																			Age50 (X50)	10
Abundance : ABCC3 (MRP3) PT Freq	0	Abundance : CYP3A7 UM CV (%)	0	UGT2B10 IM Mean	0	Hydration level (% water volume) [bottom] : Male	67.4	UGT1A4 PM Mean	0			Liver : 1 AP (mg/g)	5.09																			n(Agen)	1
Abundance : ABCC3 (MRP3) IT Freq	0	Abundance : CYP3A7 IM Mean	0	UGT2B10 IM Mean CV (%)	0	Hydration level (% water volume) [bottom] CV (%) : Male	4	UGT1A4 PM Mean CV (%)	0			Liver : 1 KpALB	0.086																			Age-cap	0
Abundance : ABCC3 (MRP3) UT Freq	0	Abundance : CYP3A7 IM CV (%)	0	UGT2B10 Absolute Abundance	0	SC lipid viscosity [bottom] centipose : Male	75	UGT1A4 UM Mean	0			Liver : 1 KpLPP	0.161																			Additional Function	No
Abundance : ABCC4 (MRP4) PT Freq	0	Turnover rate : CYP3A7 Mean	0.019	UGT2B10 Mean Turnover Rate	1e-06	SC lipid viscosity [bottom] CV (%) : Male	0	UGT1A4 UM Mean CV (%)	0			Liver : 1 Local pH (IW)	7
Abundance : ABCC4 (MRP4) IT Freq	0	Turnover rate : CYP3A7 CV (%)	68	UGT2B10 Mean Turnover Rate CV (%)	30	Viable Epidermis thickness µm : Male	50.05	UGT1A4 IM Mean	0			Liver : 1 Local pH (EW)	7.4																			Transporter	Apical Efflux (BCSFB)
Abundance : ABCC4 (MRP4) UT Freq	0	3A4 M / F difference	Same	UGT2B11 EM Mean	1	Viable Epidermis thickness CV (%) : Male	7	UGT1A4 IM Mean CV (%)	0			Liver : 2 VS (%)	5																			Adult Max	1
Abundance : ABCC6 (MRP6) PT Freq	0	Abundance : 3A4 Mean : Male	137	UGT2B11 EM Mean CV (%)	50	Dermis thickness µm : Male	1250	UGT1A4 Absolute Abundance	1.9			Liver : 2 EW (%)	16.5																			Fbirth	1
Abundance : ABCC6 (MRP6) IT Freq	0	Abundance : 3A4 CV (%) : Male	41	UGT2B11 PM Mean	0	Dermis thickness CV (%) : Male	45	UGT1A5 EM Mean	1			Liver : 2 NL (%)	3.48																			Age50 (X50)	10
Abundance : ABCC6 (MRP6) UT Freq	0	Abundance : 3A4 Mean : Female	137	UGT2B11 PM Mean CV (%)	0	Subcutis thickness mm : Male	1.91	UGT1A5 EM Mean CV (%)	60			Liver : 2 NP (%)	2.52																			n(Agen)	1
Abundance : ABCG2 (BCRP) PT Freq	0.02	Abundance : 3A4 CV (%) : Female	41	UGT2B11 UM Mean	0	Subcutis thickness CV (%) : Male	55.7	UGT1A5 PM Mean	0			Liver : 2 IW (%)	58.6																			Age-cap	0
Abundance : ABCG2 (BCRP) IT Freq	0.17	Abundance : CYP2C9 Allele 1 Genotype 1 Mean	83.4	UGT2B11 UM Mean CV (%)	0	Muscle thickness mm : Male	1.46	UGT1A5 PM Mean CV (%)	0			Liver : 2 AP (mg/g)	5.09																			Additional Function	No
Abundance : ABCG2 (BCRP) UT Freq	0	Abundance : CYP2C9 Allele 1 Genotype 1 CV (%)	60.5	UGT2B11 IM Mean	0	Muscle thickness CV (%) : Male	2.74	UGT1A5 UM Mean	0			Liver : 2 KpALB	0.086
Abundance : SLC2A2 (GLUT2) PT Freq	0	Turnover rate : CYP2C9 Allele 1 Genotype 1 Mean	0.0067	UGT2B11 IM Mean CV (%)	0	Dermis regional blood flow scalar : Male	2.13	UGT1A5 UM Mean CV (%)	0			Liver : 2 KpLPP	0.161																			Transporter	Apical Influx (BCSFB)
Abundance : SLC2A2 (GLUT2) IT Freq	0	Turnover rate : CYP2C9 Allele 1 Genotype 1 CV (%)	56	UGT2B11 Absolute Abundance	0	Dermis regional blood flow scalar CV (%) : Male	0	UGT1A5 IM Mean	0			Liver : 2 Local pH (IW)	7																			Adult Max	1
Abundance : SLC2A2 (GLUT2) UT Freq	0	Abundance : CYP2C9 Allele 1 Genotype 2 Mean	75.8	UGT2B11 Mean Turnover Rate	1e-06	Subcutis regional blood flow scalar : Male	1	UGT1A5 IM Mean CV (%)	0			Liver : 2 Local pH (EW)	7.4																			Fbirth	1
Abundance : SLC10A1 (NTCP) PT Freq	0	Abundance : CYP2C9 Allele 1 Genotype 2 CV (%)	63.8	UGT2B11 Mean Turnover Rate CV (%)	30	Subcutis regional blood flow scalar CV (%) : Male	0	UGT1A5 Absolute Abundance	0.3			Liver : 3 VS (%)	5																			Age50 (X50)	10
Abundance : SLC10A1 (NTCP) IT Freq	0	Turnover rate : CYP2C9 Allele 1 Genotype 2 Mean	0.0067	UGT2B15 EM Mean	1	Muscle regional blood flow scalar : Male	1	UGT1A6 EM Mean	1			Liver : 3 EW (%)	16.5																			n(Agen)	1
Abundance : SLC10A1 (NTCP) UT Freq	0	Turnover rate : CYP2C9 Allele 1 Genotype 2 CV (%)	56	UGT2B15 EM Mean CV (%)	50	Muscle regional blood flow scalar CV (%) : Male	0	UGT1A6 EM Mean CV (%)	60			Liver : 3 NL (%)	3.48																			Age-cap	0
Abundance : SLC10A2 (ASBT/IBAT) PT Freq	0	Abundance : CYP2C9 Allele 1 Genotype 3 Mean	75.8	UGT2B15 PM Mean	0.07			UGT1A6 PM Mean	0			Liver : 3 NP (%)	2.52																			Additional Function	No
Abundance : SLC10A2 (ASBT/IBAT) IT Freq	0	Abundance : CYP2C9 Allele 1 Genotype 3 CV (%)	63.8	UGT2B15 PM Mean CV (%)	50	MPMLA - Forearm Inner (volar)		UGT1A6 PM Mean CV (%)	0			Liver : 3 IW (%)	58.6
Abundance : SLC10A2 (ASBT/IBAT) UT Freq	0	Turnover rate : CYP2C9 Allele 1 Genotype 3 Mean	0.0067	UGT2B15 UM Mean	0	Skin surface pH : Male	4.5	UGT1A6 UM Mean	0			Liver : 3 AP (mg/g)	5.09																			Transporter	Kidney ABCB1 (P-gp/MDR1)
Abundance : SLC15A1 (PEPT1) PT Freq	0	Turnover rate : CYP2C9 Allele 1 Genotype 3 CV (%)	56	UGT2B15 UM Mean CV (%)	0	Skin surface pH CV (%) : Male	8.2	UGT1A6 UM Mean CV (%)	0			Liver : 3 KpALB	0.086																			Fmax	1
Abundance : SLC15A1 (PEPT1) IT Freq	0	Abundance : CYP2C9 Allele 1 Genotype 4 Mean	75.8	UGT2B15 IM Mean	0.47	Skin temperature °C : Male	32	UGT1A6 IM Mean	0			Liver : 3 KpLPP	0.161																			Fbirth	1e-06
Abundance : SLC15A1 (PEPT1) UT Freq	0	Abundance : CYP2C9 Allele 1 Genotype 4 CV (%)	63.8	UGT2B15 IM Mean CV (%)	50	Skin temperature CV (%) : Male	0	UGT1A6 IM Mean CV (%)	0			Liver : 3 Local pH (IW)	7																			Age50 (X50)	0.077
Abundance : SLC16A1 (MCT1) PT Freq	0	Turnover rate : CYP2C9 Allele 1 Genotype 4 Mean	0.0067	UGT2B15 Absolute Abundance	0.2	Shape of corneocyte : Male	Cuboid (brick)	UGT1A6 Absolute Abundance	1.3			Liver : 3 Local pH (EW)	7.4																			n(Agen)	0.73
Abundance : SLC16A1 (MCT1) IT Freq	0	Turnover rate : CYP2C9 Allele 1 Genotype 4 CV (%)	56	UGT2B15 Mean Turnover Rate	1e-06	Shape of corneocyte : Female	Cuboid (brick)	UGT1A7 EM Mean	1			Liver : 4 VS (%)	5																			Age-cap	25
Abundance : SLC16A1 (MCT1) UT Freq	0	Abundance : CYP2C9 Allele 1 Genotype 5 Mean	75.8	UGT2B15 Mean Turnover Rate CV (%)	30	Number of SC layers : Male	22	UGT1A7 EM Mean CV (%)	60			Liver : 4 EW (%)	16.5																			Additional Function	No
Abundance : SLCO1B1 (OATP1B1) PT Freq	0.03	Abundance : CYP2C9 Allele 1 Genotype 5 CV (%)	63.8	UGT2B17 EM Mean	1	Number of SC layers CV (%) : Male	20	UGT1A7 PM Mean	0			Liver : 4 NL (%)	3.48
Abundance : SLCO1B1 (OATP1B1) IT Freq	0.27	Turnover rate : CYP2C9 Allele 1 Genotype 5 Mean	0.0067	UGT2B17 EM Mean CV (%)	50	Water density gm/cm3 : Male	1	UGT1A7 PM Mean CV (%)	0			Liver : 4 NP (%)	2.52																			Transporter	Kidney ABCC4 (MRP4)
Abundance : SLCO1B1 (OATP1B1) UT Freq	0.07	Turnover rate : CYP2C9 Allele 1 Genotype 5 CV (%)	56	UGT2B17 PM Mean	0.08	Water density CV (%) : Male	0	UGT1A7 UM Mean	0			Liver : 4 IW (%)	58.6																			Fmax	1
Abundance : SLCO1B3 (OATP1B3) PT Freq	0	Abundance : CYP2C9 Allele 1 Genotype 6 Mean	23	UGT2B17 PM Mean CV (%)	50	SC lipids density gm/cm3 : Male	0.9	UGT1A7 UM Mean CV (%)	0			Liver : 4 AP (mg/g)	5.09																			Fbirth	1
Abundance : SLCO1B3 (OATP1B3) IT Freq	0	Abundance : CYP2C9 Allele 1 Genotype 6 CV (%)	60	UGT2B17 UM Mean	0	SC lipids density CV (%) : Male	0	UGT1A7 IM Mean	0			Liver : 4 KpALB	0.086																			Age50 (X50)	10
Abundance : SLCO1B3 (OATP1B3) UT Freq	0	Turnover rate : CYP2C9 Allele 1 Genotype 6 Mean	0.0067	UGT2B17 UM Mean CV (%)	0	SC proteins density gm/cm3 : Male	1.37	UGT1A7 IM Mean CV (%)	0			Liver : 4 KpLPP	0.161																			n(Agen)	1
Abundance : SLCO2B1 (OATP2B1) PT Freq	0	Turnover rate : CYP2C9 Allele 1 Genotype 6 CV (%)	56	UGT2B17 IM Mean	0.16	SC proteins density CV (%) : Male	0	UGT1A7 Absolute Abundance	7.1			Liver : 4 Local pH (IW)	7																			Age-cap	0
Abundance : SLCO2B1 (OATP2B1) IT Freq	0	Abundance : UGT1A1 EM Mean	1	UGT2B17 IM Mean CV (%)	50	Intercellular lipid thickness of SC µm : Male	0.091	UGT1A8 EM Mean	1			Liver : 4 Local pH (EW)	7.4																			Additional Function	No
Abundance : SLCO2B1 (OATP2B1) UT Freq	0	Abundance : UGT1A1 EM CV (%)	24	UGT2B17 Absolute Abundance	0	Intercellular lipid thickness of SC CV (%) : Male	0	UGT1A8 EM Mean CV (%)	60			Liver : 5 VS (%)	5
Abundance : SLCO4C1 (OATP4C1) PT Freq	0	Abundance : UGT1A1 PM Mean	0.42	UGT2B17 Mean Turnover Rate	1e-06	Tortuosity : Male	User Defined	UGT1A8 PM Mean	0			Liver : 5 EW (%)	16.5																			Transporter	Kidney SLC22A2 (OCT2)
Abundance : SLCO4C1 (OATP4C1) IT Freq	0	Abundance : UGT1A1 PM CV (%)	50.8	UGT2B17 Mean Turnover Rate CV (%)	30	Tortuosity of lipid diffusion pathway of SC : Male	12.7	UGT1A8 PM Mean CV (%)	0			Liver : 5 NL (%)	3.48																			Fmax	1
Abundance : SLCO4C1 (OATP4C1) UT Freq	0	Abundance : UGT1A1 UM Mean	1.46	UGT2B28 EM Mean	1	Tortuosity of lipid diffusion pathway of SC CV (%) : Male	18	UGT1A8 UM Mean	0			Liver : 5 NP (%)	2.52																			Fbirth	1e-06
Abundance : SLC22A1 (OCT1) PT Freq	0.0549	Abundance : UGT1A1 UM CV (%)	30	UGT2B28 EM Mean CV (%)	50	Hair follicle diameter µm : Male	77.7	UGT1A8 UM Mean CV (%)	0			Liver : 5 IW (%)	58.6																			Age50 (X50)	0.084
Abundance : SLC22A1 (OCT1) IT Freq	0.4043	Abundance : UGT1A1 IM Mean	0.72	UGT2B28 PM Mean	0	Hair follicle diameter CV (%) : Male	32	UGT1A8 IM Mean	0			Liver : 5 AP (mg/g)	5.09																			n(Agen)	1
Abundance : SLC22A1 (OCT1) UT Freq	0.0004	Abundance : UGT1A1 IM CV (%)	39.9	UGT2B28 PM Mean CV (%)	0	Hair follicle density N/cm2 : Male	18	UGT1A8 IM Mean CV (%)	0			Liver : 5 KpALB	0.086																			Age-cap	25
Abundance : SLC22A2 (OCT2) PT Freq	0	Absolute Abundance : UGT1A1	48	UGT2B28 UM Mean	0	Hair follicle density CV (%) : Male	39	UGT1A8 Absolute Abundance	5.6			Liver : 5 KpLPP	0.161																			Additional Function	No
Abundance : SLC22A2 (OCT2) IT Freq	0	Turnover rate : UGT1A1 Mean	0.0578	UGT2B28 UM Mean CV (%)	0	Hair follicle depth µm : Male	109.5	UGT1A9 EM Mean	1			Liver : 5 Local pH (IW)	7
Abundance : SLC22A2 (OCT2) UT Freq	0	Turnover rate : UGT1A1 CV (%)	30	UGT2B28 IM Mean	0	Hair follicle depth CV (%) : Male	0	UGT1A9 EM Mean CV (%)	60			Liver : 5 Local pH (EW)	7.4																			Transporter	Kidney SLC22A6 (OAT1)
Abundance : SLC22A3 (OCT3) PT Freq	0	Abundance : UGT1A3 EM Mean	1	UGT2B28 IM Mean CV (%)	0	Hair shaft diameter µm : Male	18	UGT1A9 PM Mean	0.07			Liver : 6 VS (%)	5																			Fmax	1
Abundance : SLC22A3 (OCT3) IT Freq	0	Abundance : UGT1A3 EM CV (%)	36	UGT2B28 Absolute Abundance	0	Hair shaft diameter CV (%) : Male	34	UGT1A9 PM Mean CV (%)	60			Liver : 6 EW (%)	16.5																			Fbirth	1e-06
Abundance : SLC22A3 (OCT3) UT Freq	0	Abundance : UGT1A3 PM Mean	0	UGT2B28 Mean Turnover Rate	1e-06	Sebum viscosity centipose : Male	40	UGT1A9 UM Mean	0			Liver : 6 NL (%)	3.48																			Age50 (X50)	0.379
Abundance : SLC22A4 (OCTN1) PT Freq	0	Abundance : UGT1A3 PM CV (%)	0	UGT2B28 Mean Turnover Rate CV (%)	30	Sebum viscosity CV (%) : Male	0	UGT1A9 UM Mean CV (%)	0			Liver : 6 NP (%)	2.52																			n(Agen)	0.43
Abundance : SLC22A4 (OCTN1) IT Freq	0	Abundance : UGT1A3 UM Mean	0	Use User UGT Option	Yes	Corneocyte pH [top] : Male	6.8	UGT1A9 IM Mean	0.19			Liver : 6 IW (%)	58.6																			Age-cap	25
Abundance : SLC22A4 (OCTN1) UT Freq	0	Abundance : UGT1A3 UM CV (%)	0	UGT User	1	Corneocyte pH [top] CV (%) : Male	6.8	UGT1A9 IM Mean CV (%)	60			Liver : 6 AP (mg/g)	5.09																			Additional Function	No
Abundance : SLC22A6 (OAT1) PT Freq	0	Abundance : UGT1A3 IM Mean	0	User UGT1 EM Mean	1	Corneocyte thickness [top] µm : Male	0.59	UGT1A9 Absolute Abundance	5.9			Liver : 6 KpALB	0.086
Abundance : SLC22A6 (OAT1) IT Freq	0	Abundance : UGT1A3 IM CV (%)	0	User UGT1 EM Mean CV (%)	50	Corneocyte thickness [top] CV (%) : Male	22	UGT1A10 EM Mean	1			Liver : 6 KpLPP	0.161																			Transporter	Kidney SLC22A8 (OAT3)
Abundance : SLC22A6 (OAT1) UT Freq	0	Absolute Abundance : UGT1A3	23	User UGT1 PM Mean	0	Corneocyte width [top] µm : Male	29.6	UGT1A10 EM Mean CV (%)	60			Liver : 6 Local pH (IW)	7																			Fmax	1
Abundance : SLC22A7 (OAT2) PT Freq	0	Turnover rate : UGT1A3 Mean	1e-06	User UGT1 PM Mean CV (%)	0	Corneocyte width [top] CV (%) : Male	5.9	UGT1A10 PM Mean	0			Liver : 6 Local pH (EW)	7.4																			Fbirth	1e-06
Abundance : SLC22A7 (OAT2) IT Freq	0	Turnover rate : UGT1A3 CV (%)	30	User UGT1 UM Mean	0	Corneocyte length [top] µm : Male	36.4	UGT1A10 PM Mean CV (%)	0																							Age50 (X50)	0.59
Abundance : SLC22A7 (OAT2) UT Freq	0	Abundance : UGT1A4 EM Mean	1	User UGT1 UM Mean CV (%)	0	Corneocyte length [top] CV (%) : Male	5.7	UGT1A10 UM Mean	0																							n(Agen)	0.51
Abundance : SLC22A8 (OAT3) PT Freq	0	Abundance : UGT1A4 EM CV (%)	26	User UGT1 IM Mean	0	Hydration level (% water volume) [top] : Male	33.9	UGT1A10 UM Mean CV (%)	0																							Age-cap	25
Abundance : SLC22A8 (OAT3) IT Freq	0	Abundance : UGT1A4 PM Mean	0	User UGT1 IM Mean CV (%)	0	Hydration level (% water volume) [top] CV (%) : Male	9	UGT1A10 IM Mean	0																							Additional Function	No
Abundance : SLC22A8 (OAT3) UT Freq	0	Abundance : UGT1A4 PM CV (%)	0	User UGT1 Absolute Abundance	0	SC lipid viscosity [top] centipose : Male	75	UGT1A10 IM Mean CV (%)	0
Abundance : SLC22A9 (OAT7) PT Freq	0	Abundance : UGT1A4 UM Mean	0	User UGT1 Mean Turnover Rate	1e-06	SC lipid viscosity [top] CV (%) : Male	0	UGT1A10 Absolute Abundance	4.3																							Transporter	Kidney SLC47As (MATEs)
Abundance : SLC22A9 (OAT7) IT Freq	0	Abundance : UGT1A4 UM CV (%)	0	User UGT1 Mean Turnover Rate CV (%)	30	Corneocyte pH [upper mid] : Male	6.8	UGT2B4 EM Mean	1																							Fmax	1
Abundance : SLC22A9 (OAT7) UT Freq	0	Abundance : UGT1A4 IM Mean	0	Use User Cytosolic Enzyme Option	Yes	Corneocyte pH [upper mid] CV (%) : Male	6.8	UGT2B4 EM Mean CV (%)	60																							Fbirth	1
Abundance : SLC29A1 (ENT1) PT Freq	0	Abundance : UGT1A4 IM CV (%)	0	User Cyt	1	Corneocyte thickness [upper mid] µm : Male	0.67	UGT2B4 PM Mean	0																							Age50 (X50)	10
Abundance : SLC29A1 (ENT1) IT Freq	0	Absolute Abundance : UGT1A4	52	User Cyt1 EM Mean	1	Corneocyte thickness [upper mid] CV (%) : Male	22	UGT2B4 PM Mean CV (%)	0																							n(Agen)	1
Abundance : SLC29A1 (ENT1) UT Freq	0	Turnover rate : UGT1A4 Mean	1e-06	User Cyt1 EM Mean CV (%)	30	Corneocyte width [upper mid] µm : Male	29.6	UGT2B4 UM Mean	0																							Age-cap	0
Abundance : SLC29A2 (ENT2) PT Freq	0	Turnover rate : UGT1A4 CV (%)	30	User Cyt1 PM Mean	0	Corneocyte width [upper mid] CV (%) : Male	5.9	UGT2B4 UM Mean CV (%)	0																							Additional Function	No
Abundance : SLC29A2 (ENT2) IT Freq	0	Abundance : UGT1A5 EM Mean	1	User Cyt1 PM Mean CV (%)	0	Corneocyte length [upper mid] µm : Male	36.4	UGT2B4 IM Mean	0
Abundance : SLC29A2 (ENT2) UT Freq	0	Abundance : UGT1A5 EM CV (%)	30	User Cyt1 UM Mean	0	Corneocyte length [upper mid] CV (%) : Male	5.7	UGT2B4 IM Mean CV (%)	0																							Transporter	Apical Influx
Abundance : SLC47A1 (MATE1) PT Freq	0	Abundance : UGT1A5 PM Mean	0	User Cyt1 UM Mean CV (%)	0	Hydration level (% water volume) [upper mid] : Male	44.6987	UGT2B4 Absolute Abundance	0																							Fmax	1
Abundance : SLC47A1 (MATE1) IT Freq	0	Abundance : UGT1A5 PM CV (%)	0	User Cyt1 IM Mean	0	Hydration level (% water volume) [upper mid] CV (%) : Male	6	UGT2B7 EM Mean	1																							Fbirth	1
Abundance : SLC47A1 (MATE1) UT Freq	0	Abundance : UGT1A5 UM Mean	0	User Cyt1 IM Mean CV (%)	0	SC lipid viscosity [upper mid] centipose : Male	75	UGT2B7 EM Mean CV (%)	60																							Age50 (X50)	10
Abundance : SLC47As (MATEs) PT Freq	0	Abundance : UGT1A5 UM CV (%)	0	Use User Cytosolic Enzyme Option	Yes	SC lipid viscosity [upper mid] CV (%) : Male	0	UGT2B7 PM Mean	0																							n(Agen)	1
Abundance : SLC47As (MATEs) IT Freq	0	Abundance : UGT1A5 IM Mean	0	User Cyt	2	Corneocyte pH [lower mid] : Male	6.8	UGT2B7 PM Mean CV (%)	0																							Age-cap	0
Abundance : SLC47As (MATEs) UT Freq	0	Abundance : UGT1A5 IM CV (%)	0	User Cyt2 EM Mean	1	Corneocyte pH [lower mid] CV (%) : Male	6.8	UGT2B7 UM Mean	0																							Additional Function	No
Abundance : SLC51A/B (OST-α/β) PT Freq	0	Absolute Abundance : UGT1A5	0	User Cyt2 EM Mean CV (%)	30	Corneocyte thickness [lower mid] µm : Male	0.76	UGT2B7 UM Mean CV (%)	0
Abundance : SLC51A/B (OST-α/β) IT Freq	0	Turnover rate : UGT1A5 Mean	1e-06	User Cyt2 PM Mean	0	Corneocyte thickness [lower mid] CV (%) : Male	22	UGT2B7 IM Mean	0																							Transporter	Basolateral Efflux (Kidney)
Abundance : SLC51A/B (OST-α/β) UT Freq	0	Turnover rate : UGT1A5 CV (%)	30	User Cyt2 PM Mean CV (%)	0	Corneocyte width [lower mid] µm : Male	29.6	UGT2B7 IM Mean CV (%)	0																							Fmax	0
Abundance : Apical Influx (Intestine) PT Freq	0	Abundance : UGT1A6 EM Mean	1	User Cyt2 UM Mean	0	Corneocyte width [lower mid] CV (%) : Male	5.9	UGT2B7 Absolute Abundance	4.5																							Fbirth	0
Abundance : Apical Influx (Intestine) IT Freq	0	Abundance : UGT1A6 EM CV (%)	30	User Cyt2 UM Mean CV (%)	0	Corneocyte length [lower mid] µm : Male	36.4	UGT2B10 EM Mean	1																							Age50 (X50)	0
Abundance : Apical Influx (Intestine) UT Freq	0	Abundance : UGT1A6 PM Mean	0	User Cyt2 IM Mean	0	Corneocyte length [lower mid] CV (%) : Male	5.7	UGT2B10 EM Mean CV (%)	60																							n(Agen)	0
Abundance : Apical Efflux (Intestine) PT Freq	0	Abundance : UGT1A6 PM CV (%)	0	User Cyt2 IM Mean CV (%)	0	Hydration level (% water volume) [lower mid] : Male	55.5388	UGT2B10 PM Mean	0																							Age-cap	0
Abundance : Apical Efflux (Intestine) IT Freq	0	Abundance : UGT1A6 UM Mean	0	Use User Cytosolic Enzyme Option	Yes	Hydration level (% water volume) [lower mid] CV (%) : Male	5	UGT2B10 PM Mean CV (%)	0																							Additional Function	No
Abundance : Apical Efflux (Intestine) UT Freq	0	Abundance : UGT1A6 UM CV (%)	0	User Cyt	3	SC lipid viscosity [lower mid] centipose : Male	75	UGT2B10 UM Mean	0
Abundance : Sinusoidal Uptake (Liver) PT Freq	0	Abundance : UGT1A6 IM Mean	0	User Cyt3 EM Mean	1	SC lipid viscosity [lower mid] CV (%) : Male	0	UGT2B10 UM Mean CV (%)	0																							Adipose Volume Male CV (%)	0
Abundance : Sinusoidal Uptake (Liver) IT Freq	0	Abundance : UGT1A6 IM CV (%)	0	User Cyt3 EM Mean CV (%)	30	Corneocyte pH [bottom] : Male	6.8	UGT2B10 IM Mean	0																							Adipose Volume Female CV (%)	0
Abundance : Sinusoidal Uptake (Liver) UT Freq	0	Absolute Abundance : UGT1A6	20	User Cyt3 PM Mean	0	Corneocyte pH [bottom] CV (%) : Male	6.8	UGT2B10 IM Mean CV (%)	0																							Bone Volume Male CV (%)	0
Abundance : Sinusoidal Efflux (Liver) PT Freq	0	Turnover rate : UGT1A6 Mean	1e-06	User Cyt3 PM Mean CV (%)	0	Corneocyte thickness [bottom] µm : Male	0.86	UGT2B10 Absolute Abundance	0.1																							Bone Volume Feale CV (%)	0
Abundance : Sinusoidal Efflux (Liver) IT Freq	0	Turnover rate : UGT1A6 CV (%)	30	User Cyt3 UM Mean	0	Corneocyte thickness [bottom] CV (%) : Male	22	UGT2B11 EM Mean	1																							Brain Volume Male CV (%)	0
Abundance : Sinusoidal Efflux (Liver) UT Freq	0	Abundance : UGT1A7 EM Mean	1	User Cyt3 UM Mean CV (%)	0	Corneocyte width [bottom] µm : Male	29.6	UGT2B11 EM Mean CV (%)	60																							Brain Volume Female CV (%)	0
Abundance : Canalicular Efflux (Liver) PT Freq	0	Abundance : UGT1A7 EM CV (%)	30	User Cyt3 IM Mean	0	Corneocyte width [bottom] CV (%) : Male	5.9	UGT2B11 PM Mean	0																							Gut Volume Male CV (%)	0
Abundance : Canalicular Efflux (Liver) IT Freq	0	Abundance : UGT1A7 PM Mean	0	User Cyt3 IM Mean CV (%)	0	Corneocyte length [bottom] µm : Male	36.4	UGT2B11 PM Mean CV (%)	0																							Gut Volume Female CV (%)	0
Abundance : Canalicular Efflux (Liver) UT Freq	0	Abundance : UGT1A7 PM CV (%)	0	Use User Cytosolic Enzyme Option	Yes	Corneocyte length [bottom] CV (%) : Male	5.7	UGT2B11 UM Mean	0																							Heart Volume Male CV (%)	0
Abundance : Apical Influx (Kidney) PT Freq	0	Abundance : UGT1A7 UM Mean	0	User Cyt	4	Hydration level (% water volume) [bottom] : Male	66.4	UGT2B11 UM Mean CV (%)	0																							Heart Volume Female CV (%)	0
Abundance : Apical Influx (Kidney) IT Freq	0	Abundance : UGT1A7 UM CV (%)	0	User Cyt4 EM Mean	1	Hydration level (% water volume) [bottom] CV (%) : Male	4	UGT2B11 IM Mean	0																							Lung Volume Male CV (%)	0
Abundance : Apical Influx (Kidney) UT Freq	0	Abundance : UGT1A7 IM Mean	0	User Cyt4 EM Mean CV (%)	30	SC lipid viscosity [bottom] centipose : Male	75	UGT2B11 IM Mean CV (%)	0																							Lung Volume Female CV (%)	0
Abundance : Basolateral Efflux (Kidney) PT Freq	0	Abundance : UGT1A7 IM CV (%)	0	User Cyt4 PM Mean	0	SC lipid viscosity [bottom] CV (%) : Male	0	UGT2B11 Absolute Abundance	0																							Muscle Volume Male CV (%)	0
Abundance : Basolateral Efflux (Kidney) IT Freq	0	Absolute Abundance : UGT1A7	0	User Cyt4 PM Mean CV (%)	0	Viable Epidermis thickness µm : Male	41.9655	UGT2B15 EM Mean	1																							Muscle Volume Female CV (%)	0
Abundance : Basolateral Efflux (Kidney) UT Freq	0	Turnover rate : UGT1A7 Mean	1e-06	User Cyt4 UM Mean	0	Viable Epidermis thickness CV (%) : Male	19	UGT2B15 EM Mean CV (%)	60																							Pancreas Volume Male CV (%)	0
Abundance : Basolateral Influx (Intestine) PT Freq	0	Turnover rate : UGT1A7 CV (%)	30	User Cyt4 UM Mean CV (%)	0	Dermis thickness µm : Male	1240	UGT2B15 PM Mean	0.07																							Pancreas Volume Female CV (%)	0
Abundance : Basolateral Influx (Intestine) IT Freq	0	Abundance : UGT1A8 EM Mean	1	User Cyt4 IM Mean	0	Dermis thickness CV (%) : Male	20	UGT2B15 PM Mean CV (%)	60																							Skin Volume Male CV (%)	0
Abundance : Basolateral Influx (Intestine) UT Freq	0	Abundance : UGT1A8 EM CV (%)	30	User Cyt4 IM Mean CV (%)	0	Subcutis thickness mm : Male	1.91	UGT2B15 UM Mean	0																							Skin Volume Female CV (%)	0
Abundance : Basolateral Efflux (Intestine) PT Freq	0	Abundance : UGT1A8 PM Mean	0	CES1 EM Mean	1	Subcutis thickness CV (%) : Male	55.7	UGT2B15 UM Mean CV (%)	0																							Spleen Volume Male CV (%)	0
Abundance : Basolateral Efflux (Intestine) IT Freq	0	Abundance : UGT1A8 PM CV (%)	0	CES1 EM CV (%)	30	Muscle thickness mm : Male	29.88	UGT2B15 IM Mean	0.47																							Spleen Volume Female CV (%)	0
Abundance : Basolateral Efflux (Intestine) UT Freq	0	Abundance : UGT1A8 UM Mean	0	CES1 PM Mean	0.11	Muscle thickness CV (%) : Male	61.44	UGT2B15 IM Mean CV (%)	60																							Blood Volume Male CV (%)	0
		Abundance : UGT1A8 UM CV (%)	0	CES1 PM CV (%)	30	Dermis regional blood flow scalar : Male	0.909226	UGT2B15 Absolute Abundance	0.1																							Blood Volume Female CV (%)	0
		Abundance : UGT1A8 IM Mean	0	CES1 UM Mean	0	Dermis regional blood flow scalar CV (%) : Male	0	UGT2B17 EM Mean	1																							Site:	ForeHead
		Abundance : UGT1A8 IM CV (%)	0	CES1 UM CV (%)	0	Subcutis regional blood flow scalar : Male	1	UGT2B17 EM Mean CV (%)	60																							Parameter:	Skin Surface pH
		Absolute Abundance : UGT1A8	0	CES1 IM Mean	0	Subcutis regional blood flow scalar CV (%) : Male	0	UGT2B17 PM Mean	0.08																							Exponential C0	1.01
		Turnover rate : UGT1A8 Mean	1e-06	CES1 IM CV (%)	0	Muscle regional blood flow scalar : Male	1	UGT2B17 PM Mean CV (%)	60																							Exponential C1	0.2
		Turnover rate : UGT1A8 CV (%)	30	CES2 EM Mean	1	Muscle regional blood flow scalar CV (%) : Male	0	UGT2B17 UM Mean	0																							Exponential C2	22.13
		Abundance : UGT1A9 EM Mean	1	CES2 EM CV (%)	30			UGT2B17 UM Mean CV (%)	0																							Parameter:	SC Thickness
		Abundance : UGT1A9 EM CV (%)	30	CES2 PM Mean	0	MPMLA - Forearm Outer (dorsal)		UGT2B17 IM Mean	0.16																							Sigmoidal Male FBirth	0.5
		Abundance : UGT1A9 PM Mean	0.07	CES2 PM CV (%)	0	Skin surface pH : Male	4.5	UGT2B17 IM Mean CV (%)	60																							Sigmoidal Male AdultMax	1.01
		Abundance : UGT1A9 PM CV (%)	30	CES2 UM Mean	0	Skin surface pH CV (%) : Male	8.2	UGT2B17 Absolute Abundance	11																							Sigmoidal Male Age50	2.72
		Abundance : UGT1A9 UM Mean	0	CES2 UM CV (%)	0	Skin temperature °C : Male	32	UGT2B28 EM Mean	1																							Sigmoidal Male n	3.43
		Abundance : UGT1A9 UM CV (%)	0	CES2 IM Mean	0	Skin temperature CV (%) : Male	0	UGT2B28 EM Mean CV (%)	60																							Sigmoidal Female FBirth	0.5
		Abundance : UGT1A9 IM Mean	0.19	CES2 IM CV (%)	0	Shape of corneocyte : Male	Cuboid (brick)	UGT2B28 PM Mean	0																							Sigmoidal Female AdultMax	1.01
		Abundance : UGT1A9 IM CV (%)	30	Use User ES Option	Yes	Shape of corneocyte : Female	Cuboid (brick)	UGT2B28 PM Mean CV (%)	0																							Sigmoidal Female Age50	2.72
		Absolute Abundance : UGT1A9	31	User ES EM Mean	1	Number of SC layers : Male	22	UGT2B28 UM Mean	0																							Sigmoidal Female n	3.43
		Turnover rate : UGT1A9 Mean	1e-06	User ES EM CV (%)	30	Number of SC layers CV (%) : Male	20	UGT2B28 UM Mean CV (%)	0																							Parameter:	Viable Epidermis Thickness
		Turnover rate : UGT1A9 CV (%)	30	User ES PM Mean	0	Water density gm/cm3 : Male	1	UGT2B28 IM Mean	0																							Sigmoidal Male FBirth	0.64
		Abundance : UGT1A10 EM Mean	1	User ES PM CV (%)	0	Water density CV (%) : Male	0	UGT2B28 IM Mean CV (%)	0																							Sigmoidal Male AdultMax	1.04
		Abundance : UGT1A10 EM CV (%)	30	User ES UM Mean	0	SC lipids density gm/cm3 : Male	0.9	UGT2B28 Absolute Abundance	0																							Sigmoidal Male Age50	14.31
		Abundance : UGT1A10 PM Mean	0	User ES UM CV (%)	0	SC lipids density CV (%) : Male	0	Use User UGT Option	Yes																							Sigmoidal Male n	4.18
		Abundance : UGT1A10 PM CV (%)	0	User ES IM Mean	0	SC proteins density gm/cm3 : Male	1.37	UGT User	1																							Sigmoidal Female FBirth	0.64
		Abundance : UGT1A10 UM Mean	0	User ES IM CV (%)	0	SC proteins density CV (%) : Male	0	User UGT1 EM Mean	1																							Sigmoidal Female AdultMax	1.04
		Abundance : UGT1A10 UM CV (%)	0	EM Mean	0	Intercellular lipid thickness of SC µm : Male	0.091	User UGT1 EM Mean CV (%)	60																							Sigmoidal Female Age50	14.31
		Abundance : UGT1A10 IM Mean	0	EM CV (%)	0	Intercellular lipid thickness of SC CV (%) : Male	0	User UGT1 PM Mean	0																							Sigmoidal Female n	4.18
		Abundance : UGT1A10 IM CV (%)	0	PM Mean	0	Tortuosity : Male	User Defined	User UGT1 PM Mean CV (%)	0																							Parameter:	Total Skin Thickness
		Absolute Abundance : UGT1A10	0.02	PM CV (%)	0	Tortuosity of lipid diffusion pathway of SC : Male	12.7	User UGT1 UM Mean	0																							Sigmoidal Male FBirth	0.72
		Turnover rate : UGT1A10 Mean	1e-06	UM Mean	0	Tortuosity of lipid diffusion pathway of SC CV (%) : Male	18	User UGT1 UM Mean CV (%)	0																							Sigmoidal Male AdultMax	1.01
		Turnover rate : UGT1A10 CV (%)	30	UM CV (%)	0	Hair follicle diameter µm : Male	77.7	User UGT1 IM Mean	0																							Sigmoidal Male Age50	16.5
		Abundance : UGT2B4 EM Mean	1	IM Mean	0	Hair follicle diameter CV (%) : Male	32	User UGT1 IM Mean CV (%)	0																							Sigmoidal Male n	6.09
		Abundance : UGT2B4 EM CV (%)	28	IM CV (%)	0	Hair follicle density N/cm2 : Male	18	User UGT1 Absolute Abundance	0																							Sigmoidal Female FBirth	0.72
		Abundance : UGT2B4 PM Mean	0	EM Mean	0	Hair follicle density CV (%) : Male	39	Use User Cytosolic Enzyme Option	Yes																							Sigmoidal Female AdultMax	1.01
		Abundance : UGT2B4 PM CV (%)	0	EM CV (%)	0	Hair follicle depth µm : Male	109.5	User Cyt	1																							Sigmoidal Female Age50	16.5
		Abundance : UGT2B4 UM Mean	0	PM Mean	0	Hair follicle depth CV (%) : Male	0	User Cyt1 EM Mean	1																							Sigmoidal Female n	6.09
		Abundance : UGT2B4 UM CV (%)	0	PM CV (%)	0	Hair shaft diameter µm : Male	18	User Cyt1 EM Mean CV (%)	60																							Parameter:	Local Subcutaneous Thickness
		Abundance : UGT2B4 IM Mean	0	UM Mean	0	Hair shaft diameter CV (%) : Male	34	User Cyt1 PM Mean	0																							Sigmoidal Male FBirth	0.67
		Abundance : UGT2B4 IM CV (%)	0	UM CV (%)	0	Sebum viscosity centipose : Male	40	User Cyt1 PM Mean CV (%)	0																							Sigmoidal Male AdultMax	1.19
		Absolute Abundance : UGT2B4	54	IM Mean	0	Sebum viscosity CV (%) : Male	0	User Cyt1 UM Mean	0																							Sigmoidal Male Age50	16.21
		Turnover rate : UGT2B4 Mean	1e-06	IM CV (%)	0	Corneocyte pH [top] : Male	6.8	User Cyt1 UM Mean CV (%)	0																							Sigmoidal Male n	1.6
		Turnover rate : UGT2B4 CV (%)	30	FMO1 Absolute Abundance	5	Corneocyte pH [top] CV (%) : Male	6.8	User Cyt1 IM Mean	0																							Sigmoidal Female FBirth	0.37
		Abundance : UGT2B7 EM Mean	1	FMO1 EM Mean	1	Corneocyte thickness [top] µm : Male	0.69	User Cyt1 IM Mean CV (%)	0																							Sigmoidal Female AdultMax	1.38
		Abundance : UGT2B7 EM CV (%)	30.4	FMO1 EM CV (%)	35	Corneocyte thickness [top] CV (%) : Male	22	Use User Cytosolic Enzyme Option	Yes																							Sigmoidal Female Age50	17.3
		Abundance : UGT2B7 PM Mean	0	FMO1 PM Mean	0	Corneocyte width [top] µm : Male	29.6	User Cyt	2																							Sigmoidal Female n	1.83
		Abundance : UGT2B7 PM CV (%)	0	FMO1 PM CV (%)	0	Corneocyte width [top] CV (%) : Male	5.9	User Cyt2 EM Mean	1																							Parameter:	Local Muscle Thickness
		Abundance : UGT2B7 UM Mean	0	FMO1 UM Mean	0	Corneocyte length [top] µm : Male	36.4	User Cyt2 EM Mean CV (%)	60																							Linear C0	0.385
		Abundance : UGT2B7 UM CV (%)	0	FMO1 UM CV (%)	0	Corneocyte length [top] CV (%) : Male	5.7	User Cyt2 PM Mean	0																							Linear C1	0.014
		Abundance : UGT2B7 IM Mean	0	FMO1 IM Mean	0	Hydration level (% water volume) [top] : Male	33.9	User Cyt2 PM Mean CV (%)	0
		Abundance : UGT2B7 IM CV (%)	0	FMO1 IM CV (%)	0	Hydration level (% water volume) [top] CV (%) : Male	9	User Cyt2 UM Mean	0																							Site:	ForearmInner
		Absolute Abundance : UGT2B7	71	FMO3 Absolute Abundance	0.47	SC lipid viscosity [top] centipose : Male	75	User Cyt2 UM Mean CV (%)	0																							Parameter:	Skin Surface pH
		Turnover rate : UGT2B7 Mean	1e-06	FMO3 EM Mean	1	SC lipid viscosity [top] CV (%) : Male	0	User Cyt2 IM Mean	0																							Exponential C0	1.01
		Turnover rate : UGT2B7 CV (%)	30	FMO3 EM CV (%)	79	Corneocyte pH [upper mid] : Male	6.8	User Cyt2 IM Mean CV (%)	0																							Exponential C1	0.35
		Abundance : UGT2B10 EM Mean	1	FMO3 PM Mean	0	Corneocyte pH [upper mid] CV (%) : Male	6.8	Use User Cytosolic Enzyme Option	Yes																							Exponential C2	27.61
		Abundance : UGT2B10 EM CV (%)	30	FMO3 PM CV (%)	0	Corneocyte thickness [upper mid] µm : Male	0.79	User Cyt	3																							Parameter:	SC Thickness
		Abundance : UGT2B10 PM Mean	0	FMO3 UM Mean	0	Corneocyte thickness [upper mid] CV (%) : Male	22	User Cyt3 EM Mean	1																							Sigmoidal Male FBirth	0.5
		Abundance : UGT2B10 PM CV (%)	0	FMO3 UM CV (%)	0	Corneocyte width [upper mid] µm : Male	29.6	User Cyt3 EM Mean CV (%)	60																							Sigmoidal Male AdultMax	1.01
		Abundance : UGT2B10 UM Mean	0	FMO3 IM Mean	0	Corneocyte width [upper mid] CV (%) : Male	5.9	User Cyt3 PM Mean	0																							Sigmoidal Male Age50	2.72
		Abundance : UGT2B10 UM CV (%)	0	FMO3 IM CV (%)	0	Corneocyte length [upper mid] µm : Male	36.4	User Cyt3 PM Mean CV (%)	0																							Sigmoidal Male n	3.43
		Abundance : UGT2B10 IM Mean	0	FMO5 Absolute Abundance	2.6	Corneocyte length [upper mid] CV (%) : Male	5.7	User Cyt3 UM Mean	0																							Sigmoidal Female FBirth	0.5
		Abundance : UGT2B10 IM CV (%)	0	FMO5 EM Mean	1	Hydration level (% water volume) [upper mid] : Male	44.6987	User Cyt3 UM Mean CV (%)	0																							Sigmoidal Female AdultMax	1.01
		Absolute Abundance : UGT2B10	6.5	FMO5 EM CV (%)	57	Hydration level (% water volume) [upper mid] CV (%) : Male	6	User Cyt3 IM Mean	0																							Sigmoidal Female Age50	2.72
		Turnover rate : UGT2B10 Mean	1e-06	FMO5 PM Mean	0	SC lipid viscosity [upper mid] centipose : Male	75	User Cyt3 IM Mean CV (%)	0																							Sigmoidal Female n	3.43
		Turnover rate : UGT2B10 CV (%)	30	FMO5 PM CV (%)	0	SC lipid viscosity [upper mid] CV (%) : Male	0	Use User Cytosolic Enzyme Option	Yes																							Parameter:	Viable Epidermis Thickness
		Abundance : UGT2B11 EM Mean	1	FMO5 UM Mean	0	Corneocyte pH [lower mid] : Male	6.8	User Cyt	4																							Sigmoidal Male FBirth	0.64
		Abundance : UGT2B11 EM CV (%)	30	FMO5 UM CV (%)	0	Corneocyte pH [lower mid] CV (%) : Male	6.8	User Cyt4 EM Mean	1																							Sigmoidal Male AdultMax	1.04
		Abundance : UGT2B11 PM Mean	0	FMO5 IM Mean	0	Corneocyte thickness [lower mid] µm : Male	0.89	User Cyt4 EM Mean CV (%)	60																							Sigmoidal Male Age50	14.31
		Abundance : UGT2B11 PM CV (%)	0	FMO5 IM CV (%)	0	Corneocyte thickness [lower mid] CV (%) : Male	22	User Cyt4 PM Mean	0																							Sigmoidal Male n	4.18
		Abundance : UGT2B11 UM Mean	0	FMOUser Absolute Abundance	0	Corneocyte width [lower mid] µm : Male	29.6	User Cyt4 PM Mean CV (%)	0																							Sigmoidal Female FBirth	0.64
		Abundance : UGT2B11 UM CV (%)	0	FMOUser EM Mean	1	Corneocyte width [lower mid] CV (%) : Male	5.9	User Cyt4 UM Mean	0																							Sigmoidal Female AdultMax	1.04
		Abundance : UGT2B11 IM Mean	0	FMOUser EM CV (%)	30	Corneocyte length [lower mid] µm : Male	36.4	User Cyt4 UM Mean CV (%)	0																							Sigmoidal Female Age50	14.31
		Abundance : UGT2B11 IM CV (%)	0	FMOUser PM Mean	0	Corneocyte length [lower mid] CV (%) : Male	5.7	User Cyt4 IM Mean	0																							Sigmoidal Female n	4.18
		Absolute Abundance : UGT2B11	0	FMOUser PM CV (%)	0	Hydration level (% water volume) [lower mid] : Male	55.5388	User Cyt4 IM Mean CV (%)	0																							Parameter:	Total Skin Thickness
		Turnover rate : UGT2B11 Mean	1e-06	FMOUser UM Mean	0	Hydration level (% water volume) [lower mid] CV (%) : Male	5	CES1 EM Mean	1																							Sigmoidal Male FBirth	0.72
		Turnover rate : UGT2B11 CV (%)	30	FMOUser UM CV (%)	0	SC lipid viscosity [lower mid] centipose : Male	75	CES1 EM CV (%)	30																							Sigmoidal Male AdultMax	1.01
		Abundance : UGT2B15 EM Mean	1	FMOUser IM Mean	0	SC lipid viscosity [lower mid] CV (%) : Male	0	CES1 PM Mean	0.11																							Sigmoidal Male Age50	16.5
		Abundance : UGT2B15 EM CV (%)	34	FMOUser IM CV (%)	0	Corneocyte pH [bottom] : Male	6.8	CES1 PM CV (%)	30																							Sigmoidal Male n	6.09
		Abundance : UGT2B15 PM Mean	0.07	Cortex/Medulla Ratio	0.92	Corneocyte pH [bottom] CV (%) : Male	6.8	CES1 UM Mean	0																							Sigmoidal Female FBirth	0.72
		Abundance : UGT2B15 PM CV (%)	33	Peritubular Capillary (% Kidney volume)	7	Corneocyte thickness [bottom] µm : Male	1	CES1 UM CV (%)	0																							Sigmoidal Female AdultMax	1.01
		Abundance : UGT2B15 UM Mean	0	Million Nephrons per Subject Baseline	0.22693	Corneocyte thickness [bottom] CV (%) : Male	22	CES1 IM Mean	0																							Sigmoidal Female Age50	16.5
		Abundance : UGT2B15 UM CV (%)	0	Kidney Weight Coefficient	0.003948	Corneocyte width [bottom] µm : Male	29.6	CES1 IM CV (%)	0																							Sigmoidal Female n	6.09
		Abundance : UGT2B15 IM Mean	0.47	Proximal Tubule Length (mm)	18	Corneocyte width [bottom] CV (%) : Male	5.9	CES2 EM Mean	1																							Parameter:	Local Subcutaneous Thickness
		Abundance : UGT2B15 IM CV (%)	37	Henle's Loop Length (mm)	7	Corneocyte length [bottom] µm : Male	36.4	CES2 EM CV (%)	30																							Sigmoidal Male FBirth	0.67
		Absolute Abundance : UGT2B15	39	Distal Tubule Length (mm)	5.5	Corneocyte length [bottom] CV (%) : Male	5.7	CES2 PM Mean	0																							Sigmoidal Male AdultMax	1.19
		Turnover rate : UGT2B15 Mean	1e-06	Collecting Duct Length (mm)	22	Hydration level (% water volume) [bottom] : Male	66.4	CES2 PM CV (%)	0																							Sigmoidal Male Age50	16.21
		Turnover rate : UGT2B15 CV (%)	30	Proximal Tubule Diameter (mm)	0.06	Hydration level (% water volume) [bottom] CV (%) : Male	4	CES2 UM Mean	0																							Sigmoidal Male n	1.6
		Abundance : UGT2B17 EM Mean	1	Henle's Loop Diameter (mm)	0.018	SC lipid viscosity [bottom] centipose : Male	75	CES2 UM CV (%)	0																							Sigmoidal Female FBirth	0.37
		Abundance : UGT2B17 EM CV (%)	28	Distal Tubule Diameter (mm)	0.05	SC lipid viscosity [bottom] CV (%) : Male	0	CES2 IM Mean	0																							Sigmoidal Female AdultMax	1.38
		Abundance : UGT2B17 PM Mean	0.08	Collecting Duct Diameter (mm)	0.2	Viable Epidermis thickness µm : Male	53.5684	CES2 IM CV (%)	0																							Sigmoidal Female Age50	17.3
		Abundance : UGT2B17 PM CV (%)	40	Proximal Tubule pH	7.4	Viable Epidermis thickness CV (%) : Male	21	Use User ES Option	Yes																							Sigmoidal Female n	1.83
		Abundance : UGT2B17 UM Mean	0	Henle's Loop pH	7.4	Dermis thickness µm : Male	1240	User ES EM Mean	1																							Parameter:	Local Muscle Thickness
		Abundance : UGT2B17 UM CV (%)	0	Distal Tubule pH	7.4	Dermis thickness CV (%) : Male	20	User ES EM CV (%)	30																							Linear C0	11.8
		Abundance : UGT2B17 IM Mean	0.16	Collecting Duct pH	7.4	Subcutis thickness mm : Male	1.91	User ES PM Mean	0																							Linear C1	0.18
		Abundance : UGT2B17 IM CV (%)	30	GFR Male Input Type	Predicted	Subcutis thickness CV (%) : Male	55.7	User ES PM CV (%)	0
		Absolute Abundance : UGT2B17	5.9	Male - Proximal Tubule Urine Flow Rate - GFR (mL/min)	130	Muscle thickness mm : Male	29.88	User ES UM Mean	0																							Site:	ForearmOuter
		Turnover rate : UGT2B17 Mean	1e-06	Male - Henle's Loop Urine Flow Rate (mL/min)	46.77	Muscle thickness CV (%) : Male	61.44	User ES UM CV (%)	0																							Parameter:	Skin Surface pH
		Turnover rate : UGT2B17 CV (%)	30	Male - Distal Tubule Urine Flow Rate (mL/min)	25.97	Dermis regional blood flow scalar : Male	0.5875	User ES IM Mean	0																							Exponential C0	1.01
		Abundance : UGT2B28 EM Mean	1	Male - Collecting Duct Urine Flow Rate (mL/min)	12.44	Dermis regional blood flow scalar CV (%) : Male	0	User ES IM CV (%)	0																							Exponential C1	0.35
		Abundance : UGT2B28 EM CV (%)	30	Male - Urine Flow Rate into Bladder (mL/min)	1	Subcutis regional blood flow scalar : Male	1	EM Mean	0																							Exponential C2	27.61
		Abundance : UGT2B28 PM Mean	0	GFR Female Input Type	Predicted	Subcutis regional blood flow scalar CV (%) : Male	0	EM CV (%)	0																							Parameter:	SC Thickness
		Abundance : UGT2B28 PM CV (%)	0	Female - Proximal Tubule Urine Flow Rate - GFR (mL/min)	120	Muscle regional blood flow scalar : Male	1	PM Mean	0																							Sigmoidal Male FBirth	0.5
		Abundance : UGT2B28 UM Mean	0	Female - Henle's Loop Urine Flow Rate (mL/min)	43.23	Muscle regional blood flow scalar CV (%) : Male	0	PM CV (%)	0																							Sigmoidal Male AdultMax	1.01
		Abundance : UGT2B28 UM CV (%)	0	Female - Distal Tubule Urine Flow Rate (mL/min)	24.03			UM Mean	0																							Sigmoidal Male Age50	2.72
		Abundance : UGT2B28 IM Mean	0	Female - Collecting Duct Urine Flow Rate (mL/min)	11.56	MPMLA - Upper Arm		UM CV (%)	0																							Sigmoidal Male n	3.43
		Abundance : UGT2B28 IM CV (%)	0	Female - Urine Flow Rate into Bladder (mL/min)	1	Skin surface pH : Male	5.5	IM Mean	0																							Sigmoidal Female FBirth	0.5
		Absolute Abundance : UGT2B28	0	Bypass 1 before Glomerulus (%)	10	Skin surface pH CV (%) : Male	11.1	IM CV (%)	0																							Sigmoidal Female AdultMax	1.01
		Turnover rate : UGT2B28 Mean	1e-06	Bypass 1 before Glomerulus CV (%)	30	Skin temperature °C : Male	32	EM Mean	0																							Sigmoidal Female Age50	2.72
		Turnover rate : UGT2B28 CV (%)	30	Bypass 2 to Henle's Loop & Medu-CD (%)	20	Skin temperature CV (%) : Male	0	EM CV (%)	0																							Sigmoidal Female n	3.43
		Use User UGT Option	Yes	Bypass 2 to Henle's Loop & Medu-CD CV (%)	30	Shape of corneocyte : Male	Cuboid (brick)	PM Mean	0																							Parameter:	Viable Epidermis Thickness
		UGT User	1	PT-S1 ABCB1 (MDR1/P-gp) / 106 PTC (Relative Values)	1	Shape of corneocyte : Female	Cuboid (brick)	PM CV (%)	0																							Sigmoidal Male FBirth	0.64
		Abundance : User UGT1 EM Mean	1	PT-S1 ABCC4 (MRP4) / 106 PTC (Relative Values)	1	Number of SC layers : Male	18	UM Mean	0																							Sigmoidal Male AdultMax	1.04
		Abundance : User UGT1 EM CV (%)	30	PT-S1 SLC22A2 (OCT2) / 106 PTC (Relative Values)	1	Number of SC layers CV (%) : Male	22	UM CV (%)	0																							Sigmoidal Male Age50	14.31
		Abundance : User UGT1 PM Mean	0	PT-S1 SLC22A6 (OAT1) / 106 PTC (Relative Values)	1	Water density gm/cm3 : Male	1	IM Mean	0																							Sigmoidal Male n	4.18
		Abundance : User UGT1 PM CV (%)	0	PT-S1 SLC22A8 (OAT3) / 106 PTC (Relative Values)	1	Water density CV (%) : Male	0	IM CV (%)	0																							Sigmoidal Female FBirth	0.64
		Abundance : User UGT1 UM Mean	0	PT-S1 SLC47As (MATEs) / 106 PTC (Relative Values)	1	SC lipids density gm/cm3 : Male	0.9	FMO1 Absolute Abundance	0																							Sigmoidal Female AdultMax	1.04
		Abundance : User UGT1 UM CV (%)	0	PT-S1 Apical Influx (Kidney) / 106 PTC (Relative Values)	1	SC lipids density CV (%) : Male	0	FMO1 EM Mean	1																							Sigmoidal Female Age50	14.31
		Abundance : User UGT1 IM Mean	0	PT-S1 Basolateral Efflux (Kidney) / 106 PTC (Relative Values)	1	SC proteins density gm/cm3 : Male	1.37	FMO1 EM CV (%)	30																							Sigmoidal Female n	4.18
		Abundance : User UGT1 IM CV (%)	0	PT-S2 ABCB1 (MDR1/P-gp) / 106 PTC (Relative Values)	1	SC proteins density CV (%) : Male	0	FMO1 PM Mean	0																							Parameter:	Total Skin Thickness
		Absolute Abundance : User UGT1	0	PT-S2 ABCC4 (MRP4) / 106 PTC (Relative Values)	1	Intercellular lipid thickness of SC µm : Male	0.091	FMO1 PM CV (%)	0																							Sigmoidal Male FBirth	0.72
		Turnover rate : User UGT1 Mean	1e-06	PT-S2 SLC22A2 (OCT2) / 106 PTC (Relative Values)	1	Intercellular lipid thickness of SC CV (%) : Male	0	FMO1 UM Mean	0																							Sigmoidal Male AdultMax	1.01
		Turnover rate : User UGT1 CV (%)	30	PT-S2 SLC22A6 (OAT1) / 106 PTC (Relative Values)	1	Tortuosity : Male	User Defined	FMO1 UM CV (%)	0																							Sigmoidal Male Age50	16.5
		Use User Cytosolic Enzyme Option	Yes	PT-S2 SLC22A8 (OAT3) / 106 PTC (Relative Values)	1	Tortuosity of lipid diffusion pathway of SC : Male	12.7	FMO1 IM Mean	0																							Sigmoidal Male n	6.09
		User Cyt	1	PT-S2 SLC47As (MATEs) / 106 PTC (Relative Values)	1	Tortuosity of lipid diffusion pathway of SC CV (%) : Male	18	FMO1 IM CV (%)	0																							Sigmoidal Female FBirth	0.72
		Abundance : User Cyt1 EM Mean	1	PT-S2 Apical Influx (Kidney) / 106 PTC (Relative Values)	1	Hair follicle diameter µm : Male	88.8	FMO3 Absolute Abundance	0																							Sigmoidal Female AdultMax	1.01
		Abundance : User Cyt1 EM CV (%)	30	PT-S2 Basolateral Efflux (Kidney) / 106 PTC (Relative Values)	1	Hair follicle diameter CV (%) : Male	33	FMO3 EM Mean	1																							Sigmoidal Female Age50	16.5
		Abundance : User Cyt1 PM Mean	0	PT-S3 ABCB1 (MDR1/P-gp) / 106 PTC (Relative Values)	1	Hair follicle density N/cm2 : Male	32	FMO3 EM CV (%)	30																							Sigmoidal Female n	6.09
		Abundance : User Cyt1 PM CV (%)	0	PT-S3 ABCC4 (MRP4) / 106 PTC (Relative Values)	1	Hair follicle density CV (%) : Male	28	FMO3 PM Mean	0																							Parameter:	Local Subcutaneous Thickness
		Abundance : User Cyt1 UM Mean	0	PT-S3 SLC22A2 (OCT2) / 106 PTC (Relative Values)	1	Hair follicle depth µm : Male	256.7	FMO3 PM CV (%)	0																							Sigmoidal Male FBirth	0.67
		Abundance : User Cyt1 UM CV (%)	0	PT-S3 SLC22A6 (OAT1) / 106 PTC (Relative Values)	1	Hair follicle depth CV (%) : Male	0	FMO3 UM Mean	0																							Sigmoidal Male AdultMax	1.19
		Abundance : User Cyt1 IM Mean	0	PT-S3 SLC22A8 (OAT3) / 106 PTC (Relative Values)	1	Hair shaft diameter µm : Male	16.8	FMO3 UM CV (%)	0																							Sigmoidal Male Age50	16.21
		Abundance : User Cyt1 IM CV (%)	0	PT-S3 SLC47As (MATEs) / 106 PTC (Relative Values)	1	Hair shaft diameter CV (%) : Male	37	FMO3 IM Mean	0																							Sigmoidal Male n	1.6
		Use User Cytosolic Enzyme Option	Yes	PT-S3 Apical Influx (Kidney) / 106 PTC (Relative Values)	1	Sebum viscosity centipose : Male	40	FMO3 IM CV (%)	0																							Sigmoidal Female FBirth	0.37
		User Cyt	2	PT-S3 Basolateral Efflux (Kidney) / 106 PTC (Relative Values)	1	Sebum viscosity CV (%) : Male	0	FMO5 Absolute Abundance	0																							Sigmoidal Female AdultMax	1.38
		Abundance : User Cyt2 EM Mean	1	ABCB1 (P-gp/MDR1) ET Mean	1	Corneocyte pH [top] : Male	6.8	FMO5 EM Mean	1																							Sigmoidal Female Age50	17.3
		Abundance : User Cyt2 EM CV (%)	30	ABCB1 (P-gp/MDR1) ET CV (%)	60	Corneocyte pH [top] CV (%) : Male	6.8	FMO5 EM CV (%)	30																							Sigmoidal Female n	1.83
		Abundance : User Cyt2 PM Mean	0	ABCB1 (P-gp/MDR1) PT Mean	0	Corneocyte thickness [top] µm : Male	0.71	FMO5 PM Mean	0																							Parameter:	Local Muscle Thickness
		Abundance : User Cyt2 PM CV (%)	0	ABCB1 (P-gp/MDR1) PT CV (%)	0	Corneocyte thickness [top] CV (%) : Male	11	FMO5 PM CV (%)	0																							Linear C0	11.8
		Abundance : User Cyt2 UM Mean	0	ABCB1 (P-gp/MDR1) IT Mean	0	Corneocyte width [top] µm : Male	33.2	FMO5 UM Mean	0																							Linear C1	0.18
		Abundance : User Cyt2 UM CV (%)	0	ABCB1 (P-gp/MDR1) IT CV (%)	0	Corneocyte width [top] CV (%) : Male	10.4	FMO5 UM CV (%)	0
		Abundance : User Cyt2 IM Mean	0	ABCB1 (P-gp/MDR1) UT Mean	0	Corneocyte length [top] µm : Male	40.4	FMO5 IM Mean	0																							Site:	UpperArm
		Abundance : User Cyt2 IM CV (%)	0	ABCB1 (P-gp/MDR1) UT CV (%)	0	Corneocyte length [top] CV (%) : Male	6.8	FMO5 IM CV (%)	0																							Parameter:	Skin Surface pH
		Use User Cytosolic Enzyme Option	Yes	ABCC4 (MRP4) ET Mean	1	Hydration level (% water volume) [top] : Male	33.6	FMOUser Absolute Abundance	0																							Exponential C0	1.01
		User Cyt	3	ABCC4 (MRP4) ET CV (%)	60	Hydration level (% water volume) [top] CV (%) : Male	11	FMOUser EM Mean	1																							Exponential C1	0.35
		Abundance : User Cyt3 EM Mean	1	ABCC4 (MRP4) PT Mean	0	SC lipid viscosity [top] centipose : Male	75	FMOUser EM CV (%)	30																							Exponential C2	27.61
		Abundance : User Cyt3 EM CV (%)	30	ABCC4 (MRP4) PT CV (%)	0	SC lipid viscosity [top] CV (%) : Male	0	FMOUser PM Mean	0																							Parameter:	SC Thickness
		Abundance : User Cyt3 PM Mean	0	ABCC4 (MRP4) IT Mean	0	Corneocyte pH [upper mid] : Male	6.8	FMOUser PM CV (%)	0																							Sigmoidal Male FBirth	0.5
		Abundance : User Cyt3 PM CV (%)	0	ABCC4 (MRP4) IT CV (%)	0	Corneocyte pH [upper mid] CV (%) : Male	6.8	FMOUser UM Mean	0																							Sigmoidal Male AdultMax	1.01
		Abundance : User Cyt3 UM Mean	0	ABCC4 (MRP4) UT Mean	0	Corneocyte thickness [upper mid] µm : Male	0.81	FMOUser UM CV (%)	0																							Sigmoidal Male Age50	2.72
		Abundance : User Cyt3 UM CV (%)	0	ABCC4 (MRP4) UT CV (%)	0	Corneocyte thickness [upper mid] CV (%) : Male	11	FMOUser IM Mean	0																							Sigmoidal Male n	3.43
		Abundance : User Cyt3 IM Mean	0	SLC22A2 (OCT2) ET Mean	1	Corneocyte width [upper mid] µm : Male	33.2	FMOUser IM CV (%)	0																							Sigmoidal Female FBirth	0.5
		Abundance : User Cyt3 IM CV (%)	0	SLC22A2 (OCT2) ET CV (%)	60	Corneocyte width [upper mid] CV (%) : Male	10.4	Achlorhydric Coefficient	0																							Sigmoidal Female AdultMax	1.01
		Use User Cytosolic Enzyme Option	Yes	SLC22A2 (OCT2) PT Mean	0	Corneocyte length [upper mid] µm : Male	40.4	Achlorhydric Age Power	0																							Sigmoidal Female Age50	2.72
		User Cyt	4	SLC22A2 (OCT2) PT CV (%)	0	Corneocyte length [upper mid] CV (%) : Male	6.8	Achlorhydric Maximum (%)	0																							Sigmoidal Female n	3.43
		Abundance : User Cyt4 EM Mean	1	SLC22A2 (OCT2) IT Mean	0	Hydration level (% water volume) [upper mid] : Male	44.858	Intestine pH Model	Static																							Parameter:	Viable Epidermis Thickness
		Abundance : User Cyt4 EM CV (%)	30	SLC22A2 (OCT2) IT CV (%)	0	Hydration level (% water volume) [upper mid] CV (%) : Male	7	Stomach pH Fasted	1.5																							Sigmoidal Male FBirth	0.64
		Abundance : User Cyt4 PM Mean	0	SLC22A2 (OCT2) UT Mean	0	SC lipid viscosity [upper mid] centipose : Male	75	Stomach CV pH Fasted (%)	38																							Sigmoidal Male AdultMax	1.04
		Abundance : User Cyt4 PM CV (%)	0	SLC22A2 (OCT2) UT CV (%)	0	SC lipid viscosity [upper mid] CV (%) : Male	0	Stomach pH High Fat Fed initial	4.39																							Sigmoidal Male Age50	14.31
		Abundance : User Cyt4 UM Mean	0	SLC22A6 (OAT1) ET Mean	1	Corneocyte pH [lower mid] : Male	6.8	Stomach CV pH High Fat Fed initial (%)	24																							Sigmoidal Male n	4.18
		Abundance : User Cyt4 UM CV (%)	0	SLC22A6 (OAT1) ET CV (%)	60	Corneocyte pH [lower mid] CV (%) : Male	6.8	k	0.467																							Sigmoidal Female FBirth	0.64
		Abundance : User Cyt4 IM Mean	0	SLC22A6 (OAT1) PT Mean	0	Corneocyte thickness [lower mid] µm : Male	0.93	k CV (%)	97.8																							Sigmoidal Female AdultMax	1.04
		Abundance : User Cyt4 IM CV (%)	0	SLC22A6 (OAT1) PT CV (%)	0	Corneocyte thickness [lower mid] CV (%) : Male	11	Stomach pH Fed initial	5																							Sigmoidal Female Age50	14.31
		Abundance : CES1 EM Mean	1	SLC22A6 (OAT1) IT Mean	0	Corneocyte width [lower mid] µm : Male	33.2	Stomach CV pH Fed initial (%)	25																							Sigmoidal Female n	4.18
		Abundance : CES1 EM CV (%)	46	SLC22A6 (OAT1) IT CV (%)	0	Corneocyte width [lower mid] CV (%) : Male	10.4	Age < 65 Fed Tff (h)	1.8																							Parameter:	Total Skin Thickness
		Abundance : CES1 PM Mean	0.11	SLC22A6 (OAT1) UT Mean	0	Corneocyte length [lower mid] µm : Male	40.4	Age < 65 Fed Tff CV (%)	65																							Sigmoidal Male FBirth	0.72
		Abundance : CES1 PM CV (%)	30	SLC22A6 (OAT1) UT CV (%)	0	Corneocyte length [lower mid] CV (%) : Male	6.8	Age ≥ 65 Fed Tff (h)	3																							Sigmoidal Male AdultMax	1.01
		Abundance : CES1 UM Mean	0	SLC22A8 (OAT3) ET Mean	1	Hydration level (% water volume) [lower mid] : Male	56.0703	Age ≥ 65 Fed Tff CV (%)	80																							Sigmoidal Male Age50	16.5
		Abundance : CES1 UM CV (%)	0	SLC22A8 (OAT3) ET CV (%)	60	Hydration level (% water volume) [lower mid] CV (%) : Male	5	Stomach pH Low Fat Fed initial	5																							Sigmoidal Male n	6.09
		Abundance : CES1 IM Mean	0	SLC22A8 (OAT3) PT Mean	0	SC lipid viscosity [lower mid] centipose : Male	75	Stomach CV pH Low Fat Fed initial (%)	25																							Sigmoidal Female FBirth	0.72
		Abundance : CES1 IM CV (%)	0	SLC22A8 (OAT3) PT CV (%)	0	SC lipid viscosity [lower mid] CV (%) : Male	0	Age < 65 Low Fat Fed Tff (h)	1.8																							Sigmoidal Female AdultMax	1.01
		Abundance : CES2 EM Mean	1	SLC22A8 (OAT3) IT Mean	0	Corneocyte pH [bottom] : Male	6.8	Age < 65 Low Fat Fed Tff CV (%)	0																							Sigmoidal Female Age50	16.5
		Abundance : CES2 EM CV (%)	35	SLC22A8 (OAT3) IT CV (%)	0	Corneocyte pH [bottom] CV (%) : Male	6.8	Age ≥ 65 Low Fat Fed Tff (h)	3																							Sigmoidal Female n	6.09
		Abundance : CES2 PM Mean	0	SLC22A8 (OAT3) UT Mean	0	Corneocyte thickness [bottom] µm : Male	1.04	Age ≥ 65 Low Fat Fed Tff CV (%)	0																							Parameter:	Local Subcutaneous Thickness
		Abundance : CES2 PM CV (%)	0	SLC22A8 (OAT3) UT CV (%)	0	Corneocyte thickness [bottom] CV (%) : Male	11	Stomach Bicarbonate Buffer Concentration Fasted (mM)	7.3																							Sigmoidal Male FBirth	0.67
		Abundance : CES2 UM Mean	0	SLC47As (MATEs) ET Mean	1	Corneocyte width [bottom] µm : Male	33.2	Stomach Bicarbonate Buffer Concentration CV Fasted (%)	30																							Sigmoidal Male AdultMax	1.19
		Abundance : CES2 UM CV (%)	0	SLC47As (MATEs) ET CV (%)	60	Corneocyte width [bottom] CV (%) : Male	10.4	Stomach Bicarbonate Buffer Concentration Fed (mM)	42.46																							Sigmoidal Male Age50	16.21
		Abundance : CES2 IM Mean	0	SLC47As (MATEs) PT Mean	0	Corneocyte length [bottom] µm : Male	40.4	Stomach Bicarbonate Buffer Concentration CV Fed (%)	30																							Sigmoidal Male n	1.6
		Abundance : CES2 IM CV (%)	0	SLC47As (MATEs) PT CV (%)	0	Corneocyte length [bottom] CV (%) : Male	6.8	Stomach Luminal Fluid Velocity Fasted (m/s)	0.032																							Sigmoidal Female FBirth	0.37
		Use User ES Option	Yes	SLC47As (MATEs) IT Mean	0	Hydration level (% water volume) [bottom] : Male	67.3	Stomach Luminal Fluid Velocity CV Fasted (%)	30																							Sigmoidal Female AdultMax	1.38
		Abundance : User ES EM Mean	1	SLC47As (MATEs) IT CV (%)	0	Hydration level (% water volume) [bottom] CV (%) : Male	4	Stomach Luminal Fluid Velocity Fed (m/s)	0.032																							Sigmoidal Female Age50	17.3
		Abundance : User ES EM CV (%)	30	SLC47As (MATEs) UT Mean	0	SC lipid viscosity [bottom] centipose : Male	75	Stomach Luminal Fluid Velocity CV Fed (%)	30																							Sigmoidal Female n	1.83
		Abundance : User ES PM Mean	0	SLC47As (MATEs) UT CV (%)	0	SC lipid viscosity [bottom] CV (%) : Male	0	Stomach Endogenous Ion Hydrochloric Mean (mM)	102																							Parameter:	Local Muscle Thickness
		Abundance : User ES PM CV (%)	0	Apical Influx (Kidney) ET Mean	1	Viable Epidermis thickness µm : Male	51.8	Stomach Endogenous Ion Hydrochloric CV (%)	27.5																							Linear C0	7.7
		Abundance : User ES UM Mean	0	Apical Influx (Kidney) ET CV (%)	60	Viable Epidermis thickness CV (%) : Male	15	Stomach Endogenous Ion Hydrochloric Min (mM)	48																							Linear C1	0.28
		Abundance : User ES UM CV (%)	0	Apical Influx (Kidney) PT Mean	0	Dermis thickness µm : Male	1540	Stomach Endogenous Ion Hydrochloric Max (mM)	173
		Abundance : User ES IM Mean	0	Apical Influx (Kidney) PT CV (%)	0	Dermis thickness CV (%) : Male	29	Stomach Endogenous Ion Sodium Mean (mM)	68																							Site:	FaceCheek
		Abundance : User ES IM CV (%)	0	Apical Influx (Kidney) IT Mean	0	Subcutis thickness mm : Male	8.41	Stomach Endogenous Ion Sodium CV (%)	42.6																							Parameter:	Skin Surface pH
		Abundance : EM Mean	0	Apical Influx (Kidney) IT CV (%)	0	Subcutis thickness CV (%) : Male	39.6	Stomach Endogenous Ion Sodium Min (mM)	19																							Exponential C0	1.01
		Abundance : EM CV (%)	0	Apical Influx (Kidney) UT Mean	0	Muscle thickness mm : Male	28.92	Stomach Endogenous Ion Sodium Max (mM)	122																							Exponential C1	0.2
		Abundance : PM Mean	0	Apical Influx (Kidney) UT CV (%)	0	Muscle thickness CV (%) : Male	15.09	Stomach Endogenous Ion Potassium Mean (mM)	13.4																							Exponential C2	22.13
		Abundance : PM CV (%)	0	Basolateral Efflux (Kidney) ET Mean	1	Dermis regional blood flow scalar : Male	1.2869	Stomach Endogenous Ion Potassium CV (%)	22.4																							Parameter:	SC Thickness
		Abundance : UM Mean	0	Basolateral Efflux (Kidney) ET CV (%)	60	Dermis regional blood flow scalar CV (%) : Male	0	Stomach Endogenous Ion Potassium Min (mM)	8.4																							Sigmoidal Male FBirth	0.5
		Abundance : UM CV (%)	0	Basolateral Efflux (Kidney) PT Mean	0	Subcutis regional blood flow scalar : Male	1	Stomach Endogenous Ion Potassium Max (mM)	19.3																							Sigmoidal Male AdultMax	1.01
		Abundance : IM Mean	0	Basolateral Efflux (Kidney) PT CV (%)	0	Subcutis regional blood flow scalar CV (%) : Male	0	Stomach Endogenous Ion Calcium Mean (mM)	0.6																							Sigmoidal Male Age50	2.72
		Abundance : IM CV (%)	0	Basolateral Efflux (Kidney) IT Mean	0	Muscle regional blood flow scalar : Male	1	Stomach Endogenous Ion Calcium CV (%)	33.3																							Sigmoidal Male n	3.43
		Abundance : EM Mean	0	Basolateral Efflux (Kidney) IT CV (%)	0	Muscle regional blood flow scalar CV (%) : Male	0	Stomach Endogenous Ion Calcium Min (mM)	0.3																							Sigmoidal Female FBirth	0.5
		Abundance : EM CV (%)	0	Basolateral Efflux (Kidney) UT Mean	0			Stomach Endogenous Ion Calcium Max (mM)	1.2																							Sigmoidal Female AdultMax	1.01
		Abundance : PM Mean	0	Basolateral Efflux (Kidney) UT CV (%)	0	MPMLA - Face (cheek)		Stomach Endogenous Ion Generic Cation Mean (mM)	1																							Sigmoidal Female Age50	2.72
		Abundance : PM CV (%)	0			Skin surface pH : Male	4.7	Stomach Endogenous Ion Generic Cation CV (%)	0																							Sigmoidal Female n	3.43
		Abundance : UM Mean	0			Skin surface pH CV (%) : Male	7.2	Stomach Endogenous Ion Generic Cation Min (mM)	0.01																							Parameter:	Viable Epidermis Thickness
		Abundance : UM CV (%)	0			Skin temperature °C : Male	32	Stomach Endogenous Ion Generic Cation Max (mM)	1000																							Sigmoidal Male FBirth	0.64
		Abundance : IM Mean	0			Skin temperature CV (%) : Male	0	Stomach Endogenous Ion Generic Anion Mean (mM)	1																							Sigmoidal Male AdultMax	1.04
		Abundance : IM CV (%)	0			Shape of corneocyte : Male	Cuboid (brick)	Stomach Endogenous Ion Generic Anion CV (%)	0																							Sigmoidal Male Age50	14.31
		Absolute Abundance : FMO1	0			Shape of corneocyte : Female	Cuboid (brick)	Stomach Endogenous Ion Generic Anion Min (mM)	0.01																							Sigmoidal Male n	4.18
		Abundance : FMO1 EM Mean	1			Number of SC layers : Male	13	Stomach Endogenous Ion Generic Anion Max (mM)	1000																							Sigmoidal Female FBirth	0.64
		Abundance : FMO1 EM CV (%)	30			Number of SC layers CV (%) : Male	23	Stomach Fluid Viscosity Fasted (cP)	3																							Sigmoidal Female AdultMax	1.04
		Abundance : FMO1 PM Mean	0			Water density gm/cm3 : Male	1	Stomach Fluid Viscosity CV Fasted (%)	71																							Sigmoidal Female Age50	14.31
		Abundance : FMO1 PM CV (%)	0			Water density CV (%) : Male	0	Stomach Fluid Viscosity Fed (cP)	232																							Sigmoidal Female n	4.18
		Abundance : FMO1 UM Mean	0			SC lipids density gm/cm3 : Male	0.9	Stomach Fluid Viscosity CV Fed (%)	32																							Parameter:	Total Skin Thickness
		Abundance : FMO1 UM CV (%)	0			SC lipids density CV (%) : Male	0	Stomach CMC fasted (mM)	1																							Sigmoidal Male FBirth	0.72
		Abundance : FMO1 IM Mean	0			SC proteins density gm/cm3 : Male	1.37	Stomach CMC fed (mM)	1																							Sigmoidal Male AdultMax	1.01
		Abundance : FMO1 IM CV (%)	0			SC proteins density CV (%) : Male	0	Stomach Bile fasted (mM)	0.34																							Sigmoidal Male Age50	16.5
		Absolute Abundance : FMO3	30			Intercellular lipid thickness of SC µm : Male	0.091	Stomach Bile fasted CV (%)	134																							Sigmoidal Male n	6.09
		Abundance : FMO3 EM Mean	1			Intercellular lipid thickness of SC CV (%) : Male	0	Stomach Bile fed (mM)	0.34																							Sigmoidal Female FBirth	0.72
		Abundance : FMO3 EM CV (%)	50			Tortuosity : Male	User Defined	Stomach Bile fed CV (%)	216.7																							Sigmoidal Female AdultMax	1.01
		Abundance : FMO3 PM Mean	0			Tortuosity of lipid diffusion pathway of SC : Male	12.7	Duodenum Blood Flow (Qvilli %)	8.8																							Sigmoidal Female Age50	16.5
		Abundance : FMO3 PM CV (%)	0			Tortuosity of lipid diffusion pathway of SC CV (%) : Male	18	Duodenum Transit Time (% Total)	4.6																							Sigmoidal Female n	6.09
		Abundance : FMO3 UM Mean	0			Hair follicle diameter µm : Male	65.4	Duodenum CYP3A (% Total)	13.76																							Parameter:	Local Subcutaneous Thickness
		Abundance : FMO3 UM CV (%)	0			Hair follicle diameter CV (%) : Male	83	Duodenum S9PPI (% Total)	14.88																							Sigmoidal Male FBirth	0.67
		Abundance : FMO3 IM Mean	0			Hair follicle density N/cm2 : Male	292	Duodenum MPPI/CYP (% Total)	13.76																							Sigmoidal Male AdultMax	1.19
		Abundance : FMO3 IM CV (%)	0			Hair follicle density CV (%) : Male	16	Duodenum CPPI (% Total)	14.88																							Sigmoidal Male Age50	16.21
		Absolute Abundance : FMO5	25			Hair follicle depth µm : Male	204.8	Duodenum pH High Fat Fed	5.4																							Sigmoidal Male n	1.6
		Abundance : FMO5 EM Mean	1			Hair follicle depth CV (%) : Male	0	Duodenum CV pH High Fat Fed (%)	11																							Sigmoidal Female FBirth	0.37
		Abundance : FMO5 EM CV (%)	55			Hair shaft diameter µm : Male	15.9	Duodenum pH Fed	5.4																							Sigmoidal Female AdultMax	1.38
		Abundance : FMO5 PM Mean	0			Hair shaft diameter CV (%) : Male	57	Duodenum CV pH Fed (%)	11																							Sigmoidal Female Age50	17.3
		Abundance : FMO5 PM CV (%)	0			Sebum viscosity centipose : Male	40	Duodenum pH Low Fat Fed	5.4																							Sigmoidal Female n	1.83
		Abundance : FMO5 UM Mean	0			Sebum viscosity CV (%) : Male	0	Duodenum CV pH Low Fat Fed (%)	11																							Parameter:	Local Muscle Thickness
		Abundance : FMO5 UM CV (%)	0			Corneocyte pH [top] : Male	6.8	Duodenum pH Fasted	6.4																							Linear C0	3.85
		Abundance : FMO5 IM Mean	0			Corneocyte pH [top] CV (%) : Male	6.8	Duodenum CV pH Fasted (%)	16																							Linear C1	0.14
		Abundance : FMO5 IM CV (%)	0			Corneocyte thickness [top] µm : Male	0.47	Duodenum Bicarbonate Buffer Concentration Fasted (mM)	6.53
		Absolute Abundance : FMOUser	0			Corneocyte thickness [top] CV (%) : Male	4	Duodenum Bicarbonate Buffer Concentration CV Fasted (%)	30																							Site:	LegLower
		Abundance : FMOUser EM Mean	1			Corneocyte width [top] µm : Male	27.7	Duodenum Bicarbonate Buffer Concentration Fed (mM)	34.19																							Parameter:	Skin Surface pH
		Abundance : FMOUser EM CV (%)	30			Corneocyte width [top] CV (%) : Male	9.2	Duodenum Bicarbonate Buffer Concentration CV Fed (%)	30																							Exponential C0	1.01
		Abundance : FMOUser PM Mean	0			Corneocyte length [top] µm : Male	34.2	Duodenum Luminal Fluid Velocity Fasted (m/s)	0.005																							Exponential C1	0.35
		Abundance : FMOUser PM CV (%)	0			Corneocyte length [top] CV (%) : Male	4.1	Duodenum Luminal Fluid Velocity CV Fasted (%)	30																							Exponential C2	27.61
		Abundance : FMOUser UM Mean	0			Hydration level (% water volume) [top] : Male	35.5	Duodenum Luminal Fluid Velocity Fed (m/s)	0.005																							Parameter:	SC Thickness
		Abundance : FMOUser UM CV (%)	0			Hydration level (% water volume) [top] CV (%) : Male	17	Duodenum Luminal Fluid Velocity CV Fed (%)	30																							Sigmoidal Male FBirth	0.5
		Abundance : FMOUser IM Mean	0			SC lipid viscosity [top] centipose : Male	75	Duodenum Endogenous Ion Hydrochloric Mean (mM)	102.4																							Sigmoidal Male AdultMax	1.01
		Abundance : FMOUser IM CV (%)	0			SC lipid viscosity [top] CV (%) : Male	0	Duodenum Endogenous Ion Hydrochloric CV (%)	15.1																							Sigmoidal Male Age50	2.72
		CV for non P450 Clearance	30			Corneocyte pH [upper mid] : Male	6.8	Duodenum Endogenous Ion Hydrochloric Min (mM)	64.6																							Sigmoidal Male n	3.43
		Absolute Abundance : ABCB1 (P-gp/MDR1) (pmol/10^6 hepatocytes)	0.246			Corneocyte pH [upper mid] CV (%) : Male	6.8	Duodenum Endogenous Ion Hydrochloric Max (mM)	158.8																							Sigmoidal Female FBirth	0.5
		Abundance : ABCB1 (P-gp/MDR1) ET Mean	1			Corneocyte thickness [upper mid] µm : Male	0.53	Duodenum Endogenous Ion Sodium Mean (mM)	118.4																							Sigmoidal Female AdultMax	1.01
		Abundance : ABCB1 (P-gp/MDR1) ET CV (%)	59			Corneocyte thickness [upper mid] CV (%) : Male	4	Duodenum Endogenous Ion Sodium CV (%)	9.2																							Sigmoidal Female Age50	2.72
		Abundance : ABCB1 (P-gp/MDR1) PT Mean	0			Corneocyte width [upper mid] µm : Male	27.7	Duodenum Endogenous Ion Sodium Min (mM)	89.6																							Sigmoidal Female n	3.43
		Abundance : ABCB1 (P-gp/MDR1) PT CV (%)	0			Corneocyte width [upper mid] CV (%) : Male	9.2	Duodenum Endogenous Ion Sodium Max (mM)	155.1																							Parameter:	Viable Epidermis Thickness
		Abundance : ABCB1 (P-gp/MDR1) IT Mean	0			Corneocyte length [upper mid] µm : Male	34.2	Duodenum Endogenous Ion Potassium Mean (mM)	11.2																							Sigmoidal Male FBirth	0.64
		Abundance : ABCB1 (P-gp/MDR1) IT CV (%)	0			Corneocyte length [upper mid] CV (%) : Male	4.1	Duodenum Endogenous Ion Potassium CV (%)	38.9																							Sigmoidal Male AdultMax	1.04
		Abundance : ABCB1 (P-gp/MDR1) UT Mean	0			Hydration level (% water volume) [upper mid] : Male	46.1	Duodenum Endogenous Ion Potassium Min (mM)	3.4																							Sigmoidal Male Age50	14.31
		Abundance : ABCB1 (P-gp/MDR1) UT CV (%)	0			Hydration level (% water volume) [upper mid] CV (%) : Male	11	Duodenum Endogenous Ion Potassium Max (mM)	32.1																							Sigmoidal Male n	4.18
		Absolute Abundance : ABCB11 (BSEP) (pmol/10^6 hepatocytes)	1			SC lipid viscosity [upper mid] centipose : Male	75	Duodenum Endogenous Ion Calcium Mean (mM)	0.5																							Sigmoidal Female FBirth	0.64
		Abundance : ABCB11 (BSEP) ET Mean	1			SC lipid viscosity [upper mid] CV (%) : Male	0	Duodenum Endogenous Ion Calcium CV (%)	60																							Sigmoidal Female AdultMax	1.04
		Abundance : ABCB11 (BSEP) ET CV (%)	131			Corneocyte pH [lower mid] : Male	6.8	Duodenum Endogenous Ion Calcium Min (mM)	0.1																							Sigmoidal Female Age50	14.31
		Abundance : ABCB11 (BSEP) PT Mean	0			Corneocyte pH [lower mid] CV (%) : Male	6.8	Duodenum Endogenous Ion Calcium Max (mM)	1.3																							Sigmoidal Female n	4.18
		Abundance : ABCB11 (BSEP) PT CV (%)	0			Corneocyte thickness [lower mid] µm : Male	0.6	Duodenum Endogenous Ion Generic Cation Mean (mM)	1																							Parameter:	Total Skin Thickness
		Abundance : ABCB11 (BSEP) IT Mean	0			Corneocyte thickness [lower mid] CV (%) : Male	4	Duodenum Endogenous Ion Generic Cation CV (%)	0																							Sigmoidal Male FBirth	0.72
		Abundance : ABCB11 (BSEP) IT CV (%)	0			Corneocyte width [lower mid] µm : Male	27.7	Duodenum Endogenous Ion Generic Cation Min (mM)	0.01																							Sigmoidal Male AdultMax	1.01
		Abundance : ABCB11 (BSEP) UT Mean	0			Corneocyte width [lower mid] CV (%) : Male	9.2	Duodenum Endogenous Ion Generic Cation Max (mM)	1000																							Sigmoidal Male Age50	16.5
		Abundance : ABCB11 (BSEP) UT CV (%)	0			Corneocyte length [lower mid] µm : Male	34.2	Duodenum Endogenous Ion Generic Anion Mean (mM)	1																							Sigmoidal Male n	6.09
		Absolute Abundance : ABCC2 (MRP2) (pmol/10^6 hepatocytes)	0.59			Corneocyte length [lower mid] CV (%) : Male	4.1	Duodenum Endogenous Ion Generic Anion CV (%)	0																							Sigmoidal Female FBirth	0.72
		Abundance : ABCC2 (MRP2) ET Mean	1			Hydration level (% water volume) [lower mid] : Male	56.75	Duodenum Endogenous Ion Generic Anion Min (mM)	0.01																							Sigmoidal Female AdultMax	1.01
		Abundance : ABCC2 (MRP2) ET CV (%)	88			Hydration level (% water volume) [lower mid] CV (%) : Male	7	Duodenum Endogenous Ion Generic Anion Max (mM)	1000																							Sigmoidal Female Age50	16.5
		Abundance : ABCC2 (MRP2) PT Mean	0			SC lipid viscosity [lower mid] centipose : Male	75	Duodenum Fluid Viscosity Fasted (cP)	3																							Sigmoidal Female n	6.09
		Abundance : ABCC2 (MRP2) PT CV (%)	0			SC lipid viscosity [lower mid] CV (%) : Male	0	Duodenum Fluid Viscosity CV Fasted (%)	71																							Parameter:	Local Subcutaneous Thickness
		Abundance : ABCC2 (MRP2) IT Mean	0			Corneocyte pH [bottom] : Male	6.8	Duodenum Fluid Viscosity Fed (cP)	65																							Sigmoidal Male FBirth	0.67
		Abundance : ABCC2 (MRP2) IT CV (%)	0			Corneocyte pH [bottom] CV (%) : Male	6.8	Duodenum Fluid Viscosity CV Fed (%)	27																							Sigmoidal Male AdultMax	1.19
		Abundance : ABCC2 (MRP2) UT Mean	0			Corneocyte thickness [bottom] µm : Male	0.68	Duodenum CMC fasted (mM)	1																							Sigmoidal Male Age50	16.21
		Abundance : ABCC2 (MRP2) UT CV (%)	0			Corneocyte thickness [bottom] CV (%) : Male	4	Duodenum CMC fed (mM)	1																							Sigmoidal Male n	1.6
		Absolute Abundance : ABCC3 (MRP3) (pmol/10^6 hepatocytes)	0.239			Corneocyte width [bottom] µm : Male	27.7	Duodenum Bile fasted (mM)	3.31																							Sigmoidal Female FBirth	0.37
		Abundance : ABCC3 (MRP3) ET Mean	1			Corneocyte width [bottom] CV (%) : Male	9.2	Duodenum Bile fasted CV (%)	97																							Sigmoidal Female AdultMax	1.38
		Abundance : ABCC3 (MRP3) ET CV (%)	65			Corneocyte length [bottom] µm : Male	34.2	Duodenum Bile fed (mM)	8.74																							Sigmoidal Female Age50	17.3
		Abundance : ABCC3 (MRP3) PT Mean	0			Corneocyte length [bottom] CV (%) : Male	4.1	Duodenum Bile fed CV (%)	79																							Sigmoidal Female n	1.83
		Abundance : ABCC3 (MRP3) PT CV (%)	0			Hydration level (% water volume) [bottom] : Male	67.4	Duodenum Channel Depth Mean (µm)	522.78																							Parameter:	Local Muscle Thickness
		Abundance : ABCC3 (MRP3) IT Mean	0			Hydration level (% water volume) [bottom] CV (%) : Male	4	Duodenum Channel Depth CV (%)	32.72																							Linear C0	8.1
		Abundance : ABCC3 (MRP3) IT CV (%)	0			SC lipid viscosity [bottom] centipose : Male	75	Duodenum Channel Width Mean (µm)	28.03																							Linear C1	0.19
		Abundance : ABCC3 (MRP3) UT Mean	0			SC lipid viscosity [bottom] CV (%) : Male	0	Duodenum Channel Width CV (%)	28.69
		Abundance : ABCC3 (MRP3) UT CV (%)	0			Viable Epidermis thickness µm : Male	46.8667	Duodenum Mean Thickness Mean (µm)	128.35																							Site:	LegUpper
		Absolute Abundance : ABCC4 (MRP4) (pmol/10^6 hepatocytes)	0			Viable Epidermis thickness CV (%) : Male	24	Duodenum Mean Thickness CV (%)	8.1																							Parameter:	Skin Surface pH
		Abundance : ABCC4 (MRP4) ET Mean	1			Dermis thickness µm : Male	1580	Duodenum Fold Expansion Mean	1																							Exponential C0	1.01
		Abundance : ABCC4 (MRP4) ET CV (%)	60			Dermis thickness CV (%) : Male	20	Duodenum Fold Expansion CV (%)	0																							Exponential C1	0.35
		Abundance : ABCC4 (MRP4) PT Mean	0			Subcutis thickness mm : Male	1.91	Duodenum Pore Radius Mean	8.6																							Exponential C2	27.61
		Abundance : ABCC4 (MRP4) PT CV (%)	0			Subcutis thickness CV (%) : Male	55.7	Duodenum Pore Radius CV (%)	0																							Parameter:	SC Thickness
		Abundance : ABCC4 (MRP4) IT Mean	0			Muscle thickness mm : Male	13.2	Duodenum Unstirred Layer Thickness Mean (µm)	170																							Sigmoidal Male FBirth	0.5
		Abundance : ABCC4 (MRP4) IT CV (%)	0			Muscle thickness CV (%) : Male	18	Duodenum Unstirred Layer Thickness CV (%)	22.35																							Sigmoidal Male AdultMax	1.01
		Abundance : ABCC4 (MRP4) UT Mean	0			Dermis regional blood flow scalar : Male	2.12619	Duodenum Unstirred Layer pH	6.5																							Sigmoidal Male Age50	2.72
		Abundance : ABCC4 (MRP4) UT CV (%)	0			Dermis regional blood flow scalar CV (%) : Male	0	Duodenum Unstirred Layer CV (%)	0.5																							Sigmoidal Male n	3.43
		Absolute Abundance : ABCC6 (MRP6) (pmol/10^6 hepatocytes)	0.214			Subcutis regional blood flow scalar : Male	1	Duodenum ABCB1 (P-gp/MDR1) (Relative values)	0.51																							Sigmoidal Female FBirth	0.5
		Abundance : ABCC6 (MRP6) ET Mean	1			Subcutis regional blood flow scalar CV (%) : Male	0	Duodenum ABCC1 (MRP1) (Relative values)	0.45																							Sigmoidal Female AdultMax	1.01
		Abundance : ABCC6 (MRP6) ET CV (%)	46			Muscle regional blood flow scalar : Male	1	Duodenum ABCC2 (MRP2) (Relative values)	1.41																							Sigmoidal Female Age50	2.72
		Abundance : ABCC6 (MRP6) PT Mean	0			Muscle regional blood flow scalar CV (%) : Male	0	Duodenum ABCC3 (MRP3) (Relative values)	2.15																							Sigmoidal Female n	3.43
		Abundance : ABCC6 (MRP6) PT CV (%)	0					Duodenum ABCC4 (MRP4) (Relative values)	1.02																							Parameter:	Viable Epidermis Thickness
		Abundance : ABCC6 (MRP6) IT Mean	0			MPMLA - Lower Leg		Duodenum ABCG2 (BCRP) (Relative values)	0.68																							Sigmoidal Male FBirth	0.64
		Abundance : ABCC6 (MRP6) IT CV (%)	0			Skin surface pH : Male	5.5	Duodenum SLC2A2 (GLUT2) (Relative values)	1																							Sigmoidal Male AdultMax	1.04
		Abundance : ABCC6 (MRP6) UT Mean	0			Skin surface pH CV (%) : Male	11	Duodenum SLC10A2 (ASBT/IBAT) (Relative values)	16.49																							Sigmoidal Male Age50	14.31
		Abundance : ABCC6 (MRP6) UT CV (%)	0			Skin temperature °C : Male	32	Duodenum SLC15A1 (PEPT1) (Relative values)	0.94																							Sigmoidal Male n	4.18
		Absolute Abundance : ABCG2 (BCRP) (pmol/10^6 hepatocytes)	0.103			Skin temperature CV (%) : Male	0	Duodenum SLC16A1 (MCT1) (Relative values)	1.25																							Sigmoidal Female FBirth	0.64
		Abundance : ABCG2 (BCRP) ET Mean	1			Shape of corneocyte : Male	Cuboid (brick)	Duodenum SLCO2B1 (OATP2B1) (Relative values)	0.73																							Sigmoidal Female AdultMax	1.04
		Abundance : ABCG2 (BCRP) ET CV (%)	30			Shape of corneocyte : Female	Cuboid (brick)	Duodenum SLCO4C1 (OATP4C1) (Relative values)	1																							Sigmoidal Female Age50	14.31
		Abundance : ABCG2 (BCRP) PT Mean	0.37			Number of SC layers : Male	22	Duodenum SLC22A1 (OCT1) (Relative values)	1.03																							Sigmoidal Female n	4.18
		Abundance : ABCG2 (BCRP) PT CV (%)	30			Number of SC layers CV (%) : Male	6	Duodenum SLC22A3 (OCT3) (Relative values)	1.19																							Parameter:	Total Skin Thickness
		Abundance : ABCG2 (BCRP) IT Mean	0.67			Water density gm/cm3 : Male	1	Duodenum SLC22A4 (OCTN1) (Relative values)	0.46																							Sigmoidal Male FBirth	0.72
		Abundance : ABCG2 (BCRP) IT CV (%)	30			Water density CV (%) : Male	0	Duodenum SLC51A/B (OST-α/β) (Relative values)	0.56																							Sigmoidal Male AdultMax	1.01
		Abundance : ABCG2 (BCRP) UT Mean	0			SC lipids density gm/cm3 : Male	0.9	Duodenum Apical Influx (Intestine) (Relative values)	1																							Sigmoidal Male Age50	16.5
		Abundance : ABCG2 (BCRP) UT CV (%)	0			SC lipids density CV (%) : Male	0	Duodenum Apical Efflux (Intestine) (Relative values)	1																							Sigmoidal Male n	6.09
		Absolute Abundance : SLC10A1 (NTCP) (pmol/10^6 hepatocytes)	0.647			SC proteins density gm/cm3 : Male	1.37	Duodenum Basolateral Influx (Intestine) (Relative values)	1																							Sigmoidal Female FBirth	0.72
		Abundance : SLC10A1 (NTCP) ET Mean	1			SC proteins density CV (%) : Male	0	Duodenum Basolateral Efflux (Intestine) (Relative values)	1																							Sigmoidal Female AdultMax	1.01
		Abundance : SLC10A1 (NTCP) ET CV (%)	50			Intercellular lipid thickness of SC µm : Male	0.091	Jejunum I Blood Flow (Qvilli %)	24.2																							Sigmoidal Female Age50	16.5
		Abundance : SLC10A1 (NTCP) PT Mean	0			Intercellular lipid thickness of SC CV (%) : Male	0	Jejunum I Transit Time (% Total)	17.3																							Sigmoidal Female n	6.09
		Abundance : SLC10A1 (NTCP) PT CV (%)	0			Tortuosity : Male	User Defined	Jejunum I CYP3A (% Total)	27.24																							Parameter:	Local Subcutaneous Thickness
		Abundance : SLC10A1 (NTCP) IT Mean	0			Tortuosity of lipid diffusion pathway of SC : Male	12.7	Jejunum I S9PPI (% Total)	26.9																							Sigmoidal Male FBirth	0.67
		Abundance : SLC10A1 (NTCP) IT CV (%)	0			Tortuosity of lipid diffusion pathway of SC CV (%) : Male	18	Jejunum I MPPI/CYP (% Total)	27.24																							Sigmoidal Male AdultMax	1.19
		Abundance : SLC10A1 (NTCP) UT Mean	0			Hair follicle diameter µm : Male	168.4	Jejunum I CPPI (% Total)	26.9																							Sigmoidal Male Age50	16.21
		Abundance : SLC10A1 (NTCP) UT CV (%)	0			Hair follicle diameter CV (%) : Male	26	Jejunum I pH High Fat Fed	6.5																							Sigmoidal Male n	1.6
		Absolute Abundance : SLC16A1 (MCT1) (pmol/10^6 hepatocytes)	0.638			Hair follicle density N/cm2 : Male	14	Jejunum I CV pH High Fat Fed (%)	13																							Sigmoidal Female FBirth	0.37
		Abundance : SLC16A1 (MCT1) ET Mean	1			Hair follicle density CV (%) : Male	50	Jejunum I pH Fed	6.5																							Sigmoidal Female AdultMax	1.38
		Abundance : SLC16A1 (MCT1) ET CV (%)	60			Hair follicle depth µm : Male	613.5	Jejunum I CV pH Fed (%)	13																							Sigmoidal Female Age50	17.3
		Abundance : SLC16A1 (MCT1) PT Mean	0			Hair follicle depth CV (%) : Male	0	Jejunum I pH Low Fat Fed	6.5																							Sigmoidal Female n	1.83
		Abundance : SLC16A1 (MCT1) PT CV (%)	0			Hair shaft diameter µm : Male	42.1	Jejunum I CV pH Low Fat Fed (%)	13																							Parameter:	Local Muscle Thickness
		Abundance : SLC16A1 (MCT1) IT Mean	0			Hair shaft diameter CV (%) : Male	29	Jejunum I pH Fasted	6.5																							Linear C0	16.3
		Abundance : SLC16A1 (MCT1) IT CV (%)	0			Sebum viscosity centipose : Male	40	Jejunum I CV pH Fasted (%)	13																							Linear C1	0.42
		Abundance : SLC16A1 (MCT1) UT Mean	0			Sebum viscosity CV (%) : Male	0	Jejunum I Bicarbonate Buffer Concentration Fasted (mM)	9.94
		Abundance : SLC16A1 (MCT1) UT CV (%)	0			Corneocyte pH [top] : Male	6.8	Jejunum I Bicarbonate Buffer Concentration CV Fasted (%)	30																							Site:	Back
		Absolute Abundance : SLCO1B1 (OATP1B1) (pmol/10^6 hepatocytes)	3.1			Corneocyte pH [top] CV (%) : Male	6.8	Jejunum I Bicarbonate Buffer Concentration Fed (mM)	17.34																							Parameter:	Skin Surface pH
		Abundance : SLCO1B1 (OATP1B1) ET Mean	1			Corneocyte thickness [top] µm : Male	0.87	Jejunum I Bicarbonate Buffer Concentration CV Fed (%)	30																							Exponential C0	1.01
		Abundance : SLCO1B1 (OATP1B1) ET CV (%)	73			Corneocyte thickness [top] CV (%) : Male	9	Jejunum I Luminal Fluid Velocity Fasted (m/s)	0.0013																							Exponential C1	0.35
		Abundance : SLCO1B1 (OATP1B1) PT Mean	0.37			Corneocyte width [top] µm : Male	29.6	Jejunum I Luminal Fluid Velocity CV Fasted (%)	56																							Exponential C2	27.61
		Abundance : SLCO1B1 (OATP1B1) PT CV (%)	30			Corneocyte width [top] CV (%) : Male	5.9	Jejunum I Luminal Fluid Velocity Fed (m/s)	0.0013																							Parameter:	SC Thickness
		Abundance : SLCO1B1 (OATP1B1) IT Mean	0.68			Corneocyte length [top] µm : Male	36.4	Jejunum I Luminal Fluid Velocity CV Fed (%)	56																							Sigmoidal Male FBirth	0.5
		Abundance : SLCO1B1 (OATP1B1) IT CV (%)	52			Corneocyte length [top] CV (%) : Male	5.7	Jejunum I Endogenous Ion Hydrochloric Mean (mM)	126																							Sigmoidal Male AdultMax	1.01
		Abundance : SLCO1B1 (OATP1B1) UT Mean	1.39			Hydration level (% water volume) [top] : Male	33.9	Jejunum I Endogenous Ion Hydrochloric CV (%)	15.1																							Sigmoidal Male Age50	2.72
		Abundance : SLCO1B1 (OATP1B1) UT CV (%)	62			Hydration level (% water volume) [top] CV (%) : Male	9	Jejunum I Endogenous Ion Hydrochloric Min (mM)	92																							Sigmoidal Male n	3.43
		Absolute Abundance : SLCO1B3 (OATP1B3) (pmol/10^6 hepatocytes)	3.08			SC lipid viscosity [top] centipose : Male	75	Jejunum I Endogenous Ion Hydrochloric Max (mM)	181																							Sigmoidal Female FBirth	0.5
		Abundance : SLCO1B3 (OATP1B3) ET Mean	1			SC lipid viscosity [top] CV (%) : Male	0	Jejunum I Endogenous Ion Sodium Mean (mM)	142																							Sigmoidal Female AdultMax	1.01
		Abundance : SLCO1B3 (OATP1B3) ET CV (%)	89			Corneocyte pH [upper mid] : Male	6.8	Jejunum I Endogenous Ion Sodium CV (%)	9.2																							Sigmoidal Female Age50	2.72
		Abundance : SLCO1B3 (OATP1B3) PT Mean	0			Corneocyte pH [upper mid] CV (%) : Male	6.8	Jejunum I Endogenous Ion Sodium Min (mM)	111																							Sigmoidal Female n	3.43
		Abundance : SLCO1B3 (OATP1B3) PT CV (%)	0			Corneocyte thickness [upper mid] µm : Male	0.99	Jejunum I Endogenous Ion Sodium Max (mM)	165																							Parameter:	Viable Epidermis Thickness
		Abundance : SLCO1B3 (OATP1B3) IT Mean	0			Corneocyte thickness [upper mid] CV (%) : Male	9	Jejunum I Endogenous Ion Potassium Mean (mM)	5.4																							Sigmoidal Male FBirth	0.64
		Abundance : SLCO1B3 (OATP1B3) IT CV (%)	0			Corneocyte width [upper mid] µm : Male	29.6	Jejunum I Endogenous Ion Potassium CV (%)	38.9																							Sigmoidal Male AdultMax	1.04
		Abundance : SLCO1B3 (OATP1B3) UT Mean	0			Corneocyte width [upper mid] CV (%) : Male	5.9	Jejunum I Endogenous Ion Potassium Min (mM)	1.7																							Sigmoidal Male Age50	14.31
		Abundance : SLCO1B3 (OATP1B3) UT CV (%)	0			Corneocyte length [upper mid] µm : Male	36.4	Jejunum I Endogenous Ion Potassium Max (mM)	11.6																							Sigmoidal Male n	4.18
		Absolute Abundance : SLCO2B1 (OATP2B1) (pmol/10^6 hepatocytes)	1.18			Corneocyte length [upper mid] CV (%) : Male	5.7	Jejunum I Endogenous Ion Calcium Mean (mM)	0.5																							Sigmoidal Female FBirth	0.64
		Abundance : SLCO2B1 (OATP2B1) ET Mean	1			Hydration level (% water volume) [upper mid] : Male	44.6987	Jejunum I Endogenous Ion Calcium CV (%)	60																							Sigmoidal Female AdultMax	1.04
		Abundance : SLCO2B1 (OATP2B1) ET CV (%)	62			Hydration level (% water volume) [upper mid] CV (%) : Male	6	Jejunum I Endogenous Ion Calcium Min (mM)	0.1																							Sigmoidal Female Age50	14.31
		Abundance : SLCO2B1 (OATP2B1) PT Mean	0			SC lipid viscosity [upper mid] centipose : Male	75	Jejunum I Endogenous Ion Calcium Max (mM)	1.3																							Sigmoidal Female n	4.18
		Abundance : SLCO2B1 (OATP2B1) PT CV (%)	0			SC lipid viscosity [upper mid] CV (%) : Male	0	Jejunum I Endogenous Ion Generic Cation Mean (mM)	1																							Parameter:	Total Skin Thickness
		Abundance : SLCO2B1 (OATP2B1) IT Mean	0			Corneocyte pH [lower mid] : Male	6.8	Jejunum I Endogenous Ion Generic Cation CV (%)	0																							Sigmoidal Male FBirth	0.72
		Abundance : SLCO2B1 (OATP2B1) IT CV (%)	0			Corneocyte pH [lower mid] CV (%) : Male	6.8	Jejunum I Endogenous Ion Generic Cation Min (mM)	0.01																							Sigmoidal Male AdultMax	1.01
		Abundance : SLCO2B1 (OATP2B1) UT Mean	0			Corneocyte thickness [lower mid] µm : Male	1.13	Jejunum I Endogenous Ion Generic Cation Max (mM)	1000																							Sigmoidal Male Age50	16.5
		Abundance : SLCO2B1 (OATP2B1) UT CV (%)	0			Corneocyte thickness [lower mid] CV (%) : Male	9	Jejunum I Endogenous Ion Generic Anion Mean (mM)	1																							Sigmoidal Male n	6.09
		Absolute Abundance : SLC22A1 (OCT1) (pmol/10^6 hepatocytes)	1.27			Corneocyte width [lower mid] µm : Male	29.6	Jejunum I Endogenous Ion Generic Anion CV (%)	0																							Sigmoidal Female FBirth	0.72
		Abundance : SLC22A1 (OCT1) ET Mean	1			Corneocyte width [lower mid] CV (%) : Male	5.9	Jejunum I Endogenous Ion Generic Anion Min (mM)	0.01																							Sigmoidal Female AdultMax	1.01
		Abundance : SLC22A1 (OCT1) ET CV (%)	44			Corneocyte length [lower mid] µm : Male	36.4	Jejunum I Endogenous Ion Generic Anion Max (mM)	1000																							Sigmoidal Female Age50	16.5
		Abundance : SLC22A1 (OCT1) PT Mean	0.01			Corneocyte length [lower mid] CV (%) : Male	5.7	Jejunum I Fluid Viscosity Fasted (cP)	3																							Sigmoidal Female n	6.09
		Abundance : SLC22A1 (OCT1) PT CV (%)	44			Hydration level (% water volume) [lower mid] : Male	55.5388	Jejunum I Fluid Viscosity CV Fasted (%)	71																							Parameter:	Local Subcutaneous Thickness
		Abundance : SLC22A1 (OCT1) IT Mean	0.62			Hydration level (% water volume) [lower mid] CV (%) : Male	5	Jejunum I Fluid Viscosity Fed (cP)	33																							Sigmoidal Male FBirth	0.67
		Abundance : SLC22A1 (OCT1) IT CV (%)	44			SC lipid viscosity [lower mid] centipose : Male	75	Jejunum I Fluid Viscosity CV Fed (%)	36																							Sigmoidal Male AdultMax	1.19
		Abundance : SLC22A1 (OCT1) UT Mean	1.14			SC lipid viscosity [lower mid] CV (%) : Male	0	Jejunum I CMC fasted (mM)	1																							Sigmoidal Male Age50	16.21
		Abundance : SLC22A1 (OCT1) UT CV (%)	44			Corneocyte pH [bottom] : Male	6.8	Jejunum I CMC fed (mM)	1																							Sigmoidal Male n	1.6
		Absolute Abundance : SLC22A7 (OAT2) (pmol/10^6 hepatocytes)	1.25			Corneocyte pH [bottom] CV (%) : Male	6.8	Jejunum I Bile fasted (mM)	2.3																							Sigmoidal Female FBirth	0.37
		Abundance : SLC22A7 (OAT2) ET Mean	1			Corneocyte thickness [bottom] µm : Male	1.27	Jejunum I Bile fasted CV (%)	100																							Sigmoidal Female AdultMax	1.38
		Abundance : SLC22A7 (OAT2) ET CV (%)	75			Corneocyte thickness [bottom] CV (%) : Male	9	Jejunum I Bile fed (mM)	10.03																							Sigmoidal Female Age50	17.3
		Abundance : SLC22A7 (OAT2) PT Mean	0			Corneocyte width [bottom] µm : Male	29.6	Jejunum I Bile fed CV (%)	73																							Sigmoidal Female n	1.83
		Abundance : SLC22A7 (OAT2) PT CV (%)	0			Corneocyte width [bottom] CV (%) : Male	5.9	Jejunum I Channel Depth Mean (µm)	448.81																							Parameter:	Local Muscle Thickness
		Abundance : SLC22A7 (OAT2) IT Mean	0			Corneocyte length [bottom] µm : Male	36.4	Jejunum I Channel Depth CV (%)	21.82																							Linear C0	8.1
		Abundance : SLC22A7 (OAT2) IT CV (%)	0			Corneocyte length [bottom] CV (%) : Male	5.7	Jejunum I Channel Width Mean (µm)	22.44																							Linear C1	0.19
		Abundance : SLC22A7 (OAT2) UT Mean	0			Hydration level (% water volume) [bottom] : Male	66.4	Jejunum I Channel Width CV (%)	31.68
		Abundance : SLC22A7 (OAT2) UT CV (%)	0			Hydration level (% water volume) [bottom] CV (%) : Male	4	Jejunum I Mean Thickness Mean (µm)	137.7																							Site:	PhysiologyB
		Absolute Abundance : SLC22A9 (OAT7) (pmol/10^6 hepatocytes)	1.45			SC lipid viscosity [bottom] centipose : Male	75	Jejunum I Mean Thickness CV (%)	14.42																							Parameter:	Skin Surface pH
		Abundance : SLC22A9 (OAT7) ET Mean	1			SC lipid viscosity [bottom] CV (%) : Male	0	Jejunum I Fold Expansion Mean	1.97																							Sigmoidal Male FBirth	0
		Abundance : SLC22A9 (OAT7) ET CV (%)	51			Viable Epidermis thickness µm : Male	57.36	Jejunum I Fold Expansion CV (%)	24.54																							Sigmoidal Male AdultMax	0
		Abundance : SLC22A9 (OAT7) PT Mean	0			Viable Epidermis thickness CV (%) : Male	8	Jejunum I Pore Radius Mean	8.6																							Sigmoidal Male Age50	0
		Abundance : SLC22A9 (OAT7) PT CV (%)	0			Dermis thickness µm : Male	1240	Jejunum I Pore Radius CV (%)	0																							Sigmoidal Male n	0
		Abundance : SLC22A9 (OAT7) IT Mean	0			Dermis thickness CV (%) : Male	20	Jejunum I Unstirred Layer Thickness Mean (µm)	123																							Sigmoidal Female FBirth	0
		Abundance : SLC22A9 (OAT7) IT CV (%)	0			Subcutis thickness mm : Male	9.62	Jejunum I Unstirred Layer Thickness CV (%)	3																							Sigmoidal Female AdultMax	0
		Abundance : SLC22A9 (OAT7) UT Mean	0			Subcutis thickness CV (%) : Male	48.3	Jejunum I Unstirred Layer pH	6.5																							Sigmoidal Female Age50	0
		Abundance : SLC22A9 (OAT7) UT CV (%)	0			Muscle thickness mm : Male	17.7	Jejunum I Unstirred Layer CV (%)	0.5																							Sigmoidal Female n	0
		Absolute Abundance : SLC29A1 (ENT1) (pmol/10^6 hepatocytes)	0.0646			Muscle thickness CV (%) : Male	22.67	Jejunum I ABCB1 (P-gp/MDR1) (pmol/mg total membrane protein)	0.4																							Parameter:	SC Thickness
		Abundance : SLC29A1 (ENT1) ET Mean	1			Dermis regional blood flow scalar : Male	0.839286	Jejunum I ABCC1 (MRP1) (pmol/mg total membrane protein)	0																							Sigmoidal Male FBirth	0
		Abundance : SLC29A1 (ENT1) ET CV (%)	49			Dermis regional blood flow scalar CV (%) : Male	0	Jejunum I ABCC2 (MRP2) (pmol/mg total membrane protein)	0.86																							Sigmoidal Male AdultMax	0
		Abundance : SLC29A1 (ENT1) PT Mean	0			Subcutis regional blood flow scalar : Male	1	Jejunum I ABCC3 (MRP3) (pmol/mg total membrane protein)	0.58																							Sigmoidal Male Age50	0
		Abundance : SLC29A1 (ENT1) PT CV (%)	0			Subcutis regional blood flow scalar CV (%) : Male	0	Jejunum I ABCC4 (MRP4) (pmol/mg total membrane protein)	0																							Sigmoidal Male n	0
		Abundance : SLC29A1 (ENT1) IT Mean	0			Muscle regional blood flow scalar : Male	1	Jejunum I ABCG2 (BCRP) (pmol/mg total membrane protein)	0.34																							Sigmoidal Female FBirth	0
		Abundance : SLC29A1 (ENT1) IT CV (%)	0			Muscle regional blood flow scalar CV (%) : Male	0	Jejunum I SLC2A2 (GLUT2) (pmol/mg total membrane protein)	0																							Sigmoidal Female AdultMax	0
		Abundance : SLC29A1 (ENT1) UT Mean	0					Jejunum I SLC10A2 (ASBT/IBAT) (pmol/mg total membrane protein)	0.01																							Sigmoidal Female Age50	0
		Abundance : SLC29A1 (ENT1) UT CV (%)	0			MPMLA - Thigh		Jejunum I SLC15A1 (PEPT1) (pmol/mg total membrane protein)	3.69																							Sigmoidal Female n	0
		Absolute Abundance : SLC29A2 (ENT2) (pmol/10^6 hepatocytes)	0			Skin surface pH : Male	5.5	Jejunum I SLC16A1 (MCT1) (pmol/mg total membrane protein)	0																							Parameter:	Viable Epidermis Thickness
		Abundance : SLC29A2 (ENT2) ET Mean	1			Skin surface pH CV (%) : Male	11	Jejunum I SLCO2B1 (OATP2B1) (pmol/mg total membrane protein)	0.4																							Sigmoidal Male FBirth	0
		Abundance : SLC29A2 (ENT2) ET CV (%)	60			Skin temperature °C : Male	32	Jejunum I SLCO4C1 (OATP4C1) (pmol/mg total membrane protein)	0																							Sigmoidal Male AdultMax	0
		Abundance : SLC29A2 (ENT2) PT Mean	0			Skin temperature CV (%) : Male	0	Jejunum I SLC22A1 (OCT1) (pmol/mg total membrane protein)	0.65																							Sigmoidal Male Age50	0
		Abundance : SLC29A2 (ENT2) PT CV (%)	0			Shape of corneocyte : Male	Cuboid (brick)	Jejunum I SLC22A3 (OCT3) (pmol/mg total membrane protein)	0.06																							Sigmoidal Male n	0
		Abundance : SLC29A2 (ENT2) IT Mean	0			Shape of corneocyte : Female	Cuboid (brick)	Jejunum I SLC22A4 (OCTN1) (pmol/mg total membrane protein)	0																							Sigmoidal Female FBirth	0
		Abundance : SLC29A2 (ENT2) IT CV (%)	0			Number of SC layers : Male	19	Jejunum I SLC51A/B (OST-α/β) (pmol/mg total membrane protein)	0.47																							Sigmoidal Female AdultMax	0
		Abundance : SLC29A2 (ENT2) UT Mean	0			Number of SC layers CV (%) : Male	15	Jejunum I Apical Influx (Intestine) (pmol/mg total membrane protein)	0																							Sigmoidal Female Age50	0
		Abundance : SLC29A2 (ENT2) UT CV (%)	0			Water density gm/cm3 : Male	1	Jejunum I Apical Efflux (Intestine) (pmol/mg total membrane protein)	0																							Sigmoidal Female n	0
		Absolute Abundance : SLC47A1 (MATE1) (pmol/10^6 hepatocytes)	0.146			Water density CV (%) : Male	0	Jejunum I Basolateral Influx (Intestine) (pmol/mg total membrane protein)	0																							Parameter:	Total Skin Thickness
		Abundance : SLC47A1 (MATE1) ET Mean	1			SC lipids density gm/cm3 : Male	0.9	Jejunum I Basolateral Efflux (Intestine) (pmol/mg total membrane protein)	0																							Sigmoidal Male FBirth	0
		Abundance : SLC47A1 (MATE1) ET CV (%)	51			SC lipids density CV (%) : Male	0	Jejunum I ABCB1 (P-gp/MDR1) (Relative values)	1																							Sigmoidal Male AdultMax	0
		Abundance : SLC47A1 (MATE1) PT Mean	0			SC proteins density gm/cm3 : Male	1.37	Jejunum I ABCC1 (MRP1) (Relative values)	1																							Sigmoidal Male Age50	0
		Abundance : SLC47A1 (MATE1) PT CV (%)	0			SC proteins density CV (%) : Male	0	Jejunum I ABCC2 (MRP2) (Relative values)	1																							Sigmoidal Male n	0
		Abundance : SLC47A1 (MATE1) IT Mean	0			Intercellular lipid thickness of SC µm : Male	0.091	Jejunum I ABCC3 (MRP3) (Relative values)	1																							Sigmoidal Female FBirth	0
		Abundance : SLC47A1 (MATE1) IT CV (%)	0			Intercellular lipid thickness of SC CV (%) : Male	0	Jejunum I ABCC4 (MRP4) (Relative values)	1																							Sigmoidal Female AdultMax	0
		Abundance : SLC47A1 (MATE1) UT Mean	0			Tortuosity : Male	User Defined	Jejunum I ABCG2 (BCRP) (Relative values)	1																							Sigmoidal Female Age50	0
		Abundance : SLC47A1 (MATE1) UT CV (%)	0			Tortuosity of lipid diffusion pathway of SC : Male	12.7	Jejunum I SLC2A2 (GLUT2) (Relative values)	1																							Sigmoidal Female n	0
		Absolute Abundance : SLC51A/B (OST-α/β) (pmol/10^6 hepatocytes)	0			Tortuosity of lipid diffusion pathway of SC CV (%) : Male	18	Jejunum I SLC10A2 (ASBT/IBAT) (Relative values)	1																							Parameter:	Local Subcutaneous Thickness
		Abundance : SLC51A/B (OST-α/β) ET Mean	1			Hair follicle diameter µm : Male	131.5	Jejunum I SLC15A1 (PEPT1) (Relative values)	1																							Sigmoidal Male FBirth	0
		Abundance : SLC51A/B (OST-α/β) ET CV (%)	60			Hair follicle diameter CV (%) : Male	31	Jejunum I SLC16A1 (MCT1) (Relative values)	1																							Sigmoidal Male AdultMax	0
		Abundance : SLC51A/B (OST-α/β) PT Mean	0			Hair follicle density N/cm2 : Male	17	Jejunum I SLCO2B1 (OATP2B1) (Relative values)	1																							Sigmoidal Male Age50	0
		Abundance : SLC51A/B (OST-α/β) PT CV (%)	0			Hair follicle density CV (%) : Male	24	Jejunum I SLCO4C1 (OATP4C1) (Relative values)	1																							Sigmoidal Male n	0
		Abundance : SLC51A/B (OST-α/β) IT Mean	0			Hair follicle depth µm : Male	315.1	Jejunum I SLC22A1 (OCT1) (Relative values)	1																							Sigmoidal Female FBirth	0
		Abundance : SLC51A/B (OST-α/β) IT CV (%)	0			Hair follicle depth CV (%) : Male	0	Jejunum I SLC22A3 (OCT3) (Relative values)	1																							Sigmoidal Female AdultMax	0
		Abundance : SLC51A/B (OST-α/β) UT Mean	0			Hair shaft diameter µm : Male	29.2	Jejunum I SLC22A4 (OCTN1) (Relative values)	1																							Sigmoidal Female Age50	0
		Abundance : SLC51A/B (OST-α/β) UT CV (%)	0			Hair shaft diameter CV (%) : Male	41	Jejunum I SLC51A/B (OST-α/β) (Relative values)	1																							Sigmoidal Female n	0
		Absolute Abundance : Sinusoidal Uptake (Liver) (pmol/10^6 hepatocytes)	0			Sebum viscosity centipose : Male	40	Jejunum I Apical Influx (Intestine) (Relative values)	1																							Parameter:	Local Muscle Thickness
		Abundance : Sinusoidal Uptake (Liver) ET Mean	1			Sebum viscosity CV (%) : Male	0	Jejunum I Apical Efflux (Intestine) (Relative values)	1																							Sigmoidal Male FBirth	0
		Abundance : Sinusoidal Uptake (Liver) ET CV (%)	0			Corneocyte pH [top] : Male	6.8	Jejunum I Basolateral Influx (Intestine) (Relative values)	1																							Sigmoidal Male AdultMax	0
		Abundance : Sinusoidal Uptake (Liver) PT Mean	0			Corneocyte pH [top] CV (%) : Male	6.8	Jejunum I Basolateral Efflux (Intestine) (Relative values)	1																							Sigmoidal Male Age50	0
		Abundance : Sinusoidal Uptake (Liver) PT CV (%)	0			Corneocyte thickness [top] µm : Male	0.87	Jejunum II Blood Flow (Qvilli %)	24.2																							Sigmoidal Male n	0
		Abundance : Sinusoidal Uptake (Liver) IT Mean	0			Corneocyte thickness [top] CV (%) : Male	26	Jejunum II Transit Time (% Total)	17.3																							Sigmoidal Female FBirth	0
		Abundance : Sinusoidal Uptake (Liver) IT CV (%)	0			Corneocyte width [top] µm : Male	34	Jejunum II CYP3A (% Total)	27.24																							Sigmoidal Female AdultMax	0
		Abundance : Sinusoidal Uptake (Liver) UT Mean	0			Corneocyte width [top] CV (%) : Male	15.1	Jejunum II S9PPI (% Total)	26.9																							Sigmoidal Female Age50	0
		Abundance : Sinusoidal Uptake (Liver) UT CV (%)	0			Corneocyte length [top] µm : Male	40.7	Jejunum II MPPI/CYP (% Total)	27.24																							Sigmoidal Female n	0
		Absolute Abundance : Sinusoidal Efflux (Liver) (pmol/10^6 hepatocytes)	0			Corneocyte length [top] CV (%) : Male	14.6	Jejunum II CPPI (% Total)	26.9
		Abundance : Sinusoidal Efflux (Liver) ET Mean	1			Hydration level (% water volume) [top] : Male	33.9	Jejunum II pH High Fat Fed	6.6
		Abundance : Sinusoidal Efflux (Liver) ET CV (%)	0			Hydration level (% water volume) [top] CV (%) : Male	9	Jejunum II CV pH High Fat Fed (%)	11
		Abundance : Sinusoidal Efflux (Liver) PT Mean	0			SC lipid viscosity [top] centipose : Male	75	Jejunum II pH Fed	6.6
		Abundance : Sinusoidal Efflux (Liver) PT CV (%)	0			SC lipid viscosity [top] CV (%) : Male	0	Jejunum II CV pH Fed (%)	11
		Abundance : Sinusoidal Efflux (Liver) IT Mean	0			Corneocyte pH [upper mid] : Male	6.8	Jejunum II pH Low Fat Fed	6.6
		Abundance : Sinusoidal Efflux (Liver) IT CV (%)	0			Corneocyte pH [upper mid] CV (%) : Male	6.8	Jejunum II CV pH Low Fat Fed (%)	11
		Abundance : Sinusoidal Efflux (Liver) UT Mean	0			Corneocyte thickness [upper mid] µm : Male	0.75	Jejunum II pH Fasted	6.6
		Abundance : Sinusoidal Efflux (Liver) UT CV (%)	0			Corneocyte thickness [upper mid] CV (%) : Male	26	Jejunum II CV pH Fasted (%)	11
		Absolute Abundance : Canalicular Efflux (Liver) (pmol/10^6 hepatocytes)	0			Corneocyte width [upper mid] µm : Male	34	Jejunum II Bicarbonate Buffer Concentration Fasted (mM)	9.94
		Abundance : Canalicular Efflux (Liver) ET Mean	1			Corneocyte width [upper mid] CV (%) : Male	15.1	Jejunum II Bicarbonate Buffer Concentration CV Fasted (%)	30
		Abundance : Canalicular Efflux (Liver) ET CV (%)	0			Corneocyte length [upper mid] µm : Male	40.7	Jejunum II Bicarbonate Buffer Concentration Fed (mM)	17.34
		Abundance : Canalicular Efflux (Liver) PT Mean	0			Corneocyte length [upper mid] CV (%) : Male	14.6	Jejunum II Bicarbonate Buffer Concentration CV Fed (%)	30
		Abundance : Canalicular Efflux (Liver) PT CV (%)	0			Hydration level (% water volume) [upper mid] : Male	44.6987	Jejunum II Luminal Fluid Velocity Fasted (m/s)	0.0013
		Abundance : Canalicular Efflux (Liver) IT Mean	0			Hydration level (% water volume) [upper mid] CV (%) : Male	6	Jejunum II Luminal Fluid Velocity CV Fasted (%)	56
		Abundance : Canalicular Efflux (Liver) IT CV (%)	0			SC lipid viscosity [upper mid] centipose : Male	75	Jejunum II Luminal Fluid Velocity Fed (m/s)	0.0013
		Abundance : Canalicular Efflux (Liver) UT Mean	0			SC lipid viscosity [upper mid] CV (%) : Male	0	Jejunum II Luminal Fluid Velocity CV Fed (%)	56
		Abundance : Canalicular Efflux (Liver) UT CV (%)	0			Corneocyte pH [lower mid] : Male	6.8	Jejunum II Endogenous Ion Hydrochloric Mean (mM)	126
						Corneocyte pH [lower mid] CV (%) : Male	6.8	Jejunum II Endogenous Ion Hydrochloric CV (%)	15.1
						Corneocyte thickness [lower mid] µm : Male	0.85	Jejunum II Endogenous Ion Hydrochloric Min (mM)	92
						Corneocyte thickness [lower mid] CV (%) : Male	26	Jejunum II Endogenous Ion Hydrochloric Max (mM)	181
						Corneocyte width [lower mid] µm : Male	34	Jejunum II Endogenous Ion Sodium Mean (mM)	142
						Corneocyte width [lower mid] CV (%) : Male	15.1	Jejunum II Endogenous Ion Sodium CV (%)	9.2
						Corneocyte length [lower mid] µm : Male	40.7	Jejunum II Endogenous Ion Sodium Min (mM)	111
						Corneocyte length [lower mid] CV (%) : Male	14.6	Jejunum II Endogenous Ion Sodium Max (mM)	165
						Hydration level (% water volume) [lower mid] : Male	55.5388	Jejunum II Endogenous Ion Potassium Mean (mM)	5.4
						Hydration level (% water volume) [lower mid] CV (%) : Male	5	Jejunum II Endogenous Ion Potassium CV (%)	38.9
						SC lipid viscosity [lower mid] centipose : Male	75	Jejunum II Endogenous Ion Potassium Min (mM)	1.7
						SC lipid viscosity [lower mid] CV (%) : Male	0	Jejunum II Endogenous Ion Potassium Max (mM)	11.6
						Corneocyte pH [bottom] : Male	6.8	Jejunum II Endogenous Ion Calcium Mean (mM)	0.5
						Corneocyte pH [bottom] CV (%) : Male	6.8	Jejunum II Endogenous Ion Calcium CV (%)	60
						Corneocyte thickness [bottom] µm : Male	0.96	Jejunum II Endogenous Ion Calcium Min (mM)	0.1
						Corneocyte thickness [bottom] CV (%) : Male	26	Jejunum II Endogenous Ion Calcium Max (mM)	1.3
						Corneocyte width [bottom] µm : Male	34	Jejunum II Endogenous Ion Generic Cation Mean (mM)	1
						Corneocyte width [bottom] CV (%) : Male	15.1	Jejunum II Endogenous Ion Generic Cation CV (%)	0
						Corneocyte length [bottom] µm : Male	40.7	Jejunum II Endogenous Ion Generic Cation Min (mM)	0.01
						Corneocyte length [bottom] CV (%) : Male	14.6	Jejunum II Endogenous Ion Generic Cation Max (mM)	1000
						Hydration level (% water volume) [bottom] : Male	66.4	Jejunum II Endogenous Ion Generic Anion Mean (mM)	1
						Hydration level (% water volume) [bottom] CV (%) : Male	4	Jejunum II Endogenous Ion Generic Anion CV (%)	0
						SC lipid viscosity [bottom] centipose : Male	75	Jejunum II Endogenous Ion Generic Anion Min (mM)	0.01
						SC lipid viscosity [bottom] CV (%) : Male	0	Jejunum II Endogenous Ion Generic Anion Max (mM)	1000
						Viable Epidermis thickness µm : Male	40	Jejunum II Fluid Viscosity Fasted (cP)	3
						Viable Epidermis thickness CV (%) : Male	19	Jejunum II Fluid Viscosity CV Fasted (%)	71
						Dermis thickness µm : Male	1240	Jejunum II Fluid Viscosity Fed (cP)	12
						Dermis thickness CV (%) : Male	20	Jejunum II Fluid Viscosity CV Fed (%)	14
						Subcutis thickness mm : Male	9.62	Jejunum II CMC fasted (mM)	1
						Subcutis thickness CV (%) : Male	48.3	Jejunum II CMC fed (mM)	1
						Muscle thickness mm : Male	32.81	Jejunum II Bile fasted (mM)	3.55
						Muscle thickness CV (%) : Male	38.03	Jejunum II Bile fasted CV (%)	42
						Dermis regional blood flow scalar : Male	0.839286	Jejunum II Bile fed (mM)	4.79
						Dermis regional blood flow scalar CV (%) : Male	0	Jejunum II Bile fed CV (%)	66
						Subcutis regional blood flow scalar : Male	1	Jejunum II Channel Depth Mean (µm)	448.81
						Subcutis regional blood flow scalar CV (%) : Male	0	Jejunum II Channel Depth CV (%)	21.82
						Muscle regional blood flow scalar : Male	1	Jejunum II Channel Width Mean (µm)	22.44
						Muscle regional blood flow scalar CV (%) : Male	0	Jejunum II Channel Width CV (%)	31.68
								Jejunum II Mean Thickness Mean (µm)	137.7
						MPMLA - Back		Jejunum II Mean Thickness CV (%)	14.42
						Skin surface pH : Male	5.2	Jejunum II Fold Expansion Mean	1.38
						Skin surface pH CV (%) : Male	8.4	Jejunum II Fold Expansion CV (%)	20.19
						Skin temperature °C : Male	32	Jejunum II Pore Radius Mean	8.6
						Skin temperature CV (%) : Male	0	Jejunum II Pore Radius CV (%)	0
						Shape of corneocyte : Male	Cuboid (brick)	Jejunum II Unstirred Layer Thickness Mean (µm)	123
						Shape of corneocyte : Female	Cuboid (brick)	Jejunum II Unstirred Layer Thickness CV (%)	3
						Number of SC layers : Male	17	Jejunum II Unstirred Layer pH	6.5
						Number of SC layers CV (%) : Male	16	Jejunum II Unstirred Layer CV (%)	0.5
						Water density gm/cm3 : Male	1	Jejunum II ABCB1 (P-gp/MDR1) (Relative values)	1.46
						Water density CV (%) : Male	0	Jejunum II ABCC1 (MRP1) (Relative values)	0.88
						SC lipids density gm/cm3 : Male	0.9	Jejunum II ABCC2 (MRP2) (Relative values)	1
						SC lipids density CV (%) : Male	0	Jejunum II ABCC3 (MRP3) (Relative values)	0.89
						SC proteins density gm/cm3 : Male	1.37	Jejunum II ABCC4 (MRP4) (Relative values)	1.22
						SC proteins density CV (%) : Male	0	Jejunum II ABCG2 (BCRP) (Relative values)	1
						Intercellular lipid thickness of SC µm : Male	0.091	Jejunum II SLC2A2 (GLUT2) (Relative values)	1
						Intercellular lipid thickness of SC CV (%) : Male	0	Jejunum II SLC10A2 (ASBT/IBAT) (Relative values)	4
						Tortuosity : Male	User Defined	Jejunum II SLC15A1 (PEPT1) (Relative values)	1.06
						Tortuosity of lipid diffusion pathway of SC : Male	12.7	Jejunum II SLC16A1 (MCT1) (Relative values)	1
						Tortuosity of lipid diffusion pathway of SC CV (%) : Male	18	Jejunum II SLCO2B1 (OATP2B1) (Relative values)	0.94
						Hair follicle diameter µm : Male	105.3	Jejunum II SLCO4C1 (OATP4C1) (Relative values)	1
						Hair follicle diameter CV (%) : Male	60	Jejunum II SLC22A1 (OCT1) (Relative values)	0.87
						Hair follicle density N/cm2 : Male	29	Jejunum II SLC22A3 (OCT3) (Relative values)	1.11
						Hair follicle density CV (%) : Male	31	Jejunum II SLC22A4 (OCTN1) (Relative values)	0.63
						Hair follicle depth µm : Male	446.5	Jejunum II SLC51A/B (OST-α/β) (Relative values)	1.89
						Hair follicle depth CV (%) : Male	0	Jejunum II Apical Influx (Intestine) (Relative values)	1
						Hair shaft diameter µm : Male	18.2	Jejunum II Apical Efflux (Intestine) (Relative values)	1
						Hair shaft diameter CV (%) : Male	37	Jejunum II Basolateral Influx (Intestine) (Relative values)	1
						Sebum viscosity centipose : Male	40	Jejunum II Basolateral Efflux (Intestine) (Relative values)	1
						Sebum viscosity CV (%) : Male	0	Ileum I Blood Flow (Qvilli %)	10.7
						Corneocyte pH [top] : Male	6.8	Ileum I Transit Time (% Total)	15.2
						Corneocyte pH [top] CV (%) : Male	6.8	Ileum I CYP3A (% Total)	7.94
						Corneocyte thickness [top] µm : Male	0.59	Ileum I S9PPI (% Total)	7.83
						Corneocyte thickness [top] CV (%) : Male	30	Ileum I MPPI/CYP (% Total)	7.94
						Corneocyte width [top] µm : Male	29.6	Ileum I CPPI (% Total)	7.83
						Corneocyte width [top] CV (%) : Male	5.9	Ileum I pH High Fat Fed	6.8
						Corneocyte length [top] µm : Male	36.4	Ileum I CV pH High Fat Fed (%)	10
						Corneocyte length [top] CV (%) : Male	5.7	Ileum I pH Fed	6.8
						Hydration level (% water volume) [top] : Male	33.9	Ileum I CV pH Fed (%)	10
						Hydration level (% water volume) [top] CV (%) : Male	9	Ileum I pH Low Fat Fed	6.8
						SC lipid viscosity [top] centipose : Male	75	Ileum I CV pH Low Fat Fed (%)	10
						SC lipid viscosity [top] CV (%) : Male	0	Ileum I pH Fasted	6.8
						Corneocyte pH [upper mid] : Male	6.8	Ileum I CV pH Fasted (%)	10
						Corneocyte pH [upper mid] CV (%) : Male	6.8	Ileum I Bicarbonate Buffer Concentration Fasted (mM)	30
						Corneocyte thickness [upper mid] µm : Male	0.67	Ileum I Bicarbonate Buffer Concentration CV Fasted (%)	30
						Corneocyte thickness [upper mid] CV (%) : Male	30	Ileum I Bicarbonate Buffer Concentration Fed (mM)	30
						Corneocyte width [upper mid] µm : Male	29.6	Ileum I Bicarbonate Buffer Concentration CV Fed (%)	30
						Corneocyte width [upper mid] CV (%) : Male	5.9	Ileum I Luminal Fluid Velocity Fasted (m/s)	0.0013
						Corneocyte length [upper mid] µm : Male	36.4	Ileum I Luminal Fluid Velocity CV Fasted (%)	56
						Corneocyte length [upper mid] CV (%) : Male	5.7	Ileum I Luminal Fluid Velocity Fed (m/s)	0.0013
						Hydration level (% water volume) [upper mid] : Male	44.6987	Ileum I Luminal Fluid Velocity CV Fed (%)	56
						Hydration level (% water volume) [upper mid] CV (%) : Male	6	Ileum I Endogenous Ion Hydrochloric Mean (mM)	113.3
						SC lipid viscosity [upper mid] centipose : Male	75	Ileum I Endogenous Ion Hydrochloric CV (%)	15.1
						SC lipid viscosity [upper mid] CV (%) : Male	0	Ileum I Endogenous Ion Hydrochloric Min (mM)	80.4
						Corneocyte pH [lower mid] : Male	6.8	Ileum I Endogenous Ion Hydrochloric Max (mM)	157.5
						Corneocyte pH [lower mid] CV (%) : Male	6.8	Ileum I Endogenous Ion Sodium Mean (mM)	136.3
						Corneocyte thickness [lower mid] µm : Male	0.76	Ileum I Endogenous Ion Sodium CV (%)	9.2
						Corneocyte thickness [lower mid] CV (%) : Male	30	Ileum I Endogenous Ion Sodium Min (mM)	107.4
						Corneocyte width [lower mid] µm : Male	29.6	Ileum I Endogenous Ion Sodium Max (mM)	171.8
						Corneocyte width [lower mid] CV (%) : Male	5.9	Ileum I Endogenous Ion Potassium Mean (mM)	6.1
						Corneocyte length [lower mid] µm : Male	36.4	Ileum I Endogenous Ion Potassium CV (%)	38.9
						Corneocyte length [lower mid] CV (%) : Male	5.7	Ileum I Endogenous Ion Potassium Min (mM)	4.6
						Hydration level (% water volume) [lower mid] : Male	55.5388	Ileum I Endogenous Ion Potassium Max (mM)	8
						Hydration level (% water volume) [lower mid] CV (%) : Male	5	Ileum I Endogenous Ion Calcium Mean (mM)	0.5
						SC lipid viscosity [lower mid] centipose : Male	75	Ileum I Endogenous Ion Calcium CV (%)	60
						SC lipid viscosity [lower mid] CV (%) : Male	0	Ileum I Endogenous Ion Calcium Min (mM)	0.1
						Corneocyte pH [bottom] : Male	6.8	Ileum I Endogenous Ion Calcium Max (mM)	1.3
						Corneocyte pH [bottom] CV (%) : Male	6.8	Ileum I Endogenous Ion Generic Cation Mean (mM)	1
						Corneocyte thickness [bottom] µm : Male	0.86	Ileum I Endogenous Ion Generic Cation CV (%)	0
						Corneocyte thickness [bottom] CV (%) : Male	30	Ileum I Endogenous Ion Generic Cation Min (mM)	0.01
						Corneocyte width [bottom] µm : Male	29.6	Ileum I Endogenous Ion Generic Cation Max (mM)	1000
						Corneocyte width [bottom] CV (%) : Male	5.9	Ileum I Endogenous Ion Generic Anion Mean (mM)	1
						Corneocyte length [bottom] µm : Male	36.4	Ileum I Endogenous Ion Generic Anion CV (%)	0
						Corneocyte length [bottom] CV (%) : Male	5.7	Ileum I Endogenous Ion Generic Anion Min (mM)	0.01
						Hydration level (% water volume) [bottom] : Male	66.4	Ileum I Endogenous Ion Generic Anion Max (mM)	1000
						Hydration level (% water volume) [bottom] CV (%) : Male	4	Ileum I Fluid Viscosity Fasted (cP)	3
						SC lipid viscosity [bottom] centipose : Male	75	Ileum I Fluid Viscosity CV Fasted (%)	71
						SC lipid viscosity [bottom] CV (%) : Male	0	Ileum I Fluid Viscosity Fed (cP)	9
						Viable Epidermis thickness µm : Male	45.655	Ileum I Fluid Viscosity CV Fed (%)	2
						Viable Epidermis thickness CV (%) : Male	15	Ileum I CMC fasted (mM)	1
						Dermis thickness µm : Male	1240	Ileum I CMC fed (mM)	1
						Dermis thickness CV (%) : Male	20	Ileum I Bile fasted (mM)	1.25
						Subcutis thickness mm : Male	6.93	Ileum I Bile fasted CV (%)	30
						Subcutis thickness CV (%) : Male	34.9	Ileum I Bile fed (mM)	5.86
						Muscle thickness mm : Male	19.3	Ileum I Bile fed CV (%)	84
						Muscle thickness CV (%) : Male	6.22	Ileum I Channel Depth Mean (µm)	289.94
						Dermis regional blood flow scalar : Male	1.03512	Ileum I Channel Depth CV (%)	49.37
						Dermis regional blood flow scalar CV (%) : Male	0	Ileum I Channel Width Mean (µm)	56.19
						Subcutis regional blood flow scalar : Male	1	Ileum I Channel Width CV (%)	30
						Subcutis regional blood flow scalar CV (%) : Male	0	Ileum I Mean Thickness Mean (µm)	127
						Muscle regional blood flow scalar : Male	1	Ileum I Mean Thickness CV (%)	30
						Muscle regional blood flow scalar CV (%) : Male	0	Ileum I Fold Expansion Mean	1.1
								Ileum I Fold Expansion CV (%)	9.15
						MPMLA - Physiology B		Ileum I Pore Radius Mean	8.6
						Skin surface pH : Male	0	Ileum I Pore Radius CV (%)	0
						Skin surface pH CV (%) : Male	0	Ileum I Unstirred Layer Thickness Mean (µm)	480
						Skin temperature °C : Male	0	Ileum I Unstirred Layer Thickness CV (%)	10
						Skin temperature CV (%) : Male	0	Ileum I Unstirred Layer pH	6.5
						Shape of corneocyte : Male	Cuboid (brick)	Ileum I Unstirred Layer CV (%)	0.5
						Shape of corneocyte : Female	Cuboid (brick)	Ileum I ABCB1 (P-gp/MDR1) (Relative values)	1.5
						Number of SC layers : Male	0	Ileum I ABCC1 (MRP1) (Relative values)	0.86
						Number of SC layers CV (%) : Male	0	Ileum I ABCC2 (MRP2) (Relative values)	0.6
						Water density gm/cm3 : Male	0	Ileum I ABCC3 (MRP3) (Relative values)	1.54
						Water density CV (%) : Male	0	Ileum I ABCC4 (MRP4) (Relative values)	1.71
						SC lipids density gm/cm3 : Male	0	Ileum I ABCG2 (BCRP) (Relative values)	0.78
						SC lipids density CV (%) : Male	0	Ileum I SLC2A2 (GLUT2) (Relative values)	1
						SC proteins density gm/cm3 : Male	0	Ileum I SLC10A2 (ASBT/IBAT) (Relative values)	98.44
						SC proteins density CV (%) : Male	0	Ileum I SLC15A1 (PEPT1) (Relative values)	1.23
						Intercellular lipid thickness of SC µm : Male	0	Ileum I SLC16A1 (MCT1) (Relative values)	1.29
						Intercellular lipid thickness of SC CV (%) : Male	0	Ileum I SLCO2B1 (OATP2B1) (Relative values)	1.28
						Tortuosity : Male	User Defined	Ileum I SLCO4C1 (OATP4C1) (Relative values)	1
						Tortuosity of lipid diffusion pathway of SC : Male	0	Ileum I SLC22A1 (OCT1) (Relative values)	1.29
						Tortuosity of lipid diffusion pathway of SC CV (%) : Male	0	Ileum I SLC22A3 (OCT3) (Relative values)	1.08
						Hair follicle diameter µm : Male	0	Ileum I SLC22A4 (OCTN1) (Relative values)	0.78
						Hair follicle diameter CV (%) : Male	0	Ileum I SLC51A/B (OST-α/β) (Relative values)	1.08
						Hair follicle density N/cm2 : Male	0	Ileum I Apical Influx (Intestine) (Relative values)	1
						Hair follicle density CV (%) : Male	0	Ileum I Apical Efflux (Intestine) (Relative values)	1
						Hair follicle depth µm : Male	0	Ileum I Basolateral Influx (Intestine) (Relative values)	1
						Hair follicle depth CV (%) : Male	0	Ileum I Basolateral Efflux (Intestine) (Relative values)	1
						Hair shaft diameter µm : Male	0	Ileum II Blood Flow (Qvilli %)	10.7
						Hair shaft diameter CV (%) : Male	0	Ileum II Transit Time (% Total)	15.2
						Sebum viscosity centipose : Male	0	Ileum II CYP3A (% Total)	7.94
						Sebum viscosity CV (%) : Male	0	Ileum II S9PPI (% Total)	7.83
						Corneocyte pH [top] : Male	0	Ileum II MPPI/CYP (% Total)	7.94
						Corneocyte pH [top] CV (%) : Male	0	Ileum II CPPI (% Total)	7.83
						Corneocyte thickness [top] µm : Male	0	Ileum II pH High Fat Fed	7
						Corneocyte thickness [top] CV (%) : Male	0	Ileum II CV pH High Fat Fed (%)	10
						Corneocyte width [top] µm : Male	0	Ileum II pH Fed	7
						Corneocyte width [top] CV (%) : Male	0	Ileum II CV pH Fed (%)	10
						Corneocyte length [top] µm : Male	0	Ileum II pH Low Fat Fed	7
						Corneocyte length [top] CV (%) : Male	0	Ileum II CV pH Low Fat Fed (%)	10
						Hydration level (% water volume) [top] : Male	0	Ileum II pH Fasted	7
						Hydration level (% water volume) [top] CV (%) : Male	0	Ileum II CV pH Fasted (%)	10
						SC lipid viscosity [top] centipose : Male	0	Ileum II Bicarbonate Buffer Concentration Fasted (mM)	30
						SC lipid viscosity [top] CV (%) : Male	0	Ileum II Bicarbonate Buffer Concentration CV Fasted (%)	30
						Corneocyte pH [upper mid] : Male	0	Ileum II Bicarbonate Buffer Concentration Fed (mM)	30
						Corneocyte pH [upper mid] CV (%) : Male	0	Ileum II Bicarbonate Buffer Concentration CV Fed (%)	30
						Corneocyte thickness [upper mid] µm : Male	0	Ileum II Luminal Fluid Velocity Fasted (m/s)	0.0013
						Corneocyte thickness [upper mid] CV (%) : Male	0	Ileum II Luminal Fluid Velocity CV Fasted (%)	56
						Corneocyte width [upper mid] µm : Male	0	Ileum II Luminal Fluid Velocity Fed (m/s)	0.0013
						Corneocyte width [upper mid] CV (%) : Male	0	Ileum II Luminal Fluid Velocity CV Fed (%)	56
						Corneocyte length [upper mid] µm : Male	0	Ileum II Endogenous Ion Hydrochloric Mean (mM)	100.5
						Corneocyte length [upper mid] CV (%) : Male	0	Ileum II Endogenous Ion Hydrochloric CV (%)	15.1
						Hydration level (% water volume) [upper mid] : Male	0	Ileum II Endogenous Ion Hydrochloric Min (mM)	71.4
						Hydration level (% water volume) [upper mid] CV (%) : Male	0	Ileum II Endogenous Ion Hydrochloric Max (mM)	139.7
						SC lipid viscosity [upper mid] centipose : Male	0	Ileum II Endogenous Ion Sodium Mean (mM)	130.5
						SC lipid viscosity [upper mid] CV (%) : Male	0	Ileum II Endogenous Ion Sodium CV (%)	9.2
						Corneocyte pH [lower mid] : Male	0	Ileum II Endogenous Ion Sodium Min (mM)	102.8
						Corneocyte pH [lower mid] CV (%) : Male	0	Ileum II Endogenous Ion Sodium Max (mM)	164.6
						Corneocyte thickness [lower mid] µm : Male	0	Ileum II Endogenous Ion Potassium Mean (mM)	6.7
						Corneocyte thickness [lower mid] CV (%) : Male	0	Ileum II Endogenous Ion Potassium CV (%)	38.9
						Corneocyte width [lower mid] µm : Male	0	Ileum II Endogenous Ion Potassium Min (mM)	5
						Corneocyte width [lower mid] CV (%) : Male	0	Ileum II Endogenous Ion Potassium Max (mM)	8.8
						Corneocyte length [lower mid] µm : Male	0	Ileum II Endogenous Ion Calcium Mean (mM)	0.5
						Corneocyte length [lower mid] CV (%) : Male	0	Ileum II Endogenous Ion Calcium CV (%)	60
						Hydration level (% water volume) [lower mid] : Male	0	Ileum II Endogenous Ion Calcium Min (mM)	0.1
						Hydration level (% water volume) [lower mid] CV (%) : Male	0	Ileum II Endogenous Ion Calcium Max (mM)	1.3
						SC lipid viscosity [lower mid] centipose : Male	0	Ileum II Endogenous Ion Generic Cation Mean (mM)	1
						SC lipid viscosity [lower mid] CV (%) : Male	0	Ileum II Endogenous Ion Generic Cation CV (%)	0
						Corneocyte pH [bottom] : Male	0	Ileum II Endogenous Ion Generic Cation Min (mM)	0.01
						Corneocyte pH [bottom] CV (%) : Male	0	Ileum II Endogenous Ion Generic Cation Max (mM)	1000
						Corneocyte thickness [bottom] µm : Male	0	Ileum II Endogenous Ion Generic Anion Mean (mM)	1
						Corneocyte thickness [bottom] CV (%) : Male	0	Ileum II Endogenous Ion Generic Anion CV (%)	0
						Corneocyte width [bottom] µm : Male	0	Ileum II Endogenous Ion Generic Anion Min (mM)	0.01
						Corneocyte width [bottom] CV (%) : Male	0	Ileum II Endogenous Ion Generic Anion Max (mM)	1000
						Corneocyte length [bottom] µm : Male	0	Ileum II Fluid Viscosity Fasted (cP)	3
						Corneocyte length [bottom] CV (%) : Male	0	Ileum II Fluid Viscosity CV Fasted (%)	71
						Hydration level (% water volume) [bottom] : Male	0	Ileum II Fluid Viscosity Fed (cP)	3
						Hydration level (% water volume) [bottom] CV (%) : Male	0	Ileum II Fluid Viscosity CV Fed (%)	71
						SC lipid viscosity [bottom] centipose : Male	0	Ileum II CMC fasted (mM)	1
						SC lipid viscosity [bottom] CV (%) : Male	0	Ileum II CMC fed (mM)	1
						Viable Epidermis thickness µm : Male	0	Ileum II Bile fasted (mM)	1.25
						Viable Epidermis thickness CV (%) : Male	0	Ileum II Bile fasted CV (%)	30
						Dermis thickness µm : Male	0	Ileum II Bile fed (mM)	8.61
						Dermis thickness CV (%) : Male	0	Ileum II Bile fed CV (%)	88
						Subcutis thickness mm : Male	0	Ileum II Channel Depth Mean (µm)	289.94
						Subcutis thickness CV (%) : Male	0	Ileum II Channel Depth CV (%)	49.37
						Muscle thickness mm : Male	0	Ileum II Channel Width Mean (µm)	56.19
						Muscle thickness CV (%) : Male	0	Ileum II Channel Width CV (%)	30
						Dermis regional blood flow scalar : Male	0	Ileum II Mean Thickness Mean (µm)	127
						Dermis regional blood flow scalar CV (%) : Male	0	Ileum II Mean Thickness CV (%)	30
						Subcutis regional blood flow scalar : Male	0	Ileum II Fold Expansion Mean	1.1
						Subcutis regional blood flow scalar CV (%) : Male	0	Ileum II Fold Expansion CV (%)	9.15
						Muscle regional blood flow scalar : Male	0	Ileum II Pore Radius Mean	8.6
						Muscle regional blood flow scalar CV (%) : Male	0	Ileum II Pore Radius CV (%)	0
								Ileum II Unstirred Layer Thickness Mean (µm)	480
						MPMLA - Forehead		Ileum II Unstirred Layer Thickness CV (%)	10
						Skin surface pH : Female	5	Ileum II Unstirred Layer pH	6.5
						Skin surface pH CV (%) : Female	8.9	Ileum II Unstirred Layer CV (%)	0.5
						Skin temperature °C : Female	32	Ileum II ABCB1 (P-gp/MDR1) (Relative values)	1.51
						Skin temperature CV (%) : Female	0	Ileum II ABCC1 (MRP1) (Relative values)	0.86
						Shape of corneocyte : Male	Cuboid (brick)	Ileum II ABCC2 (MRP2) (Relative values)	0.6
						Shape of corneocyte : Female	Cuboid (brick)	Ileum II ABCC3 (MRP3) (Relative values)	1.54
						Number of SC layers : Female	12	Ileum II ABCC4 (MRP4) (Relative values)	1.71
						Number of SC layers CV (%) : Female	8	Ileum II ABCG2 (BCRP) (Relative values)	0.78
						Water density gm/cm3 : Female	1	Ileum II SLC2A2 (GLUT2) (Relative values)	1
						Water density CV (%) : Female	0	Ileum II SLC10A2 (ASBT/IBAT) (Relative values)	98.44
						SC lipids density gm/cm3 : Female	0.9	Ileum II SLC15A1 (PEPT1) (Relative values)	1.23
						SC lipids density CV (%) : Female	0	Ileum II SLC16A1 (MCT1) (Relative values)	1.29
						SC proteins density gm/cm3 : Female	1.37	Ileum II SLCO2B1 (OATP2B1) (Relative values)	1.28
						SC proteins density CV (%) : Female	0	Ileum II SLCO4C1 (OATP4C1) (Relative values)	1
						Intercellular lipid thickness of SC µm : Female	0.091	Ileum II SLC22A1 (OCT1) (Relative values)	1.29
						Intercellular lipid thickness of SC CV (%) : Female	0	Ileum II SLC22A3 (OCT3) (Relative values)	1.08
						Tortuosity : Female	User Defined	Ileum II SLC22A4 (OCTN1) (Relative values)	0.78
						Tortuosity of lipid diffusion pathway of SC : Female	12.7	Ileum II SLC51A/B (OST-α/β) (Relative values)	1.08
						Tortuosity of lipid diffusion pathway of SC CV (%) : Female	18	Ileum II Apical Influx (Intestine) (Relative values)	1
						Hair follicle diameter µm : Female	65.4	Ileum II Apical Efflux (Intestine) (Relative values)	1
						Hair follicle diameter CV (%) : Female	83	Ileum II Basolateral Influx (Intestine) (Relative values)	1
						Hair follicle density N/cm2 : Female	292	Ileum II Basolateral Efflux (Intestine) (Relative values)	1
						Hair follicle density CV (%) : Female	16	Ileum III Blood Flow (Qvilli %)	10.7
						Hair follicle depth µm : Female	204.8	Ileum III Transit Time (% Total)	15.2
						Hair follicle depth CV (%) : Female	0	Ileum III CYP3A (% Total)	7.94
						Hair shaft diameter µm : Female	15.9	Ileum III S9PPI (% Total)	7.83
						Hair shaft diameter CV (%) : Female	57	Ileum III MPPI/CYP (% Total)	7.94
						Sebum viscosity centipose : Female	40	Ileum III CPPI (% Total)	7.83
						Sebum viscosity CV (%) : Female	0	Ileum III pH High Fat Fed	7.1
						Corneocyte pH [top] : Female	6.8	Ileum III CV pH High Fat Fed (%)	7
						Corneocyte pH [top] CV (%) : Female	6.8	Ileum III pH Fed	7.1
						Corneocyte thickness [top] µm : Female	0.71	Ileum III CV pH Fed (%)	7
						Corneocyte thickness [top] CV (%) : Female	36	Ileum III pH Low Fat Fed	7.1
						Corneocyte width [top] µm : Female	27.7	Ileum III CV pH Low Fat Fed (%)	7
						Corneocyte width [top] CV (%) : Female	9.2	Ileum III pH Fasted	7.1
						Corneocyte length [top] µm : Female	34.2	Ileum III CV pH Fasted (%)	7
						Corneocyte length [top] CV (%) : Female	4.1	Ileum III Bicarbonate Buffer Concentration Fasted (mM)	30
						Hydration level (% water volume) [top] : Female	35.5	Ileum III Bicarbonate Buffer Concentration CV Fasted (%)	30
						Hydration level (% water volume) [top] CV (%) : Female	17	Ileum III Bicarbonate Buffer Concentration Fed (mM)	30
						SC lipid viscosity [top] centipose : Female	75	Ileum III Bicarbonate Buffer Concentration CV Fed (%)	30
						SC lipid viscosity [top] CV (%) : Female	0	Ileum III Luminal Fluid Velocity Fasted (m/s)	0.0013
						Corneocyte pH [upper mid] : Female	6.8	Ileum III Luminal Fluid Velocity CV Fasted (%)	56
						Corneocyte pH [upper mid] CV (%) : Female	6.8	Ileum III Luminal Fluid Velocity Fed (m/s)	0.0013
						Corneocyte thickness [upper mid] µm : Female	0.81	Ileum III Luminal Fluid Velocity CV Fed (%)	56
						Corneocyte thickness [upper mid] CV (%) : Female	36	Ileum III Endogenous Ion Hydrochloric Mean (mM)	84
						Corneocyte width [upper mid] µm : Female	27.7	Ileum III Endogenous Ion Hydrochloric CV (%)	15.1
						Corneocyte width [upper mid] CV (%) : Female	9.2	Ileum III Endogenous Ion Hydrochloric Min (mM)	59.6
						Corneocyte length [upper mid] µm : Female	34.2	Ileum III Endogenous Ion Hydrochloric Max (mM)	116.7
						Corneocyte length [upper mid] CV (%) : Female	4.1	Ileum III Endogenous Ion Sodium Mean (mM)	128.9
						Hydration level (% water volume) [upper mid] : Female	46.1	Ileum III Endogenous Ion Sodium CV (%)	9.2
						Hydration level (% water volume) [upper mid] CV (%) : Female	11	Ileum III Endogenous Ion Sodium Min (mM)	101.5
						SC lipid viscosity [upper mid] centipose : Female	75	Ileum III Endogenous Ion Sodium Max (mM)	162.5
						SC lipid viscosity [upper mid] CV (%) : Female	0	Ileum III Endogenous Ion Potassium Mean (mM)	6.3
						Corneocyte pH [lower mid] : Female	6.8	Ileum III Endogenous Ion Potassium CV (%)	38.9
						Corneocyte pH [lower mid] CV (%) : Female	6.8	Ileum III Endogenous Ion Potassium Min (mM)	4.7
						Corneocyte thickness [lower mid] µm : Female	0.91	Ileum III Endogenous Ion Potassium Max (mM)	8.3
						Corneocyte thickness [lower mid] CV (%) : Female	36	Ileum III Endogenous Ion Calcium Mean (mM)	0.5
						Corneocyte width [lower mid] µm : Female	27.7	Ileum III Endogenous Ion Calcium CV (%)	60
						Corneocyte width [lower mid] CV (%) : Female	9.2	Ileum III Endogenous Ion Calcium Min (mM)	0.1
						Corneocyte length [lower mid] µm : Female	34.2	Ileum III Endogenous Ion Calcium Max (mM)	1.3
						Corneocyte length [lower mid] CV (%) : Female	4.1	Ileum III Endogenous Ion Generic Cation Mean (mM)	1
						Hydration level (% water volume) [lower mid] : Female	56.75	Ileum III Endogenous Ion Generic Cation CV (%)	0
						Hydration level (% water volume) [lower mid] CV (%) : Female	7	Ileum III Endogenous Ion Generic Cation Min (mM)	0.01
						SC lipid viscosity [lower mid] centipose : Female	75	Ileum III Endogenous Ion Generic Cation Max (mM)	1000
						SC lipid viscosity [lower mid] CV (%) : Female	0	Ileum III Endogenous Ion Generic Anion Mean (mM)	1
						Corneocyte pH [bottom] : Female	6.8	Ileum III Endogenous Ion Generic Anion CV (%)	0
						Corneocyte pH [bottom] CV (%) : Female	6.8	Ileum III Endogenous Ion Generic Anion Min (mM)	0.01
						Corneocyte thickness [bottom] µm : Female	1.03	Ileum III Endogenous Ion Generic Anion Max (mM)	1000
						Corneocyte thickness [bottom] CV (%) : Female	36	Ileum III Fluid Viscosity Fasted (cP)	3
						Corneocyte width [bottom] µm : Female	27.7	Ileum III Fluid Viscosity CV Fasted (%)	71
						Corneocyte width [bottom] CV (%) : Female	9.2	Ileum III Fluid Viscosity Fed (cP)	3
						Corneocyte length [bottom] µm : Female	34.2	Ileum III Fluid Viscosity CV Fed (%)	71
						Corneocyte length [bottom] CV (%) : Female	4.1	Ileum III CMC fasted (mM)	1
						Hydration level (% water volume) [bottom] : Female	67.4	Ileum III CMC fed (mM)	1
						Hydration level (% water volume) [bottom] CV (%) : Female	4	Ileum III Bile fasted (mM)	1.25
						SC lipid viscosity [bottom] centipose : Female	75	Ileum III Bile fasted CV (%)	30
						SC lipid viscosity [bottom] CV (%) : Female	0	Ileum III Bile fed (mM)	8.06
						Viable Epidermis thickness µm : Female	50.05	Ileum III Bile fed CV (%)	65
						Viable Epidermis thickness CV (%) : Female	7	Ileum III Channel Depth Mean (µm)	289.94
						Dermis thickness µm : Female	1250	Ileum III Channel Depth CV (%)	49.37
						Dermis thickness CV (%) : Female	45	Ileum III Channel Width Mean (µm)	56.19
						Subcutis thickness mm : Female	1.91	Ileum III Channel Width CV (%)	30
						Subcutis thickness CV (%) : Female	55.7	Ileum III Mean Thickness Mean (µm)	127
						Muscle thickness mm : Female	1.37	Ileum III Mean Thickness CV (%)	30
						Muscle thickness CV (%) : Female	4.38	Ileum III Fold Expansion Mean	1.08
						Dermis regional blood flow scalar : Female	2.13	Ileum III Fold Expansion CV (%)	16.07
						Dermis regional blood flow scalar CV (%) : Female	0	Ileum III Pore Radius Mean	8.6
						Subcutis regional blood flow scalar : Female	1	Ileum III Pore Radius CV (%)	0
						Subcutis regional blood flow scalar CV (%) : Female	0	Ileum III Unstirred Layer Thickness Mean (µm)	480
						Muscle regional blood flow scalar : Female	1	Ileum III Unstirred Layer Thickness CV (%)	10
						Muscle regional blood flow scalar CV (%) : Female	0	Ileum III Unstirred Layer pH	6.5
								Ileum III Unstirred Layer CV (%)	0.5
						MPMLA - Forearm Inner (volar)		Ileum III ABCB1 (P-gp/MDR1) (Relative values)	1.52
						Skin surface pH : Female	5.2	Ileum III ABCC1 (MRP1) (Relative values)	0.89
						Skin surface pH CV (%) : Female	8.1	Ileum III ABCC2 (MRP2) (Relative values)	0.6
						Skin temperature °C : Female	32	Ileum III ABCC3 (MRP3) (Relative values)	1.6
						Skin temperature CV (%) : Female	0	Ileum III ABCC4 (MRP4) (Relative values)	1.2
						Shape of corneocyte : Male	Cuboid (brick)	Ileum III ABCG2 (BCRP) (Relative values)	0.78
						Shape of corneocyte : Female	Cuboid (brick)	Ileum III SLC2A2 (GLUT2) (Relative values)	1
						Number of SC layers : Female	22	Ileum III SLC10A2 (ASBT/IBAT) (Relative values)	109.18
						Number of SC layers CV (%) : Female	20	Ileum III SLC15A1 (PEPT1) (Relative values)	1.24
						Water density gm/cm3 : Female	1	Ileum III SLC16A1 (MCT1) (Relative values)	1.29
						Water density CV (%) : Female	0	Ileum III SLCO2B1 (OATP2B1) (Relative values)	1.28
						SC lipids density gm/cm3 : Female	0.9	Ileum III SLCO4C1 (OATP4C1) (Relative values)	1
						SC lipids density CV (%) : Female	0	Ileum III SLC22A1 (OCT1) (Relative values)	1.3
						SC proteins density gm/cm3 : Female	1.37	Ileum III SLC22A3 (OCT3) (Relative values)	1.23
						SC proteins density CV (%) : Female	0	Ileum III SLC22A4 (OCTN1) (Relative values)	0.8
						Intercellular lipid thickness of SC µm : Female	0.091	Ileum III SLC51A/B (OST-α/β) (Relative values)	0.93
						Intercellular lipid thickness of SC CV (%) : Female	0	Ileum III Apical Influx (Intestine) (Relative values)	1
						Tortuosity : Female	User Defined	Ileum III Apical Efflux (Intestine) (Relative values)	1
						Tortuosity of lipid diffusion pathway of SC : Female	12.7	Ileum III Basolateral Influx (Intestine) (Relative values)	1
						Tortuosity of lipid diffusion pathway of SC CV (%) : Female	18	Ileum III Basolateral Efflux (Intestine) (Relative values)	1
						Hair follicle diameter µm : Female	77.7	Ileum IV Blood Flow (Qvilli %)	10.7
						Hair follicle diameter CV (%) : Female	32	Ileum IV Transit Time (% Total)	15.2
						Hair follicle density N/cm2 : Female	18	Ileum IV CYP3A (% Total)	7.94
						Hair follicle density CV (%) : Female	39	Ileum IV S9PPI (% Total)	7.83
						Hair follicle depth µm : Female	109.5	Ileum IV MPPI/CYP (% Total)	7.94
						Hair follicle depth CV (%) : Female	0	Ileum IV CPPI (% Total)	7.83
						Hair shaft diameter µm : Female	18	Ileum IV pH High Fat Fed	7.3
						Hair shaft diameter CV (%) : Female	34	Ileum IV CV pH High Fat Fed (%)	6
						Sebum viscosity centipose : Female	40	Ileum IV pH Fed	7.3
						Sebum viscosity CV (%) : Female	0	Ileum IV CV pH Fed (%)	6
						Corneocyte pH [top] : Female	6.8	Ileum IV pH Low Fat Fed	7.3
						Corneocyte pH [top] CV (%) : Female	6.8	Ileum IV CV pH Low Fat Fed (%)	6
						Corneocyte thickness [top] µm : Female	0.59	Ileum IV pH Fasted	7.3
						Corneocyte thickness [top] CV (%) : Female	22	Ileum IV CV pH Fasted (%)	6
						Corneocyte width [top] µm : Female	29.6	Ileum IV Bicarbonate Buffer Concentration Fasted (mM)	30
						Corneocyte width [top] CV (%) : Female	5.9	Ileum IV Bicarbonate Buffer Concentration CV Fasted (%)	30
						Corneocyte length [top] µm : Female	36.4	Ileum IV Bicarbonate Buffer Concentration Fed (mM)	30
						Corneocyte length [top] CV (%) : Female	5.7	Ileum IV Bicarbonate Buffer Concentration CV Fed (%)	30
						Hydration level (% water volume) [top] : Female	33.9	Ileum IV Luminal Fluid Velocity Fasted (m/s)	0.0013
						Hydration level (% water volume) [top] CV (%) : Female	9	Ileum IV Luminal Fluid Velocity CV Fasted (%)	56
						SC lipid viscosity [top] centipose : Female	75	Ileum IV Luminal Fluid Velocity Fed (m/s)	0.0013
						SC lipid viscosity [top] CV (%) : Female	0	Ileum IV Luminal Fluid Velocity CV Fed (%)	56
						Corneocyte pH [upper mid] : Female	6.8	Ileum IV Endogenous Ion Hydrochloric Mean (mM)	67.4
						Corneocyte pH [upper mid] CV (%) : Female	6.8	Ileum IV Endogenous Ion Hydrochloric CV (%)	15.1
						Corneocyte thickness [upper mid] µm : Female	0.67	Ileum IV Endogenous Ion Hydrochloric Min (mM)	58
						Corneocyte thickness [upper mid] CV (%) : Female	22	Ileum IV Endogenous Ion Hydrochloric Max (mM)	79
						Corneocyte width [upper mid] µm : Female	29.6	Ileum IV Endogenous Ion Sodium Mean (mM)	127.2
						Corneocyte width [upper mid] CV (%) : Female	5.9	Ileum IV Endogenous Ion Sodium CV (%)	9.2
						Corneocyte length [upper mid] µm : Female	36.4	Ileum IV Endogenous Ion Sodium Min (mM)	112
						Corneocyte length [upper mid] CV (%) : Female	5.7	Ileum IV Endogenous Ion Sodium Max (mM)	138
						Hydration level (% water volume) [upper mid] : Female	44.6987	Ileum IV Endogenous Ion Potassium Mean (mM)	5.9
						Hydration level (% water volume) [upper mid] CV (%) : Female	6	Ileum IV Endogenous Ion Potassium CV (%)	38.9
						SC lipid viscosity [upper mid] centipose : Female	75	Ileum IV Endogenous Ion Potassium Min (mM)	5.3
						SC lipid viscosity [upper mid] CV (%) : Female	0	Ileum IV Endogenous Ion Potassium Max (mM)	6.5
						Corneocyte pH [lower mid] : Female	6.8	Ileum IV Endogenous Ion Calcium Mean (mM)	0.5
						Corneocyte pH [lower mid] CV (%) : Female	6.8	Ileum IV Endogenous Ion Calcium CV (%)	60
						Corneocyte thickness [lower mid] µm : Female	0.76	Ileum IV Endogenous Ion Calcium Min (mM)	0.1
						Corneocyte thickness [lower mid] CV (%) : Female	22	Ileum IV Endogenous Ion Calcium Max (mM)	1.3
						Corneocyte width [lower mid] µm : Female	29.6	Ileum IV Endogenous Ion Generic Cation Mean (mM)	1
						Corneocyte width [lower mid] CV (%) : Female	5.9	Ileum IV Endogenous Ion Generic Cation CV (%)	0
						Corneocyte length [lower mid] µm : Female	36.4	Ileum IV Endogenous Ion Generic Cation Min (mM)	0.01
						Corneocyte length [lower mid] CV (%) : Female	5.7	Ileum IV Endogenous Ion Generic Cation Max (mM)	1000
						Hydration level (% water volume) [lower mid] : Female	55.5388	Ileum IV Endogenous Ion Generic Anion Mean (mM)	1
						Hydration level (% water volume) [lower mid] CV (%) : Female	5	Ileum IV Endogenous Ion Generic Anion CV (%)	0
						SC lipid viscosity [lower mid] centipose : Female	75	Ileum IV Endogenous Ion Generic Anion Min (mM)	0.01
						SC lipid viscosity [lower mid] CV (%) : Female	0	Ileum IV Endogenous Ion Generic Anion Max (mM)	1000
						Corneocyte pH [bottom] : Female	6.8	Ileum IV Fluid Viscosity Fasted (cP)	3
						Corneocyte pH [bottom] CV (%) : Female	6.8	Ileum IV Fluid Viscosity CV Fasted (%)	71
						Corneocyte thickness [bottom] µm : Female	0.86	Ileum IV Fluid Viscosity Fed (cP)	3
						Corneocyte thickness [bottom] CV (%) : Female	22	Ileum IV Fluid Viscosity CV Fed (%)	71
						Corneocyte width [bottom] µm : Female	29.6	Ileum IV CMC fasted (mM)	1
						Corneocyte width [bottom] CV (%) : Female	5.9	Ileum IV CMC fed (mM)	1
						Corneocyte length [bottom] µm : Female	36.4	Ileum IV Bile fasted (mM)	1.25
						Corneocyte length [bottom] CV (%) : Female	5.7	Ileum IV Bile fasted CV (%)	30
						Hydration level (% water volume) [bottom] : Female	66.4	Ileum IV Bile fed (mM)	5.96
						Hydration level (% water volume) [bottom] CV (%) : Female	4	Ileum IV Bile fed CV (%)	65
						SC lipid viscosity [bottom] centipose : Female	75	Ileum IV Channel Depth Mean (µm)	289.94
						SC lipid viscosity [bottom] CV (%) : Female	0	Ileum IV Channel Depth CV (%)	49.37
						Viable Epidermis thickness µm : Female	41.9655	Ileum IV Channel Width Mean (µm)	56.19
						Viable Epidermis thickness CV (%) : Female	19	Ileum IV Channel Width CV (%)	30
						Dermis thickness µm : Female	1240	Ileum IV Mean Thickness Mean (µm)	127
						Dermis thickness CV (%) : Female	20	Ileum IV Mean Thickness CV (%)	30
						Subcutis thickness mm : Female	1.91	Ileum IV Fold Expansion Mean	1.04
						Subcutis thickness CV (%) : Female	55.7	Ileum IV Fold Expansion CV (%)	12.4
						Muscle thickness mm : Female	23.81	Ileum IV Pore Radius Mean	8.6
						Muscle thickness CV (%) : Female	14.85	Ileum IV Pore Radius CV (%)	0
						Dermis regional blood flow scalar : Female	0.909226	Ileum IV Unstirred Layer Thickness Mean (µm)	480
						Dermis regional blood flow scalar CV (%) : Female	0	Ileum IV Unstirred Layer Thickness CV (%)	10
						Subcutis regional blood flow scalar : Female	1	Ileum IV Unstirred Layer pH	6.5
						Subcutis regional blood flow scalar CV (%) : Female	0	Ileum IV Unstirred Layer CV (%)	0.5
						Muscle regional blood flow scalar : Female	1	Ileum IV ABCB1 (P-gp/MDR1) (Relative values)	1.51
						Muscle regional blood flow scalar CV (%) : Female	0	Ileum IV ABCC1 (MRP1) (Relative values)	0.89
								Ileum IV ABCC2 (MRP2) (Relative values)	0.6
						MPMLA - Forearm Outer (dorsal)		Ileum IV ABCC3 (MRP3) (Relative values)	1.6
						Skin surface pH : Female	5.2	Ileum IV ABCC4 (MRP4) (Relative values)	1.2
						Skin surface pH CV (%) : Female	8.1	Ileum IV ABCG2 (BCRP) (Relative values)	0.78
						Skin temperature °C : Female	32	Ileum IV SLC2A2 (GLUT2) (Relative values)	1
						Skin temperature CV (%) : Female	0	Ileum IV SLC10A2 (ASBT/IBAT) (Relative values)	108
						Shape of corneocyte : Male	Cuboid (brick)	Ileum IV SLC15A1 (PEPT1) (Relative values)	1.24
						Shape of corneocyte : Female	Cuboid (brick)	Ileum IV SLC16A1 (MCT1) (Relative values)	1.29
						Number of SC layers : Female	22	Ileum IV SLCO2B1 (OATP2B1) (Relative values)	1.28
						Number of SC layers CV (%) : Female	20	Ileum IV SLCO4C1 (OATP4C1) (Relative values)	1
						Water density gm/cm3 : Female	1	Ileum IV SLC22A1 (OCT1) (Relative values)	1.3
						Water density CV (%) : Female	0	Ileum IV SLC22A3 (OCT3) (Relative values)	1.23
						SC lipids density gm/cm3 : Female	0.9	Ileum IV SLC22A4 (OCTN1) (Relative values)	0.8
						SC lipids density CV (%) : Female	0	Ileum IV SLC51A/B (OST-α/β) (Relative values)	0.93
						SC proteins density gm/cm3 : Female	1.37	Ileum IV Apical Influx (Intestine) (Relative values)	1
						SC proteins density CV (%) : Female	0	Ileum IV Apical Efflux (Intestine) (Relative values)	1
						Intercellular lipid thickness of SC µm : Female	0.091	Ileum IV Basolateral Influx (Intestine) (Relative values)	1
						Intercellular lipid thickness of SC CV (%) : Female	0	Ileum IV Basolateral Efflux (Intestine) (Relative values)	1
						Tortuosity : Female	User Defined	Colon pH High Fat Fed	6.33
						Tortuosity of lipid diffusion pathway of SC : Female	12.7	Colon CV pH High Fat Fed (%)	11.78
						Tortuosity of lipid diffusion pathway of SC CV (%) : Female	18	Colon pH Fed	6.5
						Hair follicle diameter µm : Female	77.7	Colon CV pH Fed (%)	15
						Hair follicle diameter CV (%) : Female	32	Colon pH Low Fat Fed	6.33
						Hair follicle density N/cm2 : Female	18	Colon CV pH Low Fat Fed (%)	11.78
						Hair follicle density CV (%) : Female	39	Colon pH Fasted	6.5
						Hair follicle depth µm : Female	109.5	Colon CV pH Fasted (%)	15
						Hair follicle depth CV (%) : Female	0	Colon Bicarbonate Buffer Concentration Fasted (mM)	90.87
						Hair shaft diameter µm : Female	18	Colon Bicarbonate Buffer Concentration CV Fasted (%)	30
						Hair shaft diameter CV (%) : Female	34	Colon Bicarbonate Buffer Concentration Fed (mM)	44.43
						Sebum viscosity centipose : Female	40	Colon Bicarbonate Buffer Concentration CV Fed (%)	30
						Sebum viscosity CV (%) : Female	0	Colon Luminal Fluid Velocity Fasted (m/s)	0.0013
						Corneocyte pH [top] : Female	6.8	Colon Luminal Fluid Velocity CV Fasted (%)	56
						Corneocyte pH [top] CV (%) : Female	6.8	Colon Luminal Fluid Velocity Fed (m/s)	0.0013
						Corneocyte thickness [top] µm : Female	0.69	Colon Luminal Fluid Velocity CV Fed (%)	56
						Corneocyte thickness [top] CV (%) : Female	22	Colon Endogenous Ion Hydrochloric Mean (mM)	14
						Corneocyte width [top] µm : Female	29.6	Colon Endogenous Ion Hydrochloric CV (%)	13
						Corneocyte width [top] CV (%) : Female	5.9	Colon Endogenous Ion Hydrochloric Min (mM)	7
						Corneocyte length [top] µm : Female	36.4	Colon Endogenous Ion Hydrochloric Max (mM)	20
						Corneocyte length [top] CV (%) : Female	5.7	Colon Endogenous Ion Sodium Mean (mM)	30
						Hydration level (% water volume) [top] : Female	33.9	Colon Endogenous Ion Sodium CV (%)	42
						Hydration level (% water volume) [top] CV (%) : Female	9	Colon Endogenous Ion Sodium Min (mM)	6
						SC lipid viscosity [top] centipose : Female	75	Colon Endogenous Ion Sodium Max (mM)	93
						SC lipid viscosity [top] CV (%) : Female	0	Colon Endogenous Ion Potassium Mean (mM)	77
						Corneocyte pH [upper mid] : Female	6.8	Colon Endogenous Ion Potassium CV (%)	11
						Corneocyte pH [upper mid] CV (%) : Female	6.8	Colon Endogenous Ion Potassium Min (mM)	40
						Corneocyte thickness [upper mid] µm : Female	0.79	Colon Endogenous Ion Potassium Max (mM)	108
						Corneocyte thickness [upper mid] CV (%) : Female	22	Colon Endogenous Ion Calcium Mean (mM)	20
						Corneocyte width [upper mid] µm : Female	29.6	Colon Endogenous Ion Calcium CV (%)	34
						Corneocyte width [upper mid] CV (%) : Female	5.9	Colon Endogenous Ion Calcium Min (mM)	7
						Corneocyte length [upper mid] µm : Female	36.4	Colon Endogenous Ion Calcium Max (mM)	85
						Corneocyte length [upper mid] CV (%) : Female	5.7	Colon Endogenous Ion Generic Cation Mean (mM)	1
						Hydration level (% water volume) [upper mid] : Female	44.6987	Colon Endogenous Ion Generic Cation CV (%)	0
						Hydration level (% water volume) [upper mid] CV (%) : Female	6	Colon Endogenous Ion Generic Cation Min (mM)	0.01
						SC lipid viscosity [upper mid] centipose : Female	75	Colon Endogenous Ion Generic Cation Max (mM)	1000
						SC lipid viscosity [upper mid] CV (%) : Female	0	Colon Endogenous Ion Generic Anion Mean (mM)	1
						Corneocyte pH [lower mid] : Female	6.8	Colon Endogenous Ion Generic Anion CV (%)	0
						Corneocyte pH [lower mid] CV (%) : Female	6.8	Colon Endogenous Ion Generic Anion Min (mM)	0.01
						Corneocyte thickness [lower mid] µm : Female	0.89	Colon Endogenous Ion Generic Anion Max (mM)	1000
						Corneocyte thickness [lower mid] CV (%) : Female	22	Colon Fluid Viscosity Fasted (cP)	3
						Corneocyte width [lower mid] µm : Female	29.6	Colon Fluid Viscosity CV Fasted (%)	71
						Corneocyte width [lower mid] CV (%) : Female	5.9	Colon Fluid Viscosity Fed (cP)	3
						Corneocyte length [lower mid] µm : Female	36.4	Colon Fluid Viscosity CV Fed (%)	71
						Corneocyte length [lower mid] CV (%) : Female	5.7	Colon CMC fasted (mM)	1
						Hydration level (% water volume) [lower mid] : Female	55.5388	Colon CMC fed (mM)	1
						Hydration level (% water volume) [lower mid] CV (%) : Female	5	Colon Bile fasted (mM)	0.6
						SC lipid viscosity [lower mid] centipose : Female	75	Colon Bile fasted CV (%)	50
						SC lipid viscosity [lower mid] CV (%) : Female	0	Colon Bile fed (mM)	0.6
						Corneocyte pH [bottom] : Female	6.8	Colon Bile fed CV (%)	50
						Corneocyte pH [bottom] CV (%) : Female	6.8	Colon Fold Expansion Mean	1
						Corneocyte thickness [bottom] µm : Female	1	Colon Fold Expansion CV (%)	0
						Corneocyte thickness [bottom] CV (%) : Female	22	Colon Pore Radius Mean	8.6
						Corneocyte width [bottom] µm : Female	29.6	Colon Pore Radius CV (%)	0
						Corneocyte width [bottom] CV (%) : Female	5.9	Colon Unstirred Layer Thickness Mean (µm)	830
						Corneocyte length [bottom] µm : Female	36.4	Colon Unstirred Layer Thickness CV (%)	13
						Corneocyte length [bottom] CV (%) : Female	5.7	Colon Unstirred Layer pH	6.5
						Hydration level (% water volume) [bottom] : Female	66.4	Colon Unstirred Layer CV (%)	0.5
						Hydration level (% water volume) [bottom] CV (%) : Female	4	Colon ABCB1 (P-gp/MDR1) (Relative values)	0.57
						SC lipid viscosity [bottom] centipose : Female	75	Colon ABCC1 (MRP1) (Relative values)	0.93
						SC lipid viscosity [bottom] CV (%) : Female	0	Colon ABCC2 (MRP2) (Relative values)	0.02
						Viable Epidermis thickness µm : Female	53.5684	Colon ABCC3 (MRP3) (Relative values)	5.95
						Viable Epidermis thickness CV (%) : Female	21	Colon ABCC4 (MRP4) (Relative values)	1.76
						Dermis thickness µm : Female	1240	Colon ABCG2 (BCRP) (Relative values)	0.57
						Dermis thickness CV (%) : Female	20	Colon SLC2A2 (GLUT2) (Relative values)	1
						Subcutis thickness mm : Female	1.91	Colon SLC10A2 (ASBT/IBAT) (Relative values)	1.1
						Subcutis thickness CV (%) : Female	55.7	Colon SLC15A1 (PEPT1) (Relative values)	0.03
						Muscle thickness mm : Female	23.81	Colon SLC16A1 (MCT1) (Relative values)	4.72
						Muscle thickness CV (%) : Female	14.85	Colon SLCO2B1 (OATP2B1) (Relative values)	1.06
						Dermis regional blood flow scalar : Female	0.5875	Colon SLCO4C1 (OATP4C1) (Relative values)	1
						Dermis regional blood flow scalar CV (%) : Female	0	Colon SLC22A1 (OCT1) (Relative values)	2.77
						Subcutis regional blood flow scalar : Female	1	Colon SLC22A3 (OCT3) (Relative values)	1.88
						Subcutis regional blood flow scalar CV (%) : Female	0	Colon SLC22A4 (OCTN1) (Relative values)	0.24
						Muscle regional blood flow scalar : Female	1	Colon SLC51A/B (OST-α/β) (Relative values)	0.71
						Muscle regional blood flow scalar CV (%) : Female	0	Colon Apical Influx (Intestine) (Relative values)	1
								Colon Apical Efflux (Intestine) (Relative values)	1
						MPMLA - Upper Arm		Colon Basolateral Influx (Intestine) (Relative values)	1
						Skin surface pH : Female	5.5	Colon Basolateral Efflux (Intestine) (Relative values)	1
						Skin surface pH CV (%) : Female	11.1	Luminal Fluid Density (mg/mL)	993.32
						Skin temperature °C : Female	32	Abundance : ABCB1 (P-gp/MDR1) ET Mean	1
						Skin temperature CV (%) : Female	0	Abundance : ABCB1 (P-gp/MDR1) ET CV (%)	65
						Shape of corneocyte : Male	Cuboid (brick)	Abundance : ABCB1 (P-gp/MDR1) PT Mean	0
						Shape of corneocyte : Female	Cuboid (brick)	Abundance : ABCB1 (P-gp/MDR1) PT CV (%)	0
						Number of SC layers : Female	18	Abundance : ABCB1 (P-gp/MDR1) IT Mean	0
						Number of SC layers CV (%) : Female	22	Abundance : ABCB1 (P-gp/MDR1) IT CV (%)	0
						Water density gm/cm3 : Female	1	Abundance : ABCB1 (P-gp/MDR1) UT Mean	0
						Water density CV (%) : Female	0	Abundance : ABCB1 (P-gp/MDR1) UT CV (%)	0
						SC lipids density gm/cm3 : Female	0.9	Abundance : ABCC1 (MRP1) ET Mean	1
						SC lipids density CV (%) : Female	0	Abundance : ABCC1 (MRP1) ET CV (%)	88
						SC proteins density gm/cm3 : Female	1.37	Abundance : ABCC1 (MRP1) PT Mean	0
						SC proteins density CV (%) : Female	0	Abundance : ABCC1 (MRP1) PT CV (%)	0
						Intercellular lipid thickness of SC µm : Female	0.091	Abundance : ABCC1 (MRP1) IT Mean	0
						Intercellular lipid thickness of SC CV (%) : Female	0	Abundance : ABCC1 (MRP1) IT CV (%)	0
						Tortuosity : Female	User Defined	Abundance : ABCC1 (MRP1) UT Mean	0
						Tortuosity of lipid diffusion pathway of SC : Female	12.7	Abundance : ABCC1 (MRP1) UT CV (%)	0
						Tortuosity of lipid diffusion pathway of SC CV (%) : Female	18	Abundance : ABCC2 (MRP2) ET Mean	1
						Hair follicle diameter µm : Female	88.8	Abundance : ABCC2 (MRP2) ET CV (%)	79
						Hair follicle diameter CV (%) : Female	33	Abundance : ABCC2 (MRP2) PT Mean	0
						Hair follicle density N/cm2 : Female	32	Abundance : ABCC2 (MRP2) PT CV (%)	0
						Hair follicle density CV (%) : Female	28	Abundance : ABCC2 (MRP2) IT Mean	0
						Hair follicle depth µm : Female	256.7	Abundance : ABCC2 (MRP2) IT CV (%)	0
						Hair follicle depth CV (%) : Female	0	Abundance : ABCC2 (MRP2) UT Mean	0
						Hair shaft diameter µm : Female	16.8	Abundance : ABCC2 (MRP2) UT CV (%)	0
						Hair shaft diameter CV (%) : Female	37	Abundance : ABCC3 (MRP3) ET Mean	1
						Sebum viscosity centipose : Female	40	Abundance : ABCC3 (MRP3) ET CV (%)	64
						Sebum viscosity CV (%) : Female	0	Abundance : ABCC3 (MRP3) PT Mean	0
						Corneocyte pH [top] : Female	6.8	Abundance : ABCC3 (MRP3) PT CV (%)	0
						Corneocyte pH [top] CV (%) : Female	6.8	Abundance : ABCC3 (MRP3) IT Mean	0
						Corneocyte thickness [top] µm : Female	0.71	Abundance : ABCC3 (MRP3) IT CV (%)	0
						Corneocyte thickness [top] CV (%) : Female	11	Abundance : ABCC3 (MRP3) UT Mean	0
						Corneocyte width [top] µm : Female	33.2	Abundance : ABCC3 (MRP3) UT CV (%)	0
						Corneocyte width [top] CV (%) : Female	10.4	Abundance : ABCC4 (MRP4) ET Mean	1
						Corneocyte length [top] µm : Female	40.4	Abundance : ABCC4 (MRP4) ET CV (%)	106
						Corneocyte length [top] CV (%) : Female	6.8	Abundance : ABCC4 (MRP4) PT Mean	0
						Hydration level (% water volume) [top] : Female	33.6	Abundance : ABCC4 (MRP4) PT CV (%)	0
						Hydration level (% water volume) [top] CV (%) : Female	11	Abundance : ABCC4 (MRP4) IT Mean	0
						SC lipid viscosity [top] centipose : Female	75	Abundance : ABCC4 (MRP4) IT CV (%)	0
						SC lipid viscosity [top] CV (%) : Female	0	Abundance : ABCC4 (MRP4) UT Mean	0
						Corneocyte pH [upper mid] : Female	6.8	Abundance : ABCC4 (MRP4) UT CV (%)	0
						Corneocyte pH [upper mid] CV (%) : Female	6.8	Abundance : ABCG2 (BCRP) ET Mean	1
						Corneocyte thickness [upper mid] µm : Female	0.81	Abundance : ABCG2 (BCRP) ET CV (%)	63
						Corneocyte thickness [upper mid] CV (%) : Female	11	Abundance : ABCG2 (BCRP) PT Mean	0.37
						Corneocyte width [upper mid] µm : Female	33.2	Abundance : ABCG2 (BCRP) PT CV (%)	63
						Corneocyte width [upper mid] CV (%) : Female	10.4	Abundance : ABCG2 (BCRP) IT Mean	0.67
						Corneocyte length [upper mid] µm : Female	40.4	Abundance : ABCG2 (BCRP) IT CV (%)	63
						Corneocyte length [upper mid] CV (%) : Female	6.8	Abundance : ABCG2 (BCRP) UT Mean	0
						Hydration level (% water volume) [upper mid] : Female	44.858	Abundance : ABCG2 (BCRP) UT CV (%)	0
						Hydration level (% water volume) [upper mid] CV (%) : Female	7	Abundance : SLC2A2 (GLUT2) ET Mean	1
						SC lipid viscosity [upper mid] centipose : Female	75	Abundance : SLC2A2 (GLUT2) ET CV (%)	31
						SC lipid viscosity [upper mid] CV (%) : Female	0	Abundance : SLC2A2 (GLUT2) PT Mean	0
						Corneocyte pH [lower mid] : Female	6.8	Abundance : SLC2A2 (GLUT2) PT CV (%)	0
						Corneocyte pH [lower mid] CV (%) : Female	6.8	Abundance : SLC2A2 (GLUT2) IT Mean	0
						Corneocyte thickness [lower mid] µm : Female	0.93	Abundance : SLC2A2 (GLUT2) IT CV (%)	0
						Corneocyte thickness [lower mid] CV (%) : Female	11	Abundance : SLC2A2 (GLUT2) UT Mean	0
						Corneocyte width [lower mid] µm : Female	33.2	Abundance : SLC2A2 (GLUT2) UT CV (%)	0
						Corneocyte width [lower mid] CV (%) : Female	10.4	Abundance : SLC10A2 (ASBT/IBAT) ET Mean	1
						Corneocyte length [lower mid] µm : Female	40.4	Abundance : SLC10A2 (ASBT/IBAT) ET CV (%)	43
						Corneocyte length [lower mid] CV (%) : Female	6.8	Abundance : SLC10A2 (ASBT/IBAT) PT Mean	0
						Hydration level (% water volume) [lower mid] : Female	56.0703	Abundance : SLC10A2 (ASBT/IBAT) PT CV (%)	0
						Hydration level (% water volume) [lower mid] CV (%) : Female	5	Abundance : SLC10A2 (ASBT/IBAT) IT Mean	0
						SC lipid viscosity [lower mid] centipose : Female	75	Abundance : SLC10A2 (ASBT/IBAT) IT CV (%)	0
						SC lipid viscosity [lower mid] CV (%) : Female	0	Abundance : SLC10A2 (ASBT/IBAT) UT Mean	0
						Corneocyte pH [bottom] : Female	6.8	Abundance : SLC10A2 (ASBT/IBAT) UT CV (%)	0
						Corneocyte pH [bottom] CV (%) : Female	6.8	Abundance : SLC15A1 (PEPT1) ET Mean	1
						Corneocyte thickness [bottom] µm : Female	1.04	Abundance : SLC15A1 (PEPT1) ET CV (%)	41
						Corneocyte thickness [bottom] CV (%) : Female	11	Abundance : SLC15A1 (PEPT1) PT Mean	0
						Corneocyte width [bottom] µm : Female	33.2	Abundance : SLC15A1 (PEPT1) PT CV (%)	0
						Corneocyte width [bottom] CV (%) : Female	10.4	Abundance : SLC15A1 (PEPT1) IT Mean	0
						Corneocyte length [bottom] µm : Female	40.4	Abundance : SLC15A1 (PEPT1) IT CV (%)	0
						Corneocyte length [bottom] CV (%) : Female	6.8	Abundance : SLC15A1 (PEPT1) UT Mean	0
						Hydration level (% water volume) [bottom] : Female	67.3	Abundance : SLC15A1 (PEPT1) UT CV (%)	0
						Hydration level (% water volume) [bottom] CV (%) : Female	4	Abundance : SLC16A1 (MCT1) ET Mean	1
						SC lipid viscosity [bottom] centipose : Female	75	Abundance : SLC16A1 (MCT1) ET CV (%)	75
						SC lipid viscosity [bottom] CV (%) : Female	0	Abundance : SLC16A1 (MCT1) PT Mean	0
						Viable Epidermis thickness µm : Female	51.8	Abundance : SLC16A1 (MCT1) PT CV (%)	0
						Viable Epidermis thickness CV (%) : Female	15	Abundance : SLC16A1 (MCT1) IT Mean	0
						Dermis thickness µm : Female	1540	Abundance : SLC16A1 (MCT1) IT CV (%)	0
						Dermis thickness CV (%) : Female	29	Abundance : SLC16A1 (MCT1) UT Mean	0
						Subcutis thickness mm : Female	9.64	Abundance : SLC16A1 (MCT1) UT CV (%)	0
						Subcutis thickness CV (%) : Female	56.2	Abundance : SLCO2B1 (OATP2B1) ET Mean	1
						Muscle thickness mm : Female	22.79	Abundance : SLCO2B1 (OATP2B1) ET CV (%)	74
						Muscle thickness CV (%) : Female	28.92	Abundance : SLCO2B1 (OATP2B1) PT Mean	0
						Dermis regional blood flow scalar : Female	1.2869	Abundance : SLCO2B1 (OATP2B1) PT CV (%)	0
						Dermis regional blood flow scalar CV (%) : Female	0	Abundance : SLCO2B1 (OATP2B1) IT Mean	0
						Subcutis regional blood flow scalar : Female	1	Abundance : SLCO2B1 (OATP2B1) IT CV (%)	0
						Subcutis regional blood flow scalar CV (%) : Female	0	Abundance : SLCO2B1 (OATP2B1) UT Mean	0
						Muscle regional blood flow scalar : Female	1	Abundance : SLCO2B1 (OATP2B1) UT CV (%)	0
						Muscle regional blood flow scalar CV (%) : Female	0	Abundance : SLCO4C1 (OATP4C1) ET Mean	1
								Abundance : SLCO4C1 (OATP4C1) ET CV (%)	60
						MPMLA - Face (cheek)		Abundance : SLCO4C1 (OATP4C1) PT Mean	0
						Skin surface pH : Female	5.3	Abundance : SLCO4C1 (OATP4C1) PT CV (%)	0
						Skin surface pH CV (%) : Female	7.4	Abundance : SLCO4C1 (OATP4C1) IT Mean	0
						Skin temperature °C : Female	32	Abundance : SLCO4C1 (OATP4C1) IT CV (%)	0
						Skin temperature CV (%) : Female	0	Abundance : SLCO4C1 (OATP4C1) UT Mean	0
						Shape of corneocyte : Male	Cuboid (brick)	Abundance : SLCO4C1 (OATP4C1) UT CV (%)	0
						Shape of corneocyte : Female	Cuboid (brick)	Abundance : SLC22A1 (OCT1) ET Mean	1
						Number of SC layers : Female	13	Abundance : SLC22A1 (OCT1) ET CV (%)	49
						Number of SC layers CV (%) : Female	23	Abundance : SLC22A1 (OCT1) PT Mean	0.01
						Water density gm/cm3 : Female	1	Abundance : SLC22A1 (OCT1) PT CV (%)	49
						Water density CV (%) : Female	0	Abundance : SLC22A1 (OCT1) IT Mean	0.62
						SC lipids density gm/cm3 : Female	0.9	Abundance : SLC22A1 (OCT1) IT CV (%)	49
						SC lipids density CV (%) : Female	0	Abundance : SLC22A1 (OCT1) UT Mean	1.14
						SC proteins density gm/cm3 : Female	1.37	Abundance : SLC22A1 (OCT1) UT CV (%)	49
						SC proteins density CV (%) : Female	0	Abundance : SLC22A3 (OCT3) ET Mean	1
						Intercellular lipid thickness of SC µm : Female	0.091	Abundance : SLC22A3 (OCT3) ET CV (%)	74
						Intercellular lipid thickness of SC CV (%) : Female	0	Abundance : SLC22A3 (OCT3) PT Mean	0
						Tortuosity : Female	User Defined	Abundance : SLC22A3 (OCT3) PT CV (%)	0
						Tortuosity of lipid diffusion pathway of SC : Female	12.7	Abundance : SLC22A3 (OCT3) IT Mean	0
						Tortuosity of lipid diffusion pathway of SC CV (%) : Female	18	Abundance : SLC22A3 (OCT3) IT CV (%)	0
						Hair follicle diameter µm : Female	65.4	Abundance : SLC22A3 (OCT3) UT Mean	0
						Hair follicle diameter CV (%) : Female	83	Abundance : SLC22A3 (OCT3) UT CV (%)	0
						Hair follicle density N/cm2 : Female	292	Abundance : SLC22A4 (OCTN1) ET Mean	1
						Hair follicle density CV (%) : Female	16	Abundance : SLC22A4 (OCTN1) ET CV (%)	106
						Hair follicle depth µm : Female	204.8	Abundance : SLC22A4 (OCTN1) PT Mean	0
						Hair follicle depth CV (%) : Female	0	Abundance : SLC22A4 (OCTN1) PT CV (%)	0
						Hair shaft diameter µm : Female	15.9	Abundance : SLC22A4 (OCTN1) IT Mean	0
						Hair shaft diameter CV (%) : Female	57	Abundance : SLC22A4 (OCTN1) IT CV (%)	0
						Sebum viscosity centipose : Female	40	Abundance : SLC22A4 (OCTN1) UT Mean	0
						Sebum viscosity CV (%) : Female	0	Abundance : SLC22A4 (OCTN1) UT CV (%)	0
						Corneocyte pH [top] : Female	6.8	Abundance : SLC51A/B (OST-α/β) ET Mean	1
						Corneocyte pH [top] CV (%) : Female	6.8	Abundance : SLC51A/B (OST-α/β) ET CV (%)	99
						Corneocyte thickness [top] µm : Female	0.47	Abundance : SLC51A/B (OST-α/β) PT Mean	0
						Corneocyte thickness [top] CV (%) : Female	4	Abundance : SLC51A/B (OST-α/β) PT CV (%)	0
						Corneocyte width [top] µm : Female	27.7	Abundance : SLC51A/B (OST-α/β) IT Mean	0
						Corneocyte width [top] CV (%) : Female	9.2	Abundance : SLC51A/B (OST-α/β) IT CV (%)	0
						Corneocyte length [top] µm : Female	34.2	Abundance : SLC51A/B (OST-α/β) UT Mean	0
						Corneocyte length [top] CV (%) : Female	4.1	Abundance : SLC51A/B (OST-α/β) UT CV (%)	0
						Hydration level (% water volume) [top] : Female	35.5	Abundance : Apical Influx (Intestine) ET Mean	1
						Hydration level (% water volume) [top] CV (%) : Female	17	Abundance : Apical Influx (Intestine) ET CV (%)	0
						SC lipid viscosity [top] centipose : Female	75	Abundance : Apical Influx (Intestine) PT Mean	0
						SC lipid viscosity [top] CV (%) : Female	0	Abundance : Apical Influx (Intestine) PT CV (%)	0
						Corneocyte pH [upper mid] : Female	6.8	Abundance : Apical Influx (Intestine) IT Mean	0
						Corneocyte pH [upper mid] CV (%) : Female	6.8	Abundance : Apical Influx (Intestine) IT CV (%)	0
						Corneocyte thickness [upper mid] µm : Female	0.53	Abundance : Apical Influx (Intestine) UT Mean	0
						Corneocyte thickness [upper mid] CV (%) : Female	4	Abundance : Apical Influx (Intestine) UT CV (%)	0
						Corneocyte width [upper mid] µm : Female	27.7	Abundance : Apical Efflux (Intestine) ET Mean	1
						Corneocyte width [upper mid] CV (%) : Female	9.2	Abundance : Apical Efflux (Intestine) ET CV (%)	0
						Corneocyte length [upper mid] µm : Female	34.2	Abundance : Apical Efflux (Intestine) PT Mean	0
						Corneocyte length [upper mid] CV (%) : Female	4.1	Abundance : Apical Efflux (Intestine) PT CV (%)	0
						Hydration level (% water volume) [upper mid] : Female	46.1	Abundance : Apical Efflux (Intestine) IT Mean	0
						Hydration level (% water volume) [upper mid] CV (%) : Female	11	Abundance : Apical Efflux (Intestine) IT CV (%)	0
						SC lipid viscosity [upper mid] centipose : Female	75	Abundance : Apical Efflux (Intestine) UT Mean	0
						SC lipid viscosity [upper mid] CV (%) : Female	0	Abundance : Apical Efflux (Intestine) UT CV (%)	0
						Corneocyte pH [lower mid] : Female	6.8	Abundance : Basolateral Influx (Intestine) ET Mean	1
						Corneocyte pH [lower mid] CV (%) : Female	6.8	Abundance : Basolateral Influx (Intestine) ET CV (%)	0
						Corneocyte thickness [lower mid] µm : Female	0.6	Abundance : Basolateral Influx (Intestine) PT Mean	0
						Corneocyte thickness [lower mid] CV (%) : Female	4	Abundance : Basolateral Influx (Intestine) PT CV (%)	0
						Corneocyte width [lower mid] µm : Female	27.7	Abundance : Basolateral Influx (Intestine) IT Mean	0
						Corneocyte width [lower mid] CV (%) : Female	9.2	Abundance : Basolateral Influx (Intestine) IT CV (%)	0
						Corneocyte length [lower mid] µm : Female	34.2	Abundance : Basolateral Influx (Intestine) UT Mean	0
						Corneocyte length [lower mid] CV (%) : Female	4.1	Abundance : Basolateral Influx (Intestine) UT CV (%)	0
						Hydration level (% water volume) [lower mid] : Female	56.75	Abundance : Basolateral Efflux (Intestine) ET Mean	1
						Hydration level (% water volume) [lower mid] CV (%) : Female	7	Abundance : Basolateral Efflux (Intestine) ET CV (%)	0
						SC lipid viscosity [lower mid] centipose : Female	75	Abundance : Basolateral Efflux (Intestine) PT Mean	0
						SC lipid viscosity [lower mid] CV (%) : Female	0	Abundance : Basolateral Efflux (Intestine) PT CV (%)	0
						Corneocyte pH [bottom] : Female	6.8	Abundance : Basolateral Efflux (Intestine) IT Mean	0
						Corneocyte pH [bottom] CV (%) : Female	6.8	Abundance : Basolateral Efflux (Intestine) IT CV (%)	0
						Corneocyte thickness [bottom] µm : Female	0.68	Abundance : Basolateral Efflux (Intestine) UT Mean	0
						Corneocyte thickness [bottom] CV (%) : Female	4	Abundance : Basolateral Efflux (Intestine) UT CV (%)	0
						Corneocyte width [bottom] µm : Female	27.7	Fasted Mean gastric emptying time (h)	0.75
						Corneocyte width [bottom] CV (%) : Female	9.2	Fasted CV gastric emptying time (%)	50
						Corneocyte length [bottom] µm : Female	34.2	Fed Liquid Mean gastric emptying time (h)	1.18
						Corneocyte length [bottom] CV (%) : Female	4.1	Fed Liquid CV gastric emptying time (%)	62
						Hydration level (% water volume) [bottom] : Female	67.4	Weibull Dist of transit time - alpha	2.92
						Hydration level (% water volume) [bottom] CV (%) : Female	4	Weibull Dist of transit time - beta	4.04
						SC lipid viscosity [bottom] centipose : Female	75	Mean colon transit time (h)	12
						SC lipid viscosity [bottom] CV (%) : Female	0	CV colon transit time (%)	30
						Viable Epidermis thickness µm : Female	46.8667	Initial volume of stomach fluid (mL/kg) - Fed [0 - 6 Months]	25
						Viable Epidermis thickness CV (%) : Female	24	Initial volume of stomach fluid (mL/kg) - Fed [6 Months - 6 Years]	20
						Dermis thickness µm : Female	1580	Initial volume of stomach fluid (mL/kg) - Fed [6 Years +]	15
						Dermis thickness CV (%) : Female	20	Initial volume of stomach fluid CV (%) - Fed	30
						Subcutis thickness mm : Female	1.91	Initial volume of stomach fluid (mL/kg) - Fasted	0.68
						Subcutis thickness CV (%) : Female	55.7	Initial volume of stomach fluid CV (%) - Fasted	30
						Muscle thickness mm : Female	12.6	Mean SITT (h)	3.33873
						Muscle thickness CV (%) : Female	9.9	Ionic Product (Kw) (10-14 mol2/dm6)	2.4
						Dermis regional blood flow scalar : Female	2.12619	Aqueous Diffusion Coefficients H+ (10-4 cm2/min)	6.94
						Dermis regional blood flow scalar CV (%) : Female	0	Aqueous Diffusion Coefficients OH- (10-4 cm2/min)	7.2
						Subcutis regional blood flow scalar : Female	1	Water Concentration (mM)	55560
						Subcutis regional blood flow scalar CV (%) : Female	0	Bicarbonate pKa Type	Effective
						Muscle regional blood flow scalar : Female	1	Bicarbonate pKa 1	4.2
						Muscle regional blood flow scalar CV (%) : Female	0	Bicarbonate pKa 2	9.79
								Aqueous Diffusion Coefficients 37oC (10-4 cm2/min) H2CO3	17.72
						MPMLA - Lower Leg		Aqueous Diffusion Coefficients 37oC (10-4 cm2/min) HCO3-	9.85
						Skin surface pH : Female	5.5	Aqueous Diffusion Coefficients 37oC (10-4 cm2/min) CO32-	6.98
						Skin surface pH CV (%) : Female	11	Advanced Fluid Volume Dynamics Model	No
						Skin temperature °C : Female	32	User Defined Intestinal Fluid Volumes?	No
						Skin temperature CV (%) : Female	0	Fasted Jejunum I basal fluid volume (mL)	21.1
						Shape of corneocyte : Male	Cuboid (brick)	Fasted Jejunum II basal fluid volume (mL)	21.1
						Shape of corneocyte : Female	Cuboid (brick)	Fasted Ileum I basal fluid volume (mL)	12.6
						Number of SC layers : Female	22	Fasted Ileum II basal fluid volume (mL)	12.6
						Number of SC layers CV (%) : Female	6	Fasted Ileum III basal fluid volume (mL)	12.6
						Water density gm/cm3 : Female	1	Fasted Ileum IV basal fluid volume (mL)	12.6
						Water density CV (%) : Female	0	Fasted Jejunum I-Ileum IV basal fluid volume %CV (%)	37
						SC lipids density gm/cm3 : Female	0.9	Fasted Colon basal fluid volume (mL)	13
						SC lipids density CV (%) : Female	0	Fasted Colon basal fluid volume %CV (%)	4.4
						SC proteins density gm/cm3 : Female	1.37	Fed Jejunum I basal fluid volume (mL)	21.1
						SC proteins density CV (%) : Female	0	Fed Jejunum II basal fluid volume (mL)	21.1
						Intercellular lipid thickness of SC µm : Female	0.091	Fed Ileum I basal fluid volume (mL)	12.6
						Intercellular lipid thickness of SC CV (%) : Female	0	Fed Ileum II basal fluid volume (mL)	12.6
						Tortuosity : Female	User Defined	Fed Ileum III basal fluid volume (mL)	12.6
						Tortuosity of lipid diffusion pathway of SC : Female	12.7	Fed Ileum IV basal fluid volume (mL)	12.6
						Tortuosity of lipid diffusion pathway of SC CV (%) : Female	18	Fed Jejunum I-Ileum IV basal fluid volume %CV (%)	37
						Hair follicle diameter µm : Female	168.4	Fed Colon basal fluid volume (mL)	13
						Hair follicle diameter CV (%) : Female	26	Fed Colon basal fluid volume %CV (%)	4.4
						Hair follicle density N/cm2 : Female	14	Fasted stomach Total Content mean (g)	50
						Hair follicle density CV (%) : Female	50	Fasted stomach Total Content CV (%)	30
						Hair follicle depth µm : Female	613.5	Fed stomach Total Content mean (g)	1000
						Hair follicle depth CV (%) : Female	0	Fed stomach Total Content CV (%)	30
						Hair shaft diameter µm : Female	42.1	Fasted duodenum Total Content mean (g)	34
						Hair shaft diameter CV (%) : Female	29	Fasted duodenum Total Content CV (%)	30
						Sebum viscosity centipose : Female	40	Fed duodenum Total Content mean (g)	34
						Sebum viscosity CV (%) : Female	0	Fed duodenum Total Content CV (%)	30
						Corneocyte pH [top] : Female	6.8	Fasted jejunum I Total Content mean (g)	23
						Corneocyte pH [top] CV (%) : Female	6.8	Fasted jejunum I Total Content CV (%)	30
						Corneocyte thickness [top] µm : Female	0.87	Fed jejunum I Total Content mean (g)	23
						Corneocyte thickness [top] CV (%) : Female	9	Fed jejunum I Total Content CV (%)	30
						Corneocyte width [top] µm : Female	29.6	Fasted jejunum II Total Content mean (g)	23
						Corneocyte width [top] CV (%) : Female	5.9	Fasted jejunum II Total Content CV (%)	30
						Corneocyte length [top] µm : Female	36.4	Fed jejunum II Total Content mean (g)	23
						Corneocyte length [top] CV (%) : Female	5.7	Fed jejunum II Total Content CV (%)	30
						Hydration level (% water volume) [top] : Female	33.9	Fasted ileum I Total Content mean (g)	14
						Hydration level (% water volume) [top] CV (%) : Female	9	Fasted ileum I Total Content CV (%)	30
						SC lipid viscosity [top] centipose : Female	75	Fed ileum I Total Content mean (g)	14
						SC lipid viscosity [top] CV (%) : Female	0	Fed ileum I Total Content CV (%)	30
						Corneocyte pH [upper mid] : Female	6.8	Fasted ileum II Total Content mean (g)	14
						Corneocyte pH [upper mid] CV (%) : Female	6.8	Fasted ileum II Total Content CV (%)	30
						Corneocyte thickness [upper mid] µm : Female	0.99	Fed ileum II Total Content mean (g)	14
						Corneocyte thickness [upper mid] CV (%) : Female	9	Fed ileum II Total Content CV (%)	30
						Corneocyte width [upper mid] µm : Female	29.6	Fasted ileum III Total Content mean (g)	14
						Corneocyte width [upper mid] CV (%) : Female	5.9	Fasted ileum III Total Content CV (%)	30
						Corneocyte length [upper mid] µm : Female	36.4	Fed ileum III Total Content mean (g)	14
						Corneocyte length [upper mid] CV (%) : Female	5.7	Fed ileum III Total Content CV (%)	30
						Hydration level (% water volume) [upper mid] : Female	44.6987	Fasted ileum IV Total Content mean (g)	14
						Hydration level (% water volume) [upper mid] CV (%) : Female	6	Fasted ileum IV Total Content CV (%)	30
						SC lipid viscosity [upper mid] centipose : Female	75	Fed ileum IV Total Content mean (g)	14
						SC lipid viscosity [upper mid] CV (%) : Female	0	Fed ileum IV Total Content CV (%)	30
						Corneocyte pH [lower mid] : Female	6.8	Fasted colon Total Content mean (g)	133.29
						Corneocyte pH [lower mid] CV (%) : Female	6.8	Fasted colon Total Content CV (%)	62.2
						Corneocyte thickness [lower mid] µm : Female	1.13	Fed colon Total Content mean (g)	133.29
						Corneocyte thickness [lower mid] CV (%) : Female	9	Fed colon Total Content CV (%)	62.2
						Corneocyte width [lower mid] µm : Female	29.6
						Corneocyte width [lower mid] CV (%) : Female	5.9
						Corneocyte length [lower mid] µm : Female	36.4
						Corneocyte length [lower mid] CV (%) : Female	5.7
						Hydration level (% water volume) [lower mid] : Female	55.5388
						Hydration level (% water volume) [lower mid] CV (%) : Female	5
						SC lipid viscosity [lower mid] centipose : Female	75
						SC lipid viscosity [lower mid] CV (%) : Female	0
						Corneocyte pH [bottom] : Female	6.8
						Corneocyte pH [bottom] CV (%) : Female	6.8
						Corneocyte thickness [bottom] µm : Female	1.27
						Corneocyte thickness [bottom] CV (%) : Female	9
						Corneocyte width [bottom] µm : Female	29.6
						Corneocyte width [bottom] CV (%) : Female	5.9
						Corneocyte length [bottom] µm : Female	36.4
						Corneocyte length [bottom] CV (%) : Female	5.7
						Hydration level (% water volume) [bottom] : Female	66.4
						Hydration level (% water volume) [bottom] CV (%) : Female	4
						SC lipid viscosity [bottom] centipose : Female	75
						SC lipid viscosity [bottom] CV (%) : Female	0
						Viable Epidermis thickness µm : Female	57.36
						Viable Epidermis thickness CV (%) : Female	8
						Dermis thickness µm : Female	1240
						Dermis thickness CV (%) : Female	20
						Subcutis thickness mm : Female	17.07
						Subcutis thickness CV (%) : Female	37.1
						Muscle thickness mm : Female	18.84
						Muscle thickness CV (%) : Female	18.63
						Dermis regional blood flow scalar : Female	0.839286
						Dermis regional blood flow scalar CV (%) : Female	0
						Subcutis regional blood flow scalar : Female	1
						Subcutis regional blood flow scalar CV (%) : Female	0
						Muscle regional blood flow scalar : Female	1
						Muscle regional blood flow scalar CV (%) : Female	0
						MPMLA - Thigh
						Skin surface pH : Female	5.5
						Skin surface pH CV (%) : Female	11
						Skin temperature °C : Female	32
						Skin temperature CV (%) : Female	0
						Shape of corneocyte : Male	Cuboid (brick)
						Shape of corneocyte : Female	Cuboid (brick)
						Number of SC layers : Female	19
						Number of SC layers CV (%) : Female	15
						Water density gm/cm3 : Female	1
						Water density CV (%) : Female	0
						SC lipids density gm/cm3 : Female	0.9
						SC lipids density CV (%) : Female	0
						SC proteins density gm/cm3 : Female	1.37
						SC proteins density CV (%) : Female	0
						Intercellular lipid thickness of SC µm : Female	0.091
						Intercellular lipid thickness of SC CV (%) : Female	0
						Tortuosity : Female	User Defined
						Tortuosity of lipid diffusion pathway of SC : Female	12.7
						Tortuosity of lipid diffusion pathway of SC CV (%) : Female	18
						Hair follicle diameter µm : Female	131.5
						Hair follicle diameter CV (%) : Female	31
						Hair follicle density N/cm2 : Female	17
						Hair follicle density CV (%) : Female	24
						Hair follicle depth µm : Female	315.1
						Hair follicle depth CV (%) : Female	0
						Hair shaft diameter µm : Female	29.2
						Hair shaft diameter CV (%) : Female	41
						Sebum viscosity centipose : Female	40
						Sebum viscosity CV (%) : Female	0
						Corneocyte pH [top] : Female	6.8
						Corneocyte pH [top] CV (%) : Female	6.8
						Corneocyte thickness [top] µm : Female	0.87
						Corneocyte thickness [top] CV (%) : Female	26
						Corneocyte width [top] µm : Female	34
						Corneocyte width [top] CV (%) : Female	15.1
						Corneocyte length [top] µm : Female	40.7
						Corneocyte length [top] CV (%) : Female	14.6
						Hydration level (% water volume) [top] : Female	33.9
						Hydration level (% water volume) [top] CV (%) : Female	9
						SC lipid viscosity [top] centipose : Female	75
						SC lipid viscosity [top] CV (%) : Female	0
						Corneocyte pH [upper mid] : Female	6.8
						Corneocyte pH [upper mid] CV (%) : Female	6.8
						Corneocyte thickness [upper mid] µm : Female	0.75
						Corneocyte thickness [upper mid] CV (%) : Female	26
						Corneocyte width [upper mid] µm : Female	34
						Corneocyte width [upper mid] CV (%) : Female	15.1
						Corneocyte length [upper mid] µm : Female	40.7
						Corneocyte length [upper mid] CV (%) : Female	14.6
						Hydration level (% water volume) [upper mid] : Female	44.6987
						Hydration level (% water volume) [upper mid] CV (%) : Female	6
						SC lipid viscosity [upper mid] centipose : Female	75
						SC lipid viscosity [upper mid] CV (%) : Female	0
						Corneocyte pH [lower mid] : Female	6.8
						Corneocyte pH [lower mid] CV (%) : Female	6.8
						Corneocyte thickness [lower mid] µm : Female	0.85
						Corneocyte thickness [lower mid] CV (%) : Female	26
						Corneocyte width [lower mid] µm : Female	34
						Corneocyte width [lower mid] CV (%) : Female	15.1
						Corneocyte length [lower mid] µm : Female	40.7
						Corneocyte length [lower mid] CV (%) : Female	14.6
						Hydration level (% water volume) [lower mid] : Female	55.5388
						Hydration level (% water volume) [lower mid] CV (%) : Female	5
						SC lipid viscosity [lower mid] centipose : Female	75
						SC lipid viscosity [lower mid] CV (%) : Female	0
						Corneocyte pH [bottom] : Female	6.8
						Corneocyte pH [bottom] CV (%) : Female	6.8
						Corneocyte thickness [bottom] µm : Female	0.96
						Corneocyte thickness [bottom] CV (%) : Female	26
						Corneocyte width [bottom] µm : Female	34
						Corneocyte width [bottom] CV (%) : Female	15.1
						Corneocyte length [bottom] µm : Female	40.7
						Corneocyte length [bottom] CV (%) : Female	14.6
						Hydration level (% water volume) [bottom] : Female	66.4
						Hydration level (% water volume) [bottom] CV (%) : Female	4
						SC lipid viscosity [bottom] centipose : Female	75
						SC lipid viscosity [bottom] CV (%) : Female	0
						Viable Epidermis thickness µm : Female	40
						Viable Epidermis thickness CV (%) : Female	19
						Dermis thickness µm : Female	1240
						Dermis thickness CV (%) : Female	20
						Subcutis thickness mm : Female	17.07
						Subcutis thickness CV (%) : Female	37.1
						Muscle thickness mm : Female	26.32
						Muscle thickness CV (%) : Female	42.45
						Dermis regional blood flow scalar : Female	0.839286
						Dermis regional blood flow scalar CV (%) : Female	0
						Subcutis regional blood flow scalar : Female	1
						Subcutis regional blood flow scalar CV (%) : Female	0
						Muscle regional blood flow scalar : Female	1
						Muscle regional blood flow scalar CV (%) : Female	0
						MPMLA - Back
						Skin surface pH : Female	5.2
						Skin surface pH CV (%) : Female	8.4
						Skin temperature °C : Female	32
						Skin temperature CV (%) : Female	0
						Shape of corneocyte : Male	Cuboid (brick)
						Shape of corneocyte : Female	Cuboid (brick)
						Number of SC layers : Female	18
						Number of SC layers CV (%) : Female	16
						Water density gm/cm3 : Female	1
						Water density CV (%) : Female	0
						SC lipids density gm/cm3 : Female	0.9
						SC lipids density CV (%) : Female	0
						SC proteins density gm/cm3 : Female	1.37
						SC proteins density CV (%) : Female	0
						Intercellular lipid thickness of SC µm : Female	0.091
						Intercellular lipid thickness of SC CV (%) : Female	0
						Tortuosity : Female	User Defined
						Tortuosity of lipid diffusion pathway of SC : Female	12.7
						Tortuosity of lipid diffusion pathway of SC CV (%) : Female	18
						Hair follicle diameter µm : Female	105.3
						Hair follicle diameter CV (%) : Female	60
						Hair follicle density N/cm2 : Female	29
						Hair follicle density CV (%) : Female	31
						Hair follicle depth µm : Female	446.5
						Hair follicle depth CV (%) : Female	0
						Hair shaft diameter µm : Female	18.2
						Hair shaft diameter CV (%) : Female	37
						Sebum viscosity centipose : Female	40
						Sebum viscosity CV (%) : Female	0
						Corneocyte pH [top] : Female	6.8
						Corneocyte pH [top] CV (%) : Female	6.8
						Corneocyte thickness [top] µm : Female	0.59
						Corneocyte thickness [top] CV (%) : Female	30
						Corneocyte width [top] µm : Female	29.6
						Corneocyte width [top] CV (%) : Female	5.9
						Corneocyte length [top] µm : Female	36.4
						Corneocyte length [top] CV (%) : Female	5.7
						Hydration level (% water volume) [top] : Female	33.9
						Hydration level (% water volume) [top] CV (%) : Female	9
						SC lipid viscosity [top] centipose : Female	75
						SC lipid viscosity [top] CV (%) : Female	0
						Corneocyte pH [upper mid] : Female	6.8
						Corneocyte pH [upper mid] CV (%) : Female	6.8
						Corneocyte thickness [upper mid] µm : Female	0.67
						Corneocyte thickness [upper mid] CV (%) : Female	30
						Corneocyte width [upper mid] µm : Female	29.6
						Corneocyte width [upper mid] CV (%) : Female	5.9
						Corneocyte length [upper mid] µm : Female	36.4
						Corneocyte length [upper mid] CV (%) : Female	5.7
						Hydration level (% water volume) [upper mid] : Female	44.6987
						Hydration level (% water volume) [upper mid] CV (%) : Female	6
						SC lipid viscosity [upper mid] centipose : Female	75
						SC lipid viscosity [upper mid] CV (%) : Female	0
						Corneocyte pH [lower mid] : Female	6.8
						Corneocyte pH [lower mid] CV (%) : Female	6.8
						Corneocyte thickness [lower mid] µm : Female	0.76
						Corneocyte thickness [lower mid] CV (%) : Female	30
						Corneocyte width [lower mid] µm : Female	29.6
						Corneocyte width [lower mid] CV (%) : Female	5.9
						Corneocyte length [lower mid] µm : Female	36.4
						Corneocyte length [lower mid] CV (%) : Female	5.7
						Hydration level (% water volume) [lower mid] : Female	55.5388
						Hydration level (% water volume) [lower mid] CV (%) : Female	5
						SC lipid viscosity [lower mid] centipose : Female	75
						SC lipid viscosity [lower mid] CV (%) : Female	0
						Corneocyte pH [bottom] : Female	6.8
						Corneocyte pH [bottom] CV (%) : Female	6.8
						Corneocyte thickness [bottom] µm : Female	0.86
						Corneocyte thickness [bottom] CV (%) : Female	30
						Corneocyte width [bottom] µm : Female	29.6
						Corneocyte width [bottom] CV (%) : Female	5.9
						Corneocyte length [bottom] µm : Female	36.4
						Corneocyte length [bottom] CV (%) : Female	5.7
						Hydration level (% water volume) [bottom] : Female	66.4
						Hydration level (% water volume) [bottom] CV (%) : Female	4
						SC lipid viscosity [bottom] centipose : Female	75
						SC lipid viscosity [bottom] CV (%) : Female	0
						Viable Epidermis thickness µm : Female	45.655
						Viable Epidermis thickness CV (%) : Female	15
						Dermis thickness µm : Female	1240
						Dermis thickness CV (%) : Female	20
						Subcutis thickness mm : Female	6.93
						Subcutis thickness CV (%) : Female	34.9
						Muscle thickness mm : Female	19.3
						Muscle thickness CV (%) : Female	6.22
						Dermis regional blood flow scalar : Female	1.03512
						Dermis regional blood flow scalar CV (%) : Female	0
						Subcutis regional blood flow scalar : Female	1
						Subcutis regional blood flow scalar CV (%) : Female	0
						Muscle regional blood flow scalar : Female	1
						Muscle regional blood flow scalar CV (%) : Female	0
						MPMLA - Physiology B
						Skin surface pH : Female	0
						Skin surface pH CV (%) : Female	0
						Skin temperature °C : Female	0
						Skin temperature CV (%) : Female	0
						Shape of corneocyte : Male	Cuboid (brick)
						Shape of corneocyte : Female	Cuboid (brick)
						Number of SC layers : Female	0
						Number of SC layers CV (%) : Female	0
						Water density gm/cm3 : Female	0
						Water density CV (%) : Female	0
						SC lipids density gm/cm3 : Female	0
						SC lipids density CV (%) : Female	0
						SC proteins density gm/cm3 : Female	0
						SC proteins density CV (%) : Female	0
						Intercellular lipid thickness of SC µm : Female	0
						Intercellular lipid thickness of SC CV (%) : Female	0
						Tortuosity : Female	User Defined
						Tortuosity of lipid diffusion pathway of SC : Female	0
						Tortuosity of lipid diffusion pathway of SC CV (%) : Female	0
						Hair follicle diameter µm : Female	0
						Hair follicle diameter CV (%) : Female	0
						Hair follicle density N/cm2 : Female	0
						Hair follicle density CV (%) : Female	0
						Hair follicle depth µm : Female	0
						Hair follicle depth CV (%) : Female	0
						Hair shaft diameter µm : Female	0
						Hair shaft diameter CV (%) : Female	0
						Sebum viscosity centipose : Female	0
						Sebum viscosity CV (%) : Female	0
						Corneocyte pH [top] : Female	0
						Corneocyte pH [top] CV (%) : Female	0
						Corneocyte thickness [top] µm : Female	0
						Corneocyte thickness [top] CV (%) : Female	0
						Corneocyte width [top] µm : Female	0
						Corneocyte width [top] CV (%) : Female	0
						Corneocyte length [top] µm : Female	0
						Corneocyte length [top] CV (%) : Female	0
						Hydration level (% water volume) [top] : Female	0
						Hydration level (% water volume) [top] CV (%) : Female	0
						SC lipid viscosity [top] centipose : Female	0
						SC lipid viscosity [top] CV (%) : Female	0
						Corneocyte pH [upper mid] : Female	0
						Corneocyte pH [upper mid] CV (%) : Female	0
						Corneocyte thickness [upper mid] µm : Female	0
						Corneocyte thickness [upper mid] CV (%) : Female	0
						Corneocyte width [upper mid] µm : Female	0
						Corneocyte width [upper mid] CV (%) : Female	0
						Corneocyte length [upper mid] µm : Female	0
						Corneocyte length [upper mid] CV (%) : Female	0
						Hydration level (% water volume) [upper mid] : Female	0
						Hydration level (% water volume) [upper mid] CV (%) : Female	0
						SC lipid viscosity [upper mid] centipose : Female	0
						SC lipid viscosity [upper mid] CV (%) : Female	0
						Corneocyte pH [lower mid] : Female	0
						Corneocyte pH [lower mid] CV (%) : Female	0
						Corneocyte thickness [lower mid] µm : Female	0
						Corneocyte thickness [lower mid] CV (%) : Female	0
						Corneocyte width [lower mid] µm : Female	0
						Corneocyte width [lower mid] CV (%) : Female	0
						Corneocyte length [lower mid] µm : Female	0
						Corneocyte length [lower mid] CV (%) : Female	0
						Hydration level (% water volume) [lower mid] : Female	0
						Hydration level (% water volume) [lower mid] CV (%) : Female	0
						SC lipid viscosity [lower mid] centipose : Female	0
						SC lipid viscosity [lower mid] CV (%) : Female	0
						Corneocyte pH [bottom] : Female	0
						Corneocyte pH [bottom] CV (%) : Female	0
						Corneocyte thickness [bottom] µm : Female	0
						Corneocyte thickness [bottom] CV (%) : Female	0
						Corneocyte width [bottom] µm : Female	0
						Corneocyte width [bottom] CV (%) : Female	0
						Corneocyte length [bottom] µm : Female	0
						Corneocyte length [bottom] CV (%) : Female	0
						Hydration level (% water volume) [bottom] : Female	0
						Hydration level (% water volume) [bottom] CV (%) : Female	0
						SC lipid viscosity [bottom] centipose : Female	0
						SC lipid viscosity [bottom] CV (%) : Female	0
						Viable Epidermis thickness µm : Female	0
						Viable Epidermis thickness CV (%) : Female	0
						Dermis thickness µm : Female	0
						Dermis thickness CV (%) : Female	0
						Subcutis thickness mm : Female	0
						Subcutis thickness CV (%) : Female	0
						Muscle thickness mm : Female	0
						Muscle thickness CV (%) : Female	0
						Dermis regional blood flow scalar : Female	0
						Dermis regional blood flow scalar CV (%) : Female	0
						Subcutis regional blood flow scalar : Female	0
						Subcutis regional blood flow scalar CV (%) : Female	0
						Muscle regional blood flow scalar : Female	0
						Muscle regional blood flow scalar CV (%) : Female	0

## Sheet: Population Script
Height / Weight Script
function defineHT(age, isMale)
if isMale then
if age <= 18 then
HT = 0.0000176179*age^7 - 0.00119874*age^6 + 0.0323848*age^5 - 0.444112*age^4 + 3.2946*age^3 - 13.2191*age^2 + 33.75*age + 52.62152
else
HT = 175.32 + 0.1113 * age -0.0025 * age^2
end
else
if age <= 18 then
HT = -0.00000151027*age^8 + 0.000121261*age^7 -0.0040023*age^6 + 0.070179*age^5 - 0.708233*age^4 + 4.1872*age^3 -14.3393*age^2 + 33.84778*age + 51.535477
else
HT = 161.66 + 0.1319 * age -0.0027 * age^2
end
end
return HT
end
function defineWT(age, isMale, HT)
if isMale then
WT = 7.826 * (1.0 - math.exp(age * -1.2)) + math.exp((HT * 0.0209) + (0.023 * age))
else
WT = 5.454 * (1.0 - math.exp(age * -1.57)) + math.exp((HT * 0.0224) + (0.019 * age))
end
return WT
end
Paediatric Haematocrit Script
function defineHct(age, HT, WT, isMale)_x000D_
-- Haematocrit (%) as a function of individual age per gender_x000D_
if isMale then_x000D_
Hct = 53 - ((43.0 * age^1.12 / (0.05^1.12 + age^1.12)) * (1 + (-0.93 * age^0.25 / (0.10^0.25 + age^0.25))))_x000D_
else_x000D_
Hct = 53 - ((37.4 * age^1.12 / (0.05^1.12 + age^1.12)) * (1 + (-0.80 * age^0.25 / (0.10^0.25 + age^0.25)))) _x000D_
end _x000D_
return Hct_x000D_
_x000D_
end
Paediatric Binding Protein Levels Script
function defineAGP(age, HT, WT, isMale)_x000D_
-- define alpha-1 acid glycoprotein (g/L) as a function of age in years_x000D_
AGP = 0.887 * (365*age)^0.38 / ( 8.89^0.38 + (365*age)^0.38 )_x000D_
return AGP_x000D_
end_x000D_
_x000D_
function defineHSA(age, HT, WT, isMale)_x000D_
-- define human serum albumin (g/L) as a function of age in years_x000D_
HSA = 33.746 + 1.1287 * math.log(365*age)_x000D_
return HSA_x000D_
end_x000D_
Paediatric Tissue Composition Script
function DefineTissueWater(Tissue, age) --Define percentages of water in tissues _x000D_
_x000D_
if Tissue == 0 then _x000D_
-- adipose_x000D_
water = 32.154 - 2.7863 * math.log(age)_x000D_
_x000D_
elseif Tissue == 1 then_x000D_
-- bone_x000D_
water = 64.179 - 1.2697 * age_x000D_
_x000D_
elseif Tissue == 2 then_x000D_
-- brain_x000D_
water = 83.356 - 1.2627 * math.log(age)_x000D_
_x000D_
elseif Tissue == 3 then_x000D_
-- gut_x000D_
water = 75.378 - 0.3932 * math.log(age)_x000D_
_x000D_
elseif Tissue == 4 then_x000D_
-- heart_x000D_
water = 84.523 - 0.4249 * age_x000D_
_x000D_
elseif Tissue == 5 then _x000D_
-- kidney_x000D_
water = 83.278 - 0.2162 * age_x000D_
_x000D_
elseif Tissue == 6 then_x000D_
-- liver_x000D_
water = 75.690 - 0.573 * math.log(age)_x000D_
_x000D_
elseif Tissue == 7 then_x000D_
-- lung_x000D_
water = 80.973 - 0.4916 * math.log(age)_x000D_
_x000D_
elseif Tissue == 8 then_x000D_
-- muscle_x000D_
water = 77.211 - 0.4321 * math.log(age)_x000D_
_x000D_
elseif Tissue == 15 then_x000D_
-- pancreas_x000D_
water = 78.4_x000D_
_x000D_
elseif Tissue == 9 then_x000D_
-- skin_x000D_
water = 72.395 - 1.1462 * math.log(age)_x000D_
_x000D_
elseif Tissue == 10 then_x000D_
-- spleen_x000D_
water = 79.952 - 0.4178 * math.log(age)_x000D_
_x000D_
elseif Tissue == 11 then _x000D_
-- plasma_x000D_
water = 96 - 0.0875 * age_x000D_
_x000D_
elseif Tissue == 12 then_x000D_
-- RBC_x000D_
water = 66.0_x000D_
end_x000D_
_x000D_
return water_x000D_
end_x000D_
_x000D_
_x000D_
_x000D_
function DefineTissueFat(Tissue, age) --Define percentages of Fat tissue _x000D_
_x000D_
if Tissue == 0 then _x000D_
-- adipose_x000D_
Fat = 35.5 + 43.46 * age /(1.50 + age)_x000D_
_x000D_
elseif Tissue == 1 then_x000D_
-- bone_x000D_
Fat = 0.20 + 0.3655 * age_x000D_
_x000D_
elseif Tissue == 2 then_x000D_
-- brain_x000D_
Fat = 2.75 + 9.76 * age / (2.74 + age)_x000D_
_x000D_
elseif Tissue == 3 then_x000D_
-- gut_x000D_
Fat = 2.50 + 0.185 * age_x000D_
_x000D_
elseif Tissue == 4 then_x000D_
-- heart_x000D_
Fat = 2.3159 + 0.0797 * age_x000D_
_x000D_
elseif Tissue == 5 then _x000D_
-- kidney_x000D_
Fat = 2.73 + 1.995 * age /(2.59 + age)_x000D_
_x000D_
elseif Tissue == 6 then_x000D_
-- liver_x000D_
Fat = 3.00 + 3.089 * age/(1.80 + age)_x000D_
_x000D_
elseif Tissue == 7 then_x000D_
-- lung_x000D_
Fat = 1.857 - 0.211 * math.log(age)_x000D_
_x000D_
elseif Tissue == 8 then_x000D_
-- muscle_x000D_
Fat = 1.9852 + 0.0649 * age_x000D_
_x000D_
elseif Tissue == 15 then_x000D_
-- pancreas_x000D_
Fat = 5.03_x000D_
_x000D_
elseif Tissue == 9 then_x000D_
-- skin_x000D_
Fat = 3.95_x000D_
_x000D_
elseif Tissue == 10 then_x000D_
-- spleen_x000D_
Fat = 1.5 + 0.015 * age_x000D_
_x000D_
elseif Tissue == 11 then _x000D_
-- plasma_x000D_
Fat = 0.5578 + 0.036 * math.log(age)_x000D_
_x000D_
elseif Tissue == 12 then_x000D_
-- RBC_x000D_
Fat = 0.3_x000D_
end_x000D_
_x000D_
return Fat_x000D_
end_x000D_
_x000D_
Paediatric Tissue Volumes Script
function DefineTissueVolume(Tissue, isMale, AGE, WT, HT, BSA, BMI, Haematocrit) -- Define volume of tissues in Litres_x000D_
-- AGE is age in year;_x000D_
-- WT is the body weight in kg;_x000D_
-- HT is the height in cm;_x000D_
-- BSA is body surface area in square metre_x000D_
-- BMI is in body mass index in kg per square metre_x000D_
-- Haematocrit is in percentage_x000D_
_x000D_
M_FFM = 1.480 * WT ^ 0.778 * (HT/100) ^ 0.625 -- Male Fat Free Mass (kg)_x000D_
F_FFM = 1.625 * WT ^ 0.736 * (HT/100) ^ 0.561 -- Female Fat Free Mass (kg)_x000D_
_x000D_
if Tissue == sc.TISSUE_ADIPOSE then_x000D_
if isMale then_x000D_
Volume = (WT - M_FFM) / 0.856 /0.923_x000D_
else_x000D_
Volume = (WT - F_FFM) / 0.834 /0.923_x000D_
end_x000D_
_x000D_
elseif Tissue == sc.TISSUE_BONE then_x000D_
-- bone // -- bone density = (0.0067 * AGE + 1.65)_x000D_
if isMale then_x000D_
Volume = (0.31 * WT ^ 0.47 * (HT/100) ^ 1.75)/(0.0067 * AGE + 1.65)_x000D_
else_x000D_
Volume = (0.624 * WT ^ 0.219 * (HT/100) ^ 2.66)/(0.0067 * AGE + 1.65)_x000D_
end_x000D_
_x000D_
elseif Tissue == sc.TISSUE_BRAIN then_x000D_
if isMale then_x000D_
Volume = 0.5311 * WT - 0.099 * WT * math.log(HT)_x000D_
else_x000D_
Volume = 0.5545 * WT - 0.1046 * WT * math.log(HT)_x000D_
end_x000D_
_x000D_
elseif Tissue == sc.TISSUE_GUT then_x000D_
if isMale then_x000D_
Volume = (0.148 * WT ^ 0.28 * (HT/100) ^ 1.55) / 1.04_x000D_
else_x000D_
Volume = (0.075 * WT ^ 0.52 * (HT/100) ^ 1.12) / 1.04_x000D_
end_x000D_
_x000D_
elseif Tissue == sc.TISSUE_HEART then_x000D_
if isMale then_x000D_
Volume = (0.149 * BSA ^1.3 ) / 1.04_x000D_
else_x000D_
Volume = (0.13 * BSA ^ 1.19 )/ 1.04_x000D_
end_x000D_
_x000D_
elseif Tissue == sc.TISSUE_KIDNEY then_x000D_
if isMale then_x000D_
Volume = (4.214 * WT ^ 0.823 + 4.456 * WT ^ 0.795) / 1000_x000D_
else_x000D_
Volume = (4.214 * WT ^ 0.823 + 4.456 * WT ^ 0.795) / 1000_x000D_
end_x000D_
_x000D_
elseif Tissue == sc.TISSUE_LIVER then_x000D_
if isMale then_x000D_
Volume = 0.722 * BSA ^ 1.176_x000D_
else_x000D_
Volume = 0.722 * BSA ^ 1.176_x000D_
end_x000D_
_x000D_
elseif Tissue == sc.TISSUE_LUNG then_x000D_
-- lung, excluding of blood_x000D_
if isMale then_x000D_
Volume = (9.899 * WT ^ 0.887) / 1000 / 1.05_x000D_
else_x000D_
Volume = (9.94 * WT ^ 0.884) / 1000 / 1.05_x000D_
end_x000D_
_x000D_
elseif Tissue == sc.TISSUE_MUSCLE then_x000D_
if isMale then_x000D_
Volume = (0.0084 * AGE + 0.317) * M_FFM / 1.04_x000D_
else_x000D_
Volume = (0.0066 * AGE + 0.296) * F_FFM / 1.04_x000D_
end_x000D_
_x000D_
elseif Tissue == sc.TISSUE_PANCREAS then_x000D_
if isMale then_x000D_
Volume = math.exp(-3.431 + 2.43 * math.log(HT/100)) / 1.05_x000D_
else_x000D_
Volume = math.exp(-3.431 + 2.43 * math.log (HT/100)) / 1.05_x000D_
end_x000D_
_x000D_
elseif Tissue == sc.TISSUE_SKIN then_x000D_
if isMale then_x000D_
Volume = BSA * (0.0012 * AGE ^ 2 + 0.017 * AGE + 0.6791) / 1.1_x000D_
else_x000D_
Volume = BSA * (0.0005 * AGE ^ 2 + 0.0202 * AGE + 0.682) / 1.1_x000D_
end_x000D_
_x000D_
elseif Tissue == sc.TISSUE_SPLEEN then_x000D_
if isMale then_x000D_
Volume = (0.0127 * (HT/100) * WT ^ 0.44 ) / 1.06_x000D_
else_x000D_
Volume = (0.0106 * (HT/100) ^ 0.97 * WT ^ 0.5 ) / 1.06_x000D_
end_x000D_
_x000D_
elseif Tissue == sc.TISSUE_BLOOD then_x000D_
if isMale then_x000D_
Volume = (1.628 * BSA) ^ 1.476_x000D_
else_x000D_
Volume = (1.614 * BSA) ^ 1.343_x000D_
end_x000D_
_x000D_
elseif Tissue == sc.TISSUE_YELLOW_MARROW then_x000D_
if isMale then_x000D_
Volume = 1.09e-5 * AGE * math.exp(math.log10(HT) * 4.0)_x000D_
else_x000D_
Volume = 3.8e-6 * AGE * math.exp(math.log10(HT) * 4.47)_x000D_
end_x000D_
end_x000D_
_x000D_
return Volume_x000D_
end_x000D_
Blood Flow Script
function DefineCardiacOutput(age, WT, BSA)_x000D_
_x000D_
CO = BSA * (110 + (184.974 * (math.exp(-0.0378 * age) - math.exp(-0.2477 * age))))_x000D_
return CO_x000D_
_x000D_
end_x000D_
_x000D_
_x000D_
_x000D_
function DefineTissueBF(Tissue, isMale, age) --Define tissue blood flow as percentage of cardiac output _x000D_
_x000D_
if Tissue == 68 then _x000D_
-- Adipose_x000D_
if isMale then_x000D_
BF = 5.00 -- this is 5% of cardiac output for male_x000D_
else_x000D_
BF = 5.00 + (3.59 * age^5.0/(14.49^5.0 + age^5.0)) -- female adipose blood flow_x000D_
end_x000D_
_x000D_
elseif Tissue == 78 then_x000D_
-- Lung_x000D_
BF = 100 _x000D_
_x000D_
elseif Tissue == 80 then_x000D_
-- Skin_x000D_
BF = 1.0335 + (4.0*age^5.0/(5.16^5.0 + age^5.0)) _x000D_
_x000D_
elseif Tissue == 75 then_x000D_
-- Kidney_x000D_
if isMale then_x000D_
BF = 4.53 + (14.63*age^1.0/(0.188^1.0 + age^1.0)) _x000D_
else_x000D_
BF = 4.53 + (13.00*age^1.15/(0.188^1.15 + age^1.15)) _x000D_
end_x000D_
_x000D_
elseif Tissue == 70 then _x000D_
-- Brain_x000D_
BF = 10 + 2290 *(math.exp(-0.608*age) - math.exp(-0.639*age))_x000D_
_x000D_
elseif Tissue == 79 then _x000D_
-- Muscle_x000D_
if isMale then_x000D_
BF = 6.03 + (12*age^2.5/(11^2.5 + age^2.5)) _x000D_
else_x000D_
BF = 6.03 + (7*age^2.5/(12^2.5 + age^2.5)) _x000D_
end_x000D_
_x000D_
elseif Tissue == 69 then _x000D_
-- Bone_x000D_
BF = 5.00 _x000D_
_x000D_
elseif Tissue == 71 then _x000D_
-- Stomach and Oesophagus_x000D_
BF = 1.00 _x000D_
_x000D_
elseif Tissue == 72 then _x000D_
-- Small Intestine_x000D_
if isMale then_x000D_
BF = 10.00 _x000D_
else_x000D_
BF = 11.00 _x000D_
end_x000D_
_x000D_
elseif Tissue == 73 then _x000D_
-- Large Intestine_x000D_
if isMale then_x000D_
BF = 4.00 _x000D_
else_x000D_
BF = 5.00 _x000D_
end_x000D_
_x000D_
elseif Tissue == 82 then_x000D_
-- Villi_x000D_
BF = 6.00 _x000D_
_x000D_
elseif Tissue == 81 then _x000D_
-- Spleen_x000D_
if isMale then_x000D_
BF = 2.00 _x000D_
else_x000D_
BF = 3.00 _x000D_
end_x000D_
_x000D_
elseif Tissue == 222 then _x000D_
-- Pancreas_x000D_
BF = 1.00 _x000D_
_x000D_
elseif Tissue == 76 then _x000D_
-- Liver arterial_x000D_
BF = 6.5_x000D_
_x000D_
elseif Tissue == 77 then _x000D_
-- Liver portal_x000D_
if isMale then_x000D_
BF = 19_x000D_
else_x000D_
BF = 21.5_x000D_
end_x000D_
_x000D_
elseif Tissue == 32 then _x000D_
-- Liver total_x000D_
if isMale then_x000D_
BF = 6.5 + 19_x000D_
else_x000D_
BF = 6.5 + 21.5_x000D_
end _x000D_
_x000D_
elseif Tissue == 74 then _x000D_
-- Heart_x000D_
if isMale then_x000D_
BF = 4.00 _x000D_
else_x000D_
BF = 5.00 _x000D_
end_x000D_
end_x000D_
_x000D_
return BF_x000D_
end _x000D_

## Sheet: Custom Dosing - Sub
Wsp-Propofol_retrograde_Cyp2B6 Dosing
Dose Number	Day	Time	Offset (h)	Dose	Dose Units	Route of Administration	Calculate AUC	Duration (h)
1	1	09:00:00	0	2	mg/kg	iv	No	0.005
2	1	09:01:00	0.0166667	2.25	mg/kg	iv	No	0.25
3	1	09:16:00	0.266667	3.5	mg/kg	iv	No	0.5
4	1	09:46:00	0.766667	6	mg/kg	iv	No	1
5	1	10:46:00	1.76667	10	mg/kg	iv	No	2

## Sheet: Demographic Data
				Statistics	Whole Population
					Age (Years)	Weight (kg)	Height (cm)	BSA (m²)	Brain Weight (g)	Kidney Weight (g)	Liver Weight (g)	BMI (kg/m²)	Cardiac Output (L/h)	Haematocrit (%)	HSA (g/L)	AGP (g/L)	Other (µM)	Serum Creatinine (µmol/L)	GFR (mL/min)	Renal Function	Allometric Scalar
				Mean	0.0431718	3.59208	53.6353	0.233367	512.329	25.5529	141.006	12.4812	26.0665	42.9023	36.6129	0.48037	0	n/a	4.94597	0.0397386	0.107547
				Median	0.0424261	3.51509	53.5126	0.230752	506.382	25.1608	139.001	12.4708	25.832	42.6316	36.3223	0.48261	0	n/a	4.62132	0.0374572	0.106079
				Geometric Mean	0.0361207	3.54425	53.5518	0.232167	506.812	25.3296	140.005	12.3588	25.9238	42.6511	36.4067	0.472116	n/a	n/a	4.28976	0.0344006	0.106738
				90% confidence interval around the geometric mean(lower limit)	0.0333904	3.47684	53.2033	0.22942	498.14	24.9392	138.058	12.1563	25.6073	42.1143	35.9548	0.4617	n/a	n/a	4.00467	0.0320961	0.105212
				90% confidence interval around the geometric mean(upper limit)	0.0390744	3.61297	53.9026	0.234948	515.636	25.7261	141.979	12.5647	26.2442	43.1948	36.8643	0.482766	n/a	n/a	4.59515	0.0368705	0.108287
				5th centile	0.00857545	2.73556	48.5893	0.197217	405.284	20.5424	115.562	9.92501	21.9035	35.4694	30.2914	0.336384	0	n/a	1.43067	0.0110052	0.0878943
				95th centile	0.0776329	4.56884	58.7871	0.272986	631.2	31.1051	169.38	15.3313	30.6022	51.2635	43.6331	0.610288	0	n/a	9.09484	0.0723597	0.129131
				Skewness	0.0873706	0.341767	0.355646	0.184942	0.292978	0.270842	0.225238	0.163247	0.196617	0.406396	0.1133	-0.150868	n/a	n/a	0.536613	0.568827	0.249139
				cv	0.507733	0.164455	0.0561695	0.101769	0.147637	0.132954	0.119682	0.140035	0.105028	0.109408	0.106137	0.180166	n/a	n/a	0.482629	0.485621	0.123264
				Min Val	0.00277908	2.3982	46.2936	0.181065	365.739	18.468	104.514	8.13576	20.0798	33.8875	27.5417	0.222449	0	n/a	0.5	0.00384615	0.0796326
				Max Val	0.0829893	5.57942	65.0873	0.304205	757.059	36.5622	192.382	17.1839	34.2654	57.5851	45.319	0.689775	0	n/a	13.5322	0.112768	0.150009
				Fold	29.8622	2.3265	1.40597	1.68009	2.06994	1.97976	1.84073	2.11215	1.70646	1.6993	1.64547	3.10082	n/a	n/a	27.0644	29.3198	1.88377
				Std Dev	0.0219197	0.590735	3.01267	0.0237496	75.6385	3.39735	16.8759	1.74781	2.73772	4.69384	3.88597	0.0865465	0	n/a	2.38707	0.0192979	0.0132566
Index	Population	Trial	Sex	Sex Code	Age (Years)	Weight (kg)	Height (cm)	BSA (m²)	Brain Weight (g)	Kidney Weight (g)	Liver Weight (g)	BMI (kg/m²)	Cardiac Output (L/h)	Haematocrit (%)	HSA (g/L)	AGP (g/L)	Other (µM)	Serum Creatinine (µmol/L)	GFR (mL/min)	Renal Function	Allometric Scalar	Simulation Duration
1	0	1	M	1	0.0468379	2.48197	48.3902	0.184136	379.571	18.988	106.602	10.5994	20.5876	37.1212	29.7622	0.449766	0	n/a	0.5	0.00384615	0.0817097	0.0532665
2	0	1	F	0	0.0260597	3.64571	55.0731	0.23835	512.594	25.9145	144.4	12.02	26.4588	51.8864	34.5199	0.459783	0	n/a	4.4783	0.0373192	0.109022	0.0541635
3	0	1	F	0	0.0808066	4.69665	56.9727	0.276831	643.032	31.8071	172.189	14.4696	31.31	39.4986	41.13	0.517677	0	n/a	13.5322	0.112768	0.131831	0.0558361
4	0	1	F	0	0.0192995	3.65006	52.0499	0.233225	535.623	25.9395	140.755	13.4729	25.829	40.5562	29.8929	0.42636	0	n/a	4.30611	0.0358842	0.109119	0.0490263
5	0	1	M	1	0.0686447	5.57942	57.2128	0.304205	757.059	36.5622	192.382	17.0452	34.2654	36.3421	32.9681	0.447046	0	n/a	10.1903	0.078387	0.150009	0.0617757
6	0	1	F	0	0.0379043	4.82382	52.9827	0.27287	698.544	32.502	169.295	17.1839	30.4151	49.2215	37.5629	0.422366	0	n/a	10.4079	0.0867323	0.134499	0.0773237
7	0	1	F	0	0.0724963	3.67881	49.6398	0.22985	558.815	26.1046	138.363	14.9296	25.9238	40.6378	39.274	0.675429	0	n/a	3.69927	0.0308272	0.109763	0.0494376
8	0	1	F	0	0.0425106	3.06512	51.7717	0.211864	451.574	22.522	125.72	11.4357	23.6527	39.0724	38.4121	0.537489	0	n/a	2.64285	0.0220238	0.0957221	0.05258
9	0	1	M	1	0.053582	4.56812	54.2733	0.267533	644.645	31.1011	165.408	15.5083	29.9809	38.4969	36.4052	0.467282	0	n/a	6.9628	0.05356	0.129116	0.050306
10	0	1	M	1	0.0398964	4.20786	52.1244	0.251904	611.31	29.1017	154.104	15.4874	28.0975	43.8082	39.6911	0.519999	0	n/a	6.29532	0.0484256	0.121401	0.0514707
11	0	1	F	0	0.0238442	3.35373	51.3782	0.221698	496.877	24.2224	132.61	12.7049	24.5913	47.1817	40.8996	0.419693	0	n/a	3.2195	0.0268291	0.102405	0.0769603
12	0	1	M	1	0.0688896	3.68715	62.1339	0.251549	468.977	26.1525	153.848	9.55066	28.3366	38.0413	36.1802	0.689775	0	n/a	8.36603	0.0643541	0.10995	0.0542308
13	0	1	F	0	0.0725953	4.15571	53.8936	0.253553	594.088	28.8096	155.291	14.3078	28.5981	40.8275	43.4809	0.556928	0	n/a	6.56779	0.0547316	0.120271	0.0530156
14	0	1	M	1	0.00706537	2.47957	48.837	0.184712	376.858	18.9732	106.994	10.3963	20.369	47.8198	37.5144	0.317695	0	n/a	0.5	0.00384615	0.0816505	0.0532455
15	0	1	F	0	0.0469213	3.4726	52.6584	0.228105	505.191	24.9145	137.128	12.5233	25.5043	41.6804	34.3686	0.463295	0	n/a	4.65467	0.0387889	0.105116	0.0549282
16	0	1	F	0	0.0180791	4.14723	55.5278	0.256292	579.398	28.762	157.265	13.4505	28.3715	48.3337	31.5325	0.442272	0	n/a	6.51528	0.054294	0.120087	0.0956759
17	0	1	F	0	0.0732517	3.87193	54.8228	0.245749	546.32	27.2076	149.686	12.8827	27.7241	39.1747	36.7057	0.531863	0	n/a	6.77524	0.0564604	0.114057	0.0669934
18	0	1	F	0	0.0225291	3.04584	51.1442	0.210128	452.774	22.4074	124.51	11.6443	23.2973	41.767	37.4645	0.518272	0	n/a	3.21013	0.0267511	0.0952702	0.0830601
19	0	1	F	0	0.0742899	4.34672	51.3023	0.254731	644.694	29.8761	156.14	16.5154	28.7474	37.2212	39.1349	0.473617	0	n/a	8.42118	0.0701765	0.124394	0.10687
20	0	1	M	1	0.0605936	3.48441	54.1906	0.231135	492.261	24.983	139.273	11.8654	25.9639	37.7061	27.927	0.472488	0	n/a	3.56837	0.027449	0.105384	0.050909
21	0	1	M	1	0.0364692	3.45413	53.0803	0.228172	495.346	24.8073	137.176	12.2595	25.4203	39.641	36.7744	0.503561	0	n/a	5.77606	0.0444313	0.104696	0.0515559
22	0	1	F	0	0.0641664	3.39264	51.0561	0.222522	504.963	24.4495	133.19	13.015	25.0268	44.3499	44.6436	0.44646	0	n/a	4.17005	0.0347504	0.103295	0.0830495
23	0	1	F	0	0.0829893	3.44354	52.4858	0.226781	502.194	24.7458	136.193	12.5004	25.668	34.371	37.3411	0.598266	0	n/a	4.61047	0.0384206	0.104455	0.0681116
24	0	1	F	0	0.0250908	2.95904	51.3473	0.207212	438.595	21.8895	122.48	11.2232	22.9944	51.0695	38.5785	0.425538	0	n/a	2.54324	0.0211936	0.0932265	0.0511527
25	0	1	F	0	0.0643943	4.03434	54.6862	0.250992	570.329	28.127	153.448	13.4901	28.2309	44.7647	43.7035	0.54715	0	n/a	5.25154	0.0437628	0.117627	0.0528274
26	0	1	F	0	0.0617524	4.12154	52.6522	0.250109	599.651	28.6178	152.813	14.8671	28.1064	42.0945	36.5989	0.565884	0	n/a	6.64831	0.0554025	0.119528	0.0538989
27	0	1	F	0	0.0127349	3.39937	55.6537	0.230505	474.079	24.4887	138.827	10.9751	25.4693	47.4712	35.5425	0.36668	0	n/a	4.33572	0.036131	0.103449	0.0521982
28	0	1	M	1	0.00858249	3.79851	51.9897	0.238169	552.851	26.7895	144.271	14.0533	26.2779	50.7794	33.3799	0.329855	0	n/a	5.31785	0.0409065	0.112431	0.0546914
29	0	1	M	1	0.0559427	2.96551	55.8587	0.214498	409.697	21.9282	127.56	9.50424	24.0569	43.0639	37.4422	0.371729	0	n/a	3.81603	0.0293541	0.0933794	0.0611614
30	0	1	F	0	0.0645561	3.69494	51.2204	0.233272	548.665	26.1971	140.789	14.0838	26.2393	38.0782	39.4591	0.496168	0	n/a	3.55585	0.0296321	0.110124	0.0908481
31	0	1	M	1	0.0472768	3.90465	54.6359	0.24653	548.341	27.3934	150.245	13.0805	27.5678	44.4564	34.6206	0.432227	0	n/a	6.15439	0.0473415	0.114779	0.0500437
32	0	1	M	1	0.0356985	3.29203	55.5709	0.226428	456.558	23.8613	135.943	10.6603	25.2193	44.019	39.663	0.44312	0	n/a	5.26417	0.0404936	0.100989	0.0481802
33	0	1	F	0	0.0101441	3.47095	51.4953	0.226036	513.384	24.9049	135.667	13.0892	24.9529	48.31	32.5189	0.278602	0	n/a	3.58963	0.0299136	0.105078	0.0560787
34	0	1	M	1	0.0212884	3.09261	55.8139	0.219324	427.511	22.6852	130.942	9.92749	24.3063	48.3148	39.0455	0.501717	0	n/a	3.05447	0.0234959	0.0963651	0.0539843
35	0	1	F	0	0.0791601	3.90033	54.9585	0.246959	549.277	27.3689	150.552	12.9131	27.916	40.6537	37.5343	0.488687	0	n/a	5.83284	0.048607	0.114684	0.0516315
36	0	1	M	1	0.0181814	4.29452	59.0046	0.26751	569.078	29.5855	165.392	12.3351	29.6145	43.7585	34.1912	0.430226	0	n/a	8.63755	0.0664427	0.123271	0.0485968
37	0	1	F	0	0.0785192	4.81571	56.7239	0.280096	661.625	32.4578	174.58	14.9668	31.655	34.8762	37.2448	0.59579	0	n/a	9.08576	0.0757147	0.13433	0.0496384
38	0	1	F	0	0.0685783	3.57018	54.4424	0.234608	506.447	25.4793	141.737	12.0452	26.4255	46.0439	36.1949	0.58742	0	n/a	4.38003	0.0365003	0.107323	0.0545067
39	0	1	M	1	0.0660194	2.77513	53.4302	0.203363	396.096	20.7824	119.809	9.72099	22.8864	42.455	33.459	0.48288	0	n/a	2.27184	0.0174757	0.0888463	0.0556926
40	0	1	M	1	0.0570483	3.58566	50.7068	0.228621	531.097	25.5687	137.493	13.9456	25.6506	35.4491	33.0228	0.555557	0	n/a	3.93847	0.0302959	0.107672	0.051092
41	0	1	F	0	0.0614791	3.702	50.4879	0.232182	555.516	26.2376	140.015	14.5232	26.0894	38.2708	38.5476	0.556775	0	n/a	4.51142	0.0375952	0.110282	0.050909
42	0	1	F	0	0.0134113	2.81625	49.9003	0.199499	426.188	21.0311	117.137	11.3101	22.0486	46.4331	31.61	0.339222	0	n/a	1.82114	0.0151761	0.0898318	0.0523325
43	0	1	M	1	0.0624946	2.7819	50.5039	0.199134	413.195	20.8234	116.884	10.9067	22.3836	40.0527	32.6649	0.681152	0	n/a	1.45145	0.011165	0.0890088	0.0538847
44	0	1	F	0	0.0253002	3.14592	52.0301	0.215274	461.773	23.001	128.103	11.6208	23.8909	48.2258	34.2913	0.478156	0	n/a	2.85092	0.0237577	0.0976083	0.0573026
45	0	1	F	0	0.0226982	3.62225	50.132	0.228836	546.336	25.7795	137.645	14.4128	25.373	47.294	31.8307	0.478159	0	n/a	4.0969	0.0341408	0.108495	0.0530709
46	0	1	F	0	0.0612174	3.7228	57.3205	0.2449	507.234	26.3568	149.077	11.3305	27.516	44.8881	35.976	0.605668	0	n/a	5.00401	0.0417001	0.110746	0.0480861
47	0	1	F	0	0.0255744	3.39462	55.0145	0.229279	477.683	24.461	137.959	11.216	25.4476	51.3145	37.1199	0.45056	0	n/a	5.97605	0.0498004	0.10334	0.0523365
48	0	1	M	1	0.0770847	4.30362	56.0795	0.262471	592.813	29.6362	161.734	13.6844	29.6488	39.9533	33.9752	0.476349	0	n/a	7.55826	0.0581405	0.123467	0.0541457
49	0	1	M	1	0.0232146	2.3982	48.5909	0.181065	365.739	18.468	104.514	10.1573	20.0798	41.9851	39.5618	0.500098	0	n/a	0.5	0.00384615	0.0796326	0.0509641
50	0	1	M	1	0.0302673	3.50601	49.5887	0.223888	527.349	25.1083	134.152	14.2577	24.8896	39.9408	29.4543	0.475904	0	n/a	4.65612	0.0358163	0.105873	0.0538903
51	0	1	M	1	0.0196249	3.15078	50.8014	0.213422	466.079	23.0298	126.808	12.2086	23.6386	53.0744	37.4756	0.37558	0	n/a	3.3666	0.0258969	0.0977215	0.0476748
52	0	1	F	0	0.0392265	3.17126	55.7021	0.22213	441.967	23.1508	132.914	10.2209	24.7707	41.9617	37.8843	0.555796	0	n/a	3.21041	0.0267534	0.0981975	0.0562213
53	0	1	M	1	0.0175456	3.1203	52.3484	0.214849	451.933	22.8494	127.805	11.3865	23.7793	46.1993	43.4387	0.353624	0	n/a	3.02934	0.0233026	0.0970117	0.0676273
54	0	1	F	0	0.041554	3.09614	53.3828	0.215618	445.822	22.7062	128.344	10.8647	24.0638	45.7232	35.8832	0.504996	0	n/a	3.18072	0.026506	0.0964478	0.0515185
55	0	1	M	1	0.0567982	2.94859	52.7492	0.209038	424.748	21.8269	123.75	10.597	23.4514	42.6309	39.6543	0.483542	0	n/a	2.79201	0.021477	0.0929795	0.0524201
56	0	1	M	1	0.0357082	2.66879	55.6838	0.202423	369.566	20.1359	119.158	8.60712	22.5457	42.6323	40.8619	0.454724	0	n/a	2.43151	0.0187039	0.0862805	0.0557262
57	0	1	M	1	0.0425336	3.09409	54.3439	0.217071	436.219	22.694	129.362	10.4769	24.2342	44.7138	35.2286	0.513144	0	n/a	3.26489	0.0251145	0.0963998	0.0557803
58	0	1	M	1	0.0723133	3.36203	55.3547	0.228651	467.614	24.2709	137.514	10.9722	25.787	35.1159	38.0476	0.494375	0	n/a	3.31434	0.0254949	0.102595	0.0508288
59	0	1	M	1	0.0286516	4.55627	55.8566	0.270222	629.484	31.0359	167.365	14.6036	30.0238	44.8703	45.0753	0.449717	0	n/a	8.96616	0.0689705	0.128865	0.0537132
60	0	1	M	1	0.0731493	3.88644	56.6453	0.249457	531.331	27.29	152.345	12.1122	28.1414	36.3473	33.8857	0.47459	0	n/a	6.76041	0.0520032	0.114377	0.048789
61	0	1	M	1	0.0706406	3.47157	60.6956	0.241278	449.927	24.9085	146.488	9.42348	27.1957	36.8899	35.4808	0.58178	0	n/a	5.00877	0.038529	0.105092	0.0509454
62	0	1	M	1	0.00656458	2.86819	49.2685	0.200455	433.326	21.3443	117.796	11.816	22.1011	57.5851	34.4225	0.336727	0	n/a	2.01517	0.0155013	0.0910716	0.0514153
63	0	1	F	0	0.0505261	2.70046	48.2624	0.192482	418.469	20.3289	112.306	11.5936	21.5479	41.7871	40.2196	0.534657	0	n/a	0.987059	0.00822549	0.0870472	0.0548586
64	0	1	M	1	0.0257562	2.76416	51.794	0.200444	403.381	20.7159	117.789	10.304	22.2486	44.6494	38.1458	0.412734	0	n/a	1.78752	0.0137501	0.0885827	0.0532795
65	0	1	M	1	0.0318236	3.42968	50.5902	0.223013	508.806	24.6651	133.536	13.4005	24.8058	45.272	41.7769	0.345831	0	n/a	3.33449	0.0256499	0.10414	0.0537551
66	0	1	F	0	0.0577772	3.60901	52.1234	0.23194	529.045	25.7032	139.844	13.2838	26.0294	40.6529	36.3918	0.446355	0	n/a	3.67629	0.0306357	0.108198	0.0556542
67	0	1	M	1	0.049437	3.12359	54.9635	0.219165	436.732	22.8689	130.83	10.3396	24.5259	41.3619	44.7436	0.408328	0	n/a	3.7183	0.0286023	0.0970884	0.0817747
68	0	1	F	0	0.0308253	4.08155	53.3204	0.250048	588.234	28.393	152.769	14.3562	27.8032	44.3575	44.7486	0.407797	0	n/a	8.64348	0.072029	0.118658	0.0514332
69	0	1	F	0	0.0496459	3.85624	52.3362	0.240742	563.578	27.1184	146.105	14.0786	26.9424	35.3798	32.8871	0.487994	0	n/a	5.69768	0.0474807	0.11371	0.0701688
70	0	1	M	1	0.0695013	4.43133	57.0058	0.268369	602.931	30.3456	166.016	13.6363	30.2376	37.4077	39.9752	0.494933	0	n/a	7.87907	0.0606082	0.126205	0.0628006
71	0	1	F	0	0.0456575	2.85572	49.7908	0.200823	432.843	21.2692	118.051	11.5191	22.4443	34.0059	34.7726	0.399067	0	n/a	1.82686	0.0152239	0.0907744	0.0543482
72	0	1	F	0	0.0438054	4.58261	52.4924	0.264468	668.249	31.1809	163.182	16.6311	29.5385	46.3614	38.4348	0.610214	0	n/a	8.24853	0.0687378	0.129423	0.0565297
73	0	1	F	0	0.0718011	3.39758	50.6762	0.222038	508.459	24.4783	132.85	13.2301	25.0369	42.7306	38.5782	0.524709	0	n/a	5.16224	0.0430187	0.103408	0.089473
74	0	1	M	1	0.0740153	4.11576	55.6067	0.255388	570.524	28.5853	156.613	13.3105	28.8188	34.8957	36.2434	0.459982	0	n/a	7.73424	0.0594942	0.119403	0.0629982
75	0	1	F	0	0.0295806	3.40188	52.0542	0.224565	499.173	24.5033	134.629	12.5547	24.959	45.5479	30.4914	0.468107	0	n/a	4.16188	0.0346823	0.103506	0.0611758
76	0	1	F	0	0.0632231	4.10816	51.7666	0.247998	605.284	28.5426	151.298	15.3302	27.8831	33.8875	30.7851	0.496887	0	n/a	5.34742	0.0445619	0.119237	0.0462814
77	0	1	F	0	0.0668353	4.0464	57.2448	0.255993	551.906	28.195	157.05	12.348	28.8172	39.9374	39.1912	0.490298	0	n/a	7.24036	0.0603363	0.11789	0.0535099
78	0	1	M	1	0.0429128	3.33639	54.9043	0.226975	466.855	24.1211	136.33	11.0679	25.3431	43.4894	36.5457	0.388492	0	n/a	4.51301	0.0347154	0.102008	0.0972523
79	0	1	F	0	0.0243705	3.64066	54.035	0.236383	519.42	25.8854	142.999	12.4689	26.225	41.6414	29.0253	0.395656	0	n/a	5.57612	0.0464677	0.108909	0.0520951
80	0	1	M	1	0.0776284	3.65846	52.3588	0.234061	529.804	25.9877	141.349	13.345	26.4444	42.2005	37.9384	0.554473	0	n/a	4.66037	0.035849	0.109308	0.0508934
81	0	1	F	0	0.0527991	4.29314	52.8808	0.256095	622.593	29.5778	157.124	15.3525	28.6916	41.6225	41.3602	0.461011	0	n/a	6.75567	0.0562972	0.123242	0.0566559
82	0	1	F	0	0.0559904	4.07153	54.9964	0.2528	573.081	28.3366	154.748	13.4613	28.3531	37.9756	35.7678	0.542333	0	n/a	6.03299	0.0502749	0.118439	0.0605363
83	0	1	M	1	0.0221582	3.10231	52.8001	0.214912	446.583	22.7428	127.85	11.128	23.8246	44.0816	36.5583	0.388566	0	n/a	3.02948	0.0233037	0.0965917	0.0535862
84	0	1	F	0	0.0266491	3.49564	48.977	0.222434	536.102	25.0481	133.128	14.5728	24.697	49.2357	31.0592	0.433813	0	n/a	3.41747	0.0284789	0.105638	0.0540918
85	0	1	M	1	0.0149568	3.34077	50.7002	0.220075	494.869	24.1467	131.469	12.9965	24.3358	50.7009	39.5099	0.40047	0	n/a	2.85031	0.0219255	0.102108	0.0507671
86	0	1	F	0	0.0806613	3.81009	53.4664	0.241223	547.978	26.8556	146.449	13.3283	27.2813	39.5187	35.1674	0.531566	0	n/a	4.75553	0.0396294	0.112688	0.0543925
87	0	1	F	0	0.0451258	3.93076	53.8251	0.245953	562.474	27.5415	149.831	13.5677	27.483	39.8742	33.7931	0.609442	0	n/a	6.91462	0.0576218	0.115354	0.056614
88	0	1	M	1	0.0234255	2.8525	53.7504	0.206883	405.384	21.2498	122.251	9.87331	22.9446	47.3586	31.3361	0.358812	0	n/a	2.47215	0.0190165	0.0906976	0.0497165
89	0	1	M	1	0.0818349	3.08062	52.5372	0.21368	445.045	22.6141	126.988	11.161	24.1758	40.8021	35.2584	0.603755	0	n/a	2.85506	0.021962	0.096085	0.0520937
90	0	1	M	1	0.0265089	2.91	52.5975	0.207326	420.052	21.5956	122.559	10.5187	23.0184	46.2028	36.2404	0.383372	0	n/a	3.38586	0.0260451	0.0920654	0.0548896
91	0	1	F	0	0.0368057	3.81313	51.6379	0.23802	562.848	26.8729	144.165	14.3003	26.5206	43.1993	34.4125	0.478387	0	n/a	5.9732	0.0497767	0.112755	0.0512946
92	0	1	F	0	0.0273715	3.6498	52.497	0.234008	532.189	25.938	141.311	13.2434	25.9885	41.9407	43.5805	0.437566	0	n/a	5.5843	0.0465358	0.109113	0.0489521
93	0	1	F	0	0.0580959	2.81102	49.6061	0.198833	427.204	20.9995	116.677	11.4234	22.3165	42.0062	35.1788	0.504258	0	n/a	1.54294	0.0128578	0.0897066	0.0606726
94	0	1	M	1	0.0738747	5.00692	55.803	0.284174	692.24	33.4964	177.573	16.0789	32.0657	42.7751	37.2772	0.520301	0	n/a	11.0715	0.0851651	0.13831	0.0640211
95	0	1	F	0	0.068324	4.15354	54.5083	0.254624	588.653	28.7974	156.063	13.9795	28.6776	39.0822	40.925	0.685523	0	n/a	7.33797	0.0611498	0.120224	0.120197
96	0	1	F	0	0.0386064	3.49204	55.4162	0.233467	488.628	25.0273	140.927	11.3712	26.0294	39.5947	34.7414	0.505163	0	n/a	4.0439	0.0336992	0.105557	0.054827
97	0	1	F	0	0.0268883	4.00235	52.3332	0.2456	584.956	27.9465	149.579	14.6137	27.2714	39.7241	36.2514	0.536406	0	n/a	9.26734	0.0772278	0.116927	0.0531607
98	0	1	M	1	0.0689873	3.70889	49.5762	0.230742	557.96	26.2771	138.994	15.0903	25.9936	40.8417	42.6833	0.571761	0	n/a	3.7986	0.02922	0.110436	0.0739293
99	0	1	M	1	0.0367888	3.06751	54.8551	0.21687	429.514	22.5362	129.22	10.1942	24.1638	44.9858	45.1898	0.454042	0	n/a	3.5325	0.027173	0.095778	0.0518896
100	0	1	F	0	0.00498648	3.01654	53.0534	0.212098	436.391	22.2329	125.883	10.7172	23.3718	52.0591	36.2896	0.322147	0	n/a	3.05093	0.0254245	0.0945819	0.0762305
101	0	1	F	0	0.0267323	4.1667	53.8702	0.25387	595.855	28.8712	155.519	14.358	28.1882	41.4445	30.3007	0.300148	0	n/a	5.67833	0.0473194	0.120509	0.0491715
102	0	1	M	1	0.0164268	3.84606	54.0642	0.243516	544.278	27.0604	148.087	13.1582	26.9417	45.1272	39.2697	0.373318	0	n/a	6.12353	0.0471041	0.113485	0.0530078
103	0	1	M	1	0.0675417	3.24339	51.9877	0.218765	472.07	23.5758	130.55	12.0005	24.6324	38.9119	36.6237	0.588698	0	n/a	3.24221	0.0249401	0.0998679	0.0489731
104	0	1	M	1	0.0717063	3.2705	55.1583	0.224965	456.081	23.735	134.911	10.7496	25.366	39.1187	41.4617	0.534952	0	n/a	4.81209	0.0370161	0.100493	0.0500129
105	0	1	F	0	0.0388001	3.91657	55.7218	0.248868	545.688	27.4611	151.922	12.6141	27.7484	44.5096	45.319	0.468546	0	n/a	4.98707	0.0415589	0.115042	0.0535439
106	0	1	F	0	0.0479412	3.14263	51.226	0.213829	466.615	22.9816	127.092	11.976	23.9165	42.4002	37.3537	0.589621	0	n/a	2.33115	0.0194262	0.0975317	0.0567601
107	0	1	M	1	0.0492811	3.20347	55.3734	0.222817	445.45	23.3408	133.397	10.4476	24.9332	41.2698	44.0556	0.570474	0	n/a	3.33414	0.0256473	0.0989446	0.0534626
108	0	1	M	1	0.0588525	3.39267	56.3441	0.231389	465.688	24.4497	139.453	10.6867	25.9771	37.9948	34.434	0.460165	0	n/a	4.98662	0.0383586	0.103296	0.0534637
109	0	1	F	0	0.0328598	4.24171	57.0255	0.262167	580.318	29.2909	161.513	13.0438	29.1713	44.1274	35.9872	0.510554	0	n/a	6.75449	0.0562874	0.122133	0.0485491
110	0	1	M	1	0.0377155	3.76757	51.5196	0.236272	551.873	26.6129	142.92	14.1944	26.334	41.6864	34.1959	0.462801	0	n/a	6.85822	0.0527556	0.111744	0.101042
111	0	1	F	0	0.0789863	4.0056	54.1971	0.24914	570.18	27.9649	152.117	13.6369	28.1608	35.4704	31.8452	0.547647	0	n/a	8.6188	0.0718233	0.116998	0.0535552
112	0	1	M	1	0.074563	3.49327	51.8025	0.227352	509.723	25.0344	136.596	13.0176	25.6599	43.1633	35.701	0.497851	0	n/a	4.30951	0.03315	0.105585	0.0528631
113	0	1	F	0	0.0770485	4.2942	58.6329	0.266831	574.513	29.5837	164.897	12.4911	30.1409	43.9647	36.5292	0.542248	0	n/a	6.06914	0.0505762	0.123265	0.113066
114	0	1	F	0	0.0359194	4.10876	57.2916	0.258191	560.047	28.546	158.637	12.5178	28.7593	45.6266	34.3	0.539887	0	n/a	7.27725	0.0606437	0.11925	0.0537829
115	0	1	M	1	0.0772701	3.23937	48.4996	0.212683	494.648	23.5521	126.292	13.7716	24.0262	36.7231	30.3173	0.564735	0	n/a	2.78692	0.0214379	0.099775	0.0569937
116	0	1	M	1	0.0212462	3.2463	52.9387	0.220449	466.434	23.5929	131.732	11.5836	24.4307	46.711	39.2447	0.406837	0	n/a	5.23768	0.0402898	0.0999351	0.0535036
117	0	1	F	0	0.00740757	3.52417	52.3877	0.229451	514.669	25.2134	138.08	12.841	25.3055	50.073	27.5422	0.348416	0	n/a	4.59214	0.0382678	0.106284	0.0545316
118	0	1	M	1	0.019085	4.04976	55.3124	0.252645	563.588	28.214	154.637	13.2368	27.9777	50.5301	35.4109	0.410659	0	n/a	5.81385	0.0447219	0.117964	0.0548187
119	0	1	F	0	0.0527836	2.77918	46.2936	0.192279	443.26	20.807	112.167	12.9681	21.5418	38.8771	37.0008	0.634612	0	n/a	1.09496	0.00912468	0.0889436	0.054525
120	0	1	M	1	0.0214069	3.12134	54.1072	0.21772	441.463	22.8556	129.817	10.6618	24.1296	42.9893	37.5379	0.444353	0	n/a	4.49375	0.0345673	0.0970358	0.0516395
121	0	1	F	0	0.0236967	2.69135	46.5655	0.189426	427.537	20.2735	110.212	12.412	21.0105	43.3928	38.4291	0.363884	0	n/a	0.872883	0.00727403	0.0868269	0.050177
122	0	1	M	1	0.0209162	3.79471	58.7757	0.249903	504.366	26.7678	152.666	10.9846	27.6917	44.9513	39.7613	0.48234	0	n/a	7.32816	0.0563705	0.112347	0.055734
123	0	1	F	0	0.0486568	3.0175	47.2712	0.202649	474.41	22.2386	119.314	13.5038	22.6716	36.9352	35.9657	0.602426	0	n/a	3.00658	0.0250549	0.0946045	0.0735142
124	0	1	M	1	0.0530947	4.44579	54.3949	0.26389	626.359	30.4257	162.762	15.0256	29.5678	35.0764	42.6456	0.574939	0	n/a	6.9408	0.0533907	0.126514	0.0690204
125	0	1	M	1	0.00971873	2.91141	53.8445	0.209315	413.231	21.604	123.943	10.042	23.1035	48.6583	38.2075	0.416236	0	n/a	3.37222	0.0259401	0.0920988	0.12484
126	0	1	M	1	0.017633	4.03211	54.0048	0.249673	571.064	28.1145	152.5	13.8251	27.6345	49.4144	41.4207	0.426804	0	n/a	6.40698	0.0492845	0.117578	0.0562978
127	0	1	M	1	0.0132521	3.66115	56.6438	0.24157	500.542	26.0032	146.697	11.4107	26.6968	46.6451	36.4619	0.406144	0	n/a	5.68491	0.0437301	0.109368	0.080743
128	0	1	M	1	0.0513052	3.77231	57.4072	0.246794	510.538	26.6399	150.434	11.4465	27.6353	40.9785	32.2112	0.512435	0	n/a	6.12058	0.0470814	0.111849	0.0522133
129	0	1	M	1	0.0472498	2.97228	54.045	0.211969	420.733	21.9687	125.793	10.176	23.7028	42.9281	41.5175	0.544469	0	n/a	3.30404	0.0254157	0.0935392	0.0494903
130	0	1	F	0	0.0338587	4.22497	56.5256	0.260698	582.074	29.1974	160.45	13.2231	29.0179	41.8782	44.8933	0.541562	0	n/a	7.61305	0.0634421	0.121771	0.0550593
131	0	1	M	1	0.0692396	4.22729	56.8428	0.261354	576.415	29.2103	160.925	13.0831	29.4447	41.6476	33.9813	0.471293	0	n/a	7.6763	0.0590484	0.121821	0.0533676
132	0	1	M	1	0.0114974	2.59107	52.3538	0.19442	375.254	19.6603	113.637	9.4533	21.4728	50.1394	38.9183	0.383025	0	n/a	1.44213	0.0110933	0.084389	0.0551455
133	0	1	M	1	0.053108	4.07812	55.3512	0.253666	567.241	28.3737	155.372	13.3109	28.4223	38.14	40.2201	0.611793	0	n/a	6.93591	0.0533531	0.118583	0.0541254
134	0	1	M	1	0.0183905	3.47171	54.2391	0.230763	490.148	24.9094	139.009	11.801	25.5483	45.6627	28.222	0.513395	0	n/a	4.61361	0.0354893	0.105096	0.0519021
135	0	1	M	1	0.019841	2.83579	51.8455	0.203301	413.544	21.1491	119.766	10.55	22.5193	51.2608	38.5145	0.41231	0	n/a	2.2281	0.0171392	0.0902989	0.0479619
136	0	1	M	1	0.0585383	4.81031	54.4523	0.275429	677.193	32.4283	171.164	16.2234	30.918	41.7034	30.5364	0.500949	0	n/a	9.53964	0.0733819	0.134217	0.0525742
137	0	1	F	0	0.0287194	3.19186	51.9046	0.216752	469.355	23.2723	129.138	11.8476	24.0834	45.2762	43.6294	0.439859	0	n/a	4.1939	0.0349492	0.0986754	0.0496123
138	0	1	F	0	0.0777181	3.55232	52.5752	0.230761	517.399	25.3761	139.008	12.8514	26.0724	42.2345	34.1867	0.561755	0	n/a	4.17383	0.0347819	0.10692	0.0636216
139	0	1	M	1	0.00277908	2.76925	50.7939	0.199098	409.683	20.7468	116.859	10.7334	21.9222	46.0477	38.1414	0.222449	0	n/a	1.74464	0.0134203	0.088705	0.0606021
140	0	1	F	0	0.00615556	3.35671	56.3375	0.230056	463.671	24.2398	138.509	10.5759	25.3611	55.4121	34.0934	0.311388	0	n/a	3.38553	0.0282128	0.102474	0.0511349
141	0	1	F	0	0.0553756	3.83397	52.0774	0.239522	562.39	26.9916	145.235	14.1368	26.8584	35.1529	36.9581	0.544231	0	n/a	5.86431	0.0488692	0.113217	0.0577296
142	0	1	M	1	0.0402876	2.86041	59.2946	0.215412	377.597	21.2974	128.2	8.13576	24.0304	42.1358	35.4938	0.638899	0	n/a	3.14435	0.0241873	0.0908861	0.0630191
143	0	1	F	0	0.0409818	3.40374	54.3441	0.228497	483.506	24.5142	137.406	11.5253	25.4962	43.9773	39.7754	0.515505	0	n/a	3.28482	0.0273735	0.103549	0.0895698
144	0	1	M	1	0.0453055	3.20103	54.7476	0.221724	448.857	23.3264	132.629	10.6797	24.7772	44.4615	43.3152	0.41378	0	n/a	3.75036	0.0288489	0.098888	0.0619549
145	0	1	F	0	0.0267756	2.91083	50.1287	0.203443	439.055	21.6006	119.864	11.5836	22.5894	46.4304	37.3628	0.483242	0	n/a	2.23495	0.0186246	0.0920851	0.0497798
146	0	1	F	0	0.00517572	3.34045	52.7002	0.223465	485.678	24.1448	133.854	12.0276	24.626	50.7472	34.0086	0.307975	0	n/a	3.51467	0.0292889	0.102101	0.0613786
147	0	1	M	1	0.0154093	2.85791	53.4086	0.206571	408.03	21.2824	122.034	10.019	22.8461	48.0898	31.2713	0.441287	0	n/a	2.43452	0.0187271	0.0908266	0.051966
148	0	1	F	0	0.072126	4.35444	53.575	0.259393	625.306	29.919	159.506	15.1708	29.2522	38.6701	32.5175	0.587721	0	n/a	6.48311	0.0540259	0.124559	0.0566809
149	0	1	M	1	0.0731757	4.64442	57.7602	0.276672	625.638	31.5207	172.073	13.9211	31.2118	37.6898	39.0003	0.568702	0	n/a	9.00109	0.0692391	0.13073	0.0588131
150	0	1	M	1	0.02765	4.08522	54.4832	0.252317	574.875	28.4136	154.401	13.7622	28.0247	51.3945	33.3382	0.419207	0	n/a	6.8345	0.0525731	0.118737	0.056688
151	0	1	F	0	0.00577783	2.67349	48.5587	0.191911	412.509	20.1646	111.914	11.3382	21.1532	54.7975	27.5417	0.286191	0	n/a	0.936833	0.00780694	0.0863942	0.049998
152	0	1	F	0	0.0423417	3.36467	52.8561	0.224597	488.118	24.2863	134.652	12.0435	25.0727	51.9435	36.2075	0.537636	0	n/a	4.12955	0.0344129	0.102656	0.0535365
153	0	1	F	0	0.0577509	4.206	54.8881	0.257055	592.911	29.0913	157.816	13.9609	28.8477	37.3718	40.7968	0.454606	0	n/a	6.90002	0.0575001	0.121361	0.0516085
154	0	1	F	0	0.0166036	3.25904	49.7904	0.21561	493.977	23.6677	128.338	13.1461	23.8557	43.3819	35.6811	0.379987	0	n/a	2.85032	0.0237527	0.100229	0.0495546
155	0	1	F	0	0.0237736	2.96311	52.0943	0.208556	434.543	21.9138	123.414	10.9186	23.133	43.0794	33.1657	0.389684	0	n/a	2.3205	0.0193375	0.0933228	0.0523735
156	0	1	F	0	0.0235804	3.25301	54.7011	0.223578	459.778	23.6323	133.934	10.8716	24.7976	38.9031	35.0049	0.389697	0	n/a	3.68135	0.0306779	0.10009	0.0530696
157	0	1	M	1	0.0492475	4.07611	59.4397	0.260864	537.053	28.3624	160.57	11.537	29.1904	38.2125	36.3551	0.446508	0	n/a	8.26522	0.0635786	0.118539	0.0531659
158	0	1	M	1	0.015165	2.73741	47.8697	0.193267	421.684	20.5536	112.845	11.9459	21.3729	42.8124	35.2595	0.47543	0	n/a	1.00743	0.00774946	0.0879389	0.0492776
159	0	1	M	1	0.0332007	2.65226	55.5544	0.201561	367.912	20.035	118.562	8.59368	22.4304	38.783	35.7464	0.514834	0	n/a	2.27715	0.0175165	0.0858793	0.0631747
160	0	1	M	1	0.0335706	3.18592	53.1282	0.218544	456.587	23.2373	130.394	11.2872	24.3233	43.0553	36.0688	0.382983	0	n/a	3.72445	0.0286496	0.0985378	0.057039
161	0	1	F	0	0.073205	4.4371	56.7725	0.268121	609.195	30.3776	165.836	13.7665	30.2475	36.1838	44.5077	0.611692	0	n/a	8.39343	0.0699453	0.126328	0.0497109
162	0	1	M	1	0.038695	3.27769	56.6503	0.227626	448.078	23.7773	136.79	10.2133	25.379	36.9151	30.0963	0.495062	0	n/a	4.18391	0.0321839	0.100659	0.0556569
163	0	1	M	1	0.0250437	3.93517	53.2018	0.244968	563.405	27.5665	149.126	13.9031	27.1838	45.3134	37.1239	0.495481	0	n/a	6.58693	0.0506687	0.115451	0.0564264
164	0	1	F	0	0.0757662	4.03366	52.6045	0.247138	587.262	28.1232	150.68	14.5765	27.9043	36.9095	40.6245	0.510074	0	n/a	4.79972	0.0399976	0.117612	0.0593912
165	0	1	F	0	0.0641605	4.91293	58.3197	0.286255	660.154	32.9868	179.103	14.4447	32.1946	38.3517	41.3897	0.511651	0	n/a	10.7555	0.0896291	0.136358	0.0546026
166	0	1	M	1	0.0306335	3.57787	53.5589	0.233361	509.784	25.5237	140.852	12.4727	25.946	46.7178	34.3591	0.384007	0	n/a	6.38891	0.0491455	0.107497	0.0532969
167	0	1	F	0	0.0225207	3.43382	54.8239	0.230382	484.496	24.6893	138.74	11.4245	25.5429	48.6421	34.4754	0.396013	0	n/a	3.46553	0.0288794	0.104234	0.0513883
168	0	1	F	0	0.0563346	3.44488	53.1936	0.228036	497.369	24.7535	137.079	12.1746	25.5787	38.7594	30.4698	0.49572	0	n/a	4.42989	0.0369157	0.104486	0.0497874
169	0	1	M	1	0.0244236	3.8852	61.7194	0.258042	496.845	27.283	158.529	10.1993	28.6284	51.0399	43.5587	0.458989	0	n/a	8.18558	0.062966	0.11435	0.0547846
170	0	1	F	0	0.0499895	3.8105	51.6482	0.237951	562.377	26.8579	144.115	14.2847	26.6332	44.4266	35.2585	0.508493	0	n/a	4.68925	0.0390771	0.112697	0.054016
171	0	1	M	1	0.0283728	4.42135	56.6221	0.267327	604.647	30.2903	165.259	13.7906	29.6993	40.7164	30.9378	0.35892	0	n/a	8.52749	0.0655961	0.125992	0.0504363
172	0	1	F	0	0.0446365	4.63865	58.1615	0.277247	624.669	31.489	172.494	13.7126	30.9746	40.048	39.7868	0.623622	0	n/a	9.40558	0.0783798	0.130608	0.0619447
173	0	1	F	0	0.0179673	2.90863	52.2946	0.206799	425.339	21.5874	122.193	10.6359	22.8918	46.2191	36.2676	0.387674	0	n/a	2.61379	0.0217816	0.0920329	0.0705904
174	0	1	M	1	0.047172	3.48858	53.8875	0.23077	494.866	25.0072	139.014	12.0136	25.8045	42.3156	30.1136	0.550346	0	n/a	5.08132	0.0390871	0.105478	0.0879213
175	0	1	M	1	0.0296166	3.50197	54.595	0.232444	492.061	25.0848	140.201	11.7491	25.835	39.4575	35.754	0.55014	0	n/a	6.41927	0.049379	0.105782	0.0511956
176	0	1	F	0	0.0383989	3.16747	51.1408	0.214595	470.877	23.1284	127.628	12.1109	23.9236	45.4328	37.1036	0.530519	0	n/a	3.43235	0.0286029	0.0981095	0.0524143
177	0	1	M	1	0.0627333	4.00007	56.4929	0.253083	547.975	27.9336	154.952	12.5337	28.4501	38.9821	38.9341	0.551284	0	n/a	6.97854	0.053681	0.116877	0.0520688
178	0	1	M	1	0.0724219	4.40307	53.1803	0.260183	630.577	30.189	160.077	15.5688	29.3443	40.8748	35.3617	0.569459	0	n/a	7.3079	0.0562146	0.125601	0.072988
179	0	1	M	1	0.0583657	3.10481	47.3675	0.205948	481.652	22.7576	121.602	13.838	23.1171	38.5081	37.4727	0.440214	0	n/a	2.82793	0.0217533	0.0966503	0.0550532
180	0	1	M	1	0.0485165	3.10768	50.4796	0.211314	461.737	22.7747	125.336	12.1957	23.6398	44.1009	37.5036	0.554238	0	n/a	3.28008	0.0252314	0.0967172	0.049467
181	0	1	M	1	0.0123305	3.04988	54.8513	0.216193	427.068	22.4314	128.746	10.137	23.8845	49.9097	35.9798	0.500482	0	n/a	3.17701	0.0244385	0.0953649	0.0602519
182	0	1	F	0	0.0740436	3.64495	50.6835	0.230604	545.421	25.9101	138.897	14.1892	26.0224	35.9128	39.4676	0.529174	0	n/a	4.62903	0.0385753	0.109005	0.0535224
183	0	1	F	0	0.080776	3.44958	52.7874	0.227511	500.924	24.7809	136.709	12.3796	25.7316	42.2315	33.647	0.557552	0	n/a	5.13898	0.0428248	0.104593	0.0492705
184	0	1	F	0	0.0343626	3.60171	49.1816	0.226413	550.737	25.6612	135.933	14.8903	25.206	43.8574	31.4441	0.588006	0	n/a	4.1719	0.0347658	0.108033	0.0553327
185	0	1	F	0	0.0443445	4.04262	54.0774	0.250156	576.424	28.1738	152.847	13.824	27.9451	44.536	36.2873	0.477019	0	n/a	6.67794	0.0556495	0.117808	0.0483149
186	0	1	F	0	0.00844166	3.84198	54.6408	0.244402	543.482	27.0372	148.721	12.8683	26.9643	49.4071	41.7355	0.346911	0	n/a	5.43362	0.0452802	0.113395	0.105216
187	0	1	F	0	0.0477196	3.62973	55.6381	0.238752	506.317	25.8225	144.686	11.7255	26.702	39.6026	32.6407	0.539016	0	n/a	4.78303	0.0398586	0.108663	0.0521419
188	0	1	M	1	0.0710412	4.42608	65.0873	0.28267	541.801	30.3165	176.468	10.4479	31.8655	38.1853	34.0376	0.580891	0	n/a	7.39279	0.0568676	0.126093	0.0603625
189	0	1	F	0	0.0552796	4.09352	55.5055	0.254461	572.073	28.4603	155.945	13.2869	28.5325	40.519	37.9666	0.546522	0	n/a	5.49827	0.0458189	0.118918	0.0572861
190	0	1	M	1	0.0138784	2.5661	50.9686	0.191365	378.722	19.5069	111.54	9.87798	21.153	46.9426	35.4076	0.386722	0	n/a	1.0415	0.00801155	0.0837782	0.0568436
191	0	1	M	1	0.0366863	2.82425	48.3774	0.197364	431.994	21.0794	115.664	12.0675	21.9897	43.6219	34.8175	0.396749	0	n/a	1.21303	0.00933101	0.0900232	0.126823
192	0	1	F	0	0.0346721	4.32795	59.6883	0.269858	570.63	29.7717	167.1	12.148	30.0459	46.1278	32.1453	0.564245	0	n/a	8.14227	0.0678523	0.12399	0.0625368
193	0	1	F	0	0.0486849	4.33412	58.7006	0.268285	579.31	29.806	165.955	12.5781	30.0149	46.7032	38.9728	0.542158	0	n/a	10.0964	0.084137	0.124123	0.0621685
194	0	1	M	1	0.0309984	4.49129	59.637	0.275195	590.224	30.6774	170.993	12.6281	30.6012	41.9636	34.7527	0.457903	0	n/a	9.39977	0.0723059	0.127484	0.0505511
195	0	1	F	0	0.00668983	2.82854	51.7715	0.202906	416.719	21.1053	119.493	10.5531	22.3724	51.5882	33.2794	0.279902	0	n/a	1.79179	0.0149316	0.0901255	0.0546343
196	0	1	F	0	0.0810938	4.5451	56.3067	0.270726	628.097	30.9743	167.732	14.3359	30.6224	35.7017	39.3313	0.559703	0	n/a	7.80238	0.0650199	0.128628	0.0495813
197	0	1	F	0	0.0274071	3.2029	52.1054	0.217487	469.634	23.3374	129.653	11.7972	24.1541	42.6627	34.6246	0.47626	0	n/a	3.70674	0.0308895	0.0989314	0.0785382
198	0	1	F	0	0.0348123	3.94793	52.2799	0.2437	577.439	27.6387	148.219	14.4444	27.1348	42.8346	41.8359	0.440893	0	n/a	5.88791	0.0490659	0.115732	0.042254
199	0	1	M	1	0.0504319	3.62763	59.0309	0.244344	480.541	25.8105	148.679	10.4103	27.3529	42.7456	35.8523	0.449212	0	n/a	4.95052	0.0380809	0.108616	0.0453979
200	0	1	F	0	0.0517681	4.18032	54.8775	0.25619	589.377	28.9475	157.192	13.881	28.6921	39.644	34.3718	0.664497	0	n/a	5.20008	0.043334	0.120805	0.0448754

## Sheet: Substrate Clearance Values
Statistics
		CL	CLh	CLr	CLmr	CLadd		CLb	CLh,b	CLr,b	CLmr,b	CLAdd,b
Mean		2.91038	2.28659	0	0.62379	0		2.01767	1.58225	0	0.435418	0
Median		2.68057	1.96236	0	0.57066	0		1.90279	1.4118	0	0.400624	0
Geometric Mean		2.62731	1.98516	n/a	0.509524	n/a		1.82698	1.38044	n/a	0.354313	n/a
90% confidence interval around the geometric mean(lower limit)		2.49056	1.86465	n/a	0.468128	n/a		1.73325	1.29805	n/a	0.325224	n/a
90% confidence interval around the geometric mean(upper limit)		2.77157	2.11346	n/a	0.554581	n/a		1.92578	1.46807	n/a	0.386003	n/a
5th centile		1.1847	0.822785	0	0.157918	0		0.874195	0.580409	0	0.0983566	0
95th centile		5.54735	4.60847	0	1.32569	0		3.78388	3.15216	0	0.915156	0
Skewness		1.46915	1.73186	n/a	0.94957	n/a		1.27771	1.56093	n/a	0.998038	n/a
cv		0.47242	0.565996	n/a	0.574079	n/a		0.461325	0.551398	n/a	0.581544	n/a
Min Val		0.51951	0.397283	0	0.0200875	0		0.377831	0.288937	0	0.0138202	0
Max Val		9.49496	9.09644	0	1.96262	0		5.95872	5.70862	0	1.38398	0
Fold		18.2767	22.8966	n/a	97.7036	n/a		15.7709	19.7573	n/a	100.142	n/a
Std Dev		1.37492	1.2942	0	0.358105	0		0.930799	0.872449	0	0.253215	0
		Plasma						Blood
Index	Trial	CL	CLh	CLr	CLmr	CLadd		CLb	CLh,b	CLr,b	CLmr,b	CLAdd,b
1	1	1.55209	1.13639	0	0.415696	0		0.959048	0.702186	0	0.256862	0
2	1	4.20012	3.92968	0	0.270436	0		2.83466	2.65214	0	0.182517	0
3	1	2.77418	1.24789	0	1.52629	0		2.06858	0.930494	0	1.13808	0
4	1	3.37155	2.62629	0	0.745264	0		2.08884	1.62711	0	0.461728	0
5	1	5.27568	3.91074	0	1.36494	0		3.46567	2.56903	0	0.896649	0
6	1	3.39149	2.36982	0	1.02167	0		2.4032	1.67925	0	0.723955	0
7	1	2.86517	2.22933	0	0.635833	0		2.08208	1.62003	0	0.462052	0
8	1	1.79379	1.22926	0	0.564528	0		1.28731	0.882178	0	0.405133	0
9	1	3.20666	2.54225	0	0.664414	0		2.23188	1.76944	0	0.462442	0
10	1	2.65195	2.23409	0	0.417865	0		1.9386	1.63313	0	0.305462	0
11	1	2.67334	2.00643	0	0.666909	0		1.98719	1.49145	0	0.495737	0
12	1	5.78825	4.82214	0	0.966107	0		4.01436	3.34433	0	0.670029	0
13	1	4.07512	3.64873	0	0.426392	0		3.13276	2.80497	0	0.32779	0
14	1	5.757	5.55758	0	0.199423	0		4.07639	3.93519	0	0.141206	0
15	1	2.81631	2.3064	0	0.509901	0		1.89586	1.55261	0	0.343251	0
16	1	3.16923	2.47398	0	0.695242	0		2.02756	1.58277	0	0.444792	0
17	1	2.78338	2.04615	0	0.737226	0		1.94643	1.43089	0	0.515547	0
18	1	1.69733	1.46766	0	0.229664	0		1.20092	1.03843	0	0.162496	0
19	1	5.33086	3.87748	0	1.45337	0		3.86614	2.8121	0	1.05404	0
20	1	3.53759	3.01617	0	0.521419	0		2.10266	1.79274	0	0.309919	0
21	1	2.08417	1.45045	0	0.633719	0		1.45904	1.0154	0	0.44364	0
22	1	4.13136	3.11522	0	1.01614	0		3.22169	2.42929	0	0.792399	0
23	1	1.87577	1.441	0	0.43477	0		1.32468	1.01765	0	0.307038	0
24	1	1.18472	1.10052	0	0.0842046	0		0.852296	0.791719	0	0.0605772	0
25	1	3.31628	1.99121	0	1.32507	0		2.55648	1.535	0	1.02148	0
26	1	6.11501	5.57661	0	0.538402	0		4.26913	3.89325	0	0.375879	0
27	1	1.05117	0.807409	0	0.243762	0		0.721577	0.554246	0	0.16733	0
28	1	2.73402	1.93099	0	0.803033	0		1.80922	1.27782	0	0.531401	0
29	1	1.43348	1.29407	0	0.139411	0		1.0139	0.915291	0	0.098605	0
30	1	4.82727	4.1746	0	0.652675	0		3.51719	3.04165	0	0.475545	0
31	1	3.67209	2.90348	0	0.768608	0		2.48251	1.96289	0	0.519616	0
32	1	1.1843	0.773478	0	0.410825	0		0.865391	0.565194	0	0.300197	0
33	1	3.5583	2.80108	0	0.757218	0		2.3186	1.82519	0	0.493406	0
34	1	1.6019	1.20172	0	0.400178	0		1.16027	0.870415	0	0.289851	0
35	1	3.48783	3.04732	0	0.440509	0		2.4704	2.15839	0	0.312008	0
36	1	1.4647	1.13375	0	0.330959	0		0.983017	0.760898	0	0.222119	0
37	1	3.68416	1.72154	0	1.96262	0		2.59795	1.21398	0	1.38398	0
38	1	2.67608	2.02151	0	0.654572	0		1.85639	1.40231	0	0.454075	0
39	1	2.90544	1.94091	0	0.964528	0		1.92533	1.28617	0	0.639159	0
40	1	1.73348	1.08803	0	0.645446	0		1.13986	0.715443	0	0.424419	0
41	1	4.72164	3.10211	0	1.61953	0		3.39524	2.23067	0	1.16457	0
42	1	1.8816	1.43179	0	0.449802	0		1.20555	0.917357	0	0.288191	0
43	1	1.84555	1.22206	0	0.623483	0		1.20576	0.798418	0	0.407343	0
44	1	4.98768	4.22392	0	0.763759	0		3.35315	2.83968	0	0.513465	0
45	1	3.13343	3.08915	0	0.0442815	0		2.01595	1.98746	0	0.0284894	0
46	1	2.4517	1.73902	0	0.712687	0		1.6948	1.20214	0	0.492663	0
47	1	2.06825	1.46143	0	0.60682	0		1.45567	1.02858	0	0.427089	0
48	1	2.23706	1.95045	0	0.286611	0		1.49582	1.30417	0	0.191643	0
49	1	1.03595	0.603466	0	0.432485	0		0.755904	0.440332	0	0.315572	0
50	1	2.67085	1.75022	0	0.920631	0		1.63997	1.07468	0	0.565288	0
51	1	2.3329	1.81427	0	0.518631	0		1.65089	1.28388	0	0.367013	0
52	1	0.768336	0.537649	0	0.230687	0		0.547087	0.382828	0	0.164259	0
53	1	3.55873	3.3898	0	0.168934	0		2.73433	2.60453	0	0.1298	0
54	1	1.42016	1.12352	0	0.296639	0		0.980259	0.775506	0	0.204754	0
55	1	2.05415	1.27299	0	0.781163	0		1.50082	0.930081	0	0.570739	0
56	1	2.46732	2.16296	0	0.304365	0		1.83311	1.60698	0	0.226129	0
57	1	2.5674	2.20986	0	0.357541	0		1.75336	1.50918	0	0.244175	0
58	1	2.54412	2.26099	0	0.283127	0		1.81594	1.61385	0	0.202091	0
59	1	1.41616	1.14347	0	0.272693	0		1.11007	0.89632	0	0.213752	0
60	1	2.79197	2.71779	0	0.0741844	0		1.86397	1.81444	0	0.0495268	0
61	1	5.53164	4.59188	0	0.93976	0		3.79337	3.14892	0	0.644449	0
62	1	2.0461	1.73766	0	0.308442	0		1.37864	1.17081	0	0.207824	0
63	1	5.09463	4.43998	0	0.654647	0		3.75186	3.26975	0	0.482104	0
64	1	1.13825	0.761006	0	0.377242	0		0.813649	0.543987	0	0.269662	0
65	1	4.58978	3.98363	0	0.606154	0		3.45203	2.99613	0	0.455895	0
66	1	1.46761	1.39075	0	0.0768636	0		1.02126	0.967776	0	0.0534868	0
67	1	2.71357	1.94365	0	0.769926	0		2.11863	1.51751	0	0.601121	0
68	1	3.99403	3.33381	0	0.660224	0		3.11854	2.60303	0	0.515502	0
69	1	2.42969	1.84608	0	0.583606	0		1.59378	1.21096	0	0.382822	0
70	1	3.70262	2.8977	0	0.80492	0		2.71747	2.12671	0	0.590756	0
71	1	3.16665	2.30023	0	0.866415	0		2.14628	1.55904	0	0.587236	0
72	1	2.29382	0.985175	0	1.30865	0		1.64671	0.707247	0	0.939465	0
73	1	2.73623	1.78595	0	0.950274	0		1.96845	1.28482	0	0.68363	0
74	1	2.49636	1.51172	0	0.984636	0		1.73305	1.04949	0	0.683567	0
75	1	1.65431	1.12659	0	0.527715	0		1.03726	0.706383	0	0.330882	0
76	1	4.8335	4.49033	0	0.343168	0		3.04818	2.83176	0	0.216414	0
77	1	1.60078	1.13751	0	0.463265	0		1.16189	0.825636	0	0.33625	0
78	1	6.31121	5.16894	0	1.14228	0		4.40242	3.60562	0	0.796801	0
79	1	3.44032	2.79294	0	0.647388	0		2.09367	1.69969	0	0.39398	0
80	1	1.70102	1.16232	0	0.538702	0		1.21218	0.828289	0	0.383889	0
81	1	2.87645	1.94623	0	0.930219	0		2.15147	1.4557	0	0.695767	0
82	1	4.91452	3.18547	0	1.72904	0		3.38592	2.19468	0	1.19125	0
83	1	1.92453	1.59682	0	0.327709	0		1.34274	1.11409	0	0.228641	0
84	1	3.84398	3.79047	0	0.053511	0		2.43709	2.40316	0	0.033926	0
85	1	1.84133	1.35135	0	0.489983	0		1.34258	0.985316	0	0.357264	0
86	1	1.98559	1.00712	0	0.978474	0		1.35465	0.687096	0	0.667555	0
87	1	2.21068	1.94682	0	0.263863	0		1.47352	1.29765	0	0.175877	0
88	1	2.33838	1.9853	0	0.353084	0		1.49044	1.26539	0	0.225049	0
89	1	3.22562	2.32606	0	0.899565	0		2.20395	1.58931	0	0.614641	0
90	1	3.22839	2.87901	0	0.349379	0		2.24115	1.99861	0	0.242539	0
91	1	1.88482	0.844416	0	1.0404	0		1.26975	0.56886	0	0.700891	0
92	1	1.6199	0.823595	0	0.796304	0		1.24685	0.633927	0	0.612922	0
93	1	1.59335	1.0278	0	0.565551	0		1.08725	0.701337	0	0.385915	0
94	1	2.83009	1.7781	0	1.05199	0		1.99668	1.25448	0	0.742202	0
95	1	2.53523	1.77129	0	0.76394	0		1.88518	1.31712	0	0.568059	0
96	1	1.90664	1.58024	0	0.326396	0		1.2916	1.07049	0	0.221107	0
97	1	3.69167	3.10965	0	0.582029	0		2.56321	2.15909	0	0.404115	0
98	1	2.95386	1.90194	0	1.05192	0		2.24797	1.44743	0	0.800541	0
99	1	1.10962	0.794971	0	0.314649	0		0.870971	0.623994	0	0.246977	0
100	1	1.65812	1.33199	0	0.326135	0		1.15197	0.925388	0	0.226579	0
101	1	3.55119	3.1337	0	0.417492	0		2.21823	1.95744	0	0.260783	0
102	1	1.6926	1.13834	0	0.554267	0		1.22992	0.827163	0	0.402753	0
103	1	1.29751	0.85425	0	0.443257	0		0.906192	0.596617	0	0.309575	0
104	1	2.64792	2.33629	0	0.311629	0		1.98322	1.74982	0	0.233402	0
105	1	3.55806	3.0095	0	0.548561	0		2.7971	2.36586	0	0.43124	0
106	1	3.78576	3.5532	0	0.232559	0		2.67405	2.50978	0	0.164267	0
107	1	1.99047	1.41388	0	0.576583	0		1.54111	1.0947	0	0.446418	0
108	1	5.614	4.76848	0	0.845526	0		3.78338	3.21357	0	0.569816	0
109	1	1.57797	1.01314	0	0.564839	0		1.09101	0.700482	0	0.39053	0
110	1	3.31588	3.25219	0	0.0636872	0		2.22558	2.18284	0	0.0427462	0
111	1	2.45056	1.91169	0	0.538877	0		1.57705	1.23025	0	0.346791	0
112	1	4.62309	4.05941	0	0.563681	0		3.1817	2.79376	0	0.387936	0
113	1	7.49692	7.31386	0	0.183061	0		5.22817	5.1005	0	0.127662	0
114	1	2.92979	2.58624	0	0.343549	0		1.96995	1.73895	0	0.230997	0
115	1	3.45913	2.82138	0	0.637746	0		2.16144	1.76294	0	0.398495	0
116	1	3.48637	3.26047	0	0.225909	0		2.53244	2.36834	0	0.164096	0
117	1	5.59073	4.60004	0	0.990691	0		3.29476	2.71092	0	0.583839	0
118	1	3.48983	2.51063	0	0.979206	0		2.39045	1.71972	0	0.670734	0
119	1	2.76945	1.84206	0	0.927393	0		1.94561	1.29409	0	0.651515	0
120	1	1.90673	1.00102	0	0.905713	0		1.35059	0.709048	0	0.641542	0
121	1	1.24633	0.542744	0	0.703587	0		0.894653	0.389598	0	0.505056	0
122	1	2.36295	2.0642	0	0.29875	0		1.72905	1.51044	0	0.218605	0
123	1	1.82323	1.19121	0	0.632023	0		1.26015	0.823319	0	0.43683	0
124	1	1.88899	1.08673	0	0.802262	0		1.43688	0.826628	0	0.610248	0
125	1	2.52188	2.07458	0	0.447298	0		1.80436	1.48433	0	0.320034	0
126	1	3.36063	2.79277	0	0.567852	0		2.51565	2.09057	0	0.425074	0
127	1	1.61723	0.834032	0	0.783193	0		1.12662	0.581017	0	0.545601	0
128	1	2.15999	1.71519	0	0.444798	0		1.39953	1.11133	0	0.288201	0
129	1	1.98285	1.45875	0	0.524095	0		1.4862	1.09338	0	0.392826	0
130	1	4.23854	3.08838	0	1.15016	0		3.3152	2.41559	0	0.899605	0
131	1	2.28753	1.35963	0	0.927897	0		1.52972	0.909215	0	0.620504	0
132	1	3.51798	3.14004	0	0.377934	0		2.54341	2.27017	0	0.273237	0
133	1	3.1407	2.22003	0	0.920679	0		2.31293	1.63491	0	0.678023	0
134	1	2.41551	1.80459	0	0.610923	0		1.44501	1.07954	0	0.365467	0
135	1	1.68723	1.24942	0	0.437805	0		1.21266	0.898	0	0.314664	0
136	1	9.49496	9.09644	0	0.398522	0		5.95872	5.70862	0	0.250099	0
137	1	1.54895	1.16258	0	0.386373	0		1.19297	0.895394	0	0.297576	0
138	1	4.282	3.61571	0	0.666293	0		2.87358	2.42645	0	0.447139	0
139	1	1.1207	0.851635	0	0.269067	0		0.801056	0.608732	0	0.192324	0
140	1	1.62382	1.38852	0	0.235298	0		1.08798	0.930325	0	0.157653	0
141	1	2.86266	2.05327	0	0.80939	0		2.00975	1.44151	0	0.568239	0
142	1	1.9239	1.57075	0	0.353156	0		1.31962	1.07738	0	0.242232	0
143	1	2.60934	1.72577	0	0.883571	0		1.90972	1.26305	0	0.646666	0
144	1	2.00127	1.76315	0	0.238125	0		1.53529	1.35261	0	0.182679	0
145	1	2.483	2.10632	0	0.37668	0		1.75409	1.48799	0	0.266103	0
146	1	1.44395	1.23371	0	0.210234	0		0.966053	0.825399	0	0.140654	0
147	1	3.65671	2.95644	0	0.700268	0		2.32782	1.88204	0	0.445784	0
148	1	3.94062	2.32642	0	1.6142	0		2.56766	1.51586	0	1.05179	0
149	1	1.53533	1.34976	0	0.185569	0		1.11132	0.976998	0	0.134321	0
150	1	2.98202	1.97426	0	1.00775	0		1.97188	1.30549	0	0.666383	0
151	1	3.04915	2.89026	0	0.158892	0		1.79692	1.70328	0	0.0936378	0
152	1	4.05148	3.10226	0	0.949221	0		2.81107	2.15246	0	0.658605	0
153	1	2.991	2.34851	0	0.642486	0		2.22021	1.74329	0	0.476916	0
154	1	2.10313	2.08304	0	0.0200875	0		1.44695	1.43313	0	0.0138202	0
155	1	3.2758	2.75589	0	0.519911	0		2.15953	1.81678	0	0.342744	0
156	1	3.20154	2.99022	0	0.211321	0		2.17835	2.03457	0	0.143784	0
157	1	3.18871	1.91095	0	1.27777	0		2.21763	1.32899	0	0.88864	0
158	1	2.05206	1.5667	0	0.485359	0		1.40212	1.07049	0	0.331635	0
159	1	3.10254	2.60868	0	0.493855	0		2.13679	1.79666	0	0.34013	0
160	1	3.21791	2.55688	0	0.661022	0		2.22777	1.77014	0	0.457628	0
161	1	3.56256	2.78159	0	0.780972	0		2.77357	2.16556	0	0.608011	0
162	1	5.54621	4.85913	0	0.68708	0		3.45027	3.02284	0	0.427429	0
163	1	2.07221	1.70734	0	0.36487	0		1.45854	1.20173	0	0.256817	0
164	1	2.68506	1.7598	0	0.925261	0		1.98843	1.30323	0	0.685205	0
165	1	4.0099	3.09508	0	0.914811	0		3.00043	2.31591	0	0.684513	0
166	1	2.15782	1.70343	0	0.454397	0		1.45235	1.14651	0	0.305837	0
167	1	1.67301	0.769055	0	0.903957	0		1.12827	0.518645	0	0.609622	0
168	1	3.78233	2.8648	0	0.917535	0		2.37055	1.79549	0	0.575058	0
169	1	1.13628	0.66076	0	0.475519	0		0.874365	0.508454	0	0.365911	0
170	1	2.86303	1.52551	0	1.33751	0		1.95621	1.04233	0	0.913877	0
171	1	3.61381	3.58257	0	0.0312433	0		2.28578	2.26602	0	0.0197618	0
172	1	4.11518	2.38131	0	1.73386	0		3.01229	1.74311	0	1.26918	0
173	1	1.67048	1.46665	0	0.203835	0		1.16015	1.01859	0	0.141563	0
174	1	3.56516	2.4491	0	1.11606	0		2.21864	1.5241	0	0.694537	0
175	1	2.10799	1.7265	0	0.381492	0		1.452	1.18923	0	0.262775	0
176	1	1.93161	1.45723	0	0.47438	0		1.35916	1.02537	0	0.333793	0
177	1	5.56909	5.27145	0	0.297638	0		4.02724	3.812	0	0.215234	0
178	1	2.29261	1.59799	0	0.694621	0		1.56912	1.0937	0	0.475416	0
179	1	2.58942	1.81281	0	0.776604	0		1.83234	1.2828	0	0.549546	0
180	1	2.33115	1.80401	0	0.527143	0		1.65036	1.27716	0	0.373196	0
181	1	3.55121	3.14598	0	0.405226	0		2.45501	2.17487	0	0.28014	0
182	1	2.19703	1.64399	0	0.553043	0		1.60097	1.19797	0	0.403001	0
183	1	3.11485	2.27631	0	0.838541	0		2.07092	1.51341	0	0.557506	0
184	1	4.61152	3.73612	0	0.875398	0		2.94535	2.38624	0	0.55911	0
185	1	2.32618	2.04585	0	0.28033	0		1.61603	1.42128	0	0.19475	0
186	1	3.42349	2.28293	0	1.14055	0		2.57343	1.71608	0	0.857352	0
187	1	2.29126	1.51884	0	0.772422	0		1.4963	0.991875	0	0.504429	0
188	1	2.16592	1.4414	0	0.724522	0		1.44981	0.964832	0	0.484973	0
189	1	2.91336	2.24532	0	0.668041	0		2.07699	1.60073	0	0.476259	0
190	1	3.0276	2.37408	0	0.653527	0		2.07372	1.6261	0	0.447626	0
191	1	1.95487	1.3814	0	0.573467	0		1.32596	0.936983	0	0.388974	0
192	1	8.8412	7.33783	0	1.50338	0		5.72157	4.74866	0	0.972907	0
193	1	1.82225	1.0245	0	0.79775	0		1.31848	0.741271	0	0.577208	0
194	1	3.57167	3.03314	0	0.538532	0		2.41998	2.0551	0	0.364882	0
195	1	1.11421	0.891365	0	0.22285	0		0.736015	0.588808	0	0.147208	0
196	1	0.51951	0.397283	0	0.122227	0		0.377831	0.288937	0	0.0888939	0
197	1	4.31332	3.83247	0	0.480849	0		2.91621	2.59111	0	0.325099	0
198	1	2.25186	1.64222	0	0.609638	0		1.69497	1.2361	0	0.458872	0
199	1	4.7594	3.91216	0	0.847242	0		3.28352	2.69901	0	0.584514	0
200	1	1.29881	1.12075	0	0.178055	0		0.874365	0.754497	0	0.119868	0

## Sheet: % fm and fe SS
		% fm and fe of CYPs, UGTs, cytosolic enzymes, esterases, additional metabolic clearances, biliary, renal and additional systemic clearances
		% contribution in absence of inhibitor(s)
Index	Trial	CYP2B6 Liver	CYP2C9 Liver	UGT1A9 Liver	UGT1A9 Kidney	Renal		Statistics	% contribution in absence of inhibitor(s)
1	1	46.1901	8.1417	18.8852	26.783	0			CYP2B6 Liver	CYP2C9 Liver	UGT1A9 Liver	UGT1A9 Kidney	Renal
2	1	81.0946	7.87363	4.59298	6.43877	0		Mean	47.9053	12.3448	16.3461	23.4038	0
3	1	12.4209	6.23044	26.331	55.0177	0		Median	49.0417	11.1809	15.4093	22.4134	0
4	1	56.5241	7.99539	13.376	22.1045	0		Geometric Mean	41.0703	9.81768	13.0195	19.3934	n/a
5	1	32.6669	19.8406	21.6202	25.8723	0		90% confidence interval around the geometric mean(lower limit)	37.994	9.00089	11.8823	17.8193	n/a
6	1	31.0248	20.298	18.5526	30.1246	0		90% confidence interval around the geometric mean(upper limit)	44.3956	10.7086	14.2654	21.1065	n/a
7	1	30.8489	15.3742	31.5851	22.1919	0		5th centile	14.0592	2.82099	3.57076	5.18783	0
8	1	37.0324	10.2542	21.2421	31.4713	0		95th centile	83.0337	28.2436	34.9291	46.756	0
9	1	26.3095	13.2774	39.6933	20.7198	0		Skewness	0.00384804	1.00268	0.704371	0.505109	n/a
10	1	64.7096	6.45328	13.0802	15.7569	0		cv	0.449931	0.631517	0.587888	0.516292	n/a
11	1	18.9334	30.151	25.9689	24.9467	0		Min Val	0.829225	0.89863	0.319743	0.864552	0
12	1	74.7459	4.09444	4.46888	16.6908	0		Max Val	93.7072	42.394	46.0903	57.051	0
13	1	63.7571	9.94713	15.8325	10.4633	0		Fold	113.006	47.1763	144.148	65.989	n/a
14	1	92.4226	0.960179	3.15327	3.46401	0		Std Dev	21.5541	7.79594	9.60967	12.0832	0
15	1	59.2113	12.5877	10.0957	18.1053	0
16	1	47.7999	15.6639	14.5989	21.9373	0
17	1	46.3172	11.5958	15.6003	26.4867	0
18	1	60.0145	9.30287	17.1517	13.5309	0
19	1	51.7743	11.9189	9.04342	27.2634	0
20	1	49.1782	28.8016	7.28082	14.7394	0
21	1	36.9925	14.0128	18.5885	30.4063	0
22	1	51.3546	12.6307	11.4189	24.5958	0
23	1	18.9666	22.0606	35.7946	23.1782	0
24	1	29.7514	28.2388	34.9022	7.10753	0
25	1	41.3389	4.41828	14.2862	39.9566	0
26	1	83.8099	3.5475	3.83802	8.80459	0
27	1	20.4293	10.2909	46.0903	23.1895	0
28	1	47.4042	11.2985	11.9254	29.3718	0
29	1	38.5194	21.5159	30.2394	9.72535	0
30	1	73.8238	5.94217	6.71346	13.5206	0
31	1	55.2327	5.29531	18.5409	20.9311	0
32	1	22.0808	16.2857	26.9443	34.6892	0
33	1	50.9742	11.7524	15.9931	21.2803	0
34	1	48.7903	8.48424	17.744	24.9815	0
35	1	62.4822	10.1171	14.7708	12.6299	0
36	1	2.40256	39.5629	35.4389	22.5956	0
37	1	27.0739	11.9307	7.72356	53.2718	0
38	1	39.8521	20.132	15.5558	24.4601	0
39	1	51.1609	6.8318	8.80993	33.1973	0
40	1	18.3667	3.84274	40.5563	37.2342	0
41	1	48.9052	12.6109	4.18381	34.3001	0
42	1	51.7578	7.62581	16.7111	23.9054	0
43	1	34.64	14.5263	17.0506	33.7831	0
44	1	77.3551	3.75805	3.57397	15.3129	0
45	1	80.1994	17.2853	1.10203	1.4132	0
46	1	15.9429	25.3764	29.6117	29.0691	0
47	1	44.2259	9.68032	16.754	29.3398	0
48	1	62.7468	8.90369	15.5376	12.8119	0
49	1	23.2485	19.5875	15.4164	41.7476	0
50	1	20.3942	25.3601	19.7762	34.4695	0
51	1	29.6065	18.3277	29.8346	22.2312	0
52	1	21.8264	14.243	33.9064	30.0242	0
53	1	84.6904	2.89628	7.66624	4.74704	0
54	1	34.7612	17.0978	27.2533	20.8877	0
55	1	35.3277	12.606	14.0379	38.0285	0
56	1	67.5578	9.69679	10.4096	12.3358	0
57	1	47.4765	9.98107	28.6163	13.9262	0
58	1	72.5453	4.02917	12.2968	11.1287	0
59	1	59.3208	6.07388	15.3496	19.2557	0
60	1	92.4698	3.67144	1.20175	2.65706	0
61	1	70.9607	6.15978	5.89065	16.9888	0
62	1	50.4979	18.1485	16.2789	15.0746	0
63	1	74.4764	4.70715	7.96676	12.8497	0
64	1	27.5429	20.1218	19.193	33.1423	0
65	1	79.7725	1.82332	5.19758	13.2066	0
66	1	67.5749	25.6147	1.57311	5.23732	0
67	1	56.9271	5.36986	9.32989	28.3731	0
68	1	72.0993	3.49085	7.8796	16.5303	0
69	1	47.7146	9.83429	18.4313	24.0198	0
70	1	60.5745	8.294	9.39231	21.7392	0
71	1	55.5973	10.1723	6.86975	27.3607	0
72	1	11.4266	7.17019	24.3522	57.051	0
73	1	31.1899	13.4824	20.5983	34.7294	0
74	1	26.9422	11.1401	22.4748	39.4429	0
75	1	12.1642	15.3048	40.6315	31.8995	0
76	1	80.6727	6.40614	5.82142	7.09978	0
77	1	35.674	11.6259	23.7601	28.94	0
78	1	64.2815	10.306	7.31342	18.0992	0
79	1	50.5262	16.9295	13.7266	18.8176	0
80	1	42.1994	6.3465	19.7848	31.6693	0
81	1	30.735	14.7998	22.1261	32.3391	0
82	1	49.445	6.81642	8.55628	35.1823	0
83	1	32.5321	27.4635	22.9764	17.028	0
84	1	91.1008	7.18735	0.319743	1.39207	0
85	1	26.3224	28.5887	18.4787	26.6103	0
86	1	17.3354	16.5063	16.8795	49.2787	0
87	1	55.6054	10.762	21.6969	11.9358	0
88	1	60.2799	5.95177	18.6688	15.0995	0
89	1	56.79	5.48987	9.83201	27.8881	0
90	1	79.6104	2.83193	6.73556	10.8221	0
91	1	5.23567	16.0885	23.4767	55.1991	0
92	1	20.4034	12.0648	18.3741	49.1577	0
93	1	32.0628	12.2502	20.1924	35.4945	0
94	1	34.203	12.8379	15.7873	37.1718	0
95	1	45.9182	10.1031	13.8458	30.133	0
96	1	49.3986	11.2528	22.2297	17.1189	0
97	1	53.5036	19.8165	10.9138	15.766	0
98	1	38.2871	13.7525	12.3487	35.6117	0
99	1	29.6349	11.7382	30.2704	28.3565	0
100	1	41.1183	21.6561	17.5567	19.6689	0
101	1	36.1655	29.0801	22.998	11.7564	0
102	1	20.5605	21.097	25.5961	32.7464	0
103	1	16.7198	13.5909	35.5271	34.1622	0
104	1	64.0455	4.36284	19.8228	11.7688	0
105	1	69.2394	5.81299	9.53019	15.4174	0
106	1	83.4794	2.36635	8.0113	6.143	0
107	1	14.8334	28.3338	27.8656	28.9672	0
108	1	79.8322	0.956324	4.15042	15.061	0
109	1	20.2394	22.6278	21.3377	35.7952	0
110	1	92.9935	3.9878	1.09804	1.92067	0
111	1	28.7916	17.7256	31.4929	21.9899	0
112	1	64.82	16.9114	6.07587	12.1927	0
113	1	89.9504	2.18331	5.42452	2.44181	0
114	1	59.3966	16.6736	12.2038	11.7261	0
115	1	57.828	11.7157	12.0197	18.4366	0
116	1	84.0163	0.89863	8.60534	6.47976	0
117	1	64.6957	11.972	5.61208	17.7202	0
118	1	61.3852	3.38545	7.17049	28.0588	0
119	1	51.9534	3.49762	11.0625	33.4865	0
120	1	19.7349	8.20825	24.5559	47.5009	0
121	1	0.829225	19.7698	22.9483	56.4527	0
122	1	46.2557	22.1043	18.9969	12.6431	0
123	1	30.6071	12.5614	22.1666	34.6649	0
124	1	2.99073	33.8269	20.7119	42.4705	0
125	1	69.9773	6.48916	5.79685	17.7367	0
126	1	62.5579	4.32701	16.2178	16.8972	0
127	1	17.779	21.1389	12.6539	48.4282	0
128	1	61.12	6.72122	11.5661	20.5926	0
129	1	45.6499	14.7085	13.2101	26.4315	0
130	1	67.3335	1.67394	3.85683	27.1358	0
131	1	24.8055	6.03308	28.5982	40.5632	0
132	1	69.5868	11.8317	7.83855	10.7429	0
133	1	58.6034	3.48944	8.59273	29.3144	0
134	1	45.1173	14.2274	15.3637	25.2917	0
135	1	43.3993	16.409	14.2435	25.9482	0
136	1	93.7072	0.911137	1.18448	4.1972	0
137	1	43.5589	9.78017	21.7168	24.9441	0
138	1	67.9121	8.44992	8.07766	15.5603	0
139	1	28.5318	23.8514	23.608	24.0088	0
140	1	25.6586	16.0877	43.7632	14.4905	0
141	1	24.2583	20.5962	26.8714	28.2741	0
142	1	57.4766	5.093	19.0742	18.3562	0
143	1	33.7073	17.3902	15.0407	33.8618	0
144	1	63.9835	11.0657	13.0521	11.8987	0
145	1	58.7562	9.24086	16.8326	15.1704	0
146	1	59.7607	10.2775	15.4021	14.5597	0
147	1	60.8677	6.33834	13.6438	19.1502	0
148	1	30.8934	18.7489	9.39457	40.9631	0
149	1	32.2934	11.7327	43.8873	12.0866	0
150	1	46.5334	10.9502	8.72208	33.7944	0
151	1	71.5219	6.40412	16.863	5.21103	0
152	1	51.7271	7.24229	17.6017	23.429	0
153	1	25.9277	23.5426	29.049	21.4807	0
154	1	83.0102	14.6156	1.41903	0.955124	0
155	1	67.4698	8.09009	8.56891	15.8713	0
156	1	73.2245	8.65039	11.5245	6.6006	0
157	1	43.4854	4.18425	12.2588	40.0716	0
158	1	32.5304	18.5089	25.3084	23.6523	0
159	1	61.6227	4.10106	18.3585	15.9178	0
160	1	57.1141	7.23305	15.1108	20.542	0
161	1	56.7587	5.32053	15.9991	21.9216	0
162	1	75.3538	5.92755	6.33035	12.3883	0
163	1	43.4733	22.2159	16.703	17.6078	0
164	1	5.5902	32.2718	27.6785	34.4595	0
165	1	56.6771	6.545	13.9641	22.8138	0
166	1	31.7103	28.4325	18.7991	21.0581	0
167	1	8.21792	5.7149	32.0355	54.0317	0
168	1	60.9655	6.22721	8.54882	24.2584	0
169	1	14.1454	15.8512	28.1546	41.8488	0
170	1	33.2001	11.2217	8.86142	46.7168	0
171	1	82.9605	14.8348	1.34016	0.864552	0
172	1	45.7742	4.86682	7.22554	42.1334	0
173	1	40.7317	26.5448	20.5213	12.2022	0
174	1	45.9415	11.6086	11.1452	31.3047	0
175	1	62.3391	4.29992	15.2636	18.0974	0
176	1	31.6465	16.695	27.0997	24.5588	0
177	1	65.8102	21.415	7.43029	5.34447	0
178	1	37.3477	12.0048	20.3492	30.2983	0
179	1	58.2579	5.75896	5.99171	29.9915	0
180	1	48.8749	7.97414	20.538	22.613	0
181	1	78.1147	4.84547	5.62893	11.4109	0
182	1	54.1092	9.17764	11.5409	25.1723	0
183	1	55.4796	7.25185	10.3478	26.9207	0
184	1	50.4134	22.9093	7.69445	18.9828	0
185	1	42.93	22.534	22.4849	12.0511	0
186	1	51.9055	5.29412	9.48492	33.3155	0
187	1	24.7116	17.0517	24.525	33.7116	0
188	1	22.5987	11.4124	32.5379	33.4509	0
189	1	53.1628	7.82437	16.0826	22.9302	0
190	1	59.9811	8.39344	10.0398	21.5856	0
191	1	52.1439	10.1061	8.41466	29.3354	0
192	1	75.5843	2.61308	4.79837	17.0042	0
193	1	9.04216	11.4465	35.7329	43.7784	0
194	1	56.6687	15.0816	13.1718	15.0779	0
195	1	33.626	16.3467	30.0266	20.0006	0
196	1	51.4131	16.5592	8.50027	23.5274	0
197	1	82.2863	1.05044	5.51526	11.148	0
198	1	30.5884	20.6364	21.7026	27.0726	0
199	1	74.877	3.81189	3.50968	17.8014	0
200	1	15.7019	42.394	28.195	13.7091	0

## Sheet: Conc Profiles CSys(CPlasma)
Summary Statistics			Mean
	From (h)	To (h)	TMax (h)	CMax (µg/mL)	AUC (µg/mL.h)
CPlasma (µg/mL)	0	0.0166667	0.0045069	18.0684	0.18607
Population Statistics
Time (h)			0	0.0025069	0.0045069	0.00683489	0.00983489	0.0118349	0.0138349	0.0158349	0.0166667	0.0186667	0.0206667	0.0226667	0.0246667	0.0266667	0.0286667	0.0306667	0.0326667	0.0346667	0.0366667	0.0386667	0.0406667	0.0426667	0.0446667	0.0466667	0.0486667	0.0506667	0.0526667	0.0546667	0.0566667	0.0586667	0.0606667	0.0626667	0.0646667	0.0666667	0.0686667	0.0706667	0.0726667	0.0746667	0.0766667	0.0786667	0.0806667	0.0826667	0.0846667	0.0866667	0.0886667	0.0906667	0.0926667
CSys Mean (µg/mL)			0	14.4826	18.0684	15.9155	10.9738	8.93288	7.48709	6.41998	6.18253	5.63362	5.17438	4.78025	4.43798	4.13953	3.87921	3.65242	3.45517	3.28387	3.13533	3.00667	2.89534	2.7991	2.71596	2.64422	2.58237	2.5291	2.48329	2.44394	2.41021	2.38136	2.35674	2.33579	2.31804	2.30307	2.2905	2.28003	2.27138	2.26432	2.25863	2.25413	2.25068	2.24813	2.24637	2.24529	2.24481	2.24485	2.24533
CSys 95th percentile			0	16.3503	20.4804	18.0235	12.4802	10.2257	8.57374	7.33804	7.25978	6.61602	6.05246	5.60855	5.20074	4.8699	4.57871	4.31254	4.09313	3.90242	3.72692	3.5644	3.4218	3.2969	3.18759	3.10048	3.026	2.96165	2.90614	2.85485	2.80814	2.76743	2.73209	2.70794	2.6834	2.66146	2.64258	2.62617	2.61215	2.60021	2.59389	2.59061	2.58845	2.58726	2.58692	2.58733	2.58838	2.58999	2.58987
CSys 5th percentile			0	12.6721	15.9748	13.9557	9.50742	7.71426	6.46949	5.57324	5.16559	4.71498	4.29925	3.98887	3.72565	3.48343	3.27794	3.09504	2.93775	2.80166	2.68019	2.57163	2.48615	2.39862	2.32005	2.25194	2.20417	2.16871	2.13029	2.09465	2.06524	2.04654	2.03099	2.01051	1.9925	1.97704	1.96405	1.95493	1.94735	1.9382	1.93054	1.92622	1.91891	1.91531	1.91269	1.91137	1.91061	1.91031	1.9104
Individual Statistics
Type	Individual	Trial
Time (h)			0	0.0025069	0.0045069	0.00683489	0.00983489	0.0118349	0.0138349	0.0158349	0.0166667	0.0186667	0.0206667	0.0226667	0.0246667	0.0266667	0.0286667	0.0306667	0.0326667	0.0346667	0.0366667	0.0386667	0.0406667	0.0426667	0.0446667	0.0466667	0.0486667	0.0506667	0.0526667	0.0546667	0.0566667	0.0586667	0.0606667	0.0626667	0.0646667	0.0666667	0.0686667	0.0706667	0.0726667	0.0746667	0.0766667	0.0786667	0.0806667	0.0826667	0.0846667	0.0866667	0.0886667	0.0906667	0.0926667
CSys (µg/mL)	1	1	0	10.9077	16.7859	13.4108	8.86342	7.112	5.91297	5.04169	5.04169	4.57544	4.17938	3.83646	3.53846	3.2801	3.05697	2.86497	2.70023	2.55917	2.43859	2.33562	2.24778	2.17292	2.10917	2.05493	2.00885	1.96975	1.93662	1.90862	1.885	1.86513	1.84849	1.8346	1.82307	1.81357	1.80581	1.79954	1.79454	1.79064	1.78769	1.78554	1.78408	1.78323	1.78288	1.78298	1.78346	1.78426	1.78535
CSys (µg/mL)	2	1	0	13.7265	16.8924	14.8481	10.4847	8.62674	7.28996	6.29474	6.29474	5.73163	5.26938	4.87731	4.53811	4.24156	3.98111	3.75202	3.55059	3.37364	3.21838	3.08231	2.96321	2.85906	2.76807	2.68865	2.61941	2.5591	2.50663	2.46103	2.42147	2.38721	2.35758	2.33203	2.31004	2.29119	2.27507	2.26137	2.24977	2.24002	2.23188	2.22517	2.21969	2.2153	2.21186	2.20925	2.20737	2.20613	2.20544
CSys (µg/mL)	3	1	0	15.8979	19.5908	17.185	11.9938	9.73944	8.09748	6.86773	6.86773	6.15925	5.58626	5.11074	4.7096	4.36807	4.07595	3.82567	3.61121	3.42756	3.27047	3.13627	3.02178	2.92423	2.84124	2.77074	2.71097	2.6604	2.6177	2.58176	2.55161	2.52641	2.50546	2.48816	2.47397	2.46246	2.45323	2.44597	2.44039	2.43624	2.43333	2.43148	2.43054	2.43037	2.43087	2.43193	2.43349	2.43546	2.43779
CSys (µg/mL)	4	1	0	13.0255	15.9834	13.9606	9.77746	8.00641	6.74182	5.80946	5.80946	5.29087	4.86948	4.51439	4.20809	3.94033	3.70468	3.49674	3.31315	3.15115	3.00834	2.88259	2.77198	2.6748	2.5895	2.51469	2.44916	2.39182	2.34169	2.29793	2.25978	2.22659	2.19775	2.17276	2.15117	2.13256	2.11658	2.10293	2.09132	2.08152	2.0733	2.06649	2.06091	2.05642	2.05289	2.05021	2.04827	2.04698	2.04628
CSys (µg/mL)	5	1	0	15.9464	19.5583	16.9891	11.778	9.56642	7.98352	6.81484	6.81484	6.16053	5.63066	5.18717	4.80806	4.48003	4.19448	3.94528	3.7277	3.5378	3.37222	3.22797	3.10244	2.9933	2.8985	2.81622	2.74488	2.68308	2.6296	2.58338	2.54349	2.50911	2.47954	2.45416	2.43244	2.4139	2.39813	2.38479	2.37356	2.36417	2.35638	2.34999	2.34482	2.34071	2.33753	2.33515	2.33348	2.33243	2.33191
CSys (µg/mL)	6	1	0	16.1495	19.8364	17.4916	12.3611	10.1419	8.53439	7.33664	7.33664	6.65466	6.10234	5.64017	5.24479	4.90202	4.60268	4.3404	4.11033	3.90855	3.73169	3.57684	3.44139	3.32304	3.21973	3.12964	3.05116	2.98288	2.92354	2.87205	2.82743	2.78884	2.75554	2.72688	2.70228	2.68124	2.66333	2.64816	2.63539	2.62473	2.61591	2.60872	2.60295	2.59842	2.59499	2.59252	2.59089	2.58999	2.58975
CSys (µg/mL)	7	1	0	15.2803	18.8454	16.9353	11.6451	9.39916	7.7888	6.59719	5.68384	5.19552	4.78249	4.42755	4.12081	3.85564	3.62685	3.42999	3.26104	3.11639	2.99279	2.88734	2.79753	2.72115	2.65627	2.60125	2.55467	2.51532	2.48215	2.45427	2.43093	2.41146	2.39531	2.382	2.37112	2.36232	2.35531	2.34983	2.34565	2.3426	2.34051	2.33924	2.33868	2.33872	2.33928	2.34029	2.34168	2.3434	2.3454
CSys (µg/mL)	8	1	0	13.9229	17.1819	15.4738	10.771	8.79773	7.38387	6.33044	6.33044	5.72814	5.23055	4.80839	4.44527	4.13115	3.85903	3.62344	3.41977	3.24398	3.09249	2.96212	2.85008	2.75391	2.67147	2.6009	2.54057	2.48909	2.44524	2.40799	2.37643	2.34979	2.32738	2.30863	2.29303	2.28017	2.26965	2.26117	2.25444	2.24921	2.2453	2.24251	2.24069	2.23971	2.23945	2.23981	2.24071	2.24208	2.24385
CSys (µg/mL)	9	1	0	16.3099	20.0484	17.8585	12.2264	9.9001	8.2622	7.06458	6.15007	5.6731	5.26022	4.89666	4.57509	4.29103	4.04097	3.82165	3.6299	3.46272	3.31725	3.19089	3.08125	2.98625	2.904	2.83288	2.77145	2.71846	2.67281	2.63356	2.59987	2.57104	2.54642	2.52548	2.50773	2.49277	2.48024	2.46982	2.46124	2.45426	2.44868	2.44431	2.441	2.43861	2.43703	2.43614	2.43587	2.43612	2.43684
CSys (µg/mL)	10	1	0	17.0702	21.0018	18.6307	12.8682	10.5112	8.85203	7.63157	7.63157	6.95433	6.39129	5.90837	5.48772	5.11908	4.7956	4.51201	4.26378	4.04688	3.85762	3.6927	3.54913	3.42426	3.31575	3.22154	3.1398	3.06897	3.00764	2.95462	2.90884	2.86939	2.83546	2.80634	2.78143	2.76019	2.74216	2.72692	2.71413	2.70347	2.69467	2.6875	2.68174	2.67723	2.6738	2.67132	2.66966	2.66873	2.66842
CSys (µg/mL)	11	1	0	15.0439	18.5364	16.6795	11.6009	9.47543	7.96418	6.84914	5.99098	5.53418	5.13866	4.7903	4.48199	4.20941	3.96918	3.75822	3.57356	3.41235	3.27192	3.14979	3.04373	2.95175	2.87206	2.80311	2.74354	2.69214	2.64788	2.60983	2.57721	2.54931	2.52555	2.50538	2.48834	2.47405	2.46213	2.4523	2.44428	2.43785	2.43279	2.42894	2.42613	2.42424	2.42314	2.42274	2.42294	2.42367	2.42486
CSys (µg/mL)	12	1	0	13.9582	17.2175	15.2742	10.4371	8.45375	7.04858	6.00755	6.00755	5.4203	4.93199	4.51624	4.15865	3.8502	3.58426	3.35534	3.15863	2.98988	2.84527	2.72148	2.61558	2.52502	2.44763	2.38152	2.32506	2.27687	2.23575	2.20071	2.17085	2.14544	2.12384	2.1055	2.08996	2.07681	2.06572	2.05639	2.04856	2.04203	2.03661	2.03215	2.0285	2.02556	2.02322	2.0214	2.02003	2.01904	2.01838
CSys (µg/mL)	13	1	0	16.2032	20.0073	18.1359	12.6498	10.2863	8.57361	7.29434	6.30615	5.76618	5.3092	4.91627	4.57634	4.28199	4.02748	3.8079	3.61891	3.4566	3.31745	3.19833	3.09652	3.00959	2.93547	2.87235	2.81867	2.7731	2.73448	2.70182	2.67428	2.65113	2.63174	2.61557	2.60217	2.59114	2.58215	2.5749	2.56914	2.56467	2.56129	2.55886	2.55723	2.55629	2.55594	2.5561	2.55669	2.55765	2.55893
CSys (µg/mL)	14	1	0	14.5644	17.9221	15.6313	10.5392	8.59539	7.27313	6.31339	6.31339	5.80356	5.36256	4.97186	4.62386	4.31444	4.04036	3.79842	3.5854	3.39816	3.23373	3.08941	2.96274	2.85154	2.7539	2.66813	2.59275	2.52646	2.46815	2.4168	2.37157	2.33169	2.29651	2.26543	2.23796	2.21366	2.19212	2.17303	2.15607	2.14099	2.12757	2.11559	2.1049	2.09533	2.08676	2.07906	2.07214	2.06589	2.06026
CSys (µg/mL)	15	1	0	13.6206	16.7788	15.0989	10.4697	8.51046	7.10834	6.07078	5.27316	4.84554	4.47971	4.16117	3.88211	3.63753	3.42363	3.2371	3.0749	2.9342	2.81241	2.70717	2.61638	2.53816	2.47086	2.41305	2.36346	2.32101	2.28473	2.25382	2.22756	2.20532	2.18657	2.17084	2.15774	2.1469	2.13803	2.13086	2.12517	2.12076	2.11746	2.11512	2.1136	2.11281	2.11263	2.113	2.11383	2.11506	2.11664
CSys (µg/mL)	16	1	0	13.6632	16.7629	14.7637	10.4479	8.59664	7.26396	6.27562	6.27562	5.71893	5.26707	4.88685	4.55906	4.27236	4.01965	3.79612	3.5982	3.42299	3.26802	3.13108	3.01022	2.90366	2.80981	2.72724	2.65466	2.59095	2.53507	2.48614	2.44335	2.40599	2.37344	2.34515	2.32061	2.2994	2.28114	2.26547	2.25211	2.24078	2.23125	2.22331	2.21677	2.21148	2.20728	2.20406	2.20169	2.20008	2.19913
CSys (µg/mL)	17	1	0	14.284	17.6121	15.8815	10.9934	8.89857	7.38711	6.26317	5.39856	4.9303	4.53457	4.1946	3.90066	3.64623	3.42634	3.23675	3.07369	2.93377	2.81396	2.71156	2.62417	2.54973	2.48641	2.43265	2.3871	2.3486	2.31614	2.28887	2.26604	2.24703	2.2313	2.21837	2.20785	2.1994	2.19271	2.18755	2.18369	2.18094	2.17915	2.17819	2.17792	2.17826	2.17912	2.18042	2.18209	2.18409	2.18637
CSys (µg/mL)	18	1	0	13.9384	17.1791	15.4572	10.7503	8.78752	7.39447	6.36724	5.57618	5.15574	4.79047	4.46787	4.18179	3.92848	3.70499	3.50855	3.33646	3.18612	3.05507	2.94103	2.84195	2.75598	2.68148	2.61702	2.56132	2.51327	2.47192	2.4364	2.40599	2.38003	2.35796	2.33928	2.32358	2.31046	2.2996	2.29072	2.28356	2.2779	2.27357	2.27037	2.26818	2.26687	2.26631	2.26643	2.26712	2.26832	2.26996
CSys (µg/mL)	19	1	0	15.8913	19.561	17.5698	12.1029	9.76063	8.07486	6.82686	5.8723	5.36083	4.93129	4.56383	4.24685	3.97277	3.7359	3.53154	3.3556	3.20442	3.07475	2.96369	2.86869	2.78753	2.71826	2.65921	2.60893	2.56616	2.52985	2.49907	2.47303	2.45106	2.43258	2.41709	2.40416	2.39343	2.38458	2.37736	2.37152	2.36687	2.36324	2.36049	2.35849	2.35713	2.35633	2.356	2.35608	2.35651	2.35724
CSys (µg/mL)	20	1	0	12.794	15.7304	13.7823	9.31676	7.51201	6.25078	5.32907	5.32907	4.82333	4.40476	4.04823	3.74043	3.47339	3.24158	3.04058	2.86659	2.71623	2.58647	2.47463	2.37832	2.29546	2.22424	2.16306	2.11056	2.06555	2.02701	1.99405	1.96592	1.94195	1.92156	1.90429	1.88968	1.8774	1.8671	1.85854	1.85146	1.84567	1.841	1.83728	1.8344	1.83223	1.83069	1.82968	1.82914	1.829	1.8292
CSys (µg/mL)	21	1	0	15.1676	18.6711	16.442	11.2139	9.12123	7.66217	6.59216	6.59216	6.00392	5.50943	5.08221	4.70902	4.38219	4.09627	3.84672	3.62942	3.44057	3.27672	3.13473	3.01182	2.90552	2.81366	2.73435	2.66595	2.60702	2.55631	2.51275	2.47538	2.44341	2.41611	2.39287	2.37317	2.35654	2.34256	2.33091	2.32126	2.31336	2.30699	2.30193	2.29802	2.29511	2.29307	2.29178	2.29115	2.2911	2.29153
CSys (µg/mL)	22	1	0	15.5781	19.2453	17.2929	11.9541	9.70142	8.08205	6.87463	6.87463	6.18223	5.6146	5.13795	4.73269	4.38629	4.08979	3.83612	3.61933	3.43432	3.27663	3.14238	3.02819	2.93115	2.84876	2.77887	2.71964	2.6695	2.62711	2.59132	2.56116	2.5358	2.51453	2.49674	2.48193	2.46964	2.45952	2.45123	2.44451	2.43912	2.43488	2.43161	2.42916	2.42742	2.42628	2.42566	2.42547	2.42565	2.42615
CSys (µg/mL)	23	1	0	14.085	17.3912	15.6789	10.8517	8.79109	7.30165	6.18937	6.18937	5.54762	5.02547	4.59032	4.22276	3.91023	3.64384	3.4167	3.22318	3.0585	2.91855	2.79977	2.69909	2.61387	2.54184	2.48105	2.42984	2.3868	2.3507	2.32052	2.29537	2.27452	2.25732	2.24324	2.2318	2.22262	2.21536	2.20975	2.20552	2.20249	2.20046	2.1993	2.19888	2.19909	2.19983	2.20102	2.20261	2.20453	2.20673
CSys (µg/mL)	24	1	0	13.9764	17.2439	15.5377	10.8128	8.84375	7.44479	6.41094	5.61272	5.18644	4.81547	4.48782	4.19761	3.94115	3.71542	3.51752	3.34461	3.19397	3.06302	2.94939	2.85094	2.76576	2.69218	2.62871	2.57406	2.52709	2.48682	2.45239	2.42304	2.39813	2.37707	2.35939	2.34463	2.33243	2.32246	2.31443	2.30809	2.30322	2.29964	2.29717	2.29567	2.29503	2.29512	2.29586	2.29715	2.29893	2.30114
CSys (µg/mL)	25	1	0	15.8762	19.5875	17.6625	12.2219	9.90073	8.22934	6.98694	6.03021	5.51253	5.07327	4.69474	4.36681	4.08267	3.83702	3.62521	3.4431	3.2869	3.15321	3.03897	2.94153	2.85854	2.78796	2.72804	2.67727	2.63434	2.59813	2.56769	2.54219	2.52093	2.5033	2.48879	2.47694	2.46738	2.45978	2.45386	2.44938	2.44614	2.44395	2.44267	2.44216	2.44232	2.44304	2.44426	2.44589	2.44787	2.45017
CSys (µg/mL)	26	1	0	14.9769	18.4445	16.1723	11.3196	9.23123	7.7191	6.59054	6.59054	5.94627	5.42275	4.98492	4.61212	4.29147	4.01432	3.77429	3.56638	3.38635	3.23062	3.096	2.97975	2.87942	2.7929	2.71835	2.65414	2.59888	2.55137	2.51054	2.47549	2.44544	2.4197	2.39769	2.37891	2.3629	2.3493	2.33777	2.32804	2.31986	2.31301	2.30731	2.30262	2.29878	2.29568	2.29323	2.29133	2.2899	2.28889
CSys (µg/mL)	27	1	0	13.6067	16.7379	14.6977	10.3875	8.56498	7.26011	6.29184	6.29184	5.74862	5.30161	4.92083	4.58974	4.29879	4.04198	3.81503	3.6146	3.43779	3.28206	3.14508	3.02476	2.9192	2.82672	2.74578	2.67505	2.61332	2.55953	2.51276	2.47216	2.43701	2.40666	2.38055	2.35818	2.33909	2.32291	2.30929	2.29792	2.28854	2.28091	2.27483	2.2701	2.26657	2.2641	2.26255	2.26182	2.26181	2.26243
CSys (µg/mL)	28	1	0	15.1886	18.6128	16.3973	11.1366	9.03379	7.59043	6.55688	5.77763	5.39322	5.05289	4.74544	4.46663	4.21449	3.98758	3.78434	3.60301	3.44172	3.29857	3.17173	3.05949	2.96026	2.87261	2.79525	2.72704	2.66694	2.61405	2.56756	2.52674	2.49096	2.45965	2.43231	2.4085	2.38781	2.36991	2.35446	2.34121	2.3299	2.32031	2.31226	2.30556	2.30007	2.29565	2.29219	2.28956	2.28769	2.28648
CSys (µg/mL)	29	1	0	14.1257	17.4474	15.4661	10.5024	8.51945	7.12869	6.09961	6.09961	5.52434	5.03843	4.62009	4.25807	3.94506	3.6752	3.44323	3.24434	3.07415	2.92873	2.80461	2.69878	2.60862	2.53187	2.46661	2.41118	2.36416	2.32434	2.29068	2.2623	2.23843	2.21843	2.20173	2.18788	2.17646	2.16712	2.15956	2.15354	2.14883	2.14524	2.14263	2.14084	2.13977	2.13931	2.13938	2.13991	2.14083	2.14208
CSys (µg/mL)	30	1	0	15.1344	18.6661	16.8038	11.6049	9.39621	7.81091	6.6358	5.73277	5.24751	4.83532	4.47955	4.17075	3.90265	3.67035	3.46959	3.29654	3.14771	3.01994	2.91041	2.81663	2.73642	2.66788	2.60938	2.5595	2.51702	2.48089	2.45021	2.42421	2.40222	2.38368	2.3681	2.35505	2.34418	2.33518	2.32778	2.32175	2.31691	2.31308	2.31011	2.30789	2.30631	2.30527	2.3047	2.30454	2.30472	2.30519
CSys (µg/mL)	31	1	0	15.0044	18.4531	16.3235	11.1761	9.07999	7.60777	6.52672	6.52672	5.92765	5.43006	5.00427	4.63463	4.312	4.03018	3.78425	3.57003	3.38372	3.22192	3.08159	2.96	2.85472	2.76365	2.68493	2.61694	2.55828	2.5077	2.46416	2.42673	2.39459	2.36707	2.34354	2.32348	2.30645	2.29203	2.27989	2.26973	2.26129	2.25434	2.24869	2.24416	2.24061	2.23792	2.23597	2.23465	2.2339	2.23364
CSys (µg/mL)	32	1	0	15.1972	18.7419	16.5576	11.3513	9.26692	7.80755	6.73002	6.73002	6.13129	5.62418	5.18432	4.79964	4.46299	4.16902	3.91303	3.6907	3.498	3.33125	3.18714	3.06273	2.95542	2.86294	2.78334	2.71488	2.6561	2.60568	2.56253	2.52566	2.49425	2.46757	2.44498	2.42595	2.41	2.39671	2.38575	2.37679	2.36958	2.36388	2.35949	2.35624	2.35398	2.35258	2.35193	2.35192	2.35247	2.35351
CSys (µg/mL)	33	1	0	13.5471	16.6202	14.4891	10.137	8.30668	7.00586	6.05011	6.05011	5.52313	5.09442	4.73221	4.41877	4.14386	3.90115	3.68635	3.49619	3.32794	3.17924	3.04798	2.93223	2.83026	2.74052	2.66161	2.59228	2.53144	2.4781	2.43138	2.39051	2.35482	2.3237	2.29662	2.27311	2.25275	2.23517	2.22005	2.20711	2.19608	2.18675	2.17892	2.17241	2.16707	2.16277	2.15937	2.15678	2.1549	2.15365
CSys (µg/mL)	34	1	0	14.8054	18.2478	16.0891	11.0416	9.04111	7.64875	6.62343	6.62343	6.05847	5.5764	5.15479	4.78312	4.45544	4.1673	3.91472	3.69392	3.50132	3.33358	3.18769	3.06092	2.95085	2.85537	2.77262	2.70096	2.63899	2.58545	2.53927	2.49951	2.46534	2.43606	2.41103	2.38971	2.37163	2.35638	2.34359	2.33295	2.32418	2.31705	2.31135	2.30689	2.30352	2.3011	2.2995	2.29863	2.29839	2.2987
CSys (µg/mL)	35	1	0	14.4838	17.871	16.1483	11.2003	9.07226	7.53272	6.38535	5.50142	5.02054	4.61476	4.26682	3.96661	3.70731	3.48364	3.29114	3.12587	2.98429	2.86323	2.75991	2.67185	2.59693	2.53327	2.47928	2.43356	2.39494	2.36239	2.33504	2.31215	2.29307	2.27724	2.26422	2.25358	2.24499	2.23815	2.2328	2.22874	2.22578	2.22375	2.22252	2.22199	2.22203	2.22258	2.22356	2.2249	2.22655	2.22847
CSys (µg/mL)	36	1	0	14.9857	18.4001	15.9625	11.1587	9.17972	7.78623	6.76375	6.76375	6.20482	5.74139	5.3425	4.99201	4.68111	4.40443	4.15816	3.93922	3.74487	3.57262	3.42016	3.28537	3.16632	3.06128	2.96868	2.88712	2.81536	2.75228	2.6969	2.64835	2.60585	2.56872	2.53634	2.50818	2.48376	2.46266	2.44449	2.42893	2.41567	2.40446	2.39507	2.38729	2.38093	2.37583	2.37186	2.36888	2.36678	2.36546
CSys (µg/mL)	37	1	0	15.2476	18.756	16.4203	11.43	9.2636	7.68862	6.51254	6.51254	5.83758	5.29381	4.84366	4.4643	4.14119	3.86444	3.62681	3.42265	3.24732	3.09687	2.96793	2.85755	2.76318	2.68261	2.61392	2.55546	2.50578	2.46366	2.42804	2.39799	2.37274	2.35161	2.33402	2.31946	2.30752	2.29781	2.29004	2.28392	2.27922	2.27574	2.27331	2.27178	2.27102	2.27093	2.27141	2.27238	2.27376	2.27551
CSys (µg/mL)	38	1	0	13.8178	17.0446	15.3508	10.5999	8.57726	7.12292	6.04312	5.21234	4.76393	4.38334	4.05528	3.77101	3.52467	3.31165	3.12797	2.97003	2.83455	2.71859	2.61951	2.53501	2.46305	2.40187	2.34995	2.30599	2.26885	2.23756	2.21129	2.18932	2.17104	2.15593	2.14354	2.13347	2.1254	2.11904	2.11415	2.11051	2.10795	2.10632	2.10547	2.10531	2.10572	2.10664	2.10797	2.10968	2.11169	2.11397
CSys (µg/mL)	39	1	0	11.3789	17.5444	14.1021	9.34325	7.47414	6.17952	5.23295	5.23295	4.71673	4.2834	3.91291	3.59479	3.32204	3.08893	2.89036	2.72164	2.57858	2.45744	2.35498	2.26839	2.19527	2.13358	2.08157	2.03776	2.00092	1.96997	1.94402	1.92232	1.9042	1.88914	1.87667	1.86639	1.85797	1.85114	1.84565	1.84131	1.83793	1.83539	1.83355	1.8323	1.83157	1.83127	1.83135	1.83175	1.83241	1.83331
CSys (µg/mL)	40	1	0	14.735	18.1227	15.8849	10.7247	8.64893	7.20171	6.14516	6.14516	5.56725	5.08797	4.67911	4.32585	4.01935	3.7534	3.52299	3.32374	3.15175	3.00353	2.87595	2.76626	2.67204	2.59119	2.52188	2.46253	2.41177	2.36842	2.33147	2.30004	2.27337	2.25081	2.23179	2.21584	2.20252	2.19149	2.18243	2.17506	2.16917	2.16455	2.16102	2.15845	2.15669	2.15564	2.15521	2.15532	2.15588	2.15684
CSys (µg/mL)	41	1	0	14.974	18.438	16.4784	11.2565	9.05727	7.48992	6.33611	5.45498	4.98881	4.59344	4.25249	3.95679	3.70028	3.47826	3.28664	3.12172	2.98012	2.85879	2.75499	2.66631	2.59064	2.52615	2.47126	2.4246	2.38499	2.35143	2.32305	2.29912	2.279	2.26214	2.24807	2.23641	2.2268	2.21896	2.21262	2.20758	2.20365	2.20068	2.19852	2.19706	2.1962	2.19585	2.19594	2.19642	2.19722	2.19829
CSys (µg/mL)	42	1	0	12.5071	15.3763	13.735	9.47536	7.71542	6.47762	5.57364	4.88356	4.52518	4.21381	3.93798	3.69223	3.47344	3.27929	3.10763	2.95638	2.82347	2.70694	2.60496	2.51584	2.43805	2.37025	2.31122	2.25989	2.21533	2.17671	2.14331	2.11448	2.08967	2.06839	2.0502	2.03473	2.02165	2.01066	2.00151	1.99397	1.98785	1.98298	1.97919	1.97637	1.97438	1.97313	1.97253	1.9725	1.97297	1.97387
CSys (µg/mL)	43	1	0	11.6282	17.9089	14.3974	9.54782	7.64723	6.33406	5.37612	5.37612	4.85629	4.41968	4.04564	3.7235	3.44635	3.20862	3.00534	2.83197	2.68443	2.55904	2.45261	2.36236	2.2859	2.22119	2.16646	2.12025	2.08127	2.04845	2.02087	1.99777	1.97846	1.96239	1.94907	1.93811	1.92914	1.92189	1.91609	1.91153	1.90803	1.90544	1.90362	1.90246	1.90187	1.90176	1.90207	1.90273	1.9037	1.90493
CSys (µg/mL)	44	1	0	13.2588	16.3182	14.6274	10.117	8.23506	6.90091	5.91977	5.16715	4.76918	4.42494	4.1218	3.85342	3.61598	3.40652	3.22237	3.06098	2.9199	2.79681	2.68959	2.5963	2.51522	2.44481	2.38372	2.33077	2.28491	2.24524	2.21097	2.18141	2.15594	2.13406	2.11529	2.09923	2.08555	2.07393	2.0641	2.05585	2.04895	2.04325	2.03858	2.03481	2.03182	2.02952	2.02781	2.02661	2.02586	2.0255
CSys (µg/mL)	45	1	0	13.7625	16.9099	14.819	10.4257	8.56176	7.22753	6.24085	6.24085	5.6897	5.2406	4.86147	4.53415	4.24797	3.99622	3.77421	3.57837	3.4057	3.25362	3.11981	3.0022	2.89893	2.80833	2.72893	2.65939	2.59856	2.5454	2.49899	2.45854	2.42333	2.39274	2.36621	2.34327	2.32349	2.30648	2.29193	2.27953	2.26903	2.26021	2.25287	2.24682	2.24192	2.23802	2.23502	2.2328	2.23126	2.23034
CSys (µg/mL)	46	1	0	13.6581	16.8435	15.2125	10.5751	8.59186	7.16146	6.09637	5.27452	4.82753	4.44716	4.11821	3.83204	3.58298	3.36663	3.1792	3.01726	2.87769	2.75765	2.65461	2.56631	2.49075	2.42622	2.3712	2.32439	2.28465	2.25101	2.22262	2.19876	2.17881	2.16222	2.14852	2.13732	2.12827	2.12107	2.11547	2.11124	2.10819	2.10616	2.105	2.1046	2.10485	2.10565	2.10693	2.10862	2.11067	2.11302
CSys (µg/mL)	47	1	0	13.8717	17.0876	15.4087	10.7588	8.79991	7.40128	6.3662	5.56806	5.13972	4.76943	4.4436	4.15527	3.9002	3.67519	3.47735	3.30395	3.15237	3.02016	2.90506	2.805	2.71815	2.64287	2.57771	2.5214	2.47283	2.43101	2.3951	2.36435	2.33811	2.3158	2.29693	2.28106	2.26782	2.25686	2.24791	2.2407	2.23501	2.23065	2.22745	2.22526	2.22396	2.22342	2.22356	2.22428	2.2255	2.22717
CSys (µg/mL)	48	1	0	15.0613	18.537	16.452	11.2961	9.15193	7.62799	6.50254	6.50254	5.8695	5.35011	4.91178	4.53624	4.21232	3.9323	3.69025	3.48124	3.301	3.14576	3.01222	2.89745	2.79893	2.71442	2.642	2.58001	2.52702	2.48176	2.44319	2.41037	2.38251	2.35893	2.33904	2.32232	2.30834	2.29673	2.28715	2.27934	2.27305	2.26806	2.26421	2.26134	2.25931	2.25801	2.25735	2.25723	2.25758	2.25835
CSys (µg/mL)	49	1	0	12.6782	19.5864	15.708	10.5108	8.52851	7.1704	6.17516	6.17516	5.63793	5.17243	4.76323	4.4037	4.08943	3.81619	3.57966	3.37557	3.19984	3.04876	2.91902	2.8077	2.71227	2.63052	2.56058	2.5008	2.44978	2.4063	2.36932	2.33795	2.31142	2.28904	2.27026	2.25458	2.24156	2.23086	2.22214	2.21514	2.20961	2.20537	2.20224	2.20006	2.19871	2.19807	2.19805	2.19856	2.19954	2.20091
CSys (µg/mL)	50	1	0	13.9449	17.1103	14.9288	10.0851	8.15856	6.8294	5.86786	5.86786	5.35286	4.92458	4.55613	4.23398	3.95062	3.70117	3.48183	3.28932	3.12067	2.97315	2.84426	2.73179	2.63371	2.54827	2.47389	2.40919	2.35298	2.30418	2.26188	2.22525	2.1936	2.1663	2.1428	2.12264	2.10539	2.0907	2.07824	2.06773	2.05894	2.05165	2.04567	2.04084	2.03701	2.03407	2.0319	2.0304	2.0295	2.02912
CSys (µg/mL)	51	1	0	15.3101	18.8373	16.4949	11.2241	9.15047	7.71943	6.67567	6.67567	6.11132	5.63235	5.21427	4.84565	4.52018	4.23338	3.98136	3.7605	3.56735	3.39871	3.25165	3.12353	3.012	2.91498	2.83065	2.7574	2.69385	2.63877	2.59108	2.54986	2.51428	2.48364	2.45732	2.43476	2.4155	2.39912	2.38525	2.37359	2.36385	2.35579	2.3492	2.3439	2.33972	2.33653	2.33419	2.33261	2.33168	2.33133
CSys (µg/mL)	52	1	0	13.5448	16.7243	15.1161	10.5383	8.6087	7.22652	6.19882	5.40281	4.97133	4.59837	4.27142	3.98389	3.7315	3.51071	3.3183	3.15116	3.00637	2.88123	2.77329	2.68034	2.60043	2.53185	2.47311	2.4229	2.38009	2.3437	2.31287	2.28686	2.26504	2.24684	2.23178	2.21944	2.20947	2.20154	2.19538	2.19076	2.18746	2.18532	2.18418	2.1839	2.18436	2.18548	2.18715	2.1893	2.19188	2.19481
CSys (µg/mL)	53	1	0	16.3026	20.1024	17.7315	12.191	10.0032	8.48334	7.3646	7.3646	6.75026	6.2245	5.76333	5.35577	4.99563	4.67829	4.39954	4.15534	3.94184	3.75545	3.59289	3.45121	3.32781	3.22036	3.12686	3.04553	2.97482	2.91338	2.86005	2.81377	2.77367	2.73895	2.70893	2.68302	2.66069	2.64149	2.62502	2.61093	2.59892	2.58874	2.58014	2.57293	2.56692	2.56198	2.55796	2.55474	2.55223	2.55034
CSys (µg/mL)	54	1	0	13.3019	16.412	14.7812	10.2467	8.34277	6.98369	5.97699	5.20022	4.78289	4.42285	4.10767	3.83081	3.58801	3.37581	3.19104	3.03066	2.89185	2.77197	2.66863	2.5797	2.50329	2.43775	2.38163	2.33366	2.29276	2.25799	2.22851	2.20362	2.18271	2.16523	2.15074	2.13882	2.12913	2.12137	2.11528	2.11064	2.10726	2.10495	2.10358	2.10302	2.10317	2.10391	2.10518	2.10691	2.10902	2.11147
CSys (µg/mL)	55	1	0	12.8769	19.8927	16.1089	10.7961	8.69865	7.23878	6.16528	6.16528	5.57357	5.07434	4.64546	4.2755	3.95692	3.68351	3.44963	3.25011	3.08024	2.93583	2.8132	2.70917	2.62098	2.5463	2.48311	2.4297	2.38463	2.34664	2.3147	2.2879	2.26548	2.2468	2.23129	2.2185	2.20801	2.1995	2.19267	2.18728	2.18311	2.17998	2.17775	2.17629	2.17548	2.17523	2.17546	2.1761	2.1771	2.1784
CSys (µg/mL)	56	1	0	12.4083	19.2333	15.6678	10.6477	8.67635	7.3009	6.28083	6.28083	5.7125	5.22459	4.79921	4.4278	4.10464	3.82468	3.58305	3.37509	3.19647	3.04326	2.91197	2.79955	2.70336	2.62111	2.55084	2.49085	2.4397	2.39613	2.35909	2.32763	2.30099	2.27848	2.25952	2.24361	2.23032	2.21929	2.21019	2.20276	2.19676	2.19199	2.18828	2.18549	2.18347	2.18213	2.18138	2.18112	2.1813	2.18185
CSys (µg/mL)	57	1	0	14.0981	17.3775	15.244	10.3546	8.40877	7.05228	6.05486	6.05486	5.5053	5.041	4.6394	4.2893	3.98393	3.71816	3.4875	3.28782	3.1153	2.96648	2.83826	2.72788	2.63294	2.55135	2.48129	2.42118	2.36967	2.32558	2.2879	2.25576	2.22839	2.20515	2.18547	2.16887	2.15494	2.14329	2.13364	2.12569	2.11923	2.11406	2.10998	2.10687	2.10458	2.10301	2.10205	2.10164	2.10168	2.10213
CSys (µg/mL)	58	1	0	14.8506	18.3323	16.304	11.0626	8.93984	7.44443	6.33947	6.33947	5.72001	5.20351	4.76354	4.38581	4.06111	3.78241	3.54372	3.33973	3.1657	3.01744	2.89126	2.78398	2.69283	2.61545	2.54981	2.49418	2.44709	2.40727	2.37366	2.34534	2.32154	2.30159	2.28493	2.27107	2.25961	2.25019	2.24252	2.23634	2.23144	2.22763	2.22475	2.22268	2.22129	2.22049	2.2202	2.22034	2.22085	2.22168
CSys (µg/mL)	59	1	0	18.1424	22.3388	20.0586	13.9591	11.446	9.67489	8.37317	7.36991	6.84023	6.37437	5.95825	5.58565	5.25298	4.9573	4.69562	4.46487	4.26197	4.08394	3.92798	3.79154	3.67231	3.56822	3.47747	3.39842	3.32968	3.26997	3.21821	3.17344	3.1348	3.10155	3.07304	3.0487	3.02801	3.01054	2.99589	2.98373	2.97376	2.9657	2.95932	2.95443	2.95085	2.94841	2.94697	2.94642	2.94665	2.94756
CSys (µg/mL)	60	1	0	14.4838	17.8458	15.8488	10.8603	8.80365	7.34615	6.26923	6.26923	5.66408	5.16414	4.74003	4.37559	4.06086	3.78882	3.55389	3.3513	3.17687	3.02689	2.89806	2.78752	2.69276	2.61159	2.54211	2.48271	2.43197	2.38869	2.35181	2.32046	2.29386	2.27133	2.25233	2.23635	2.22298	2.21185	2.20265	2.19511	2.18901	2.18414	2.18034	2.17746	2.17537	2.17396	2.17314	2.17283	2.17297	2.17348
CSys (µg/mL)	61	1	0	13.6951	16.8947	14.9029	10.1176	8.1704	6.79641	5.78102	5.78102	5.21196	4.73831	4.33507	3.98868	3.69051	3.43412	3.21408	3.02559	2.86441	2.72674	2.60926	2.50908	2.42369	2.35094	2.289	2.23627	2.1914	2.15326	2.12085	2.09333	2.07	2.05023	2.03351	2.0194	2.00751	1.99752	1.98916	1.98219	1.97641	1.97164	1.96775	1.9646	1.96209	1.96014	1.95865	1.95756	1.95682	1.95638
CSys (µg/mL)	62	1	0	14.5201	17.8312	15.5086	10.4955	8.55167	7.22758	6.27347	6.27347	5.77213	5.34664	4.97349	4.64208	4.34699	4.08461	3.85195	3.64616	3.46453	3.30447	3.1636	3.03973	2.9309	2.83534	2.75149	2.67797	2.61355	2.55717	2.50787	2.4648	2.42724	2.39454	2.36611	2.34146	2.32013	2.30174	2.28594	2.27242	2.26091	2.25119	2.24303	2.23625	2.2307	2.22622	2.22269	2.22001	2.21806	2.21677
CSys (µg/mL)	63	1	0	14.0286	17.3315	15.4783	10.6371	8.63208	7.20428	6.14408	6.14408	5.54307	5.04589	4.62465	4.26383	3.95362	3.68685	3.45771	3.2612	3.0929	2.94892	2.82586	2.72072	2.63094	2.55429	2.48887	2.43304	2.38539	2.34475	2.31007	2.2805	2.25528	2.23379	2.21547	2.19986	2.18656	2.17525	2.16563	2.15745	2.1505	2.14461	2.13962	2.13539	2.13183	2.12883	2.12631	2.1242	2.12244	2.12099
CSys (µg/mL)	64	1	0	14.6138	18.0171	15.8476	10.7385	8.74582	7.36846	6.35707	6.35707	5.80373	5.32947	4.91454	4.54989	4.23006	3.95061	3.70732	3.49615	3.31325	3.15508	3.01846	2.90057	2.79893	2.71138	2.63603	2.57125	2.51563	2.46794	2.42713	2.39228	2.36258	2.33735	2.316	2.29801	2.28293	2.27038	2.26001	2.25154	2.24471	2.23931	2.23516	2.23207	2.22992	2.22858	2.22794	2.22792	2.22842	2.22939
CSys (µg/mL)	65	1	0	16.6327	20.4887	18.014	12.2827	10.0031	8.41724	7.25393	7.25393	6.61598	6.07683	5.60915	5.19959	4.8404	4.52595	4.25137	4.01218	3.8042	3.62363	3.46699	3.33122	3.21359	3.11172	3.02353	2.94722	2.88121	2.82413	2.77481	2.73222	2.69546	2.66377	2.63648	2.61299	2.59282	2.57552	2.56071	2.54806	2.53729	2.52816	2.52043	2.51394	2.50852	2.50402	2.50032	2.49733	2.49494	2.49308
CSys (µg/mL)	66	1	0	14.3309	17.6732	15.9597	11.1043	9.03472	7.54607	6.44012	5.58799	5.12756	4.73521	4.39519	4.09869	3.84	3.61472	3.41906	3.24958	3.10314	2.97687	2.86818	2.7748	2.69467	2.62604	2.56736	2.51727	2.47461	2.43838	2.4077	2.38182	2.36008	2.34193	2.32687	2.31448	2.30441	2.29634	2.28999	2.28513	2.28157	2.27912	2.27763	2.27697	2.27704	2.27773	2.27895	2.28064	2.28272	2.28516
CSys (µg/mL)	67	1	0	13.7035	21.2108	17.3233	11.7509	9.53275	7.97839	6.82751	6.82751	6.18434	5.63948	5.16961	4.76278	4.41113	4.1082	3.84809	3.62533	3.43493	3.27242	3.13386	3.01581	2.91532	2.82983	2.75717	2.69546	2.64311	2.59875	2.56124	2.52956	2.50288	2.48046	2.46169	2.44604	2.43306	2.42237	2.41362	2.40655	2.40092	2.3965	2.39314	2.39068	2.38899	2.38796	2.3875	2.38753	2.38798	2.38879
CSys (µg/mL)	68	1	0	16.6099	20.4709	18.0213	12.7394	10.4844	8.85737	7.64228	7.64228	6.95119	6.38323	5.90189	5.48649	5.12466	4.80826	4.53132	4.28904	4.07731	3.89251	3.73139	3.59109	3.46902	3.36293	3.27079	3.19085	3.12157	3.06158	3.00971	2.96492	2.92631	2.89309	2.86458	2.84017	2.81934	2.80163	2.78665	2.77404	2.76351	2.75479	2.74764	2.74186	2.73728	2.73375	2.73112	2.72929	2.72815	2.72761
CSys (µg/mL)	69	1	0	13.8581	17.0484	14.9109	10.4212	8.50199	7.11934	6.09149	6.09149	5.50953	5.03625	4.63935	4.30006	4.00692	3.75237	3.53092	3.33826	3.17076	3.0253	2.89915	2.78986	2.69529	2.61358	2.54305	2.48225	2.42993	2.38498	2.34644	2.31346	2.28533	2.26141	2.24115	2.22406	2.20975	2.19783	2.18801	2.18	2.17357	2.16851	2.16464	2.16181	2.15988	2.15874	2.15828	2.15841	2.15905	2.16014
CSys (µg/mL)	70	1	0	16.4407	20.2502	18.067	12.4434	10.1076	8.44569	7.21483	7.21483	6.51877	5.94464	5.45806	5.04	4.67876	4.36618	4.09589	3.86246	3.66116	3.4878	3.33866	3.21049	3.10043	3.006	2.92503	2.85568	2.79632	2.74558	2.70225	2.66532	2.63389	2.6072	2.5846	2.56551	2.54946	2.53603	2.52484	2.5156	2.50803	2.50191	2.49704	2.49324	2.49036	2.48829	2.48692	2.48614	2.48587	2.48606
CSys (µg/mL)	71	1	0	13.0518	16.0897	14.359	9.88178	8.02031	6.69558	5.71477	5.71477	5.16055	4.70412	4.31794	3.98665	3.70084	3.45391	3.24072	3.05692	2.89871	2.76272	2.646	2.54592	2.46021	2.38689	2.32423	2.27076	2.22518	2.1864	2.15347	2.12557	2.10199	2.08213	2.06547	2.05157	2.04003	2.03053	2.02278	2.01653	2.01158	2.00775	2.00487	2.00281	2.00147	2.00073	2.00052	2.00075	2.00137	2.00233
CSys (µg/mL)	72	1	0	16.0411	19.7159	17.3028	12.1444	9.9259	8.32346	7.13136	7.13136	6.45468	5.9061	5.44709	5.05502	4.71611	4.42134	4.16431	3.94005	3.74449	3.57411	3.42585	3.29697	3.18509	3.08806	3.00403	2.93134	2.86855	2.81439	2.76777	2.72773	2.69341	2.66408	2.63912	2.61796	2.60011	2.58515	2.57272	2.56249	2.55418	2.54755	2.54237	2.53848	2.5357	2.53389	2.53294	2.53272	2.53315	2.53415
CSys (µg/mL)	73	1	0	14.4982	17.8859	16.0423	11.0511	8.94002	7.42347	6.29593	6.29593	5.65133	5.12614	4.68734	4.3156	3.9986	3.72766	3.49606	3.29825	3.12954	2.98582	2.86355	2.75966	2.67149	2.59676	2.5335	2.48003	2.43491	2.39692	2.36501	2.33828	2.31598	2.29744	2.28213	2.26956	2.25933	2.25109	2.24457	2.2395	2.23567	2.2329	2.23104	2.22995	2.22952	2.22966	2.23028	2.23131	2.23269	2.23438
CSys (µg/mL)	74	1	0	15.3801	18.9307	16.7365	11.3954	9.19861	7.64616	6.50316	6.50316	5.86447	5.33885	4.89447	4.51374	4.18581	3.90308	3.65951	3.44999	3.27003	3.1157	2.98349	2.87036	2.77365	2.69104	2.62056	2.56049	2.50935	2.46587	2.42898	2.39774	2.37134	2.3491	2.33044	2.31485	2.30189	2.2912	2.28246	2.27538	2.26975	2.26535	2.26202	2.25961	2.25798	2.25704	2.25668	2.25683	2.25741	2.25837
CSys (µg/mL)	75	1	0	12.7862	15.7186	13.7052	9.5717	7.82643	6.57909	5.65655	5.65655	5.14077	4.71924	4.36303	4.05589	3.78819	3.55378	3.34821	3.16799	3.01016	2.87211	2.75152	2.64633	2.55467	2.47491	2.40557	2.34539	2.29322	2.24808	2.20908	2.17547	2.14657	2.1218	2.10064	2.08265	2.06742	2.05462	2.04395	2.03513	2.02794	2.02218	2.01766	2.01424	2.01177	2.01013	2.00923	2.00897	2.00927	2.01007
CSys (µg/mL)	76	1	0	13.7182	16.8679	14.7767	10.3263	8.40786	7.01989	5.9867	5.9867	5.39882	4.92368	4.52795	4.19179	3.9029	3.65308	3.43646	3.24845	3.08532	2.94388	2.82135	2.71531	2.62362	2.54442	2.47608	2.41716	2.36642	2.32278	2.2853	2.25316	2.22565	2.20216	2.18215	2.16516	2.15079	2.13869	2.12855	2.12012	2.11317	2.1075	2.10294	2.09934	2.09658	2.09454	2.09313	2.09226	2.09186	2.09187
CSys (µg/mL)	77	1	0	14.7677	18.2235	16.5241	11.5525	9.40878	7.85433	6.69231	5.79356	5.30087	4.88287	4.52241	4.20957	3.9378	3.70205	3.49802	3.32191	3.17024	3.0399	2.9281	2.83237	2.75053	2.6807	2.62123	2.57069	2.52785	2.49164	2.46114	2.43556	2.41423	2.39655	2.38202	2.37019	2.3607	2.35322	2.34747	2.34321	2.34024	2.33837	2.33745	2.33735	2.33795	2.33916	2.34089	2.34307	2.34563	2.34853
CSys (µg/mL)	78	1	0	14.5835	17.9552	15.7221	10.64	8.6133	7.20139	6.16582	6.16582	5.59641	5.11752	4.70457	4.34518	4.03194	3.75936	3.52275	3.31782	3.14064	2.98767	2.85571	2.74195	2.6439	2.55944	2.48669	2.42404	2.3701	2.32367	2.28372	2.24935	2.2198	2.1944	2.17259	2.15386	2.1378	2.12404	2.11225	2.10218	2.09359	2.08627	2.08005	2.07477	2.07032	2.06658	2.06344	2.06084	2.05869	2.05694
CSys (µg/mL)	79	1	0	12.5345	15.391	13.4667	9.44811	7.74098	6.51801	5.61318	5.61318	5.10623	4.69333	4.34506	4.04469	3.78238	3.55188	3.34885	3.16996	3.01245	2.8739	2.75217	2.64535	2.55171	2.46972	2.398	2.33533	2.28064	2.23296	2.19146	2.1554	2.12413	2.09706	2.07369	2.05358	2.03633	2.02159	2.00908	1.99851	1.98965	1.9823	1.97627	1.9714	1.96756	1.96461	1.96246	1.96099	1.96013	1.95981
CSys (µg/mL)	80	1	0	15.6684	19.3121	16.9714	11.4587	9.22156	7.64959	6.49451	6.49451	5.85422	5.32477	4.87633	4.49261	4.16331	3.88087	3.63904	3.43238	3.25609	3.10593	2.97818	2.86961	2.77743	2.69925	2.633	2.57694	2.52957	2.4896	2.45595	2.42768	2.40402	2.38428	2.36789	2.35435	2.34326	2.33426	2.32704	2.32134	2.31695	2.31367	2.31135	2.30985	2.30905	2.30885	2.30917	2.30994	2.31109	2.31257
CSys (µg/mL)	81	1	0	16.1861	19.9385	17.4957	12.2711	10.0272	8.40383	7.19206	7.19206	6.50089	5.9378	5.46555	5.06235	4.71478	4.4138	4.15281	3.9265	3.73045	3.5608	3.41419	3.28763	3.17851	3.08454	3.00372	2.93431	2.87477	2.82379	2.78023	2.7431	2.71152	2.68477	2.66219	2.64323	2.62739	2.61427	2.6035	2.59476	2.58779	2.58234	2.57821	2.57523	2.57325	2.57212	2.57174	2.57201	2.57283	2.57414
CSys (µg/mL)	82	1	0	14.3149	17.6098	15.3434	10.6536	8.65035	7.20737	6.13503	6.13503	5.5273	5.03378	4.6211	4.26973	3.9676	3.70663	3.48088	3.2856	3.11682	2.97113	2.84551	2.73733	2.64427	2.56432	2.49571	2.4369	2.38657	2.34356	2.30688	2.27565	2.24914	2.2267	2.20777	2.19187	2.17859	2.16757	2.1585	2.15111	2.14517	2.14048	2.13688	2.1342	2.13232	2.13114	2.13055	2.13047	2.13084	2.13158
CSys (µg/mL)	83	1	0	14.7336	18.1409	15.9361	10.8835	8.88747	7.5045	6.49179	6.49179	5.93965	5.47044	5.06085	4.69993	4.38155	4.10128	3.85529	3.63993	3.4518	3.28773	3.1448	3.02042	2.91227	2.8183	2.73673	2.66598	2.60468	2.55163	2.50577	2.4662	2.43213	2.40284	2.37774	2.35629	2.33803	2.32256	2.30953	2.29861	2.28956	2.28213	2.27611	2.27133	2.26763	2.26488	2.26295	2.26174	2.26117	2.26114
CSys (µg/mL)	84	1	0	13.5234	16.6196	14.5236	10.1773	8.33905	7.02555	6.05532	6.05532	5.5146	5.07393	4.70206	4.38134	4.10137	3.85556	3.63928	3.44891	3.28148	3.13435	3.0052	2.89193	2.79269	2.70582	2.62982	2.56339	2.50538	2.45477	2.41065	2.37224	2.33885	2.30986	2.28474	2.26302	2.24429	2.22818	2.21438	2.2026	2.19261	2.18417	2.17712	2.17127	2.16648	2.16262	2.15958	2.15727	2.15558	2.15446
CSys (µg/mL)	85	1	0	16.1247	19.8317	17.4063	11.9076	9.73375	8.23187	7.13717	7.13717	6.54584	6.04532	5.60852	5.22267	4.88091	4.57859	4.31182	4.07702	3.8708	3.68996	3.5316	3.39306	3.27195	3.16618	3.07386	2.99336	2.92323	2.8622	2.80915	2.76311	2.72322	2.68873	2.65897	2.63337	2.61142	2.59268	2.57675	2.56328	2.55199	2.5426	2.53488	2.52863	2.52367	2.51984	2.51701	2.51505	2.51386	2.51335
CSys (µg/mL)	86	1	0	13.9974	17.2488	15.4946	10.6474	8.5763	7.08615	5.98188	5.1359	4.6816	4.29938	3.97243	3.69094	3.44829	3.23941	3.06002	2.90636	2.77503	2.66303	2.56771	2.48671	2.41801	2.35985	2.31072	2.26929	2.23447	2.20528	2.18092	2.16069	2.14397	2.13027	2.11914	2.11022	2.10317	2.09774	2.09368	2.0908	2.08893	2.08791	2.08764	2.08799	2.08888	2.09023	2.09198	2.09407	2.09644	2.09906
CSys (µg/mL)	87	1	0	14.0234	17.2595	15.1686	10.6762	8.748	7.35434	6.31485	6.31485	5.72298	5.24023	4.83415	4.48594	4.18416	3.92127	3.69185	3.49161	3.31699	3.16488	3.03254	2.91754	2.81772	2.7312	2.65629	2.59153	2.53561	2.48742	2.44597	2.41039	2.37994	2.35395	2.33186	2.31317	2.29743	2.28428	2.27338	2.26444	2.25721	2.25147	2.24703	2.24373	2.24141	2.23995	2.23924	2.23918	2.23969	2.24069
CSys (µg/mL)	88	1	0	13.0043	16.0032	13.9737	9.47814	7.71453	6.49775	5.60938	5.60938	5.1284	4.71919	4.36178	4.04686	3.76921	3.52502	3.3109	3.12364	2.96022	2.81785	2.69394	2.58622	2.49264	2.41141	2.34095	2.27989	2.22703	2.18132	2.14184	2.10779	2.07848	2.05331	2.03175	2.01333	1.99765	1.98436	1.97317	1.96379	1.956	1.9496	1.9444	1.94026	1.93704	1.93463	1.93291	1.9318	1.93123	1.93113
CSys (µg/mL)	89	1	0	12.2132	18.8265	15.1954	10.0792	8.04387	6.62715	5.59138	5.59138	5.02399	4.55304	4.15423	3.81431	3.52452	3.278	3.06882	2.89173	2.74209	2.61581	2.50936	2.4197	2.34423	2.28076	2.22741	2.18262	2.14505	2.11358	2.08727	2.0653	2.04701	2.03183	2.01927	2.00894	2.00048	1.99362	1.98811	1.98373	1.98033	1.97775	1.97586	1.97457	1.97379	1.97343	1.97344	1.97377	1.97436	1.97518
CSys (µg/mL)	90	1	0	14.3481	17.678	15.6104	10.6121	8.64823	7.28815	6.29034	6.29034	5.74351	5.27717	4.87001	4.51204	4.19746	3.9218	3.681	3.47123	3.28886	3.13055	2.99326	2.8743	2.77129	2.68215	2.60506	2.53843	2.48089	2.43125	2.38846	2.35162	2.31996	2.29279	2.26952	2.24964	2.2327	2.21832	2.20616	2.19593	2.18738	2.18028	2.17445	2.16972	2.16595	2.16301	2.16079	2.15919	2.15815	2.15758
CSys (µg/mL)	91	1	0	14.2618	17.5323	15.2924	10.6675	8.705	7.29849	6.25694	6.25694	5.67225	5.19608	4.79552	4.45177	4.15355	3.89353	3.66643	3.46812	3.29509	3.14432	3.0131	2.89904	2.80003	2.71418	2.63983	2.57553	2.52001	2.47214	2.43095	2.39558	2.3653	2.33946	2.31748	2.29887	2.28321	2.27012	2.25927	2.25038	2.24319	2.23749	2.23309	2.22983	2.22756	2.22615	2.22549	2.2255	2.22608	2.22716
CSys (µg/mL)	92	1	0	15.8351	19.518	17.6097	12.2923	10.0516	8.45121	7.26644	6.35291	5.8629	5.43994	5.06851	4.74059	4.45126	4.19669	3.97347	3.77835	3.60826	3.4603	3.33184	3.22048	3.12407	3.04073	2.9688	2.90681	2.85349	2.80773	2.76855	2.73511	2.70668	2.6826	2.66232	2.64535	2.63127	2.6197	2.61033	2.60287	2.59708	2.59273	2.58966	2.58768	2.58667	2.5865	2.58706	2.58825	2.59	2.59223
CSys (µg/mL)	93	1	0	13.063	16.1219	14.3921	9.89414	8.0175	6.67799	5.68404	5.68404	5.12007	4.65651	4.26581	3.93234	3.64628	3.40064	3.18986	3.00928	2.85483	2.72292	2.61043	2.51464	2.43317	2.36398	2.3053	2.25563	2.21366	2.17829	2.14855	2.12365	2.10288	2.08565	2.07144	2.05982	2.05042	2.04292	2.03705	2.03256	2.02926	2.02699	2.02558	2.02493	2.02492	2.02545	2.02646	2.02787	2.02962	2.03167
CSys (µg/mL)	94	1	0	16.6612	20.4799	18.2696	12.5007	10.0872	8.37487	7.11783	6.15824	5.65308	5.22135	4.84579	4.51716	4.22957	3.97849	3.75994	3.57026	3.40605	3.26417	3.14178	3.03637	2.94567	2.86774	2.80086	2.74354	2.69448	2.65258	2.61685	2.58647	2.56071	2.53894	2.52064	2.50532	2.49259	2.48209	2.47354	2.46666	2.46123	2.45705	2.45396	2.45182	2.45049	2.44987	2.44986	2.45038	2.45136	2.45275
CSys (µg/mL)	95	1	0	15.6001	19.2411	17.3984	12.1081	9.83368	8.18896	6.96327	6.01838	5.50426	5.06917	4.69477	4.37043	4.08913	3.84549	3.63495	3.45347	3.29738	3.16342	3.04865	2.95048	2.86665	2.79517	2.73433	2.68264	2.63883	2.6018	2.57059	2.54439	2.52249	2.50429	2.48928	2.47701	2.46708	2.45918	2.45302	2.44835	2.44497	2.4427	2.44137	2.44086	2.44105	2.44184	2.44316	2.44491	2.44705	2.44952
CSys (µg/mL)	96	1	0	13.4369	16.5577	14.9558	10.4498	8.53701	7.16454	6.14565	5.35932	4.93436	4.56919	4.24977	3.96865	3.72116	3.50375	3.31333	3.14702	3.00215	2.87623	2.76697	2.67233	2.59046	2.51976	2.45879	2.4063	2.36121	2.32255	2.2895	2.26134	2.23742	2.2172	2.20021	2.18601	2.17427	2.16464	2.15686	2.1507	2.14593	2.14238	2.13989	2.13832	2.13754	2.13747	2.138	2.13905	2.14056	2.14246
CSys (µg/mL)	97	1	0	14.9512	18.3801	16.144	11.3797	9.34688	7.88516	6.79977	6.79977	6.18793	5.68881	5.26766	4.90464	4.58798	4.31017	4.0659	3.85108	3.66228	3.49653	3.35117	3.22383	3.11239	3.01496	2.92986	2.8556	2.79087	2.7345	2.68548	2.64291	2.60599	2.57405	2.54648	2.52273	2.50234	2.48491	2.47006	2.45749	2.44691	2.43808	2.43079	2.42485	2.42009	2.41637	2.41356	2.41155	2.41024	2.40955
CSys (µg/mL)	98	1	0	17.1969	21.1892	18.518	12.4383	9.9953	8.2883	7.03817	7.03817	6.3513	5.78147	5.29739	4.88227	4.52558	4.21943	3.95724	3.73318	3.54205	3.37927	3.24079	3.12309	3.02314	2.93833	2.86644	2.80555	2.75404	2.71053	2.67383	2.64295	2.61701	2.5953	2.57719	2.56216	2.54975	2.53958	2.53132	2.5247	2.51947	2.51543	2.51242	2.51028	2.50888	2.50813	2.50793	2.5082	2.50887	2.5099
CSys (µg/mL)	99	1	0	13.8229	21.405	17.5782	12.0445	9.84317	8.29941	7.15309	7.15309	6.51022	5.96154	5.4845	5.06805	4.70518	4.39011	4.11746	3.88217	3.67955	3.50533	3.3557	3.22732	3.11726	3.02299	2.94234	2.87342	2.81459	2.76447	2.72185	2.68569	2.6551	2.62931	2.60765	2.58956	2.57455	2.56218	2.55211	2.54401	2.53761	2.53268	2.52902	2.52645	2.52483	2.52403	2.52393	2.52445	2.5255	2.527
CSys (µg/mL)	100	1	0	13.5526	16.6544	14.5145	10.1724	8.36068	7.0764	6.13163	6.13163	5.6114	5.18407	4.8199	4.50278	4.22357	3.97665	3.75804	3.56463	3.39374	3.24295	3.1101	2.99321	2.89047	2.80029	2.72121	2.65195	2.59137	2.53846	2.49232	2.45216	2.41728	2.38706	2.36096	2.33848	2.31922	2.30278	2.28885	2.27712	2.26733	2.25927	2.25271	2.2475	2.24346	2.24047	2.23839	2.23712	2.23657	2.23664
CSys (µg/mL)	101	1	0	13.5546	16.636	14.6502	10.3555	8.50937	7.17825	6.18993	6.18993	5.63167	5.17898	4.79882	4.47197	4.18695	3.93649	3.71564	3.52066	3.34855	3.19673	3.06296	2.94519	2.84163	2.75065	2.6708	2.60079	2.53947	2.48583	2.43896	2.39807	2.36245	2.33148	2.30462	2.28138	2.26133	2.24409	2.22934	2.21678	2.20615	2.19722	2.1898	2.1837	2.17876	2.17486	2.17186	2.16966	2.16817	2.16729
CSys (µg/mL)	102	1	0	16.2834	20.0159	17.7687	12.1685	9.91817	8.35952	7.2292	6.36526	5.92394	5.5313	5.17707	4.85744	4.57045	4.31425	4.08672	3.88547	3.70799	3.55181	3.4146	3.29421	3.18869	3.09629	3.01546	2.94482	2.88317	2.82944	2.78267	2.74206	2.70685	2.67642	2.65019	2.62766	2.60839	2.59201	2.57815	2.56653	2.55688	2.54896	2.54257	2.53753	2.53368	2.53087	2.52898	2.52791	2.52755	2.52783
CSys (µg/mL)	103	1	0	14.8611	18.3236	16.1675	10.8802	8.76313	7.28347	6.19696	6.19696	5.5962	5.09494	4.66734	4.29971	3.9833	3.71147	3.47849	3.27929	3.10928	2.96441	2.84112	2.73629	2.64725	2.5717	2.50765	2.45342	2.40758	2.36889	2.3363	2.30893	2.28601	2.26688	2.251	2.2379	2.22716	2.21845	2.21147	2.20597	2.20174	2.1986	2.19639	2.19498	2.19425	2.19411	2.19447	2.19527	2.19644	2.19794
CSys (µg/mL)	104	1	0	13.3367	20.649	16.9229	11.4753	9.27653	7.72725	6.58023	6.58023	5.93641	5.39773	4.93831	4.54411	4.20587	3.91629	3.669	3.4583	3.2791	3.12689	2.99774	2.88823	2.79546	2.71691	2.65046	2.59429	2.54686	2.50686	2.47318	2.44487	2.42113	2.40128	2.38473	2.371	2.35966	2.35037	2.34282	2.33674	2.33194	2.32821	2.3254	2.32339	2.32204	2.32127	2.321	2.32115	2.32166	2.32248
CSys (µg/mL)	105	1	0	16.0542	19.8182	17.9912	12.6481	10.3685	8.72481	7.49815	6.54681	6.02708	5.58003	5.18922	4.84577	4.544	4.27951	4.04838	3.84697	3.67189	3.52	3.38845	3.27467	3.17639	3.0916	3.01853	2.95566	2.90165	2.85532	2.81567	2.78182	2.753	2.72855	2.70789	2.69052	2.676	2.66396	2.65407	2.64604	2.63963	2.63461	2.63081	2.62806	2.62622	2.62517	2.6248	2.62502	2.62575	2.62692
CSys (µg/mL)	106	1	0	13.9362	17.1996	15.4711	10.7924	8.81924	7.4019	6.34479	6.34479	5.73943	5.2405	4.81808	4.45528	4.14167	3.87004	3.63481	3.43132	3.25552	3.10384	2.97313	2.8606	2.76382	2.68065	2.60925	2.548	2.49553	2.45063	2.41226	2.37952	2.35164	2.32796	2.3079	2.29095	2.2767	2.26476	2.25483	2.24663	2.23991	2.23447	2.23014	2.22676	2.22421	2.22236	2.22112	2.2204	2.22013	2.22025
CSys (µg/mL)	107	1	0	15.8308	19.5573	17.3805	11.8448	9.63004	8.07438	6.92118	6.92118	6.27433	5.72692	5.25478	4.84551	4.49112	4.18516	3.92183	3.69578	3.5021	3.33642	3.19483	3.07396	2.97084	2.88295	2.80811	2.74445	2.69036	2.64447	2.60561	2.57278	2.5451	2.52185	2.50239	2.48618	2.47276	2.46173	2.45275	2.44553	2.43983	2.43542	2.43213	2.42979	2.42828	2.42748	2.42728	2.42761	2.4284	2.42957
CSys (µg/mL)	108	1	0	13.9719	17.2118	15.1159	10.234	8.26731	6.88943	5.87638	5.87638	5.31517	4.84657	4.44561	4.09919	3.79923	3.53977	3.3158	3.12287	2.95697	2.81448	2.69223	2.5874	2.49758	2.42064	2.35476	2.29838	2.25015	2.20891	2.17368	2.1436	2.11794	2.09608	2.07747	2.06166	2.04825	2.03691	2.02733	2.01928	2.01253	2.0069	2.00224	1.99841	1.99529	1.99279	1.99081	1.98929	1.98815	1.98736
CSys (µg/mL)	109	1	0	14.5476	17.8952	15.8033	11.2066	9.22549	7.79029	6.71769	6.71769	6.10478	5.60395	5.18136	4.81746	4.50049	4.22284	3.97912	3.76513	3.5774	3.41288	3.26889	3.14303	3.03315	2.93735	2.85392	2.78138	2.71839	2.66379	2.61655	2.57577	2.54065	2.5105	2.48472	2.46275	2.44415	2.42848	2.41539	2.40457	2.39572	2.38862	2.38304	2.3788	2.37572	2.37368	2.37253	2.37217	2.3725	2.37343
CSys (µg/mL)	110	1	0	15.3098	18.8297	16.6749	11.4578	9.34405	7.86475	6.78084	6.78084	6.18434	5.68727	5.2598	4.88658	4.55888	4.27087	4.01803	3.79642	3.60252	3.4331	3.28525	3.15635	3.04405	2.94629	2.86125	2.78732	2.72311	2.6674	2.6191	2.57728	2.54113	2.50992	2.48304	2.45993	2.44012	2.4232	2.4088	2.3966	2.38632	2.37773	2.3706	2.36476	2.36004	2.35631	2.35343	2.3513	2.34983	2.34893
CSys (µg/mL)	111	1	0	13.4576	16.5691	14.4875	10.0787	8.17578	6.79615	5.76695	5.76695	5.17861	4.7031	4.30815	3.97437	3.68948	3.44509	3.23504	3.05444	2.89927	2.76607	2.65187	2.55409	2.47047	2.39907	2.33818	2.28635	2.24232	2.20499	2.17342	2.14681	2.12447	2.10578	2.09025	2.07743	2.06693	2.05844	2.05167	2.04638	2.04236	2.03943	2.03744	2.03626	2.03578	2.03589	2.03652	2.03758	2.03903	2.0408
CSys (µg/mL)	112	1	0	15.0176	18.5014	16.193	10.8886	8.74956	7.25243	6.15532	6.15532	5.55098	5.05046	4.62573	4.26164	3.9487	3.67989	3.44939	3.25213	3.08357	2.93973	2.81711	2.71265	2.62372	2.54804	2.48368	2.42898	2.38251	2.34307	2.30962	2.28128	2.2573	2.23704	2.21995	2.20558	2.19352	2.18344	2.17505	2.16809	2.16237	2.1577	2.15393	2.15094	2.1486	2.14682	2.14553	2.14466	2.14414	2.14392
CSys (µg/mL)	113	1	0	14.3607	17.7128	15.6354	11.0175	9.00341	7.5304	6.42166	6.42166	5.77777	5.25377	4.81608	4.44446	4.12601	3.85186	3.61541	3.4114	3.23544	3.08378	2.95316	2.84073	2.74404	2.66092	2.58951	2.52819	2.47556	2.43041	2.39171	2.35855	2.33016	2.30588	2.28513	2.26741	2.2523	2.23944	2.22852	2.21925	2.2114	2.20479	2.19923	2.19457	2.19069	2.18747	2.18484	2.18269	2.18096	2.1796
CSys (µg/mL)	114	1	0	13.9706	17.1898	15.1785	10.7596	8.85477	7.47422	6.44184	6.44184	5.85121	5.36832	4.96082	4.60999	4.30455	4.03717	3.80262	3.59684	3.41643	3.25844	3.12024	2.9995	2.89415	2.80233	2.72239	2.65288	2.59254	2.54022	2.49493	2.45582	2.42211	2.39314	2.36831	2.34712	2.32912	2.3139	2.30113	2.2905	2.28174	2.27461	2.26892	2.26449	2.26116	2.25878	2.25725	2.25645	2.25629	2.25669
CSys (µg/mL)	115	1	0	13.8038	16.9795	14.8289	9.8327	7.84409	6.46609	5.46558	5.46558	4.92341	4.47599	4.09727	3.77329	3.49532	3.25696	3.05293	2.87862	2.72994	2.60332	2.4956	2.40403	2.32626	2.26027	2.2043	2.15688	2.11675	2.08283	2.05419	2.03007	2.00978	1.99277	1.97854	1.9667	1.95689	1.94881	1.94221	1.93687	1.93261	1.92927	1.92671	1.92483	1.92352	1.92271	1.92232	1.92229	1.92257	1.92312
CSys (µg/mL)	116	1	0	15.5433	19.1462	16.9023	11.6097	9.5072	8.04535	6.97195	6.97195	6.38316	5.88288	5.44608	5.06091	4.72075	4.4209	4.15729	3.92612	3.7238	3.547	3.39267	3.25806	3.14074	3.03853	2.94955	2.87213	2.80481	2.74633	2.69555	2.65152	2.61338	2.58038	2.55189	2.52733	2.5062	2.48808	2.47258	2.45938	2.44818	2.43874	2.43083	2.42425	2.41885	2.41447	2.41098	2.40828	2.40625	2.40483
CSys (µg/mL)	117	1	0	12.2861	15.042	13.0971	9.142	7.47429	6.29028	5.42377	5.42377	4.94863	4.56552	4.24404	3.9669	3.72407	3.50941	3.31889	3.14956	2.99906	2.86538	2.74676	2.64158	2.54841	2.46595	2.39302	2.32856	2.27164	2.2214	2.17711	2.13808	2.10374	2.07355	2.04704	2.0238	2.00345	1.98569	1.9702	1.95674	1.94507	1.93499	1.92633	1.91891	1.91261	1.90729	1.90285	1.89917	1.89619	1.89381
CSys (µg/mL)	118	1	0	15.4185	18.9263	16.7789	11.4771	9.33259	7.84411	6.76596	5.94497	5.52643	5.1569	4.82497	4.526	4.25756	4.0177	3.80438	3.61537	3.4484	3.30122	3.17168	3.05782	2.95784	2.87012	2.79322	2.72588	2.66695	2.61546	2.57051	2.53133	2.49724	2.46764	2.442	2.41984	2.40076	2.38439	2.37042	2.35855	2.34854	2.34017	2.33324	2.32759	2.32305	2.31951	2.31684	2.31494	2.31371	2.31308
CSys (µg/mL)	119	1	0	13.816	17.0369	15.1061	10.3093	8.32785	6.92355	5.8876	5.8876	5.30706	4.83017	4.42813	4.0848	3.79014	3.53702	3.31977	3.13358	2.97427	2.83815	2.722	2.62299	2.53868	2.46696	2.40601	2.35429	2.31045	2.27335	2.24202	2.21562	2.19344	2.17487	2.15939	2.14656	2.13599	2.12736	2.12039	2.11485	2.11052	2.10723	2.10485	2.10323	2.10227	2.10187	2.10197	2.10248	2.10335	2.10452
CSys (µg/mL)	120	1	0	14.7164	18.1117	15.8537	10.7793	8.78012	7.397	6.38506	6.38506	5.83412	5.36575	4.95704	4.59726	4.28038	4.00196	3.75809	3.54507	3.3594	3.19785	3.05746	2.93558	2.82987	2.73825	2.65892	2.59029	2.53099	2.47981	2.4357	2.39776	2.36519	2.3373	2.31349	2.29322	2.27605	2.26158	2.24946	2.23938	2.23109	2.22436	2.21899	2.21479	2.21163	2.20937	2.20789	2.20709	2.20689	2.20721
CSys (µg/mL)	121	1	0	14.0587	17.3248	15.4422	10.6579	8.69315	7.30555	6.28233	6.28233	5.71106	5.23719	4.8325	4.48194	4.17664	3.91053	3.67883	3.47743	3.3027	3.15133	3.02039	2.90725	2.80961	2.72542	2.65293	2.59057	2.53702	2.49111	2.45181	2.41827	2.38972	2.36549	2.34503	2.32783	2.31346	2.30155	2.29178	2.28387	2.27758	2.27269	2.26903	2.26642	2.26474	2.26387	2.26369	2.26413	2.2651	2.26653
CSys (µg/mL)	122	1	0	15.6087	19.2196	17.1285	11.949	9.84169	8.35865	7.26299	7.26299	6.65226	6.13743	5.68997	5.29569	4.94675	4.63794	4.36512	4.12461	3.91299	3.72709	3.56398	3.42101	3.29582	3.18628	3.0905	3.00683	2.9338	2.87012	2.81466	2.76643	2.72455	2.68825	2.65685	2.62977	2.60647	2.5865	2.56946	2.55499	2.54278	2.53256	2.52408	2.51714	2.51155	2.50714	2.50377	2.50132	2.49967	2.49873
CSys (µg/mL)	123	1	0	13.9505	17.1942	15.3746	10.5987	8.6063	7.18718	6.13724	6.13724	5.54447	5.05813	4.64784	4.29651	3.99369	3.73212	3.50624	3.31139	3.14356	2.9992	2.87519	2.76878	2.67759	2.59951	2.53276	2.47575	2.42714	2.38576	2.35061	2.32083	2.29568	2.27451	2.25677	2.24199	2.22976	2.21972	2.21159	2.20509	2.2	2.19613	2.19332	2.19141	2.19028	2.18983	2.18997	2.19062	2.1917	2.19316
CSys (µg/mL)	124	1	0	17.5285	21.5829	19.181	13.2431	10.7937	9.05848	7.77623	7.77623	7.05672	6.46034	5.95162	5.51148	5.12853	4.795	4.50476	4.2526	4.03389	3.84448	3.68066	3.53913	3.41697	3.31165	3.22092	3.14285	3.07576	3.01819	2.96885	2.92667	2.89068	2.86006	2.8341	2.81217	2.79374	2.77835	2.76559	2.75512	2.74663	2.73985	2.73457	2.73058	2.72772	2.72583	2.7248	2.7245	2.72484	2.72573
CSys (µg/mL)	125	1	0	14.6974	18.0857	15.8418	10.8151	8.84979	7.49672	6.50916	6.50916	5.97613	5.52014	5.11919	4.76349	4.44779	4.16835	3.92179	3.70485	3.5144	3.34746	3.20132	3.07348	2.96175	2.86416	2.77897	2.70467	2.63992	2.58355	2.53452	2.49193	2.45499	2.423	2.39536	2.37154	2.35106	2.33351	2.31854	2.30583	2.29509	2.2861	2.27863	2.27249	2.26753	2.2636	2.26057	2.25834	2.2568	2.25587
CSys (µg/mL)	126	1	0	17.0144	20.9199	18.6131	12.7912	10.44	8.80614	7.61839	6.70922	6.24186	5.82699	5.45331	5.11647	4.81417	4.54436	4.30472	4.09271	3.9057	3.74107	3.59637	3.46933	3.35789	3.26023	3.1747	3.09987	3.03445	2.97733	2.92751	2.88413	2.8464	2.81366	2.78532	2.76084	2.73977	2.7217	2.70627	2.69316	2.6821	2.67285	2.66518	2.65892	2.65388	2.64993	2.64693	2.64477	2.64335	2.64258
CSys (µg/mL)	127	1	0	15.0146	18.4454	16.3394	11.1604	9.08711	7.65479	6.61807	5.82648	5.42374	5.06451	4.73966	4.446	4.18191	3.94584	3.73594	3.55006	3.38596	3.24142	3.11429	3.00263	2.90465	2.81876	2.74355	2.67775	2.62025	2.57008	2.52638	2.48837	2.45538	2.42683	2.40218	2.38098	2.36283	2.34736	2.33425	2.32324	2.31406	2.30651	2.30039	2.29553	2.29179	2.28904	2.28715	2.28603	2.28558	2.28573
CSys (µg/mL)	128	1	0	13.8901	17.0927	15.1592	10.4079	8.46564	7.09703	6.08891	6.08891	5.5267	5.05932	4.65943	4.31251	4.01001	3.74606	3.516	3.31583	3.14194	2.99112	2.86047	2.74741	2.64967	2.56524	2.49238	2.42956	2.37546	2.32893	2.28897	2.25472	2.22541	2.20039	2.17911	2.16106	2.14582	2.13303	2.12235	2.11351	2.10627	2.10042	2.09577	2.09217	2.08948	2.08759	2.08638	2.08577	2.08568	2.08604
CSys (µg/mL)	129	1	0	13.1266	20.3038	16.5508	11.2104	9.09449	7.61617	6.52366	6.52366	5.91602	5.4003	4.95461	4.5679	4.23298	3.94392	3.69528	3.48198	3.29937	3.14327	3.00996	2.89623	2.79928	2.71671	2.64644	2.58671	2.536	2.49301	2.45664	2.42592	2.40006	2.37835	2.3602	2.3451	2.33261	2.32236	2.31403	2.30734	2.30207	2.29802	2.295	2.29287	2.29152	2.29082	2.29069	2.29105	2.29183	2.29297
CSys (µg/mL)	130	1	0	16.2896	20.0759	17.6718	12.4795	10.2567	8.64939	7.44701	7.44701	6.76	6.19551	5.71762	5.30587	4.94792	4.63556	4.36275	4.12462	3.91701	3.73622	3.57901	3.44245	3.32397	3.22127	3.13236	3.05546	2.98904	2.93174	2.88239	2.83996	2.80355	2.77239	2.74579	2.72317	2.704	2.68785	2.67431	2.66305	2.65377	2.64622	2.64016	2.63541	2.63178	2.62914	2.62736	2.62631	2.6259	2.62605
CSys (µg/mL)	131	1	0	14.8341	18.2463	16.1305	11.0343	8.92873	7.43827	6.34033	6.34033	5.72619	5.22121	4.79396	4.42705	4.10994	3.83537	3.59774	3.39233	3.21503	3.06221	2.93065	2.81752	2.72032	2.63691	2.56538	2.50412	2.45172	2.40695	2.36877	2.33627	2.30867	2.2853	2.26557	2.24899	2.23513	2.22361	2.21412	2.20637	2.20014	2.1952	2.1914	2.18856	2.18657	2.18531	2.18467	2.18458	2.18497	2.18576
CSys (µg/mL)	132	1	0	14.4683	17.8253	15.6455	10.6145	8.67328	7.34027	6.36437	6.36437	5.83562	5.37862	4.97514	4.61746	4.30116	4.02263	3.77829	3.56457	3.37803	3.21544	3.07385	2.95063	2.84346	2.75028	2.66931	2.59897	2.53791	2.48494	2.43901	2.39923	2.3648	2.33505	2.30936	2.28723	2.26819	2.25185	2.23786	2.22592	2.21578	2.20719	2.19997	2.19393	2.18893	2.18484	2.18153	2.1789	2.17688	2.17538
CSys (µg/mL)	133	1	0	16.3463	20.1294	17.855	12.254	9.96222	8.34487	7.15161	7.15161	6.48425	5.92938	5.4552	5.04479	4.68801	4.37776	4.10834	3.87481	3.67273	3.49813	3.34746	3.21757	3.10569	3.00941	2.92662	2.85549	2.79445	2.74213	2.69734	2.65907	2.62642	2.59865	2.57507	2.55514	2.53835	2.52428	2.51257	2.50289	2.49496	2.48856	2.48348	2.47954	2.47659	2.47449	2.47313	2.47241	2.47225	2.47257
CSys (µg/mL)	134	1	0	13.0272	15.9836	14.0771	9.52372	7.70916	6.46209	5.56554	4.8861	4.54674	4.2452	3.97309	3.72731	3.50632	3.30872	3.13294	2.9772	2.83962	2.71836	2.61164	2.51785	2.43549	2.36325	2.29993	2.24449	2.196	2.15364	2.11669	2.08451	2.05653	2.03227	2.01128	1.99318	1.97763	1.96432	1.953	1.94342	1.93539	1.92871	1.92324	1.91883	1.91535	1.9127	1.91077	1.90948	1.90876	1.90854
CSys (µg/mL)	135	1	0	14.839	18.2827	16.1081	10.9429	8.92759	7.53664	6.51718	6.51718	5.96112	5.48457	5.06678	4.69836	4.3739	4.08913	3.84009	3.62292	3.43395	3.26979	3.12734	3.00384	2.89686	2.80427	2.72419	2.65499	2.59527	2.54378	2.49946	2.46138	2.42872	2.40079	2.37695	2.3567	2.33955	2.32511	2.31303	2.303	2.29475	2.28806	2.28272	2.27857	2.27544	2.2732	2.27174	2.27097	2.27078	2.27112
CSys (µg/mL)	136	1	0	15.0229	18.4376	15.9349	11.004	8.94235	7.4793	6.40415	6.40415	5.81005	5.32567	4.91697	4.56489	4.2582	3.98967	3.75414	3.54752	3.36635	3.20762	3.06864	2.94702	2.84064	2.74761	2.66626	2.59514	2.53297	2.4786	2.43107	2.3895	2.35314	2.32135	2.29353	2.2692	2.24791	2.22927	2.21296	2.19869	2.18619	2.17524	2.16566	2.15726	2.14991	2.14347	2.13783	2.13288	2.12855	2.12476
CSys (µg/mL)	137	1	0	15.1826	18.746	16.9214	11.8916	9.77922	8.26385	7.13209	7.13209	6.48426	5.94622	5.48683	5.08904	4.74258	4.44043	4.17712	3.94799	3.74895	3.57632	3.42679	3.29746	3.18572	3.08929	3.00619	2.93467	2.87321	2.82049	2.77536	2.73684	2.70404	2.67622	2.65272	2.63298	2.61649	2.60285	2.59166	2.58261	2.57542	2.56984	2.56566	2.5627	2.56079	2.5598	2.5596	2.5601	2.56119	2.56281
CSys (µg/mL)	138	1	0	13.5719	16.7309	15.024	10.3153	8.31183	6.87343	5.80841	4.9922	4.55472	4.1854	3.86858	3.5952	3.35914	3.15568	2.98074	2.83071	2.70234	2.59271	2.49925	2.41968	2.35204	2.29462	2.24595	2.20475	2.16996	2.14063	2.11597	2.09531	2.07807	2.06374	2.0519	2.04219	2.0343	2.02797	2.02296	2.01908	2.01618	2.0141	2.01273	2.01195	2.0117	2.01188	2.01244	2.01331	2.01446	2.01583
CSys (µg/mL)	139	1	0	15.0138	18.4389	16.0408	10.871	8.87178	7.51187	6.53235	6.53235	6.01894	5.58213	5.19813	4.85638	4.55157	4.28018	4.03923	3.82588	3.6374	3.47115	3.3247	3.19582	3.0825	2.98293	2.89551	2.81883	2.75161	2.69276	2.6413	2.59635	2.55717	2.52306	2.49344	2.46779	2.44564	2.42657	2.41024	2.39633	2.38454	2.37464	2.3664	2.35963	2.35416	2.34983	2.34653	2.34412	2.3425	2.34159
CSys (µg/mL)	140	1	0	13.226	16.2443	14.2554	10.0705	8.30171	7.03861	6.1053	6.1053	5.58565	5.16032	4.79903	4.48496	4.20846	3.96362	3.74636	3.55358	3.38268	3.23137	3.09759	2.97945	2.87525	2.78345	2.70268	2.63168	2.56936	2.51474	2.46693	2.42516	2.38874	2.35706	2.32959	2.30583	2.28537	2.26782	2.25286	2.24019	2.22954	2.22069	2.21342	2.20755	2.20293	2.1994	2.19685	2.19516	2.19423	2.19397
CSys (µg/mL)	141	1	0	14.7266	18.1379	16.3257	11.3124	9.17855	7.64705	6.51275	5.64178	5.17415	4.77667	4.43265	4.1328	3.87113	3.64314	3.44499	3.27322	3.12466	2.99645	2.88598	2.79096	2.70933	2.63931	2.57934	2.52806	2.48429	2.44701	2.41535	2.38853	2.3659	2.34689	2.33101	2.31783	2.30699	2.29817	2.29109	2.28552	2.28125	2.27811	2.27594	2.27461	2.27401	2.27403	2.2746	2.27564	2.27708	2.27887
CSys (µg/mL)	142	1	0	13.1713	16.259	14.4325	9.84617	8.02169	6.74417	5.798	5.798	5.26873	4.81821	4.42711	4.08588	3.78851	3.53018	3.3065	3.11332	2.94682	2.80354	2.68037	2.57459	2.48382	2.40599	2.33931	2.28225	2.23347	2.19183	2.15635	2.12617	2.10056	2.07889	2.06062	2.04528	2.03246	2.02182	2.01307	2.00593	2.00019	1.99565	1.99216	1.98956	1.98774	1.9866	1.98603	1.98596	1.98632	1.98706
CSys (µg/mL)	143	1	0	14.374	17.7297	15.9668	11.0682	9.00592	7.53192	6.43963	5.5971	5.14384	4.75365	4.41269	4.11358	3.85153	3.62268	3.42353	3.25078	3.10134	2.97234	2.86119	2.76557	2.68343	2.61298	2.55266	2.50109	2.4571	2.41967	2.3879	2.36104	2.33842	2.31947	2.30368	2.29064	2.27996	2.27134	2.26448	2.25915	2.25514	2.25228	2.2504	2.24937	2.24907	2.24941	2.2503	2.25165	2.25342	2.25553
CSys (µg/mL)	144	1	0	15.8547	19.5875	17.4645	11.9594	9.75409	8.20427	7.05457	7.05457	6.40892	5.86154	5.38809	4.97629	4.61835	4.3081	4.04	3.80891	3.61011	3.43934	3.29282	3.1672	3.0596	2.96751	2.88875	2.82146	2.76404	2.71511	2.67348	2.63813	2.60818	2.58288	2.56158	2.54372	2.52882	2.51648	2.50633	2.49807	2.49144	2.48621	2.48219	2.47922	2.47714	2.47584	2.47521	2.47515	2.4756	2.47648
CSys (µg/mL)	145	1	0	13.7753	16.984	15.2297	10.6235	8.70491	7.33769	6.3229	6.3229	5.74867	5.27272	4.86652	4.51459	4.20773	3.93972	3.70579	3.50189	3.32445	3.17027	3.03647	2.92049	2.82008	2.73322	2.65816	2.59339	2.53755	2.48948	2.44817	2.41274	2.38242	2.35655	2.33454	2.31589	2.30016	2.28697	2.27599	2.26693	2.25954	2.2536	2.24893	2.24535	2.24272	2.24093	2.23985	2.2394	2.23949	2.24006
CSys (µg/mL)	146	1	0	13.6496	16.751	14.6557	10.3117	8.48197	7.18039	6.22319	6.22319	5.69525	5.26532	4.90146	4.58587	4.30833	4.06262	3.84452	3.65086	3.47902	3.32672	3.1919	3.0727	2.96743	2.87456	2.79273	2.72069	2.65736	2.60175	2.55299	2.5103	2.47301	2.44049	2.41222	2.3877	2.36651	2.34828	2.33267	2.31939	2.30816	2.29877	2.29099	2.28465	2.27958	2.27565	2.27271	2.27066	2.2694	2.26883
CSys (µg/mL)	147	1	0	13.0505	16.0391	13.96	9.44147	7.67889	6.46966	5.59161	5.59161	5.12159	4.72177	4.37178	4.0623	3.78831	3.54627	3.33308	3.1458	2.98163	2.83795	2.71233	2.60262	2.50686	2.42332	2.35051	2.28707	2.23185	2.18382	2.14208	2.10585	2.07445	2.04727	2.02378	2.00354	1.98612	1.97118	1.95842	1.94755	1.93835	1.93061	1.92414	1.91879	1.91442	1.9109	1.90813	1.90602	1.90448	1.90344
CSys (µg/mL)	148	1	0	14.0739	17.2963	15.0761	10.4461	8.45254	7.01195	5.94173	5.94173	5.33387	4.84459	4.43922	4.09693	3.80463	3.55354	3.33728	3.15089	2.9903	2.85206	2.73317	2.63106	2.54346	2.4684	2.40417	2.34928	2.30245	2.26257	2.22869	2.19996	2.17568	2.15523	2.13809	2.12379	2.11194	2.1022	2.09428	2.08793	2.08293	2.0791	2.07627	2.0743	2.07308	2.0725	2.07247	2.07292	2.07377	2.07498
CSys (µg/mL)	149	1	0	16.4253	20.236	18.1451	12.4923	10.1284	8.44689	7.20606	6.25248	5.74458	5.30763	4.9261	4.59175	4.29915	4.04392	3.82207	3.62981	3.46363	3.32027	3.1968	3.0906	2.99938	2.92111	2.85405	2.79667	2.74765	2.70586	2.67031	2.64016	2.61468	2.59322	2.57524	2.56027	2.54791	2.53779	2.52962	2.52314	2.51811	2.51434	2.51167	2.50994	2.50903	2.50883	2.50925	2.5102	2.51161	2.51343
CSys (µg/mL)	150	1	0	15.0186	18.4342	16.3228	11.1244	9.01726	7.55303	6.49233	5.68566	5.27432	4.91293	4.58989	4.30023	4.04122	3.81069	3.6064	3.42606	3.26731	3.12788	3.00561	2.89853	2.80486	2.72299	2.65151	2.58916	2.53484	2.48757	2.4465	2.41088	2.38005	2.35342	2.3305	2.31082	2.29399	2.27968	2.26757	2.2574	2.24893	2.24197	2.23631	2.23181	2.22833	2.22574	2.22394	2.22282	2.22232	2.22234
CSys (µg/mL)	151	1	0	11.5708	14.1956	12.2604	8.49162	6.93551	5.84262	5.04648	5.04648	4.61661	4.2659	3.96833	3.70977	3.4823	3.28107	3.10272	2.94469	2.80479	2.68109	2.57184	2.47546	2.39051	2.3157	2.24989	2.19204	2.14123	2.09665	2.05758	2.02339	1.9935	1.96743	1.94472	1.92499	1.90789	1.89312	1.8804	1.86951	1.86022	1.85236	1.84576	1.84026	1.83575	1.83211	1.82923	1.82704	1.82544	1.82437
CSys (µg/mL)	152	1	0	13.7942	16.9944	15.2549	10.5308	8.54546	7.13019	6.08516	5.28227	4.85381	4.4859	4.16478	3.8831	3.63619	3.42036	3.23231	3.06896	2.92744	2.80508	2.69947	2.60844	2.53008	2.46271	2.40487	2.35526	2.3128	2.27651	2.24556	2.21924	2.19691	2.17804	2.16217	2.14888	2.13782	2.12871	2.12126	2.11526	2.11051	2.10683	2.10409	2.10216	2.10092	2.10028	2.10015	2.10048	2.10119	2.10222
CSys (µg/mL)	153	1	0	15.6566	19.3037	17.4853	12.2332	9.97375	8.33934	7.12043	6.17928	5.66603	5.22997	4.85289	4.52446	4.23797	3.98839	3.77143	3.5833	3.42053	3.27998	3.15884	3.05457	2.96497	2.88807	2.82218	2.76582	2.71769	2.67669	2.64185	2.61233	2.58741	2.56648	2.54898	2.53446	2.52251	2.51278	2.50497	2.49881	2.49409	2.49061	2.48819	2.4867	2.48601	2.486	2.48659	2.48769	2.48924	2.49116
CSys (µg/mL)	154	1	0	14.1845	17.4527	15.2569	10.7205	8.81523	7.45739	6.45373	6.45373	5.89561	5.43702	5.04694	4.70833	4.41136	4.1498	3.91919	3.71598	3.53712	3.3799	3.24188	3.12086	3.01485	2.92209	2.841	2.77019	2.70842	2.65461	2.6078	2.56714	2.53189	2.50141	2.47511	2.4525	2.43313	2.4166	2.40258	2.39077	2.3809	2.37273	2.36606	2.36071	2.35653	2.35337	2.3511	2.34963	2.34885	2.34869
CSys (µg/mL)	155	1	0	12.7465	15.6935	14.0691	9.73176	7.92715	6.64935	5.70974	4.98834	4.60705	4.2763	3.98446	3.72577	3.49675	3.29469	3.11707	2.96145	2.82546	2.70689	2.60369	2.51398	2.4361	2.36858	2.3101	2.25951	2.21583	2.17816	2.14574	2.11791	2.09408	2.07373	2.05644	2.04179	2.02946	2.01916	2.01061	2.0036	1.99793	1.99343	1.98995	1.98735	1.98552	1.98437	1.9838	1.98374	1.98412	1.98489
CSys (µg/mL)	156	1	0	13.3109	16.3968	14.7967	10.3515	8.47973	7.14377	6.15519	5.39268	4.98365	4.6295	4.31723	4.04029	3.79472	3.57756	3.38614	3.21793	3.07049	2.94153	2.82892	2.73073	2.64523	2.57086	2.50624	2.45018	2.40161	2.3596	2.32333	2.29208	2.26523	2.24223	2.2226	2.20591	2.1918	2.17995	2.17007	2.16191	2.15526	2.14992	2.14574	2.14256	2.14027	2.13873	2.13787	2.13759	2.13781	2.13848
CSys (µg/mL)	157	1	0	14.8959	18.3279	16.2838	11.1978	9.1104	7.63569	6.5474	6.5474	5.93742	5.43059	4.99724	4.62158	4.29425	4.00881	3.7602	3.54402	3.35637	3.19372	3.05293	2.93117	2.82599	2.73519	2.65687	2.58939	2.53131	2.48137	2.4385	2.40174	2.3703	2.34346	2.32061	2.30123	2.28485	2.27107	2.25955	2.24999	2.24213	2.23574	2.23063	2.22664	2.22361	2.22141	2.21995	2.21911	2.21882	2.21901
CSys (µg/mL)	158	1	0	14.5946	17.9484	15.6674	10.5366	8.56011	7.21164	6.23429	6.23429	5.71406	5.26902	4.87836	4.53288	4.22754	3.95853	3.72233	3.51555	3.33492	3.17737	3.04011	2.92064	2.81672	2.7264	2.64795	2.57986	2.52083	2.46969	2.42545	2.38723	2.35427	2.3259	2.30153	2.28067	2.26287	2.24774	2.23494	2.22419	2.21521	2.20779	2.20174	2.19687	2.19305	2.19013	2.18801	2.18659	2.18578	2.18549
CSys (µg/mL)	159	1	0	13.3544	16.4751	14.4818	9.79307	7.95876	6.68599	5.74797	5.74797	5.23068	4.78762	4.40116	4.06298	3.76782	3.51121	3.28894	3.09696	2.93147	2.78901	2.66652	2.56127	2.4709	2.39335	2.32685	2.26987	2.2211	2.17939	2.14378	2.11341	2.08756	2.06561	2.04701	2.03131	2.0181	2.00703	1.99783	1.99022	1.98398	1.97894	1.97491	1.97177	1.96939	1.96767	1.96652	1.96586	1.96561	1.96574
CSys (µg/mL)	160	1	0	14.6041	17.982	15.7536	10.6957	8.69036	7.29791	6.27777	6.27777	5.71972	5.24795	4.83878	4.4807	4.16697	3.89265	3.65346	3.44542	3.26484	3.10835	2.97288	2.85572	2.75447	2.66704	2.5916	2.52655	2.47052	2.4223	2.38086	2.34529	2.31482	2.28877	2.26655	2.24766	2.23164	2.21813	2.20678	2.19732	2.18949	2.18307	2.17789	2.17376	2.17057	2.16817	2.16647	2.16538	2.16481	2.16469
CSys (µg/mL)	161	1	0	16.3261	20.1565	18.2979	12.796	10.4139	8.68214	7.38567	6.38276	5.83163	5.36581	4.96573	4.6199	4.32059	4.06184	3.83866	3.64658	3.48165	3.34029	3.21934	3.11601	3.02786	2.95279	2.88894	2.83474	2.78882	2.75001	2.71731	2.68984	2.66686	2.64774	2.63193	2.61895	2.60841	2.59995	2.59329	2.58816	2.58435	2.58167	2.57995	2.57907	2.57889	2.57932	2.58028	2.58167	2.58345	2.58556
CSys (µg/mL)	162	1	0	12.8545	15.8123	13.8731	9.43865	7.66245	6.4246	5.51791	5.51791	5.02026	4.60265	4.24219	3.92738	3.65157	3.41007	3.19905	3.01504	2.85488	2.71568	2.59481	2.48995	2.39905	2.32027	2.25205	2.193	2.14191	2.09774	2.05959	2.02665	1.99825	1.97379	1.95275	1.93468	1.9192	1.90596	1.89466	1.88506	1.87693	1.87008	1.86434	1.85956	1.85562	1.85241	1.84983	1.8478	1.84625	1.84511
CSys (µg/mL)	163	1	0	16.02	19.6949	17.4954	11.9755	9.74567	8.19619	7.07076	6.21087	5.76994	5.37995	5.02991	4.71541	4.43399	4.18352	3.96165	3.76589	3.59366	3.44246	3.30994	3.19393	3.09249	3.00387	2.92652	2.85909	2.80038	2.74933	2.705	2.66659	2.63338	2.60474	2.58011	2.55901	2.54102	2.52575	2.51288	2.50211	2.49319	2.48591	2.48005	2.47545	2.47196	2.46944	2.46777	2.46685	2.4666	2.46692
CSys (µg/mL)	164	1	0	15.5965	19.2345	17.331	11.97	9.6751	8.02089	6.79227	5.84853	5.33931	4.90985	4.54173	4.22419	3.95001	3.71363	3.51032	3.3359	3.18659	3.05906	2.95031	2.85772	2.77903	2.71226	2.65569	2.60787	2.56753	2.5336	2.50515	2.48139	2.46165	2.44535	2.43198	2.42114	2.41245	2.4056	2.40034	2.39642	2.39367	2.3919	2.39099	2.3908	2.39124	2.39221	2.39363	2.39545	2.39761	2.40005
CSys (µg/mL)	165	1	0	16.1724	19.9267	17.6323	12.4768	10.2241	8.57625	7.33639	7.33639	6.61679	6.03152	5.54227	5.12599	4.76818	4.45901	4.19131	3.95942	3.75866	3.58501	3.43498	3.3055	3.19388	3.09779	3.01516	2.9442	2.88335	2.83127	2.78677	2.74883	2.71658	2.68925	2.66617	2.64677	2.63056	2.61711	2.60604	2.59703	2.58981	2.58412	2.57977	2.57657	2.57437	2.57302	2.57242	2.57246	2.57305	2.57411
CSys (µg/mL)	166	1	0	14.7709	18.1659	16.0366	10.9965	8.96923	7.55498	6.51935	6.51935	5.95113	5.47495	5.06346	4.70295	4.38571	4.10654	3.8613	3.6463	3.45816	3.2938	3.15039	3.0254	2.91654	2.82183	2.7395	2.66798	2.60592	2.55214	2.50558	2.46534	2.43063	2.40075	2.3751	2.35313	2.33439	2.31848	2.30503	2.29374	2.28434	2.27658	2.27027	2.26523	2.26128	2.25831	2.25617	2.25478	2.25403	2.25385
CSys (µg/mL)	167	1	0	13.3977	16.4794	14.3849	10.0718	8.25342	6.95341	5.99008	5.99008	5.45006	5.00648	4.62991	4.30401	4.01924	3.76941	3.55007	3.35764	3.18904	3.04154	2.91269	2.80027	2.70233	2.6171	2.54304	2.47876	2.42307	2.37489	2.3333	2.29747	2.2667	2.24035	2.21788	2.1988	2.18269	2.16918	2.15795	2.14872	2.14122	2.13526	2.13063	2.12717	2.12474	2.1232	2.12244	2.12237	2.12289	2.12394
CSys (µg/mL)	168	1	0	12.5555	15.4517	13.8474	9.52784	7.70048	6.39451	5.43074	4.69284	4.29961	3.96516	3.67554	3.42304	3.2027	3.01077	2.84401	2.69952	2.57464	2.46691	2.37416	2.29442	2.22596	2.16728	2.11704	2.07412	2.0375	2.00633	1.97986	1.95746	1.93856	1.92269	1.90944	1.89844	1.88938	1.88201	1.87608	1.87141	1.86781	1.86515	1.86328	1.86211	1.86153	1.86147	1.86185	1.86261	1.8637	1.86507
CSys (µg/mL)	169	1	0	16.0237	19.7573	17.7422	12.4291	10.2553	8.71592	7.57114	7.57114	6.924	6.37688	5.90128	5.48293	5.11373	4.78812	4.50153	4.24987	4.0293	3.8363	3.66765	3.52044	3.39205	3.28019	3.18281	3.09813	3.02457	2.96075	2.90546	2.85765	2.81638	2.78086	2.75035	2.72426	2.70201	2.68315	2.66725	2.65394	2.6429	2.63386	2.62656	2.62079	2.61636	2.61311	2.61089	2.60957	2.60904	2.6092
CSys (µg/mL)	170	1	0	14.3536	17.6558	15.8264	10.9104	8.82879	7.34146	6.24472	5.40581	4.95975	4.58059	4.25208	3.9653	3.71459	3.49574	3.30519	3.13971	2.99635	2.87242	2.76547	2.67333	2.59405	2.52595	2.46752	2.41748	2.3747	2.33821	2.30716	2.28082	2.25855	2.2398	2.22411	2.21107	2.20031	2.19153	2.18446	2.17888	2.17458	2.17139	2.16917	2.16778	2.16712	2.16707	2.16757	2.16854	2.16991	2.17163
CSys (µg/mL)	171	1	0	14.5808	17.8968	15.5189	10.8202	8.87477	7.50202	6.49506	6.49506	5.94369	5.48946	5.10102	4.76163	4.46193	4.19615	3.96024	3.75099	3.56561	3.40158	3.25663	3.12867	3.01581	2.91636	2.82879	2.75175	2.68402	2.62453	2.57233	2.52659	2.48655	2.45155	2.42102	2.39444	2.37135	2.35135	2.33408	2.31922	2.3065	2.29566	2.2865	2.27881	2.27243	2.2672	2.263	2.25969	2.25718	2.25538
CSys (µg/mL)	172	1	0	15.5382	19.1151	16.8158	11.8367	9.68771	8.12933	6.96454	6.96454	6.29726	5.75377	5.29759	4.9073	4.56978	4.27636	4.02078	3.79812	3.60428	3.43572	3.28932	3.16232	3.0523	2.95708	2.87479	2.80376	2.74254	2.68985	2.64459	2.6058	2.57263	2.54436	2.52034	2.50002	2.48291	2.46861	2.45673	2.44697	2.43905	2.43273	2.42779	2.42406	2.42137	2.41959	2.4186	2.4183	2.41858	2.41939
CSys (µg/mL)	173	1	0	13.3413	16.4406	14.7858	10.2847	8.41285	7.0865	6.10918	5.35639	4.95683	4.60864	4.30024	4.02604	3.78271	3.56759	3.37815	3.2119	3.06642	2.93938	2.82866	2.7323	2.64856	2.57587	2.51288	2.45836	2.41126	2.37066	2.33574	2.30579	2.28018	2.25837	2.23989	2.22432	2.21129	2.20049	2.19163	2.18447	2.1788	2.17443	2.1712	2.16895	2.16758	2.16696	2.167	2.16762	2.16875	2.17031
CSys (µg/mL)	174	1	0	13.4087	16.4767	14.3965	9.72123	7.84634	6.54212	5.5912	5.5912	5.07275	4.64154	4.27218	3.9516	3.67214	3.42853	3.21649	3.0323	2.87259	2.73433	2.61477	2.5115	2.42237	2.34552	2.2793	2.22229	2.17327	2.13116	2.09504	2.06411	2.03766	2.0151	1.99591	1.97964	1.9659	1.95434	1.94468	1.93667	1.93008	1.92472	1.92043	1.91707	1.91452	1.91265	1.9114	1.91067	1.91039	1.9105
CSys (µg/mL)	175	1	0	14.8524	18.2796	16.1565	11.1021	9.07037	7.65122	6.60923	6.60923	6.03519	5.55222	5.13382	4.76682	4.44379	4.15963	3.91015	3.69162	3.50057	3.33381	3.18843	3.06183	2.95168	2.85592	2.77273	2.70054	2.63796	2.58376	2.53689	2.49642	2.46155	2.43155	2.40582	2.38382	2.36508	2.34918	2.33576	2.32452	2.31517	2.30749	2.30125	2.29628	2.29241	2.28951	2.28746	2.28615	2.28548	2.28537
CSys (µg/mL)	176	1	0	13.9572	17.209	15.4665	10.6974	8.70072	7.27956	6.23011	5.42258	4.99194	4.62055	4.29527	4.00925	3.75811	3.53834	3.3467	3.18014	3.03577	2.91091	2.80311	2.71019	2.6302	2.56146	2.50247	2.45193	2.40872	2.37187	2.34052	2.31394	2.29149	2.27263	2.25688	2.24381	2.23308	2.22437	2.21741	2.21197	2.20785	2.20486	2.20287	2.20172	2.20132	2.20156	2.20236	2.20364	2.20533	2.20739
CSys (µg/mL)	177	1	0	15.8206	19.5027	17.3669	11.9606	9.73418	8.15516	6.9855	6.9855	6.326	5.778	5.31056	4.90692	4.55686	4.25313	3.98989	3.7621	3.56526	3.39538	3.24889	3.12265	3.01393	2.92033	2.83977	2.77046	2.71085	2.6596	2.61556	2.57773	2.54526	2.5174	2.49353	2.47309	2.45561	2.44069	2.42796	2.41714	2.40796	2.40019	2.39364	2.38815	2.38356	2.37976	2.37665	2.37411	2.37209	2.37051
CSys (µg/mL)	178	1	0	15.9386	19.5999	17.3244	11.8406	9.57265	7.96809	6.78811	6.78811	6.13	5.59082	5.13593	4.74606	4.40952	4.11833	3.8664	3.64865	3.4607	3.2987	3.15922	3.03926	2.9362	2.84774	2.77189	2.70692	2.65134	2.60386	2.56337	2.5289	2.49962	2.47483	2.45391	2.43633	2.42163	2.40941	2.39934	2.39113	2.38452	2.37929	2.37525	2.37225	2.37014	2.3688	2.36814	2.36805	2.36846	2.36931
CSys (µg/mL)	179	1	0	13.4806	20.7321	16.7158	11.1223	8.92267	7.40278	6.29558	6.29558	5.69541	5.19261	4.76195	4.39048	4.07006	3.79433	3.55774	3.35525	3.18229	3.03477	2.90909	2.80212	2.71115	2.63384	2.56821	2.51253	2.46536	2.42544	2.39173	2.36331	2.33941	2.31937	2.30263	2.2887	2.27719	2.26774	2.26005	2.25386	2.24897	2.24517	2.24233	2.24029	2.23895	2.23821	2.23798	2.23819	2.23877	2.23969
CSys (µg/mL)	180	1	0	15.1372	18.6557	16.4197	11.0637	8.94405	7.47148	6.39212	6.39212	5.79966	5.30042	4.8702	4.49681	4.1727	3.89206	3.64975	3.44108	3.26173	3.10781	2.97588	2.86289	2.76621	2.68354	2.61293	2.55266	2.50129	2.45755	2.42038	2.38884	2.36215	2.33962	2.32068	2.3048	2.29157	2.28062	2.27162	2.2643	2.25843	2.2538	2.25025	2.24762	2.24579	2.24464	2.24408	2.24404	2.24443	2.2452
CSys (µg/mL)	181	1	0	14.2947	17.5853	15.4649	10.5917	8.67071	7.34336	6.37369	6.37369	5.84773	5.39999	5.00757	4.65993	4.3514	4.07809	3.83665	3.6239	3.43684	3.2726	3.12858	3.00238	2.89189	2.7952	2.71063	2.63672	2.57217	2.51582	2.46668	2.42387	2.38662	2.35425	2.32616	2.30182	2.2808	2.26266	2.24708	2.23373	2.22234	2.21267	2.20451	2.19768	2.19202	2.18738	2.18363	2.18068	2.17842	2.17676
CSys (µg/mL)	182	1	0	15.1091	18.6435	16.7752	11.5497	9.32832	7.73328	6.5511	5.64358	5.15656	4.74447	4.39041	4.08462	3.82052	3.59289	3.39724	3.22955	3.08616	2.9638	2.85958	2.77096	2.69571	2.63193	2.57797	2.5324	2.49401	2.46176	2.43477	2.41227	2.39361	2.37824	2.36568	2.35552	2.34742	2.34108	2.33625	2.3327	2.33026	2.32877	2.32808	2.32809	2.3287	2.32981	2.33135	2.33328	2.33552	2.33803
CSys (µg/mL)	183	1	0	13.249	16.3334	14.64	10.0092	8.04451	6.63649	5.59552	4.79886	4.37346	4.01466	3.70735	3.44274	3.21482	3.01893	2.851	2.70745	2.58502	2.48084	2.39234	2.3173	2.25377	2.20007	2.15478	2.11665	2.08463	2.05783	2.03547	2.01689	2.00155	1.98896	1.97872	1.97048	1.96395	1.95887	1.95503	1.95225	1.95037	1.94926	1.9488	1.9489	1.94947	1.95045	1.95178	1.9534	1.95527	1.95735
CSys (µg/mL)	184	1	0	13.6245	16.7363	14.5469	10.106	8.23195	6.89497	5.90931	5.90931	5.36097	4.91536	4.54078	4.21919	3.93989	3.69596	3.4825	3.29567	3.13227	2.98948	2.86486	2.75619	2.66151	2.57911	2.50743	2.44515	2.39108	2.34418	2.30354	2.26838	2.238	2.21179	2.18923	2.16985	2.15326	2.13909	2.12705	2.11687	2.1083	2.10115	2.09524	2.09041	2.08652	2.08346	2.08112	2.07941	2.07825	2.07757
CSys (µg/mL)	185	1	0	14.7051	18.1067	15.9411	11.2468	9.22876	7.76806	6.67682	6.67682	6.05388	5.54508	5.11667	4.74907	4.43036	4.15267	3.91032	3.6988	3.51436	3.3537	3.21394	3.0925	2.98711	2.89576	2.81667	2.7483	2.68927	2.6384	2.59464	2.55708	2.52492	2.49748	2.47415	2.4544	2.43777	2.42386	2.41233	2.40286	2.39519	2.3891	2.38438	2.38084	2.37835	2.37676	2.37596	2.37585	2.37634	2.37734
CSys (µg/mL)	186	1	0	15.6115	19.1779	16.8033	11.8345	9.73359	8.23251	7.12286	7.12286	6.5039	5.9976	5.56826	5.196	4.86932	4.58106	4.32627	4.10107	3.90224	3.72691	3.5725	3.43668	3.31735	3.2126	3.12075	3.0403	2.9699	2.90836	2.85465	2.80784	2.76711	2.73173	2.70108	2.6746	2.65178	2.6322	2.61547	2.60126	2.58925	2.5792	2.57086	2.56404	2.55855	2.55424	2.55095	2.54858	2.54701	2.54614
CSys (µg/mL)	187	1	0	13.0664	16.0866	14.4881	10.0667	8.18573	6.8357	5.83503	5.06535	4.65074	4.29682	3.98911	3.71967	3.48349	3.27681	3.09642	2.93941	2.80307	2.68494	2.58277	2.49456	2.41852	2.35306	2.29681	2.24856	2.20725	2.17196	2.14191	2.1164	2.09483	2.07668	2.06149	2.04888	2.0385	2.03005	2.02328	2.01797	2.01393	2.01098	2.00897	2.00779	2.00733	2.00748	2.00816	2.00931	2.01086	2.01275
CSys (µg/mL)	188	1	0	14.0288	17.282	15.4946	10.6657	8.64491	7.2061	6.14314	5.32515	4.88761	4.5107	4.18127	3.89233	3.63931	3.41846	3.22638	3.05982	2.91576	2.7914	2.68421	2.59194	2.51261	2.44447	2.38602	2.33594	2.2931	2.25651	2.22533	2.19882	2.17635	2.15737	2.14141	2.12806	2.11697	2.10783	2.10038	2.0944	2.08968	2.08606	2.08338	2.08153	2.08039	2.07988	2.07989	2.08038	2.08127	2.08251
CSys (µg/mL)	189	1	0	14.8479	18.2961	16.076	11.2938	9.23556	7.74347	6.62723	6.62723	5.98773	5.46579	5.02752	4.65308	4.33018	4.05054	3.80806	3.59784	3.41576	3.25824	3.12215	3.00472	2.90351	2.81641	2.74154	2.67727	2.6222	2.5751	2.5349	2.50067	2.47162	2.44706	2.42637	2.40904	2.39462	2.38272	2.37299	2.36516	2.35895	2.35416	2.35059	2.34807	2.34647	2.34566	2.34553	2.346	2.34697	2.34839
CSys (µg/mL)	190	1	0	13.8353	17.025	14.8378	9.97396	8.10733	6.83231	5.90436	5.90436	5.40728	4.9791	4.602	4.26832	3.97372	3.71469	3.48781	3.28969	3.11704	2.96683	2.83628	2.7229	2.6245	2.53914	2.46515	2.40105	2.34557	2.29759	2.25613	2.22036	2.18954	2.16304	2.14028	2.12079	2.10415	2.08999	2.07798	2.06786	2.05938	2.05232	2.0465	2.04177	2.03799	2.03502	2.03277	2.03115	2.03007	2.02946
CSys (µg/mL)	191	1	0	14.4325	17.7695	15.5013	10.3708	8.37521	7.00314	6.00365	6.00365	5.46432	5.00648	4.60902	4.26187	3.95897	3.6955	3.46709	3.26964	3.09931	2.9526	2.82638	2.7179	2.62474	2.5448	2.47626	2.41756	2.36735	2.32445	2.28786	2.25671	2.23026	2.20786	2.18895	2.17306	2.15977	2.14873	2.13963	2.1322	2.12622	2.12149	2.11784	2.11512	2.11321	2.112	2.11139	2.1113	2.11167	2.11243
CSys (µg/mL)	192	1	0	13.3779	16.4311	14.4545	10.1888	8.35074	7.021	6.02969	6.02969	5.46432	5.00415	4.61719	4.2848	3.99571	3.74266	3.52054	3.32543	3.1541	3.00377	2.87197	2.75653	2.6555	2.56713	2.4899	2.42243	2.36354	2.31215	2.26735	2.22831	2.19433	2.16476	2.13907	2.11677	2.09743	2.08069	2.06622	2.05374	2.04299	2.03377	2.02587	2.01914	2.01342	2.00859	2.00453	2.00115	1.99836	1.99608
CSys (µg/mL)	193	1	0	14.9749	18.4506	16.2862	11.5171	9.45425	7.95375	6.82781	6.82781	6.17901	5.64838	5.20171	4.81896	4.48779	4.19998	3.94948	3.73148	3.54195	3.37738	3.23467	3.11109	3.00422	2.91192	2.83233	2.7638	2.7049	2.65439	2.61116	2.57427	2.54289	2.51631	2.49389	2.4751	2.45946	2.44655	2.43602	2.42757	2.4209	2.4158	2.41206	2.4095	2.40795	2.4073	2.40741	2.4082	2.40956	2.41143
CSys (µg/mL)	194	1	0	15.1639	18.6313	16.176	11.2947	9.26985	7.83613	6.77944	6.77944	6.19529	5.71168	5.2971	4.93483	4.61543	4.33297	4.08315	3.86242	3.66768	3.49613	3.34519	3.21253	3.09605	2.99387	2.9043	2.82586	2.75721	2.69721	2.64482	2.59913	2.55934	2.52476	2.49475	2.46878	2.44636	2.42707	2.41053	2.39643	2.38446	2.37437	2.36594	2.35897	2.35328	2.34872	2.34517	2.34248	2.34057	2.33934
CSys (µg/mL)	195	1	0	12.7501	15.671	13.6167	9.50896	7.80316	6.597	5.71088	5.71088	5.22459	4.82448	4.48308	4.18565	3.92385	3.69249	3.48789	3.30712	3.14761	3.00709	2.88348	2.77487	2.67957	2.59605	2.52293	2.459	2.40319	2.35452	2.31217	2.27539	2.24351	2.21597	2.19224	2.17188	2.15449	2.13972	2.12726	2.11684	2.10821	2.10116	2.0955	2.09108	2.08774	2.08536	2.08382	2.08302	2.08288	2.08331
CSys (µg/mL)	196	1	0	15.569	19.2047	16.9683	11.9639	9.77603	8.17424	6.96857	6.96857	6.26839	5.70013	5.22694	4.82644	4.48431	4.19068	3.93821	3.7211	3.53451	3.37432	3.23697	3.11938	3.01883	2.933	2.85985	2.79763	2.74483	2.70013	2.66241	2.63069	2.60414	2.58204	2.56377	2.5488	2.53666	2.52696	2.51937	2.51358	2.50935	2.50647	2.50474	2.504	2.50412	2.50498	2.50647	2.50852	2.51103	2.51395
CSys (µg/mL)	197	1	0	13.4293	16.5356	14.8598	10.3167	8.41349	7.06033	6.0628	5.29622	4.8887	4.53652	4.22665	3.95248	3.71	3.49614	3.30814	3.14337	2.99934	2.87367	2.76421	2.66898	2.58623	2.51439	2.45209	2.39811	2.35139	2.31102	2.27617	2.24616	2.22034	2.1982	2.17926	2.16311	2.1494	2.1378	2.12806	2.11992	2.1132	2.10769	2.10326	2.09975	2.09705	2.09505	2.09367	2.09282	2.09243	2.09244
CSys (µg/mL)	198	1	0	15.9929	19.7035	17.3003	12.1825	10.0016	8.43059	7.25961	7.25961	6.59566	6.05118	5.59073	5.19419	4.84948	4.54864	4.28584	4.05637	3.85624	3.68193	3.5303	3.39857	3.28426	3.18518	3.09941	3.02525	2.96122	2.90602	2.85852	2.81775	2.78282	2.753	2.72763	2.70614	2.68803	2.67288	2.66029	2.64995	2.64156	2.63487	2.62967	2.62577	2.623	2.62121	2.62028	2.6201	2.62058	2.62162
CSys (µg/mL)	199	1	0	14.295	17.6103	15.5689	10.661	8.66584	7.26066	6.22322	6.22322	5.6434	5.15851	4.74235	4.38122	4.06688	3.79343	3.55598	3.3502	3.17219	3.01842	2.88573	2.77132	2.67276	2.58789	2.51486	2.45206	2.3981	2.35176	2.31202	2.27797	2.24884	2.22395	2.20273	2.18467	2.16936	2.15641	2.1455	2.13635	2.12874	2.12244	2.11728	2.1131	2.10977	2.10719	2.10523	2.10383	2.10291	2.1024
CSys (µg/mL)	200	1	0	14.3271	17.6364	15.547	10.9737	8.99673	7.56147	6.48774	6.48774	5.87224	5.37101	4.95044	4.59076	4.27979	4.00948	3.77402	3.56885	3.39021	3.23481	3.0998	2.98266	2.88115	2.7933	2.71737	2.65185	2.5954	2.54686	2.50521	2.46957	2.43915	2.4133	2.39141	2.37298	2.35756	2.34477	2.33426	2.32574	2.31895	2.31368	2.30972	2.3069	2.30508	2.30413	2.30394	2.3044	2.30543	2.30697
[truncated: 953 more columns]

[truncated: 3 more sheets: AUC0(Sub)(CPlasma), AUC3(Sub)(CPlasma), AUC]
